# Supplementary material for: Single Cell Multiome Atlas of the Human Developing Retina
Source: Research Square preprint supplement (doi:10.21203/rs.3.rs-3417373/v1), 2023-10-11
Supplement: Supplementary file 1 [file 277130fd43fee280c7bcf24f.xlsx]

## Sheet: Sheet1
Sample.ID	Donor.ID	Days	Post conception week	Genome	Pipeline.version	Estimated.number.of.cells	Feature.linkages.detected	Linked.genes	Linked.peaks	ATAC.Confidently.mapped.read.pairs	ATAC.Fraction.of.genome.in.peaks	ATAC.Fraction.of.high.quality.fragments.in.cells	ATAC.Fraction.of.high.quality.fragments.overlapping.TSS	ATAC.Fraction.of.high.quality.fragments.overlapping.peaks	ATAC.Fraction.of.transposition.events.in.peaks.in.cells	ATAC.Mean.raw.read.pairs.per.cell	ATAC.Median.high.quality.fragments.per.cell	ATAC.Non.nuclear.read.pairs	ATAC.Number.of.peaks	ATAC.Percent.duplicates	ATAC.Q30.bases.in.barcode	ATAC.Q30.bases.in.read.1	ATAC.Q30.bases.in.read.2	ATAC.Q30.bases.in.sample.index.i1	ATAC.Sequenced.read.pairs	ATAC.TSS.enrichment.score	ATAC.Unmapped.read.pairs	ATAC.Valid.barcodes	GEX.Fraction.of.transcriptomic.reads.in.cells	GEX.Mean.raw.reads.per.cell	GEX.Median.UMI.counts.per.cell	GEX.Median.genes.per.cell	GEX.Percent.duplicates	GEX.Q30.bases.in.UMI	GEX.Q30.bases.in.barcode	GEX.Q30.bases.in.read.2	GEX.Reads.mapped.antisense.to.gene	GEX.Reads.mapped.confidently.to.exonic.regions	GEX.Reads.mapped.confidently.to.genome	GEX.Reads.mapped.confidently.to.intergenic.regions	GEX.Reads.mapped.confidently.to.intronic.regions	GEX.Reads.mapped.confidently.to.transcriptome	GEX.Reads.mapped.to.genome	GEX.Reads.with.TSO	GEX.Sequenced.read.pairs	GEX.Total.genes.detected	GEX.Valid.UMIs	GEX.Valid.barcodes	GEX.Q30.bases.in.sample.index.i1
Multiome_10w_FR	1	70	PCW10	GRCh38	cellranger-arc-1.0.0	6189	77515	9677	24112	0.90894	0.02428	0.88716	0.27482	0.37354	0.35285	56161.7	14004	0.01177	76285	0.45505	0.9404	0.95007	0.94983	0.91929	347584673	6.92586	0.00725	0.99021	0.87616	64859.1	9166	3719	0.62514	0.97244	0.97451	0.93301	0.21936	0.30525	0.93257	0.05859	0.56873	0.64741	0.9622	0.0584	401412767	31141	0.99952	0.95122	0.9809
Multiome_10w_NR	1	70	PCW10	GRCh38	cellranger-arc-1.0.0	4717	46660	7879	15675	0.88822	0.01974	0.82586	0.25659	0.31855	0.30001	90768.3	17312	0.01724	64188	0.46352	0.94084	0.95116	0.94946	0.94214	428154064	6.61535	0.01855	0.99111	0.89473	104878	12673	4443	0.65996	0.97531	0.9767	0.93379	0.15261	0.28502	0.93389	0.06598	0.58288	0.70686	0.9644	0.08887	494708672	31549	0.99958	0.96126	0.98573
Multi_Fetal_11w2d_FR	2	79	PCW10	GRCh38	cellranger-arc-2.0.0	12692	49465	9039	16872	0.8884	0.0182	0.7019	0.2141	0.1992	0.1785	63830.4	13404	0.0146	66198	0.3547	0.937	0.9493	0.9507	0.9173	810134935	4.4639	0.0119	0.9852	0.7635	61339.2	9909	3850.5	0.4605	0.9714	0.9737	0.9347	0.2239	0.2833	0.9224	0.0585	0.5806	0.6326	0.9662	0.081	778517135	32428	0.9994	0.9437	NA
Multi_Fetal_11w2d_FRre	2	79	PCW10	GRCh38	cellranger-arc-2.0.0	15964	48562	9100	16940	0.8715	0.0181	0.7402	0.2332	0.2178	0.1999	47092.9	10426	0.0139	65895	0.457	0.9125	0.9571	0.9654	0.9327	751791361	4.8342	0.0266	0.9866	0.785	49923.3	9702.5	3549	0.5348	0.9433	0.9478	0.9118	0.0993	0.2233	0.92	0.0616	0.6351	0.7494	0.9527	0.1808	796975802	32227	0.9995	0.9576	NA
Multi_Fetal_11w2d_NR	2	79	PCW10	GRCh38	cellranger-arc-2.0.0	12675	140247	12549	39484	0.9007	0.0313	0.815	0.2946	0.3579	0.3338	37397.1	11578	0.0103	112948	0.3449	0.922	0.9737	0.9661	0.9402	474008701	6.2858	0.0068	0.9842	0.8238	67913.7	6923	2964	0.6968	0.9706	0.9725	0.9386	0.2362	0.2444	0.9322	0.0655	0.6223	0.6231	0.9635	0.0757	860805940	31931	0.9988	0.9402	NA
Multi_12w3d_FR	3	87	PCW13	GRCh38	cellranger-arc-1.0.0	8522	80323	10231	26992	0.89672	0.02605	0.89028	0.30238	0.41332	0.39413	39113	10218	0.01009	77749	0.44512	0.92908	0.96311	0.9608	0.91559	333321369	7.17962	0.02087	0.98902	0.89484	47676.7	7474	3233	0.59426	0.97261	0.9737	0.93328	0.2313	0.28088	0.93416	0.05358	0.5997	0.64171	0.96309	0.05525	406301078	31389	0.9995	0.94995	0.97327
Multi_12w3d_NR	3	87	PCW13	GRCh38	cellranger-arc-1.0.0	9318	66069	8662	32928	0.91637	0.03223	0.86792	0.32108	0.49914	0.47692	42026.1	7104.5	0.0259	100618	0.47667	0.93552	0.96056	0.95831	0.94251	391598979	7.96367	0.00791	0.98956	0.8894	38383.9	4698	2302.5	0.60467	0.97493	0.97576	0.9326	0.20151	0.27596	0.93931	0.06219	0.60115	0.66795	0.96568	0.06331	357661018	31108	0.99955	0.95521	0.97097
Multi_Fetal_13W_FR	4	91	PCW13	GRCh38	cellranger-arc-2.0.0	17628	533604	16422	77032	0.9068	0.037	0.8641	0.3274	0.4218	0.382	64037.7	14250	0.0191	135500	0.5367	0.9364	0.9612	0.9526	0.9279	1128855714	6.7808	0.0096	0.9868	0.9124	41629	7635.5	3144	0.4943	0.9699	0.9719	0.9315	0.2448	0.2495	0.9321	0.0556	0.6269	0.6242	0.9594	0.0715	733835757	32504	0.9994	0.9441	NA
Multi_Fetal_13W_NR	4	91	PCW13	GRCh38	cellranger-arc-2.0.0	20000	786435	16939	83132	0.9042	0.0376	0.7862	0.3131	0.4159	0.3798	61016.1	17133	0.0216	137363	0.3922	0.9372	0.9597	0.9541	0.9485	1220321728	6.291	0.0094	0.9865	0.8036	46497.5	7474.5	3121	0.5557	0.9707	0.9733	0.9335	0.2153	0.2345	0.9326	0.0614	0.6367	0.6484	0.9602	0.0726	929949629	32565	0.9995	0.9542	NA
Multiome_14w2d_FR	5	100	PCW16	GRCh38	cellranger-arc-1.0.0	6300	76114	9601	23619	0.90414	0.02171	0.88007	0.29408	0.38319	0.36427	59082.5	10993	0.01189	67124	0.52404	0.93754	0.96154	0.95955	0.93727	372219808	7.96393	0.0113	0.98977	0.87321	70623.4	7808.5	3342	0.66472	0.97253	0.97424	0.93242	0.20494	0.32311	0.9318	0.05445	0.55424	0.66492	0.9634	0.05028	444927725	31261	0.99953	0.95472	0.96733
Multiome_14w2d_NR	5	100	PCW16	GRCh38	cellranger-arc-1.0.0	7414	216435	12979	64356	0.92067	0.0435	0.91002	0.37606	0.63187	0.60835	44013.2	7163	0.02358	138019	0.5562	0.93935	0.95834	0.95715	0.93795	326313588	10.3031	0.01357	0.98952	0.91706	52146	6539.5	2848	0.59588	0.97461	0.97585	0.93328	0.2375	0.24228	0.93328	0.06164	0.62936	0.62625	0.96349	0.05804	386610453	31118	0.99952	0.94959	0.98374
Multi_Fetal_14w5d_FR	6	103	PCW16	GRCh38	cellranger-arc-2.0.0	20000	296052	15133	56527	0.9022	0.03	0.7587	0.3079	0.3778	0.3472	53930.4	8970	0.0203	108983	0.5015	0.9377	0.9514	0.9534	0.9155	1078607146	7.3273	0.0107	0.9859	0.8458	40178.7	5804	2613	0.5476	0.9706	0.973	0.9359	0.236	0.2635	0.9344	0.0563	0.6146	0.6343	0.9626	0.0667	803573612	32574	0.9993	0.9431	NA
Multi_Fetal_14w5d_NR	6	103	PCW16	GRCh38	cellranger-arc-2.0.0	9195	108255	10877	41551	0.9118	0.0366	0.9043	0.3461	0.4566	0.4293	29387.1	7490	0.021	130299	0.4654	0.9195	0.9706	0.9648	0.9636	270214747	8.5656	0.0078	0.9844	0.8782	46841.2	5115	2354	0.7059	0.9709	0.9727	0.9406	0.2377	0.2527	0.9335	0.0634	0.6174	0.6249	0.9654	0.0772	430704816	30783	0.9988	0.9401	NA
Multiome_16w4d_FR	7	116	PCW16	GRCh38	cellranger-arc-1.0.0	5932	19550	5892	11499	0.86501	0.01547	0.74581	0.26252	0.29598	0.27805	58135.8	7785	0.00945	54263	0.46313	0.9348	0.96201	0.95935	0.9404	344861769	7.02584	0.03972	0.98586	0.79572	71749.4	8320.5	3177	0.57236	0.97371	0.97492	0.92702	0.21032	0.28933	0.92413	0.05687	0.57793	0.64908	0.95802	0.07163	425617352	31444	0.99954	0.95144	0.97622
Multiome_16w4d_NR	7	116	PCW16	GRCh38	cellranger-arc-1.0.0	5375	58266	8609	26403	0.90628	0.0264	0.83738	0.34877	0.49997	0.47839	60453.1	5941	0.03339	85918	0.63789	0.94074	0.95193	0.95077	0.92834	324935165	10.0106	0.0115	0.98968	0.8633	73327.1	7049	2743	0.68891	0.97512	0.97589	0.93121	0.23952	0.27449	0.93302	0.06073	0.59781	0.62551	0.96072	0.04571	394132929	30831	0.99949	0.94974	0.97696
Multi_Fetal_19W4d_FR	8	137	PCW20	GRCh38	cellranger-arc-2.0.0	20000	710774	17057	102007	0.9133	0.0393	0.8718	0.3584	0.4415	0.4049	63656.1	13109	0.0228	143292	0.5453	0.9367	0.9605	0.9533	0.9329	1273122508	7.5124	0.0098	0.9866	0.9047	32752.9	5629.5	2375	0.5204	0.971	0.9736	0.9338	0.2728	0.1999	0.9358	0.0559	0.68	0.5991	0.9615	0.0651	655057155	32408	0.9993	0.9403	NA
Multi_Fetal_19W4d_NR	8	137	PCW20	GRCh38	cellranger-arc-2.0.0	19190	951878	16769	91961	0.9096	0.0353	0.8843	0.3674	0.4732	0.4333	64638.5	13687.5	0.0282	128299	0.5648	0.9337	0.9575	0.9496	0.9224	1240413449	7.9127	0.0094	0.9855	0.9102	55298.2	5446	2372.5	0.7587	0.9717	0.9739	0.933	0.2605	0.2219	0.9317	0.0581	0.6517	0.6056	0.9582	0.0489	1061172644	31958	0.9994	0.9429	NA
Multiome_20w1d_FR	9	141	PCW20	GRCh38	cellranger-arc-1.0.0	6466	42236	8036	18534	0.90387	0.02037	0.8835	0.28393	0.3447	0.32759	52376.6	9980	0.01572	60878	0.52028	0.93576	0.96299	0.96038	0.94515	338667239	7.47702	0.0091	0.98919	0.85859	58830.7	6931	2880	0.62398	0.97471	0.97574	0.92902	0.21554	0.27814	0.92427	0.05466	0.59147	0.64623	0.96069	0.07862	380399000	31190	0.99955	0.9525	0.95858
Multiome_20w1d_NR	9	141	PCW20	GRCh38	cellranger-arc-1.0.0	7529	106653	9847	37433	0.91379	0.02993	0.88054	0.35869	0.52484	0.50468	48719.2	5698	0.02748	89730	0.61764	0.93698	0.96013	0.95851	0.94542	366806908	9.87371	0.00908	0.98962	0.89594	52901.9	5338	2331	0.70329	0.97539	0.97606	0.935	0.24942	0.25878	0.93275	0.0567	0.61727	0.61927	0.96385	0.06122	398298518	30598	0.99951	0.94657	0.96739
Multi_Fetal_20W2d_FR	10	142	PCW20	GRCh38	cellranger-arc-2.0.0	14273	312386	13748	55757	0.8973	0.0269	0.7832	0.3193	0.3644	0.3334	75523	15713	0.0124	97767	0.4377	0.9377	0.9571	0.9527	0.9099	1077939148	6.4484	0.0106	0.9869	0.7972	53958.7	6761	2745	0.5587	0.972	0.9741	0.9351	0.258	0.2442	0.9377	0.0537	0.6398	0.6181	0.9624	0.0657	770152079	32282	0.9994	0.9437	NA
Multi_Fetal_20W2d_NR	10	142	PCW20	GRCh38	cellranger-arc-2.0.0	17708	540987	15722	74709	0.9005	0.0319	0.828	0.3725	0.4723	0.4304	66109.3	9104	0.0246	115782	0.6549	0.9382	0.9428	0.952	0.9031	1170663624	8.3022	0.0099	0.9872	0.8534	43890.3	5888	2445	0.6297	0.9701	0.972	0.9352	0.2786	0.2336	0.9235	0.0531	0.6369	0.5848	0.9621	0.0692	777208906	31820	0.9993	0.9373	NA
Multi_Fetal_23w1d_FR	11	162	PCW23	GRCh38	cellranger-arc-2.0.0	20000	453545	17212	77291	0.9082	0.0324	0.8245	0.34	0.4008	0.3679	53611.9	10262.5	0.0198	117835	0.5269	0.9351	0.9623	0.9513	0.9402	1072237935	7.8315	0.0092	0.9865	0.8564	36529.2	5940	2456	0.5418	0.9705	0.9725	0.9335	0.2551	0.2232	0.9365	0.0536	0.6598	0.6196	0.9618	0.0759	730584468	32209	0.9993	0.945	NA
Multi_Fetal_23w1d_NR	11	162	PCW23	GRCh38	cellranger-arc-2.0.0	15725	307997	14114	67123	0.9008	0.0335	0.783	0.3852	0.4785	0.4363	87100.6	6521	0.0549	121598	0.7503	0.9361	0.9581	0.9515	0.9201	1369656370	8.2788	0.0114	0.9863	0.8635	47041.6	5358	2259	0.6799	0.9717	0.9737	0.9362	0.2711	0.2223	0.9252	0.0528	0.6501	0.5939	0.9664	0.0837	739729280	31391	0.9994	0.939	NA
Multiome_23w4d_FR	12	165	PCW23	GRCh38	cellranger-arc-1.0.0	6461	32695	7462	12501	0.89609	0.01384	0.82379	0.26692	0.27739	0.26117	58545.8	10305	0.01767	43435	0.53127	0.93834	0.94118	0.93934	0.92688	378264324	7.05741	0.0095	0.99026	0.79884	72173	7607	3038	0.65659	0.97308	0.97379	0.9327	0.21248	0.28328	0.91691	0.05619	0.57744	0.64032	0.95796	0.07261	466309438	31317	0.99952	0.95231	0.96707
10xMulti_23w4d	12	165	PCW23	GRCh38	cellranger-arc-1.0.0	6885	60731	6605	21376	0.86394	0.0179	0.76354	0.31239	0.38517	0.36777	50532.1	7290	0.02046	58475	0.48475	0.90432	0.95874	0.95683	0.9466	347913800	8.15118	0.02951	0.98318	0.82536	23813.8	3188	1778	0.57382	0.97164	0.97362	0.93758	0.21267	0.31545	0.92315	0.05422	0.55348	0.64852	0.95994	0.08053	163958037	29561	0.99953	0.95336	0.88377
[truncated: 1 more columns]
