# Supplementary material for: Single Cell Multiome Atlas of the Human Developing Retina
Source: Research Square preprint supplement (doi:10.21203/rs.3.rs-3417373/v1), 2023-10-11
Supplement: Supplementary file 2 [file 43a5f5cba6e484e1c3715d96.xlsx]

## Sheet: Peak
	T.0_5	T.5_10	T.10_15	T.15_20	T.20_25	T.25_30	T.30_35	T.35_40	T.40_45	T.45_50	T.50_55	T.55_60	T.60_65	T.65_70	T.70_75	T.75_80	T.80_85	T.85_90	T.90_95	T.95_100
chr11:62707312_62707812	1.15651	1.15651	1.15651	1.15651	1.15651	1.15651	0.825543	0.620651	0.528581	0.108796	0.00777678	-0.601009	-0.531831	-0.896669	-1.16682	-1.16682	-1.16682	-1.16682	-1.16682	-1.16682
chr8:140511752_140512252	1.20815	1.20815	1.20815	1.20815	1.20815	1.20815	1.19062	0.550358	0.0403201	-0.0717268	-0.413911	-0.682734	-0.61909	-1.01456	-1.03803	-1.03803	-1.03803	-1.03803	-1.03803	-1.03803
chr1:11563446_11563946	1.1493	1.1493	1.1493	1.1493	1.1493	1.1493	0.950668	0.644362	0.368957	0.0149054	-0.0432368	-0.203564	-0.656458	-0.898573	-1.17881	-1.17881	-1.17881	-1.17881	-1.17881	-1.17881
chr9:33816836_33817336	1.22893	1.22893	1.22893	1.22893	1.22893	1.22893	0.93768	0.710155	0.0637598	-0.139891	-0.33399	-0.58691	-0.851242	-1.02444	-1.02478	-1.02478	-1.02478	-1.02478	-1.02478	-1.02478
chr11:85628236_85628736	1.22888	1.22888	1.22888	1.22888	1.22888	1.22888	0.74826	0.241319	0.358232	0.0274876	-0.317115	-0.236095	-0.34715	-0.806133	-1.17368	-1.17368	-1.17368	-1.17368	-1.17368	-1.17368
chr4:9691602_9692102	1.19434	1.19434	1.19434	1.19434	1.19434	1.19434	0.947891	0.691364	0.386084	-0.137368	-0.4003	-0.4334	-0.832167	-0.83135	-1.0928	-1.0928	-1.0928	-1.0928	-1.0928	-1.0928
chr7:108525989_108526489	1.20035	1.20035	1.20035	1.20035	1.20035	1.20035	0.899183	0.68209	-0.0197926	-0.134296	-0.27294	-0.103755	-0.490587	-0.775078	-1.16448	-1.16448	-1.16448	-1.16448	-1.16448	-1.16448
chr12:75390795_75391295	1.2349	1.2349	1.2349	1.2349	1.2349	1.2349	1.09348	0.540068	0.118532	-0.313957	-0.607803	-0.449969	-0.785518	-1.21329	-0.965157	-0.965157	-0.965157	-0.965157	-0.965157	-0.965157
chr17:36870568_36871068	1.16534	1.16534	1.16534	1.16534	1.16534	1.16534	0.952604	0.818089	0.307826	0.0388859	-0.257505	-0.397507	-0.930609	-1.03695	-1.08115	-1.08115	-1.08115	-1.08115	-1.08115	-1.08115
chr7:102464691_102465191	1.26609	1.26609	1.26609	1.26609	1.26609	1.26609	0.824383	0.647701	0.187983	-0.257666	-0.675712	-0.810003	-0.835077	-0.943443	-0.955783	-0.955783	-0.955783	-0.955783	-0.955783	-0.955783
chr2:79512612_79513112	1.24169	1.24169	1.24169	1.24169	1.24169	1.24169	1.02179	0.355532	0.024606	0.0685422	-0.271963	-0.636535	-0.754378	-1.01904	-1.03978	-1.03978	-1.03978	-1.03978	-1.03978	-1.03978
chr3:132722554_132723054	1.33634	1.33634	1.33634	1.33634	1.33634	1.33634	0.659532	0.251431	-0.355548	-0.0665052	-0.412152	-0.538818	-0.720071	-0.937783	-0.983022	-0.983022	-0.983022	-0.983022	-0.983022	-0.983022
chr8:37479100_37479600	1.1894	1.1894	1.1894	1.1894	1.1894	1.1894	0.961971	0.660264	0.245673	-0.00478535	-0.278386	-0.40139	-0.623088	-1.07646	-1.10337	-1.10337	-1.10337	-1.10337	-1.10337	-1.10337
chr9:96892045_96892545	1.15992	1.15992	1.15992	1.15992	1.15992	1.15992	0.813317	0.462436	0.34376	0.236418	-0.0404845	-0.151734	-0.521934	-0.737864	-1.22724	-1.22724	-1.22724	-1.22724	-1.22724	-1.22724
chr5:55994826_55995326	1.40896	1.40896	1.40896	1.40896	1.40896	1.40896	0.537668	-0.00502242	-0.532268	-0.700747	-0.807691	-0.856575	-0.754154	-0.825252	-0.751622	-0.751622	-0.751622	-0.751622	-0.751622	-0.751622
chr2:148876695_148877195	1.30117	1.30117	1.30117	1.30117	1.30117	1.30117	0.918693	0.350915	0.0331562	-0.412032	-0.82759	-0.784872	-0.615169	-0.730091	-0.956672	-0.956672	-0.956672	-0.956672	-0.956672	-0.956672
chr8:109644587_109645087	1.18691	1.18691	1.18691	1.18691	1.18691	1.18691	1.01752	0.60517	0.331948	-0.0774999	-0.266467	-0.454061	-0.631266	-1.06895	-1.09631	-1.09631	-1.09631	-1.09631	-1.09631	-1.09631
chr2:178450949_178451449	1.28373	1.28373	1.28373	1.28373	1.28373	1.28373	0.923862	0.587903	0.0736063	-0.710887	-0.91598	-0.896656	-0.945169	-0.987511	-0.805263	-0.805263	-0.805263	-0.805263	-0.805263	-0.805263
chr11:106022078_106022578	1.2403	1.2403	1.2403	1.2403	1.2403	1.2403	0.870737	0.516484	0.374515	-0.21849	-0.51796	-0.541139	-0.638356	-1.07497	-1.03544	-1.03544	-1.03544	-1.03544	-1.03544	-1.03544
chr6:70413154_70413654	1.29592	1.29592	1.29592	1.29592	1.29592	1.29592	0.877937	0.255688	0.119516	-0.137575	-0.640862	-0.658323	-1.00499	-0.899692	-0.947866	-0.947866	-0.947866	-0.947866	-0.947866	-0.947866
chr6:2765035_2765535	1.25112	1.25112	1.25112	1.25112	1.25112	1.25112	0.863209	0.590144	0.20655	-0.349574	-0.367785	-0.525067	-0.770601	-0.849679	-1.05065	-1.05065	-1.05065	-1.05065	-1.05065	-1.05065
chr19:49877761_49878261	1.25675	1.25675	1.25675	1.25675	1.25675	1.25675	0.836797	0.503342	0.156215	-0.118273	-0.402038	-0.681374	-0.718377	-0.653345	-1.07724	-1.07724	-1.07724	-1.07724	-1.07724	-1.07724
chr13:41194361_41194861	1.222	1.222	1.222	1.222	1.222	1.222	0.798758	0.566768	0.208895	-0.141383	-0.0562487	-0.292004	-0.808075	-1.01725	-1.09858	-1.09858	-1.09858	-1.09858	-1.09858	-1.09858
chr6:32178043_32178543	1.20088	1.20088	1.20088	1.20088	1.20088	1.20088	0.89945	0.536079	0.198835	0.104372	0.0238029	-0.560377	-0.896022	-0.933334	-1.09635	-1.09635	-1.09635	-1.09635	-1.09635	-1.09635
chr4:169620125_169620625	1.31495	1.31495	1.31495	1.31495	1.31495	1.31495	0.711669	0.328796	-0.00386493	-0.0185712	-0.676633	-0.831612	-1.00097	-1.00863	-0.898313	-0.898313	-0.898313	-0.898313	-0.898313	-0.898313
chr16:1940166_1940666	1.22875	1.22875	1.22875	1.22875	1.22875	1.22875	0.545293	0.56282	0.202473	0.230219	-0.106648	-0.465294	-0.647687	-0.765878	-1.15463	-1.15463	-1.15463	-1.15463	-1.15463	-1.15463
chr18:67516642_67517142	1.34547	1.34547	1.34547	1.34547	1.34547	1.34547	0.857105	0.172669	-0.263455	-0.647573	-0.455782	-0.751796	-0.758432	-0.877739	-0.891301	-0.891301	-0.891301	-0.891301	-0.891301	-0.891301
chr20:32357874_32358374	1.25117	1.25117	1.25117	1.25117	1.25117	1.25117	1.00204	0.452841	0.0600504	-0.394983	-0.250474	-0.646931	-0.600601	-0.676608	-1.0754	-1.0754	-1.0754	-1.0754	-1.0754	-1.0754
chr7:123748809_123749309	1.23536	1.23536	1.23536	1.23536	1.23536	1.23536	1.09587	0.410421	0.0615551	-0.300045	-0.247544	-0.434509	-0.696148	-0.885487	-1.06938	-1.06938	-1.06938	-1.06938	-1.06938	-1.06938
chr1:109530197_109530697	1.14915	1.14915	1.14915	1.14915	1.14915	1.14915	1.11466	0.858109	0.4315	-0.0666431	-0.586995	-0.591384	-0.721507	-0.949031	-1.06393	-1.06393	-1.06393	-1.06393	-1.06393	-1.06393
chr3:49880916_49881416	1.15944	1.15944	1.15944	1.15944	1.15944	1.15944	0.594774	0.615658	0.468399	0.307322	0.0188414	-0.211802	-0.610728	-1.09154	-1.17459	-1.17459	-1.17459	-1.17459	-1.17459	-1.17459
chr3:93979829_93980329	1.25295	1.25295	1.25295	1.25295	1.25295	1.25295	1.00512	0.807172	-0.081294	-0.551923	-0.825731	-0.926588	-0.977562	-1.00028	-0.827764	-0.827764	-0.827764	-0.827764	-0.827764	-0.827764
chr12:2305945_2306445	1.22077	1.22077	1.22077	1.22077	1.22077	1.22077	0.84506	0.501092	0.131325	-0.129982	-0.086198	-0.324227	-0.452554	-0.955771	-1.14223	-1.14223	-1.14223	-1.14223	-1.14223	-1.14223
chr6:107459384_107459884	1.27498	1.27498	1.27498	1.27498	1.27498	1.27498	0.798097	0.485818	-0.0610355	0.013627	-0.282194	-0.728387	-0.913508	-0.982622	-0.996613	-0.996613	-0.996613	-0.996613	-0.996613	-0.996613
chr5:154754931_154755431	1.38038	1.38038	1.38038	1.38038	1.38038	1.38038	0.549715	0.0178375	-0.169293	-0.381989	-0.43194	-0.778823	-0.956124	-0.774909	-0.892791	-0.892791	-0.892791	-0.892791	-0.892791	-0.892791
chr19:4742802_4743302	1.0717	1.0717	1.0717	1.0717	1.0717	1.0717	1.05277	0.552069	0.348447	0.317294	0.219652	-0.0274502	-0.474714	-0.948452	-1.24497	-1.24497	-1.24497	-1.24497	-1.24497	-1.24497
chr12:78864468_78864968	1.13422	1.13422	1.13422	1.13422	1.13422	1.13422	0.889942	0.814826	0.663678	0.0752216	-0.310781	-0.589876	-0.720069	-0.792086	-1.13936	-1.13936	-1.13936	-1.13936	-1.13936	-1.13936
chr2:101308430_101308930	1.29535	1.29535	1.29535	1.29535	1.29535	1.29535	0.78601	0.403806	-0.0747662	-0.325361	-0.270978	-0.646938	-0.495005	-0.97713	-1.02862	-1.02862	-1.02862	-1.02862	-1.02862	-1.02862
chr1:193121758_193122258	1.15938	1.15938	1.15938	1.15938	1.15938	1.15938	0.909551	0.920102	0.261129	0.144062	-0.286853	-0.623473	-0.699564	-1.05138	-1.08831	-1.08831	-1.08831	-1.08831	-1.08831	-1.08831
chr2:25177070_25177570	1.22529	1.22529	1.22529	1.22529	1.22529	1.22529	1.13684	0.521569	0.0796647	-0.128579	-0.406823	-0.747402	-0.76333	-1.10026	-0.990568	-0.990568	-0.990568	-0.990568	-0.990568	-0.990568
chr5:37249159_37249659	1.25411	1.25411	1.25411	1.25411	1.25411	1.25411	1.00406	0.568811	-0.0269436	-0.265231	-0.479661	-0.556152	-0.737558	-1.11015	-0.986972	-0.986972	-0.986972	-0.986972	-0.986972	-0.986972
chr8:21696876_21697376	1.15436	1.15436	1.15436	1.15436	1.15436	1.15436	1.04206	0.871945	0.342091	-0.210614	-0.324814	-0.279333	-0.942962	-0.854401	-1.09502	-1.09502	-1.09502	-1.09502	-1.09502	-1.09502
chr2:156327810_156328310	1.01022	1.01022	1.01022	1.01022	1.01022	1.01022	0.888064	0.839589	0.475726	0.457801	0.202968	-0.0799985	-0.212995	-0.810308	-1.30369	-1.30369	-1.30369	-1.30369	-1.30369	-1.30369
chr2:236754198_236754698	1.05617	1.05617	1.05617	1.05617	1.05617	1.05617	0.86121	1.02793	0.654876	0.31977	-0.0870132	-0.379821	-0.727766	-0.798407	-1.2013	-1.2013	-1.2013	-1.2013	-1.2013	-1.2013
chr8:63968196_63968696	1.22019	1.22019	1.22019	1.22019	1.22019	1.22019	0.907062	0.338653	0.338653	0.0110576	-0.224757	-0.329389	-0.738322	-1.01455	-1.1016	-1.1016	-1.1016	-1.1016	-1.1016	-1.1016
chr13:45464610_45465110	1.24586	1.24586	1.24586	1.24586	1.24586	1.24586	0.926341	0.357099	0.0577083	-0.144894	-0.149433	-0.295609	-0.726094	-1.01351	-1.08112	-1.08112	-1.08112	-1.08112	-1.08112	-1.08112
chr10:73811683_73812183	1.13129	1.13129	1.13129	1.13129	1.13129	1.13129	0.873188	0.734754	0.613431	0.227775	-0.338672	-0.386644	-0.634256	-0.899229	-1.16301	-1.16301	-1.16301	-1.16301	-1.16301	-1.16301
chr3:4868306_4868806	1.25312	1.25312	1.25312	1.25312	1.25312	1.25312	1.03867	0.67762	-0.220111	-0.342378	-0.487897	-0.75633	-1.29506	-0.983501	-0.858288	-0.858288	-0.858288	-0.858288	-0.858288	-0.858288
chr12:14257804_14258304	1.25167	1.25167	1.25167	1.25167	1.25167	1.25167	0.872044	0.417963	0.269422	-0.0503681	-0.563192	-0.574096	-0.669466	-0.796588	-1.06928	-1.06928	-1.06928	-1.06928	-1.06928	-1.06928
chr11:35826912_35827412	1.17145	1.17145	1.17145	1.17145	1.17145	1.17145	0.594926	0.605723	0.583764	0.217128	-0.0919054	-0.327856	-0.637627	-0.923784	-1.17485	-1.17485	-1.17485	-1.17485	-1.17485	-1.17485
chr2:233063857_233064357	1.14595	1.14595	1.14595	1.14595	1.14595	1.14595	0.891554	0.717922	0.507447	0.0540002	-0.255587	-0.210395	-0.67271	-0.914127	-1.16564	-1.16564	-1.16564	-1.16564	-1.16564	-1.16564
chr18:55322164_55322664	1.23285	1.23285	1.23285	1.23285	1.23285	1.23285	1.02609	0.632804	0.109442	-0.385977	-0.390576	-0.529438	-0.770934	-0.784107	-1.05073	-1.05073	-1.05073	-1.05073	-1.05073	-1.05073
chr3:183447275_183447775	1.24724	1.24724	1.24724	1.24724	1.24724	1.24724	1.13203	0.498569	-0.180422	-0.323856	-0.515175	-0.429381	-0.57059	-0.84508	-1.04159	-1.04159	-1.04159	-1.04159	-1.04159	-1.04159
chr7:7182282_7182782	1.29366	1.29366	1.29366	1.29366	1.29366	1.29366	0.831495	0.329369	0.288471	-0.461612	-0.50553	-0.768407	-0.818291	-0.837196	-0.970046	-0.970046	-0.970046	-0.970046	-0.970046	-0.970046
chr12:50025298_50025798	1.3472	1.3472	1.3472	1.3472	1.3472	1.3472	0.77981	0.143092	-0.290759	-0.323291	-0.660475	-0.877767	-0.496577	-0.670696	-0.94776	-0.94776	-0.94776	-0.94776	-0.94776	-0.94776
chr11:47426293_47426793	1.2276	1.2276	1.2276	1.2276	1.2276	1.2276	0.580746	0.370682	-0.202782	-0.00287266	0.0938241	0.0481924	-0.326725	-0.586093	-1.22343	-1.22343	-1.22343	-1.22343	-1.22343	-1.22343
chr11:34284971_34285471	1.10097	1.10097	1.10097	1.10097	1.10097	1.10097	1.04861	0.650228	0.758894	0.217145	-0.469309	-0.422166	-0.560773	-0.805936	-1.17042	-1.17042	-1.17042	-1.17042	-1.17042	-1.17042
chr19:34733940_34734440	1.30698	1.30698	1.30698	1.30698	1.30698	1.30698	0.664215	0.297786	0.240407	-0.40177	-0.367348	-0.508074	-0.757049	-0.886655	-1.02057	-1.02057	-1.02057	-1.02057	-1.02057	-1.02057
chr8:54022158_54022658	1.14535	1.14535	1.14535	1.14535	1.14535	1.14535	0.756768	0.159682	0.410174	0.409622	0.196619	-0.0222982	-0.465125	-0.9688	-1.22479	-1.22479	-1.22479	-1.22479	-1.22479	-1.22479
chr1:208098660_208099160	1.12487	1.12487	1.12487	1.12487	1.12487	1.12487	1.02627	0.74894	0.527027	0.180449	-0.180644	-0.646469	-0.67652	-0.911959	-1.13605	-1.13605	-1.13605	-1.13605	-1.13605	-1.13605
chr7:149771570_149772070	1.30448	1.30448	1.30448	1.30448	1.30448	1.30448	0.884502	0.488071	-0.173518	-0.480712	-0.723958	-0.874726	-1.12688	-1.13951	-0.780025	-0.780025	-0.780025	-0.780025	-0.780025	-0.780025
chr1:150213496_150213996	1.24145	1.24145	1.24145	1.24145	1.24145	1.24145	1.03974	0.574295	0.0984572	-0.282551	-0.651972	-0.604658	-0.7418	-0.625579	-1.04244	-1.04244	-1.04244	-1.04244	-1.04244	-1.04244
chr11:77066597_77067097	1.19343	1.19343	1.19343	1.19343	1.19343	1.19343	0.583724	0.809438	0.381049	0.218984	-0.353658	-0.443146	-0.701898	-0.832063	-1.13717	-1.13717	-1.13717	-1.13717	-1.13717	-1.13717
chr11:108222633_108223133	1.27501	1.27501	1.27501	1.27501	1.27501	1.27501	1.06062	0.514721	-0.287706	-0.331818	-0.597253	-0.649333	-0.614851	-0.87708	-0.977895	-0.977895	-0.977895	-0.977895	-0.977895	-0.977895
chr11:31106252_31106752	1.22379	1.22379	1.22379	1.22379	1.22379	1.22379	0.754201	0.520682	0.297612	0.0679349	-0.354969	-0.450344	-0.530229	-0.777464	-1.14503	-1.14503	-1.14503	-1.14503	-1.14503	-1.14503
chr3:12507836_12508336	1.24845	1.24845	1.24845	1.24845	1.24845	1.24845	0.741073	0.741073	-0.0749987	-0.103714	-0.370079	-0.341399	-0.787517	-0.821111	-1.07901	-1.07901	-1.07901	-1.07901	-1.07901	-1.07901
chr7:76201562_76202062	1.31335	1.31335	1.31335	1.31335	1.31335	1.31335	0.66286	0.0148414	-0.0268788	0.0296426	-0.0988423	-0.500218	-0.881641	-1.11044	-0.994909	-0.994909	-0.994909	-0.994909	-0.994909	-0.994909
chr15:52976448_52976948	1.02536	1.02536	1.02536	1.02536	1.02536	1.02536	0.906822	1.00034	0.599374	0.31602	0.0212667	-0.176447	-0.439881	-0.834545	-1.25752	-1.25752	-1.25752	-1.25752	-1.25752	-1.25752
chr3:138834690_138835190	1.30841	1.30841	1.30841	1.30841	1.30841	1.30841	0.793942	0.612337	-0.215139	-0.58356	-1.11978	-1.09762	-0.727821	-0.86061	-0.775369	-0.775369	-0.775369	-0.775369	-0.775369	-0.775369
chr3:4493013_4493513	1.23229	1.23229	1.23229	1.23229	1.23229	1.23229	1.08542	0.371567	0.139264	-0.073725	-0.601739	-0.606584	-0.59347	-0.567939	-1.09109	-1.09109	-1.09109	-1.09109	-1.09109	-1.09109
chr17:16417974_16418474	1.12746	1.12746	1.12746	1.12746	1.12746	1.12746	1.00783	0.790903	0.475099	-0.121318	-0.25174	-0.34894	-0.430354	-0.676675	-1.2016	-1.2016	-1.2016	-1.2016	-1.2016	-1.2016
chr7:155339501_155340001	1.31675	1.31675	1.31675	1.31675	1.31675	1.31675	0.401648	0.412976	0.19254	-0.102848	-0.48246	-0.549392	-0.634982	-1.04722	-1.01513	-1.01513	-1.01513	-1.01513	-1.01513	-1.01513
chr9:107358866_107359366	1.06982	1.06982	1.06982	1.06982	1.06982	1.06982	0.872589	0.392446	0.349784	0.349784	0.392051	0.0364393	-0.274415	-0.688259	-1.30823	-1.30823	-1.30823	-1.30823	-1.30823	-1.30823
chr4:48341039_48341539	1.24485	1.24485	1.24485	1.24485	1.24485	1.24485	0.789976	0.494002	0.247985	-0.259595	-0.137886	-0.405107	-0.704153	-1.02296	-1.07856	-1.07856	-1.07856	-1.07856	-1.07856	-1.07856
chr19:35141070_35141570	1.2188	1.2188	1.2188	1.2188	1.2188	1.2188	1.0987	0.623604	0.0506474	-0.0382346	-0.549942	-0.92303	-0.815319	-0.617771	-1.02358	-1.02358	-1.02358	-1.02358	-1.02358	-1.02358
chr20:5610833_5611333	1.14855	1.14855	1.14855	1.14855	1.14855	1.14855	0.807661	0.502206	0.663927	0.294325	-0.0757796	-0.460474	-0.83593	-0.861287	-1.15432	-1.15432	-1.15432	-1.15432	-1.15432	-1.15432
chr2:74833780_74834280	1.25679	1.25679	1.25679	1.25679	1.25679	1.25679	0.984042	0.509281	-0.0666622	-0.32437	-0.651256	-1.18577	-1.5	-0.872374	-0.731721	-0.731721	-0.731721	-0.731721	-0.731721	-0.731721
chr12:25250837_25251337	1.28545	1.28545	1.28545	1.28545	1.28545	1.28545	0.796991	0.245675	0.128338	-0.261005	-0.206579	-0.397506	-0.802625	-0.89308	-1.05381	-1.05381	-1.05381	-1.05381	-1.05381	-1.05381
chr7:36946086_36946586	0.996096	0.996096	0.996096	0.996096	0.996096	0.996096	0.885904	0.814627	0.814627	0.575638	0.13559	-0.224826	-0.555513	-0.923286	-1.24989	-1.24989	-1.24989	-1.24989	-1.24989	-1.24989
chr4:8747628_8748128	0.96952	0.96952	0.96952	0.96952	0.96952	0.96952	0.896904	0.385565	0.723138	0.548138	0.664026	0.167799	-0.490088	-1.08373	-1.27148	-1.27148	-1.27148	-1.27148	-1.27148	-1.27148
chr6:24720969_24721469	1.29259	1.29259	1.29259	1.29259	1.29259	1.29259	0.956139	0.347598	-0.0912242	-0.243491	-0.640765	-1.09214	-1.24351	-0.871052	-0.812844	-0.812844	-0.812844	-0.812844	-0.812844	-0.812844
chr19:34359190_34359690	1.13831	1.13831	1.13831	1.13831	1.13831	1.13831	0.798208	0.567928	0.468818	-0.0501834	0.225321	-0.0457269	-0.798809	-0.707763	-1.21461	-1.21461	-1.21461	-1.21461	-1.21461	-1.21461
chr17:18857780_18858280	1.26307	1.26307	1.26307	1.26307	1.26307	1.26307	0.592096	0.547034	0.036382	-0.13872	-0.254216	-0.224359	-0.582727	-0.718981	-1.13916	-1.13916	-1.13916	-1.13916	-1.13916	-1.13916
chr3:141876321_141876821	1.26949	1.26949	1.26949	1.26949	1.26949	1.26949	0.351772	0.45249	0.353278	0.134551	-0.13689	-0.511366	-0.842855	-0.979031	-1.07315	-1.07315	-1.07315	-1.07315	-1.07315	-1.07315
chr2:233429534_233430034	1.19739	1.19739	1.19739	1.19739	1.19739	1.19739	1.19739	0.849564	0.0301218	-0.411274	-0.491209	-0.90544	-0.852891	-0.716966	-0.980602	-0.980602	-0.980602	-0.980602	-0.980602	-0.980602
chr10:44959436_44959936	1.3439	1.3439	1.3439	1.3439	1.3439	1.3439	0.823963	0.206295	-0.200303	-0.653687	-0.584842	-1.00308	-0.942774	-1.08009	-0.77148	-0.77148	-0.77148	-0.77148	-0.77148	-0.77148
chr6:46170919_46171419	1.08023	1.08023	1.08023	1.08023	1.08023	1.08023	1.02486	1.03648	0.63816	0.151209	-0.277211	-0.545236	-1.04171	-0.944639	-1.08722	-1.08722	-1.08722	-1.08722	-1.08722	-1.08722
chr1:44312724_44313224	1.16808	1.16808	1.16808	1.16808	1.16808	1.16808	0.675155	0.525113	0.501465	0.224962	-0.048206	-0.243608	-0.517443	-1.03851	-1.18124	-1.18124	-1.18124	-1.18124	-1.18124	-1.18124
chr3:12663985_12664485	1.33185	1.33185	1.33185	1.33185	1.33185	1.33185	0.71808	0.237087	-0.163106	-0.247139	-0.504658	-0.398905	-0.914592	-0.971002	-0.95781	-0.95781	-0.95781	-0.95781	-0.95781	-0.95781
chr22:27919103_27919603	1.03649	1.03649	1.03649	1.03649	1.03649	1.03649	0.96647	0.904267	0.428554	0.132522	0.0753498	0.0614044	-0.228944	-0.96867	-1.26498	-1.26498	-1.26498	-1.26498	-1.26498	-1.26498
chr7:108358551_108359051	0.996597	0.996597	0.996597	0.996597	0.996597	0.996597	0.862033	0.962337	0.635354	0.339267	0.17025	0.0106026	-0.381996	-0.846505	-1.28849	-1.28849	-1.28849	-1.28849	-1.28849	-1.28849
chr15:78149047_78149547	1.18712	1.18712	1.18712	1.18712	1.18712	1.18712	0.84611	0.50195	0.412977	0.0450715	-0.386374	-0.2009	-0.501737	-0.724857	-1.18583	-1.18583	-1.18583	-1.18583	-1.18583	-1.18583
chr4:186348396_186348896	0.992591	0.992591	0.992591	0.992591	0.992591	0.992591	0.639979	0.900913	0.757146	0.672755	0.122734	-0.18981	-0.264886	-0.847912	-1.29108	-1.29108	-1.29108	-1.29108	-1.29108	-1.29108
chr7:65081103_65081603	1.29235	1.29235	1.29235	1.29235	1.29235	1.29235	0.939278	0.37777	0.0527586	-0.34573	-0.681612	-0.767006	-1.09534	-1.04256	-0.865274	-0.865274	-0.865274	-0.865274	-0.865274	-0.865274
chr2:74374453_74374953	1.28448	1.28448	1.28448	1.28448	1.28448	1.28448	0.38256	0.8332	0.245166	-0.154198	-0.754533	-0.894235	-0.932489	-1.07119	-0.893522	-0.893522	-0.893522	-0.893522	-0.893522	-0.893522
chr19:12440892_12441392	1.31602	1.31602	1.31602	1.31602	1.31602	1.31602	0.827824	0.080957	-0.0521648	-0.296238	-0.466451	-0.41395	-0.668165	-1.37273	-0.922535	-0.922535	-0.922535	-0.922535	-0.922535	-0.922535
chr19:40806794_40807294	1.24444	1.24444	1.24444	1.24444	1.24444	1.24444	1.01223	0.586304	-0.00302978	-0.185698	-0.580675	-0.650317	-0.521466	-0.876774	-1.0412	-1.0412	-1.0412	-1.0412	-1.0412	-1.0412
chr17:41786540_41787040	1.32491	1.32491	1.32491	1.32491	1.32491	1.32491	0.894513	0.144736	-0.0964498	-0.404585	-0.625644	-0.51856	-0.672053	-0.900484	-0.961826	-0.961826	-0.961826	-0.961826	-0.961826	-0.961826
chr3:114056370_114056870	1.1859	1.1859	1.1859	1.1859	1.1859	1.1859	0.656542	0.623663	0.599617	0.146478	-0.417276	-0.397121	-0.54722	-0.845741	-1.15573	-1.15573	-1.15573	-1.15573	-1.15573	-1.15573
chr2:25878289_25878789	1.10178	1.10178	1.10178	1.10178	1.10178	1.10178	1.00637	0.967195	0.132123	-0.0512506	-0.389915	-0.161287	-0.0620932	-0.6393	-1.23542	-1.23542	-1.23542	-1.23542	-1.23542	-1.23542
chr17:1997796_1998296	0.975637	0.975637	0.975637	0.975637	0.975637	0.975637	0.829417	0.925687	0.465246	0.604738	0.17924	0.079606	-0.265393	-0.72458	-1.32463	-1.32463	-1.32463	-1.32463	-1.32463	-1.32463
chr17:38568464_38568964	0.998136	0.998136	0.998136	0.998136	0.998136	0.998136	0.711934	0.965336	0.538912	0.667761	0.213584	0.0136683	-0.545852	-1.01466	-1.25658	-1.25658	-1.25658	-1.25658	-1.25658	-1.25658
chr13:110705927_110706427	1.28055	1.28055	1.28055	1.28055	1.28055	1.28055	0.926958	0.0782917	0.210795	-0.111479	-0.264415	-0.735367	-1.16857	-0.8957	-0.953971	-0.953971	-0.953971	-0.953971	-0.953971	-0.953971
chr1:113390153_113390653	1.12191	1.12191	1.12191	1.12191	1.12191	1.12191	1.04671	0.705464	0.602849	-0.0204341	-0.179266	-0.404273	-0.711611	-0.737359	-1.17226	-1.17226	-1.17226	-1.17226	-1.17226	-1.17226
chr3:170356678_170357178	1.39032	1.39032	1.39032	1.39032	1.39032	1.39032	0.594779	0.0265868	-0.291653	-0.725659	-1.06302	-0.681907	-0.933234	-0.822878	-0.740822	-0.740822	-0.740822	-0.740822	-0.740822	-0.740822
chr4:3726453_3726953	1.2782	1.2782	1.2782	1.2782	1.2782	1.2782	0.780865	0.274578	0.0330874	0.00203961	-0.146756	-0.625272	-0.776593	-0.79116	-1.07	-1.07	-1.07	-1.07	-1.07	-1.07
chr10:97852675_97853175	1.1706	1.1706	1.1706	1.1706	1.1706	1.1706	0.355297	0.458204	0.714636	0.358069	-0.0437838	-0.114638	-0.77564	-0.848126	-1.18793	-1.18793	-1.18793	-1.18793	-1.18793	-1.18793
chr3:178677234_178677734	1.24714	1.24714	1.24714	1.24714	1.24714	1.24714	0.966663	0.0994391	0.139025	0.00824922	-0.103878	-0.479632	-0.629121	-0.82958	-1.109	-1.109	-1.109	-1.109	-1.109	-1.109
chr20:35616756_35617256	1.23366	1.23366	1.23366	1.23366	1.23366	1.23366	0.802903	0.609891	0.0295811	-0.152766	-0.115103	-0.266925	-0.727018	-1.05435	-1.08803	-1.08803	-1.08803	-1.08803	-1.08803	-1.08803
chr17:29048435_29048935	1.15665	1.15665	1.15665	1.15665	1.15665	1.15665	0.794646	0.639383	0.40525	0.274304	-0.339884	-0.220972	-0.436844	-0.911017	-1.1908	-1.1908	-1.1908	-1.1908	-1.1908	-1.1908
chr4:102827868_102828368	1.1274	1.1274	1.1274	1.1274	1.1274	1.1274	0.912507	0.808349	-0.0414002	-0.107889	0.11841	0.00476177	-0.304887	-0.685012	-1.24487	-1.24487	-1.24487	-1.24487	-1.24487	-1.24487
chr16:28211869_28212369	1.22843	1.22843	1.22843	1.22843	1.22843	1.22843	0.633032	0.677842	0.574375	-0.201147	-0.727616	-1.12158	-1.36641	-1.23773	-0.766893	-0.766893	-0.766893	-0.766893	-0.766893	-0.766893
chr8:22588990_22589490	1.17667	1.17667	1.17667	1.17667	1.17667	1.17667	1.03792	0.5682	0.136181	0.327493	-0.186494	-0.568659	-0.914441	-0.929082	-1.08852	-1.08852	-1.08852	-1.08852	-1.08852	-1.08852
chr2:157876158_157876658	1.31229	1.31229	1.31229	1.31229	1.31229	1.31229	0.89188	0.217404	-0.188984	-0.774148	-0.474691	-0.38239	-0.306265	-0.895212	-0.993554	-0.993554	-0.993554	-0.993554	-0.993554	-0.993554
chr19:46634185_46634685	0.991585	0.991585	0.991585	0.991585	0.991585	0.991585	0.644989	0.748701	0.9187	0.667541	0.324573	-0.188326	-0.535069	-1.12007	-1.23509	-1.23509	-1.23509	-1.23509	-1.23509	-1.23509
chr7:12211043_12211543	1.28323	1.28323	1.28323	1.28323	1.28323	1.28323	0.929055	0.490661	-0.0151868	-0.474698	-0.708562	-0.613172	-0.498632	-0.78542	-1.0039	-1.0039	-1.0039	-1.0039	-1.0039	-1.0039
chr7:157819180_157819680	1.24859	1.24859	1.24859	1.24859	1.24859	1.24859	0.887296	0.37636	0.239501	0.0220305	-0.439999	-0.558487	-0.709036	-0.916852	-1.0654	-1.0654	-1.0654	-1.0654	-1.0654	-1.0654
chr12:108562251_108562751	1.12736	1.12736	1.12736	1.12736	1.12736	1.12736	0.831623	0.859699	0.425558	0.203956	-0.373536	-0.449448	-0.256265	-0.776053	-1.20495	-1.20495	-1.20495	-1.20495	-1.20495	-1.20495
chr9:127771209_127771709	1.34134	1.34134	1.34134	1.34134	1.34134	1.34134	0.423191	0.0425604	-0.277345	-0.333656	-0.554687	-0.18129	-0.211655	-0.313386	-1.10696	-1.10696	-1.10696	-1.10696	-1.10696	-1.10696
chr15:41774269_41774769	1.11273	1.11273	1.11273	1.11273	1.11273	1.11273	0.755613	0.945258	0.612504	-0.108827	-0.478056	-0.248694	-0.160291	-0.656983	-1.22282	-1.22282	-1.22282	-1.22282	-1.22282	-1.22282
chr2:69387055_69387555	1.21455	1.21455	1.21455	1.21455	1.21455	1.21455	0.700193	0.721348	0.197646	0.27071	-0.298707	-0.640563	-0.920608	-0.884915	-1.07207	-1.07207	-1.07207	-1.07207	-1.07207	-1.07207
chr11:128522165_128522665	1.26799	1.26799	1.26799	1.26799	1.26799	1.26799	0.733765	0.754987	-0.0746975	-0.630776	-0.397265	-0.499494	-0.532686	-0.553792	-1.06799	-1.06799	-1.06799	-1.06799	-1.06799	-1.06799
chr7:107563714_107564214	1.20542	1.20542	1.20542	1.20542	1.20542	1.20542	1.06478	0.830012	0.0669824	-0.25794	-0.479047	-0.584238	-0.740184	-1.04865	-1.01404	-1.01404	-1.01404	-1.01404	-1.01404	-1.01404
chr8:132414135_132414635	1.22627	1.22627	1.22627	1.22627	1.22627	1.22627	1.09672	0.653305	0.0119555	-0.261562	-0.459267	-0.599854	-0.67817	-0.951042	-1.02829	-1.02829	-1.02829	-1.02829	-1.02829	-1.02829
chrX:129931448_129931948	1.10087	1.10087	1.10087	1.10087	1.10087	1.10087	1.00209	0.738846	0.405072	0.151067	0.0629119	-0.238145	-0.750201	-0.6513	-1.22092	-1.22092	-1.22092	-1.22092	-1.22092	-1.22092
chr2:85327766_85328266	1.1457	1.1457	1.1457	1.1457	1.1457	1.1457	0.78164	1.05502	0.218015	0.259186	-0.209599	-0.605634	-0.762368	-0.95802	-1.10874	-1.10874	-1.10874	-1.10874	-1.10874	-1.10874
chr14:77660825_77661325	1.17611	1.17611	1.17611	1.17611	1.17611	1.17611	1.03338	0.61998	-0.154344	-0.33908	-0.23336	0.0983114	-0.240571	-0.701365	-1.18993	-1.18993	-1.18993	-1.18993	-1.18993	-1.18993
chr3:184692908_184693408	1.34567	1.34567	1.34567	1.34567	1.34567	1.34567	0.605695	0.317602	-0.0997304	-0.263306	-0.701268	-1.01129	-0.996844	-1.08216	-0.807123	-0.807123	-0.807123	-0.807123	-0.807123	-0.807123
chr12:110583139_110583639	1.2603	1.2603	1.2603	1.2603	1.2603	1.2603	0.965877	0.181124	-0.450883	-0.329006	0.0404111	-0.180043	-0.519928	-0.49935	-1.12834	-1.12834	-1.12834	-1.12834	-1.12834	-1.12834
chr2:219529983_219530483	1.04465	1.04465	1.04465	1.04465	1.04465	1.04465	0.90581	0.592401	0.511533	0.394118	0.345101	0.0823893	-0.554655	-1.23273	-1.21865	-1.21865	-1.21865	-1.21865	-1.21865	-1.21865
chr3:131381423_131381923	1.3022	1.3022	1.3022	1.3022	1.3022	1.3022	1.21346	0.0955698	-0.60719	-0.667119	-0.920064	-1.05526	-1.04896	-1.04272	-0.630156	-0.630156	-0.630156	-0.630156	-0.630156	-0.630156
chr12:98593333_98593833	1.2935	1.2935	1.2935	1.2935	1.2935	1.2935	1.0353	0.554931	-0.489135	-0.834787	-0.550749	-0.651977	-0.979201	-0.578337	-0.877837	-0.877837	-0.877837	-0.877837	-0.877837	-0.877837
chr21:31334724_31335224	1.17176	1.17176	1.17176	1.17176	1.17176	1.17176	0.954882	0.502994	0.37498	0.416911	-0.221421	-0.720427	-0.944785	-1.15953	-1.03903	-1.03903	-1.03903	-1.03903	-1.03903	-1.03903
chrX:136496868_136497368	1.2391	1.2391	1.2391	1.2391	1.2391	1.2391	0.946917	0.418397	0.174805	-0.227624	-0.469827	-0.327479	-0.483209	-0.762613	-1.11733	-1.11733	-1.11733	-1.11733	-1.11733	-1.11733
chr3:156674245_156674745	1.34314	1.34314	1.34314	1.34314	1.34314	1.34314	0.633351	-0.208516	-0.372454	-0.669232	0.0439823	-0.159935	-0.326207	-0.90207	-1.01629	-1.01629	-1.01629	-1.01629	-1.01629	-1.01629
chr10:71212275_71212775	1.27882	1.27882	1.27882	1.27882	1.27882	1.27882	0.608363	0.534161	0.130262	-0.0643284	-0.507871	-0.41444	-0.721519	-0.775748	-1.07697	-1.07697	-1.07697	-1.07697	-1.07697	-1.07697
chr19:19776326_19776826	1.23578	1.23578	1.23578	1.23578	1.23578	1.23578	0.865721	0.304121	0.672743	-0.119599	-0.55191	-0.925605	-1.08873	-1.0425	-0.921484	-0.921484	-0.921484	-0.921484	-0.921484	-0.921484
chr8:37453170_37453670	1.13342	1.13342	1.13342	1.13342	1.13342	1.13342	0.840182	0.548246	0.20029	0.179066	0.0436764	-0.0305544	-0.186846	-0.894086	-1.25009	-1.25009	-1.25009	-1.25009	-1.25009	-1.25009
chr3:8501467_8501967	1.2983	1.2983	1.2983	1.2983	1.2983	1.2983	0.931896	0.263393	-0.187132	-0.498504	-0.562433	-0.114638	-1.03152	-1.17954	-0.901884	-0.901884	-0.901884	-0.901884	-0.901884	-0.901884
chr10:128153141_128153641	1.17028	1.17028	1.17028	1.17028	1.17028	1.17028	0.952064	0.575132	0.232305	0.0319238	-0.00472673	-0.279697	-0.679953	-0.763375	-1.1809	-1.1809	-1.1809	-1.1809	-1.1809	-1.1809
chr3:119702755_119703255	1.34716	1.34716	1.34716	1.34716	1.34716	1.34716	0.852913	-0.0558225	-0.0384797	-0.566357	-0.809982	-0.7203	-1.24191	-0.898265	-0.767462	-0.767462	-0.767462	-0.767462	-0.767462	-0.767462
chr2:54455911_54456411	1.29695	1.29695	1.29695	1.29695	1.29695	1.29695	0.773348	0.0680298	0.237685	-0.246181	-0.130884	-0.709178	-1.26699	-1.03392	-0.912268	-0.912268	-0.912268	-0.912268	-0.912268	-0.912268
chr8:51898933_51899433	1.31794	1.31794	1.31794	1.31794	1.31794	1.31794	0.646894	0.311015	-0.160706	-0.392023	-0.494971	-0.136805	-0.665246	-0.648949	-1.06114	-1.06114	-1.06114	-1.06114	-1.06114	-1.06114
chr4:120066661_120067161	1.32672	1.32672	1.32672	1.32672	1.32672	1.32672	0.865913	0.240994	-0.106373	-0.587351	-0.705408	-0.47768	-0.63918	-0.847555	-0.950614	-0.950614	-0.950614	-0.950614	-0.950614	-0.950614
chr19:56477172_56477672	1.25935	1.25935	1.25935	1.25935	1.25935	1.25935	0.680189	0.54701	0.112873	0.075182	-0.339671	-0.482803	-0.927936	-0.834042	-1.06448	-1.06448	-1.06448	-1.06448	-1.06448	-1.06448
chr2:24076281_24076781	1.31061	1.31061	1.31061	1.31061	1.31061	1.31061	0.938294	0.353056	-0.240957	-0.542536	-0.604698	-0.493495	-0.706467	-1.17873	-0.898021	-0.898021	-0.898021	-0.898021	-0.898021	-0.898021
chr8:26383390_26383890	1.23457	1.23457	1.23457	1.23457	1.23457	1.23457	1.01397	0.337411	0.315147	-0.388822	-0.0587434	-0.648983	-0.813575	-0.828153	-1.05595	-1.05595	-1.05595	-1.05595	-1.05595	-1.05595
chr7:106284850_106285350	1.05927	1.05927	1.05927	1.05927	1.05927	1.05927	0.998618	0.744749	0.479349	0.535166	0.136262	-0.322354	-0.985656	-0.848579	-1.1822	-1.1822	-1.1822	-1.1822	-1.1822	-1.1822
chr6:4135519_4136019	1.26281	1.26281	1.26281	1.26281	1.26281	1.26281	0.541275	0.570783	-0.0761872	-0.485386	0.0685302	-0.0430903	-0.555563	-1.1825	-1.06912	-1.06912	-1.06912	-1.06912	-1.06912	-1.06912
chr7:75994433_75994933	1.27128	1.27128	1.27128	1.27128	1.27128	1.27128	0.588924	0.697079	-0.0238405	-0.217645	-0.199166	-0.475694	-0.642264	-0.934801	-1.07005	-1.07005	-1.07005	-1.07005	-1.07005	-1.07005
chr3:32106289_32106789	1.32139	1.32139	1.32139	1.32139	1.32139	1.32139	0.558075	0.374404	-0.177687	-0.399342	-1.10684	-1.25876	-1.363	-1.11295	-0.573707	-0.573707	-0.573707	-0.573707	-0.573707	-0.573707
chr11:76860526_76861026	1.32262	1.32262	1.32262	1.32262	1.32262	1.32262	0.760653	0.366353	-0.186289	-0.285598	-0.470737	-0.721068	-0.729476	-0.753034	-0.986089	-0.986089	-0.986089	-0.986089	-0.986089	-0.986089
chr4:39527438_39527938	1.33495	1.33495	1.33495	1.33495	1.33495	1.33495	0.201328	0.0905314	0.425617	0.165136	-0.623946	-0.887594	-1.00116	-0.690769	-0.948135	-0.948135	-0.948135	-0.948135	-0.948135	-0.948135
chr12:122974432_122974932	1.1326	1.1326	1.1326	1.1326	1.1326	1.1326	0.949185	0.742125	0.477377	0.0961251	-0.290543	-0.277501	-0.510142	-0.861652	-1.18676	-1.18676	-1.18676	-1.18676	-1.18676	-1.18676
chr11:31060920_31061420	1.05853	1.05853	1.05853	1.05853	1.05853	1.05853	1.05853	0.979227	0.725017	0.187449	-0.0606485	-0.722887	-0.882406	-1.14621	-1.08154	-1.08154	-1.08154	-1.08154	-1.08154	-1.08154
chr16:20291768_20292268	1.22997	1.22997	1.22997	1.22997	1.22997	1.22997	0.777355	0.479383	0.311494	0.22816	-0.373647	-0.682852	-0.764997	-0.915762	-1.07316	-1.07316	-1.07316	-1.07316	-1.07316	-1.07316
chr12:30926191_30926691	1.21325	1.21325	1.21325	1.21325	1.21325	1.21325	0.990836	0.898788	-0.144879	-0.101878	-0.468945	-0.66408	-0.823621	-0.739498	-1.03771	-1.03771	-1.03771	-1.03771	-1.03771	-1.03771
chr17:8138774_8139274	1.26553	1.26553	1.26553	1.26553	1.26553	1.26553	0.881633	0.802115	-0.131464	-0.385051	-1.09232	-0.705155	-0.74698	-1.06458	-0.858559	-0.858559	-0.858559	-0.858559	-0.858559	-0.858559
chr3:58332671_58333171	1.31149	1.31149	1.31149	1.31149	1.31149	1.31149	0.601118	0.601118	-0.0418239	-0.424169	-0.610109	-0.623146	-0.564947	-0.716132	-1.01514	-1.01514	-1.01514	-1.01514	-1.01514	-1.01514
chr22:18967641_18968141	1.11091	1.11091	1.11091	1.11091	1.11091	1.11091	0.802588	0.734052	0.5761	0.302637	-0.369859	-0.408688	-0.203721	-0.672286	-1.23771	-1.23771	-1.23771	-1.23771	-1.23771	-1.23771
chr19:8832665_8833165	1.17907	1.17907	1.17907	1.17907	1.17907	1.17907	0.467224	0.570956	0.360264	0.564395	0.0564175	-0.446742	-0.989021	-1.39755	-1.0434	-1.0434	-1.0434	-1.0434	-1.0434	-1.0434
chr3:157105278_157105778	1.33115	1.33115	1.33115	1.33115	1.33115	1.33115	0.712078	0.118549	0.0702064	-0.265812	-0.568556	-0.785115	-0.482926	-0.833751	-0.991928	-0.991928	-0.991928	-0.991928	-0.991928	-0.991928
chr2:60755955_60756455	1.25811	1.25811	1.25811	1.25811	1.25811	1.25811	0.870373	0.598688	0.126074	-0.200384	-0.449729	-0.686573	-1.04715	-1.13259	-0.937899	-0.937899	-0.937899	-0.937899	-0.937899	-0.937899
chr4:98261070_98261570	1.33767	1.33767	1.33767	1.33767	1.33767	1.33767	0.887584	0.157122	-0.429858	-0.653871	-0.468519	-0.728113	-1.28317	-1.09391	-0.735548	-0.735548	-0.735548	-0.735548	-0.735548	-0.735548
chr6:143843009_143843509	1.22003	1.22003	1.22003	1.22003	1.22003	1.22003	0.836386	0.33209	0.403565	-0.0358222	-0.286173	-0.5516	-0.248169	-0.973931	-1.13276	-1.13276	-1.13276	-1.13276	-1.13276	-1.13276
chr3:49094118_49094618	1.18404	1.18404	1.18404	1.18404	1.18404	1.18404	0.616095	0.728892	0.123976	-0.0937619	-0.550855	-0.0546401	-0.0395584	-0.415851	-1.23642	-1.23642	-1.23642	-1.23642	-1.23642	-1.23642
chr1:43564637_43565137	1.00241	1.00241	1.00241	1.00241	1.00241	1.00241	0.89117	0.590949	0.640056	0.232722	-0.0302986	0.253292	0.133438	-0.658272	-1.34459	-1.34459	-1.34459	-1.34459	-1.34459	-1.34459
chr8:103020769_103021269	1.27611	1.27611	1.27611	1.27611	1.27611	1.27611	0.653097	0.220664	0.136448	-0.0356812	-0.141287	-0.453997	-0.556019	-0.648228	-1.13861	-1.13861	-1.13861	-1.13861	-1.13861	-1.13861
chr18:79590588_79591088	1.24568	1.24568	1.24568	1.24568	1.24568	1.24568	0.718421	0.532156	0.00419881	0.0970926	-0.207609	-0.286233	-0.782533	-1.11	-1.07326	-1.07326	-1.07326	-1.07326	-1.07326	-1.07326
chr12:76878838_76879338	1.31916	1.31916	1.31916	1.31916	1.31916	1.31916	1.14931	-0.0918765	-0.753176	-0.954813	-0.832613	-1.25007	-0.889428	-0.861023	-0.571878	-0.571878	-0.571878	-0.571878	-0.571878	-0.571878
chr11:86955219_86955719	1.30204	1.30204	1.30204	1.30204	1.30204	1.30204	0.918565	0.319164	0.0535504	-0.58831	-0.709744	-0.696507	-0.527357	-0.680843	-0.983455	-0.983455	-0.983455	-0.983455	-0.983455	-0.983455
chr3:51304186_51304686	1.29673	1.29673	1.29673	1.29673	1.29673	1.29673	0.744975	0.272932	0.0149125	-0.155973	-0.193884	-0.546482	-0.782623	-1.19791	-0.989383	-0.989383	-0.989383	-0.989383	-0.989383	-0.989383
chr6:154733934_154734434	1.19915	1.19915	1.19915	1.19915	1.19915	1.19915	0.888779	0.351722	0.569821	0.129505	-0.351102	-0.662228	-0.830142	-0.55916	-1.12202	-1.12202	-1.12202	-1.12202	-1.12202	-1.12202
chr13:23375333_23375833	1.29224	1.29224	1.29224	1.29224	1.29224	1.29224	0.632722	0.479269	0.291038	-0.441788	-0.939375	-1.11757	-1.28945	-1.13687	-0.705239	-0.705239	-0.705239	-0.705239	-0.705239	-0.705239
chr2:241508498_241508998	1.16166	1.16166	1.16166	1.16166	1.16166	1.16166	1.10438	0.732052	0.376789	-0.134711	-0.160743	-0.583348	-1.06821	-1.0333	-1.03382	-1.03382	-1.03382	-1.03382	-1.03382	-1.03382
chr20:41366697_41367197	1.26408	1.26408	1.26408	1.26408	1.26408	1.26408	0.723227	0.332564	0.0788026	-0.0631209	-0.0509556	-0.291861	-0.905226	-0.921068	-1.08114	-1.08114	-1.08114	-1.08114	-1.08114	-1.08114
chr12:2812312_2812812	1.02335	1.02335	1.02335	1.02335	1.02335	1.02335	0.980255	0.737728	0.855988	0.653619	-0.19508	-0.373618	-0.709442	-1.01926	-1.17839	-1.17839	-1.17839	-1.17839	-1.17839	-1.17839
chr12:119877117_119877617	1.29934	1.29934	1.29934	1.29934	1.29934	1.29934	0.823661	0.432414	-0.0357445	-0.233816	-0.607632	-0.772545	-0.634842	-0.788771	-0.996465	-0.996465	-0.996465	-0.996465	-0.996465	-0.996465
chrX:108250583_108251083	1.43192	1.43192	1.43192	1.43192	1.43192	1.43192	0.376408	-0.175257	-0.739246	-0.941746	-0.756315	-0.580145	-0.615778	-0.705693	-0.742296	-0.742296	-0.742296	-0.742296	-0.742296	-0.742296
chr1:44542956_44543456	1.11019	1.11019	1.11019	1.11019	1.11019	1.11019	0.883501	0.632326	0.650328	0.206471	-0.0300925	-0.261127	-0.568958	-1.03014	-1.19058	-1.19058	-1.19058	-1.19058	-1.19058	-1.19058
chr2:208132830_208133330	1.15648	1.15648	1.15648	1.15648	1.15648	1.15648	0.762758	0.552689	0.758239	0.0668759	-0.0552312	-0.46443	-0.760915	-0.97644	-1.13707	-1.13707	-1.13707	-1.13707	-1.13707	-1.13707
chr6:80106377_80106877	1.32399	1.32399	1.32399	1.32399	1.32399	1.32399	0.878502	0.0517895	0.0480066	-0.245057	-0.731618	-0.601364	-0.898148	-0.849927	-0.932692	-0.932692	-0.932692	-0.932692	-0.932692	-0.932692
chr1:117605692_117606192	1.34011	1.34011	1.34011	1.34011	1.34011	1.34011	0.706665	0.120603	-0.231935	-0.124502	-0.697533	-0.353673	-0.774193	-1.14991	-0.922693	-0.922693	-0.922693	-0.922693	-0.922693	-0.922693
chr13:52450401_52450901	1.35684	1.35684	1.35684	1.35684	1.35684	1.35684	0.693333	-0.0706737	-0.119861	-0.34711	-0.291457	-0.656514	-1.15825	-0.916193	-0.879053	-0.879053	-0.879053	-0.879053	-0.879053	-0.879053
chr11:94924107_94924607	1.08905	1.08905	1.08905	1.08905	1.08905	1.08905	0.877481	0.8906	0.533162	0.390391	-0.26361	-0.579941	-0.441622	-0.648675	-1.21535	-1.21535	-1.21535	-1.21535	-1.21535	-1.21535
chr6:14210870_14211370	1.36925	1.36925	1.36925	1.36925	1.36925	1.36925	0.738696	0.157057	-0.39224	-0.567773	-0.690247	-0.922953	-0.649634	-0.865808	-0.837101	-0.837101	-0.837101	-0.837101	-0.837101	-0.837101
chr19:48993176_48993676	1.08623	1.08623	1.08623	1.08623	1.08623	1.08623	1.08584	0.681095	0.49958	0.241893	-0.0429793	-0.434048	-0.547706	-0.607969	-1.23219	-1.23219	-1.23219	-1.23219	-1.23219	-1.23219
chr4:108172434_108172934	1.18798	1.18798	1.18798	1.18798	1.18798	1.18798	1.14347	0.7493	0.0914148	-0.0517814	-0.360901	-0.722498	-0.81739	-1.11107	-1.00808	-1.00808	-1.00808	-1.00808	-1.00808	-1.00808
chrX:149539972_149540472	1.24471	1.24471	1.24471	1.24471	1.24471	1.24471	0.930997	0.741847	0.0724229	-0.646254	-0.538622	-0.50134	-0.900832	-0.494546	-1.02199	-1.02199	-1.02199	-1.02199	-1.02199	-1.02199
chr10:23172220_23172720	1.1534	1.1534	1.1534	1.1534	1.1534	1.1534	1.04307	0.765351	0.293137	-0.259127	-0.236022	-0.279554	-0.445787	-0.739815	-1.17695	-1.17695	-1.17695	-1.17695	-1.17695	-1.17695
chr3:39153445_39153945	1.30139	1.30139	1.30139	1.30139	1.30139	1.30139	0.904624	0.273628	0.0170182	-0.430785	-1.15613	-1.14272	-0.952589	-0.38512	-0.822707	-0.822707	-0.822707	-0.822707	-0.822707	-0.822707
chr9:124793134_124793634	1.24914	1.24914	1.24914	1.24914	1.24914	1.24914	0.850992	0.740682	0.0790141	-0.424071	-0.547553	-0.33858	-0.78307	-0.938658	-1.02227	-1.02227	-1.02227	-1.02227	-1.02227	-1.02227
chr4:119212357_119212857	1.37587	1.37587	1.37587	1.37587	1.37587	1.37587	0.814511	-0.0824701	-0.452904	-0.658122	-0.897776	-0.903478	-0.792467	-0.466865	-0.802612	-0.802612	-0.802612	-0.802612	-0.802612	-0.802612
chr19:56121292_56121792	1.17263	1.17263	1.17263	1.17263	1.17263	1.17263	1.05882	0.680609	0.395889	0.178422	-0.596595	-1.23501	-0.904772	-1.10317	-0.918329	-0.918329	-0.918329	-0.918329	-0.918329	-0.918329
chr8:43055984_43056484	1.29463	1.29463	1.29463	1.29463	1.29463	1.29463	0.774279	-0.0623606	-0.22498	0.0492264	0.105494	-0.371171	-1.01806	-0.773331	-1.04114	-1.04114	-1.04114	-1.04114	-1.04114	-1.04114
chr15:70252910_70253410	1.33104	1.33104	1.33104	1.33104	1.33104	1.33104	0.848119	0.260561	-0.279173	-0.484658	-0.608379	-0.91433	-0.462272	-0.618428	-0.954613	-0.954613	-0.954613	-0.954613	-0.954613	-0.954613
chr15:44663452_44663952	1.26965	1.26965	1.26965	1.26965	1.26965	1.26965	0.876523	0.679334	0.0594796	-0.357542	-0.669044	-0.749423	-0.984888	-0.874081	-0.933046	-0.933046	-0.933046	-0.933046	-0.933046	-0.933046
chr2:218015537_218016037	1.22876	1.22876	1.22876	1.22876	1.22876	1.22876	0.84348	0.535244	0.553532	-0.19304	-0.568701	-0.85886	-0.703349	-0.732632	-1.04137	-1.04137	-1.04137	-1.04137	-1.04137	-1.04137
chr10:122141305_122141805	1.33019	1.33019	1.33019	1.33019	1.33019	1.33019	0.790415	0.155094	-0.112293	-0.112293	-0.581325	-0.725743	-0.966647	-0.995931	-0.905406	-0.905406	-0.905406	-0.905406	-0.905406	-0.905406
chr2:238895770_238896270	1.11203	1.11203	1.11203	1.11203	1.11203	1.11203	0.868806	0.7734	0.687081	0.0851852	0.00755921	-0.467935	-0.633295	-1.17412	-1.13647	-1.13647	-1.13647	-1.13647	-1.13647	-1.13647
chr4:155758703_155759203	1.26419	1.26419	1.26419	1.26419	1.26419	1.26419	0.816214	0.108273	-0.0272713	-0.100772	-0.224968	-0.238462	-0.40404	-0.498675	-1.16924	-1.16924	-1.16924	-1.16924	-1.16924	-1.16924
chr13:44577257_44577757	1.28584	1.28584	1.28584	1.28584	1.28584	1.28584	0.379645	0.48864	0.448132	-0.0468442	-0.342125	-0.7507	-0.873936	-0.893963	-1.02064	-1.02064	-1.02064	-1.02064	-1.02064	-1.02064
chr10:89645038_89645538	1.23709	1.23709	1.23709	1.23709	1.23709	1.23709	0.836554	0.859766	-0.25356	-0.208922	-0.208922	-0.454849	-0.827323	-1.05593	-1.01823	-1.01823	-1.01823	-1.01823	-1.01823	-1.01823
chr19:11339424_11339924	1.28771	1.28771	1.28771	1.28771	1.28771	1.28771	0.663117	0.406823	0.35679	-0.479536	-0.289913	-0.768598	-0.573659	-1.04401	-0.999543	-0.999543	-0.999543	-0.999543	-0.999543	-0.999543
chr20:17226651_17227151	1.1866	1.1866	1.1866	1.1866	1.1866	1.1866	0.795267	1.01294	0.454022	-0.296926	-0.419479	-0.945735	-0.938978	-0.708743	-1.01199	-1.01199	-1.01199	-1.01199	-1.01199	-1.01199
chr12:98644817_98645317	1.23465	1.23465	1.23465	1.23465	1.23465	1.23465	1.04332	0.631417	-0.243729	-0.515756	-0.256154	-0.287692	-0.461423	-0.885477	-1.07206	-1.07206	-1.07206	-1.07206	-1.07206	-1.07206
chr7:30870192_30870692	1.15535	1.15535	1.15535	1.15535	1.15535	1.15535	1.04728	0.562954	0.302151	-0.0165668	-0.194702	-0.0848675	-0.657732	-0.815452	-1.1792	-1.1792	-1.1792	-1.1792	-1.1792	-1.1792
chr17:5816582_5817082	1.06971	1.06971	1.06971	1.06971	1.06971	1.06971	0.85346	0.97035	0.489686	0.340904	-0.230957	-0.0192082	-0.611741	-0.967132	-1.20727	-1.20727	-1.20727	-1.20727	-1.20727	-1.20727
chr15:69160294_69160794	1.21154	1.21154	1.21154	1.21154	1.21154	1.21154	0.597857	0.707699	0.207154	-0.0253441	-0.347519	-0.0873931	-0.438999	-0.84338	-1.17322	-1.17322	-1.17322	-1.17322	-1.17322	-1.17322
chr3:37998905_37999405	1.37651	1.37651	1.37651	1.37651	1.37651	1.37651	0.696763	-0.150993	-0.431164	-0.285671	-0.382336	-0.590254	-0.762571	-0.797971	-0.925808	-0.925808	-0.925808	-0.925808	-0.925808	-0.925808
chr1:5793412_5793912	1.09716	1.09716	1.09716	1.09716	1.09716	1.09716	0.692413	0.692413	0.527388	0.718901	-0.0723431	-0.256087	-0.888821	-0.989863	-1.16783	-1.16783	-1.16783	-1.16783	-1.16783	-1.16783
chr4:140523815_140524315	1.283	1.283	1.283	1.283	1.283	1.283	0.890453	0.487081	0.209059	-0.625248	-0.804212	-0.82028	-0.678309	-0.605474	-0.958508	-0.958508	-0.958508	-0.958508	-0.958508	-0.958508
chr3:115147108_115147608	1.22666	1.22666	1.22666	1.22666	1.22666	1.22666	0.719939	0.747545	0.264409	0.0431132	-0.278592	-0.858209	-1.08537	-1.04581	-0.977835	-0.977835	-0.977835	-0.977835	-0.977835	-0.977835
chr7:94658287_94658787	1.30317	1.30317	1.30317	1.30317	1.30317	1.30317	0.903517	0.416424	-0.213722	-0.310782	-0.69659	-0.729781	-1.15857	-1.18829	-0.806875	-0.806875	-0.806875	-0.806875	-0.806875	-0.806875
chr13:29497127_29497627	1.29832	1.29832	1.29832	1.29832	1.29832	1.29832	0.444104	0.159827	0.234896	0.288482	-0.363271	-0.631417	-0.631417	-1.00921	-1.04699	-1.04699	-1.04699	-1.04699	-1.04699	-1.04699
chr6:11093513_11094013	1.31367	1.31367	1.31367	1.31367	1.31367	1.31367	0.741422	0.337048	-0.135579	-0.166607	-0.404159	-0.652234	-0.88768	-0.639324	-1.01248	-1.01248	-1.01248	-1.01248	-1.01248	-1.01248
chr22:20590000_20590500	1.18477	1.18477	1.18477	1.18477	1.18477	1.18477	0.966894	0.562171	0.184229	0.0371973	-0.181281	-0.36581	-0.610935	-0.610935	-1.1817	-1.1817	-1.1817	-1.1817	-1.1817	-1.1817
chr2:70768043_70768543	1.22784	1.22784	1.22784	1.22784	1.22784	1.22784	0.735298	0.593039	0.129298	0.128149	-0.325019	-0.243975	-0.893195	-0.862508	-1.10469	-1.10469	-1.10469	-1.10469	-1.10469	-1.10469
chr8:70608087_70608587	1.28662	1.28662	1.28662	1.28662	1.28662	1.28662	0.602251	0.385151	0.21925	-0.0679731	-0.385697	-0.499288	-0.735181	-0.770821	-1.0779	-1.0779	-1.0779	-1.0779	-1.0779	-1.0779
chr5:65721887_65722387	1.19801	1.19801	1.19801	1.19801	1.19801	1.19801	1.06863	0.709075	0.0324153	-0.442401	-0.496921	-0.393454	-0.26521	-0.592629	-1.13459	-1.13459	-1.13459	-1.13459	-1.13459	-1.13459
chr7:92528310_92528810	1.32775	1.32775	1.32775	1.32775	1.32775	1.32775	0.996243	0.207507	-0.425299	-0.665941	-0.682505	-0.973574	-1.20306	-0.833643	-0.731041	-0.731041	-0.731041	-0.731041	-0.731041	-0.731041
chr1:196608617_196609117	1.24562	1.24562	1.24562	1.24562	1.24562	1.24562	1.16451	0.516708	0.0314126	-0.249303	-0.841254	-0.954965	-0.954965	-0.810378	-0.895917	-0.895917	-0.895917	-0.895917	-0.895917	-0.895917
chr8:41933198_41933698	1.07214	1.07214	1.07214	1.07214	1.07214	1.07214	0.498067	0.280686	0.493392	0.786039	0.350118	0.054186	-0.376581	-0.726602	-1.29869	-1.29869	-1.29869	-1.29869	-1.29869	-1.29869
chr1:109075783_109076283	1.26436	1.26436	1.26436	1.26436	1.26436	1.26436	0.792709	0.303265	0.453752	-0.0611534	-0.515028	-0.735604	-1.10583	-0.992638	-0.954273	-0.954273	-0.954273	-0.954273	-0.954273	-0.954273
chr6:43644806_43645306	1.21893	1.21893	1.21893	1.21893	1.21893	1.21893	0.902442	0.707709	0.0738224	0.0334544	-0.420922	-0.444935	-0.815569	-0.975262	-1.06239	-1.06239	-1.06239	-1.06239	-1.06239	-1.06239
chr1:32872584_32873084	1.20535	1.20535	1.20535	1.20535	1.20535	1.20535	0.970152	0.369198	0.0960966	-0.0828274	-0.136207	-0.149956	-0.512683	-0.672723	-1.18552	-1.18552	-1.18552	-1.18552	-1.18552	-1.18552
chr3:130893778_130894278	1.08387	1.08387	1.08387	1.08387	1.08387	1.08387	0.686051	0.314133	0.712638	0.692769	0.304171	-0.292757	-0.724642	-0.884658	-1.21849	-1.21849	-1.21849	-1.21849	-1.21849	-1.21849
chr6:36196220_36196720	1.22053	1.22053	1.22053	1.22053	1.22053	1.22053	0.81096	0.523976	0.452897	0.0355911	-0.44529	-0.631225	-1.40736	-1.01067	-0.942014	-0.942014	-0.942014	-0.942014	-0.942014	-0.942014
chr19:12401051_12401551	1.14318	1.14318	1.14318	1.14318	1.14318	1.14318	1.0971	0.780622	0.515597	-0.295006	-0.178867	-0.562607	-0.677148	-0.837551	-1.11687	-1.11687	-1.11687	-1.11687	-1.11687	-1.11687
chr3:179147858_179148358	1.26037	1.26037	1.26037	1.26037	1.26037	1.26037	0.636656	0.564087	0.298785	-0.373654	-0.262235	-0.410528	-0.588243	-0.848297	-1.09647	-1.09647	-1.09647	-1.09647	-1.09647	-1.09647
chr7:100015291_100015791	1.06365	1.06365	1.06365	1.06365	1.06365	1.06365	1.05344	0.955584	0.685287	0.0623676	-0.201429	-0.246484	-0.704439	-1.0658	-1.1534	-1.1534	-1.1534	-1.1534	-1.1534	-1.1534
chr3:141056717_141057217	1.06902	1.06902	1.06902	1.06902	1.06902	1.06902	0.664725	1.01936	0.741055	0.435993	-0.0669363	-0.501972	-0.679086	-1.15996	-1.14455	-1.14455	-1.14455	-1.14455	-1.14455	-1.14455
chr19:43575482_43575982	1.13037	1.13037	1.13037	1.13037	1.13037	1.13037	0.72593	0.739571	0.464871	0.311284	-0.145819	-0.322249	-0.351555	-0.906556	-1.21628	-1.21628	-1.21628	-1.21628	-1.21628	-1.21628
chr22:29267749_29268249	1.36094	1.36094	1.36094	1.36094	1.36094	1.36094	0.643127	0.269248	-0.272638	-0.555633	-0.521756	-0.83669	-0.61899	-0.705692	-0.927766	-0.927766	-0.927766	-0.927766	-0.927766	-0.927766
chr5:17217237_17217737	1.28127	1.28127	1.28127	1.28127	1.28127	1.28127	0.745498	0.714052	-0.316203	-0.65436	-0.642395	-1.02698	-1.33623	-1.38251	-0.631414	-0.631414	-0.631414	-0.631414	-0.631414	-0.631414
chr2:36966497_36966997	1.25678	1.25678	1.25678	1.25678	1.25678	1.25678	0.928265	0.732159	-0.00939636	-0.488481	-0.599676	-0.646764	-0.770616	-0.623516	-1.01045	-1.01045	-1.01045	-1.01045	-1.01045	-1.01045
chr2:189661091_189661591	1.22348	1.22348	1.22348	1.22348	1.22348	1.22348	1.07865	0.282299	0.210939	0.0872644	-0.299413	-0.620359	-0.735296	-1.01646	-1.05475	-1.05475	-1.05475	-1.05475	-1.05475	-1.05475
chr4:2261958_2262458	1.2394	1.2394	1.2394	1.2394	1.2394	1.2394	1.04366	0.882544	-0.297697	-0.873364	-0.507076	-0.523406	-0.894092	-0.571037	-0.949322	-0.949322	-0.949322	-0.949322	-0.949322	-0.949322
chr8:132400253_132400753	1.21043	1.21043	1.21043	1.21043	1.21043	1.21043	0.804615	0.128565	-0.0262232	0.134726	0.107399	-0.145445	-0.38851	-0.485828	-1.23198	-1.23198	-1.23198	-1.23198	-1.23198	-1.23198
chr20:58692455_58692955	1.33697	1.33697	1.33697	1.33697	1.33697	1.33697	0.678724	-0.050071	-0.101472	-0.284714	-0.338647	-0.27984	-0.571687	-0.800263	-1.04565	-1.04565	-1.04565	-1.04565	-1.04565	-1.04565
chr15:32650363_32650863	1.38319	1.38319	1.38319	1.38319	1.38319	1.38319	0.541178	-0.114782	-0.166209	-0.513477	-0.489433	-0.489433	-0.489433	-0.795413	-0.963686	-0.963686	-0.963686	-0.963686	-0.963686	-0.963686
chr6:15504942_15505442	1.20915	1.20915	1.20915	1.20915	1.20915	1.20915	0.796469	0.374057	0.509753	0.129996	-0.135388	-0.564295	-1.26596	-1.19183	-0.984616	-0.984616	-0.984616	-0.984616	-0.984616	-0.984616
chr3:123119814_123120314	1.38242	1.38242	1.38242	1.38242	1.38242	1.38242	0.779677	-0.192063	-0.459281	-0.933891	-1.10429	-0.82512	-0.585959	-0.554797	-0.736463	-0.736463	-0.736463	-0.736463	-0.736463	-0.736463
chr13:31846434_31846934	1.28404	1.28404	1.28404	1.28404	1.28404	1.28404	0.816973	0.471337	-0.121448	-0.893664	-1.05233	-1.38984	-1.37383	-0.65386	-0.584593	-0.584593	-0.584593	-0.584593	-0.584593	-0.584593
chr7:122306448_122306948	1.29774	1.29774	1.29774	1.29774	1.29774	1.29774	0.884309	0.304157	-0.0764172	-0.361336	-0.401362	-0.519676	-0.557149	-0.863848	-1.03252	-1.03252	-1.03252	-1.03252	-1.03252	-1.03252
chr10:102225984_102226484	1.15891	1.15891	1.15891	1.15891	1.15891	1.15891	0.907319	0.340621	-0.130881	0.0873756	0.354244	0.0227014	-0.361998	-0.776475	-1.23272	-1.23272	-1.23272	-1.23272	-1.23272	-1.23272
chr6:161522361_161522861	1.12069	1.12069	1.12069	1.12069	1.12069	1.12069	0.974759	0.655079	0.499348	0.213821	-0.247629	-0.247629	-0.42245	-1.19764	-1.15863	-1.15863	-1.15863	-1.15863	-1.15863	-1.15863
chr11:6390091_6390591	1.22026	1.22026	1.22026	1.22026	1.22026	1.22026	0.893949	0.628499	0.343952	-0.13234	-0.390139	-0.643407	-0.716356	-0.878889	-1.07114	-1.07114	-1.07114	-1.07114	-1.07114	-1.07114
chr3:38823676_38824176	1.35961	1.35961	1.35961	1.35961	1.35961	1.35961	0.484415	-0.176656	-0.176656	-0.074954	-0.298374	-0.487076	-0.507915	-0.59568	-1.05412	-1.05412	-1.05412	-1.05412	-1.05412	-1.05412
chr22:22369191_22369691	1.15162	1.15162	1.15162	1.15162	1.15162	1.15162	0.741942	0.596588	0.544753	0.0755495	0.118832	-0.426823	-0.667833	-0.627185	-1.21093	-1.21093	-1.21093	-1.21093	-1.21093	-1.21093
chr2:218016043_218016543	1.27365	1.27365	1.27365	1.27365	1.27365	1.27365	0.798181	0.419502	0.150508	-0.0637266	-0.354882	-0.673859	-1.05172	-0.905982	-0.993323	-0.993323	-0.993323	-0.993323	-0.993323	-0.993323
chr1:20661298_20661798	1.26395	1.26395	1.26395	1.26395	1.26395	1.26395	0.93104	0.227282	0.358747	-0.0945797	-0.817291	-0.571533	-0.649212	-1.06634	-0.983637	-0.983637	-0.983637	-0.983637	-0.983637	-0.983637
chr20:688917_689417	1.29574	1.29574	1.29574	1.29574	1.29574	1.29574	0.709302	0.274431	0.15555	-0.173677	-0.153656	-0.841656	-1.20453	-0.933846	-0.934395	-0.934395	-0.934395	-0.934395	-0.934395	-0.934395
chr2:136234154_136234654	1.23413	1.23413	1.23413	1.23413	1.23413	1.23413	0.817247	0.638449	0.141771	0.0644032	-0.332185	-0.634985	-0.807356	-1.04173	-1.04173	-1.04173	-1.04173	-1.04173	-1.04173	-1.04173
chr4:51844558_51845058	1.31376	1.31376	1.31376	1.31376	1.31376	1.31376	1.07346	0.33647	-0.669526	-1.02052	-0.735356	-0.703676	-0.557583	-0.588143	-0.836283	-0.836283	-0.836283	-0.836283	-0.836283	-0.836283
chr3:32641327_32641827	1.24466	1.24466	1.24466	1.24466	1.24466	1.24466	0.747925	0.76179	0.264791	-0.262299	-0.659144	-0.545522	-0.634339	-0.9438	-1.03289	-1.03289	-1.03289	-1.03289	-1.03289	-1.03289
chr22:40005320_40005820	1.23376	1.23376	1.23376	1.23376	1.23376	1.23376	1.13549	0.471694	-0.0667794	-0.37981	-0.64822	-0.380164	-0.305198	-0.767775	-1.07697	-1.07697	-1.07697	-1.07697	-1.07697	-1.07697
chr2:85354348_85354848	1.17482	1.17482	1.17482	1.17482	1.17482	1.17482	0.844363	0.621652	0.346611	0.366383	-0.353458	-0.808856	-0.519958	-0.683352	-1.14372	-1.14372	-1.14372	-1.14372	-1.14372	-1.14372
chr1:156815458_156815958	1.24743	1.24743	1.24743	1.24743	1.24743	1.24743	1.02362	0.643459	0.146004	-0.532155	-0.858186	-0.540796	-0.64997	-0.926182	-0.965058	-0.965058	-0.965058	-0.965058	-0.965058	-0.965058
chr4:55948623_55949123	1.27138	1.27138	1.27138	1.27138	1.27138	1.27138	0.866716	0.202525	0.2798	-0.0893784	-0.385047	-0.562806	-0.739028	-0.97059	-1.03841	-1.03841	-1.03841	-1.03841	-1.03841	-1.03841
chr12:77025841_77026341	1.2809	1.2809	1.2809	1.2809	1.2809	1.2809	0.863049	0.359338	0.0890876	-0.19888	-0.494704	-0.540597	-0.713369	-0.73024	-1.05318	-1.05318	-1.05318	-1.05318	-1.05318	-1.05318
chr6:105403027_105403527	1.31653	1.31653	1.31653	1.31653	1.31653	1.31653	0.751229	0.085871	-0.194158	-0.110421	-0.539497	-0.455155	-0.39222	-0.555708	-1.08152	-1.08152	-1.08152	-1.08152	-1.08152	-1.08152
chr7:43582776_43583276	1.20885	1.20885	1.20885	1.20885	1.20885	1.20885	1.12551	0.484801	-0.165516	-0.420043	-0.093641	-0.21048	-0.391169	-0.780904	-1.13361	-1.13361	-1.13361	-1.13361	-1.13361	-1.13361
chr7:87220348_87220848	1.15613	1.15613	1.15613	1.15613	1.15613	1.15613	0.830874	0.730856	0.459697	0.17076	-0.0307388	-0.529217	-0.85085	-1.08656	-1.10526	-1.10526	-1.10526	-1.10526	-1.10526	-1.10526
chr12:110501886_110502386	1.35407	1.35407	1.35407	1.35407	1.35407	1.35407	0.805782	0.0628177	-0.222275	-0.56833	-0.609017	-1.01472	-1.19302	-0.840936	-0.75745	-0.75745	-0.75745	-0.75745	-0.75745	-0.75745
chr3:14651386_14651886	1.27941	1.27941	1.27941	1.27941	1.27941	1.27941	0.601288	0.480395	-0.0744466	-0.231794	-0.197107	-0.213783	-0.515584	-0.803083	-1.12039	-1.12039	-1.12039	-1.12039	-1.12039	-1.12039
chr15:89999486_89999986	1.00469	1.00469	1.00469	1.00469	1.00469	1.00469	0.871041	0.824758	0.440952	0.605335	0.379272	0.00647509	-0.685646	-1.47258	-1.16629	-1.16629	-1.16629	-1.16629	-1.16629	-1.16629
chr1:19882012_19882512	1.18255	1.18255	1.18255	1.18255	1.18255	1.18255	0.853706	0.558952	0.357022	0.00284641	-0.052187	-0.389324	-0.494962	-0.916433	-1.16916	-1.16916	-1.16916	-1.16916	-1.16916	-1.16916
chr1:110034335_110034835	1.11885	1.11885	1.11885	1.11885	1.11885	1.11885	0.957846	0.491527	0.711194	0.179546	-0.289088	-0.323523	-0.56956	-0.518079	-1.22549	-1.22549	-1.22549	-1.22549	-1.22549	-1.22549
chr4:103019461_103019961	1.28259	1.28259	1.28259	1.28259	1.28259	1.28259	0.780264	0.271737	0.128952	-0.347163	-0.227601	-0.219707	-0.818996	-0.984126	-1.04648	-1.04648	-1.04648	-1.04648	-1.04648	-1.04648
chr6:162727640_162728140	1.18653	1.18653	1.18653	1.18653	1.18653	1.18653	0.764627	0.88331	0.411282	-0.280344	-0.409023	-0.224502	-0.659757	-0.938861	-1.11099	-1.11099	-1.11099	-1.11099	-1.11099	-1.11099
chr7:131027472_131027972	1.24974	1.24974	1.24974	1.24974	1.24974	1.24974	0.655046	0.429855	0.147354	-0.00531378	-0.0949392	-0.330683	-0.648511	-0.813442	-1.13964	-1.13964	-1.13964	-1.13964	-1.13964	-1.13964
chr3:160162413_160162913	1.29768	1.29768	1.29768	1.29768	1.29768	1.29768	0.702821	0.638715	0.0330527	-0.355442	-0.626931	-0.886145	-0.859664	-1.10063	-0.888643	-0.888643	-0.888643	-0.888643	-0.888643	-0.888643
chr11:72411703_72412203	1.03838	1.03838	1.03838	1.03838	1.03838	1.03838	0.954292	0.773178	0.270068	0.391507	0.260542	-0.240192	-0.261363	-0.495501	-1.3138	-1.3138	-1.3138	-1.3138	-1.3138	-1.3138
chr8:18083843_18084343	1.18052	1.18052	1.18052	1.18052	1.18052	1.18052	1.00741	0.736906	0.233507	-0.0188571	-0.265999	-0.525426	-0.649955	-1.03228	-1.09473	-1.09473	-1.09473	-1.09473	-1.09473	-1.09473
chr14:23321148_23321648	1.28375	1.28375	1.28375	1.28375	1.28375	1.28375	0.832851	0.48428	-0.194254	-0.0427253	-0.616903	-1.16587	-0.864091	-0.387228	-0.958098	-0.958098	-0.958098	-0.958098	-0.958098	-0.958098
chr17:73343231_73343731	1.25881	1.25881	1.25881	1.25881	1.25881	1.25881	1.07524	0.45213	-0.0211903	-0.287384	-0.442189	-0.634446	-0.818328	-0.834442	-1.00704	-1.00704	-1.00704	-1.00704	-1.00704	-1.00704
chr2:85430782_85431282	1.06967	1.06967	1.06967	1.06967	1.06967	1.06967	1.05913	1.00411	0.430303	0.276896	-0.395233	-0.533248	-0.239717	-0.927361	-1.18215	-1.18215	-1.18215	-1.18215	-1.18215	-1.18215
chr12:12267089_12267589	1.34702	1.34702	1.34702	1.34702	1.34702	1.34702	1.01272	-0.00619607	-0.512284	-0.536135	-0.667875	-0.60598	-0.854368	-0.87885	-0.838859	-0.838859	-0.838859	-0.838859	-0.838859	-0.838859
chr5:62403687_62404187	1.06596	1.06596	1.06596	1.06596	1.06596	1.06596	0.891919	0.564337	0.511369	0.176249	0.434945	0.175457	-0.865137	-1.22164	-1.17721	-1.17721	-1.17721	-1.17721	-1.17721	-1.17721
chr1:40373400_40373900	1.21798	1.21798	1.21798	1.21798	1.21798	1.21798	1.11791	0.441898	-0.0425787	-0.26153	-0.217276	-0.515322	-0.308828	-0.793009	-1.12153	-1.12153	-1.12153	-1.12153	-1.12153	-1.12153
chr8:95133423_95133923	1.27025	1.27025	1.27025	1.27025	1.27025	1.27025	0.784278	0.71973	0.0592203	-0.245765	-0.817555	-0.842577	-0.617669	-1.09285	-0.928049	-0.928049	-0.928049	-0.928049	-0.928049	-0.928049
chr4:83012790_83013290	1.30352	1.30352	1.30352	1.30352	1.30352	1.30352	0.586361	0.391777	0.470672	-0.393083	-0.743703	-0.902348	-0.756583	-0.86553	-0.934776	-0.934776	-0.934776	-0.934776	-0.934776	-0.934776
chr2:17753577_17754077	1.31821	1.31821	1.31821	1.31821	1.31821	1.31821	0.98213	0.155084	-0.341885	-0.621804	-1.1104	-1.22961	-1.14012	-0.752754	-0.641652	-0.641652	-0.641652	-0.641652	-0.641652	-0.641652
chr1:89632752_89633252	1.26002	1.26002	1.26002	1.26002	1.26002	1.26002	1.00004	0.484713	-0.179518	-0.271854	-0.436006	-0.399263	-0.496318	-0.983257	-1.04644	-1.04644	-1.04644	-1.04644	-1.04644	-1.04644
chr12:56266927_56267427	1.13772	1.13772	1.13772	1.13772	1.13772	1.13772	1.00176	0.321288	0.135096	-0.120463	0.0809408	0.0380559	-0.0693918	-0.55677	-1.27614	-1.27614	-1.27614	-1.27614	-1.27614	-1.27614
chr9:129568629_129569129	1.21941	1.21941	1.21941	1.21941	1.21941	1.21941	0.882653	0.652984	0.359329	-0.192958	-0.365066	-0.976679	-1.29342	-1.23971	-0.857266	-0.857266	-0.857266	-0.857266	-0.857266	-0.857266
chr4:185396382_185396882	1.28416	1.28416	1.28416	1.28416	1.28416	1.28416	0.581224	0.175008	0.168641	-0.138438	-0.0267205	-0.232539	-0.785313	-0.777165	-1.11161	-1.11161	-1.11161	-1.11161	-1.11161	-1.11161
chr8:47292816_47293316	1.17616	1.17616	1.17616	1.17616	1.17616	1.17616	1.0005	0.816617	-0.0734134	-0.2285	0.0598802	-0.268945	-0.677795	-1.1325	-1.09213	-1.09213	-1.09213	-1.09213	-1.09213	-1.09213
chr11:17514418_17514918	1.19436	1.19436	1.19436	1.19436	1.19436	1.19436	1.05796	0.698889	-0.0144682	-0.0714137	-0.0360007	-0.603676	-1.14963	-1.20276	-0.974172	-0.974172	-0.974172	-0.974172	-0.974172	-0.974172
chr4:119454425_119454925	1.37196	1.37196	1.37196	1.37196	1.37196	1.37196	0.820519	-0.209183	-0.751697	-0.57751	-0.488085	-0.218069	-0.748627	-0.864799	-0.865713	-0.865713	-0.865713	-0.865713	-0.865713	-0.865713
chr4:141220603_141221103	1.29374	1.29374	1.29374	1.29374	1.29374	1.29374	0.86384	0.435793	-0.0451837	-0.203724	-0.50808	-0.703244	-0.956993	-0.914959	-0.954986	-0.954986	-0.954986	-0.954986	-0.954986	-0.954986
chr6:113564699_113565199	1.14582	1.14582	1.14582	1.14582	1.14582	1.14582	0.87333	0.906459	0.614782	-0.0299407	-0.378924	-0.534028	-0.967502	-0.828329	-1.08846	-1.08846	-1.08846	-1.08846	-1.08846	-1.08846
chr15:44426897_44427397	1.16651	1.16651	1.16651	1.16651	1.16651	1.16651	0.979922	0.625543	0.479989	0.209413	-0.415075	-0.88042	-0.6084	-0.777548	-1.10208	-1.10208	-1.10208	-1.10208	-1.10208	-1.10208
chr13:24160419_24160919	1.24954	1.24954	1.24954	1.24954	1.24954	1.24954	1.07326	0.104504	-0.173784	-0.216361	-0.401273	-0.110542	-0.208231	-1.06423	-1.08343	-1.08343	-1.08343	-1.08343	-1.08343	-1.08343
chr2:64094941_64095441	1.15806	1.15806	1.15806	1.15806	1.15806	1.15806	1.02131	0.719766	0.44143	0.0790961	-0.467002	-0.551515	-0.551515	-0.940924	-1.1165	-1.1165	-1.1165	-1.1165	-1.1165	-1.1165
chr14:24051713_24052213	1.33072	1.33072	1.33072	1.33072	1.33072	1.33072	0.825379	0.0638743	0.0101659	-0.440123	-0.415012	-0.796817	-0.567815	-0.813671	-0.97505	-0.97505	-0.97505	-0.97505	-0.97505	-0.97505
chr7:5634255_5634755	1.23697	1.23697	1.23697	1.23697	1.23697	1.23697	0.7379	0.132808	-0.0292719	-0.0292719	0.17449	-0.0473455	-0.42299	-0.944529	-1.1656	-1.1656	-1.1656	-1.1656	-1.1656	-1.1656
chr6:53547826_53548326	1.25433	1.25433	1.25433	1.25433	1.25433	1.25433	0.740616	0.465074	0.439974	-0.0806624	-0.609537	-0.663989	-0.703093	-0.794183	-1.05337	-1.05337	-1.05337	-1.05337	-1.05337	-1.05337
chr3:135965370_135965870	1.27433	1.27433	1.27433	1.27433	1.27433	1.27433	1.02555	0.0611035	-0.23167	-0.192078	-0.48335	-0.433407	-0.32444	-0.390215	-1.11291	-1.11291	-1.11291	-1.11291	-1.11291	-1.11291
chr18:46917262_46917762	1.18946	1.18946	1.18946	1.18946	1.18946	1.18946	0.763995	0.402846	0.482732	0.389476	-0.125248	-0.545652	-0.914703	-1.08383	-1.0844	-1.0844	-1.0844	-1.0844	-1.0844	-1.0844
chr1:89994808_89995308	1.28704	1.28704	1.28704	1.28704	1.28704	1.28704	1.01863	0.459261	-0.0329097	-0.528944	-0.861133	-1.09896	-0.916724	-0.82258	-0.823149	-0.823149	-0.823149	-0.823149	-0.823149	-0.823149
chr11:44711065_44711565	1.11368	1.11368	1.11368	1.11368	1.11368	1.11368	0.778641	0.901818	0.622503	0.135077	-0.451166	-0.362832	-0.362832	-0.669517	-1.21229	-1.21229	-1.21229	-1.21229	-1.21229	-1.21229
chr9:34329065_34329565	1.09306	1.09306	1.09306	1.09306	1.09306	1.09306	0.927757	0.911666	0.310775	-0.336989	-0.064446	0.305815	-0.61064	-0.627095	-1.2292	-1.2292	-1.2292	-1.2292	-1.2292	-1.2292
chr10:47384148_47384648	1.40998	1.40998	1.40998	1.40998	1.40998	1.40998	0.376222	-0.205022	-0.48976	-0.334657	-0.199758	-0.620538	-0.865589	-0.96771	-0.858842	-0.858842	-0.858842	-0.858842	-0.858842	-0.858842
chr21:37221026_37221526	1.17153	1.17153	1.17153	1.17153	1.17153	1.17153	0.562277	0.576648	0.430293	0.336897	-0.000737537	-0.332358	-0.652424	-0.669882	-1.21332	-1.21332	-1.21332	-1.21332	-1.21332	-1.21332
chr20:1225577_1226077	1.16651	1.16651	1.16651	1.16651	1.16651	1.16651	1.11981	0.687185	0.479554	-0.0424349	-0.449184	-0.915135	-0.722563	-1.0087	-1.0246	-1.0246	-1.0246	-1.0246	-1.0246	-1.0246
chr17:80147048_80147548	1.26763	1.26763	1.26763	1.26763	1.26763	1.26763	0.918875	0.0810489	0.408212	-0.0962663	-0.441594	-0.637986	-0.95315	-1.18996	-0.949156	-0.949156	-0.949156	-0.949156	-0.949156	-0.949156
chr3:49411866_49412366	1.19866	1.19866	1.19866	1.19866	1.19866	1.19866	0.709447	0.983037	0.0846046	-0.275061	-0.378578	-0.256472	-0.369637	-0.926469	-1.12714	-1.12714	-1.12714	-1.12714	-1.12714	-1.12714
chr2:2933438_2933938	1.20636	1.20636	1.20636	1.20636	1.20636	1.20636	0.438155	0.334894	0.87829	0.175251	-0.23653	-0.583437	-0.637133	-0.80681	-1.13348	-1.13348	-1.13348	-1.13348	-1.13348	-1.13348
chr15:47877833_47878333	1.20608	1.20608	1.20608	1.20608	1.20608	1.20608	0.956414	0.725324	0.209304	-0.0199511	-0.431984	-0.746576	-0.589206	-1.04854	-1.04854	-1.04854	-1.04854	-1.04854	-1.04854	-1.04854
chr19:33684570_33685070	1.21492	1.21492	1.21492	1.21492	1.21492	1.21492	0.982642	0.551169	0.148247	0.0813161	-0.25706	-0.710736	-0.809121	-0.818337	-1.07628	-1.07628	-1.07628	-1.07628	-1.07628	-1.07628
chr11:47916600_47917100	1.16169	1.16169	1.16169	1.16169	1.16169	1.16169	0.728262	0.497006	0.442964	0.418627	0.0082796	-0.448521	-0.629088	-0.950624	-1.17284	-1.17284	-1.17284	-1.17284	-1.17284	-1.17284
chr21:33229624_33230124	1.18443	1.18443	1.18443	1.18443	1.18443	1.18443	0.920652	0.585984	0.422952	-0.00569337	-0.121624	-0.578748	-0.840309	-0.719833	-1.12833	-1.12833	-1.12833	-1.12833	-1.12833	-1.12833
chr14:76941526_76942026	1.31442	1.31442	1.31442	1.31442	1.31442	1.31442	0.727966	0.295818	0.00983325	-0.219901	-0.480981	-0.678014	-0.572792	-0.894769	-1.01228	-1.01228	-1.01228	-1.01228	-1.01228	-1.01228
chr5:149730016_149730516	1.24771	1.24771	1.24771	1.24771	1.24771	1.24771	0.635525	0.635525	0.117892	-0.0423332	-0.221516	-0.290003	-0.907227	-0.907227	-1.08448	-1.08448	-1.08448	-1.08448	-1.08448	-1.08448
chr2:128233432_128233932	1.28542	1.28542	1.28542	1.28542	1.28542	1.28542	0.759199	0.423473	0.14233	-0.223658	-0.280527	-0.665827	-1.00609	-0.963583	-0.982975	-0.982975	-0.982975	-0.982975	-0.982975	-0.982975
chr5:98941138_98941638	1.114	1.114	1.114	1.114	1.114	1.114	0.992912	0.76084	0.360445	0.203112	0.0682149	-0.265373	-0.883291	-1.13155	-1.13155	-1.13155	-1.13155	-1.13155	-1.13155	-1.13155
chr17:44947542_44948042	1.19748	1.19748	1.19748	1.19748	1.19748	1.19748	1.05921	0.955405	0.139483	-0.360375	-0.622131	-0.763739	-0.862533	-0.809292	-0.986821	-0.986821	-0.986821	-0.986821	-0.986821	-0.986821
chr2:27582747_27583247	1.13335	1.13335	1.13335	1.13335	1.13335	1.13335	0.890745	0.915962	0.397519	0.112287	-0.0226691	-0.53938	-0.867065	-1.03764	-1.10831	-1.10831	-1.10831	-1.10831	-1.10831	-1.10831
chr19:49125084_49125584	1.29968	1.29968	1.29968	1.29968	1.29968	1.29968	0.772624	0.0802016	-0.0671664	-0.0414431	-0.133898	-0.450138	-0.712695	-0.882833	-1.06046	-1.06046	-1.06046	-1.06046	-1.06046	-1.06046
chr13:20703928_20704428	1.1613	1.1613	1.1613	1.1613	1.1613	1.1613	1.0229	0.744734	0.581027	0.0262256	-0.653136	-0.774721	-1.10269	-0.684642	-1.02125	-1.02125	-1.02125	-1.02125	-1.02125	-1.02125
chr12:123948332_123948832	1.29897	1.29897	1.29897	1.29897	1.29897	1.29897	0.546892	0.426156	0.0250038	-0.582209	-0.196558	-0.0858219	-0.767072	-0.734203	-1.071	-1.071	-1.071	-1.071	-1.071	-1.071
chr22:19953378_19953878	1.17169	1.17169	1.17169	1.17169	1.17169	1.17169	0.740844	0.17451	0.408434	0.328189	0.0812846	-0.185768	-0.433691	-0.744161	-1.23329	-1.23329	-1.23329	-1.23329	-1.23329	-1.23329
chr8:27611528_27612028	1.35022	1.35022	1.35022	1.35022	1.35022	1.35022	0.779255	0.179729	-0.288185	-0.289793	-0.700336	-0.992487	-0.732331	-0.904538	-0.85877	-0.85877	-0.85877	-0.85877	-0.85877	-0.85877
chr10:62804521_62805021	1.33562	1.33562	1.33562	1.33562	1.33562	1.33562	0.834903	0.310271	-0.298962	-0.543926	-0.775602	-1.01268	-1.19515	-0.74505	-0.764589	-0.764589	-0.764589	-0.764589	-0.764589	-0.764589
chr7:140176852_140177352	1.30819	1.30819	1.30819	1.30819	1.30819	1.30819	0.587897	0.387751	-0.0609761	-0.00304924	-0.5984	-0.279078	-0.958779	-0.836957	-1.01459	-1.01459	-1.01459	-1.01459	-1.01459	-1.01459
chr3:123636361_123636861	1.34374	1.34374	1.34374	1.34374	1.34374	1.34374	0.562985	0.112693	-0.189211	-0.685724	-0.315117	-0.300245	-0.234068	-0.777518	-1.03937	-1.03937	-1.03937	-1.03937	-1.03937	-1.03937
chr2:172555743_172556243	1.31128	1.31128	1.31128	1.31128	1.31128	1.31128	0.886926	0.316976	-0.426318	-0.30644	-0.365352	-0.941598	-0.47713	-0.596201	-0.993088	-0.993088	-0.993088	-0.993088	-0.993088	-0.993088
chr1:90717773_90718273	1.19785	1.19785	1.19785	1.19785	1.19785	1.19785	1.13359	0.479534	0.184987	-0.0368332	-0.743763	-1.5	-1.3286	-0.959934	-0.725593	-0.725593	-0.725593	-0.725593	-0.725593	-0.725593
chr5:87267558_87268058	1.37594	1.37594	1.37594	1.37594	1.37594	1.37594	0.755835	0.138266	-0.680468	-0.907159	-0.623254	-0.914122	-0.791496	-0.783118	-0.741685	-0.741685	-0.741685	-0.741685	-0.741685	-0.741685
chr10:82397698_82398198	1.36135	1.36135	1.36135	1.36135	1.36135	1.36135	0.621104	0.182887	-0.119151	-0.524155	-0.705667	-0.40829	-0.873621	-0.905884	-0.905884	-0.905884	-0.905884	-0.905884	-0.905884	-0.905884
chr11:130522167_130522667	1.32034	1.32034	1.32034	1.32034	1.32034	1.32034	0.886282	0.268196	-0.233827	-0.328965	-0.593917	-0.701098	-0.578369	-1.13819	-0.917026	-0.917026	-0.917026	-0.917026	-0.917026	-0.917026
chr6:108558329_108558829	1.25282	1.25282	1.25282	1.25282	1.25282	1.25282	0.900463	0.469557	-0.0326816	-0.225916	-0.0883566	-0.49085	-0.945443	-0.659092	-1.0741	-1.0741	-1.0741	-1.0741	-1.0741	-1.0741
chr19:45886613_45887113	1.17111	1.17111	1.17111	1.17111	1.17111	1.17111	0.8266	0.517812	0.537986	-0.0273425	-0.310739	-0.2206	-0.405433	-0.718384	-1.20442	-1.20442	-1.20442	-1.20442	-1.20442	-1.20442
chr13:52159276_52159776	1.13998	1.13998	1.13998	1.13998	1.13998	1.13998	0.88568	1.00978	0.599592	0.101683	-0.646788	-1.03782	-1.05993	-0.853633	-0.973072	-0.973072	-0.973072	-0.973072	-0.973072	-0.973072
chr5:60699896_60700396	1.31369	1.31369	1.31369	1.31369	1.31369	1.31369	0.502582	0.348128	0.145346	-0.421337	-0.211417	-0.371115	-0.634536	-1.03426	-1.03426	-1.03426	-1.03426	-1.03426	-1.03426	-1.03426
chr7:102748604_102749104	1.12776	1.12776	1.12776	1.12776	1.12776	1.12776	0.530763	0.873878	0.578145	0.210973	-0.556004	-0.184178	-0.377337	-0.36131	-1.24692	-1.24692	-1.24692	-1.24692	-1.24692	-1.24692
chr4:145936696_145937196	1.39012	1.39012	1.39012	1.39012	1.39012	1.39012	0.605681	0.0728622	-0.338106	-0.728822	-0.803545	-0.626627	-0.648786	-0.822154	-0.841873	-0.841873	-0.841873	-0.841873	-0.841873	-0.841873
chr18:12441479_12441979	1.26095	1.26095	1.26095	1.26095	1.26095	1.26095	0.725726	0.105298	0.125538	-0.179161	0.028954	-0.433918	-0.394536	-0.491965	-1.17527	-1.17527	-1.17527	-1.17527	-1.17527	-1.17527
chr12:131565438_131565938	1.36283	1.36283	1.36283	1.36283	1.36283	1.36283	0.690564	-0.165707	0.0317702	-0.29982	-0.64506	-0.845775	-0.573399	-0.973468	-0.899351	-0.899351	-0.899351	-0.899351	-0.899351	-0.899351
chr3:58237530_58238030	1.27207	1.27207	1.27207	1.27207	1.27207	1.27207	0.839046	0.398814	0.303383	-0.313715	-0.448566	-0.975455	-1.08649	-1.25969	-0.84829	-0.84829	-0.84829	-0.84829	-0.84829	-0.84829
chr3:42880914_42881414	1.24034	1.24034	1.24034	1.24034	1.24034	1.24034	0.798032	0.719784	0.192817	-0.306387	-0.280603	-0.49532	-0.888528	-1.06167	-1.02002	-1.02002	-1.02002	-1.02002	-1.02002	-1.02002
chr10:48691787_48692287	1.07711	1.07711	1.07711	1.07711	1.07711	1.07711	0.725044	0.191778	0.422728	0.820419	0.193379	-0.0989948	-0.121172	-1.14835	-1.24125	-1.24125	-1.24125	-1.24125	-1.24125	-1.24125
chr14:88554761_88555261	1.19493	1.19493	1.19493	1.19493	1.19493	1.19493	0.752463	0.311909	0.542909	0.252881	-0.0926173	-0.617286	-0.493998	-0.963249	-1.14376	-1.14376	-1.14376	-1.14376	-1.14376	-1.14376
chr5:55233433_55233933	1.29508	1.29508	1.29508	1.29508	1.29508	1.29508	0.852581	0.126139	0.0709662	-0.0890937	-0.434617	-0.523776	-0.624238	-0.866466	-1.04699	-1.04699	-1.04699	-1.04699	-1.04699	-1.04699
chr8:38386188_38386688	1.14534	1.14534	1.14534	1.14534	1.14534	1.14534	1.0571	0.273738	-0.134162	-0.0454714	0.0890299	-0.0499869	0.0618901	-0.523402	-1.26679	-1.26679	-1.26679	-1.26679	-1.26679	-1.26679
chr11:62621827_62622327	1.15653	1.15653	1.15653	1.15653	1.15653	1.15653	0.428569	0.549198	0.581905	0.652018	-0.0178153	-0.546019	-1.21424	-1.45402	-0.986462	-0.986462	-0.986462	-0.986462	-0.986462	-0.986462
chr12:92021595_92022095	1.22356	1.22356	1.22356	1.22356	1.22356	1.22356	0.703437	0.420276	0.566055	-0.052247	-0.153694	-0.617841	-0.807729	-1.40728	-0.99872	-0.99872	-0.99872	-0.99872	-0.99872	-0.99872
chr18:63970271_63970771	1.21578	1.21578	1.21578	1.21578	1.21578	1.21578	1.05935	0.617131	-0.000645114	-0.235732	-0.189492	-0.462189	-0.790945	-0.747519	-1.09077	-1.09077	-1.09077	-1.09077	-1.09077	-1.09077
chrX:47650525_47651025	1.07912	1.07912	1.07912	1.07912	1.07912	1.07912	0.725624	1.02755	0.441407	0.475857	0.110615	-0.518513	-1.05478	-0.700269	-1.16371	-1.16371	-1.16371	-1.16371	-1.16371	-1.16371
chr2:38214107_38214607	1.24056	1.24056	1.24056	1.24056	1.24056	1.24056	1.00231	0.559745	-0.0779191	-0.238697	-0.238697	-0.561545	-0.561545	-0.891282	-1.07262	-1.07262	-1.07262	-1.07262	-1.07262	-1.07262
chr22:19178589_19179089	1.18177	1.18177	1.18177	1.18177	1.18177	1.18177	0.743567	0.676047	-0.126566	-0.322728	0.315338	-0.0908197	-0.504328	-0.47079	-1.21839	-1.21839	-1.21839	-1.21839	-1.21839	-1.21839
chr14:56057436_56057936	1.39326	1.39326	1.39326	1.39326	1.39326	1.39326	0.455863	-0.168897	-0.699333	-0.488672	-0.279104	-0.328003	-0.422796	-0.596775	-0.971973	-0.971973	-0.971973	-0.971973	-0.971973	-0.971973
chr6:135497540_135498040	1.33565	1.33565	1.33565	1.33565	1.33565	1.33565	0.805415	0.432941	-0.370796	-0.890053	-0.754893	-0.781103	-1.10073	-0.956597	-0.73301	-0.73301	-0.73301	-0.73301	-0.73301	-0.73301
chr10:73413822_73414322	1.38573	1.38573	1.38573	1.38573	1.38573	1.38573	0.519035	-0.189971	-0.815512	-0.484136	-0.208167	-0.33575	-0.391054	-0.627161	-0.96361	-0.96361	-0.96361	-0.96361	-0.96361	-0.96361
chr19:3721394_3721894	1.30987	1.30987	1.30987	1.30987	1.30987	1.30987	0.864012	0.207321	-0.0810442	-0.317045	-0.500925	-0.383976	-0.732976	-1.17969	-0.955818	-0.955818	-0.955818	-0.955818	-0.955818	-0.955818
chr4:70993326_70993826	1.18602	1.18602	1.18602	1.18602	1.18602	1.18602	1.00334	1.13253	-0.106839	-0.561139	-0.349254	-0.669945	-0.507936	-1.04411	-1.00213	-1.00213	-1.00213	-1.00213	-1.00213	-1.00213
chr10:38094125_38094625	1.33668	1.33668	1.33668	1.33668	1.33668	1.33668	0.624244	0.0130229	-0.0426097	-0.111523	-0.184074	-0.713151	-1.04342	-1.21833	-0.890705	-0.890705	-0.890705	-0.890705	-0.890705	-0.890705
chr5:91280450_91280950	1.31399	1.31399	1.31399	1.31399	1.31399	1.31399	0.873744	0.428931	-0.265219	-0.522565	-0.476054	-0.600768	-1.13683	-0.821414	-0.893965	-0.893965	-0.893965	-0.893965	-0.893965	-0.893965
chr9:11546166_11546666	1.24721	1.24721	1.24721	1.24721	1.24721	1.24721	0.900231	0.272608	0.272608	-0.0356243	-0.22008	-0.622811	-0.622811	-1.09714	-1.05504	-1.05504	-1.05504	-1.05504	-1.05504	-1.05504
chr16:3282663_3283163	1.08648	1.08648	1.08648	1.08648	1.08648	1.08648	0.739481	0.426075	0.370306	0.420153	0.390472	0.0127533	-0.253968	-1.06345	-1.26011	-1.26011	-1.26011	-1.26011	-1.26011	-1.26011
chr14:31207471_31207971	1.22593	1.22593	1.22593	1.22593	1.22593	1.22593	1.08369	0.709256	-0.151772	-0.248459	-0.384983	-0.476895	-0.859525	-0.792606	-1.03905	-1.03905	-1.03905	-1.03905	-1.03905	-1.03905
chr4:98143264_98143764	1.26356	1.26356	1.26356	1.26356	1.26356	1.26356	1.13894	0.347573	0.152777	-0.526981	-0.622039	-0.671205	-1.0216	-0.830684	-0.92469	-0.92469	-0.92469	-0.92469	-0.92469	-0.92469
chr2:66848986_66849486	1.21726	1.21726	1.21726	1.21726	1.21726	1.21726	0.976953	0.0315293	-0.258422	0.0635941	0.275443	-0.0501881	-0.550678	-0.956339	-1.13924	-1.13924	-1.13924	-1.13924	-1.13924	-1.13924
chr12:42144739_42145239	1.34627	1.34627	1.34627	1.34627	1.34627	1.34627	0.82011	0.083823	-0.661506	-0.333472	-0.505691	-0.498811	-0.458863	-0.634779	-0.981404	-0.981404	-0.981404	-0.981404	-0.981404	-0.981404
chr6:166956391_166956891	1.21403	1.21403	1.21403	1.21403	1.21403	1.21403	1.05779	0.271741	0.193904	-0.27495	-0.228255	-0.374211	-0.414865	-0.474981	-1.17339	-1.17339	-1.17339	-1.17339	-1.17339	-1.17339
chr1:109498160_109498660	1.26523	1.26523	1.26523	1.26523	1.26523	1.26523	0.721524	0.564487	0.268543	-0.298962	-0.394337	-0.575664	-0.768829	-0.724914	-1.06387	-1.06387	-1.06387	-1.06387	-1.06387	-1.06387
chr8:101760086_101760586	1.06214	1.06214	1.06214	1.06214	1.06214	1.06214	0.990977	0.615266	0.518322	0.421306	0.345373	-0.357564	-0.695794	-0.941665	-1.21151	-1.21151	-1.21151	-1.21151	-1.21151	-1.21151
chr4:37686214_37686714	1.1936	1.1936	1.1936	1.1936	1.1936	1.1936	0.76803	0.511642	0.120142	0.328733	-0.0705701	-0.372523	-0.464967	-1.02352	-1.15976	-1.15976	-1.15976	-1.15976	-1.15976	-1.15976
chr6:35318276_35318776	1.28166	1.28166	1.28166	1.28166	1.28166	1.28166	0.767859	0.137172	0.137172	0.084565	-0.342996	-0.369451	-1.00794	-0.816258	-1.04668	-1.04668	-1.04668	-1.04668	-1.04668	-1.04668
chr4:52722218_52722718	1.21697	1.21697	1.21697	1.21697	1.21697	1.21697	0.957724	0.680095	-0.0672945	-0.507834	-0.294967	-0.0875428	-0.748069	-0.49213	-1.12363	-1.12363	-1.12363	-1.12363	-1.12363	-1.12363
chr15:80152465_80152965	1.29135	1.29135	1.29135	1.29135	1.29135	1.29135	0.85929	0.0639564	-0.131816	-0.35859	-0.264871	-0.239382	-0.62394	-0.3638	-1.11482	-1.11482	-1.11482	-1.11482	-1.11482	-1.11482
chr7:7969570_7970070	1.07786	1.07786	1.07786	1.07786	1.07786	1.07786	1.07786	0.730308	0.311896	0.311896	0.0412036	-0.223163	-0.410635	-0.954915	-1.22527	-1.22527	-1.22527	-1.22527	-1.22527	-1.22527
chr21:45642868_45643368	1.30662	1.30662	1.30662	1.30662	1.30662	1.30662	0.527921	0.285545	0.030516	-0.0854988	-0.156941	-0.838015	-0.34645	-0.912326	-1.05741	-1.05741	-1.05741	-1.05741	-1.05741	-1.05741
chr17:56977815_56978315	0.952854	0.952854	0.952854	0.952854	0.952854	0.952854	0.952854	0.952854	0.896725	0.517709	0.158368	-0.376859	-0.399427	-0.777204	-1.27369	-1.27369	-1.27369	-1.27369	-1.27369	-1.27369
chr10:72260640_72261140	1.15485	1.15485	1.15485	1.15485	1.15485	1.15485	0.851965	0.610199	0.800336	0.0362306	-0.385449	-0.522673	-0.640451	-1.05986	-1.10323	-1.10323	-1.10323	-1.10323	-1.10323	-1.10323
chr1:173429839_173430339	1.35206	1.35206	1.35206	1.35206	1.35206	1.35206	0.806706	0.174536	-0.349725	-0.512678	-0.512678	-0.622301	-0.97493	-0.97493	-0.857726	-0.857726	-0.857726	-0.857726	-0.857726	-0.857726
chr19:49676520_49677020	1.24855	1.24855	1.24855	1.24855	1.24855	1.24855	0.81469	0.535812	0.0691108	-0.255008	-0.0944078	-0.308972	-0.953787	-1.08317	-1.03592	-1.03592	-1.03592	-1.03592	-1.03592	-1.03592
chr2:88069070_88069570	1.13882	1.13882	1.13882	1.13882	1.13882	1.13882	0.780981	0.538373	0.409369	0.383989	0.11209	-0.288557	-0.628937	-0.964256	-1.196	-1.196	-1.196	-1.196	-1.196	-1.196
chr20:41317516_41318016	1.24461	1.24461	1.24461	1.24461	1.24461	1.24461	1.22659	0.534538	-0.335037	-0.229348	-0.484653	-0.897581	-0.658766	-1.03401	-0.931566	-0.931566	-0.931566	-0.931566	-0.931566	-0.931566
chr4:10123456_10123956	0.970273	0.970273	0.970273	0.970273	0.970273	0.970273	0.851697	0.882487	0.480296	0.10787	0.598678	0.222766	-0.223445	-0.805356	-1.32277	-1.32277	-1.32277	-1.32277	-1.32277	-1.32277
chr18:6650707_6651207	1.3434	1.3434	1.3434	1.3434	1.3434	1.3434	0.812494	0.177456	-0.235507	-0.468611	-0.468611	-0.881965	-0.686467	-1.10787	-0.866884	-0.866884	-0.866884	-0.866884	-0.866884	-0.866884
chr11:34916239_34916739	1.19223	1.19223	1.19223	1.19223	1.19223	1.19223	0.910913	0.746508	-0.270185	-0.11969	0.0948288	-0.121279	-0.803544	-1.37141	-1.03658	-1.03658	-1.03658	-1.03658	-1.03658	-1.03658
chr3:127226920_127227420	1.16562	1.16562	1.16562	1.16562	1.16562	1.16562	0.923021	0.706983	0.522452	0.0116379	-0.452537	-0.333823	-0.688091	-1.09762	-1.09762	-1.09762	-1.09762	-1.09762	-1.09762	-1.09762
chr18:267879_268379	1.33714	1.33714	1.33714	1.33714	1.33714	1.33714	0.883758	0.0822501	-0.115042	-0.427494	-0.748469	-0.841562	-0.882656	-0.502831	-0.911797	-0.911797	-0.911797	-0.911797	-0.911797	-0.911797
chr8:77000091_77000591	1.30562	1.30562	1.30562	1.30562	1.30562	1.30562	0.71332	0.60548	-0.423135	-0.590561	-1.36082	-1.31811	-0.870768	-0.55023	-0.673145	-0.673145	-0.673145	-0.673145	-0.673145	-0.673145
chr4:128287611_128288111	1.28905	1.28905	1.28905	1.28905	1.28905	1.28905	1.05074	0.242482	-0.945757	-1.17066	-1.29357	-1.04032	-0.952986	-0.748373	-0.479314	-0.479314	-0.479314	-0.479314	-0.479314	-0.479314
chr5:173707447_173707947	1.29764	1.29764	1.29764	1.29764	1.29764	1.29764	0.764708	0.219101	-0.184852	-0.03379	-0.294227	-0.487579	-0.433903	-0.889045	-1.07438	-1.07438	-1.07438	-1.07438	-1.07438	-1.07438
chr19:57947559_57948059	1.31751	1.31751	1.31751	1.31751	1.31751	1.31751	0.957725	0.00442505	0.0379596	-0.275239	-0.630106	-0.794401	-0.651263	-0.900041	-0.942355	-0.942355	-0.942355	-0.942355	-0.942355	-0.942355
chr13:33490408_33490908	1.19224	1.19224	1.19224	1.19224	1.19224	1.19224	0.551879	0.138091	0.58146	0.198821	0.0113911	-0.234604	-0.257388	-0.775062	-1.22801	-1.22801	-1.22801	-1.22801	-1.22801	-1.22801
chr20:45880888_45881388	1.34724	1.34724	1.34724	1.34724	1.34724	1.34724	0.670913	0.475988	-0.467468	-0.701573	-0.945855	-1.20316	-0.667626	-0.685977	-0.759785	-0.759785	-0.759785	-0.759785	-0.759785	-0.759785
chr2:88691409_88691909	1.23504	1.23504	1.23504	1.23504	1.23504	1.23504	0.504758	0.792126	0.606779	-0.304717	-0.622953	-0.424136	-1.00231	-0.891508	-1.01138	-1.01138	-1.01138	-1.01138	-1.01138	-1.01138
chr6:42929211_42929711	1.02268	1.02268	1.02268	1.02268	1.02268	1.02268	1.01137	0.816397	0.512116	0.603105	0.13687	-0.512904	-0.459189	-0.755431	-1.24807	-1.24807	-1.24807	-1.24807	-1.24807	-1.24807
chr12:53220866_53221366	1.27569	1.27569	1.27569	1.27569	1.27569	1.27569	0.820687	0.530081	0.000573992	-0.16401	-0.797885	-1.27743	-1.15064	-1.16901	-0.741085	-0.741085	-0.741085	-0.741085	-0.741085	-0.741085
chr3:46488627_46489127	1.26001	1.26001	1.26001	1.26001	1.26001	1.26001	1.0161	0.773319	-0.171268	-0.620958	-0.620958	-0.875118	-0.89793	-1.0763	-0.84782	-0.84782	-0.84782	-0.84782	-0.84782	-0.84782
chr11:57741127_57741627	1.31537	1.31537	1.31537	1.31537	1.31537	1.31537	0.948462	0.336284	-0.279497	-0.305053	-0.66044	-0.947616	-0.878359	-0.924178	-0.863636	-0.863636	-0.863636	-0.863636	-0.863636	-0.863636
chr20:38472466_38472966	1.2123	1.2123	1.2123	1.2123	1.2123	1.2123	1.09031	0.541611	0.343539	-0.290691	-0.394844	-0.798295	-0.671466	-0.779032	-1.05249	-1.05249	-1.05249	-1.05249	-1.05249	-1.05249
chr2:96536454_96536954	1.35646	1.35646	1.35646	1.35646	1.35646	1.35646	0.453336	0.258079	-0.161002	-0.47475	-0.578922	-0.352846	-0.362784	-0.925183	-0.999117	-0.999117	-0.999117	-0.999117	-0.999117	-0.999117
chr8:52714279_52714779	1.23425	1.23425	1.23425	1.23425	1.23425	1.23425	0.618743	0.618743	0.195194	-0.0459244	0.00150197	-0.347862	-0.95687	-1.13532	-1.05895	-1.05895	-1.05895	-1.05895	-1.05895	-1.05895
chr11:44894361_44894861	1.28791	1.28791	1.28791	1.28791	1.28791	1.28791	0.319729	0.175408	-0.572161	-0.00985478	0.410475	-0.0292798	-0.443144	-0.964282	-1.1024	-1.1024	-1.1024	-1.1024	-1.1024	-1.1024
chr2:192194728_192195228	1.13056	1.13056	1.13056	1.13056	1.13056	1.13056	0.886327	0.792672	0.380042	0.150365	-0.279405	-0.359002	-0.318416	-0.717252	-1.21978	-1.21978	-1.21978	-1.21978	-1.21978	-1.21978
chr1:230978657_230979157	1.27201	1.27201	1.27201	1.27201	1.27201	1.27201	1.02072	0.47134	0.055457	-0.339519	-0.647093	-0.790071	-0.846606	-1.02513	-0.921861	-0.921861	-0.921861	-0.921861	-0.921861	-0.921861
chr6:31815112_31815612	1.30362	1.30362	1.30362	1.30362	1.30362	1.30362	0.798621	0.447166	-0.581747	-1.00116	-1.12555	-1.13621	-1.2376	-1.04741	-0.489634	-0.489634	-0.489634	-0.489634	-0.489634	-0.489634
chr12:63779553_63780053	1.16197	1.16197	1.16197	1.16197	1.16197	1.16197	0.867851	0.400921	0.10034	0.264563	-0.110549	-0.0440788	-0.147647	-1.05516	-1.20801	-1.20801	-1.20801	-1.20801	-1.20801	-1.20801
chr11:110374755_110375255	1.20325	1.20325	1.20325	1.20325	1.20325	1.20325	0.659958	0.551116	0.601072	0.0861264	-0.207276	-0.557194	-0.748552	-0.926843	-1.11298	-1.11298	-1.11298	-1.11298	-1.11298	-1.11298
chr22:49296562_49297062	1.20938	1.20938	1.20938	1.20938	1.20938	1.20938	0.656546	0.412885	0.412885	0.247695	-0.108901	-0.363982	-0.799466	-0.799466	-1.15242	-1.15242	-1.15242	-1.15242	-1.15242	-1.15242
chr5:113806837_113807337	1.08051	1.08051	1.08051	1.08051	1.08051	1.08051	1.02915	0.574443	0.517502	0.464047	0.107449	-0.250984	-0.831814	-1.15612	-1.15612	-1.15612	-1.15612	-1.15612	-1.15612	-1.15612
chr7:151243568_151244068	1.12894	1.12894	1.12894	1.12894	1.12894	1.12894	0.850969	0.468645	0.468645	0.169052	-0.105886	0.0186061	-0.379566	-0.718633	-1.25758	-1.25758	-1.25758	-1.25758	-1.25758	-1.25758
chr21:44338972_44339472	1.38994	1.38994	1.38994	1.38994	1.38994	1.38994	0.416084	0.206978	-0.466607	-0.527394	-0.689331	-0.842178	-0.580657	-0.351153	-0.917568	-0.917568	-0.917568	-0.917568	-0.917568	-0.917568
chr15:59689206_59689706	1.2324	1.2324	1.2324	1.2324	1.2324	1.2324	0.719403	0.365788	-0.180563	-0.138494	0.157335	-0.102286	-0.296843	-0.834607	-1.18069	-1.18069	-1.18069	-1.18069	-1.18069	-1.18069
chrX:53422518_53423018	1.19153	1.19153	1.19153	1.19153	1.19153	1.19153	1.18012	0.983442	0.0314812	-0.547959	-0.914019	-1.09507	-0.92845	-0.705259	-0.858913	-0.858913	-0.858913	-0.858913	-0.858913	-0.858913
chr4:48779221_48779721	1.24895	1.24895	1.24895	1.24895	1.24895	1.24895	0.710843	0.491898	0.195243	0.02933	-0.481539	-0.573957	-0.354157	-0.769197	-1.12369	-1.12369	-1.12369	-1.12369	-1.12369	-1.12369
chr13:114064967_114065467	1.2148	1.2148	1.2148	1.2148	1.2148	1.2148	1.07826	0.528295	-0.424821	-0.292783	-0.43518	-0.627874	0.0143718	-0.305363	-1.13729	-1.13729	-1.13729	-1.13729	-1.13729	-1.13729
chr3:128617543_128618043	1.31239	1.31239	1.31239	1.31239	1.31239	1.31239	0.665309	0.343525	0.0465083	-0.316466	-0.513822	-0.393365	-0.588203	-1.03658	-1.01354	-1.01354	-1.01354	-1.01354	-1.01354	-1.01354
chr10:15168673_15169173	1.26687	1.26687	1.26687	1.26687	1.26687	1.26687	0.889293	0.477416	0.0115937	-0.517059	-0.511221	-0.439972	-0.230931	-0.982947	-1.04957	-1.04957	-1.04957	-1.04957	-1.04957	-1.04957
chr1:213015597_213016097	1.3452	1.3452	1.3452	1.3452	1.3452	1.3452	0.539195	0.457623	-0.0917286	-0.554732	-0.615055	-0.726577	-0.685506	-0.60804	-0.964401	-0.964401	-0.964401	-0.964401	-0.964401	-0.964401
chr1:92784922_92785422	1.27864	1.27864	1.27864	1.27864	1.27864	1.27864	0.998189	0.578322	-0.254044	-0.457478	-1.08346	-1.23273	-0.807886	-0.988765	-0.737331	-0.737331	-0.737331	-0.737331	-0.737331	-0.737331
chr2:22020027_22020527	1.18138	1.18138	1.18138	1.18138	1.18138	1.18138	0.814193	0.947866	0.0604171	0.278719	-0.440942	-0.772768	-0.573457	-0.88359	-1.08645	-1.08645	-1.08645	-1.08645	-1.08645	-1.08645
chr1:100132736_100133236	1.36751	1.36751	1.36751	1.36751	1.36751	1.36751	0.548513	0.302295	-0.247505	-0.89051	-1.18727	-0.74803	-0.943815	-0.918433	-0.686719	-0.686719	-0.686719	-0.686719	-0.686719	-0.686719
chr2:128027896_128028396	1.27768	1.27768	1.27768	1.27768	1.27768	1.27768	0.406667	0.900048	0.182918	-0.235845	-0.522807	-0.811635	-0.892836	-0.851768	-0.973472	-0.973472	-0.973472	-0.973472	-0.973472	-0.973472
chr4:15681460_15681960	1.33369	1.33369	1.33369	1.33369	1.33369	1.33369	0.966362	-0.00178535	-0.527836	-0.573506	-0.355407	-0.537629	-0.407278	-0.735036	-0.971666	-0.971666	-0.971666	-0.971666	-0.971666	-0.971666
chr10:43396569_43397069	1.22369	1.22369	1.22369	1.22369	1.22369	1.22369	0.854491	0.759592	0.233356	-0.155373	-0.377272	-0.701008	-0.816952	-0.816952	-1.05367	-1.05367	-1.05367	-1.05367	-1.05367	-1.05367
chr19:10454215_10454715	1.34654	1.34654	1.34654	1.34654	1.34654	1.34654	0.709332	-0.10788	-0.281635	-0.168534	-0.359178	-0.583583	-0.415624	-0.675511	-1.03278	-1.03278	-1.03278	-1.03278	-1.03278	-1.03278
chr1:15226541_15227041	1.3174	1.3174	1.3174	1.3174	1.3174	1.3174	0.855055	0.206261	-0.0927633	-0.260002	-0.450679	-0.708923	-0.708923	-0.801809	-0.990434	-0.990434	-0.990434	-0.990434	-0.990434	-0.990434
chr1:229410513_229411013	1.20125	1.20125	1.20125	1.20125	1.20125	1.20125	0.380522	0.631035	0.0800735	-0.0198131	0.197864	0.0211149	-0.340866	-0.831304	-1.22102	-1.22102	-1.22102	-1.22102	-1.22102	-1.22102
chrX:154516138_154516638	1.37618	1.37618	1.37618	1.37618	1.37618	1.37618	0.269744	0.510288	-0.42553	-0.582226	-0.578297	-0.842498	-1.22443	-1.06026	-0.720644	-0.720644	-0.720644	-0.720644	-0.720644	-0.720644
chr1:113812164_113812664	1.37715	1.37715	1.37715	1.37715	1.37715	1.37715	0.673237	-0.361279	-0.493403	-0.0012275	-0.465236	-0.611331	-0.810434	-0.644676	-0.924754	-0.924754	-0.924754	-0.924754	-0.924754	-0.924754
chr1:205350491_205350991	1.29693	1.29693	1.29693	1.29693	1.29693	1.29693	0.736488	0.489475	0.190051	-0.34982	-0.937296	-0.694308	-0.694308	-0.728245	-0.965603	-0.965603	-0.965603	-0.965603	-0.965603	-0.965603
chr12:49018611_49019111	1.28996	1.28996	1.28996	1.28996	1.28996	1.28996	0.550625	0.226184	0.0246915	-0.220398	-0.00123753	-0.223898	-0.484813	-1.29862	-1.05205	-1.05205	-1.05205	-1.05205	-1.05205	-1.05205
chr1:160343076_160343576	1.21132	1.21132	1.21132	1.21132	1.21132	1.21132	1.06415	0.414227	0.297139	-0.455108	-0.335449	-0.149763	-0.570539	-0.914124	-1.10308	-1.10308	-1.10308	-1.10308	-1.10308	-1.10308
chr22:31630641_31631141	1.16416	1.16416	1.16416	1.16416	1.16416	1.16416	1.03509	0.677008	0.0497133	-0.121268	-0.00843822	-0.218917	-0.498511	-0.82138	-1.17971	-1.17971	-1.17971	-1.17971	-1.17971	-1.17971
chr13:113931691_113932191	1.11978	1.11978	1.11978	1.11978	1.11978	1.11978	0.844728	0.486622	0.486622	0.485849	0.0447493	-0.378772	-0.477494	-0.969234	-1.20696	-1.20696	-1.20696	-1.20696	-1.20696	-1.20696
chr7:151062206_151062706	1.15886	1.15886	1.15886	1.15886	1.15886	1.15886	0.789803	0.268047	0.210228	-0.109354	0.406682	0.0427212	-0.22844	-0.980319	-1.22542	-1.22542	-1.22542	-1.22542	-1.22542	-1.22542
chr1:243255074_243255574	1.30262	1.30262	1.30262	1.30262	1.30262	1.30262	0.309635	0.23921	0.212228	-0.308668	-0.163885	-0.0045077	-0.533194	-0.906139	-1.11006	-1.11006	-1.11006	-1.11006	-1.11006	-1.11006
chr7:36152615_36153115	1.30722	1.30722	1.30722	1.30722	1.30722	1.30722	0.734496	0.577809	0.0121955	-0.557262	-0.711183	-1.10641	-1.06498	-0.918492	-0.801586	-0.801586	-0.801586	-0.801586	-0.801586	-0.801586
chr16:11915757_11916257	1.30281	1.30281	1.30281	1.30281	1.30281	1.30281	0.750048	-0.100337	0.238387	0.0626535	-0.277808	-0.703717	-0.825095	-1.07347	-0.981256	-0.981256	-0.981256	-0.981256	-0.981256	-0.981256
chr3:139533642_139534142	1.39357	1.39357	1.39357	1.39357	1.39357	1.39357	0.491099	-0.48786	-0.588055	-1.09353	-1.34072	-1.13269	-0.642649	-0.62581	-0.490203	-0.490203	-0.490203	-0.490203	-0.490203	-0.490203
chr14:73058222_73058722	1.3634	1.3634	1.3634	1.3634	1.3634	1.3634	0.562117	-0.258685	-0.258685	-0.37838	-0.676953	-0.303034	-0.353229	-0.264107	-1.04157	-1.04157	-1.04157	-1.04157	-1.04157	-1.04157
chr5:116084788_116085288	1.28091	1.28091	1.28091	1.28091	1.28091	1.28091	0.735609	0.376622	0.0655069	-0.345375	-0.296982	-0.170379	-0.689284	-1.16798	-1.0322	-1.0322	-1.0322	-1.0322	-1.0322	-1.0322
chr16:58495812_58496312	1.21822	1.21822	1.21822	1.21822	1.21822	1.21822	0.654604	0.406191	0.10507	0.218984	0.173909	-0.506463	-0.636604	-0.663438	-1.17693	-1.17693	-1.17693	-1.17693	-1.17693	-1.17693
chr2:20599953_20600453	1.12016	1.12016	1.12016	1.12016	1.12016	1.12016	1.06773	0.413454	0.413454	0.166661	0.0220596	0.00634784	-0.656022	-1.00191	-1.19213	-1.19213	-1.19213	-1.19213	-1.19213	-1.19213
chr3:50412351_50412851	1.24863	1.24863	1.24863	1.24863	1.24863	1.24863	0.59141	0.342544	0.342544	0.202254	-0.127964	-0.746597	-0.659635	-0.753343	-1.11383	-1.11383	-1.11383	-1.11383	-1.11383	-1.11383
chr20:36835539_36836039	1.0452	1.0452	1.0452	1.0452	1.0452	1.0452	0.680567	0.69607	0.481955	0.524745	0.160529	-0.113491	-0.171353	-0.546425	-1.33063	-1.33063	-1.33063	-1.33063	-1.33063	-1.33063
chr4:3830386_3830886	1.23812	1.23812	1.23812	1.23812	1.23812	1.23812	0.775064	0.775064	-0.0999397	0.0342601	-0.330127	-0.556665	-0.838078	-0.75425	-1.07235	-1.07235	-1.07235	-1.07235	-1.07235	-1.07235
chr12:108475287_108475787	1.13529	1.13529	1.13529	1.13529	1.13529	1.13529	0.865858	1.10895	-0.0341366	-0.0888467	0.038109	-0.174078	-0.695879	-1.11881	-1.11881	-1.11881	-1.11881	-1.11881	-1.11881	-1.11881
chr6:88963453_88963953	1.34881	1.34881	1.34881	1.34881	1.34881	1.34881	0.7166	-0.405718	-0.107629	-0.108408	-0.333279	-0.495096	-0.553139	-0.675225	-1.02183	-1.02183	-1.02183	-1.02183	-1.02183	-1.02183
chr7:25854917_25855417	1.26465	1.26465	1.26465	1.26465	1.26465	1.26465	0.594306	0.482648	0.278971	-0.069073	-0.350624	-0.349794	-0.775025	-0.816022	-1.09722	-1.09722	-1.09722	-1.09722	-1.09722	-1.09722
chr10:23264543_23265043	1.32761	1.32761	1.32761	1.32761	1.32761	1.32761	0.862661	0.396129	-0.449615	-0.521984	-0.629199	-0.825846	-1.19261	-1.02843	-0.762793	-0.762793	-0.762793	-0.762793	-0.762793	-0.762793
chr22:29553597_29554097	1.23845	1.23845	1.23845	1.23845	1.23845	1.23845	0.776576	0.252628	0.151469	0.293866	-0.0498801	-0.55706	-1.30491	-0.871984	-1.02024	-1.02024	-1.02024	-1.02024	-1.02024	-1.02024
chr11:64810421_64810921	1.34395	1.34395	1.34395	1.34395	1.34395	1.34395	0.970727	-0.284016	-0.509128	-0.287236	-0.73336	-1.01981	-1.34359	-0.889393	-0.661315	-0.661315	-0.661315	-0.661315	-0.661315	-0.661315
chr1:113758915_113759415	1.15497	1.15497	1.15497	1.15497	1.15497	1.15497	0.962818	0.781446	0.353451	0.105196	-0.269189	-0.320701	-0.947736	-1.00059	-1.09908	-1.09908	-1.09908	-1.09908	-1.09908	-1.09908
chr14:36661544_36662044	1.08586	1.08586	1.08586	1.08586	1.08586	1.08586	0.920625	0.670325	0.479054	0.424143	-0.0983557	-0.114164	-0.46743	-0.950563	-1.2298	-1.2298	-1.2298	-1.2298	-1.2298	-1.2298
chr21:33324637_33325137	1.15818	1.15818	1.15818	1.15818	1.15818	1.15818	0.695486	0.333208	0.174287	-0.00142127	0.131652	0.158253	-0.19531	-0.501273	-1.29066	-1.29066	-1.29066	-1.29066	-1.29066	-1.29066
chr4:38145192_38145692	1.14086	1.14086	1.14086	1.14086	1.14086	1.14086	0.391142	0.261056	0.506187	0.336348	0.375083	0.0340411	-0.333488	-0.758348	-1.27619	-1.27619	-1.27619	-1.27619	-1.27619	-1.27619
chr11:118689708_118690208	1.38385	1.38385	1.38385	1.38385	1.38385	1.38385	0.593476	0.0269968	-0.188718	-0.51257	-0.680886	-0.775569	-0.61089	-0.794689	-0.893372	-0.893372	-0.893372	-0.893372	-0.893372	-0.893372
chr2:14632408_14632908	1.08941	1.08941	1.08941	1.08941	1.08941	1.08941	0.715369	0.73099	0.302108	0.345223	-0.0362401	-0.11485	-0.192149	-0.376381	-1.31842	-1.31842	-1.31842	-1.31842	-1.31842	-1.31842
chr2:66508519_66509019	1.17828	1.17828	1.17828	1.17828	1.17828	1.17828	1.0676	0.767319	0.341561	-0.252487	-0.398297	-0.529544	-0.636284	-0.89696	-1.08877	-1.08877	-1.08877	-1.08877	-1.08877	-1.08877
chr4:121870261_121870761	1.3295	1.3295	1.3295	1.3295	1.3295	1.3295	0.339095	-0.225878	0.0258073	0.105266	-0.19723	-0.410903	-0.279833	-0.586367	-1.12449	-1.12449	-1.12449	-1.12449	-1.12449	-1.12449
chr7:108723234_108723734	1.31196	1.31196	1.31196	1.31196	1.31196	1.31196	0.397057	0.067306	0.312999	0.0705878	-0.180011	-0.480447	-1.07899	-1.12637	-0.975646	-0.975646	-0.975646	-0.975646	-0.975646	-0.975646
chr7:150335723_150336223	1.23863	1.23863	1.23863	1.23863	1.23863	1.23863	0.872573	0.210435	0.033075	0.033075	0.147904	-0.412389	-0.693762	-1.19418	-1.07142	-1.07142	-1.07142	-1.07142	-1.07142	-1.07142
chr2:8081007_8081507	1.30171	1.30171	1.30171	1.30171	1.30171	1.30171	0.829802	0.359929	-0.0707121	-0.395936	-0.395936	-0.395936	-0.765327	-1.03468	-0.990248	-0.990248	-0.990248	-0.990248	-0.990248	-0.990248
chr10:80453947_80454447	1.14586	1.14586	1.14586	1.14586	1.14586	1.14586	1.13732	0.452111	0.601156	0.0371919	-0.159049	-0.521047	-0.836606	-1.27613	-1.05168	-1.05168	-1.05168	-1.05168	-1.05168	-1.05168
chr7:4472600_4473100	1.19639	1.19639	1.19639	1.19639	1.19639	1.19639	0.731131	0.56606	0.507194	0.197732	-0.157919	-0.666505	-1.28045	-1.00993	-1.01094	-1.01094	-1.01094	-1.01094	-1.01094	-1.01094
chr4:24583753_24584253	1.43674	1.43674	1.43674	1.43674	1.43674	1.43674	0.334353	-0.501835	-0.414994	-0.470359	-0.421114	-0.792352	-0.736464	-0.840695	-0.796164	-0.796164	-0.796164	-0.796164	-0.796164	-0.796164
chr1:197201151_197201651	1.26665	1.26665	1.26665	1.26665	1.26665	1.26665	1.17244	0.485644	-0.249454	-0.426501	-0.616786	-1.12874	-0.717655	-0.903595	-0.869203	-0.869203	-0.869203	-0.869203	-0.869203	-0.869203
chr4:158671994_158672494	1.2691	1.2691	1.2691	1.2691	1.2691	1.2691	0.651889	0.69213	0.271432	-0.339192	-1.16522	-0.764212	-1.22153	-1.11703	-0.770484	-0.770484	-0.770484	-0.770484	-0.770484	-0.770484
chr11:71452827_71453327	1.16475	1.16475	1.16475	1.16475	1.16475	1.16475	0.85475	0.370155	0.405089	0.307172	0.149764	-0.51297	-0.5717	-1.141	-1.14162	-1.14162	-1.14162	-1.14162	-1.14162	-1.14162
chr20:1392892_1393392	1.08162	1.08162	1.08162	1.08162	1.08162	1.08162	0.940625	0.714322	0.508016	0.26381	-0.0561505	-0.317263	-0.151122	-0.953002	-1.23983	-1.23983	-1.23983	-1.23983	-1.23983	-1.23983
chr18:80033901_80034401	1.23644	1.23644	1.23644	1.23644	1.23644	1.23644	0.852888	0.83523	0.063199	-0.387856	-0.504628	-0.41265	-0.774738	-1.20136	-0.981451	-0.981451	-0.981451	-0.981451	-0.981451	-0.981451
chr10:24724572_24725072	1.29291	1.29291	1.29291	1.29291	1.29291	1.29291	0.762481	0.509495	0.0878586	-0.44468	-0.859953	-0.847183	-0.28847	-1.06561	-0.93523	-0.93523	-0.93523	-0.93523	-0.93523	-0.93523
chr3:184363069_184363569	1.26346	1.26346	1.26346	1.26346	1.26346	1.26346	0.962851	0.348393	0.289249	-0.104948	-0.726474	-0.954577	-0.978357	-0.931977	-0.914156	-0.914156	-0.914156	-0.914156	-0.914156	-0.914156
chr7:118183896_118184396	1.20843	1.20843	1.20843	1.20843	1.20843	1.20843	0.837571	0.584453	0.277628	0.134941	-0.170134	-0.799336	-0.823119	-0.675	-1.10293	-1.10293	-1.10293	-1.10293	-1.10293	-1.10293
chr5:132829867_132830367	1.1503	1.1503	1.1503	1.1503	1.1503	1.1503	0.895971	0.42355	0.510662	0.339037	-0.110168	-0.40149	-0.520639	-0.996022	-1.17378	-1.17378	-1.17378	-1.17378	-1.17378	-1.17378
chr3:57755975_57756475	1.14756	1.14756	1.14756	1.14756	1.14756	1.14756	1.09419	0.52414	0.0910311	0.0354768	-0.134521	0.0223389	-0.408854	-0.979577	-1.18826	-1.18826	-1.18826	-1.18826	-1.18826	-1.18826
chr20:2799805_2800305	1.06866	1.06866	1.06866	1.06866	1.06866	1.06866	0.936416	0.936416	0.629176	-0.0327443	-0.0327443	-0.2484	-0.44482	-0.715958	-1.23988	-1.23988	-1.23988	-1.23988	-1.23988	-1.23988
chr7:135714599_135715099	1.20959	1.20959	1.20959	1.20959	1.20959	1.20959	1.15614	0.48923	0.0473389	-0.204221	-0.305142	-0.486788	-0.486788	-0.824284	-1.10717	-1.10717	-1.10717	-1.10717	-1.10717	-1.10717
chr18:3012904_3013404	1.27838	1.27838	1.27838	1.27838	1.27838	1.27838	1.20306	0.205841	-0.317245	-0.206102	-0.772874	-0.801271	-0.788757	-1.32018	-0.812124	-0.812124	-0.812124	-0.812124	-0.812124	-0.812124
chr18:49460448_49460948	1.20166	1.20166	1.20166	1.20166	1.20166	1.20166	1.14816	0.921094	-0.679176	-0.767459	-0.799026	-0.729711	-0.0643001	-0.318825	-0.986784	-0.986784	-0.986784	-0.986784	-0.986784	-0.986784
chr22:40951709_40952209	1.2607	1.2607	1.2607	1.2607	1.2607	1.2607	0.888767	0.31523	-0.122737	-0.298194	-0.399226	0.0156776	-0.416568	-1.05997	-1.08119	-1.08119	-1.08119	-1.08119	-1.08119	-1.08119
chr2:219460500_219461000	1.37885	1.37885	1.37885	1.37885	1.37885	1.37885	0.534427	-0.306709	-0.625176	-0.680868	-0.0469864	-0.117702	-0.620754	-0.639965	-0.96156	-0.96156	-0.96156	-0.96156	-0.96156	-0.96156
chr18:74147592_74148092	1.2674	1.2674	1.2674	1.2674	1.2674	1.2674	0.790758	0.718383	-0.175343	-0.278295	-0.488853	-0.504915	-0.504915	-0.843394	-1.05297	-1.05297	-1.05297	-1.05297	-1.05297	-1.05297
chr2:213151409_213151909	1.17818	1.17818	1.17818	1.17818	1.17818	1.17818	1.08326	0.595333	0.617155	-0.100264	-0.58915	-0.805681	-1.00278	-0.870374	-0.999432	-0.999432	-0.999432	-0.999432	-0.999432	-0.999432
chr8:122864647_122865147	1.00571	1.00571	1.00571	1.00571	1.00571	1.00571	0.920351	0.920351	0.275284	0.785791	0.502365	-0.478676	-1.156	-1.26505	-1.08978	-1.08978	-1.08978	-1.08978	-1.08978	-1.08978
chr9:99821522_99822022	1.18111	1.18111	1.18111	1.18111	1.18111	1.18111	0.713664	0.314418	0.366677	0.252448	-0.0346592	-0.0737205	-0.427018	-1.0043	-1.19902	-1.19902	-1.19902	-1.19902	-1.19902	-1.19902
chr14:32076619_32077119	1.24813	1.24813	1.24813	1.24813	1.24813	1.24813	1.17842	0.468914	0.0332974	-0.421055	-0.652576	-0.579932	-0.78246	-1.07443	-0.943159	-0.943159	-0.943159	-0.943159	-0.943159	-0.943159
chr3:194583692_194584192	1.26565	1.26565	1.26565	1.26565	1.26565	1.26565	0.687735	0.212405	-0.102157	-0.415078	-0.298901	-0.0473145	-0.0905853	-0.444736	-1.18254	-1.18254	-1.18254	-1.18254	-1.18254	-1.18254
chr11:60121137_60121637	1.17549	1.17549	1.17549	1.17549	1.17549	1.17549	1.17549	0.840869	0.0472475	-0.205529	-0.402481	-0.454931	-0.731787	-1.15247	-1.02822	-1.02822	-1.02822	-1.02822	-1.02822	-1.02822
chr13:23579050_23579550	1.2195	1.2195	1.2195	1.2195	1.2195	1.2195	0.95301	0.636049	0.211009	-0.455005	-0.87363	-0.395288	-0.231885	-0.595565	-1.09428	-1.09428	-1.09428	-1.09428	-1.09428	-1.09428
chr16:67846490_67846990	1.16197	1.16197	1.16197	1.16197	1.16197	1.16197	0.778104	0.2716	0.737935	0.283296	-0.195816	-0.45353	-0.510601	-0.698623	-1.19737	-1.19737	-1.19737	-1.19737	-1.19737	-1.19737
chr8:66667069_66667569	1.27806	1.27806	1.27806	1.27806	1.27806	1.27806	0.757288	0.335081	0.302761	-0.152319	-0.600836	-0.47934	-0.626465	-1.01094	-1.03227	-1.03227	-1.03227	-1.03227	-1.03227	-1.03227
chr4:151016088_151016588	1.04115	1.04115	1.04115	1.04115	1.04115	1.04115	0.928545	0.944442	0.884808	0.100776	-0.354217	-0.309219	-0.663246	-0.368455	-1.23505	-1.23505	-1.23505	-1.23505	-1.23505	-1.23505
chr9:12776250_12776750	1.29273	1.29273	1.29273	1.29273	1.29273	1.29273	0.813841	0.558332	-0.0122163	-0.225077	-0.787336	-0.826528	-0.869934	-1.05707	-0.891727	-0.891727	-0.891727	-0.891727	-0.891727	-0.891727
chr10:132387772_132388272	1.35963	1.35963	1.35963	1.35963	1.35963	1.35963	0.711977	-0.128064	-0.231519	-0.404898	-0.514577	-0.293508	-0.573788	-1.11977	-0.933942	-0.933942	-0.933942	-0.933942	-0.933942	-0.933942
chr2:22690080_22690580	1.28314	1.28314	1.28314	1.28314	1.28314	1.28314	1.22919	0.381159	-0.518298	-0.518298	-0.66707	-0.994125	-0.662119	-0.849894	-0.849894	-0.849894	-0.849894	-0.849894	-0.849894	-0.849894
chr20:2162662_2163162	1.17236	1.17236	1.17236	1.17236	1.17236	1.17236	1.17236	0.640648	0.0690591	-0.104479	-0.302338	-0.485705	-0.519964	-0.555132	-1.1581	-1.1581	-1.1581	-1.1581	-1.1581	-1.1581
chr10:69888920_69889420	1.2346	1.2346	1.2346	1.2346	1.2346	1.2346	0.653764	0.176033	0.264123	0.016976	0.13374	-0.371937	-0.474094	-0.66159	-1.19076	-1.19076	-1.19076	-1.19076	-1.19076	-1.19076
chr5:141747108_141747608	1.15866	1.15866	1.15866	1.15866	1.15866	1.15866	0.781014	0.920044	0.373119	0.034394	-0.163506	-0.343823	-0.85117	-1.03949	-1.11042	-1.11042	-1.11042	-1.11042	-1.11042	-1.11042
chr14:70188646_70189146	1.25368	1.25368	1.25368	1.25368	1.25368	1.25368	0.996465	0.59507	-0.492134	-0.354138	-0.326164	-0.289698	-0.651049	-0.546431	-1.07566	-1.07566	-1.07566	-1.07566	-1.07566	-1.07566
chr19:7533841_7534341	1.20242	1.20242	1.20242	1.20242	1.20242	1.20242	0.721924	0.515842	0.285188	0.512543	-0.248956	-0.693601	-1.05543	-1.17821	-1.01231	-1.01231	-1.01231	-1.01231	-1.01231	-1.01231
chr3:50337247_50337747	1.31198	1.31198	1.31198	1.31198	1.31198	1.31198	0.406362	0.434218	0.00678587	0.0255722	-0.604242	-0.577008	-0.490676	-0.563932	-1.08482	-1.08482	-1.08482	-1.08482	-1.08482	-1.08482
chr2:112054874_112055374	1.03149	1.03149	1.03149	1.03149	1.03149	1.03149	0.834491	0.856817	0.617118	0.093663	0.207798	0.10555	-0.279453	-1.05533	-1.2616	-1.2616	-1.2616	-1.2616	-1.2616	-1.2616
chr1:26171681_26172181	1.17515	1.17515	1.17515	1.17515	1.17515	1.17515	0.709236	1.14349	0.0540429	-0.566579	-0.339357	-0.37871	-0.30554	-0.415518	-1.15866	-1.15866	-1.15866	-1.15866	-1.15866	-1.15866
chr10:78963546_78964046	1.36343	1.36343	1.36343	1.36343	1.36343	1.36343	0.349704	0.276594	-0.649523	-0.273249	-0.325068	-0.132351	-0.588889	-0.938403	-0.983231	-0.983231	-0.983231	-0.983231	-0.983231	-0.983231
chr3:194103926_194104426	1.19296	1.19296	1.19296	1.19296	1.19296	1.19296	1.1226	0.642872	-0.157818	-0.104122	-0.150768	-0.307561	-0.684699	-0.794897	-1.12056	-1.12056	-1.12056	-1.12056	-1.12056	-1.12056
chr2:71156403_71156903	1.25067	1.25067	1.25067	1.25067	1.25067	1.25067	0.733222	0.865744	-0.0617243	-0.552998	-0.646587	-0.297133	-0.61949	-0.501966	-1.07052	-1.07052	-1.07052	-1.07052	-1.07052	-1.07052
chr9:33447275_33447775	1.18691	1.18691	1.18691	1.18691	1.18691	1.18691	0.807441	0.673852	0.362001	0.187588	-0.232109	-0.434472	-0.971373	-0.935006	-1.09657	-1.09657	-1.09657	-1.09657	-1.09657	-1.09657
chr2:112542158_112542658	1.27121	1.27121	1.27121	1.27121	1.27121	1.27121	0.893825	0.520983	-0.0541711	-0.128732	-0.388206	-0.749063	-0.761843	-1.03325	-0.9878	-0.9878	-0.9878	-0.9878	-0.9878	-0.9878
chr22:22508549_22509049	1.34046	1.34046	1.34046	1.34046	1.34046	1.34046	0.659881	0.0341984	-0.278195	-0.0233598	-0.31391	-0.533183	-0.732898	-0.732898	-1.0204	-1.0204	-1.0204	-1.0204	-1.0204	-1.0204
chr19:44448265_44448765	1.10308	1.10308	1.10308	1.10308	1.10308	1.10308	0.968588	0.38619	0.222662	0.195535	0.195535	-0.0237898	-0.133477	-0.683793	-1.29099	-1.29099	-1.29099	-1.29099	-1.29099	-1.29099
chr2:112764659_112765159	1.27304	1.27304	1.27304	1.27304	1.27304	1.27304	0.688041	0.825871	-0.0802366	-0.695819	-0.258632	-0.705816	-0.749618	-0.578082	-1.01399	-1.01399	-1.01399	-1.01399	-1.01399	-1.01399
chr17:44141632_44142132	1.24631	1.24631	1.24631	1.24631	1.24631	1.24631	0.987276	0.506108	-0.0446907	-0.333328	-0.305157	-0.613666	-0.378903	-0.72208	-1.09557	-1.09557	-1.09557	-1.09557	-1.09557	-1.09557
chr1:46604072_46604572	1.21384	1.21384	1.21384	1.21384	1.21384	1.21384	0.838728	0.631348	0.0552735	0.321544	-0.36383	-0.625551	-0.669378	-1	-1.07853	-1.07853	-1.07853	-1.07853	-1.07853	-1.07853
chr10:13822462_13822962	1.1387	1.1387	1.1387	1.1387	1.1387	1.1387	0.869008	0.610911	0.610911	0.277539	-0.182647	-0.402248	-0.693961	-1.13167	-1.13167	-1.13167	-1.13167	-1.13167	-1.13167	-1.13167
chr20:33993653_33994153	1.24342	1.24342	1.24342	1.24342	1.24342	1.24342	0.611796	-0.007356	0.345913	0.133607	-0.2878	-0.128772	-0.330466	-0.592369	-1.20084	-1.20084	-1.20084	-1.20084	-1.20084	-1.20084
chr13:27270512_27271012	1.11783	1.11783	1.11783	1.11783	1.11783	1.11783	0.531553	0.674419	0.510493	0.176728	-0.114599	0.197538	-0.314513	-0.673792	-1.28247	-1.28247	-1.28247	-1.28247	-1.28247	-1.28247
chr7:100436360_100436860	1.32346	1.32346	1.32346	1.32346	1.32346	1.32346	0.655623	0.173237	-0.151044	-0.422007	-0.27495	-0.17728	-0.73741	-1.37734	-0.938267	-0.938267	-0.938267	-0.938267	-0.938267	-0.938267
chr18:32470564_32471064	1.35004	1.35004	1.35004	1.35004	1.35004	1.35004	0.727358	0.221286	-0.597611	-0.621189	-0.328169	-0.743566	-0.656503	-0.337651	-0.960702	-0.960702	-0.960702	-0.960702	-0.960702	-0.960702
chr17:38967313_38967813	1.02103	1.02103	1.02103	1.02103	1.02103	1.02103	0.760979	0.760979	0.596764	0.491971	0.491971	-0.399458	-0.309005	-0.895805	-1.27077	-1.27077	-1.27077	-1.27077	-1.27077	-1.27077
chr6:34514557_34515057	1.07653	1.07653	1.07653	1.07653	1.07653	1.07653	0.890868	0.449097	0.608639	0.581395	0.0837734	-0.427594	-0.48005	-0.582496	-1.2638	-1.2638	-1.2638	-1.2638	-1.2638	-1.2638
chr4:70704490_70704990	1.4091	1.4091	1.4091	1.4091	1.4091	1.4091	0.240251	-0.0188082	-0.047056	-0.879172	-0.478884	-0.485834	-0.691831	-0.802882	-0.881734	-0.881734	-0.881734	-0.881734	-0.881734	-0.881734
chr4:84582639_84583139	1.11555	1.11555	1.11555	1.11555	1.11555	1.11555	1.08178	1.09792	0.401242	-0.146851	-0.27665	-0.574818	-1.0644	-1.1	-1.01859	-1.01859	-1.01859	-1.01859	-1.01859	-1.01859
chr4:122152090_122152590	1.31903	1.31903	1.31903	1.31903	1.31903	1.31903	0.730827	0.247028	-0.196376	-0.301329	-0.380337	-0.572175	-0.362266	-0.761156	-1.05307	-1.05307	-1.05307	-1.05307	-1.05307	-1.05307
chr21:33588472_33588972	1.29346	1.29346	1.29346	1.29346	1.29346	1.29346	0.916399	0.455109	-0.35261	-0.632593	-0.866187	-1.16461	-1.232	-1.25163	-0.605439	-0.605439	-0.605439	-0.605439	-0.605439	-0.605439
chr1:183471732_183472232	1.34335	1.34335	1.34335	1.34335	1.34335	1.34335	0.698252	0.076419	-0.270989	-0.206768	-0.491177	-0.539911	-0.417146	-0.808142	-1.01677	-1.01677	-1.01677	-1.01677	-1.01677	-1.01677
chr19:53881890_53882390	1.11333	1.11333	1.11333	1.11333	1.11333	1.11333	1.11333	0.881209	0.301852	-0.107567	-0.107567	-0.328323	-0.529387	-0.806936	-1.18276	-1.18276	-1.18276	-1.18276	-1.18276	-1.18276
chr17:47725514_47726014	0.924741	0.924741	0.924741	0.924741	0.924741	0.924741	0.870056	0.735329	0.824609	0.489483	0.51783	0.164622	-0.378253	-0.81827	-1.32564	-1.32564	-1.32564	-1.32564	-1.32564	-1.32564
chr19:57632883_57633383	1.26048	1.26048	1.26048	1.26048	1.26048	1.26048	1.0892	0.290872	0.108086	-0.506359	-0.276567	-0.444748	-0.958893	-0.932146	-0.988722	-0.988722	-0.988722	-0.988722	-0.988722	-0.988722
chr2:97995687_97996187	1.25536	1.25536	1.25536	1.25536	1.25536	1.25536	0.952881	0.693248	-0.277449	-0.19525	-0.487966	-0.943666	-0.464192	-0.724557	-1.0142	-1.0142	-1.0142	-1.0142	-1.0142	-1.0142
chr10:86756244_86756744	1.28645	1.28645	1.28645	1.28645	1.28645	1.28645	0.678152	0.276986	0.399668	-0.0222285	-0.567634	-0.74324	-0.951739	-0.880699	-0.984663	-0.984663	-0.984663	-0.984663	-0.984663	-0.984663
chr2:206782707_206783207	1.2645	1.2645	1.2645	1.2645	1.2645	1.2645	0.777319	0.190038	-0.0335976	-0.138826	0.0909663	-0.488264	-0.501161	-0.608516	-1.14582	-1.14582	-1.14582	-1.14582	-1.14582	-1.14582
chr9:75890358_75890858	1.27947	1.27947	1.27947	1.27947	1.27947	1.27947	0.79211	0.569702	0.121072	-0.360569	-0.594798	-0.623485	-0.580075	-1.02107	-0.996618	-0.996618	-0.996618	-0.996618	-0.996618	-0.996618
chr5:61331656_61332156	1.38424	1.38424	1.38424	1.38424	1.38424	1.38424	0.371466	0.329635	-0.270635	-0.679024	-0.699364	-0.454847	-0.718205	-0.683673	-0.916798	-0.916798	-0.916798	-0.916798	-0.916798	-0.916798
chr19:18995731_18996231	0.882564	0.882564	0.882564	0.882564	0.882564	0.882564	0.827754	0.850389	0.789618	0.643024	0.57926	-0.00023137	-0.294152	-0.484615	-1.36774	-1.36774	-1.36774	-1.36774	-1.36774	-1.36774
chr14:61609316_61609816	1.42018	1.42018	1.42018	1.42018	1.42018	1.42018	0.567672	-0.527164	-0.560131	-0.624828	-0.564583	-0.740889	-0.857788	-1.04919	-0.694026	-0.694026	-0.694026	-0.694026	-0.694026	-0.694026
chr17:44326677_44327177	1.25089	1.25089	1.25089	1.25089	1.25089	1.25089	0.969509	0.561193	0.234467	-0.247937	-0.910556	-1.10328	-1.0456	-0.985876	-0.82954	-0.82954	-0.82954	-0.82954	-0.82954	-0.82954
chr8:102239003_102239503	1.27441	1.27441	1.27441	1.27441	1.27441	1.27441	0.513006	-0.681366	-0.971674	-1.5	-1.39992	-1.28822	-1.16498	-0.474043	-0.109887	-0.109887	-0.109887	-0.109887	-0.109887	-0.109887
chr3:66317937_66318437	1.12043	1.12043	1.12043	1.12043	1.12043	1.12043	0.729958	0.266509	0.356862	0.13981	0.372342	-0.135169	0.000893872	-0.659462	-1.29905	-1.29905	-1.29905	-1.29905	-1.29905	-1.29905
chr1:109041931_109042431	1.02049	1.02049	1.02049	1.02049	1.02049	1.02049	0.833544	0.97289	0.867441	0.501035	-0.20845	-0.452364	-0.444148	-0.921149	-1.21195	-1.21195	-1.21195	-1.21195	-1.21195	-1.21195
chr1:201268425_201268925	1.23715	1.23715	1.23715	1.23715	1.23715	1.23715	0.955484	0.578098	0.26207	-0.289424	-0.909477	-1.28423	-1.30873	-0.909383	-0.752886	-0.752886	-0.752886	-0.752886	-0.752886	-0.752886
chr15:55318941_55319441	1.25586	1.25586	1.25586	1.25586	1.25586	1.25586	0.770923	0.284333	0.284333	0.10756	-0.186412	-0.694327	-0.811469	-1.00244	-1.04794	-1.04794	-1.04794	-1.04794	-1.04794	-1.04794
chr1:15326612_15327112	1.27053	1.27053	1.27053	1.27053	1.27053	1.27053	0.781677	0.29493	0.111178	-0.0717683	-0.273381	-0.460226	-0.495134	-0.984932	-1.08759	-1.08759	-1.08759	-1.08759	-1.08759	-1.08759
chr7:132226699_132227199	1.15314	1.15314	1.15314	1.15314	1.15314	1.15314	0.773782	0.673273	0.357009	0.0981754	0.0981754	-0.267351	-0.650117	-0.748359	-1.2089	-1.2089	-1.2089	-1.2089	-1.2089	-1.2089
chr4:70722319_70722819	1.31593	1.31593	1.31593	1.31593	1.31593	1.31593	0.626499	0.0366651	0.169205	0.0299291	-0.435547	-0.435547	-0.818545	-1.00975	-1.00975	-1.00975	-1.00975	-1.00975	-1.00975	-1.00975
chr7:44309679_44310179	1.22137	1.22137	1.22137	1.22137	1.22137	1.22137	1.16633	0.67906	0.224028	-0.578221	-0.780052	-0.742861	-0.767396	-0.870725	-0.943062	-0.943062	-0.943062	-0.943062	-0.943062	-0.943062
chr14:102516789_102517289	1.11863	1.11863	1.11863	1.11863	1.11863	1.11863	1.06359	0.685609	0.519954	-0.0324165	-0.184201	-0.324261	-0.441572	-0.789121	-1.20156	-1.20156	-1.20156	-1.20156	-1.20156	-1.20156
chr2:62705374_62705874	1.30592	1.30592	1.30592	1.30592	1.30592	1.30592	0.763419	0.313766	0.189987	-0.49224	-1.32293	-1.11868	-0.979127	-0.74083	-0.741476	-0.741476	-0.741476	-0.741476	-0.741476	-0.741476
chr2:118607322_118607822	1.11151	1.11151	1.11151	1.11151	1.11151	1.11151	0.849026	0.762395	0.701338	0.337208	-0.0451627	-0.824394	-0.928655	-1.29193	-1.03815	-1.03815	-1.03815	-1.03815	-1.03815	-1.03815
chr2:676644_677144	1.27393	1.27393	1.27393	1.27393	1.27393	1.27393	1.23368	-0.095045	-0.146291	-0.358429	-0.23805	-0.341245	-0.935087	-0.965035	-0.966346	-0.966346	-0.966346	-0.966346	-0.966346	-0.966346
chr5:171387504_171388004	1.23489	1.23489	1.23489	1.23489	1.23489	1.23489	0.332646	0.982886	0.0223237	-0.3651	0.087183	-0.192818	-0.912652	-1.1675	-1.03272	-1.03272	-1.03272	-1.03272	-1.03272	-1.03272
chr2:73297260_73297760	1.20726	1.20726	1.20726	1.20726	1.20726	1.20726	0.933881	0.555166	0.389192	-0.0954085	-0.159559	-0.676356	-0.883264	-0.903062	-1.06736	-1.06736	-1.06736	-1.06736	-1.06736	-1.06736
chr12:57583240_57583740	1.34516	1.34516	1.34516	1.34516	1.34516	1.34516	0.562073	0.300403	-0.0167892	-0.234783	-0.929951	-0.689712	-0.714299	-0.654295	-0.948934	-0.948934	-0.948934	-0.948934	-0.948934	-0.948934
chr3:52897394_52897894	0.955299	0.955299	0.955299	0.955299	0.955299	0.955299	0.900125	0.92291	0.945371	0.325427	0.242481	0.0828151	-0.614201	-1.13122	-1.23425	-1.23425	-1.23425	-1.23425	-1.23425	-1.23425
chr10:5944300_5944800	1.31048	1.31048	1.31048	1.31048	1.31048	1.31048	0.734622	0.472723	0.155254	-0.528704	-0.844363	-0.963808	-1.08147	-0.829594	-0.829594	-0.829594	-0.829594	-0.829594	-0.829594	-0.829594
chr21:43362214_43362714	1.23631	1.23631	1.23631	1.23631	1.23631	1.23631	1.1811	0.591511	0.0320084	-0.522034	-0.674278	-0.628093	-0.833979	-1.24593	-0.886359	-0.886359	-0.886359	-0.886359	-0.886359	-0.886359
chr15:29914601_29915101	1.31356	1.31356	1.31356	1.31356	1.31356	1.31356	0.440476	-0.0630653	0.193765	0.166143	-0.262056	-0.402839	-0.606246	-0.798658	-1.09148	-1.09148	-1.09148	-1.09148	-1.09148	-1.09148
chr7:65981994_65982494	1.253	1.253	1.253	1.253	1.253	1.253	0.863396	0.483313	0.483313	-0.369793	-1.1252	-1.14472	-0.908891	-0.68715	-0.852043	-0.852043	-0.852043	-0.852043	-0.852043	-0.852043
chr17:64975376_64975876	1.25259	1.25259	1.25259	1.25259	1.25259	1.25259	1.12348	0.461105	0.011721	-0.17257	-0.736	-0.972807	-1.12434	-0.823195	-0.880488	-0.880488	-0.880488	-0.880488	-0.880488	-0.880488
chr13:49443913_49444413	1.2592	1.2592	1.2592	1.2592	1.2592	1.2592	1.20382	0.374163	-0.121103	-0.443914	-1.18815	-1.22675	-0.929368	-0.6703	-0.758937	-0.758937	-0.758937	-0.758937	-0.758937	-0.758937
chr4:173169476_173169976	1.27499	1.27499	1.27499	1.27499	1.27499	1.27499	0.892888	0.630092	-0.0765178	-0.194398	-0.798205	-0.860372	-0.723131	-0.759236	-0.960181	-0.960181	-0.960181	-0.960181	-0.960181	-0.960181
chr6:117602320_117602820	1.17773	1.17773	1.17773	1.17773	1.17773	1.17773	0.913603	0.53304	0.586992	0.172125	-0.256775	-0.844572	-1.22258	-1.10248	-0.974284	-0.974284	-0.974284	-0.974284	-0.974284	-0.974284
chr7:66681863_66682363	1.23265	1.23265	1.23265	1.23265	1.23265	1.23265	1.17721	0.143014	-0.0715318	-0.048178	-0.201085	-0.410933	-0.529112	-0.879229	-1.09601	-1.09601	-1.09601	-1.09601	-1.09601	-1.09601
chr5:138331687_138332187	1.16314	1.16314	1.16314	1.16314	1.16314	1.16314	1.07486	0.722688	0.0308171	0.321994	-0.324083	-0.427989	-0.865102	-1.11735	-1.06578	-1.06578	-1.06578	-1.06578	-1.06578	-1.06578
chr13:44373941_44374441	1.25264	1.25264	1.25264	1.25264	1.25264	1.25264	0.968329	0.705168	-0.00242326	-0.256484	-0.926017	-1.11453	-0.93532	-0.654632	-0.883324	-0.883324	-0.883324	-0.883324	-0.883324	-0.883324
chr22:19723985_19724485	1.19551	1.19551	1.19551	1.19551	1.19551	1.19551	1.16585	0.784855	-0.0349366	-0.0349366	-0.584368	-0.722081	-1.17025	-0.76709	-0.968346	-0.968346	-0.968346	-0.968346	-0.968346	-0.968346
chr1:154936738_154937238	1.07887	1.07887	1.07887	1.07887	1.07887	1.07887	0.803821	0.940908	0.486768	0.163391	0.204091	-0.319056	-0.448053	-1.04476	-1.21006	-1.21006	-1.21006	-1.21006	-1.21006	-1.21006
chr1:205056248_205056748	1.26008	1.26008	1.26008	1.26008	1.26008	1.26008	0.579988	0.492706	0.617043	-0.191734	-0.592177	-0.895104	-0.675448	-0.731048	-1.02745	-1.02745	-1.02745	-1.02745	-1.02745	-1.02745
chr10:26860849_26861349	1.4234	1.4234	1.4234	1.4234	1.4234	1.4234	0.179423	0.044742	-0.483393	-0.41815	-0.471314	-1.06306	-0.925418	-0.907499	-0.749293	-0.749293	-0.749293	-0.749293	-0.749293	-0.749293
chr20:38893395_38893895	1.13279	1.13279	1.13279	1.13279	1.13279	1.13279	0.749468	0.749468	0.423888	0.31716	-0.1529	-0.341754	-0.354835	-0.952468	-1.2058	-1.2058	-1.2058	-1.2058	-1.2058	-1.2058
chr18:74148194_74148694	1.42306	1.42306	1.42306	1.42306	1.42306	1.42306	0.381505	-0.0688998	-0.778587	-0.759253	-0.70775	-0.932322	-1.03765	-0.662202	-0.662202	-0.662202	-0.662202	-0.662202	-0.662202	-0.662202
chr18:12377188_12377688	1.31157	1.31157	1.31157	1.31157	1.31157	1.31157	1.04456	0.181918	-0.311802	-0.719187	-0.417905	-0.455515	-0.624351	-1.0165	-0.925103	-0.925103	-0.925103	-0.925103	-0.925103	-0.925103
chr11:57460220_57460720	1.25309	1.25309	1.25309	1.25309	1.25309	1.25309	0.967797	0.585552	-0.124477	-0.124477	-0.555272	-0.652466	-0.578014	-0.677447	-1.05996	-1.05996	-1.05996	-1.05996	-1.05996	-1.05996
chr1:179882364_179882864	1.05857	1.05857	1.05857	1.05857	1.05857	1.05857	1.00426	0.791945	0.349353	0.347955	0.306623	-0.171255	-0.722474	-1.27584	-1.16366	-1.16366	-1.16366	-1.16366	-1.16366	-1.16366
chr20:17968720_17969220	1.19235	1.19235	1.19235	1.19235	1.19235	1.19235	1.13804	0.496688	0.056419	0.143653	-0.546094	-0.329557	-0.690252	-0.702794	-1.12004	-1.12004	-1.12004	-1.12004	-1.12004	-1.12004
chr20:50153533_50154033	1.24899	1.24899	1.24899	1.24899	1.24899	1.24899	0.929563	0.547296	-0.106478	-0.356206	-0.375493	-0.153481	-0.569495	-0.985252	-1.07073	-1.07073	-1.07073	-1.07073	-1.07073	-1.07073
chr1:70221085_70221585	1.09278	1.09278	1.09278	1.09278	1.09278	1.09278	1.05831	1.05831	0.737707	-0.0748992	-0.544208	-0.836314	-0.732427	-1.25814	-0.994167	-0.994167	-0.994167	-0.994167	-0.994167	-0.994167
chr2:121755259_121755759	1.18248	1.18248	1.18248	1.18248	1.18248	1.18248	1.04448	0.852788	0.391882	-0.126309	-0.733995	-0.970704	-1.0322	-0.971547	-0.924879	-0.924879	-0.924879	-0.924879	-0.924879	-0.924879
chr12:25194969_25195469	1.31655	1.31655	1.31655	1.31655	1.31655	1.31655	0.820791	0.4379	-0.591241	-0.145549	-0.49653	-0.59642	-0.806755	-0.75828	-0.960539	-0.960539	-0.960539	-0.960539	-0.960539	-0.960539
chr17:17694545_17695045	1.20373	1.20373	1.20373	1.20373	1.20373	1.20373	0.927189	0.377455	0.191009	0.26947	-0.11785	-0.43451	-1.01418	-0.772768	-1.10804	-1.10804	-1.10804	-1.10804	-1.10804	-1.10804
chr17:38925338_38925838	1.12486	1.12486	1.12486	1.12486	1.12486	1.12486	0.858942	0.594253	0.132989	0.132989	0.132989	0.0785029	-0.475323	-0.57499	-1.27158	-1.27158	-1.27158	-1.27158	-1.27158	-1.27158
chr12:54560317_54560817	1.18456	1.18456	1.18456	1.18456	1.18456	1.18456	0.918306	0.423726	0.0912495	0.326283	0.121425	-0.39483	-0.949365	-0.949365	-1.1158	-1.1158	-1.1158	-1.1158	-1.1158	-1.1158
chr5:18068610_18069110	1.19346	1.19346	1.19346	1.19346	1.19346	1.19346	0.807948	0.392269	0.070872	0.0429693	0.113074	-0.204167	-0.409638	-0.603827	-1.22838	-1.22838	-1.22838	-1.22838	-1.22838	-1.22838
chr7:44275963_44276463	1.30477	1.30477	1.30477	1.30477	1.30477	1.30477	0.807554	0.312486	0.144189	-0.604129	-0.552363	-0.739203	-0.424682	-1.20473	-0.927958	-0.927958	-0.927958	-0.927958	-0.927958	-0.927958
chr2:73737215_73737715	1.24238	1.24238	1.24238	1.24238	1.24238	1.24238	1.02657	0.328648	-0.0042511	-0.260439	-0.374245	-0.331497	-0.450713	-0.585309	-1.13384	-1.13384	-1.13384	-1.13384	-1.13384	-1.13384
chr1:172532751_172533251	1.20878	1.20878	1.20878	1.20878	1.20878	1.20878	0.866747	1.07373	-0.0777202	-0.606924	-0.368386	-0.616804	-0.510673	-0.640508	-1.06202	-1.06202	-1.06202	-1.06202	-1.06202	-1.06202
chr6:46652661_46653161	1.11673	1.11673	1.11673	1.11673	1.11673	1.11673	1.10435	0.985644	0.648092	-0.318576	-0.638564	-0.591749	-0.560538	-0.821568	-1.08458	-1.08458	-1.08458	-1.08458	-1.08458	-1.08458
chr6:83193062_83193562	1.09938	1.09938	1.09938	1.09938	1.09938	1.09938	1.00013	0.650882	0.187444	-0.110257	0.0362828	0.266165	-0.441921	-0.55592	-1.27151	-1.27151	-1.27151	-1.27151	-1.27151	-1.27151
chr4:4859319_4859819	1.31193	1.31193	1.31193	1.31193	1.31193	1.31193	0.91512	-0.130742	-0.192909	-0.0931153	-0.393035	-0.346126	-0.552282	-0.836859	-1.04027	-1.04027	-1.04027	-1.04027	-1.04027	-1.04027
chr14:23986560_23987060	0.951397	0.951397	0.951397	0.951397	0.951397	0.951397	0.747097	0.6446	0.852931	0.666314	0.718231	-0.176767	-0.810996	-0.721418	-1.2714	-1.2714	-1.2714	-1.2714	-1.2714	-1.2714
chrX:11758195_11758695	1.23695	1.23695	1.23695	1.23695	1.23695	1.23695	1.06119	0.564341	0.100368	-0.0801322	-0.635915	-1.05065	-0.735	-0.930333	-0.952594	-0.952594	-0.952594	-0.952594	-0.952594	-0.952594
chrX:140503829_140504329	1.13757	1.13757	1.13757	1.13757	1.13757	1.13757	1.13757	0.871318	0.177196	-0.0033104	-0.209115	-0.330546	-0.887646	-1.08299	-1.08299	-1.08299	-1.08299	-1.08299	-1.08299	-1.08299
chr17:21213972_21214472	1.08598	1.08598	1.08598	1.08598	1.08598	1.08598	0.869353	0.694792	0.242669	0.266317	0.246882	-0.406988	-0.0747283	-0.64342	-1.28513	-1.28513	-1.28513	-1.28513	-1.28513	-1.28513
chr15:48975692_48976192	1.27149	1.27149	1.27149	1.27149	1.27149	1.27149	1.00367	0.653573	-0.248294	-0.668972	-0.433782	-0.624752	-0.624752	-0.995414	-0.948374	-0.948374	-0.948374	-0.948374	-0.948374	-0.948374
chr6:44275871_44276371	1.38723	1.38723	1.38723	1.38723	1.38723	1.38723	0.546658	0.0490472	-0.28998	-0.440296	-0.73262	-1.11591	-0.549577	-0.826679	-0.827338	-0.827338	-0.827338	-0.827338	-0.827338	-0.827338
chr7:129948776_129949276	1.25326	1.25326	1.25326	1.25326	1.25326	1.25326	0.865222	0.478916	0.27498	-0.219334	-0.520213	-0.575148	-0.575148	-0.860634	-1.0647	-1.0647	-1.0647	-1.0647	-1.0647	-1.0647
chr10:116744390_116744890	1.13461	1.13461	1.13461	1.13461	1.13461	1.13461	0.528936	0.545565	0.545565	0.0511149	0.387636	-0.207224	-0.332865	-0.785585	-1.2568	-1.2568	-1.2568	-1.2568	-1.2568	-1.2568
chr19:47718870_47719370	1.12286	1.12286	1.12286	1.12286	1.12286	1.12286	0.854631	0.854631	0.284283	0.103276	-0.0519191	-0.279089	-0.399036	-0.68465	-1.23655	-1.23655	-1.23655	-1.23655	-1.23655	-1.23655
chr5:139669873_139670373	1.29851	1.29851	1.29851	1.29851	1.29851	1.29851	0.901828	0.215419	-0.919844	-1.01181	-1.40307	-1.30206	-0.955259	-0.545751	-0.461754	-0.461754	-0.461754	-0.461754	-0.461754	-0.461754
chr3:64023309_64023809	1.30381	1.30381	1.30381	1.30381	1.30381	1.30381	0.802574	0.383298	-0.187994	-0.26541	-0.472128	-0.369605	-0.665458	-0.943373	-1.01746	-1.01746	-1.01746	-1.01746	-1.01746	-1.01746
chr1:223647956_223648456	1.24523	1.24523	1.24523	1.24523	1.24523	1.24523	0.976515	0.589329	0.00591823	-0.0871207	-0.388685	-0.6832	-0.98552	-0.98552	-0.98552	-0.98552	-0.98552	-0.98552	-0.98552	-0.98552
chr12:94534975_94535475	1.32215	1.32215	1.32215	1.32215	1.32215	1.32215	0.820648	0.401151	-0.378078	-0.7068	-0.167764	-0.702575	-0.727717	-0.924535	-0.924535	-0.924535	-0.924535	-0.924535	-0.924535	-0.924535
chr11:134289783_134290283	1.10164	1.10164	1.10164	1.10164	1.10164	1.10164	1.10164	0.39746	0.39746	0.215946	-0.175892	-0.0392109	-0.432006	-0.432006	-1.27387	-1.27387	-1.27387	-1.27387	-1.27387	-1.27387
chr7:33129110_33129610	1.20192	1.20192	1.20192	1.20192	1.20192	1.20192	0.357694	-0.6144	-1.06317	-1.48029	-1.46567	-0.998637	-1.5	-0.983691	0.0943312	0.0943312	0.0943312	0.0943312	0.0943312	0.0943312
chr1:197916913_197917413	1.14136	1.14136	1.14136	1.14136	1.14136	1.14136	0.872132	0.604144	0.604144	0.257997	-0.134203	-0.579403	-0.579403	-0.952011	-1.15693	-1.15693	-1.15693	-1.15693	-1.15693	-1.15693
chr5:115180105_115180605	1.20875	1.20875	1.20875	1.20875	1.20875	1.20875	1.01655	0.596393	0.138031	-0.127838	-0.307748	-0.406388	-0.615642	-0.90233	-1.10725	-1.10725	-1.10725	-1.10725	-1.10725	-1.10725
chr3:58433644_58434144	1.23912	1.23912	1.23912	1.23912	1.23912	1.23912	0.82897	0.684484	0.353376	-0.402901	-0.690992	-1.05241	-0.988612	-1.42846	-0.789695	-0.789695	-0.789695	-0.789695	-0.789695	-0.789695
chr5:40798049_40798549	1.03603	1.03603	1.03603	1.03603	1.03603	1.03603	1.00108	0.509689	0.532693	0.203309	0.217949	-0.0405709	-0.110246	-0.552905	-1.32953	-1.32953	-1.32953	-1.32953	-1.32953	-1.32953
chr5:923391_923891	1.15264	1.15264	1.15264	1.15264	1.15264	1.15264	1.12243	0.622064	0.297042	0.188495	-0.371223	-0.563296	-0.563296	-0.759676	-1.14807	-1.14807	-1.14807	-1.14807	-1.14807	-1.14807
chr1:32817246_32817746	1.28338	1.28338	1.28338	1.28338	1.28338	1.28338	0.475895	0.68094	0.108039	-0.288481	-0.255564	-0.707766	-0.617487	-0.607919	-1.08132	-1.08132	-1.08132	-1.08132	-1.08132	-1.08132
chr22:43234240_43234740	1.22873	1.22873	1.22873	1.22873	1.22873	1.22873	0.402748	0.546194	0.375963	0.0463006	-0.109678	-0.138603	-0.595521	-0.952672	-1.15786	-1.15786	-1.15786	-1.15786	-1.15786	-1.15786
chr2:27134476_27134976	1.20523	1.20523	1.20523	1.20523	1.20523	1.20523	1.02777	0.674744	0.206285	-0.257349	-0.581347	-0.193183	-1.24186	-1.07878	-0.964611	-0.964611	-0.964611	-0.964611	-0.964611	-0.964611
chr3:186108367_186108867	1.17302	1.17302	1.17302	1.17302	1.17302	1.17302	0.882196	0.492538	0.160098	0.515145	-0.271836	-0.271836	-0.741013	-0.938346	-1.14418	-1.14418	-1.14418	-1.14418	-1.14418	-1.14418
chr1:40636877_40637377	1.2316	1.2316	1.2316	1.2316	1.2316	1.2316	0.620202	0.350732	0.350732	0.257001	-0.137367	-0.330401	-0.89423	-0.995697	-1.10176	-1.10176	-1.10176	-1.10176	-1.10176	-1.10176
chr5:146182554_146183054	1.36587	1.36587	1.36587	1.36587	1.36587	1.36587	0.764334	-0.232426	0.0862819	-0.617605	-0.774275	-0.791298	-0.861341	-0.602129	-0.861124	-0.861124	-0.861124	-0.861124	-0.861124	-0.861124
chr18:21600736_21601236	1.22631	1.22631	1.22631	1.22631	1.22631	1.22631	0.514261	0.0541515	0.376105	0.193312	0.036586	-0.127866	-0.336814	-0.857253	-1.20172	-1.20172	-1.20172	-1.20172	-1.20172	-1.20172
chr12:57087683_57088183	1.22125	1.22125	1.22125	1.22125	1.22125	1.22125	1.22125	0.566499	-0.0096015	-0.277145	-0.485602	-0.852736	-1.33473	-0.815309	-0.89002	-0.89002	-0.89002	-0.89002	-0.89002	-0.89002
chr5:87412688_87413188	1.36319	1.36319	1.36319	1.36319	1.36319	1.36319	0.857646	-0.131419	-0.719737	-0.906171	-0.84372	-0.630433	-1.25437	-0.96667	-0.597375	-0.597375	-0.597375	-0.597375	-0.597375	-0.597375
chr10:79347134_79347634	1.38109	1.38109	1.38109	1.38109	1.38109	1.38109	0.778976	-0.200301	-0.309438	-0.790712	-0.551031	-0.558268	-0.93904	-0.679578	-0.839521	-0.839521	-0.839521	-0.839521	-0.839521	-0.839521
chr10:104337921_104338421	1.40823	1.40823	1.40823	1.40823	1.40823	1.40823	0.229555	0.140086	-0.544154	-0.487792	-0.696363	-0.482996	-0.299243	-0.942021	-0.894409	-0.894409	-0.894409	-0.894409	-0.894409	-0.894409
chr1:202184638_202185138	1.05038	1.05038	1.05038	1.05038	1.05038	1.05038	1.05038	1.05038	0.723255	0.223393	-0.216866	-0.67231	-0.799327	-0.836404	-1.13747	-1.13747	-1.13747	-1.13747	-1.13747	-1.13747
chr14:31026267_31026767	1.33884	1.33884	1.33884	1.33884	1.33884	1.33884	0.753281	0.235425	-0.0917887	-0.374748	-0.679081	-0.661977	-0.750989	-0.732637	-0.95509	-0.95509	-0.95509	-0.95509	-0.95509	-0.95509
chr11:57499494_57499994	1.19143	1.19143	1.19143	1.19143	1.19143	1.19143	0.261582	0.404039	0.668427	0.407571	0.102942	-0.499166	-1.36021	-1.48961	-0.940695	-0.940695	-0.940695	-0.940695	-0.940695	-0.940695
chr22:17116891_17117391	1.10732	1.10732	1.10732	1.10732	1.10732	1.10732	1.05036	0.75859	0.649262	0.097718	-0.172008	-0.567366	-0.613277	-1.20728	-1.10665	-1.10665	-1.10665	-1.10665	-1.10665	-1.10665
chr11:83285522_83286022	1.24503	1.24503	1.24503	1.24503	1.24503	1.24503	0.846274	0.235476	0.290954	-0.0116778	-0.255196	-0.245714	-0.871061	-0.972857	-1.08107	-1.08107	-1.08107	-1.08107	-1.08107	-1.08107
chr15:34337785_34338285	1.27617	1.27617	1.27617	1.27617	1.27617	1.27617	0.650797	0.433479	0.428616	-0.01929	-0.898867	-1.08927	-0.843121	-1.04186	-0.879584	-0.879584	-0.879584	-0.879584	-0.879584	-0.879584
chr7:64794109_64794609	1.24295	1.24295	1.24295	1.24295	1.24295	1.24295	0.740128	0.178534	0.00701897	-0.393487	0.120098	0.163651	-0.462629	-0.970328	-1.14011	-1.14011	-1.14011	-1.14011	-1.14011	-1.14011
chr1:20711890_20712390	1.14208	1.14208	1.14208	1.14208	1.14208	1.14208	1.00101	0.496433	0.624146	0.363111	-0.427367	-0.46884	-0.771032	-1.04517	-1.10413	-1.10413	-1.10413	-1.10413	-1.10413	-1.10413
chr14:52950868_52951368	1.13312	1.13312	1.13312	1.13312	1.13312	1.13312	0.81196	0.539959	1.00809	-0.0999503	-0.0284576	-0.574374	-0.933137	-1.24309	-1.04662	-1.04662	-1.04662	-1.04662	-1.04662	-1.04662
chr4:151099343_151099843	1.1835	1.1835	1.1835	1.1835	1.1835	1.1835	0.989582	0.923841	0.374548	-0.332782	-0.43115	-1.03508	-0.788884	-0.826035	-0.995842	-0.995842	-0.995842	-0.995842	-0.995842	-0.995842
chr3:122514160_122514660	1.33859	1.33859	1.33859	1.33859	1.33859	1.33859	0.407707	0.111376	-0.0953304	0.0871815	-0.185314	-0.484063	-0.967512	-0.809222	-1.01606	-1.01606	-1.01606	-1.01606	-1.01606	-1.01606
chr12:118376249_118376749	1.35131	1.35131	1.35131	1.35131	1.35131	1.35131	0.636783	0.366216	-0.105291	-0.687814	-0.992857	-0.758973	-0.574718	-0.855889	-0.855889	-0.855889	-0.855889	-0.855889	-0.855889	-0.855889
chr11:108467259_108467759	1.33387	1.33387	1.33387	1.33387	1.33387	1.33387	1.02544	-0.116394	-0.587946	-1.00941	-1.30605	-0.855101	-0.901069	-0.839018	-0.568947	-0.568947	-0.568947	-0.568947	-0.568947	-0.568947
chr9:34523046_34523546	1.25546	1.25546	1.25546	1.25546	1.25546	1.25546	0.675629	0.066458	-1.03654	-1.08019	-1.49725	-1.34449	-1.24345	-1.0318	-0.173515	-0.173515	-0.173515	-0.173515	-0.173515	-0.173515
chr12:56645885_56646385	1.36479	1.36479	1.36479	1.36479	1.36479	1.36479	0.575176	0.150828	-0.391555	-0.921864	-0.850297	-1.10685	-1.25267	-1.03631	-0.559196	-0.559196	-0.559196	-0.559196	-0.559196	-0.559196
chr11:31030362_31030862	1.18028	1.18028	1.18028	1.18028	1.18028	1.18028	0.908268	0.637508	0.297841	0.029231	0.029231	-0.498189	-0.887492	-0.907982	-1.11502	-1.11502	-1.11502	-1.11502	-1.11502	-1.11502
chr21:36866860_36867360	1.17015	1.17015	1.17015	1.17015	1.17015	1.17015	0.87754	0.372121	0.372121	0.428692	-0.290826	-0.290826	-0.500712	-1.02349	-1.16092	-1.16092	-1.16092	-1.16092	-1.16092	-1.16092
chr3:13479842_13480342	1.33222	1.33222	1.33222	1.33222	1.33222	1.33222	0.110224	-0.14934	-0.699528	0.0481932	0.29014	-0.277262	-0.0786444	-0.646076	-1.09851	-1.09851	-1.09851	-1.09851	-1.09851	-1.09851
chr3:184338518_184339018	1.38775	1.38775	1.38775	1.38775	1.38775	1.38775	0.701594	-0.100711	-0.944616	-0.920562	-0.986996	-0.913002	-0.881151	-0.592161	-0.614815	-0.614815	-0.614815	-0.614815	-0.614815	-0.614815
chr1:32222119_32222619	1.13748	1.13748	1.13748	1.13748	1.13748	1.13748	0.844737	0.844737	0.377246	0.108435	-0.251103	-0.445206	-0.572737	-0.431675	-1.21655	-1.21655	-1.21655	-1.21655	-1.21655	-1.21655
chr2:190343822_190344322	1.31366	1.31366	1.31366	1.31366	1.31366	1.31366	0.805707	0.193385	-0.135137	-0.322459	-0.322459	-0.553053	-0.45835	-0.835169	-1.0424	-1.0424	-1.0424	-1.0424	-1.0424	-1.0424
chr1:240091631_240092131	1.17943	1.17943	1.17943	1.17943	1.17943	1.17943	1.14884	0.489653	0.154348	-0.196349	-0.406216	-0.21389	-0.51425	-0.464494	-1.17904	-1.17904	-1.17904	-1.17904	-1.17904	-1.17904
chr7:97872303_97872803	1.30686	1.30686	1.30686	1.30686	1.30686	1.30686	0.805331	0.41227	0.0831152	-0.419842	-0.780145	-1.09262	-0.587599	-0.935596	-0.887682	-0.887682	-0.887682	-0.887682	-0.887682	-0.887682
chr7:7640315_7640815	1.28879	1.28879	1.28879	1.28879	1.28879	1.28879	0.883457	0.271761	-0.298038	-1.24409	-1.38022	-0.919597	-1.28517	-0.858498	-0.48372	-0.48372	-0.48372	-0.48372	-0.48372	-0.48372
chr13:100674124_100674624	1.18235	1.18235	1.18235	1.18235	1.18235	1.18235	1.09115	0.665052	0.324097	-0.386312	-0.247952	-0.730233	-1.5	-1.21587	-0.839605	-0.839605	-0.839605	-0.839605	-0.839605	-0.839605
chr5:39074227_39074727	1.26698	1.26698	1.26698	1.26698	1.26698	1.26698	0.863529	0.24919	0.0766948	-0.302259	-0.163836	-0.309679	-0.526968	-0.859066	-1.10492	-1.10492	-1.10492	-1.10492	-1.10492	-1.10492
chr8:123072417_123072917	1.32784	1.32784	1.32784	1.32784	1.32784	1.32784	0.299839	0.633824	-0.425273	-0.535474	-0.293638	-0.305565	-0.523097	-0.411866	-1.06763	-1.06763	-1.06763	-1.06763	-1.06763	-1.06763
chr2:171160643_171161143	1.30675	1.30675	1.30675	1.30675	1.30675	1.30675	1.205	0.205328	-0.685584	-0.910993	-0.669541	-0.68676	-0.764468	-0.525525	-0.834654	-0.834654	-0.834654	-0.834654	-0.834654	-0.834654
chr5:74640359_74640859	1.2258	1.2258	1.2258	1.2258	1.2258	1.2258	0.535386	0.388468	-0.183196	0.183819	-0.144766	0.124512	-0.177081	-0.89144	-1.19841	-1.19841	-1.19841	-1.19841	-1.19841	-1.19841
chr5:146446815_146447315	1.30188	1.30188	1.30188	1.30188	1.30188	1.30188	0.998735	0.246054	-0.464774	-0.172688	-0.418295	-0.595034	-0.58644	-1.07338	-0.957576	-0.957576	-0.957576	-0.957576	-0.957576	-0.957576
chr9:129890146_129890646	1.24122	1.24122	1.24122	1.24122	1.24122	1.24122	0.967232	0.249951	0.139627	-0.0452654	-0.0452654	-0.57651	-0.685341	-1.06453	-1.06453	-1.06453	-1.06453	-1.06453	-1.06453	-1.06453
chr2:169285492_169285992	1.26553	1.26553	1.26553	1.26553	1.26553	1.26553	0.991441	0.48231	-0.126907	-0.126907	-0.337792	-1.01598	-0.873503	-0.762022	-0.970636	-0.970636	-0.970636	-0.970636	-0.970636	-0.970636
chr11:95789373_95789873	1.29138	1.29138	1.29138	1.29138	1.29138	1.29138	0.586436	-0.173654	-0.0785606	0.0115437	-0.238106	-0.200705	-0.358067	-0.22399	-1.17886	-1.17886	-1.17886	-1.17886	-1.17886	-1.17886
chr4:5996593_5997093	1.00485	1.00485	1.00485	1.00485	1.00485	1.00485	0.709977	0.568248	0.835317	0.646666	0.24722	0.191036	-0.678743	-1.22126	-1.22126	-1.22126	-1.22126	-1.22126	-1.22126	-1.22126
chr12:118372185_118372685	1.00742	1.00742	1.00742	1.00742	1.00742	1.00742	1.00742	1.00742	0.834274	0.328721	-0.0707274	-0.524156	-0.447203	-0.989727	-1.19843	-1.19843	-1.19843	-1.19843	-1.19843	-1.19843
chr5:129905512_129906012	1.28219	1.28219	1.28219	1.28219	1.28219	1.28219	1.22466	0.151546	-0.324122	-0.384003	-0.384003	-0.530407	-0.930851	-0.930851	-0.930851	-0.930851	-0.930851	-0.930851	-0.930851	-0.930851
chr15:66095902_66096402	1.06118	1.06118	1.06118	1.06118	1.06118	1.06118	0.880954	0.758887	0.814913	0.410486	0.00203746	-0.604711	-0.527739	-0.978482	-1.18724	-1.18724	-1.18724	-1.18724	-1.18724	-1.18724
chr5:81883387_81883887	1.20491	1.20491	1.20491	1.20491	1.20491	1.20491	0.909932	0.73101	0.158486	-0.00188054	-0.247823	-0.657946	-0.683601	-0.883573	-1.09235	-1.09235	-1.09235	-1.09235	-1.09235	-1.09235
chr3:125595312_125595812	1.22659	1.22659	1.22659	1.22659	1.22659	1.22659	0.718335	0.359441	0.248889	0.198206	-0.412439	-0.0961635	-0.938041	-1.5	-0.983228	-0.983228	-0.983228	-0.983228	-0.983228	-0.983228
chr5:40797473_40797973	1.36051	1.36051	1.36051	1.36051	1.36051	1.36051	0.638708	0.0709752	0.0709752	-0.435278	-0.7647	-0.755114	-0.97353	-0.97353	-0.840256	-0.840256	-0.840256	-0.840256	-0.840256	-0.840256
chr12:96034867_96035367	1.26689	1.26689	1.26689	1.26689	1.26689	1.26689	1.12421	0.21817	-0.113301	0.012094	-0.475467	-0.858569	-0.763016	-0.963635	-0.963635	-0.963635	-0.963635	-0.963635	-0.963635	-0.963635
chr1:184386699_184387199	1.26657	1.26657	1.26657	1.26657	1.26657	1.26657	1.11413	0.394874	-0.62388	-0.648812	-0.488805	-0.487896	-0.46804	-0.174354	-1.0361	-1.0361	-1.0361	-1.0361	-1.0361	-1.0361
chr15:67358727_67359227	1.09378	1.09378	1.09378	1.09378	1.09378	1.09378	1.03609	0.417728	0.417728	0.417728	0.017182	-0.178876	-0.390974	-0.771512	-1.25463	-1.25463	-1.25463	-1.25463	-1.25463	-1.25463
chr1:43573083_43573583	1.24322	1.24322	1.24322	1.24322	1.24322	1.24322	1.08021	0.46405	-0.00819424	-0.361743	-0.119321	-0.599743	-0.902547	-1.02378	-0.998047	-0.998047	-0.998047	-0.998047	-0.998047	-0.998047
chr8:22734078_22734578	1.06699	1.06699	1.06699	1.06699	1.06699	1.06699	1.06699	0.793193	0.461297	0.461297	0.0605926	-0.394263	-0.967151	-1.16768	-1.11937	-1.11937	-1.11937	-1.11937	-1.11937	-1.11937
chr10:92290823_92291323	1.39283	1.39283	1.39283	1.39283	1.39283	1.39283	0.573407	-0.33383	-0.806234	-0.684067	-0.442505	-0.792393	-0.210852	-0.255803	-0.90078	-0.90078	-0.90078	-0.90078	-0.90078	-0.90078
chr18:75784355_75784855	1.14533	1.14533	1.14533	1.14533	1.14533	1.14533	0.849415	0.743901	0.275446	-0.303943	-0.274017	0.0630546	-0.153556	-0.667892	-1.23406	-1.23406	-1.23406	-1.23406	-1.23406	-1.23406
chr10:59175549_59176049	1.3822	1.3822	1.3822	1.3822	1.3822	1.3822	0.470765	-0.0405724	0.0985391	-0.40899	-0.980978	-0.909661	-0.909661	-0.930397	-0.780377	-0.780377	-0.780377	-0.780377	-0.780377	-0.780377
chr22:17773801_17774301	1.25219	1.25219	1.25219	1.25219	1.25219	1.25219	0.73854	1.00568	-0.0605962	-0.56822	-0.685754	-1.2196	-1.01964	-1.04925	-0.775718	-0.775718	-0.775718	-0.775718	-0.775718	-0.775718
chr6:111483214_111483714	1.26126	1.26126	1.26126	1.26126	1.26126	1.26126	1.11816	0.789873	-0.718848	-0.615968	-0.863004	-0.839237	-0.589536	-0.867596	-0.83023	-0.83023	-0.83023	-0.83023	-0.83023	-0.83023
chr3:9946350_9946850	1.42479	1.42479	1.42479	1.42479	1.42479	1.42479	0.187072	-0.324854	-0.663634	-0.758003	-1.06728	-1.13218	-1.07143	-0.852145	-0.477718	-0.477718	-0.477718	-0.477718	-0.477718	-0.477718
chr2:135530624_135531124	1.30309	1.30309	1.30309	1.30309	1.30309	1.30309	1.01595	-0.143644	-0.743021	-1.12601	-1.26367	-1.25577	-0.929971	-0.967726	-0.400784	-0.400784	-0.400784	-0.400784	-0.400784	-0.400784
chr19:40778463_40778963	1.25929	1.25929	1.25929	1.25929	1.25929	1.25929	1.00504	0.281872	0.170643	-0.0584228	-0.436386	-1.17666	-1.12322	-0.847245	-0.895227	-0.895227	-0.895227	-0.895227	-0.895227	-0.895227
chr5:177607379_177607879	1.24235	1.24235	1.24235	1.24235	1.24235	1.24235	0.94516	0.431825	0.221619	-0.429818	-0.296618	-0.296618	-0.595507	-1.06202	-1.06202	-1.06202	-1.06202	-1.06202	-1.06202	-1.06202
chr6:158644054_158644554	1.27148	1.27148	1.27148	1.27148	1.27148	1.27148	0.995124	0.596928	-0.0173367	-0.59924	-0.59924	-0.628892	-0.939808	-0.739196	-0.94954	-0.94954	-0.94954	-0.94954	-0.94954	-0.94954
chr11:32073082_32073582	1.13128	1.13128	1.13128	1.13128	1.13128	1.13128	0.94962	0.67444	0.340871	-0.0145673	0.0154984	-0.181626	-0.585336	-0.585336	-1.23354	-1.23354	-1.23354	-1.23354	-1.23354	-1.23354
chr2:2848580_2849080	1.31362	1.31362	1.31362	1.31362	1.31362	1.31362	0.688843	0.218935	-0.114862	-0.238382	-0.0921042	-0.575424	-0.595524	-1.11262	-1.0101	-1.0101	-1.0101	-1.0101	-1.0101	-1.0101
chr17:31901574_31902074	1.31714	1.31714	1.31714	1.31714	1.31714	1.31714	0.702461	0.427039	-0.430812	-0.755613	-0.0678943	-0.684812	-0.410379	-0.61273	-1.01168	-1.01168	-1.01168	-1.01168	-1.01168	-1.01168
chr1:37595784_37596284	1.32801	1.32801	1.32801	1.32801	1.32801	1.32801	0.737332	0.490701	-0.478107	-0.479566	-0.56358	-0.51147	-0.548365	-0.750272	-0.977454	-0.977454	-0.977454	-0.977454	-0.977454	-0.977454
chr17:32519225_32519725	1.2781	1.2781	1.2781	1.2781	1.2781	1.2781	0.671687	0.671687	0.0825332	-0.191073	-0.502011	-1.17632	-0.818556	-0.647174	-0.9599	-0.9599	-0.9599	-0.9599	-0.9599	-0.9599
chr4:169791556_169792056	1.26643	1.26643	1.26643	1.26643	1.26643	1.26643	0.968366	0.497579	-0.361713	-0.331164	-0.331164	-0.259359	-0.642104	-0.756048	-1.06382	-1.06382	-1.06382	-1.06382	-1.06382	-1.06382
chr17:81720826_81721326	1.14545	1.14545	1.14545	1.14545	1.14545	1.14545	1.14545	0.746012	0.411516	-0.172206	-0.357452	-0.555125	-0.555125	-0.65903	-1.14613	-1.14613	-1.14613	-1.14613	-1.14613	-1.14613
chr13:61413704_61414204	1.27225	1.27225	1.27225	1.27225	1.27225	1.27225	0.973876	0.349895	0.0151183	-0.0648288	-0.478016	-0.795833	-0.795833	-0.795833	-1.00701	-1.00701	-1.00701	-1.00701	-1.00701	-1.00701
chr7:151057729_151058229	1.34575	1.34575	1.34575	1.34575	1.34575	1.34575	0.928455	-0.236967	-0.578044	-0.177843	-0.794963	-1.25027	-1.08724	-0.94834	-0.65488	-0.65488	-0.65488	-0.65488	-0.65488	-0.65488
chr5:157265837_157266337	1.09691	1.09691	1.09691	1.09691	1.09691	1.09691	0.957889	0.485613	0.150134	0.105497	0.715791	-0.284427	-0.590592	-0.716777	-1.23409	-1.23409	-1.23409	-1.23409	-1.23409	-1.23409
chr8:71858190_71858690	1.16419	1.16419	1.16419	1.16419	1.16419	1.16419	0.886134	0.260806	0.260806	0.260806	0.260806	-0.278328	-0.492814	-1.04296	-1.1834	-1.1834	-1.1834	-1.1834	-1.1834	-1.1834
chr1:163565158_163565658	1.19035	1.19035	1.19035	1.19035	1.19035	1.19035	0.991858	0.885234	0.267193	-0.00738747	-0.955743	-0.998198	-0.774098	-1.06574	-0.914205	-0.914205	-0.914205	-0.914205	-0.914205	-0.914205
chr7:33062590_33063090	1.07312	1.07312	1.07312	1.07312	1.07312	1.07312	0.750495	0.406325	0.157182	-0.252251	0.366308	0.517281	0.107423	-0.520328	-1.32852	-1.32852	-1.32852	-1.32852	-1.32852	-1.32852
chr2:231708548_231709048	1.3403	1.3403	1.3403	1.3403	1.3403	1.3403	0.825158	0.352486	-0.266026	-0.779076	-0.652739	-0.801306	-0.931674	-0.942715	-0.807652	-0.807652	-0.807652	-0.807652	-0.807652	-0.807652
chr1:179026112_179026612	1.15956	1.15956	1.15956	1.15956	1.15956	1.15956	1.10118	0.824188	0.350444	-0.0598791	-0.309385	-0.716844	-0.937099	-1.04671	-1.02721	-1.02721	-1.02721	-1.02721	-1.02721	-1.02721
chr20:63537906_63538406	1.23449	1.23449	1.23449	1.23449	1.23449	1.23449	0.719133	0.496382	0.466166	0.0995551	-0.53713	-0.519572	-0.926105	-0.862561	-1.05714	-1.05714	-1.05714	-1.05714	-1.05714	-1.05714
chr2:74935949_74936449	1.12654	1.12654	1.12654	1.12654	1.12654	1.12654	0.981808	0.617518	0.552694	0.284892	-0.121072	-0.537744	-0.648439	-0.945179	-1.15729	-1.15729	-1.15729	-1.15729	-1.15729	-1.15729
chr7:149714474_149714974	1.24061	1.24061	1.24061	1.24061	1.24061	1.24061	0.821476	0.236505	0.0265955	-0.173583	0.143023	-0.127205	-0.745699	-0.788038	-1.13945	-1.13945	-1.13945	-1.13945	-1.13945	-1.13945
chr17:76375460_76375960	1.05235	1.05235	1.05235	1.05235	1.05235	1.05235	1.03941	0.97192	0.48819	-0.0259594	-0.225733	-0.0892707	-0.18634	-0.781509	-1.2508	-1.2508	-1.2508	-1.2508	-1.2508	-1.2508
chr5:133467326_133467826	1.06409	1.06409	1.06409	1.06409	1.06409	1.06409	0.764143	0.696645	0.348362	0.43067	0.311606	-0.0773486	-0.295586	-0.847424	-1.28593	-1.28593	-1.28593	-1.28593	-1.28593	-1.28593
chr6:119078582_119079082	1.25022	1.25022	1.25022	1.25022	1.25022	1.25022	0.971192	0.864197	-0.216407	-0.760571	-0.619179	-0.486902	-0.623012	-0.826432	-0.967366	-0.967366	-0.967366	-0.967366	-0.967366	-0.967366
chr7:100177321_100177821	1.24106	1.24106	1.24106	1.24106	1.24106	1.24106	0.895044	1.03827	-0.714811	-0.327456	-0.518144	-1.19926	-1.0821	-0.837841	-0.783343	-0.783343	-0.783343	-0.783343	-0.783343	-0.783343
chr6:85678586_85679086	1.23668	1.23668	1.23668	1.23668	1.23668	1.23668	0.715467	-0.304261	-1.19434	-1.42427	-1.27103	-1.16826	-1.24753	-1.09382	-0.0720052	-0.0720052	-0.0720052	-0.0720052	-0.0720052	-0.0720052
chr13:97975714_97976214	1.0782	1.0782	1.0782	1.0782	1.0782	1.0782	0.673821	0.340904	0.340904	-0.0922684	0.321267	0.395623	0.0847944	-0.468009	-1.34437	-1.34437	-1.34437	-1.34437	-1.34437	-1.34437
chr3:64533589_64534089	1.29373	1.29373	1.29373	1.29373	1.29373	1.29373	0.558792	0.0394544	0.0394544	-0.0573459	-0.0573459	-0.256702	-0.472367	-0.676192	-1.14669	-1.14669	-1.14669	-1.14669	-1.14669	-1.14669
chr19:12495173_12495673	1.26124	1.26124	1.26124	1.26124	1.26124	1.26124	0.853437	0.575104	-0.291817	-0.23368	-1.25348	-1.40277	-1.29344	-0.973353	-0.59124	-0.59124	-0.59124	-0.59124	-0.59124	-0.59124
chr8:143635726_143636226	1.12177	1.12177	1.12177	1.12177	1.12177	1.12177	0.603292	0.620659	0.282724	-0.130254	-0.317404	0.35487	0.229626	-0.683955	-1.2817	-1.2817	-1.2817	-1.2817	-1.2817	-1.2817
chr17:75904721_75905221	1.23484	1.23484	1.23484	1.23484	1.23484	1.23484	0.887838	0.303597	0.154441	0.409878	-0.362005	-0.885948	-0.887673	-0.886045	-1.02386	-1.02386	-1.02386	-1.02386	-1.02386	-1.02386
chr2:3257242_3257742	1.03795	1.03795	1.03795	1.03795	1.03795	1.03795	0.757739	0.478818	0.574796	0.574796	0.359199	0.0520874	-0.434052	-0.805286	-1.29763	-1.29763	-1.29763	-1.29763	-1.29763	-1.29763
chr22:23070029_23070529	1.32342	1.32342	1.32342	1.32342	1.32342	1.32342	0.718358	0.314602	0.223777	-0.724355	-0.843977	-0.567643	-1.05379	-0.884581	-0.85382	-0.85382	-0.85382	-0.85382	-0.85382	-0.85382
chr1:218336286_218336786	1.28095	1.28095	1.28095	1.28095	1.28095	1.28095	0.647958	0.523219	-0.0997567	-0.488575	-0.434136	-0.159694	-0.568989	-0.385769	-1.11999	-1.11999	-1.11999	-1.11999	-1.11999	-1.11999
chr22:38570053_38570553	1.45607	1.45607	1.45607	1.45607	1.45607	1.45607	0.0515332	-0.961579	-0.34335	-0.774098	-0.620299	-0.729278	-0.720482	-0.335467	-0.717232	-0.717232	-0.717232	-0.717232	-0.717232	-0.717232
chr14:100192795_100193295	1.22468	1.22468	1.22468	1.22468	1.22468	1.22468	0.552103	0.582446	-0.0268693	0.27239	0.0473823	-0.437131	-0.509729	-0.867745	-1.16016	-1.16016	-1.16016	-1.16016	-1.16016	-1.16016
chr11:68763848_68764348	1.17061	1.17061	1.17061	1.17061	1.17061	1.17061	1.13911	0.734478	0.247348	-0.270415	-0.227193	-0.465033	-0.683295	-0.888027	-1.10177	-1.10177	-1.10177	-1.10177	-1.10177	-1.10177
chr14:58152000_58152500	1.22737	1.22737	1.22737	1.22737	1.22737	1.22737	0.935163	0.810133	0.21277	-0.378763	-1.12167	-0.846584	-1.25683	-0.933792	-0.797437	-0.797437	-0.797437	-0.797437	-0.797437	-0.797437
chr1:147172267_147172767	1.43346	1.43346	1.43346	1.43346	1.43346	1.43346	0.329361	-0.30278	-0.516585	-0.749673	-0.501875	-0.589584	-0.479686	-0.684956	-0.850827	-0.850827	-0.850827	-0.850827	-0.850827	-0.850827
chr11:57324748_57325248	1.24618	1.24618	1.24618	1.24618	1.24618	1.24618	1.16956	0.510292	-0.260953	-0.872757	-0.704853	-1.33006	-1.37762	-0.516422	-0.682374	-0.682374	-0.682374	-0.682374	-0.682374	-0.682374
chr19:58040537_58041037	1.05707	1.05707	1.05707	1.05707	1.05707	1.05707	1.05707	1.05707	0.43188	0.334495	-0.249955	-0.355685	-0.572655	-1.12916	-1.15257	-1.15257	-1.15257	-1.15257	-1.15257	-1.15257
chr6:31972002_31972502	1.20551	1.20551	1.20551	1.20551	1.20551	1.20551	0.886274	0.661142	0.409167	-0.259497	-0.291646	-0.777392	-0.498329	-0.704093	-1.10978	-1.10978	-1.10978	-1.10978	-1.10978	-1.10978
chr3:184261436_184261936	1.16759	1.16759	1.16759	1.16759	1.16759	1.16759	1.02996	0.481852	-0.0871765	0.114034	0.19646	-0.0926899	-0.794576	-1.00008	-1.14222	-1.14222	-1.14222	-1.14222	-1.14222	-1.14222
chr7:107743468_107743968	1.20464	1.20464	1.20464	1.20464	1.20464	1.20464	0.588463	0.624218	0.383115	0.0123628	-0.325396	-0.45243	-0.342357	-0.462485	-1.20889	-1.20889	-1.20889	-1.20889	-1.20889	-1.20889
chr4:6715927_6716427	1.09878	1.09878	1.09878	1.09878	1.09878	1.09878	0.584282	0.45896	0.842285	0.377904	0.161249	-0.0286663	-0.696811	-1.06264	-1.20487	-1.20487	-1.20487	-1.20487	-1.20487	-1.20487
chr13:45615400_45615900	1.38052	1.38052	1.38052	1.38052	1.38052	1.38052	0.581541	-0.15583	-0.353342	-1.01729	-0.962584	-1.17004	-0.288278	-0.278276	-0.773166	-0.773166	-0.773166	-0.773166	-0.773166	-0.773166
chr11:8910850_8911350	1.25208	1.25208	1.25208	1.25208	1.25208	1.25208	1.06698	0.698762	-0.094457	-0.456619	-0.682456	-0.681524	-0.906602	-1.1126	-0.890659	-0.890659	-0.890659	-0.890659	-0.890659	-0.890659
chr1:145957792_145958292	1.37966	1.37966	1.37966	1.37966	1.37966	1.37966	0.336567	-0.186976	0.0478764	-0.616514	-0.367274	-0.49445	-0.289758	-0.589873	-1.01959	-1.01959	-1.01959	-1.01959	-1.01959	-1.01959
chr11:8243296_8243796	1.27864	1.27864	1.27864	1.27864	1.27864	1.27864	0.553773	0.0155256	0.188433	0.247036	0.0586883	-0.567953	-0.700004	-1.00014	-1.07787	-1.07787	-1.07787	-1.07787	-1.07787	-1.07787
chr17:1516561_1517061	1.26663	1.26663	1.26663	1.26663	1.26663	1.26663	0.9223	0.249776	0.136273	0.134789	-0.832139	-0.537495	-0.764525	-0.803074	-1.01762	-1.01762	-1.01762	-1.01762	-1.01762	-1.01762
chr7:127651772_127652272	1.37266	1.37266	1.37266	1.37266	1.37266	1.37266	0.544818	-0.121326	-0.335797	-0.691379	-0.133866	-0.323619	-1.07708	-1.28299	-0.802459	-0.802459	-0.802459	-0.802459	-0.802459	-0.802459
chr3:147392076_147392576	1.38081	1.38081	1.38081	1.38081	1.38081	1.38081	0.639144	0.139581	-0.678285	-0.872399	-0.376387	-0.615484	-0.920636	-0.568741	-0.838606	-0.838606	-0.838606	-0.838606	-0.838606	-0.838606
chr4:82429210_82429710	1.23503	1.23503	1.23503	1.23503	1.23503	1.23503	1.03357	0.708542	-0.0468023	-0.831374	-1.23641	-1.28918	-0.956772	-1.0968	-0.615826	-0.615826	-0.615826	-0.615826	-0.615826	-0.615826
chr5:36151745_36152245	1.28502	1.28502	1.28502	1.28502	1.28502	1.28502	0.501257	0.3344	-0.0181246	-0.289416	-0.215115	0.0152278	-0.340458	-0.977475	-1.12007	-1.12007	-1.12007	-1.12007	-1.12007	-1.12007
chr3:127716338_127716838	1.24168	1.24168	1.24168	1.24168	1.24168	1.24168	0.249272	0.822247	0.464924	0.119656	-0.548753	-0.993571	-0.437525	-0.81953	-1.05113	-1.05113	-1.05113	-1.05113	-1.05113	-1.05113
chr3:45538353_45538853	1.12892	1.12892	1.12892	1.12892	1.12892	1.12892	0.961288	0.436013	0.436013	0.436013	-0.151567	-0.209509	-0.712579	-0.712579	-1.20944	-1.20944	-1.20944	-1.20944	-1.20944	-1.20944
chr10:133185918_133186418	1.05927	1.05927	1.05927	1.05927	1.05927	1.05927	0.857361	1.01302	0.384336	0.634017	-0.189091	-0.483831	-0.450733	-0.928212	-1.19875	-1.19875	-1.19875	-1.19875	-1.19875	-1.19875
chr10:1745940_1746440	1.2064	1.2064	1.2064	1.2064	1.2064	1.2064	0.902108	0.620455	-0.00847516	-0.199422	-0.234452	-0.30108	-0.427614	-0.448928	-1.19017	-1.19017	-1.19017	-1.19017	-1.19017	-1.19017
chr1:31789143_31789643	1.34092	1.34092	1.34092	1.34092	1.34092	1.34092	0.813023	0.0722334	-0.413717	-0.745876	-1.41677	-1.12099	-0.952736	-0.76776	-0.585493	-0.585493	-0.585493	-0.585493	-0.585493	-0.585493
chr3:160565474_160565974	1.40581	1.40581	1.40581	1.40581	1.40581	1.40581	0.66092	-0.525878	-0.905762	-0.729964	-0.815925	-0.324037	-0.417048	-0.785191	-0.76533	-0.76533	-0.76533	-0.76533	-0.76533	-0.76533
chr16:68512076_68512576	1.16222	1.16222	1.16222	1.16222	1.16222	1.16222	1.01505	0.644612	0.290754	0.131745	-0.290262	-0.182128	-0.958585	-1.16518	-1.07655	-1.07655	-1.07655	-1.07655	-1.07655	-1.07655
chr15:65133605_65134105	1.1615	1.1615	1.1615	1.1615	1.1615	1.1615	0.751341	0.566485	0.500564	0.418906	-0.156924	-0.562406	-0.610328	-1.00254	-1.14568	-1.14568	-1.14568	-1.14568	-1.14568	-1.14568
chr5:77030132_77030632	1.31921	1.31921	1.31921	1.31921	1.31921	1.31921	0.790078	0.0475678	0.144714	-0.0904796	-0.711729	-0.63825	-0.750908	-0.958032	-0.958032	-0.958032	-0.958032	-0.958032	-0.958032	-0.958032
chr3:45388214_45388714	1.33741	1.33741	1.33741	1.33741	1.33741	1.33741	0.696019	0.0573172	-0.00874528	-0.204138	-0.368459	-0.76681	-0.619178	-0.905799	-0.984114	-0.984114	-0.984114	-0.984114	-0.984114	-0.984114
chr1:58783257_58783757	1.16571	1.16571	1.16571	1.16571	1.16571	1.16571	1.13384	0.390117	0.0473385	0.521372	-0.305337	-0.496937	-0.989798	-1.46937	-0.970911	-0.970911	-0.970911	-0.970911	-0.970911	-0.970911
chr7:151013603_151014103	1.2122	1.2122	1.2122	1.2122	1.2122	1.2122	0.801002	-0.169993	0.456422	0.264694	-0.0648663	-0.0960662	-0.732086	-0.753487	-1.16314	-1.16314	-1.16314	-1.16314	-1.16314	-1.16314
chr16:11668103_11668603	1.29566	1.29566	1.29566	1.29566	1.29566	1.29566	0.786523	0.593933	-0.478738	-0.812312	-1.07112	-1.19828	-0.878155	-1.35136	-0.560745	-0.560745	-0.560745	-0.560745	-0.560745	-0.560745
chr3:14947303_14947803	1.20971	1.20971	1.20971	1.20971	1.20971	1.20971	0.957574	0.320624	0.206161	0.014334	-0.189305	-0.462134	-0.314366	-0.769967	-1.17019	-1.17019	-1.17019	-1.17019	-1.17019	-1.17019
chr19:2819537_2820037	1.09097	1.09097	1.09097	1.09097	1.09097	1.09097	0.904129	0.40067	0.918181	0.284361	0.119843	-0.328123	-0.888981	-1.17936	-1.12942	-1.12942	-1.12942	-1.12942	-1.12942	-1.12942
chr4:47914481_47914981	1.41076	1.41076	1.41076	1.41076	1.41076	1.41076	0.283044	-0.461537	-0.39464	-0.509249	-1.01402	-1.12456	-1.34845	-0.804423	-0.515119	-0.515119	-0.515119	-0.515119	-0.515119	-0.515119
chr4:83484914_83485414	1.29161	1.29161	1.29161	1.29161	1.29161	1.29161	0.976844	0.473239	-0.374576	-0.772531	-1.13064	-1.19762	-1.06364	-0.997041	-0.610615	-0.610615	-0.610615	-0.610615	-0.610615	-0.610615
chr11:12009164_12009664	1.32738	1.32738	1.32738	1.32738	1.32738	1.32738	0.623366	-0.1582	0.118836	-0.0322103	-0.407887	-0.415482	-0.563809	-1.28437	-0.974088	-0.974088	-0.974088	-0.974088	-0.974088	-0.974088
chr12:6222037_6222537	1.26372	1.26372	1.26372	1.26372	1.26372	1.26372	0.732996	0.732996	-0.0283969	-0.345389	-0.31445	-0.555385	-0.555385	-1.03562	-1.03562	-1.03562	-1.03562	-1.03562	-1.03562	-1.03562
chr7:99143234_99143734	1.1865	1.1865	1.1865	1.1865	1.1865	1.1865	0.766294	0.222997	0.500105	-0.0244492	-0.526967	-0.263387	-0.0705303	-0.278949	-1.24069	-1.24069	-1.24069	-1.24069	-1.24069	-1.24069
chr11:57657279_57657779	1.29605	1.29605	1.29605	1.29605	1.29605	1.29605	0.578339	0.370474	0.437442	-0.251821	-0.511121	-0.811838	-1.03934	-1.17794	-0.89508	-0.89508	-0.89508	-0.89508	-0.89508	-0.89508
chr7:132206483_132206983	1.05491	1.05491	1.05491	1.05491	1.05491	1.05491	0.731747	0.622528	0.766466	0.418162	0.305323	-0.0209374	-0.994437	-0.965209	-1.19885	-1.19885	-1.19885	-1.19885	-1.19885	-1.19885
chr11:18721000_18721500	1.40292	1.40292	1.40292	1.40292	1.40292	1.40292	0.55426	0.010226	-0.623012	-0.623012	-0.692546	-0.933832	-0.484458	-0.783273	-0.806984	-0.806984	-0.806984	-0.806984	-0.806984	-0.806984
chr13:60396685_60397185	1.23902	1.23902	1.23902	1.23902	1.23902	1.23902	0.715149	0.342664	0.16273	0.292795	-0.172787	-0.524135	-0.644827	-0.852918	-1.12547	-1.12547	-1.12547	-1.12547	-1.12547	-1.12547
chr10:132186600_132187100	1.25104	1.25104	1.25104	1.25104	1.25104	1.25104	0.723133	0.350361	-0.144298	0.000651656	0.254438	-0.378845	-0.87358	-0.821562	-1.10276	-1.10276	-1.10276	-1.10276	-1.10276	-1.10276
chr18:839239_839739	1.21476	1.21476	1.21476	1.21476	1.21476	1.21476	0.908066	0.568252	0.224145	0.0316931	-0.0900503	-1.12977	-1.12977	-1.11047	-0.926772	-0.926772	-0.926772	-0.926772	-0.926772	-0.926772
chr11:124673532_124674032	1.21628	1.21628	1.21628	1.21628	1.21628	1.21628	0.582717	0.242896	0.242896	0.144153	0.281615	-0.1161	-0.792801	-0.925625	-1.15957	-1.15957	-1.15957	-1.15957	-1.15957	-1.15957
chr12:50057050_50057550	1.30962	1.30962	1.30962	1.30962	1.30962	1.30962	0.559893	0.450527	-0.312818	-0.0610524	-0.251635	-0.730753	-0.582492	-0.48691	-1.07375	-1.07375	-1.07375	-1.07375	-1.07375	-1.07375
chr22:27100762_27101262	1.33536	1.33536	1.33536	1.33536	1.33536	1.33536	0.807202	0.277246	-0.308395	-0.249078	-0.664688	-1.00448	-1.06202	-0.706187	-0.85029	-0.85029	-0.85029	-0.85029	-0.85029	-0.85029
chr8:37700228_37700728	1.05689	1.05689	1.05689	1.05689	1.05689	1.05689	1.05689	0.772615	0.277227	0.162145	0.162145	-0.079726	-0.300023	-0.695272	-1.28289	-1.28289	-1.28289	-1.28289	-1.28289	-1.28289
chr10:123067897_123068397	1.34416	1.34416	1.34416	1.34416	1.34416	1.34416	0.593288	0.30896	-0.186528	-0.186528	-0.602641	-0.528638	-0.750645	-0.958889	-0.958889	-0.958889	-0.958889	-0.958889	-0.958889	-0.958889
chr10:119206617_119207117	1.20996	1.20996	1.20996	1.20996	1.20996	1.20996	0.793303	0.262624	0.287022	-0.031316	0.113452	-0.249933	-0.478211	-0.864742	-1.18199	-1.18199	-1.18199	-1.18199	-1.18199	-1.18199
chr3:123884160_123884660	1.35092	1.35092	1.35092	1.35092	1.35092	1.35092	0.499599	-0.0461386	-0.161215	-0.363055	-0.307545	-0.172063	-0.398267	-0.835961	-1.05348	-1.05348	-1.05348	-1.05348	-1.05348	-1.05348
chr19:4328177_4328677	1.19747	1.19747	1.19747	1.19747	1.19747	1.19747	0.303351	0.254005	-0.129633	0.0378822	0.436008	0.243421	-0.117128	-0.647149	-1.26093	-1.26093	-1.26093	-1.26093	-1.26093	-1.26093
chr6:128068042_128068542	1.31849	1.31849	1.31849	1.31849	1.31849	1.31849	0.784537	0.499645	-0.136515	-0.504496	-0.724708	-0.724708	-0.724708	-0.724708	-0.942548	-0.942548	-0.942548	-0.942548	-0.942548	-0.942548
chr3:101561631_101562131	1.18233	1.18233	1.18233	1.18233	1.18233	1.18233	1.12227	0.575627	0.223729	-0.144322	0.0177836	-0.617184	-1.03522	-1.15291	-1.01396	-1.01396	-1.01396	-1.01396	-1.01396	-1.01396
chr14:49868067_49868567	1.27235	1.27235	1.27235	1.27235	1.27235	1.27235	0.738132	0.231113	0.329194	-0.0930435	-0.196736	-0.549817	-0.862199	-0.908992	-1.05363	-1.05363	-1.05363	-1.05363	-1.05363	-1.05363
chr5:16037411_16037911	1.05097	1.05097	1.05097	1.05097	1.05097	1.05097	1.05097	0.518746	0.663539	0.663539	0.0681899	-0.565647	-0.592445	-0.972034	-1.19011	-1.19011	-1.19011	-1.19011	-1.19011	-1.19011
chr18:23452957_23453457	1.1809	1.1809	1.1809	1.1809	1.1809	1.1809	0.872726	0.643434	0.667907	-0.200414	-0.415443	-1.15874	-1.04669	-0.320961	-1.0212	-1.0212	-1.0212	-1.0212	-1.0212	-1.0212
chr22:31211946_31212446	1.30964	1.30964	1.30964	1.30964	1.30964	1.30964	0.782712	0.250323	-0.246838	-0.276861	-0.328627	-0.31055	-0.537404	-1.14646	-1.00735	-1.00735	-1.00735	-1.00735	-1.00735	-1.00735
chr16:70380578_70381078	1.18019	1.18019	1.18019	1.18019	1.18019	1.18019	0.975435	0.562161	0.381042	-0.0694843	-0.290168	-0.290168	-0.51142	-0.995612	-1.14049	-1.14049	-1.14049	-1.14049	-1.14049	-1.14049
chr12:57693692_57694192	1.10674	1.10674	1.10674	1.10674	1.10674	1.10674	0.676927	0.2043	0.38029	0.23429	0.147262	0.0537627	0.156697	-0.499051	-1.33249	-1.33249	-1.33249	-1.33249	-1.33249	-1.33249
chr1:243255634_243256134	1.28215	1.28215	1.28215	1.28215	1.28215	1.28215	0.633916	-0.268194	-0.383772	0.247481	-0.0657348	-0.272584	-0.0784279	-0.547149	-1.15974	-1.15974	-1.15974	-1.15974	-1.15974	-1.15974
chr20:3744991_3745491	1.28788	1.28788	1.28788	1.28788	1.28788	1.28788	1.08294	0.13612	-0.210269	-0.309665	-0.475768	-0.606094	-0.411496	-0.717183	-1.03597	-1.03597	-1.03597	-1.03597	-1.03597	-1.03597
chr17:50508170_50508670	1.26487	1.26487	1.26487	1.26487	1.26487	1.26487	0.510176	0.510176	0.163764	0.10107	-0.119825	-0.676497	-0.676497	-0.784103	-1.10292	-1.10292	-1.10292	-1.10292	-1.10292	-1.10292
chr5:171437429_171437929	1.29811	1.29811	1.29811	1.29811	1.29811	1.29811	0.599216	0.257065	0.104174	-0.128672	-0.490421	-0.34331	-0.501198	-0.582841	-1.11711	-1.11711	-1.11711	-1.11711	-1.11711	-1.11711
chr20:49188166_49188666	1.33869	1.33869	1.33869	1.33869	1.33869	1.33869	0.402101	-0.365516	0.015289	0.239667	0.0339268	-0.716104	-0.774029	-1.17503	-0.948744	-0.948744	-0.948744	-0.948744	-0.948744	-0.948744
chr5:116378465_116378965	1.31707	1.31707	1.31707	1.31707	1.31707	1.31707	0.561955	0.451804	-0.336	-0.366091	-0.113832	-0.24345	-0.854349	-0.875987	-1.02108	-1.02108	-1.02108	-1.02108	-1.02108	-1.02108
chr11:1442056_1442556	1.18918	1.18918	1.18918	1.18918	1.18918	1.18918	0.871142	0.495482	0.495482	-0.109619	-0.109619	-0.334625	-0.754285	-0.785185	-1.15064	-1.15064	-1.15064	-1.15064	-1.15064	-1.15064
chr13:30445571_30446071	1.19809	1.19809	1.19809	1.19809	1.19809	1.19809	0.778942	0.548977	0.202197	-0.249239	0.202462	-0.636675	-0.441857	-0.43165	-1.19362	-1.19362	-1.19362	-1.19362	-1.19362	-1.19362
chr19:12194700_12195200	0.873714	0.873714	0.873714	0.873714	0.873714	0.873714	0.586309	0.846167	0.499384	0.436623	0.582261	0.658748	0.171619	-0.643722	-1.39661	-1.39661	-1.39661	-1.39661	-1.39661	-1.39661
chr22:37403193_37403693	1.18296	1.18296	1.18296	1.18296	1.18296	1.18296	1.12264	0.588578	0.241666	-0.0346248	-0.200978	-0.517053	-0.92097	-1.13093	-1.04102	-1.04102	-1.04102	-1.04102	-1.04102	-1.04102
chr4:146945669_146946169	1.31647	1.31647	1.31647	1.31647	1.31647	1.31647	0.71643	0.373845	0.140431	-0.389662	-0.556016	-0.921722	-1.05642	-0.866021	-0.88995	-0.88995	-0.88995	-0.88995	-0.88995	-0.88995
chr15:75579161_75579661	1.18617	1.18617	1.18617	1.18617	1.18617	1.18617	1.07934	0.630565	0.283581	-0.394306	-0.31862	-0.212837	-0.632782	-0.843086	-1.11815	-1.11815	-1.11815	-1.11815	-1.11815	-1.11815
chr20:13995188_13995688	1.31549	1.31549	1.31549	1.31549	1.31549	1.31549	0.61545	0.385312	0.0100054	-0.118416	-0.376303	-0.822276	-0.766633	-1.1216	-0.949746	-0.949746	-0.949746	-0.949746	-0.949746	-0.949746
chr20:62302466_62302966	1.29095	1.29095	1.29095	1.29095	1.29095	1.29095	0.181052	0.441216	-0.0361395	-0.435313	-0.180859	0.119915	-0.111838	-1.08287	-1.10681	-1.10681	-1.10681	-1.10681	-1.10681	-1.10681
chr2:158456589_158457089	1.10775	1.10775	1.10775	1.10775	1.10775	1.10775	0.781157	0.826834	0.866459	0.173348	-0.140758	-0.716446	-0.783063	-1.29475	-1.05988	-1.05988	-1.05988	-1.05988	-1.05988	-1.05988
chr5:149381798_149382298	1.18112	1.18112	1.18112	1.18112	1.18112	1.18112	0.651861	0.651861	0.157475	0.157475	0.157475	-0.142506	-0.742076	-0.951948	-1.17106	-1.17106	-1.17106	-1.17106	-1.17106	-1.17106
chrX:103215609_103216109	1.29135	1.29135	1.29135	1.29135	1.29135	1.29135	0.874666	0.588088	-0.0518373	-0.421996	-0.932964	-0.951064	-1.07981	-0.804203	-0.828164	-0.828164	-0.828164	-0.828164	-0.828164	-0.828164
chr7:88219826_88220326	1.34163	1.34163	1.34163	1.34163	1.34163	1.34163	0.701933	0.471527	-0.299166	-0.751469	-1.09693	-0.928516	-0.880665	-0.598067	-0.778066	-0.778066	-0.778066	-0.778066	-0.778066	-0.778066
chr1:72282580_72283080	1.31669	1.31669	1.31669	1.31669	1.31669	1.31669	0.666318	0.37967	0.197824	-0.550767	-1.14914	-1.18077	-0.985561	-0.79731	-0.746731	-0.746731	-0.746731	-0.746731	-0.746731	-0.746731
chr1:30538709_30539209	1.3062	1.3062	1.3062	1.3062	1.3062	1.3062	0.548797	0.172151	0.348901	-0.182329	-0.189906	-0.620712	-0.842971	-1.05354	-1.00294	-1.00294	-1.00294	-1.00294	-1.00294	-1.00294
chr2:69914413_69914913	1.3219	1.3219	1.3219	1.3219	1.3219	1.3219	0.881987	0.0362469	-0.0106485	-0.208915	-0.561684	-0.785065	-0.939598	-0.574052	-0.961617	-0.961617	-0.961617	-0.961617	-0.961617	-0.961617
chr2:97663877_97664377	1.30286	1.30286	1.30286	1.30286	1.30286	1.30286	0.31553	-0.381022	0.294026	-0.291483	0.349371	-0.0373734	-0.65906	-1.00454	-1.0671	-1.0671	-1.0671	-1.0671	-1.0671	-1.0671
chr2:151409603_151410103	1.03836	1.03836	1.03836	1.03836	1.03836	1.03836	0.977891	0.995764	0.813754	0.282332	-0.0983624	-0.488942	-0.977476	-0.828113	-1.15117	-1.15117	-1.15117	-1.15117	-1.15117	-1.15117
chr11:134299795_134300295	1.31358	1.31358	1.31358	1.31358	1.31358	1.31358	0.359156	0.517796	0.169983	-0.580594	-0.580594	-0.580594	-0.2693	-0.47981	-1.07292	-1.07292	-1.07292	-1.07292	-1.07292	-1.07292
chr2:218270097_218270597	1.18059	1.18059	1.18059	1.18059	1.18059	1.18059	1.08431	0.234647	0.039142	-0.0404572	-0.344168	0.108412	-0.328738	-0.54019	-1.21609	-1.21609	-1.21609	-1.21609	-1.21609	-1.21609
chr4:128060941_128061441	1.32247	1.32247	1.32247	1.32247	1.32247	1.32247	1.01245	-0.198437	-1.41698	-1.15411	-0.811157	-0.940635	-0.78874	-0.721232	-0.485996	-0.485996	-0.485996	-0.485996	-0.485996	-0.485996
chr7:45768774_45769274	1.3551	1.3551	1.3551	1.3551	1.3551	1.3551	0.820991	0.0656723	-0.905346	-1.1826	-1.10667	-0.858417	-0.669791	-0.800731	-0.582284	-0.582284	-0.582284	-0.582284	-0.582284	-0.582284
chr3:48465501_48466001	1.36109	1.36109	1.36109	1.36109	1.36109	1.36109	0.590128	0.449495	-0.559857	-0.837138	-1.00409	-0.953441	-0.641842	-0.432387	-0.796234	-0.796234	-0.796234	-0.796234	-0.796234	-0.796234
chr4:22515827_22516327	1.235	1.235	1.235	1.235	1.235	1.235	0.989658	0.5745	-0.499469	-1.1981	-1.5	-1.21746	-0.82997	-0.449852	-0.512489	-0.512489	-0.512489	-0.512489	-0.512489	-0.512489
chr19:18437174_18437674	1.12982	1.12982	1.12982	1.12982	1.12982	1.12982	0.923781	0.387645	0.140466	0.424556	0.372426	-0.271091	-0.588917	-0.96389	-1.20065	-1.20065	-1.20065	-1.20065	-1.20065	-1.20065
chr3:125916326_125916826	1.31057	1.31057	1.31057	1.31057	1.31057	1.31057	0.88171	0.275414	-0.528183	-1.22744	-0.642683	-0.00418112	-0.995597	-1.14377	-0.746449	-0.746449	-0.746449	-0.746449	-0.746449	-0.746449
chr6:170584398_170584898	1.33755	1.33755	1.33755	1.33755	1.33755	1.33755	0.622623	0.307653	-0.180339	-1.0637	-1.0076	-1.33675	-1.10396	-0.652516	-0.601784	-0.601784	-0.601784	-0.601784	-0.601784	-0.601784
chr2:188326640_188327140	1.3317	1.3317	1.3317	1.3317	1.3317	1.3317	1.02102	0.0682171	-0.942366	-0.463059	-0.43164	-0.995889	-0.540207	-0.540207	-0.861013	-0.861013	-0.861013	-0.861013	-0.861013	-0.861013
chr18:35267313_35267813	1.20276	1.20276	1.20276	1.20276	1.20276	1.20276	0.968862	0.711554	0.210349	-0.237615	-0.193145	-0.437856	-0.8598	-0.899315	-1.07993	-1.07993	-1.07993	-1.07993	-1.07993	-1.07993
chr10:13299362_13299862	1.29751	1.29751	1.29751	1.29751	1.29751	1.29751	0.766137	0.321786	-0.943054	-1.1419	-1.37362	-1.16983	-1.14895	-0.688347	-0.401209	-0.401209	-0.401209	-0.401209	-0.401209	-0.401209
chr3:119468708_119469208	1.25869	1.25869	1.25869	1.25869	1.25869	1.25869	1.06876	0.51679	-0.3211	-0.48329	-0.466571	-0.44834	-0.384623	-0.692407	-1.05689	-1.05689	-1.05689	-1.05689	-1.05689	-1.05689
chr3:11846723_11847223	1.14852	1.14852	1.14852	1.14852	1.14852	1.14852	0.859422	0.514951	0.447704	0.331208	-0.181875	-0.266894	-0.577096	-0.788217	-1.20505	-1.20505	-1.20505	-1.20505	-1.20505	-1.20505
chr3:138608815_138609315	1.21993	1.21993	1.21993	1.21993	1.21993	1.21993	0.91917	0.769709	0.268117	-0.340747	-0.665254	-0.554913	-0.534014	-0.837306	-1.05739	-1.05739	-1.05739	-1.05739	-1.05739	-1.05739
chr17:73164665_73165165	1.29328	1.29328	1.29328	1.29328	1.29328	1.29328	0.335788	0.335788	0.335788	-0.415951	-1.01684	-0.698373	-1.5	-1.49229	-0.586385	-0.586385	-0.586385	-0.586385	-0.586385	-0.586385
chr12:56315845_56316345	1.31301	1.31301	1.31301	1.31301	1.31301	1.31301	0.784531	0.186491	-1.03609	-1.34694	-1.31548	-0.724896	0.0481207	-0.618481	-0.642553	-0.642553	-0.642553	-0.642553	-0.642553	-0.642553
chr7:38631242_38631742	1.27967	1.27967	1.27967	1.27967	1.27967	1.27967	1.12945	0.531405	-0.365345	-0.564343	-0.786888	-0.846154	-0.846154	-0.569265	-0.89345	-0.89345	-0.89345	-0.89345	-0.89345	-0.89345
chr3:196081903_196082403	1.14442	1.14442	1.14442	1.14442	1.14442	1.14442	0.777357	0.681888	0.545462	-0.136405	-0.282463	0.0718751	-0.498686	-0.710869	-1.21911	-1.21911	-1.21911	-1.21911	-1.21911	-1.21911
chr11:8225468_8225968	1.1001	1.1001	1.1001	1.1001	1.1001	1.1001	1.06765	1.06765	0.424692	0.13904	-0.462028	-0.593349	-0.620404	-1.02075	-1.10052	-1.10052	-1.10052	-1.10052	-1.10052	-1.10052
chr2:134389302_134389802	1.16452	1.16452	1.16452	1.16452	1.16452	1.16452	1.16452	0.209931	0.209931	0.342045	0.0518146	-0.426801	-1.02962	-1.02962	-1.07989	-1.07989	-1.07989	-1.07989	-1.07989	-1.07989
chr4:104132544_104133044	1.16524	1.16524	1.16524	1.16524	1.16524	1.16524	1.16524	0.877098	0.233688	-0.0521631	-0.65365	-0.804409	-0.804409	-0.804409	-1.02473	-1.02473	-1.02473	-1.02473	-1.02473	-1.02473
chr1:37149304_37149804	1.14058	1.14058	1.14058	1.14058	1.14058	1.14058	0.829258	0.291508	0.573471	0.201267	-0.123613	0.0929171	-0.422101	-0.994879	-1.21522	-1.21522	-1.21522	-1.21522	-1.21522	-1.21522
chr3:50568881_50569381	1.15476	1.15476	1.15476	1.15476	1.15476	1.15476	0.00595948	0.517713	1.07876	0.581357	-0.081271	-0.79239	-0.723769	-1.01966	-1.08254	-1.08254	-1.08254	-1.08254	-1.08254	-1.08254
chr1:6087382_6087882	1.23568	1.23568	1.23568	1.23568	1.23568	1.23568	0.945876	0.453606	-0.19055	-0.19055	-0.19055	-0.19055	-0.414104	-0.815194	-1.13701	-1.13701	-1.13701	-1.13701	-1.13701	-1.13701
chr15:68054003_68054503	1.41494	1.41494	1.41494	1.41494	1.41494	1.41494	0.265538	-0.0798713	-0.283151	-0.257534	-0.679823	-0.711656	-0.841288	-0.533521	-0.894726	-0.894726	-0.894726	-0.894726	-0.894726	-0.894726
chr2:238234208_238234708	1.07509	1.07509	1.07509	1.07509	1.07509	1.07509	0.947666	0.947666	0.744233	0.403696	-0.440521	-1.08318	-0.708593	-0.678825	-1.09711	-1.09711	-1.09711	-1.09711	-1.09711	-1.09711
chr8:545247_545747	1.10202	1.10202	1.10202	1.10202	1.10202	1.10202	0.780909	0.822617	0.755123	0.4686	-0.449795	-0.480927	-0.710586	-1.01492	-1.13052	-1.13052	-1.13052	-1.13052	-1.13052	-1.13052
chr6:166005874_166006374	1.2054	1.2054	1.2054	1.2054	1.2054	1.2054	0.0655048	0.372358	0.304855	0.499755	-0.103236	0.101381	-0.225102	-1.10291	-1.19083	-1.19083	-1.19083	-1.19083	-1.19083	-1.19083
chr5:43514964_43515464	1.21754	1.21754	1.21754	1.21754	1.21754	1.21754	1.15666	0.108075	0.390744	-0.144337	-0.734034	-0.778345	-1.5	-1.03375	-0.761889	-0.761889	-0.761889	-0.761889	-0.761889	-0.761889
chr6:107114178_107114678	1.19061	1.19061	1.19061	1.19061	1.19061	1.19061	1.19061	0.803883	0.0507301	-0.633432	-0.704269	-0.964644	-0.677586	-1.5	-0.764102	-0.764102	-0.764102	-0.764102	-0.764102	-0.764102
chr3:133894907_133895407	1.24304	1.24304	1.24304	1.24304	1.24304	1.24304	1.02117	0.319657	0.116099	-0.0380516	-0.46092	-0.572117	-0.47115	-0.863895	-1.08484	-1.08484	-1.08484	-1.08484	-1.08484	-1.08484
chr22:46150162_46150662	1.08663	1.08663	1.08663	1.08663	1.08663	1.08663	0.978767	0.746454	0.746454	-0.0082841	0.0481094	-0.453131	-0.764668	-0.585079	-1.20473	-1.20473	-1.20473	-1.20473	-1.20473	-1.20473
chr8:142278607_142279107	1.11509	1.11509	1.11509	1.11509	1.11509	1.11509	1.11509	0.905615	0.288206	-0.0851107	-0.0851107	-0.292151	-0.716167	-0.927849	-1.14885	-1.14885	-1.14885	-1.14885	-1.14885	-1.14885
chr6:73520909_73521409	1.24216	1.24216	1.24216	1.24216	1.24216	1.24216	1.04136	0.752264	-0.15056	-0.388168	-0.716659	-0.656256	-0.594919	-0.628054	-1.01866	-1.01866	-1.01866	-1.01866	-1.01866	-1.01866
chr14:24079556_24080056	1.1314	1.1314	1.1314	1.1314	1.1314	1.1314	0.511809	0.833522	0.769225	0.179089	0.106521	-0.492817	-0.920804	-1.07602	-1.11648	-1.11648	-1.11648	-1.11648	-1.11648	-1.11648
chr4:27108838_27109338	1.16992	1.16992	1.16992	1.16992	1.16992	1.16992	0.749298	0.46001	0.46001	0.219008	-0.00460079	-0.323127	-0.459283	-1.0343	-1.18109	-1.18109	-1.18109	-1.18109	-1.18109	-1.18109
chr7:44100319_44100819	1.12593	1.12593	1.12593	1.12593	1.12593	1.12593	1.12593	0.975702	0.242076	0.0421113	-0.28406	-0.677906	-0.793355	-0.695951	-1.11502	-1.11502	-1.11502	-1.11502	-1.11502	-1.11502
chr20:64156132_64156632	1.25918	1.25918	1.25918	1.25918	1.25918	1.25918	0.929385	-0.0640244	0.281462	-0.0597461	-0.408472	-0.398324	-0.398324	-0.703199	-1.12231	-1.12231	-1.12231	-1.12231	-1.12231	-1.12231
chr2:42910994_42911494	1.35742	1.35742	1.35742	1.35742	1.35742	1.35742	0.815111	-0.143619	-0.143619	-0.51736	-0.47262	-0.490895	-0.899277	-0.709251	-0.930502	-0.930502	-0.930502	-0.930502	-0.930502	-0.930502
chr10:2734801_2735301	1.18769	1.18769	1.18769	1.18769	1.18769	1.18769	0.896899	0.477916	0.294295	0.294295	-0.309924	-0.465174	-0.465174	-1.12132	-1.12132	-1.12132	-1.12132	-1.12132	-1.12132	-1.12132
chr9:99184465_99184965	1.27228	1.27228	1.27228	1.27228	1.27228	1.27228	0.635643	0.216524	0.363522	-0.392624	-0.392624	-0.283224	-0.419499	-0.467033	-1.14906	-1.14906	-1.14906	-1.14906	-1.14906	-1.14906
chr10:23438680_23439180	1.36874	1.36874	1.36874	1.36874	1.36874	1.36874	0.648743	-0.0385091	-0.0465821	-0.563113	-0.89212	-0.387172	-1.07469	-0.94241	-0.819433	-0.819433	-0.819433	-0.819433	-0.819433	-0.819433
chr4:336245_336745	1.11167	1.11167	1.11167	1.11167	1.11167	1.11167	0.960573	0.960573	0.602939	0.066549	-0.357264	-0.463851	-0.784213	-0.903817	-1.12525	-1.12525	-1.12525	-1.12525	-1.12525	-1.12525
chr12:53492842_53493342	1.19868	1.19868	1.19868	1.19868	1.19868	1.19868	0.550136	0.508573	0.453673	0.34141	0.0764333	-0.572805	-0.923132	-1.07238	-1.09233	-1.09233	-1.09233	-1.09233	-1.09233	-1.09233
chr8:73878674_73879174	1.15972	1.15972	1.15972	1.15972	1.15972	1.15972	0.72554	0.643093	-0.155083	-0.129364	0.129432	0.238893	-0.367265	-0.49558	-1.25799	-1.25799	-1.25799	-1.25799	-1.25799	-1.25799
chr2:109173313_109173813	1.18144	1.18144	1.18144	1.18144	1.18144	1.18144	1.12037	0.773507	-0.129003	-0.129003	-0.129003	-0.408394	-0.632945	-1.03582	-1.08639	-1.08639	-1.08639	-1.08639	-1.08639	-1.08639
chr17:1143437_1143937	1.16772	1.16772	1.16772	1.16772	1.16772	1.16772	0.74639	0.595921	0.595921	0.399469	-0.205431	-0.850331	-0.850331	-1.06256	-1.06256	-1.06256	-1.06256	-1.06256	-1.06256	-1.06256
chr11:59615070_59615570	1.03511	1.03511	1.03511	1.03511	1.03511	1.03511	1.00245	1.00245	0.651143	0.193812	0.0784665	-0.316072	-0.63998	-1.04294	-1.19	-1.19	-1.19	-1.19	-1.19	-1.19
chr14:99605288_99605788	1.22771	1.22771	1.22771	1.22771	1.22771	1.22771	0.897347	0.897347	0.250149	-0.506764	-0.83353	-0.942983	-1.17082	-0.807653	-0.85823	-0.85823	-0.85823	-0.85823	-0.85823	-0.85823
chr1:23019157_23019657	1.15164	1.15164	1.15164	1.15164	1.15164	1.15164	1.1107	0.819127	0.446325	0.0719515	-0.593995	-0.840754	-0.956415	-0.847968	-1.0198	-1.0198	-1.0198	-1.0198	-1.0198	-1.0198
chr7:105531916_105532416	1.22085	1.22085	1.22085	1.22085	1.22085	1.22085	0.592013	0.6235	0.374092	-0.12588	-0.452706	-0.442539	-0.153692	-0.713239	-1.17111	-1.17111	-1.17111	-1.17111	-1.17111	-1.17111
chr3:57948112_57948612	1.09419	1.09419	1.09419	1.09419	1.09419	1.09419	0.985971	0.566236	0.498474	0.397613	-0.026752	-0.158998	-0.584401	-0.987568	-1.20929	-1.20929	-1.20929	-1.20929	-1.20929	-1.20929
chr1:205256092_205256592	1.03648	1.03648	1.03648	1.03648	1.03648	1.03648	0.828146	0.537652	0.638393	0.350205	0.0885353	0.226886	-0.445075	-0.484986	-1.32644	-1.32644	-1.32644	-1.32644	-1.32644	-1.32644
chr2:217756450_217756950	1.01797	1.01797	1.01797	1.01797	1.01797	1.01797	0.726024	0.435421	0.435421	0.746727	0.791661	-0.133459	-0.709322	-0.922161	-1.24636	-1.24636	-1.24636	-1.24636	-1.24636	-1.24636
chr7:22193530_22194030	1.40933	1.40933	1.40933	1.40933	1.40933	1.40933	0.442513	-0.214178	-0.214178	-0.411227	-0.526907	-0.636669	-0.861913	-0.861913	-0.861913	-0.861913	-0.861913	-0.861913	-0.861913	-0.861913
chr18:79069021_79069521	1.33425	1.33425	1.33425	1.33425	1.33425	1.33425	0.949615	0.227329	-0.921337	-0.825354	-0.564754	-1.05484	-0.898533	-1.05054	-0.644519	-0.644519	-0.644519	-0.644519	-0.644519	-0.644519
chr4:15469541_15470041	1.16356	1.16356	1.16356	1.16356	1.16356	1.16356	0.871489	0.580769	0.580769	-0.107713	-0.223419	-0.630718	-0.432739	-0.432739	-1.19784	-1.19784	-1.19784	-1.19784	-1.19784	-1.19784
chr2:98444571_98445071	1.20594	1.20594	1.20594	1.20594	1.20594	1.20594	1.14466	0.58686	0.222106	-0.208611	-0.417866	-0.799971	-0.609	-1.18325	-0.995093	-0.995093	-0.995093	-0.995093	-0.995093	-0.995093
chr2:23554304_23554804	1.13275	1.13275	1.13275	1.13275	1.13275	1.13275	0.840578	0.549755	0.344873	0.61845	-0.0732209	-0.469131	-0.585185	-0.989543	-1.17218	-1.17218	-1.17218	-1.17218	-1.17218	-1.17218
chr12:132603052_132603552	0.958747	0.958747	0.958747	0.958747	0.958747	0.958747	0.925974	0.665774	0.765854	0.826604	0.352129	-0.0659377	-1.03216	-1.5	-1.11306	-1.11306	-1.11306	-1.11306	-1.11306	-1.11306
chr1:87328243_87328743	1.24902	1.24902	1.24902	1.24902	1.24902	1.24902	0.809313	0.516562	0.0144733	-0.0727406	0.0754092	-1.1145	-1.01654	-0.882088	-0.970666	-0.970666	-0.970666	-0.970666	-0.970666	-0.970666
chr10:68075065_68075565	1.21382	1.21382	1.21382	1.21382	1.21382	1.21382	0.687719	0.604889	0.230539	0.19991	-0.314596	-0.647795	-0.456634	-0.596012	-1.16516	-1.16516	-1.16516	-1.16516	-1.16516	-1.16516
chr3:157159988_157160488	1.33585	1.33585	1.33585	1.33585	1.33585	1.33585	1.05773	0.00108782	-0.609323	-0.813502	-0.556155	-0.555187	-0.998683	-1.13809	-0.733829	-0.733829	-0.733829	-0.733829	-0.733829	-0.733829
chr12:121888458_121888958	1.18115	1.18115	1.18115	1.18115	1.18115	1.18115	0.411139	0.176755	0.637626	0.433113	-0.0823357	-0.00132356	-0.522447	-0.883964	-1.20925	-1.20925	-1.20925	-1.20925	-1.20925	-1.20925
chr2:196926809_196927309	1.04676	1.04676	1.04676	1.04676	1.04676	1.04676	0.722542	0.987423	0.869457	0.0395101	-0.0855515	-0.348374	-0.360304	-0.485309	-1.26999	-1.26999	-1.26999	-1.26999	-1.26999	-1.26999
chr6:3063623_3064123	1.30004	1.30004	1.30004	1.30004	1.30004	1.30004	0.875974	0.00664475	-0.216225	0.27519	-0.333628	-0.909726	-0.977536	-0.910656	-0.935041	-0.935041	-0.935041	-0.935041	-0.935041	-0.935041
chr2:120509975_120510475	1.11146	1.11146	1.11146	1.11146	1.11146	1.11146	0.818422	0.818422	0.464838	0.221833	-0.00363489	-0.136668	-0.746994	-1.29474	-1.13504	-1.13504	-1.13504	-1.13504	-1.13504	-1.13504
chr9:97633260_97633760	1.02063	1.02063	1.02063	1.02063	1.02063	1.02063	0.317851	0.592067	0.88479	0.474485	0.671435	-0.161482	-0.397672	-0.690395	-1.30248	-1.30248	-1.30248	-1.30248	-1.30248	-1.30248
chr1:25810670_25811170	1.16406	1.16406	1.16406	1.16406	1.16406	1.16406	1.10252	0.719119	0.0671979	0.0671979	-0.36007	-0.516662	-0.43435	-0.648176	-1.16352	-1.16352	-1.16352	-1.16352	-1.16352	-1.16352
chr1:26620167_26620667	1.24747	1.24747	1.24747	1.24747	1.24747	1.24747	0.816563	0.24493	0.213075	-0.928075	-1.5	-1.5	-1.07779	-0.866139	-0.463217	-0.463217	-0.463217	-0.463217	-0.463217	-0.463217
chr2:130987720_130988220	1.23147	1.23147	1.23147	1.23147	1.23147	1.23147	0.568433	0.842959	0.346959	-0.0120528	-0.488792	-0.705033	-1.28412	-1.11311	-0.924007	-0.924007	-0.924007	-0.924007	-0.924007	-0.924007
chr11:64675311_64675811	1.21852	1.21852	1.21852	1.21852	1.21852	1.21852	1.15691	0.38814	0.0214486	-0.0631662	-0.289105	-0.555055	-0.555055	-0.867744	-1.09125	-1.09125	-1.09125	-1.09125	-1.09125	-1.09125
chr12:98894668_98895168	0.95257	0.95257	0.95257	0.95257	0.95257	0.95257	0.800018	0.254392	0.540485	0.539572	0.486518	0.296997	0.247327	-0.542746	-1.38966	-1.38966	-1.38966	-1.38966	-1.38966	-1.38966
chr14:52552497_52552997	1.22489	1.22489	1.22489	1.22489	1.22489	1.22489	1.09513	0.672529	-0.936085	-1.23516	-1.06881	-1.09273	-1.32524	-0.843525	-0.435912	-0.435912	-0.435912	-0.435912	-0.435912	-0.435912
chr7:130345093_130345593	1.30643	1.30643	1.30643	1.30643	1.30643	1.30643	1.01266	0.356199	-0.29676	-0.758193	-0.8836	-1.28168	-0.934996	-0.721748	-0.721748	-0.721748	-0.721748	-0.721748	-0.721748	-0.721748
chr18:59139561_59140061	1.24686	1.24686	1.24686	1.24686	1.24686	1.24686	0.722373	0.625379	-0.116414	-0.392779	-0.388121	-0.135253	-0.448285	-0.389846	-1.1597	-1.1597	-1.1597	-1.1597	-1.1597	-1.1597
chr1:168613568_168614068	0.991041	0.991041	0.991041	0.991041	0.991041	0.991041	0.991041	0.991041	0.636243	0.17437	0.17437	0.0408798	-0.388523	-1.03183	-1.25564	-1.25564	-1.25564	-1.25564	-1.25564	-1.25564
chr4:76459127_76459627	1.38254	1.38254	1.38254	1.38254	1.38254	1.38254	0.72898	-0.0412135	-0.546452	-0.648313	-0.389961	-0.620308	-0.847247	-0.847247	-0.847247	-0.847247	-0.847247	-0.847247	-0.847247	-0.847247
chr8:129939713_129940213	1.36522	1.36522	1.36522	1.36522	1.36522	1.36522	0.737435	-0.103217	-0.608719	-0.34032	-0.164577	-0.577445	-0.944575	-0.67731	-0.918763	-0.918763	-0.918763	-0.918763	-0.918763	-0.918763
chr3:127135568_127136068	1.23215	1.23215	1.23215	1.23215	1.23215	1.23215	1.05759	0.395363	0.0400658	-0.338525	-0.0799404	-0.386782	-0.613925	-1.11101	-1.05929	-1.05929	-1.05929	-1.05929	-1.05929	-1.05929
chr2:78411385_78411885	1.23101	1.23101	1.23101	1.23101	1.23101	1.23101	0.680978	0.690844	0.0507476	0.0507476	0.0828117	-0.861338	-1.08876	-0.806527	-1.03093	-1.03093	-1.03093	-1.03093	-1.03093	-1.03093
chr11:47980288_47980788	1.26096	1.26096	1.26096	1.26096	1.26096	1.26096	0.934575	0.271303	-0.230793	-0.169474	-0.340117	-0.574306	-0.336612	-0.282814	-1.13959	-1.13959	-1.13959	-1.13959	-1.13959	-1.13959
chr2:24971835_24972335	1.19405	1.19405	1.19405	1.19405	1.19405	1.19405	1.06451	0.189465	-0.312634	0.417331	0.246688	-0.410292	-0.910169	-1.19386	-1.04256	-1.04256	-1.04256	-1.04256	-1.04256	-1.04256
chr1:85259487_85259987	1.07981	1.07981	1.07981	1.07981	1.07981	1.07981	0.85438	0.701931	0.669919	0.212648	-0.0831042	-0.505111	-0.305183	-0.35338	-1.2785	-1.2785	-1.2785	-1.2785	-1.2785	-1.2785
chr1:33436756_33437256	1.09865	1.09865	1.09865	1.09865	1.09865	1.09865	0.763812	0.611276	0.79231	0.59316	-0.0200505	-1.03166	-1.36368	-1.12886	-0.968032	-0.968032	-0.968032	-0.968032	-0.968032	-0.968032
chr9:113541149_113541649	1.10599	1.10599	1.10599	1.10599	1.10599	1.10599	0.788516	0.240149	0.527679	0.328464	0.157657	0.0236395	-0.204081	-0.788166	-1.28496	-1.28496	-1.28496	-1.28496	-1.28496	-1.28496
chr16:67806486_67806986	1.21949	1.21949	1.21949	1.21949	1.21949	1.21949	0.38178	0.730055	0.344707	0.256613	-0.295598	-0.381888	-1.34868	-0.63774	-1.06103	-1.06103	-1.06103	-1.06103	-1.06103	-1.06103
chr6:42190826_42191326	1.1457	1.1457	1.1457	1.1457	1.1457	1.1457	0.709431	1.11723	0.26097	-0.246135	-0.188762	-0.110152	-0.635647	-0.761687	-1.16991	-1.16991	-1.16991	-1.16991	-1.16991	-1.16991
chrX:135098626_135099126	1.15724	1.15724	1.15724	1.15724	1.15724	1.15724	0.83023	0.848552	0.231801	-0.163706	-0.611136	-0.197512	-0.00432829	-0.713576	-1.19396	-1.19396	-1.19396	-1.19396	-1.19396	-1.19396
chr21:33915674_33916174	1.26407	1.26407	1.26407	1.26407	1.26407	1.26407	0.724092	0.640372	-0.0165124	-0.21984	-0.367208	-0.399662	-0.538117	-0.981471	-1.07101	-1.07101	-1.07101	-1.07101	-1.07101	-1.07101
chr20:40502496_40502996	1.05901	1.05901	1.05901	1.05901	1.05901	1.05901	1.05901	0.764664	0.407865	0.208315	0.208315	-0.192389	-0.420493	-1.00556	-1.23063	-1.23063	-1.23063	-1.23063	-1.23063	-1.23063
chr16:30027912_30028412	1.18782	1.18782	1.18782	1.18782	1.18782	1.18782	0.753476	0.753476	0.11121	0.246242	0.0186307	-0.554966	-0.789117	-1.09512	-1.09512	-1.09512	-1.09512	-1.09512	-1.09512	-1.09512
chr15:64856642_64857142	1.24914	1.24914	1.24914	1.24914	1.24914	1.24914	0.953181	0.800205	0.00807944	-0.537591	-0.609827	-0.609827	-1.02562	-1.04791	-0.904259	-0.904259	-0.904259	-0.904259	-0.904259	-0.904259
chr3:193816795_193817295	0.992792	0.992792	0.992792	0.992792	0.992792	0.992792	-0.0808536	-0.43358	0.868868	0.804224	0.656612	0.624104	0.0673365	-0.600631	-1.31047	-1.31047	-1.31047	-1.31047	-1.31047	-1.31047
chr4:6783414_6783914	1.30016	1.30016	1.30016	1.30016	1.30016	1.30016	0.41821	0.465192	-0.0388527	-0.140233	-0.722719	-0.45215	-0.136902	-0.514589	-1.11315	-1.11315	-1.11315	-1.11315	-1.11315	-1.11315
chr20:47150595_47151095	1.10962	1.10962	1.10962	1.10962	1.10962	1.10962	0.999622	0.999622	0.642357	-0.127335	-0.459618	-0.568097	-0.59579	-0.712422	-1.13934	-1.13934	-1.13934	-1.13934	-1.13934	-1.13934
chr10:70679585_70680085	1.0198	1.0198	1.0198	1.0198	1.0198	1.0198	0.825234	0.363152	0.544792	0.606356	0.663868	0.00708099	-0.731447	-0.753752	-1.27402	-1.27402	-1.27402	-1.27402	-1.27402	-1.27402
chr14:101953030_101953530	1.1121	1.1121	1.1121	1.1121	1.1121	1.1121	1.1121	0.685281	0.327853	0.225289	-0.107146	-0.31837	-0.546876	-0.956852	-1.18232	-1.18232	-1.18232	-1.18232	-1.18232	-1.18232
chr3:100260643_100261143	1.26779	1.26779	1.26779	1.26779	1.26779	1.26779	0.924157	0.770999	-0.265552	-0.292442	-0.994992	-0.942981	-0.970695	-1.07153	-0.793948	-0.793948	-0.793948	-0.793948	-0.793948	-0.793948
chr7:112939771_112940271	1.40315	1.40315	1.40315	1.40315	1.40315	1.40315	0.596573	-0.474205	-0.227258	-0.378077	-0.765129	-0.787058	-0.676914	-0.528552	-0.863051	-0.863051	-0.863051	-0.863051	-0.863051	-0.863051
chr22:46738072_46738572	1.12594	1.12594	1.12594	1.12594	1.12594	1.12594	0.378859	0.902332	0.744533	0.307529	-0.375065	-0.316138	-0.392801	-0.691902	-1.21883	-1.21883	-1.21883	-1.21883	-1.21883	-1.21883
chr14:88385388_88385888	1.06432	1.06432	1.06432	1.06432	1.06432	1.06432	0.767734	0.592438	-0.00727813	0.151843	0.413308	0.279481	-0.117686	-0.413738	-1.342	-1.342	-1.342	-1.342	-1.342	-1.342
chr14:35385380_35385880	1.1033	1.1033	1.1033	1.1033	1.1033	1.1033	0.355139	0.387227	0.111145	0.132786	0.622791	0.530179	-0.101001	-1.19268	-1.24423	-1.24423	-1.24423	-1.24423	-1.24423	-1.24423
chr13:74575642_74576142	1.07925	1.07925	1.07925	1.07925	1.07925	1.07925	0.884148	0.588609	0.401123	0.28148	0.28148	-0.0279091	-0.354853	-1.02481	-1.25079	-1.25079	-1.25079	-1.25079	-1.25079	-1.25079
chr2:241701197_241701697	1.28406	1.28406	1.28406	1.28406	1.28406	1.28406	0.734254	0.380371	-0.874984	-1.46701	-1.39856	-1.18915	-0.711147	-0.0537892	-0.520726	-0.520726	-0.520726	-0.520726	-0.520726	-0.520726
chr13:27171727_27172227	1.1954	1.1954	1.1954	1.1954	1.1954	1.1954	0.655658	-0.00998207	0.49653	0.322851	0.0297044	-0.00340018	-0.703585	-0.848196	-1.18533	-1.18533	-1.18533	-1.18533	-1.18533	-1.18533
chrX:141176900_141177400	1.35374	1.35374	1.35374	1.35374	1.35374	1.35374	0.572701	0.00532029	-0.0637943	-0.34932	-0.34932	-0.600961	-0.600961	-1.40014	-0.88933	-0.88933	-0.88933	-0.88933	-0.88933	-0.88933
chr2:175167967_175168467	1.0914	1.0914	1.0914	1.0914	1.0914	1.0914	1.07761	1.04311	0.133352	-0.428385	-0.078632	0.00472843	-0.307659	-0.753448	-1.20651	-1.20651	-1.20651	-1.20651	-1.20651	-1.20651
chr12:71839427_71839927	1.20915	1.20915	1.20915	1.20915	1.20915	1.20915	1.20915	0.657152	0.298594	-0.543259	-0.876744	-0.834613	-0.657918	-0.974343	-0.922149	-0.922149	-0.922149	-0.922149	-0.922149	-0.922149
chr3:24829037_24829537	1.33884	1.33884	1.33884	1.33884	1.33884	1.33884	0.792427	0.496592	-0.654412	-0.774175	-0.741853	-0.662758	-0.559383	-0.97071	-0.826457	-0.826457	-0.826457	-0.826457	-0.826457	-0.826457
chr9:131298122_131298622	1.08286	1.08286	1.08286	1.08286	1.08286	1.08286	1.08286	0.929135	0.418372	0.124679	-0.170781	-0.231722	-0.566324	-1.15477	-1.15477	-1.15477	-1.15477	-1.15477	-1.15477	-1.15477
chrX:14872954_14873454	1.40652	1.40652	1.40652	1.40652	1.40652	1.40652	0.542664	-0.62152	-0.69072	-1.23437	-0.537927	-0.428496	-0.328815	-0.451116	-0.781466	-0.781466	-0.781466	-0.781466	-0.781466	-0.781466
chr8:79827361_79827861	1.2364	1.2364	1.2364	1.2364	1.2364	1.2364	0.615316	0.319093	0.319093	0.264155	-0.00267604	-0.587809	-0.713858	-1.10812	-1.08726	-1.08726	-1.08726	-1.08726	-1.08726	-1.08726
chr5:134411702_134412202	1.10674	1.10674	1.10674	1.10674	1.10674	1.10674	0.809095	0.819055	0.459917	0.428737	-0.251991	-0.172779	-0.577317	-1.20983	-1.15755	-1.15755	-1.15755	-1.15755	-1.15755	-1.15755
chr22:46296528_46297028	1.29685	1.29685	1.29685	1.29685	1.29685	1.29685	0.86602	0.401482	-0.349887	-0.523921	-1.14612	-1.46053	-1.16529	-0.781431	-0.603569	-0.603569	-0.603569	-0.603569	-0.603569	-0.603569
chr1:158078591_158079091	1.19106	1.19106	1.19106	1.19106	1.19106	1.19106	0.643681	0.643681	0.132366	-0.0685524	0.192906	-0.388609	-0.233837	-0.866542	-1.20025	-1.20025	-1.20025	-1.20025	-1.20025	-1.20025
chr2:178892728_178893228	1.43322	1.43322	1.43322	1.43322	1.43322	1.43322	0.0960135	0.0960135	-0.565786	-0.766713	-0.386748	-0.599055	-0.828731	-0.851159	-0.798864	-0.798864	-0.798864	-0.798864	-0.798864	-0.798864
chr11:11968527_11969027	1.0203	1.0203	1.0203	1.0203	1.0203	1.0203	0.855033	0.185133	0.535734	0.73579	0.292197	-0.297087	0.115016	-0.536661	-1.3345	-1.3345	-1.3345	-1.3345	-1.3345	-1.3345
chr12:108390800_108391300	1.27865	1.27865	1.27865	1.27865	1.27865	1.27865	0.495405	0.198816	0.198816	0.167603	-0.0616495	-0.554363	-0.672718	-0.695162	-1.12478	-1.12478	-1.12478	-1.12478	-1.12478	-1.12478
chr15:73908225_73908725	1.1249	1.1249	1.1249	1.1249	1.1249	1.1249	0.948238	0.966716	0.304342	0.103241	-0.515974	-0.305853	-0.535728	-0.576483	-1.18965	-1.18965	-1.18965	-1.18965	-1.18965	-1.18965
chr14:23660328_23660828	1.32196	1.32196	1.32196	1.32196	1.32196	1.32196	0.434223	0.0791279	0.0791279	0.0791279	-0.44978	-0.662276	-0.485076	-0.401961	-1.10071	-1.10071	-1.10071	-1.10071	-1.10071	-1.10071
chr6:150302749_150303249	1.37267	1.37267	1.37267	1.37267	1.37267	1.37267	0.634963	-0.172235	-0.689236	-0.809338	-0.86317	-0.728829	-1.43325	-1.11301	-0.510316	-0.510316	-0.510316	-0.510316	-0.510316	-0.510316
chr5:155728241_155728741	1.19006	1.19006	1.19006	1.19006	1.19006	1.19006	0.755191	0.601068	0.219304	0.116064	-0.218564	-0.399595	-0.399595	-0.51705	-1.2162	-1.2162	-1.2162	-1.2162	-1.2162	-1.2162
chr18:48409236_48409736	1.14198	1.14198	1.14198	1.14198	1.14198	1.14198	0.821227	0.688485	0.619106	0.235632	-0.0990843	-0.837085	-0.542089	-0.945629	-1.13207	-1.13207	-1.13207	-1.13207	-1.13207	-1.13207
chr2:110204808_110205308	1.30544	1.30544	1.30544	1.30544	1.30544	1.30544	1.00702	0.121587	-0.0876831	-0.471372	-0.565494	-0.403546	-0.633748	-1.12419	-0.945874	-0.945874	-0.945874	-0.945874	-0.945874	-0.945874
chr3:13023093_13023593	1.21493	1.21493	1.21493	1.21493	1.21493	1.21493	0.986712	0.188662	0.290932	0.317318	-0.524476	-1.39625	-1.2962	-1.18928	-0.777827	-0.777827	-0.777827	-0.777827	-0.777827	-0.777827
chr8:143246567_143247067	1.26299	1.26299	1.26299	1.26299	1.26299	1.26299	0.418143	0.0816868	0.34215	0.0764032	0.262371	-0.405013	-1.37026	-1.1993	-0.964016	-0.964016	-0.964016	-0.964016	-0.964016	-0.964016
chr17:48636445_48636945	1.17998	1.17998	1.17998	1.17998	1.17998	1.17998	1.17998	1.17998	-0.368718	-0.570257	-0.800041	-0.648282	-1.08441	-1.1069	-0.810202	-0.810202	-0.810202	-0.810202	-0.810202	-0.810202
chr8:144094714_144095214	1.31868	1.31868	1.31868	1.31868	1.31868	1.31868	0.638879	0.338785	-0.34036	-0.171075	-0.385028	-0.535186	-1.32674	-0.341588	-0.96496	-0.96496	-0.96496	-0.96496	-0.96496	-0.96496
chr2:96265925_96266425	1.37263	1.37263	1.37263	1.37263	1.37263	1.37263	0.495362	-0.0497359	-0.0346356	-0.493632	-1.27019	-1.24442	-0.533361	-0.561235	-0.75732	-0.75732	-0.75732	-0.75732	-0.75732	-0.75732
chr3:9649095_9649595	1.1237	1.1237	1.1237	1.1237	1.1237	1.1237	1.06255	0.736731	-0.189623	0.315919	-0.174644	-0.00675327	-0.629053	-0.559085	-1.21637	-1.21637	-1.21637	-1.21637	-1.21637	-1.21637
chr13:26557329_26557829	1.20443	1.20443	1.20443	1.20443	1.20443	1.20443	0.84501	0.414881	-0.220486	-0.244572	-0.335215	0.0447093	-0.335815	-0.0164045	-1.22978	-1.22978	-1.22978	-1.22978	-1.22978	-1.22978
chr2:38075983_38076483	1.36906	1.36906	1.36906	1.36906	1.36906	1.36906	0.478652	0.181122	-0.17954	-0.512608	-0.606882	-0.383312	-0.613884	-0.613884	-0.994001	-0.994001	-0.994001	-0.994001	-0.994001	-0.994001
chr3:49120699_49121199	1.20407	1.20407	1.20407	1.20407	1.20407	1.20407	0.762492	0.788396	0.174668	-0.112645	-0.409662	-0.826604	-1.39883	-1.5	-0.752236	-0.752236	-0.752236	-0.752236	-0.752236	-0.752236
chr15:29822262_29822762	1.218	1.218	1.218	1.218	1.218	1.218	1.10692	0.809279	-0.0574973	-0.344842	-0.830401	-0.838385	-1.34519	-1.08432	-0.787261	-0.787261	-0.787261	-0.787261	-0.787261	-0.787261
chr5:43313273_43313773	1.21845	1.21845	1.21845	1.21845	1.21845	1.21845	0.680379	0.398913	0.131106	0.174378	0.151686	-0.210858	-1.0919	-1.24288	-1.05025	-1.05025	-1.05025	-1.05025	-1.05025	-1.05025
chr6:32153298_32153798	1.01357	1.01357	1.01357	1.01357	1.01357	1.01357	1.01357	0.715642	0.866899	0.396761	-0.0392603	-0.199061	-0.535797	-0.754004	-1.2577	-1.2577	-1.2577	-1.2577	-1.2577	-1.2577
chr11:117529678_117530178	1.23924	1.23924	1.23924	1.23924	1.23924	1.23924	0.917175	0.619072	-0.136859	-0.432595	-0.400025	-0.322437	-0.166757	-1.07265	-1.07339	-1.07339	-1.07339	-1.07339	-1.07339	-1.07339
chr11:43680295_43680795	1.19684	1.19684	1.19684	1.19684	1.19684	1.19684	1.06529	0.493339	0.396367	-0.121192	-0.574722	-0.22325	-1.11485	-0.863079	-1.03983	-1.03983	-1.03983	-1.03983	-1.03983	-1.03983
chr12:49980661_49981161	1.16884	1.16884	1.16884	1.16884	1.16884	1.16884	1.16884	0.612378	0.402307	0.106484	-0.515984	-0.944611	-0.788885	-1.00766	-1.00766	-1.00766	-1.00766	-1.00766	-1.00766	-1.00766
chr22:42867697_42868197	1.22329	1.22329	1.22329	1.22329	1.22329	1.22329	0.664298	0.664298	0.154193	0.0334519	0.0334519	-0.629392	-0.629392	-1.1352	-1.08257	-1.08257	-1.08257	-1.08257	-1.08257	-1.08257
chr3:184314843_184315343	1.26539	1.26539	1.26539	1.26539	1.26539	1.26539	1.17682	0.235024	-0.402156	-0.467592	-0.202251	-0.362238	-0.593389	-0.711426	-1.04418	-1.04418	-1.04418	-1.04418	-1.04418	-1.04418
chr12:752785_753285	1.14561	1.14561	1.14561	1.14561	1.14561	1.14561	0.705643	0.705643	0.202794	0.265097	-0.171432	-0.190271	-0.250709	-0.560678	-1.26329	-1.26329	-1.26329	-1.26329	-1.26329	-1.26329
chr3:57555789_57556289	1.25039	1.25039	1.25039	1.25039	1.25039	1.25039	0.479752	0.498333	0.632674	-0.0095236	-0.41955	-0.922952	-1.15743	-1.29343	-0.88504	-0.88504	-0.88504	-0.88504	-0.88504	-0.88504
chr3:39180746_39181246	1.34483	1.34483	1.34483	1.34483	1.34483	1.34483	0.556987	0.4236	0.0493482	-0.581719	-0.654869	-0.81096	-0.971677	-0.790694	-0.881498	-0.881498	-0.881498	-0.881498	-0.881498	-0.881498
chr11:62761258_62761758	1.07632	1.07632	1.07632	1.07632	1.07632	1.07632	0.320815	0.480292	0.664146	0.278808	0.241705	0.323178	-0.114492	-0.707479	-1.32415	-1.32415	-1.32415	-1.32415	-1.32415	-1.32415
chr2:68467236_68467736	1.15718	1.15718	1.15718	1.15718	1.15718	1.15718	0.480298	-0.0287963	0.516692	0.461364	0.530436	-0.207025	-0.445429	-1.10082	-1.19163	-1.19163	-1.19163	-1.19163	-1.19163	-1.19163
chr13:21458719_21459219	1.09979	1.09979	1.09979	1.09979	1.09979	1.09979	0.944106	0.962693	0.583321	0.0306405	-0.0235019	-0.519198	-0.753752	-1.07295	-1.12502	-1.12502	-1.12502	-1.12502	-1.12502	-1.12502
chr13:33204451_33204951	1.21313	1.21313	1.21313	1.21313	1.21313	1.21313	0.913342	0.614935	0.253211	-0.132227	-0.132227	-0.627962	-0.859214	-0.758746	-1.09165	-1.09165	-1.09165	-1.09165	-1.09165	-1.09165
chr12:82358282_82358782	1.26283	1.26283	1.26283	1.26283	1.26283	1.26283	1.19993	0.525724	-0.937721	-0.856178	-1.17203	-0.914081	-0.323677	-0.475033	-0.770649	-0.770649	-0.770649	-0.770649	-0.770649	-0.770649
chr7:23470434_23470934	1.37671	1.37671	1.37671	1.37671	1.37671	1.37671	0.560566	0.00353265	-0.370928	-0.169526	-0.616102	-0.404661	-0.825947	-0.87495	-0.927039	-0.927039	-0.927039	-0.927039	-0.927039	-0.927039
chr13:36346557_36347057	1.25825	1.25825	1.25825	1.25825	1.25825	1.25825	0.935666	0.378457	0.0165137	0.128524	-0.403859	-0.732626	-0.967341	-0.85992	-1.00749	-1.00749	-1.00749	-1.00749	-1.00749	-1.00749
chr4:21554999_21555499	1.231	1.231	1.231	1.231	1.231	1.231	0.918914	0.244122	0.667451	-0.250176	-0.481034	-0.694983	-0.610777	-0.829896	-1.05827	-1.05827	-1.05827	-1.05827	-1.05827	-1.05827
chr3:13574148_13574648	1.29369	1.29369	1.29369	1.29369	1.29369	1.29369	0.981583	0.549224	-0.612877	-0.475908	-0.803352	-0.487746	-0.515812	-0.62828	-0.961496	-0.961496	-0.961496	-0.961496	-0.961496	-0.961496
chr6:38639886_38640386	1.05921	1.05921	1.05921	1.05921	1.05921	1.05921	0.881315	0.782271	0.278695	0.587	0.0996895	-0.188333	-0.515705	-0.633912	-1.27438	-1.27438	-1.27438	-1.27438	-1.27438	-1.27438
chr9:12416623_12417123	1.36676	1.36676	1.36676	1.36676	1.36676	1.36676	0.700029	0.142529	-0.368422	-0.656837	-1.0169	-0.701238	-0.545223	-0.451153	-0.883893	-0.883893	-0.883893	-0.883893	-0.883893	-0.883893
chr1:16352283_16352783	1.23008	1.23008	1.23008	1.23008	1.23008	1.23008	1.03282	0.357706	-0.0171488	0.00937914	-0.259781	-1.09813	-1.5	-1.06937	-0.788166	-0.788166	-0.788166	-0.788166	-0.788166	-0.788166
chr17:44557058_44557558	1.27227	1.27227	1.27227	1.27227	1.27227	1.27227	0.826491	0.268793	0.0250527	-0.0063978	-0.0142931	-0.749472	-0.985816	-0.955008	-1.00716	-1.00716	-1.00716	-1.00716	-1.00716	-1.00716
chr9:97411792_97412292	1.25333	1.25333	1.25333	1.25333	1.25333	1.25333	1.16459	0.606829	-0.312447	-0.698499	-0.817453	-0.523441	-0.961922	-0.352974	-0.937445	-0.937445	-0.937445	-0.937445	-0.937445	-0.937445
chr1:206612308_206612808	1.30908	1.30908	1.30908	1.30908	1.30908	1.30908	0.10261	-0.26886	0.5022	0.255076	-0.0612839	-0.68076	-0.36104	-0.9223	-1.07002	-1.07002	-1.07002	-1.07002	-1.07002	-1.07002
chr3:88058957_88059457	1.18918	1.18918	1.18918	1.18918	1.18918	1.18918	0.324092	-0.561178	-1.5	-1.25781	-1.5	-1.5	-1.0748	-0.090907	0.036066	0.036066	0.036066	0.036066	0.036066	0.036066
chr12:110613789_110614289	1.3396	1.3396	1.3396	1.3396	1.3396	1.3396	0.898248	0.00636978	-0.298403	-0.852623	-0.490847	-0.254245	-0.725157	-0.656542	-0.944063	-0.944063	-0.944063	-0.944063	-0.944063	-0.944063
chr11:61042159_61042659	1.30992	1.30992	1.30992	1.30992	1.30992	1.30992	0.219346	0.219346	0.280769	-0.0161615	-0.247515	-0.502179	-0.502179	-0.51411	-1.1328	-1.1328	-1.1328	-1.1328	-1.1328	-1.1328
chr2:27356772_27357272	1.3289	1.3289	1.3289	1.3289	1.3289	1.3289	0.893627	0.266403	-0.53852	-0.19749	-0.64536	-0.760565	-0.995885	-1.12421	-0.811897	-0.811897	-0.811897	-0.811897	-0.811897	-0.811897
chr7:127588097_127588597	1.40769	1.40769	1.40769	1.40769	1.40769	1.40769	0.553705	-0.710807	-0.60769	-0.694437	-0.828773	-1.2117	-0.731452	-1.03528	-0.529954	-0.529954	-0.529954	-0.529954	-0.529954	-0.529954
chr10:73744105_73744605	1.35883	1.35883	1.35883	1.35883	1.35883	1.35883	0.699615	-0.105423	-0.0796997	-0.327588	-0.461988	-0.480923	-0.806685	-0.863254	-0.954509	-0.954509	-0.954509	-0.954509	-0.954509	-0.954509
chr19:53520492_53520992	1.1254	1.1254	1.1254	1.1254	1.1254	1.1254	0.445119	0.311636	0.306242	0.304656	0.358878	0.086078	-0.153523	-0.454197	-1.32621	-1.32621	-1.32621	-1.32621	-1.32621	-1.32621
chr2:39124160_39124660	1.34794	1.34794	1.34794	1.34794	1.34794	1.34794	0.740189	-0.687949	-0.917201	-1.38447	-1.11877	-0.965616	-0.915533	-0.759353	-0.34649	-0.34649	-0.34649	-0.34649	-0.34649	-0.34649
chr10:105187162_105187662	1.16459	1.16459	1.16459	1.16459	1.16459	1.16459	0.851082	0.869772	0.50609	-0.0496254	-0.506027	-0.453122	-0.594331	-1.25375	-1.0596	-1.0596	-1.0596	-1.0596	-1.0596	-1.0596
chr14:105176464_105176964	1.03365	1.03365	1.03365	1.03365	1.03365	1.03365	1.01966	0.585318	0.585318	0.231464	0.231464	-0.177019	-0.205213	-0.60458	-1.31139	-1.31139	-1.31139	-1.31139	-1.31139	-1.31139
chr1:9626954_9627454	1.03428	1.03428	1.03428	1.03428	1.03428	1.03428	1.03428	0.734153	0.370344	0.370344	0.138355	-0.270223	-0.203757	-0.520006	-1.30986	-1.30986	-1.30986	-1.30986	-1.30986	-1.30986
chr4:112285624_112286124	1.43345	1.43345	1.43345	1.43345	1.43345	1.43345	0.339867	-0.0945827	-0.764774	-0.627144	-0.700735	-0.690209	-0.831469	-0.747376	-0.747376	-0.747376	-0.747376	-0.747376	-0.747376	-0.747376
chr12:106357744_106358244	1.16907	1.16907	1.16907	1.16907	1.16907	1.16907	0.99013	0.555211	0.343542	0.370217	-0.508177	-0.36047	-0.884144	-1.00304	-1.08628	-1.08628	-1.08628	-1.08628	-1.08628	-1.08628
chr2:64453844_64454344	1.29403	1.29403	1.29403	1.29403	1.29403	1.29403	0.49975	0.49975	-0.308949	-0.0115421	0.0213188	-0.388124	-0.925665	-0.824404	-1.05438	-1.05438	-1.05438	-1.05438	-1.05438	-1.05438
chr14:105398248_105398748	1.09699	1.09699	1.09699	1.09699	1.09699	1.09699	0.984732	0.706073	0.202048	0.422383	-0.0276227	-0.359822	-0.200607	-0.962973	-1.22436	-1.22436	-1.22436	-1.22436	-1.22436	-1.22436
chrX:17635164_17635664	1.25226	1.25226	1.25226	1.25226	1.25226	1.25226	0.696594	0.696594	0.331909	-0.225338	-0.761754	-0.780755	-1.37692	-1.11324	-0.830112	-0.830112	-0.830112	-0.830112	-0.830112	-0.830112
chr6:143060635_143061135	1.08388	1.08388	1.08388	1.08388	1.08388	1.08388	0.885132	1.04193	0.517265	0.309169	-0.141262	-0.563062	-0.614209	-1.17957	-1.12645	-1.12645	-1.12645	-1.12645	-1.12645	-1.12645
chr6:32894467_32894967	1.25281	1.25281	1.25281	1.25281	1.25281	1.25281	0.950343	0.324961	0.428562	-0.357697	-0.757186	-0.419607	-0.652924	-0.873808	-1.02658	-1.02658	-1.02658	-1.02658	-1.02658	-1.02658
chr1:5889777_5890277	1.25817	1.25817	1.25817	1.25817	1.25817	1.25817	0.820331	0.578273	-0.0649881	0.00955434	-0.561922	-0.481413	-0.532568	-0.941869	-1.0624	-1.0624	-1.0624	-1.0624	-1.0624	-1.0624
chr4:5890111_5890611	1.2167	1.2167	1.2167	1.2167	1.2167	1.2167	0.891319	0.455365	-0.176162	-0.28092	0.250999	-0.210072	-0.734993	-0.537204	-1.15975	-1.15975	-1.15975	-1.15975	-1.15975	-1.15975
chr15:40038977_40039477	1.17294	1.17294	1.17294	1.17294	1.17294	1.17294	0.731615	0.513303	0.808034	0.094713	-0.205903	-0.55074	-1.26593	-0.94466	-1.03634	-1.03634	-1.03634	-1.03634	-1.03634	-1.03634
chr11:118908940_118909440	1.26828	1.26828	1.26828	1.26828	1.26828	1.26828	0.942795	0.507116	-0.370235	-0.505372	-0.472456	-0.0487884	-0.746657	-0.580142	-1.05599	-1.05599	-1.05599	-1.05599	-1.05599	-1.05599
chr10:49538871_49539371	1.28542	1.28542	1.28542	1.28542	1.28542	1.28542	0.728837	0.459242	0.213469	-0.640105	-1.03548	-1.25847	-1.20816	-1.16556	-0.63438	-0.63438	-0.63438	-0.63438	-0.63438	-0.63438
chr2:56104929_56105429	1.30291	1.30291	1.30291	1.30291	1.30291	1.30291	1.00006	0.207216	-0.00515648	-0.394532	-0.666076	-0.777031	-1.11052	-1.11052	-0.826821	-0.826821	-0.826821	-0.826821	-0.826821	-0.826821
chr11:106077173_106077673	1.39159	1.39159	1.39159	1.39159	1.39159	1.39159	0.640743	-0.365106	-0.624524	-0.549883	-0.702837	-0.645843	-0.0677984	-1.01481	-0.836576	-0.836576	-0.836576	-0.836576	-0.836576	-0.836576
chr16:3500653_3501153	1.30515	1.30515	1.30515	1.30515	1.30515	1.30515	0.98993	0.475145	-0.464456	-0.668971	-0.970044	-0.476985	-0.55538	-0.776522	-0.897271	-0.897271	-0.897271	-0.897271	-0.897271	-0.897271
chr1:53517928_53518428	1.2267	1.2267	1.2267	1.2267	1.2267	1.2267	0.900774	0.744123	-0.195512	-0.31764	-0.0504549	-0.551624	-0.446207	-0.865658	-1.09633	-1.09633	-1.09633	-1.09633	-1.09633	-1.09633
chr13:57629771_57630271	1.13855	1.13855	1.13855	1.13855	1.13855	1.13855	1.07496	0.895823	0.517352	-0.0414535	-0.734627	-0.805996	-0.585878	-0.655868	-1.0826	-1.0826	-1.0826	-1.0826	-1.0826	-1.0826
chr22:37803152_37803652	1.18516	1.18516	1.18516	1.18516	1.18516	1.18516	0.882069	0.725408	0.051722	-0.0532184	-0.0532184	-0.269338	-0.509239	-0.928717	-1.15941	-1.15941	-1.15941	-1.15941	-1.15941	-1.15941
chr5:58582778_58583278	1.3533	1.3533	1.3533	1.3533	1.3533	1.3533	0.911115	-0.275414	-0.275414	-0.834426	-0.568169	-0.212373	-1.01595	-0.637795	-0.868566	-0.868566	-0.868566	-0.868566	-0.868566	-0.868566
chr8:134832101_134832601	1.26088	1.26088	1.26088	1.26088	1.26088	1.26088	0.699551	0.456934	-0.374636	0.224895	-0.234241	-0.10033	-0.931055	-1.15364	-1.02546	-1.02546	-1.02546	-1.02546	-1.02546	-1.02546
chr12:51026266_51026766	1.08095	1.08095	1.08095	1.08095	1.08095	1.08095	0.777708	0.944596	0.423817	0.375133	0.16812	-0.316686	-1.07303	-1.5	-1.03772	-1.03772	-1.03772	-1.03772	-1.03772	-1.03772
chr3:139343744_139344244	1.25341	1.25341	1.25341	1.25341	1.25341	1.25341	0.950087	0.267924	0.0552187	0.118284	-0.462086	-0.481155	-0.629119	-0.850632	-1.0815	-1.0815	-1.0815	-1.0815	-1.0815	-1.0815
chr17:1045494_1045994	1.20315	1.20315	1.20315	1.20315	1.20315	1.20315	0.342216	0.342216	0.63782	0.247609	0.014095	-0.202314	-0.628692	-0.849953	-1.18698	-1.18698	-1.18698	-1.18698	-1.18698	-1.18698
chr15:52568799_52569299	1.21801	1.21801	1.21801	1.21801	1.21801	1.21801	1.10525	0.970172	-0.308101	-0.339895	-0.791884	-1.13775	-0.809991	-0.754626	-0.873535	-0.873535	-0.873535	-0.873535	-0.873535	-0.873535
chr22:45671551_45672051	1.13641	1.13641	1.13641	1.13641	1.13641	1.13641	0.810009	0.539721	0.842691	0.365946	-0.352587	-1.02662	-0.547875	-0.850845	-1.09982	-1.09982	-1.09982	-1.09982	-1.09982	-1.09982
chr13:21459225_21459725	1.217	1.217	1.217	1.217	1.217	1.217	0.531391	0.680801	0.582513	0.290783	-0.670101	-1.08698	-0.906472	-1.12817	-0.932625	-0.932625	-0.932625	-0.932625	-0.932625	-0.932625
chr6:57046389_57046889	1.21148	1.21148	1.21148	1.21148	1.21148	1.21148	1.05379	0.616327	0.249984	-0.410542	-0.377522	-0.298863	-0.897741	-0.897741	-1.0511	-1.0511	-1.0511	-1.0511	-1.0511	-1.0511
chr12:116662457_116662957	1.40593	1.40593	1.40593	1.40593	1.40593	1.40593	0.594668	-0.200211	-0.717119	-1.08841	-0.611215	-0.997415	-0.669527	-0.574361	-0.695334	-0.695334	-0.695334	-0.695334	-0.695334	-0.695334
chr1:151327489_151327989	1.11924	1.11924	1.11924	1.11924	1.11924	1.11924	0.939231	0.939231	0.422284	0.217374	-0.183679	-0.440848	-1.03979	-1.08132	-1.08132	-1.08132	-1.08132	-1.08132	-1.08132	-1.08132
chr7:3175072_3175572	1.17868	1.17868	1.17868	1.17868	1.17868	1.17868	0.979144	0.676879	0.310478	0.105558	-0.433381	-0.433381	-0.667622	-0.889003	-1.12013	-1.12013	-1.12013	-1.12013	-1.12013	-1.12013
chr22:44498094_44498594	1.05256	1.05256	1.05256	1.05256	1.05256	1.05256	0.60166	0.515631	0.541567	0.940265	-0.219904	0.0469497	-0.200736	-1.0446	-1.24936	-1.24936	-1.24936	-1.24936	-1.24936	-1.24936
chr4:127781512_127782012	1.1843	1.1843	1.1843	1.1843	1.1843	1.1843	0.61744	0.78466	0.109292	-0.052064	0.101907	-0.214718	-0.449103	-0.767799	-1.20591	-1.20591	-1.20591	-1.20591	-1.20591	-1.20591
chr16:30610146_30610646	1.3375	1.3375	1.3375	1.3375	1.3375	1.3375	1.0107	0.00845136	-0.508898	-0.934081	-0.929265	-1.1531	-0.992981	-0.562705	-0.660519	-0.660519	-0.660519	-0.660519	-0.660519	-0.660519
chr1:31764174_31764674	1.13928	1.13928	1.13928	1.13928	1.13928	1.13928	0.835384	0.532889	0.532889	0.501055	-0.218375	-0.380624	-0.824405	-0.824405	-1.16501	-1.16501	-1.16501	-1.16501	-1.16501	-1.16501
chr1:26698013_26698513	1.27801	1.27801	1.27801	1.27801	1.27801	1.27801	1.04566	0.480983	-0.307872	-0.513014	-0.513014	-1.18551	-1.32145	-0.846326	-0.751255	-0.751255	-0.751255	-0.751255	-0.751255	-0.751255
chr1:147897271_147897771	1.34094	1.34094	1.34094	1.34094	1.34094	1.34094	0.237549	0.237549	0.237549	-0.0548032	-0.497984	-0.454852	-0.899116	-1.22306	-0.938074	-0.938074	-0.938074	-0.938074	-0.938074	-0.938074
chr2:181656818_181657318	1.23113	1.23113	1.23113	1.23113	1.23113	1.23113	0.926858	0.62399	-0.0523126	-0.261651	-0.495757	-0.0642585	-0.605562	-1.20757	-1.04175	-1.04175	-1.04175	-1.04175	-1.04175	-1.04175
chr19:50375923_50376423	1.14379	1.14379	1.14379	1.14379	1.14379	1.14379	0.816562	0.484755	0.271378	0.41027	0.0452157	-0.0171323	-0.739128	-1.22682	-1.15131	-1.15131	-1.15131	-1.15131	-1.15131	-1.15131
chr1:145425332_145425832	1.21322	1.21322	1.21322	1.21322	1.21322	1.21322	1.05518	0.258552	0.258552	-0.0419357	-0.383423	-0.383423	-0.383423	-0.804562	-1.14247	-1.14247	-1.14247	-1.14247	-1.14247	-1.14247
chr11:123268260_123268760	1.26873	1.26873	1.26873	1.26873	1.26873	1.26873	0.964362	0.167551	0.463997	-0.327199	-0.78046	-0.769834	-0.563519	-0.966751	-0.966751	-0.966751	-0.966751	-0.966751	-0.966751	-0.966751
chr7:50531917_50532417	1.313	1.313	1.313	1.313	1.313	1.313	0.625565	0.490095	0.115917	-0.275437	-0.580661	-0.91427	-0.847172	-1.06962	-0.903738	-0.903738	-0.903738	-0.903738	-0.903738	-0.903738
chr1:247104192_247104692	1.23266	1.23266	1.23266	1.23266	1.23266	1.23266	0.962653	0.900159	-0.334884	-0.44028	-1.41965	-1.26497	-0.833751	-0.790917	-0.695716	-0.695716	-0.695716	-0.695716	-0.695716	-0.695716
chr18:9475158_9475658	1.10586	1.10586	1.10586	1.10586	1.10586	1.10586	0.198303	-0.993958	-1.5	-1.5	-1.41291	-0.884054	-0.271202	0.058512	0.0998302	0.0998302	0.0998302	0.0998302	0.0998302	0.0998302
chr9:36487592_36488092	1.29187	1.29187	1.29187	1.29187	1.29187	1.29187	0.847517	0.484475	-0.248839	-0.656653	-0.559155	-0.258003	-0.978105	-0.33728	-1.00753	-1.00753	-1.00753	-1.00753	-1.00753	-1.00753
chr10:27241913_27242413	1.31164	1.31164	1.31164	1.31164	1.31164	1.31164	0.866901	0.129956	-0.547844	-0.0363962	-0.231307	-0.830891	-0.651708	-0.452364	-1.01936	-1.01936	-1.01936	-1.01936	-1.01936	-1.01936
chr13:44396617_44397117	1.20194	1.20194	1.20194	1.20194	1.20194	1.20194	1.00149	0.843825	0.0273986	-0.182471	-0.33458	-0.473061	-0.812417	-0.937824	-1.05733	-1.05733	-1.05733	-1.05733	-1.05733	-1.05733
chr12:95146710_95147210	1.311	1.311	1.311	1.311	1.311	1.311	0.568532	0.324446	0.350499	-0.368592	-0.812977	-0.385964	-0.713287	-0.843452	-0.997532	-0.997532	-0.997532	-0.997532	-0.997532	-0.997532
chr19:36032649_36033149	1.02094	1.02094	1.02094	1.02094	1.02094	1.02094	0.84009	0.682406	0.979541	0.500353	-0.167879	-0.282555	-0.418979	-0.641767	-1.26947	-1.26947	-1.26947	-1.26947	-1.26947	-1.26947
chr12:6493079_6493579	1.23539	1.23539	1.23539	1.23539	1.23539	1.23539	0.881428	0.891642	-0.0546707	-0.394782	-1.36089	-1.21153	-0.934902	-0.64271	-0.764321	-0.764321	-0.764321	-0.764321	-0.764321	-0.764321
chr11:44728468_44728968	1.18615	1.18615	1.18615	1.18615	1.18615	1.18615	0.624826	0.42567	0.232873	0.0543711	0.324367	-0.271957	-0.300513	-0.989448	-1.20285	-1.20285	-1.20285	-1.20285	-1.20285	-1.20285
chr6:158999590_159000090	1.28385	1.28385	1.28385	1.28385	1.28385	1.28385	0.929783	0.489858	-0.216561	-0.12646	-0.625332	-0.804034	-0.96776	-1.26943	-0.852198	-0.852198	-0.852198	-0.852198	-0.852198	-0.852198
chr12:19129324_19129824	1.17342	1.17342	1.17342	1.17342	1.17342	1.17342	0.611945	-0.395302	-1.05835	-1.5	-1.5	-1.5	-0.616907	-0.317187	-0.0311	-0.0311	-0.0311	-0.0311	-0.0311	-0.0311
chr16:57486244_57486744	1.34691	1.34691	1.34691	1.34691	1.34691	1.34691	0.576894	0.356519	-0.0120529	-0.57524	-0.57524	-0.760692	-1.09392	-1.11693	-0.813463	-0.813463	-0.813463	-0.813463	-0.813463	-0.813463
chr17:38789068_38789568	1.32467	1.32467	1.32467	1.32467	1.32467	1.32467	0.414706	-0.0254385	0.128934	-0.033284	-0.0156142	-0.365525	-0.811611	-1.03431	-1.03431	-1.03431	-1.03431	-1.03431	-1.03431	-1.03431
chr16:77434992_77435492	1.14454	1.14454	1.14454	1.14454	1.14454	1.14454	0.926441	0.0199524	0.804507	0.73779	-0.513468	-0.772225	-1.20145	-0.781937	-1.01448	-1.01448	-1.01448	-1.01448	-1.01448	-1.01448
chr4:37977639_37978139	1.18919	1.18919	1.18919	1.18919	1.18919	1.18919	0.871382	1.03654	0.0892335	0.0892335	-0.634112	-0.851983	-0.867073	-0.781856	-1.01442	-1.01442	-1.01442	-1.01442	-1.01442	-1.01442
chr4:1289569_1290069	1.19377	1.19377	1.19377	1.19377	1.19377	1.19377	0.737935	0.663988	0.519875	-0.0760316	-0.409465	-0.504811	-0.325268	-1.28945	-1.0799	-1.0799	-1.0799	-1.0799	-1.0799	-1.0799
chr9:13279439_13279939	1.22657	1.22657	1.22657	1.22657	1.22657	1.22657	0.897966	0.498524	0.459988	-0.0199805	-1.13441	-1.09109	-1.23425	-0.884455	-0.808624	-0.808624	-0.808624	-0.808624	-0.808624	-0.808624
chr19:49664298_49664798	1.18811	1.18811	1.18811	1.18811	1.18811	1.18811	1.00695	0.566625	0.318531	-0.161483	-0.257867	-0.238593	-0.675963	-0.898753	-1.13135	-1.13135	-1.13135	-1.13135	-1.13135	-1.13135
chr22:42803344_42803844	0.932238	0.932238	0.932238	0.932238	0.932238	0.932238	0.626624	0.46866	0.773723	0.80073	0.80073	0.192702	-0.53245	-0.955416	-1.29479	-1.29479	-1.29479	-1.29479	-1.29479	-1.29479
chr1:185156839_185157339	1.08214	1.08214	1.08214	1.08214	1.08214	1.08214	0.633355	0.791814	0.389796	0.176389	0.295182	0.121457	-0.567035	-1.5	-1.09085	-1.09085	-1.09085	-1.09085	-1.09085	-1.09085
chr6:97215299_97215799	1.22283	1.22283	1.22283	1.22283	1.22283	1.22283	0.652563	0.212133	0.509852	0.256375	-0.0866584	-0.500866	-0.637557	-1.0606	-1.1137	-1.1137	-1.1137	-1.1137	-1.1137	-1.1137
chr11:134032340_134032840	1.2961	1.2961	1.2961	1.2961	1.2961	1.2961	0.850251	0.450631	0.081768	-0.311278	-0.766536	-1.05995	-0.992557	-0.907296	-0.853602	-0.853602	-0.853602	-0.853602	-0.853602	-0.853602
chr19:9407027_9407527	1.11802	1.11802	1.11802	1.11802	1.11802	1.11802	1.11802	0.813591	0.444569	0.190955	-0.254573	-0.692166	-0.692166	-1.11544	-1.08682	-1.08682	-1.08682	-1.08682	-1.08682	-1.08682
chr9:83956475_83956975	1.18342	1.18342	1.18342	1.18342	1.18342	1.18342	0.740652	0.436138	0.436138	0.134042	0.0128458	-0.150486	-0.892669	-0.82284	-1.16572	-1.16572	-1.16572	-1.16572	-1.16572	-1.16572
chr19:36140986_36141486	1.34243	1.34243	1.34243	1.34243	1.34243	1.34243	0.431076	-0.00974121	-0.378889	-0.173414	-0.211289	-0.504924	-0.437484	-0.14461	-1.10422	-1.10422	-1.10422	-1.10422	-1.10422	-1.10422
chr16:81494140_81494640	1.13379	1.13379	1.13379	1.13379	1.13379	1.13379	0.873481	0.187414	-0.3437	0.333935	0.29603	0.29603	-0.120109	-0.810996	-1.25247	-1.25247	-1.25247	-1.25247	-1.25247	-1.25247
chr5:1799599_1800099	1.36088	1.36088	1.36088	1.36088	1.36088	1.36088	0.589006	0.389272	-0.249844	-0.724569	-1.09192	-0.979289	-0.746246	-0.810623	-0.756843	-0.756843	-0.756843	-0.756843	-0.756843	-0.756843
chr12:49828230_49828730	1.26612	1.26612	1.26612	1.26612	1.26612	1.26612	0.415934	0.251664	0.277818	0.0257833	-0.169953	-0.447297	-0.509062	-0.306265	-1.18923	-1.18923	-1.18923	-1.18923	-1.18923	-1.18923
chr14:72926075_72926575	1.33748	1.33748	1.33748	1.33748	1.33748	1.33748	0.709914	0.375899	-0.145575	-0.520148	-0.887631	-0.910296	-1.23897	-0.77194	-0.772693	-0.772693	-0.772693	-0.772693	-0.772693	-0.772693
chr16:66830715_66831215	1.05471	1.05471	1.05471	1.05471	1.05471	1.05471	0.964147	0.563629	0.707684	0.544978	0.09864	-0.316544	-0.920897	-0.677112	-1.21546	-1.21546	-1.21546	-1.21546	-1.21546	-1.21546
chr2:222656171_222656671	1.22843	1.22843	1.22843	1.22843	1.22843	1.22843	0.88077	0.48022	0.103549	0.0366361	-0.368072	-1.04687	-1.5	-1.29866	-0.761025	-0.761025	-0.761025	-0.761025	-0.761025	-0.761025
chr11:126102484_126102984	0.895198	0.895198	0.895198	0.895198	0.895198	0.895198	0.895198	0.895198	0.525146	0.525146	0.525146	0.412784	-0.314923	-0.721237	-1.35227	-1.35227	-1.35227	-1.35227	-1.35227	-1.35227
chr1:182633613_182634113	1.29963	1.29963	1.29963	1.29963	1.29963	1.29963	1.21607	0.015718	-0.217597	-0.643113	-0.817643	-1.11204	-1.07615	-0.521914	-0.773524	-0.773524	-0.773524	-0.773524	-0.773524	-0.773524
chr2:241868018_241868518	1.1904	1.1904	1.1904	1.1904	1.1904	1.1904	0.737187	0.737187	0.204899	0.0419452	-0.0890495	-0.366959	-0.504182	-0.928871	-1.16243	-1.16243	-1.16243	-1.16243	-1.16243	-1.16243
chrX:53048232_53048732	1.20112	1.20112	1.20112	1.20112	1.20112	1.20112	0.999411	0.693851	0.0115393	-0.167932	-0.443173	-0.17904	-0.517069	-0.826876	-1.12958	-1.12958	-1.12958	-1.12958	-1.12958	-1.12958
chrX:15335360_15335860	1.36775	1.36775	1.36775	1.36775	1.36775	1.36775	0.113884	-0.797059	-0.608717	-1.00346	-1.3718	-1.15532	-1.40261	-0.34837	-0.272177	-0.272177	-0.272177	-0.272177	-0.272177	-0.272177
chr2:95159544_95160044	1.12944	1.12944	1.12944	1.12944	1.12944	1.12944	0.799091	1.12391	0.301741	-0.128066	-0.0946573	-0.157601	-0.971757	-1.09276	-1.09276	-1.09276	-1.09276	-1.09276	-1.09276	-1.09276
chr5:1231346_1231846	1.12249	1.12249	1.12249	1.12249	1.12249	1.12249	0.440048	0.0307179	0.0307179	0.550488	0.583897	0.323721	-0.282226	-0.689215	-1.28719	-1.28719	-1.28719	-1.28719	-1.28719	-1.28719
chr3:43769592_43770092	1.09243	1.09243	1.09243	1.09243	1.09243	1.09243	0.910238	0.792387	0.576868	0.0102267	0.0436512	-0.232068	-0.680877	-0.521616	-1.24223	-1.24223	-1.24223	-1.24223	-1.24223	-1.24223
chr11:72793542_72794042	0.95328	0.95328	0.95328	0.95328	0.95328	0.95328	0.818219	0.681366	0.609837	0.0428989	0.624336	0.345847	0.00724061	-0.72189	-1.35459	-1.35459	-1.35459	-1.35459	-1.35459	-1.35459
chr2:233999134_233999634	1.22697	1.22697	1.22697	1.22697	1.22697	1.22697	0.653037	0.822341	0.138556	-0.157075	-0.254102	-0.366811	-0.604117	-1.21279	-1.06347	-1.06347	-1.06347	-1.06347	-1.06347	-1.06347
chr10:44064089_44064589	1.28538	1.28538	1.28538	1.28538	1.28538	1.28538	0.60171	0.60171	0.230378	-0.165299	-0.510665	-0.730106	-0.9675	-0.9675	-0.9675	-0.9675	-0.9675	-0.9675	-0.9675	-0.9675
chr8:13133175_13133675	1.34009	1.34009	1.34009	1.34009	1.34009	1.34009	0.880978	-0.125271	-0.509575	-0.805324	-0.534009	-0.80818	-0.131632	-0.262952	-0.957433	-0.957433	-0.957433	-0.957433	-0.957433	-0.957433
chr1:67684931_67685431	1.2256	1.2256	1.2256	1.2256	1.2256	1.2256	1.22502	0.444832	-0.0752243	-0.688829	-0.809557	-0.962326	-0.327678	-0.105689	-1.00902	-1.00902	-1.00902	-1.00902	-1.00902	-1.00902
chr19:42176847_42177347	1.08774	1.08774	1.08774	1.08774	1.08774	1.08774	0.413965	0.433054	0.645145	0.563647	0.623442	-0.256456	-0.835465	-0.695478	-1.23639	-1.23639	-1.23639	-1.23639	-1.23639	-1.23639
chr11:64601817_64602317	1.20945	1.20945	1.20945	1.20945	1.20945	1.20945	0.514026	0.53312	0.16158	0.433396	-0.0151732	-0.620615	-0.411887	-0.828502	-1.17044	-1.17044	-1.17044	-1.17044	-1.17044	-1.17044
chr11:130916237_130916737	1.31717	1.31717	1.31717	1.31717	1.31717	1.31717	0.750966	0.114196	-0.257403	-0.437459	-0.783075	-1.10836	-1.5	-1.10475	-0.570149	-0.570149	-0.570149	-0.570149	-0.570149	-0.570149
chr2:48314245_48314745	1.13217	1.13217	1.13217	1.13217	1.13217	1.13217	1.02212	0.0973887	-1.02906	-1.44635	-1.5	-1.5	-1.3166	-0.696254	-0.0505339	-0.0505339	-0.0505339	-0.0505339	-0.0505339	-0.0505339
chr14:23306485_23306985	1.34783	1.34783	1.34783	1.34783	1.34783	1.34783	0.690666	0.128538	-0.671043	-0.354486	-0.724148	-1.40761	-1.30436	-0.598147	-0.641064	-0.641064	-0.641064	-0.641064	-0.641064	-0.641064
chr19:34254864_34255364	1.20859	1.20859	1.20859	1.20859	1.20859	1.20859	1.04845	0.889086	0.0638606	-0.332561	-0.510959	-0.864142	-0.655139	-0.880763	-1.00156	-1.00156	-1.00156	-1.00156	-1.00156	-1.00156
chr12:48027201_48027701	1.26612	1.26612	1.26612	1.26612	1.26612	1.26612	0.819841	0.0125909	0.312921	0.0572202	-0.180027	-0.501343	-0.7392	-1.0541	-1.0541	-1.0541	-1.0541	-1.0541	-1.0541	-1.0541
chr17:5191657_5192157	1.2444	1.2444	1.2444	1.2444	1.2444	1.2444	0.451253	0.85862	-0.144617	0.385635	-0.483882	-0.475057	-1.01081	-1.14241	-0.984186	-0.984186	-0.984186	-0.984186	-0.984186	-0.984186
chr5:168916149_168916649	1.30051	1.30051	1.30051	1.30051	1.30051	1.30051	0.992033	0.184441	-0.187774	-0.395945	-0.362396	-0.425604	-0.663563	-0.99204	-0.99204	-0.99204	-0.99204	-0.99204	-0.99204	-0.99204
chr1:63774657_63775157	1.34015	1.34015	1.34015	1.34015	1.34015	1.34015	0.643323	0.198754	0.198754	-0.450918	-0.900391	-0.743606	-0.758844	-0.688417	-0.923256	-0.923256	-0.923256	-0.923256	-0.923256	-0.923256
chr1:226870373_226870873	1.32956	1.32956	1.32956	1.32956	1.32956	1.32956	0.336114	-0.0672292	-0.0672292	-0.275449	-0.275449	-0.517036	-0.0248234	-0.249769	-1.13941	-1.13941	-1.13941	-1.13941	-1.13941	-1.13941
chr15:34969578_34970078	1.227	1.227	1.227	1.227	1.227	1.227	0.771165	1.09752	0.140643	-0.733707	-0.700141	-0.689366	-0.932324	-1.15803	-0.859628	-0.859628	-0.859628	-0.859628	-0.859628	-0.859628
chr14:23352675_23353175	1.41613	1.41613	1.41613	1.41613	1.41613	1.41613	0.35829	-0.612283	-0.549201	-0.24524	-0.301017	-0.597411	-0.317532	-0.956033	-0.879396	-0.879396	-0.879396	-0.879396	-0.879396	-0.879396
chr16:1538832_1539332	1.27769	1.27769	1.27769	1.27769	1.27769	1.27769	1.11726	0.00120864	-0.27542	-0.160077	-0.0787793	-0.612052	-0.858872	-0.634644	-1.02746	-1.02746	-1.02746	-1.02746	-1.02746	-1.02746
chr1:156659955_156660455	1.31123	1.31123	1.31123	1.31123	1.31123	1.31123	0.85496	0.216221	0.242605	-0.491559	-0.798455	-0.680573	-0.831268	-0.889289	-0.915001	-0.915001	-0.915001	-0.915001	-0.915001	-0.915001
chr17:43816579_43817079	1.17607	1.17607	1.17607	1.17607	1.17607	1.17607	1.11123	0.194196	-0.000975196	0.164847	-0.032706	-0.105485	-0.351339	-0.962862	-1.17889	-1.17889	-1.17889	-1.17889	-1.17889	-1.17889
chr1:160210950_160211450	1.04732	1.04732	1.04732	1.04732	1.04732	1.04732	0.864093	1.02856	0.201326	0.408909	0.171102	-0.222035	-0.2743	-1.35317	-1.18473	-1.18473	-1.18473	-1.18473	-1.18473	-1.18473
chr5:180208995_180209495	1.31603	1.31603	1.31603	1.31603	1.31603	1.31603	0.862168	-0.0550005	-0.0550005	0.060428	-0.441548	-0.703354	-0.834286	-0.96137	-0.96137	-0.96137	-0.96137	-0.96137	-0.96137	-0.96137
chr8:103414988_103415488	1.28448	1.28448	1.28448	1.28448	1.28448	1.28448	0.933733	0.624181	-0.223634	-0.363058	-0.617832	-0.845534	-0.69992	-0.850409	-0.944071	-0.944071	-0.944071	-0.944071	-0.944071	-0.944071
chr11:103109149_103109649	1.22971	1.22971	1.22971	1.22971	1.22971	1.22971	0.993367	0.547836	0.35258	-0.217518	-0.667963	-0.690843	-0.719763	-0.743055	-1.03881	-1.03881	-1.03881	-1.03881	-1.03881	-1.03881
chr14:76956251_76956751	1.24866	1.24866	1.24866	1.24866	1.24866	1.24866	1.06533	0.66106	-0.297756	-0.948938	-0.792225	-0.279206	-0.256855	-0.868741	-0.96244	-0.96244	-0.96244	-0.96244	-0.96244	-0.96244
chr22:19710795_19711295	1.03652	1.03652	1.03652	1.03652	1.03652	1.03652	1.03652	0.728471	0.728471	0.330585	0.092478	-0.326876	-0.569023	-0.794636	-1.24085	-1.24085	-1.24085	-1.24085	-1.24085	-1.24085
chrX:70454263_70454763	1.34428	1.34428	1.34428	1.34428	1.34428	1.34428	0.775235	0.249485	-0.287416	-0.355006	-0.702356	-0.545076	-0.788729	-0.915975	-0.915975	-0.915975	-0.915975	-0.915975	-0.915975	-0.915975
chr7:78019658_78020158	1.42037	1.42037	1.42037	1.42037	1.42037	1.42037	0.498235	-0.620225	-1.00678	-0.584378	-0.659931	-1.10285	-0.878033	-0.549376	-0.603148	-0.603148	-0.603148	-0.603148	-0.603148	-0.603148
chr15:73636332_73636832	1.15321	1.15321	1.15321	1.15321	1.15321	1.15321	0.704785	0.396382	0.396382	0.187301	0.187301	-0.0336226	-0.584817	-0.700944	-1.24533	-1.24533	-1.24533	-1.24533	-1.24533	-1.24533
chr10:90857569_90858069	1.31262	1.31262	1.31262	1.31262	1.31262	1.31262	1.15168	-0.149958	-0.345643	-0.998152	-0.726017	-0.221851	-0.665366	-0.462788	-0.909606	-0.909606	-0.909606	-0.909606	-0.909606	-0.909606
chr17:35763911_35764411	1.19335	1.19335	1.19335	1.19335	1.19335	1.19335	1.07822	0.594595	0.197823	0.140613	-0.840298	-1.20939	-1.08823	-1.39152	-0.773651	-0.773651	-0.773651	-0.773651	-0.773651	-0.773651
chr2:30231227_30231727	1.09312	1.09312	1.09312	1.09312	1.09312	1.09312	1.05836	0.611801	0.913661	0.108016	-0.071304	-0.760322	-1.109	-1.23641	-1.01225	-1.01225	-1.01225	-1.01225	-1.01225	-1.01225
chr18:48889352_48889852	1.40944	1.40944	1.40944	1.40944	1.40944	1.40944	0.285241	-0.355644	-0.551375	-0.949897	-0.676638	-0.350626	-0.0431974	-0.363825	-0.908448	-0.908448	-0.908448	-0.908448	-0.908448	-0.908448
chr12:38316439_38316939	1.20807	1.20807	1.20807	1.20807	1.20807	1.20807	1.20807	0.615947	0.223523	-0.507418	-1.3481	-0.984233	-0.649376	-1.07852	-0.788052	-0.788052	-0.788052	-0.788052	-0.788052	-0.788052
chr4:185894374_185894874	1.2941	1.2941	1.2941	1.2941	1.2941	1.2941	0.715121	0.267958	-0.00996939	-0.467585	-0.195053	-0.335088	-0.312658	-0.926687	-1.08344	-1.08344	-1.08344	-1.08344	-1.08344	-1.08344
chr2:218261614_218262114	1.30098	1.30098	1.30098	1.30098	1.30098	1.30098	0.600043	0.291109	0.397415	-0.0900857	-0.76991	-0.909953	-1.04141	-1.17384	-0.851537	-0.851537	-0.851537	-0.851537	-0.851537	-0.851537
chr3:190120752_190121252	1.26699	1.26699	1.26699	1.26699	1.26699	1.26699	0.687955	0.241175	0.241175	-0.0570864	-0.180046	-0.271322	-0.724565	-1.22202	-1.05287	-1.05287	-1.05287	-1.05287	-1.05287	-1.05287
chr12:109996170_109996670	1.05729	1.05729	1.05729	1.05729	1.05729	1.05729	0.482547	1.03093	0.492379	0.681072	0.130059	-0.290647	-1.04385	-0.570485	-1.20929	-1.20929	-1.20929	-1.20929	-1.20929	-1.20929
chr7:128267274_128267774	1.32059	1.32059	1.32059	1.32059	1.32059	1.32059	0.867703	0.169333	-0.661786	-0.387668	-0.00389811	-0.606006	-0.955367	-0.568062	-0.962962	-0.962962	-0.962962	-0.962962	-0.962962	-0.962962
chr15:50424034_50424534	1.27835	1.27835	1.27835	1.27835	1.27835	1.27835	0.815099	0.248577	0.551032	-0.622546	-1.01353	-0.688935	-1.11099	-1.19928	-0.774925	-0.774925	-0.774925	-0.774925	-0.774925	-0.774925
chr18:77300570_77301070	1.16497	1.16497	1.16497	1.16497	1.16497	1.16497	1.13014	0.821005	0.130714	0.00556788	-0.174123	-0.776292	-1.01586	-1.01586	-1.01586	-1.01586	-1.01586	-1.01586	-1.01586	-1.01586
chr10:58385067_58385567	1.34104	1.34104	1.34104	1.34104	1.34104	1.34104	0.765956	0.188908	-0.00725753	-0.739548	-0.76211	-0.435375	-0.683599	-0.910462	-0.910462	-0.910462	-0.910462	-0.910462	-0.910462	-0.910462
chr16:970780_971280	1.23935	1.23935	1.23935	1.23935	1.23935	1.23935	0.584207	0.740545	-0.374317	0.15683	-0.0992067	-0.377918	-0.409685	-1.26532	-1.06521	-1.06521	-1.06521	-1.06521	-1.06521	-1.06521
chr6:165985509_165986009	1.24784	1.24784	1.24784	1.24784	1.24784	1.24784	1.24784	0.54898	-0.141725	-0.448589	-0.797321	-0.797321	-0.826386	-0.942857	-0.888278	-0.888278	-0.888278	-0.888278	-0.888278	-0.888278
chr6:131628112_131628612	1.34428	1.34428	1.34428	1.34428	1.34428	1.34428	0.526925	0.0789119	-0.117432	-0.517202	-0.483386	-0.483386	-0.20541	-0.432296	-1.07207	-1.07207	-1.07207	-1.07207	-1.07207	-1.07207
chr7:69597956_69598456	1.28433	1.28433	1.28433	1.28433	1.28433	1.28433	0.527472	0.156944	-0.141931	-0.17015	-0.142266	-1.03701	-1.5	-1.49859	-0.599446	-0.599446	-0.599446	-0.599446	-0.599446	-0.599446
chr4:183504401_183504901	1.25228	1.25228	1.25228	1.25228	1.25228	1.25228	0.788364	0.0280098	-0.0972087	-0.147134	0.203562	-0.203228	-0.298647	-0.816489	-1.16181	-1.16181	-1.16181	-1.16181	-1.16181	-1.16181
chr12:104985994_104986494	1.29238	1.29238	1.29238	1.29238	1.29238	1.29238	0.535305	0.554593	0.179279	-0.39421	-0.2236	-0.424295	-1.05416	-0.967405	-0.993293	-0.993293	-0.993293	-0.993293	-0.993293	-0.993293
chr10:47409315_47409815	1.06717	1.06717	1.06717	1.06717	1.06717	1.06717	0.845054	0.596093	1.01965	0.210832	0.0780078	-0.612148	-0.401237	-1.08195	-1.17622	-1.17622	-1.17622	-1.17622	-1.17622	-1.17622
chr9:8858593_8859093	1.30471	1.30471	1.30471	1.30471	1.30471	1.30471	0.850275	0.401312	-0.275182	-0.303458	-0.483745	-1.17305	-1.17305	-1.17305	-0.749714	-0.749714	-0.749714	-0.749714	-0.749714	-0.749714
chr3:134485760_134486260	1.33138	1.33138	1.33138	1.33138	1.33138	1.33138	-0.0593609	-0.0197844	0.393405	-0.0426003	-0.416456	-0.173935	-0.254543	-0.795903	-1.10319	-1.10319	-1.10319	-1.10319	-1.10319	-1.10319
chr11:133951987_133952487	1.32522	1.32522	1.32522	1.32522	1.32522	1.32522	0.553451	-0.666764	-0.226845	-0.0908485	-0.147166	-0.309558	0.109109	-0.639312	-1.08889	-1.08889	-1.08889	-1.08889	-1.08889	-1.08889
chr15:72272418_72272918	1.25518	1.25518	1.25518	1.25518	1.25518	1.25518	0.389354	0.438843	0.578654	-0.233946	-0.106677	-0.449527	-0.538012	-0.906867	-1.11715	-1.11715	-1.11715	-1.11715	-1.11715	-1.11715
chr8:141519028_141519528	1.36741	1.36741	1.36741	1.36741	1.36741	1.36741	0.438255	0.299436	-0.241623	-0.367314	-0.367314	-0.692343	-0.936403	-1.1638	-0.862225	-0.862225	-0.862225	-0.862225	-0.862225	-0.862225
chr5:115179330_115179830	1.25397	1.25397	1.25397	1.25397	1.25397	1.25397	0.79894	0.48837	0.111903	-0.196201	-0.43626	-0.392025	-0.53155	-0.582536	-1.13075	-1.13075	-1.13075	-1.13075	-1.13075	-1.13075
chr7:132138717_132139217	1.11259	1.11259	1.11259	1.11259	1.11259	1.11259	0.534941	1.01157	0.635073	0.233892	-0.220663	-0.443156	-0.443156	-0.670638	-1.2189	-1.2189	-1.2189	-1.2189	-1.2189	-1.2189
chr1:222617613_222618113	1.39495	1.39495	1.39495	1.39495	1.39495	1.39495	0.205921	-0.324391	-0.851851	-0.497827	-1.5	-1.10655	-0.965342	-0.716932	-0.424472	-0.424472	-0.424472	-0.424472	-0.424472	-0.424472
chr17:78599413_78599913	1.05114	1.05114	1.05114	1.05114	1.05114	1.05114	0.888972	0.888972	0.499056	0.499056	-0.0983953	-0.0983953	-0.554383	-0.986537	-1.2242	-1.2242	-1.2242	-1.2242	-1.2242	-1.2242
chr19:51338919_51339419	1.2677	1.2677	1.2677	1.2677	1.2677	1.2677	0.809238	0.809238	-0.158859	-0.266972	-0.821158	-0.738058	-0.983866	-0.507771	-0.957997	-0.957997	-0.957997	-0.957997	-0.957997	-0.957997
chr10:131900706_131901206	1.23325	1.23325	1.23325	1.23325	1.23325	1.23325	0.31623	0.712304	-0.371702	0.257596	0.318261	-0.523223	-0.434557	-0.826239	-1.14136	-1.14136	-1.14136	-1.14136	-1.14136	-1.14136
chr5:138649642_138650142	1.36572	1.36572	1.36572	1.36572	1.36572	1.36572	0.787408	-0.0304213	-0.407353	-0.440077	-0.406103	-1.09903	-0.88727	-0.899665	-0.801967	-0.801967	-0.801967	-0.801967	-0.801967	-0.801967
chr4:107990059_107990559	1.22766	1.22766	1.22766	1.22766	1.22766	1.22766	0.915187	0.753678	-0.2151	-0.150132	-0.150132	-0.492604	-0.624955	-1.05742	-1.05742	-1.05742	-1.05742	-1.05742	-1.05742	-1.05742
chr12:48001382_48001882	1.2501	1.2501	1.2501	1.2501	1.2501	1.2501	1.2501	0.546443	-0.149003	-0.80781	-1.01688	-0.825148	-0.613059	-0.636627	-0.874769	-0.874769	-0.874769	-0.874769	-0.874769	-0.874769
chr17:63621768_63622268	1.19884	1.19884	1.19884	1.19884	1.19884	1.19884	0.822367	0.203655	0.737309	0.126918	-0.0867429	-0.851474	-1.23467	-0.855223	-1.0092	-1.0092	-1.0092	-1.0092	-1.0092	-1.0092
chr6:169751463_169751963	1.13528	1.13528	1.13528	1.13528	1.13528	1.13528	0.822281	0.435067	0.96874	-0.165416	-0.0652577	-0.276355	-0.998051	-1.5	-0.998478	-0.998478	-0.998478	-0.998478	-0.998478	-0.998478
chr3:113514934_113515434	1.31142	1.31142	1.31142	1.31142	1.31142	1.31142	0.998206	0.178231	-0.199691	-0.325905	-0.449988	-0.793269	-0.822563	-0.717597	-0.955989	-0.955989	-0.955989	-0.955989	-0.955989	-0.955989
chr5:107402830_107403330	1.11414	1.11414	1.11414	1.11414	1.11414	1.11414	1.0484	0.638783	0.440913	-0.18371	0.0914607	-0.0987787	-0.538994	-0.767436	-1.21924	-1.21924	-1.21924	-1.21924	-1.21924	-1.21924
chr22:17369177_17369677	1.37763	1.37763	1.37763	1.37763	1.37763	1.37763	0.709289	0.0613626	-0.751826	-1.00695	-0.924478	-1.02226	-0.91726	-0.582282	-0.638566	-0.638566	-0.638566	-0.638566	-0.638566	-0.638566
chr19:2785184_2785684	1.13752	1.13752	1.13752	1.13752	1.13752	1.13752	1.11422	0.625153	0.370729	-0.207081	0.0718276	-0.308116	-0.641932	-0.816564	-1.17223	-1.17223	-1.17223	-1.17223	-1.17223	-1.17223
chr11:64071720_64072220	1.18295	1.18295	1.18295	1.18295	1.18295	1.18295	0.856875	0.736661	0.610426	0.0324272	-0.817526	-0.734095	-0.975922	-0.584919	-1.03694	-1.03694	-1.03694	-1.03694	-1.03694	-1.03694
chr17:63431893_63432393	1.21428	1.21428	1.21428	1.21428	1.21428	1.21428	0.877105	0.737565	0.193697	-0.0178836	-0.369741	-0.593306	-0.835162	-0.835162	-1.0738	-1.0738	-1.0738	-1.0738	-1.0738	-1.0738
chr1:178005407_178005907	1.40957	1.40957	1.40957	1.40957	1.40957	1.40957	0.520052	-0.0624352	-0.447911	-0.659522	-0.900791	-0.900791	-0.93012	-0.725131	-0.725131	-0.725131	-0.725131	-0.725131	-0.725131	-0.725131
chr7:5248167_5248667	1.16464	1.16464	1.16464	1.16464	1.16464	1.16464	0.875901	0.67128	0.863713	-0.293982	-0.761139	-1.27987	-1.17476	-1.31306	-0.762653	-0.762653	-0.762653	-0.762653	-0.762653	-0.762653
chr16:81502341_81502841	0.976585	0.976585	0.976585	0.976585	0.976585	0.976585	0.662851	0.436509	0.0579589	0.175109	0.668192	0.786188	0.0638115	-0.465805	-1.37405	-1.37405	-1.37405	-1.37405	-1.37405	-1.37405
chr9:34510344_34510844	1.06727	1.06727	1.06727	1.06727	1.06727	1.06727	0.904325	0.321514	0.627104	0.627104	0.170043	-0.0536772	-0.611851	-1.19831	-1.19831	-1.19831	-1.19831	-1.19831	-1.19831	-1.19831
chr7:45000196_45000696	0.977523	0.977523	0.977523	0.977523	0.977523	0.977523	0.94233	0.95283	0.851244	0.415973	0.0803801	-0.263505	-0.410501	-0.826186	-1.26795	-1.26795	-1.26795	-1.26795	-1.26795	-1.26795
chr13:41310957_41311457	1.29434	1.29434	1.29434	1.29434	1.29434	1.29434	0.717468	0.227811	0.227811	-0.0820361	-0.638914	-0.462606	-0.70812	-0.70812	-1.05655	-1.05655	-1.05655	-1.05655	-1.05655	-1.05655
chr4:79296835_79297335	1.07017	1.07017	1.07017	1.07017	1.07017	1.07017	0.907158	0.324115	0.629827	0.503345	0.0461025	-0.0718837	-0.31748	-0.733316	-1.28482	-1.28482	-1.28482	-1.28482	-1.28482	-1.28482
chr9:101275041_101275541	1.33416	1.33416	1.33416	1.33416	1.33416	1.33416	0.868051	-0.0633642	0.0441616	-0.616842	-0.34009	-0.671661	-0.701022	-0.743954	-0.96337	-0.96337	-0.96337	-0.96337	-0.96337	-0.96337
chr3:8963236_8963736	1.37739	1.37739	1.37739	1.37739	1.37739	1.37739	0.58593	-0.120176	-0.0933613	-0.309374	-0.819222	-0.735665	-0.424262	-0.840222	-0.917997	-0.917997	-0.917997	-0.917997	-0.917997	-0.917997
chr18:8279834_8280334	1.22688	1.22688	1.22688	1.22688	1.22688	1.22688	0.912886	0.32962	0.131341	0.130364	-0.246345	-0.246345	-0.900317	-1.33489	-1.02294	-1.02294	-1.02294	-1.02294	-1.02294	-1.02294
chr1:28914167_28914667	1.24129	1.24129	1.24129	1.24129	1.24129	1.24129	0.678521	0.226373	-0.763568	-1.06541	-0.982744	-1.5	-1.5	-0.768878	-0.237805	-0.237805	-0.237805	-0.237805	-0.237805	-0.237805
chr3:62873668_62874168	1.29373	1.29373	1.29373	1.29373	1.29373	1.29373	1.10745	0.0710573	-0.627401	-0.318102	-0.151945	-0.49635	-0.538213	-0.767695	-1.00687	-1.00687	-1.00687	-1.00687	-1.00687	-1.00687
chr3:129577332_129577832	1.43533	1.43533	1.43533	1.43533	1.43533	1.43533	0.110181	0.0456488	-0.489492	-0.839751	-0.461444	-0.60328	-0.850725	-0.652926	-0.811695	-0.811695	-0.811695	-0.811695	-0.811695	-0.811695
chr19:8002322_8002822	1.169	1.169	1.169	1.169	1.169	1.169	0.830774	0.517709	0.444549	0.232307	-0.12065	-0.344913	-0.587524	-1.11846	-1.14464	-1.14464	-1.14464	-1.14464	-1.14464	-1.14464
chrX:129932037_129932537	1.15533	1.15533	1.15533	1.15533	1.15533	1.15533	0.914933	0.424102	0.852263	-0.109636	-0.361802	-0.352801	-0.500154	-0.925699	-1.14553	-1.14553	-1.14553	-1.14553	-1.14553	-1.14553
chr15:52805246_52805746	1.35012	1.35012	1.35012	1.35012	1.35012	1.35012	0.308341	-0.00485205	0.301605	-0.440095	-0.516889	-0.229348	-0.475543	-0.80101	-1.04049	-1.04049	-1.04049	-1.04049	-1.04049	-1.04049
chr11:45384784_45385284	1.18322	1.18322	1.18322	1.18322	1.18322	1.18322	0.727817	0.47605	0.47605	0.263714	-0.294727	-0.294727	-0.435435	-1.14543	-1.14543	-1.14543	-1.14543	-1.14543	-1.14543	-1.14543
chr6:99349177_99349677	1.35245	1.35245	1.35245	1.35245	1.35245	1.35245	0.525088	0.244805	-0.301156	-0.301156	-0.400424	-0.492985	-1.05292	-1.37849	-0.826242	-0.826242	-0.826242	-0.826242	-0.826242	-0.826242
chr10:119165066_119165566	1.11634	1.11634	1.11634	1.11634	1.11634	1.11634	0.529142	0.861959	0.663206	0.312486	-0.0651243	-0.491633	-0.382155	-0.817764	-1.21803	-1.21803	-1.21803	-1.21803	-1.21803	-1.21803
chr10:16817299_16817799	1.34227	1.34227	1.34227	1.34227	1.34227	1.34227	0.563148	0.35782	-0.173992	-0.128443	-0.768045	-0.729571	-0.677263	-0.65596	-0.973551	-0.973551	-0.973551	-0.973551	-0.973551	-0.973551
chr9:11577507_11578007	1.20287	1.20287	1.20287	1.20287	1.20287	1.20287	1.03938	1.03938	-0.179737	-0.584467	-0.308029	-0.653041	-0.653041	-0.988237	-0.988237	-0.988237	-0.988237	-0.988237	-0.988237	-0.988237
chr19:9768445_9768945	1.0077	1.0077	1.0077	1.0077	1.0077	1.0077	0.821077	0.994332	0.773569	0.471039	0.336648	-0.56316	-1.31015	-1.36159	-1.03466	-1.03466	-1.03466	-1.03466	-1.03466	-1.03466
chr1:959088_959588	1.27107	1.27107	1.27107	1.27107	1.27107	1.27107	0.956192	0.704244	-0.271986	-0.686651	-0.922926	-1.34961	-1.03881	-0.764101	-0.708796	-0.708796	-0.708796	-0.708796	-0.708796	-0.708796
chr1:147242355_147242855	1.24171	1.24171	1.24171	1.24171	1.24171	1.24171	0.776346	0.78689	0.0285333	-0.274257	-0.964425	-0.57845	-0.206612	-0.699913	-1.05306	-1.05306	-1.05306	-1.05306	-1.05306	-1.05306
chr5:172355024_172355524	1.02939	1.02939	1.02939	1.02939	1.02939	1.02939	1.02939	1.02939	0.830414	0.335479	-0.319254	-0.483359	-0.837856	-1.36977	-1.06512	-1.06512	-1.06512	-1.06512	-1.06512	-1.06512
chr17:173115_173615	1.24679	1.24679	1.24679	1.24679	1.24679	1.24679	0.790452	0.476605	0.220635	0.0037088	-0.55588	-0.888901	-0.222329	-1.02108	-1.04732	-1.04732	-1.04732	-1.04732	-1.04732	-1.04732
chr5:140401372_140401872	1.1653	1.1653	1.1653	1.1653	1.1653	1.1653	0.99027	1.04033	0.0597146	-0.197118	-0.56989	-0.155482	-0.826358	-1.21569	-1.01959	-1.01959	-1.01959	-1.01959	-1.01959	-1.01959
chr7:23181741_23182241	1.03308	1.03308	1.03308	1.03308	1.03308	1.03308	0.791945	0.811508	0.643529	0.237906	0.272217	-0.0305806	-0.70151	-0.450488	-1.2955	-1.2955	-1.2955	-1.2955	-1.2955	-1.2955
chr12:123712011_123712511	1.39651	1.39651	1.39651	1.39651	1.39651	1.39651	0.284589	0.208161	-0.334199	-0.392499	-0.85256	-1.05633	-0.93285	-0.367317	-0.822673	-0.822673	-0.822673	-0.822673	-0.822673	-0.822673
chr1:236604283_236604783	1.23718	1.23718	1.23718	1.23718	1.23718	1.23718	1.14384	0.557191	0.00936157	-0.606556	-0.463171	-0.375828	-1.21286	-0.818957	-0.942687	-0.942687	-0.942687	-0.942687	-0.942687	-0.942687
chr14:64972038_64972538	1.3317	1.3317	1.3317	1.3317	1.3317	1.3317	0.874592	0.419517	-0.496023	-0.623294	-1.05545	-0.894955	-0.894955	-0.907487	-0.735363	-0.735363	-0.735363	-0.735363	-0.735363	-0.735363
chr2:166375736_166376236	1.12113	1.12113	1.12113	1.12113	1.12113	1.12113	0.879689	0.466752	0.226468	0.505319	0.390929	-0.31208	-0.969998	-0.993793	-1.15335	-1.15335	-1.15335	-1.15335	-1.15335	-1.15335
chr4:90127120_90127620	1.3506	1.3506	1.3506	1.3506	1.3506	1.3506	0.520104	0.0648843	0.0648843	-0.2471	-0.429899	-0.655176	-0.545285	-0.776177	-1.01664	-1.01664	-1.01664	-1.01664	-1.01664	-1.01664
chr13:30791482_30791982	1.03779	1.03779	1.03779	1.03779	1.03779	1.03779	1.02312	0.946614	1.01119	0.188689	-0.24386	-0.774913	-0.91628	-1.33509	-1.02103	-1.02103	-1.02103	-1.02103	-1.02103	-1.02103
chr11:69192210_69192710	1.09129	1.09129	1.09129	1.09129	1.09129	1.09129	0.627117	0.933861	0.529101	0.361217	0.107753	-0.305801	-0.55317	-0.972008	-1.21263	-1.21263	-1.21263	-1.21263	-1.21263	-1.21263
chr1:114669873_114670373	1.23358	1.23358	1.23358	1.23358	1.23358	1.23358	1.16725	0.198936	0.198936	-0.113269	-0.366745	-0.592182	-0.665351	-0.895841	-1.05553	-1.05553	-1.05553	-1.05553	-1.05553	-1.05553
chr7:93544580_93545080	1.1444	1.1444	1.1444	1.1444	1.1444	1.1444	0.554542	0.554542	0.662838	0.535431	0.0748419	-0.626471	-0.767859	-1.09948	-1.1258	-1.1258	-1.1258	-1.1258	-1.1258	-1.1258
chr14:92748443_92748943	1.29895	1.29895	1.29895	1.29895	1.29895	1.29895	0.501841	0.501841	0.106979	-0.558842	-0.0987711	-1.02203	-1.4838	-1.08941	-0.775256	-0.775256	-0.775256	-0.775256	-0.775256	-0.775256
chr2:218356540_218357040	1.23432	1.23432	1.23432	1.23432	1.23432	1.23432	0.918088	0.918088	-0.30662	-0.568859	-0.425285	-0.202308	-0.764899	-0.996308	-0.996308	-0.996308	-0.996308	-0.996308	-0.996308	-0.996308
chr8:8228230_8228730	1.30841	1.30841	1.30841	1.30841	1.30841	1.30841	0.58838	-0.368854	0.0617738	0.446365	-0.282223	-0.580682	-0.583662	-0.887945	-1.0406	-1.0406	-1.0406	-1.0406	-1.0406	-1.0406
chr6:125986208_125986708	1.15809	1.15809	1.15809	1.15809	1.15809	1.15809	0.950128	0.456245	-0.247194	0.032174	0.436045	-0.0872903	-0.540234	-0.658853	-1.21492	-1.21492	-1.21492	-1.21492	-1.21492	-1.21492
chr1:150697077_150697577	1.27842	1.27842	1.27842	1.27842	1.27842	1.27842	1.16083	0.116838	-0.278431	-0.492041	-0.735588	-0.347833	-0.258998	-0.670237	-1.02751	-1.02751	-1.02751	-1.02751	-1.02751	-1.02751
chr6:116680821_116681321	1.19294	1.19294	1.19294	1.19294	1.19294	1.19294	0.833782	0.456597	0.650782	0.184014	-0.375098	-1.21526	-0.994622	-1.22639	-0.911907	-0.911907	-0.911907	-0.911907	-0.911907	-0.911907
chr7:6158036_6158536	1.27104	1.27104	1.27104	1.27104	1.27104	1.27104	0.954391	0.366194	-0.0158782	-0.32857	-0.32857	-0.32857	-0.790982	-1.02204	-1.02204	-1.02204	-1.02204	-1.02204	-1.02204	-1.02204
chr12:31590890_31591390	1.38241	1.38241	1.38241	1.38241	1.38241	1.38241	0.333882	0.0186612	-0.743531	-0.481096	-1.20536	-1.38534	-1.14432	-0.418616	-0.544789	-0.544789	-0.544789	-0.544789	-0.544789	-0.544789
chr7:100271997_100272497	1.16497	1.16497	1.16497	1.16497	1.16497	1.16497	1.0473	0.669888	0.287707	-0.0250727	0.0093746	-0.537447	-0.982429	-1.21355	-1.04093	-1.04093	-1.04093	-1.04093	-1.04093	-1.04093
chr12:123268040_123268540	1.07346	1.07346	1.07346	1.07346	1.07346	1.07346	1.00696	0.445761	-0.0985605	0.532233	0.537256	-0.0225847	-0.559796	-0.791432	-1.24843	-1.24843	-1.24843	-1.24843	-1.24843	-1.24843
chr17:8630732_8631232	1.37392	1.37392	1.37392	1.37392	1.37392	1.37392	0.166761	0.607754	-0.155123	-0.880788	-0.751439	-1.04666	-0.752603	-0.600135	-0.805217	-0.805217	-0.805217	-0.805217	-0.805217	-0.805217
chr4:144111832_144112332	1.22767	1.22767	1.22767	1.22767	1.22767	1.22767	1.0193	0.703653	0.0151835	-0.19881	-0.57925	-0.494859	-0.636665	-1.07554	-1.01984	-1.01984	-1.01984	-1.01984	-1.01984	-1.01984
chr12:48183228_48183728	1.34442	1.34442	1.34442	1.34442	1.34442	1.34442	0.627934	0.312146	-0.53695	-0.646792	-0.367111	-0.129822	-0.71373	-0.737627	-0.979092	-0.979092	-0.979092	-0.979092	-0.979092	-0.979092
chr3:131655426_131655926	1.30105	1.30105	1.30105	1.30105	1.30105	1.30105	0.717362	0.717362	-0.393217	-0.503138	-0.503138	-0.503138	-0.532832	-0.97222	-0.97222	-0.97222	-0.97222	-0.97222	-0.97222	-0.97222
chr2:130351485_130351985	1.38227	1.38227	1.38227	1.38227	1.38227	1.38227	-0.20804	-0.623065	0.120511	0.186521	-0.0577568	-0.512024	-0.422923	-0.760992	-1.00264	-1.00264	-1.00264	-1.00264	-1.00264	-1.00264
chr7:112206243_112206743	1.08007	1.08007	1.08007	1.08007	1.08007	1.08007	1.01509	0.668879	1.03786	-0.14979	-0.0330766	-0.919752	-1.25793	-1.49026	-0.891906	-0.891906	-0.891906	-0.891906	-0.891906	-0.891906
chr22:43562670_43563170	1.22668	1.22668	1.22668	1.22668	1.22668	1.22668	1.03839	0.580747	0.197509	-0.0168277	-0.676799	-0.793165	-1.14292	-0.935287	-0.935287	-0.935287	-0.935287	-0.935287	-0.935287	-0.935287
chr22:38828192_38828692	1.0732	1.0732	1.0732	1.0732	1.0732	1.0732	1.0732	0.951368	0.568012	0.149608	-0.0948439	-0.363927	-1.20598	-1.20598	-1.05177	-1.05177	-1.05177	-1.05177	-1.05177	-1.05177
chr4:120922691_120923191	1.19299	1.19299	1.19299	1.19299	1.19299	1.19299	0.966087	0.976724	0.125997	-0.179457	-0.839927	-1.30535	-0.894927	-1.22832	-0.796465	-0.796465	-0.796465	-0.796465	-0.796465	-0.796465
chr12:5072247_5072747	1.37666	1.37666	1.37666	1.37666	1.37666	1.37666	0.783661	-0.0484786	-0.432006	-0.646505	-0.646505	-0.646505	-0.646505	-0.646505	-0.888435	-0.888435	-0.888435	-0.888435	-0.888435	-0.888435
chr10:118046718_118047218	1.2232	1.2232	1.2232	1.2232	1.2232	1.2232	0.965856	0.469741	-0.236877	-0.0752837	0.0264467	-0.273497	-0.526375	-1.18368	-1.08426	-1.08426	-1.08426	-1.08426	-1.08426	-1.08426
chr5:161548666_161549166	1.00088	1.00088	1.00088	1.00088	1.00088	1.00088	0.934168	0.61765	0.61765	0.403067	0.277093	-0.0542586	-0.0542586	-0.856497	-1.31498	-1.31498	-1.31498	-1.31498	-1.31498	-1.31498
chr1:52098154_52098654	1.26276	1.26276	1.26276	1.26276	1.26276	1.26276	0.920778	0.691359	0.0276172	-0.558683	-1.3115	-1.06121	-0.745809	-0.876542	-0.777091	-0.777091	-0.777091	-0.777091	-0.777091	-0.777091
chr22:38681606_38682106	1.06375	1.06375	1.06375	1.06375	1.06375	1.06375	0.997024	0.7138	0.7138	0.58564	-0.167282	-0.481143	-1.19311	-1.22731	-1.05398	-1.05398	-1.05398	-1.05398	-1.05398	-1.05398
chr13:88526456_88526956	1.09695	1.09695	1.09695	1.09695	1.09695	1.09695	1.09695	0.638571	0.0867291	-0.0234181	0.255952	0.111529	-0.454434	-0.977255	-1.21939	-1.21939	-1.21939	-1.21939	-1.21939	-1.21939
chr10:3126948_3127448	1.18082	1.18082	1.18082	1.18082	1.18082	1.18082	1.18082	0.864086	0.012444	-0.743762	-0.350516	-0.599657	-0.383963	-0.615941	-1.07474	-1.07474	-1.07474	-1.07474	-1.07474	-1.07474
chr4:153151985_153152485	1.31586	1.31586	1.31586	1.31586	1.31586	1.31586	0.722219	0.405482	0.00813738	-0.400976	-0.758072	-0.602361	-0.491682	-0.830509	-0.991231	-0.991231	-0.991231	-0.991231	-0.991231	-0.991231
chr9:81686929_81687429	1.21745	1.21745	1.21745	1.21745	1.21745	1.21745	0.886447	0.569677	0.185694	-0.0290597	-0.273912	-0.500829	-0.635621	-0.679142	-1.13799	-1.13799	-1.13799	-1.13799	-1.13799	-1.13799
chr6:109690960_109691460	1.14183	1.14183	1.14183	1.14183	1.14183	1.14183	0.680685	1.12056	0.567867	0.212829	-0.541471	-1.08443	-0.973601	-0.928767	-0.984113	-0.984113	-0.984113	-0.984113	-0.984113	-0.984113
chr4:103719637_103720137	1.25526	1.25526	1.25526	1.25526	1.25526	1.25526	0.936482	0.477172	0.092539	-0.317311	-0.374887	-0.602188	-0.602188	-0.6262	-1.08583	-1.08583	-1.08583	-1.08583	-1.08583	-1.08583
chr6:138988034_138988534	1.08434	1.08434	1.08434	1.08434	1.08434	1.08434	0.741435	0.282005	0.39122	0.705067	0.487396	-0.219869	-0.469362	-1.06537	-1.22642	-1.22642	-1.22642	-1.22642	-1.22642	-1.22642
chr10:98134360_98134860	1.12152	1.12152	1.12152	1.12152	1.12152	1.12152	0.535158	0.872402	0.702586	0.292528	0.107993	-0.526541	-0.885357	-1.11827	-1.11827	-1.11827	-1.11827	-1.11827	-1.11827	-1.11827
chr16:68069475_68069975	1.14451	1.14451	1.14451	1.14451	1.14451	1.14451	0.825514	0.995253	0.447429	-0.053627	-0.299062	-0.569227	-0.458273	-0.899756	-1.14255	-1.14255	-1.14255	-1.14255	-1.14255	-1.14255
chr2:219571265_219571765	1.24936	1.24936	1.24936	1.24936	1.24936	1.24936	1.15505	-0.0937148	0.356496	-0.14473	-0.464708	-0.56428	-0.646824	-1.06139	-1.00534	-1.00534	-1.00534	-1.00534	-1.00534	-1.00534
chr3:21795100_21795600	1.33116	1.33116	1.33116	1.33116	1.33116	1.33116	0.735592	0.142595	-0.242596	-0.353126	-0.818175	-0.5794	-0.234653	-0.467387	-1.0283	-1.0283	-1.0283	-1.0283	-1.0283	-1.0283
chr1:110258694_110259194	1.13882	1.13882	1.13882	1.13882	1.13882	1.13882	0.97302	0.8506	0.465392	0.0225081	-0.0554111	-0.674425	-1.14063	-0.931935	-1.05701	-1.05701	-1.05701	-1.05701	-1.05701	-1.05701
chr4:39045059_39045559	1.12617	1.12617	1.12617	1.12617	1.12617	1.12617	0.806905	0.806905	0.605298	0.194815	-0.12533	-0.319162	-0.887146	-1.1199	-1.1199	-1.1199	-1.1199	-1.1199	-1.1199	-1.1199
chr3:113695966_113696466	1.42816	1.42816	1.42816	1.42816	1.42816	1.42816	0.211926	-0.248206	-1.10291	-0.821015	-1.06672	-0.547173	-1.01352	-0.745076	-0.539375	-0.539375	-0.539375	-0.539375	-0.539375	-0.539375
chr14:89417057_89417557	1.28998	1.28998	1.28998	1.28998	1.28998	1.28998	0.811506	0.218263	0.283501	-0.388964	-0.23503	-0.600858	-0.952536	-0.959467	-0.986047	-0.986047	-0.986047	-0.986047	-0.986047	-0.986047
chr12:30754768_30755268	1.26619	1.26619	1.26619	1.26619	1.26619	1.26619	1.19917	0.251384	-0.501776	-1.33291	-1.05042	-1.21102	-0.945698	-0.856605	-0.524873	-0.524873	-0.524873	-0.524873	-0.524873	-0.524873
chr10:68407119_68407619	1.26636	1.26636	1.26636	1.26636	1.26636	1.26636	1.14765	0.269588	-0.585676	-0.257378	-0.0821044	-0.480071	-0.828673	-0.698699	-1.0138	-1.0138	-1.0138	-1.0138	-1.0138	-1.0138
chr16:7324377_7324877	1.22237	1.22237	1.22237	1.22237	1.22237	1.22237	0.634752	0.469549	0.0838972	-0.13179	0.148887	-0.140579	-0.500164	-0.733386	-1.19423	-1.19423	-1.19423	-1.19423	-1.19423	-1.19423
chr2:112254888_112255388	1.26749	1.26749	1.26749	1.26749	1.26749	1.26749	0.804867	0.261913	0.261913	0.133107	-0.516384	-0.994311	-0.88313	-1.32552	-0.891237	-0.891237	-0.891237	-0.891237	-0.891237	-0.891237
chr10:119725782_119726282	1.33047	1.33047	1.33047	1.33047	1.33047	1.33047	0.698683	0.163955	-0.44081	-0.642863	-0.198118	-0.734659	-1.43889	-1.39561	-0.665751	-0.665751	-0.665751	-0.665751	-0.665751	-0.665751
chr7:151519125_151519625	1.00193	1.00193	1.00193	1.00193	1.00193	1.00193	0.682081	0.854966	0.81463	0.498787	-0.16581	-0.00328281	-0.253548	-0.487453	-1.32532	-1.32532	-1.32532	-1.32532	-1.32532	-1.32532
chr11:57289074_57289574	1.36943	1.36943	1.36943	1.36943	1.36943	1.36943	0.772644	0.0532342	-0.332742	-1.0063	-0.724291	-0.704116	-0.950872	-0.551899	-0.795372	-0.795372	-0.795372	-0.795372	-0.795372	-0.795372
chr5:126600644_126601144	1.27135	1.27135	1.27135	1.27135	1.27135	1.27135	0.683209	0.703046	-0.00800079	-0.228093	-0.474227	-0.355351	-0.822508	-0.942409	-1.03062	-1.03062	-1.03062	-1.03062	-1.03062	-1.03062
chr1:234709890_234710390	1.18023	1.18023	1.18023	1.18023	1.18023	1.18023	0.860315	0.249414	0.44566	0.0343485	-0.211793	0.0556607	-0.513469	-0.7477	-1.20897	-1.20897	-1.20897	-1.20897	-1.20897	-1.20897
chr1:197915247_197915747	1.31266	1.31266	1.31266	1.31266	1.31266	1.31266	0.992693	0.398338	-0.840822	-1.06096	-1.16188	-0.825343	-0.855269	-0.646104	-0.646104	-0.646104	-0.646104	-0.646104	-0.646104	-0.646104
chr2:174248441_174248941	1.26359	1.26359	1.26359	1.26359	1.26359	1.26359	0.458876	-0.636208	-1.5	-1.5	-1.38568	-0.623745	-0.688372	-0.321576	-0.166053	-0.166053	-0.166053	-0.166053	-0.166053	-0.166053
chr17:19977619_19978119	1.25895	1.25895	1.25895	1.25895	1.25895	1.25895	0.788219	0.502705	0.25883	-0.185945	-0.944956	-0.683358	-0.366895	-0.60198	-1.05339	-1.05339	-1.05339	-1.05339	-1.05339	-1.05339
chr11:86800184_86800684	1.27415	1.27415	1.27415	1.27415	1.27415	1.27415	0.572352	0.862269	-0.131857	-0.893885	-1.21542	-1.29092	-1.20093	-0.893977	-0.575419	-0.575419	-0.575419	-0.575419	-0.575419	-0.575419
chr11:3808338_3808838	1.07844	1.07844	1.07844	1.07844	1.07844	1.07844	1.07844	1.07844	0.396494	-0.0158448	0.00270645	-0.619137	-0.493745	-1.12828	-1.12828	-1.12828	-1.12828	-1.12828	-1.12828	-1.12828
chr6:13814298_13814798	1.3418	1.3418	1.3418	1.3418	1.3418	1.3418	0.154619	0.325309	-0.387692	-0.836516	-1.01904	-1.5	-1.35539	-0.948488	-0.401797	-0.401797	-0.401797	-0.401797	-0.401797	-0.401797
chr18:75159152_75159652	1.2134	1.2134	1.2134	1.2134	1.2134	1.2134	1.1461	0.0880401	-0.136924	0.0351912	0.0700805	-0.264214	-0.51168	-1.05324	-1.10896	-1.10896	-1.10896	-1.10896	-1.10896	-1.10896
chr6:3068744_3069244	1.17768	1.17768	1.17768	1.17768	1.17768	1.17768	0.706591	0.874977	0.487831	-0.0630072	-0.141319	-0.767996	-0.656394	-0.809341	-1.11624	-1.11624	-1.11624	-1.11624	-1.11624	-1.11624
chr7:130380146_130380646	1.18155	1.18155	1.18155	1.18155	1.18155	1.18155	1.16666	0.909845	0.029621	-0.580464	-0.837789	-1.00495	-1.4234	-1.24682	-0.683669	-0.683669	-0.683669	-0.683669	-0.683669	-0.683669
chr2:219160027_219160527	1.28061	1.28061	1.28061	1.28061	1.28061	1.28061	0.690438	0.725144	-0.107869	-0.55319	-0.767694	-1.39886	-0.590973	-0.275937	-0.900785	-0.900785	-0.900785	-0.900785	-0.900785	-0.900785
chr19:36331550_36332050	1.08611	1.08611	1.08611	1.08611	1.08611	1.08611	0.740898	0.509307	0.821965	0.409242	0.0489966	-0.285509	-1.38268	-1.5	-0.945374	-0.945374	-0.945374	-0.945374	-0.945374	-0.945374
chr9:95091562_95092062	0.983116	0.983116	0.983116	0.983116	0.983116	0.983116	0.983116	0.983116	0.595761	0.48461	0.357429	-0.173433	-0.842052	-1.18389	-1.18389	-1.18389	-1.18389	-1.18389	-1.18389	-1.18389
chr8:70092601_70093101	1.19672	1.19672	1.19672	1.19672	1.19672	1.19672	0.189196	0.0232313	0.244446	0.460098	0.622807	-0.16345	-0.517028	-0.751689	-1.21466	-1.21466	-1.21466	-1.21466	-1.21466	-1.21466
chr3:155741085_155741585	1.30576	1.30576	1.30576	1.30576	1.30576	1.30576	1.13899	0.079978	-0.466673	-0.431281	-0.39636	-0.56359	-0.691134	-0.691134	-0.968888	-0.968888	-0.968888	-0.968888	-0.968888	-0.968888
chr16:57984805_57985305	1.22007	1.22007	1.22007	1.22007	1.22007	1.22007	0.438111	0.472846	0.0615148	0.312519	0.107169	-0.0927658	-0.832508	-0.724749	-1.17709	-1.17709	-1.17709	-1.17709	-1.17709	-1.17709
chr1:236281846_236282346	1.38012	1.38012	1.38012	1.38012	1.38012	1.38012	0.471028	0.00803054	0.118953	-0.507721	-0.624081	-0.819167	-0.92464	-0.747851	-0.875879	-0.875879	-0.875879	-0.875879	-0.875879	-0.875879
chr19:12840383_12840883	1.13539	1.13539	1.13539	1.13539	1.13539	1.13539	1.01597	0.758776	0.370927	-0.0788177	0.0840664	-0.53919	-0.569254	-1.38021	-1.0791	-1.0791	-1.0791	-1.0791	-1.0791	-1.0791
chr5:150357315_150357815	1.33028	1.33028	1.33028	1.33028	1.33028	1.33028	0.32573	0.0684737	0.178598	-0.12375	-0.221282	-0.235304	-0.919048	-1.38344	-0.945275	-0.945275	-0.945275	-0.945275	-0.945275	-0.945275
chr11:12366171_12366671	1.29349	1.29349	1.29349	1.29349	1.29349	1.29349	1.12649	0.403359	-0.311337	-0.628859	-0.730272	-0.730272	-0.978306	-0.978306	-0.82224	-0.82224	-0.82224	-0.82224	-0.82224	-0.82224
chr3:28348900_28349400	1.36447	1.36447	1.36447	1.36447	1.36447	1.36447	0.55391	-0.430904	-0.403443	-0.90851	-0.521523	-1.44057	-1.32873	-1.01316	-0.448978	-0.448978	-0.448978	-0.448978	-0.448978	-0.448978
chr7:54664271_54664771	1.3106	1.3106	1.3106	1.3106	1.3106	1.3106	0.845139	0.121869	0.0470592	-0.219631	-0.405709	-0.551708	-0.799788	-1.03425	-0.977762	-0.977762	-0.977762	-0.977762	-0.977762	-0.977762
chr4:8747117_8747617	1.07762	1.07762	1.07762	1.07762	1.07762	1.07762	0.886883	1.05809	0.342932	0.231532	0.191699	-0.44093	-0.690999	-1.12632	-1.1531	-1.1531	-1.1531	-1.1531	-1.1531	-1.1531
chr7:2075882_2076382	1.20383	1.20383	1.20383	1.20383	1.20383	1.20383	0.882027	0.882027	0.166748	0.0553289	-0.515807	-0.74527	-0.993506	-0.993506	-0.993506	-0.993506	-0.993506	-0.993506	-0.993506	-0.993506
chr20:903125_903625	0.968873	0.968873	0.968873	0.968873	0.968873	0.968873	0.968873	0.968873	0.580546	0.409639	0.194581	-0.241531	-0.241531	-0.476161	-1.32942	-1.32942	-1.32942	-1.32942	-1.32942	-1.32942
chr2:170828861_170829361	1.05525	1.05525	1.05525	1.05525	1.05525	1.05525	0.58937	0.60933	0.806793	0.392932	0.427939	-0.104351	-0.574419	-1.2113	-1.2113	-1.2113	-1.2113	-1.2113	-1.2113	-1.2113
chr13:44141788_44142288	1.07544	1.07544	1.07544	1.07544	1.07544	1.07544	0.880781	0.708063	0.633165	0.267856	0.259389	-0.172647	-1.12128	-0.990313	-1.15295	-1.15295	-1.15295	-1.15295	-1.15295	-1.15295
chr14:74457023_74457523	1.12635	1.12635	1.12635	1.12635	1.12635	1.12635	0.958997	0.958997	0.570201	-0.189373	-0.189373	-0.626012	-0.65615	-0.776922	-1.13474	-1.13474	-1.13474	-1.13474	-1.13474	-1.13474
chr5:168579506_168580006	1.33762	1.33762	1.33762	1.33762	1.33762	1.33762	0.553233	-0.0621839	-0.486047	-1.17796	-0.709067	-1.2168	-1.32258	-1.31256	-0.381963	-0.381963	-0.381963	-0.381963	-0.381963	-0.381963
chr12:51836657_51837157	1.23228	1.23228	1.23228	1.23228	1.23228	1.23228	0.630813	0.943624	0.227032	-0.0913314	-0.663516	-0.602856	-0.753896	-0.988934	-1.01577	-1.01577	-1.01577	-1.01577	-1.01577	-1.01577
chr1:161044938_161045438	1.19956	1.19956	1.19956	1.19956	1.19956	1.19956	0.729311	0.898526	0.495894	-0.0985864	-0.524453	-0.985798	-1.24344	-0.901112	-0.927947	-0.927947	-0.927947	-0.927947	-0.927947	-0.927947
chr10:47039698_47040198	1.01159	1.01159	1.01159	1.01159	1.01159	1.01159	0.688993	0.522252	0.522252	0.522252	0.540913	0.0910394	-0.380051	-0.500963	-1.34604	-1.34604	-1.34604	-1.34604	-1.34604	-1.34604
chr8:60516586_60517086	1.1252	1.1252	1.1252	1.1252	1.1252	1.1252	0.850901	0.618129	0.073025	0.0713253	-0.0915911	0.178801	-0.663152	-0.123878	-1.27746	-1.27746	-1.27746	-1.27746	-1.27746	-1.27746
chr6:113172366_113172866	1.22517	1.22517	1.22517	1.22517	1.22517	1.22517	0.758146	0.158748	0.158748	0.0470256	0.0470256	-0.289223	-0.289223	-0.735812	-1.20107	-1.20107	-1.20107	-1.20107	-1.20107	-1.20107
chr1:223496953_223497453	1.16822	1.16822	1.16822	1.16822	1.16822	1.16822	1.16822	0.568286	0.17859	0.0667676	-0.181728	-0.518277	-0.767412	-0.767412	-1.12606	-1.12606	-1.12606	-1.12606	-1.12606	-1.12606
chr5:43105662_43106162	1.34182	1.34182	1.34182	1.34182	1.34182	1.34182	0.873994	-0.192077	-0.0813624	-0.29949	-0.54819	-0.462167	-0.711507	-0.947157	-0.947157	-0.947157	-0.947157	-0.947157	-0.947157	-0.947157
chr6:19040325_19040825	1.34024	1.34024	1.34024	1.34024	1.34024	1.34024	1.01698	0.170685	-0.547834	-0.765981	-0.765981	-0.832218	-0.832218	-0.832218	-0.775441	-0.775441	-0.775441	-0.775441	-0.775441	-0.775441
chr10:47226982_47227482	1.16725	1.16725	1.16725	1.16725	1.16725	1.16725	0.83087	0.663708	0.827144	-0.0135602	-0.484688	-0.657356	-1.0212	-1.0212	-1.0212	-1.0212	-1.0212	-1.0212	-1.0212	-1.0212
chr9:15510687_15511187	1.27475	1.27475	1.27475	1.27475	1.27475	1.27475	0.93813	0.552502	-0.264398	-0.482796	-0.954256	-1.10029	-1.25191	-1.29617	-0.631552	-0.631552	-0.631552	-0.631552	-0.631552	-0.631552
chr1:24744897_24745397	1.38115	1.38115	1.38115	1.38115	1.38115	1.38115	0.336335	0.258009	-0.608232	-0.812799	-1.37806	-1.13662	-0.869836	-0.724561	-0.558524	-0.558524	-0.558524	-0.558524	-0.558524	-0.558524
chr22:37971691_37972191	1.133	1.133	1.133	1.133	1.133	1.133	0.784942	0.462776	0.387488	0.169076	0.352357	-0.28402	-0.33875	-0.979119	-1.22546	-1.22546	-1.22546	-1.22546	-1.22546	-1.22546
chr6:85593664_85594164	1.29383	1.29383	1.29383	1.29383	1.29383	1.29383	1.04642	0.219193	-0.483554	-0.45495	-0.0777113	-0.621464	-0.567675	-0.898239	-0.987496	-0.987496	-0.987496	-0.987496	-0.987496	-0.987496
chr17:29148726_29149226	1.12023	1.12023	1.12023	1.12023	1.12023	1.12023	1.07824	1.09831	0.319251	0.0148559	-0.753393	-0.962241	-0.514422	-0.549227	-1.07546	-1.07546	-1.07546	-1.07546	-1.07546	-1.07546
chr16:67664190_67664690	1.37317	1.37317	1.37317	1.37317	1.37317	1.37317	0.52222	-0.325248	0.184061	-0.733008	-0.319904	-0.492734	-0.742442	-0.593573	-0.956394	-0.956394	-0.956394	-0.956394	-0.956394	-0.956394
chr7:149772245_149772745	1.2705	1.2705	1.2705	1.2705	1.2705	1.2705	0.666575	0.344348	-0.0462483	0.0210568	-0.342228	-0.183818	-0.433529	-0.88155	-1.12794	-1.12794	-1.12794	-1.12794	-1.12794	-1.12794
chr5:134737650_134738150	1.28791	1.28791	1.28791	1.28791	1.28791	1.28791	0.819344	0.0912534	0.0912534	-0.177214	-0.177214	-0.272423	-1.13046	-1.02197	-0.991667	-0.991667	-0.991667	-0.991667	-0.991667	-0.991667
chr10:123300987_123301487	1.39996	1.39996	1.39996	1.39996	1.39996	1.39996	0.435195	0.112817	-0.607048	-0.321156	-0.893194	-0.503776	-0.753604	-0.989715	-0.813212	-0.813212	-0.813212	-0.813212	-0.813212	-0.813212
chr6:71289207_71289707	1.22285	1.22285	1.22285	1.22285	1.22285	1.22285	0.754028	0.754028	0.363177	-0.0532988	-0.628202	-0.463599	-1.13825	-0.989284	-0.989284	-0.989284	-0.989284	-0.989284	-0.989284	-0.989284
chr12:57550331_57550831	1.2247	1.2247	1.2247	1.2247	1.2247	1.2247	0.372806	0.372806	0.372806	0.052784	0.052784	-0.0943375	-0.344325	-1.16193	-1.16193	-1.16193	-1.16193	-1.16193	-1.16193	-1.16193
chr22:37745867_37746367	1.29872	1.29872	1.29872	1.29872	1.29872	1.29872	0.709874	0.450553	0.0595031	-0.418385	-0.368504	-0.85308	-1.37981	-1.14455	-0.807987	-0.807987	-0.807987	-0.807987	-0.807987	-0.807987
chr5:1885060_1885560	1.09721	1.09721	1.09721	1.09721	1.09721	1.09721	0.621333	0.656375	0.58098	0.362257	0.425212	-0.212072	-0.918718	-1.36729	-1.12189	-1.12189	-1.12189	-1.12189	-1.12189	-1.12189
chr7:23299046_23299546	1.26513	1.26513	1.26513	1.26513	1.26513	1.26513	0.78923	0.800077	-0.254285	-0.473018	-0.18779	-0.732294	-0.655525	-0.708492	-1.02811	-1.02811	-1.02811	-1.02811	-1.02811	-1.02811
chr11:94767988_94768488	1.05046	1.05046	1.05046	1.05046	1.05046	1.05046	0.802548	0.724054	0.332696	0.27282	0.358186	0.083486	-0.501438	-0.468155	-1.31782	-1.31782	-1.31782	-1.31782	-1.31782	-1.31782
chr9:6681109_6681609	1.37397	1.37397	1.37397	1.37397	1.37397	1.37397	0.781301	-0.145099	-0.564616	-0.196792	-0.855889	-0.591224	-0.755161	-0.68112	-0.872538	-0.872538	-0.872538	-0.872538	-0.872538	-0.872538
chr12:95217413_95217913	1.24417	1.24417	1.24417	1.24417	1.24417	1.24417	0.654809	0.547749	0.246007	0.0899967	-0.631477	-0.700838	-0.199331	-0.977929	-1.08234	-1.08234	-1.08234	-1.08234	-1.08234	-1.08234
chr12:101830818_101831318	1.36518	1.36518	1.36518	1.36518	1.36518	1.36518	0.423211	0.27884	-0.855911	-0.85762	-0.368549	0.0288225	-0.548274	-0.875658	-0.902656	-0.902656	-0.902656	-0.902656	-0.902656	-0.902656
chr11:17472486_17472986	1.17169	1.17169	1.17169	1.17169	1.17169	1.17169	0.940111	0.617202	0.225779	0.225779	-0.0238185	-0.652821	-0.652821	-0.889726	-1.13664	-1.13664	-1.13664	-1.13664	-1.13664	-1.13664
chr3:8622838_8623338	1.23981	1.23981	1.23981	1.23981	1.23981	1.23981	1.23981	0.509991	-0.211309	-0.430299	-0.430299	-0.496793	-0.750712	-0.872342	-0.99948	-0.99948	-0.99948	-0.99948	-0.99948	-0.99948
chr2:31233742_31234242	1.32957	1.32957	1.32957	1.32957	1.32957	1.32957	0.961296	-0.109233	-0.666664	-1.22755	-0.467668	-0.439667	-0.368116	-0.236094	-0.903956	-0.903956	-0.903956	-0.903956	-0.903956	-0.903956
chr1:2227547_2228047	1.25296	1.25296	1.25296	1.25296	1.25296	1.25296	0.862527	-0.0871619	0.024884	0.228816	-0.251585	-0.462651	-0.142757	-1.2609	-1.07149	-1.07149	-1.07149	-1.07149	-1.07149	-1.07149
chr10:32346122_32346622	1.20908	1.20908	1.20908	1.20908	1.20908	1.20908	0.62209	0.965451	0.243693	-0.0683556	-0.28534	-0.524517	-0.783984	-1.02174	-1.06696	-1.06696	-1.06696	-1.06696	-1.06696	-1.06696
chr4:184472825_184473325	1.15812	1.15812	1.15812	1.15812	1.15812	1.15812	0.96556	0.235036	-0.16427	0.182098	0.232092	-0.154779	-0.1008	-0.621421	-1.25371	-1.25371	-1.25371	-1.25371	-1.25371	-1.25371
chr15:84715944_84716444	1.3105	1.3105	1.3105	1.3105	1.3105	1.3105	0.70418	0.596916	-0.203195	-0.631187	-0.881241	-0.860743	-0.424366	-0.391016	-0.962054	-0.962054	-0.962054	-0.962054	-0.962054	-0.962054
chr12:57128197_57128697	1.30481	1.30481	1.30481	1.30481	1.30481	1.30481	0.450129	0.189974	0.217742	-0.14455	-0.39471	-0.270642	-0.408356	-0.754565	-1.11898	-1.11898	-1.11898	-1.11898	-1.11898	-1.11898
chr10:46023231_46023731	1.01751	1.01751	1.01751	1.01751	1.01751	1.01751	0.949284	0.689072	0.613425	0.482378	-0.0947924	-0.217037	-0.247453	-0.308532	-1.32857	-1.32857	-1.32857	-1.32857	-1.32857	-1.32857
chr10:131758492_131758992	1.37988	1.37988	1.37988	1.37988	1.37988	1.37988	0.524991	-0.0960325	-0.343405	-0.0563275	-0.530082	-0.530082	-0.782842	-0.782842	-0.947106	-0.947106	-0.947106	-0.947106	-0.947106	-0.947106
chr14:73136164_73136664	1.23309	1.23309	1.23309	1.23309	1.23309	1.23309	0.498612	0.842495	0.55125	-0.0970256	-0.671439	-0.721094	-0.975561	-1.12702	-0.949788	-0.949788	-0.949788	-0.949788	-0.949788	-0.949788
chr11:64305101_64305601	1.19914	1.19914	1.19914	1.19914	1.19914	1.19914	1.01269	0.476916	0.038653	-0.401797	0.0885259	0.018985	-0.84703	-1.21042	-1.06189	-1.06189	-1.06189	-1.06189	-1.06189	-1.06189
chr13:32315206_32315706	1.26626	1.26626	1.26626	1.26626	1.26626	1.26626	0.940827	0.208958	-0.183703	-0.314839	-0.50313	-1.22304	-1.5	-1.27434	-0.594672	-0.594672	-0.594672	-0.594672	-0.594672	-0.594672
chr11:27197605_27198105	1.25177	1.25177	1.25177	1.25177	1.25177	1.25177	1.00301	0.878204	-0.217776	-0.776526	-0.701518	-0.701518	-0.629773	-0.958243	-0.901079	-0.901079	-0.901079	-0.901079	-0.901079	-0.901079
chr17:80443756_80444256	1.10693	1.10693	1.10693	1.10693	1.10693	1.10693	0.357455	0.409107	0.964094	0.5948	0.164891	-0.636014	-1.36467	-1.5	-0.908479	-0.908479	-0.908479	-0.908479	-0.908479	-0.908479
chr3:193592917_193593417	1.32315	1.32315	1.32315	1.32315	1.32315	1.32315	0.610351	0.00538858	-0.222991	0.146312	-0.209077	-0.467685	-0.933795	-0.588025	-1.04656	-1.04656	-1.04656	-1.04656	-1.04656	-1.04656
chr4:76213147_76213647	1.40543	1.40543	1.40543	1.40543	1.40543	1.40543	0.549282	-0.303369	-0.379129	-0.510373	-0.569198	-0.738823	-0.415793	-0.653976	-0.901868	-0.901868	-0.901868	-0.901868	-0.901868	-0.901868
chr11:57637485_57637985	1.30264	1.30264	1.30264	1.30264	1.30264	1.30264	0.703395	0.0979363	0.0221169	0.0898852	-0.384937	-0.504353	-0.633823	-0.762214	-1.07398	-1.07398	-1.07398	-1.07398	-1.07398	-1.07398
chr1:53889614_53890114	1.23239	1.23239	1.23239	1.23239	1.23239	1.23239	0.906325	0.645426	0.0798232	-0.283506	-0.534381	-0.447606	-0.409451	-0.647163	-1.1173	-1.1173	-1.1173	-1.1173	-1.1173	-1.1173
chr12:122064784_122065284	1.14019	1.14019	1.14019	1.14019	1.14019	1.14019	1.07178	0.903233	0.502381	-0.0988292	-0.349722	-0.689518	-0.941057	-0.985652	-1.04229	-1.04229	-1.04229	-1.04229	-1.04229	-1.04229
chrX:104166212_104166712	1.30611	1.30611	1.30611	1.30611	1.30611	1.30611	0.955432	-0.120048	0.197558	-0.398356	-0.393188	-0.515764	-0.770916	-0.795479	-0.999316	-0.999316	-0.999316	-0.999316	-0.999316	-0.999316
chr1:149927615_149928115	1.30295	1.30295	1.30295	1.30295	1.30295	1.30295	0.963435	0.40898	-0.732863	-0.28746	-0.346416	-0.493704	-1.04695	-0.896841	-0.897644	-0.897644	-0.897644	-0.897644	-0.897644	-0.897644
chr11:27443591_27444091	1.1256	1.1256	1.1256	1.1256	1.1256	1.1256	0.932074	0.354061	0.672016	0.401309	0.0349601	-0.528618	-0.658287	-0.995966	-1.16085	-1.16085	-1.16085	-1.16085	-1.16085	-1.16085
chr5:134225123_134225623	1.17507	1.17507	1.17507	1.17507	1.17507	1.17507	0.574892	0.574892	0.574892	0.503605	-0.0757717	-0.883521	-1.13724	-1.16183	-1.00338	-1.00338	-1.00338	-1.00338	-1.00338	-1.00338
chr7:1041609_1042109	1.25096	1.25096	1.25096	1.25096	1.25096	1.25096	0.880348	0.27359	0.197608	0.197608	-0.332819	-0.690821	-0.843852	-0.978139	-1.03488	-1.03488	-1.03488	-1.03488	-1.03488	-1.03488
chr5:163911981_163912481	1.23496	1.23496	1.23496	1.23496	1.23496	1.23496	0.376265	0.396521	-0.298079	-0.00972199	0.147727	0.147727	-0.104255	-0.841353	-1.2041	-1.2041	-1.2041	-1.2041	-1.2041	-1.2041
chr12:31591516_31592016	1.24001	1.24001	1.24001	1.24001	1.24001	1.24001	1.07034	0.745154	-0.129207	-0.549232	-0.628966	-0.504305	-0.53486	-0.986994	-0.986994	-0.986994	-0.986994	-0.986994	-0.986994	-0.986994
chr10:109884101_109884601	1.28432	1.28432	1.28432	1.28432	1.28432	1.28432	0.425432	0.445692	0.051455	-0.169034	-0.248779	-0.0827507	-0.45034	-1.0968	-1.0968	-1.0968	-1.0968	-1.0968	-1.0968	-1.0968
chr8:27451529_27452029	1.23784	1.23784	1.23784	1.23784	1.23784	1.23784	0.911028	0.585718	0.191384	-0.321958	-0.286415	-0.519449	-0.649265	-1.20097	-1.02286	-1.02286	-1.02286	-1.02286	-1.02286	-1.02286
chr3:115783890_115784390	1.40664	1.40664	1.40664	1.40664	1.40664	1.40664	0.255952	-0.707365	-0.783388	-1.20359	-1.24405	-1.0529	-0.781439	-0.521397	-0.400275	-0.400275	-0.400275	-0.400275	-0.400275	-0.400275
chr9:35664980_35665480	1.35584	1.35584	1.35584	1.35584	1.35584	1.35584	0.406568	0.406568	0.0121263	-0.30202	-0.668881	-0.945745	-0.945745	-0.871127	-0.871127	-0.871127	-0.871127	-0.871127	-0.871127	-0.871127
chr14:90454282_90454782	1.32101	1.32101	1.32101	1.32101	1.32101	1.32101	0.730031	-0.00521703	0.0397887	-0.0205638	-0.345346	-0.622399	-0.883631	-1.20997	-0.934796	-0.934796	-0.934796	-0.934796	-0.934796	-0.934796
chr12:50111523_50112023	0.995136	0.995136	0.995136	0.995136	0.995136	0.995136	0.222086	0.69617	0.000365889	0.145694	0.53084	0.622636	0.434786	-0.296304	-1.38785	-1.38785	-1.38785	-1.38785	-1.38785	-1.38785
chr10:89701245_89701745	1.35362	1.35362	1.35362	1.35362	1.35362	1.35362	0.493025	0.513326	-0.197452	-0.628588	-0.652365	-0.929803	-0.715765	-0.546115	-0.909663	-0.909663	-0.909663	-0.909663	-0.909663	-0.909663
chr7:103148880_103149380	1.40763	1.40763	1.40763	1.40763	1.40763	1.40763	0.431882	-0.24538	-0.286688	-0.141214	-0.916661	-0.915577	-0.787508	-0.712741	-0.811982	-0.811982	-0.811982	-0.811982	-0.811982	-0.811982
chr16:87317191_87317691	1.12962	1.12962	1.12962	1.12962	1.12962	1.12962	1.02021	0.912091	0.0137032	0.571987	-0.294276	-0.802211	-1.0549	-1.10843	-1.00598	-1.00598	-1.00598	-1.00598	-1.00598	-1.00598
chr14:77181404_77181904	1.25544	1.25544	1.25544	1.25544	1.25544	1.25544	0.644182	0.318045	-0.0847243	-0.0166023	-0.0252185	-0.19586	-0.34936	-0.802818	-1.17005	-1.17005	-1.17005	-1.17005	-1.17005	-1.17005
chr22:17171317_17171817	1.3643	1.3643	1.3643	1.3643	1.3643	1.3643	0.765611	-0.0922135	-0.501381	-0.902077	-1.19856	-1.01444	-0.95105	-0.995861	-0.549307	-0.549307	-0.549307	-0.549307	-0.549307	-0.549307
chr3:13014191_13014691	1.15693	1.15693	1.15693	1.15693	1.15693	1.15693	1.08812	0.962343	-0.019269	-0.132832	-0.500918	-0.334248	-0.364926	-1.01388	-1.10433	-1.10433	-1.10433	-1.10433	-1.10433	-1.10433
chr3:136861945_136862445	1.36151	1.36151	1.36151	1.36151	1.36151	1.36151	0.0725456	0.108023	-0.896614	0.196537	-0.25246	-0.45667	-0.156305	-0.614482	-1.02827	-1.02827	-1.02827	-1.02827	-1.02827	-1.02827
chr21:45151344_45151844	1.07199	1.07199	1.07199	1.07199	1.07199	1.07199	1.00314	1.00314	0.607189	0.49357	-0.374217	-1.10017	-1.00808	-1.00808	-1.00808	-1.00808	-1.00808	-1.00808	-1.00808	-1.00808
chr11:31509449_31509949	0.8679	0.8679	0.8679	0.8679	0.8679	0.8679	0.770864	0.781851	0.551625	0.674218	0.421615	0.0900826	0.38763	-0.39021	-1.41585	-1.41585	-1.41585	-1.41585	-1.41585	-1.41585
chr6:167266444_167266944	1.3955	1.3955	1.3955	1.3955	1.3955	1.3955	0.308203	0.138468	-0.257765	-0.329475	-0.582138	-0.582138	-0.582138	-0.926571	-0.926571	-0.926571	-0.926571	-0.926571	-0.926571	-0.926571
chr22:19717891_19718391	1.28523	1.28523	1.28523	1.28523	1.28523	1.28523	0.932073	0.322068	-0.376213	-0.176626	-0.50592	-0.418526	-0.308489	-0.811436	-1.06138	-1.06138	-1.06138	-1.06138	-1.06138	-1.06138
chr6:31158264_31158764	1.0671	1.0671	1.0671	1.0671	1.0671	1.0671	0.738603	0.409667	1.04578	0.813778	-0.384282	-0.355944	-1.09132	-1.23615	-1.05712	-1.05712	-1.05712	-1.05712	-1.05712	-1.05712
chr19:33430605_33431105	1.29134	1.29134	1.29134	1.29134	1.29134	1.29134	0.96282	0.635809	-0.63649	-0.750235	-0.969762	-0.574746	-0.831803	-1.28648	-0.716197	-0.716197	-0.716197	-0.716197	-0.716197	-0.716197
chr17:82304282_82304782	1.15753	1.15753	1.15753	1.15753	1.15753	1.15753	1.08859	0.659075	0.409143	0.276738	-0.592156	-0.612812	-1.09264	-0.901247	-1.02998	-1.02998	-1.02998	-1.02998	-1.02998	-1.02998
chr11:65637814_65638314	1.27735	1.27735	1.27735	1.27735	1.27735	1.27735	0.463663	0.811278	0.0805769	-0.141268	-0.620168	-1.18037	-1.18037	-1.22533	-0.778685	-0.778685	-0.778685	-0.778685	-0.778685	-0.778685
chr8:89984037_89984537	1.27814	1.27814	1.27814	1.27814	1.27814	1.27814	0.673626	0.0628456	0.264551	0.150706	-0.432862	-0.231365	-0.776703	-0.911881	-1.07796	-1.07796	-1.07796	-1.07796	-1.07796	-1.07796
chr12:48957268_48957768	1.28673	1.28673	1.28673	1.28673	1.28673	1.28673	1.16455	0.369777	-0.583555	-0.283676	-0.581246	-0.752526	-0.808138	-0.753544	-0.915334	-0.915334	-0.915334	-0.915334	-0.915334	-0.915334
chr13:110455879_110456379	1.27071	1.27071	1.27071	1.27071	1.27071	1.27071	0.406126	0.259745	0.259745	0.0377928	-0.331312	-0.284682	-0.538393	-0.323386	-1.18499	-1.18499	-1.18499	-1.18499	-1.18499	-1.18499
chr9:93062320_93062820	1.12465	1.12465	1.12465	1.12465	1.12465	1.12465	0.510991	0.510991	0.469509	0.469509	0.216428	-0.229299	-0.260064	-0.892051	-1.25732	-1.25732	-1.25732	-1.25732	-1.25732	-1.25732
chr22:17266622_17267122	1.16383	1.16383	1.16383	1.16383	1.16383	1.16383	1.14856	0.45793	0.207662	0.236737	-0.596497	-1.00219	-1.5	-1.41754	-0.730371	-0.730371	-0.730371	-0.730371	-0.730371	-0.730371
chr9:131697836_131698336	1.05226	1.05226	1.05226	1.05226	1.05226	1.05226	1.05226	0.905784	0.340551	0.207922	-0.0453124	0.0399569	-0.440678	-0.981575	-1.23208	-1.23208	-1.23208	-1.23208	-1.23208	-1.23208
chr13:77026993_77027493	1.37216	1.37216	1.37216	1.37216	1.37216	1.37216	0.438417	-0.242174	0.0321086	-1.11556	-1.21937	-1.19861	-0.975484	-0.857608	-0.515777	-0.515777	-0.515777	-0.515777	-0.515777	-0.515777
chr19:50510631_50511131	1.20581	1.20581	1.20581	1.20581	1.20581	1.20581	1.01063	0.747186	0.34992	-0.343339	-0.8813	-0.408072	-0.767247	-1.17359	-0.961508	-0.961508	-0.961508	-0.961508	-0.961508	-0.961508
chr2:37084170_37084670	1.12847	1.12847	1.12847	1.12847	1.12847	1.12847	0.651864	0.481654	0.64807	0.553182	0.0734637	-0.418908	-0.676576	-1.20437	-1.14653	-1.14653	-1.14653	-1.14653	-1.14653	-1.14653
chr4:155376695_155377195	1.35653	1.35653	1.35653	1.35653	1.35653	1.35653	0.612793	-0.0160659	-0.246997	-0.703843	-1.09893	-1.42391	-1.1585	-0.779827	-0.553981	-0.553981	-0.553981	-0.553981	-0.553981	-0.553981
chr14:70817549_70818049	1.26994	1.26994	1.26994	1.26994	1.26994	1.26994	0.940609	0.328862	-0.692175	-0.401462	-0.251943	-0.00561799	-0.486544	-0.511351	-1.09	-1.09	-1.09	-1.09	-1.09	-1.09
chr12:93572761_93573261	1.16128	1.16128	1.16128	1.16128	1.16128	1.16128	0.831863	0.831863	0.434392	0.109099	-0.144354	-0.590734	-0.844839	-1.08499	-1.08499	-1.08499	-1.08499	-1.08499	-1.08499	-1.08499
chr17:6238140_6238640	1.17501	1.17501	1.17501	1.17501	1.17501	1.17501	0.560327	0.73842	0.326992	0.194223	-0.059281	-0.126792	-0.607936	-1.2238	-1.14203	-1.14203	-1.14203	-1.14203	-1.14203	-1.14203
chr2:33599181_33599681	1.30838	1.30838	1.30838	1.30838	1.30838	1.30838	0.57634	0.57634	-0.305605	-0.105331	-0.295991	-0.621181	-0.77556	-0.715451	-1.03064	-1.03064	-1.03064	-1.03064	-1.03064	-1.03064
chr16:84144979_84145479	1.12908	1.12908	1.12908	1.12908	1.12908	1.12908	0.786191	0.591346	0.186099	0.407506	0.0800091	-0.151099	-0.517844	-0.593971	-1.26045	-1.26045	-1.26045	-1.26045	-1.26045	-1.26045
chr15:52179698_52180198	1.29497	1.29497	1.29497	1.29497	1.29497	1.29497	0.965211	0.168287	-0.229604	-0.229604	-0.153606	-0.793002	-0.940468	-0.529177	-1.00465	-1.00465	-1.00465	-1.00465	-1.00465	-1.00465
chr16:57846336_57846836	1.22363	1.22363	1.22363	1.22363	1.22363	1.22363	0.478745	0.827503	0.429536	-0.0280164	-0.508491	-0.508491	-0.508491	-0.859695	-1.11073	-1.11073	-1.11073	-1.11073	-1.11073	-1.11073
chr3:182980376_182980876	1.27773	1.27773	1.27773	1.27773	1.27773	1.27773	0.544881	0.0300758	-1.36431	-1.5	-1.5	-0.99748	-0.466539	-0.31483	-0.315641	-0.315641	-0.315641	-0.315641	-0.315641	-0.315641
chr4:104425008_104425508	1.15038	1.15038	1.15038	1.15038	1.15038	1.15038	0.820357	0.64978	0.398751	0.176047	0.0719604	-0.473764	-0.50463	-0.933379	-1.18456	-1.18456	-1.18456	-1.18456	-1.18456	-1.18456
chr1:44029568_44030068	1.17384	1.17384	1.17384	1.17384	1.17384	1.17384	0.567047	0.748686	0.350449	-0.0173204	0.141762	-0.219972	-0.591292	-0.831909	-1.19842	-1.19842	-1.19842	-1.19842	-1.19842	-1.19842
chr1:5692098_5692598	1.1208	1.1208	1.1208	1.1208	1.1208	1.1208	0.949369	0.473765	0.473765	0.359479	0.105512	-0.341775	-0.596397	-1.05323	-1.18255	-1.18255	-1.18255	-1.18255	-1.18255	-1.18255
chr12:101279825_101280325	1.22314	1.22314	1.22314	1.22314	1.22314	1.22314	1.15558	0.826998	-0.129911	-0.31514	-0.901009	-0.968649	-0.895881	-0.849431	-0.876905	-0.876905	-0.876905	-0.876905	-0.876905	-0.876905
chr2:44949110_44949610	1.24652	1.24652	1.24652	1.24652	1.24652	1.24652	1.14894	0.588176	-0.295401	-0.172128	-0.542612	-0.639699	-0.779529	-0.920396	-0.97774	-0.97774	-0.97774	-0.97774	-0.97774	-0.97774
chr7:31052113_31052613	1.31631	1.31631	1.31631	1.31631	1.31631	1.31631	0.399641	0.135449	0.0586444	0.299397	-0.386677	-0.622111	-0.622111	-0.752171	-1.06798	-1.06798	-1.06798	-1.06798	-1.06798	-1.06798
chr4:2423234_2423734	1.33565	1.33565	1.33565	1.33565	1.33565	1.33565	0.719636	0.243874	-0.490048	-0.421396	-0.254076	-0.375049	-0.529742	-0.986725	-0.986725	-0.986725	-0.986725	-0.986725	-0.986725	-0.986725
chr19:42352082_42352582	1.21534	1.21534	1.21534	1.21534	1.21534	1.21534	1.04383	1.04383	-0.235045	-0.561138	-0.561138	-0.561138	-0.932652	-0.932652	-0.932652	-0.932652	-0.932652	-0.932652	-0.932652	-0.932652
chr1:145721147_145721647	1.31344	1.31344	1.31344	1.31344	1.31344	1.31344	0.983168	0.118526	0.118526	-0.490404	-0.861047	-0.861047	-0.861047	-0.861047	-0.861047	-0.861047	-0.861047	-0.861047	-0.861047	-0.861047
chr1:169485833_169486333	1.27533	1.27533	1.27533	1.27533	1.27533	1.27533	0.578821	0.354977	-0.0794192	0.0439112	-0.49836	-0.80998	-0.319646	-0.100922	-1.13689	-1.13689	-1.13689	-1.13689	-1.13689	-1.13689
chr13:113448661_113449161	1.29109	1.29109	1.29109	1.29109	1.29109	1.29109	0.960766	0.095998	-0.47128	-0.472307	-0.182232	-0.0908777	-0.462503	-0.703319	-1.07013	-1.07013	-1.07013	-1.07013	-1.07013	-1.07013
chr10:44180134_44180634	1.24471	1.24471	1.24471	1.24471	1.24471	1.24471	0.91439	0.585589	0.187022	-0.0358874	-0.722256	-0.722256	-0.98072	-1.22154	-0.912103	-0.912103	-0.912103	-0.912103	-0.912103	-0.912103
chr15:72226625_72227125	1.20631	1.20631	1.20631	1.20631	1.20631	1.20631	0.590042	0.261233	0.58297	0.309043	-0.172168	-0.293191	-0.664827	-0.906061	-1.15748	-1.15748	-1.15748	-1.15748	-1.15748	-1.15748
chr3:128317849_128318349	1.27003	1.27003	1.27003	1.27003	1.27003	1.27003	0.401551	0.137198	0.304158	-0.120616	0.0467998	-0.252414	-0.507266	-0.507266	-1.18705	-1.18705	-1.18705	-1.18705	-1.18705	-1.18705
chr10:24951711_24952211	1.31938	1.31938	1.31938	1.31938	1.31938	1.31938	0.702947	0.576244	-0.412628	-0.343929	-0.343929	-0.984602	-0.760624	-0.796153	-0.925605	-0.925605	-0.925605	-0.925605	-0.925605	-0.925605
chr1:23368140_23368640	1.31366	1.31366	1.31366	1.31366	1.31366	1.31366	0.828347	0.632978	-0.523313	-0.650855	-0.81776	-1.12564	-1.04389	-0.73914	-0.740453	-0.740453	-0.740453	-0.740453	-0.740453	-0.740453
chr7:124032755_124033255	1.17194	1.17194	1.17194	1.17194	1.17194	1.17194	0.693479	0.693479	0.693479	0.174215	-0.362613	-0.539112	-0.794121	-1.03513	-1.09255	-1.09255	-1.09255	-1.09255	-1.09255	-1.09255
chr19:40570555_40571055	0.938571	0.938571	0.938571	0.938571	0.938571	0.938571	0.938571	0.829453	0.0945958	0.872204	0.212269	0.259143	-0.392989	-0.317523	-1.35453	-1.35453	-1.35453	-1.35453	-1.35453	-1.35453
chr22:41832660_41833160	1.29656	1.29656	1.29656	1.29656	1.29656	1.29656	0.515278	0.0958377	0.112551	-0.796656	-0.503146	-0.132035	0.244535	-0.929952	-1.0643	-1.0643	-1.0643	-1.0643	-1.0643	-1.0643
chr1:228165890_228166390	1.26382	1.26382	1.26382	1.26382	1.26382	1.26382	1.10205	-0.377965	0.168905	0.0197436	-0.0466626	-0.647466	-0.997356	-0.952584	-0.97526	-0.97526	-0.97526	-0.97526	-0.97526	-0.97526
chr17:57916050_57916550	1.28782	1.28782	1.28782	1.28782	1.28782	1.28782	0.809079	0.479821	0.0807008	-0.344586	-0.485793	-0.553571	-0.808731	-1.15567	-0.95803	-0.95803	-0.95803	-0.95803	-0.95803	-0.95803
chr4:176320321_176320821	1.26707	1.26707	1.26707	1.26707	1.26707	1.26707	1.26707	0.285415	-0.127734	-0.55312	-0.807683	-0.957884	-0.530675	-0.666694	-0.918518	-0.918518	-0.918518	-0.918518	-0.918518	-0.918518
chr3:11770337_11770837	1.32164	1.32164	1.32164	1.32164	1.32164	1.32164	0.451651	0.122217	0.122217	-0.101122	-0.0651289	-0.444232	-0.927536	-0.835232	-1.04211	-1.04211	-1.04211	-1.04211	-1.04211	-1.04211
chr1:109492917_109493417	1.26383	1.26383	1.26383	1.26383	1.26383	1.26383	1.19437	0.180463	-0.218979	-0.4935	-0.4935	-0.4935	-0.4935	-0.382556	-1.06371	-1.06371	-1.06371	-1.06371	-1.06371	-1.06371
chr6:33694376_33694876	1.36632	1.36632	1.36632	1.36632	1.36632	1.36632	0.446718	0.0520323	-0.180247	-0.639761	-0.44685	-1.48614	-0.957743	-1.20039	-0.630925	-0.630925	-0.630925	-0.630925	-0.630925	-0.630925
chr12:110270096_110270596	1.2603	1.2603	1.2603	1.2603	1.2603	1.2603	1.2603	0.393125	-0.343128	-0.457815	-0.307428	-0.949692	-0.894648	-0.894648	-0.894648	-0.894648	-0.894648	-0.894648	-0.894648	-0.894648
chr15:68817981_68818481	1.21645	1.21645	1.21645	1.21645	1.21645	1.21645	0.885184	0.555442	0.155736	0.155736	-0.326839	-0.563048	-0.820513	-0.648852	-1.11526	-1.11526	-1.11526	-1.11526	-1.11526	-1.11526
chr5:74316127_74316627	1.37407	1.37407	1.37407	1.37407	1.37407	1.37407	0.503116	0.208064	-0.205668	-0.532848	-1.01551	-1.25176	-0.893957	-0.722265	-0.722265	-0.722265	-0.722265	-0.722265	-0.722265	-0.722265
chr4:2962727_2963227	1.31899	1.31899	1.31899	1.31899	1.31899	1.31899	0.835631	0.358091	-0.0557687	-0.38305	-0.865858	-0.818869	-0.646583	-0.994204	-0.890553	-0.890553	-0.890553	-0.890553	-0.890553	-0.890553
chr2:38377086_38377586	1.2911	1.2911	1.2911	1.2911	1.2911	1.2911	0.807663	0.6461	-0.587516	-0.386051	-0.623517	-0.274872	-0.535815	-0.690198	-1.01707	-1.01707	-1.01707	-1.01707	-1.01707	-1.01707
chr15:40010684_40011184	1.21889	1.21889	1.21889	1.21889	1.21889	1.21889	0.874095	0.25833	0.18122	-0.0424796	-0.297532	-0.250534	-0.281538	-0.523208	-1.20528	-1.20528	-1.20528	-1.20528	-1.20528	-1.20528
chr6:30075239_30075739	1.2829	1.2829	1.2829	1.2829	1.2829	1.2829	0.95139	0.621405	-0.406393	-0.733758	-0.583249	-0.414793	-0.414793	-0.959602	-0.959602	-0.959602	-0.959602	-0.959602	-0.959602	-0.959602
chr17:7219627_7220127	0.969349	0.969349	0.969349	0.969349	0.969349	0.969349	0.899759	0.920327	0.687723	0.282097	0.379254	0.0816769	-0.402711	-0.922024	-1.29037	-1.29037	-1.29037	-1.29037	-1.29037	-1.29037
chr5:61162316_61162816	1.04292	1.04292	1.04292	1.04292	1.04292	1.04292	0.774271	0.664739	0.104054	0.65782	0.32504	-0.0551069	-0.0993182	-0.785487	-1.30725	-1.30725	-1.30725	-1.30725	-1.30725	-1.30725
chr7:13920112_13920612	1.28356	1.28356	1.28356	1.28356	1.28356	1.28356	0.951669	0.0827857	0.0827857	-0.141185	-0.333217	-0.569873	-0.569873	-1.02921	-1.02921	-1.02921	-1.02921	-1.02921	-1.02921	-1.02921
chr13:108788060_108788560	1.12083	1.12083	1.12083	1.12083	1.12083	1.12083	0.501634	0.171265	0.494528	0.563535	0.59963	-0.221604	-0.477625	-1.11531	-1.20683	-1.20683	-1.20683	-1.20683	-1.20683	-1.20683
chr9:34988674_34989174	1.1935	1.1935	1.1935	1.1935	1.1935	1.1935	1.02113	1.02113	-0.139915	-0.139915	-0.395285	-0.759053	-0.759053	-1.00144	-1.00144	-1.00144	-1.00144	-1.00144	-1.00144	-1.00144
chr21:29073558_29074058	1.25429	1.25429	1.25429	1.25429	1.25429	1.25429	1.00059	0.522343	-0.638753	-0.54847	-0.0655459	-0.0369127	-0.94638	-0.774379	-1.00637	-1.00637	-1.00637	-1.00637	-1.00637	-1.00637
chr3:136250057_136250557	1.36035	1.36035	1.36035	1.36035	1.36035	1.36035	0.74577	-0.0565156	-0.471067	-0.931612	-1.29388	-0.946863	-0.228763	-0.977866	-0.666879	-0.666879	-0.666879	-0.666879	-0.666879	-0.666879
chr6:31902101_31902601	1.3253	1.3253	1.3253	1.3253	1.3253	1.3253	0.832125	-0.654296	-0.377519	-0.842264	-0.643947	-0.0184732	0.0747447	-0.348981	-0.995536	-0.995536	-0.995536	-0.995536	-0.995536	-0.995536
chr19:3285145_3285645	1.05618	1.05618	1.05618	1.05618	1.05618	1.05618	1.05618	0.725544	0.32475	0.0513723	-0.403127	-0.349864	0.304308	-0.256429	-1.2983	-1.2983	-1.2983	-1.2983	-1.2983	-1.2983
chr7:104328126_104328626	1.2073	1.2073	1.2073	1.2073	1.2073	1.2073	0.849927	0.519141	0.309295	0.132823	-0.165142	-0.615455	-0.631868	-1.09179	-1.09179	-1.09179	-1.09179	-1.09179	-1.09179	-1.09179
chr10:72319499_72319999	1.3717	1.3717	1.3717	1.3717	1.3717	1.3717	0.760672	-0.188513	-0.603528	-0.603528	-0.859241	-0.690358	-0.075076	-0.636123	-0.889084	-0.889084	-0.889084	-0.889084	-0.889084	-0.889084
chr7:129774276_129774776	1.01606	1.01606	1.01606	1.01606	1.01606	1.01606	0.762009	0.545196	0.545196	0.820647	0.33644	0.017422	-0.747904	-1.5	-1.11731	-1.11731	-1.11731	-1.11731	-1.11731	-1.11731
chr6:108002865_108003365	1.35091	1.35091	1.35091	1.35091	1.35091	1.35091	0.612441	0.281553	-0.119544	-0.546937	-0.371167	-0.735499	-0.76659	-0.705952	-0.958964	-0.958964	-0.958964	-0.958964	-0.958964	-0.958964
chr12:120234703_120235203	1.22229	1.22229	1.22229	1.22229	1.22229	1.22229	0.984962	1.00558	-0.0251679	-0.673543	-0.7784	-0.689922	-0.756977	-1.19743	-0.867142	-0.867142	-0.867142	-0.867142	-0.867142	-0.867142
chr9:133742917_133743417	1.16184	1.16184	1.16184	1.16184	1.16184	1.16184	1.09207	0.474278	0.0729814	0.0729814	-0.149258	-0.386407	-0.29307	-0.535535	-1.21985	-1.21985	-1.21985	-1.21985	-1.21985	-1.21985
chr10:78292674_78293174	1.25321	1.25321	1.25321	1.25321	1.25321	1.25321	0.920505	0.58933	0.187885	-0.334713	-0.5907	-0.504504	-0.76115	-1.0037	-1.0037	-1.0037	-1.0037	-1.0037	-1.0037	-1.0037
chr4:165378814_165379314	1.27346	1.27346	1.27346	1.27346	1.27346	1.27346	0.554784	-0.0634721	0.268763	-0.196926	0.0964954	-0.185392	-0.442135	-0.684782	-1.16468	-1.16468	-1.16468	-1.16468	-1.16468	-1.16468
chr9:92764701_92765201	1.32505	1.32505	1.32505	1.32505	1.32505	1.32505	0.730732	-0.315879	-0.128871	-0.799639	-0.32985	0.239792	-0.528813	-0.69694	-1.02014	-1.02014	-1.02014	-1.02014	-1.02014	-1.02014
chr5:123809477_123809977	1.13123	1.13123	1.13123	1.13123	1.13123	1.13123	0.958275	0.958275	0.218062	-0.00667105	0.0809778	-0.743041	-0.64958	-0.674666	-1.15484	-1.15484	-1.15484	-1.15484	-1.15484	-1.15484
chr14:24062128_24062628	1.32082	1.32082	1.32082	1.32082	1.32082	1.32082	0.704269	0.372755	-0.204962	-0.135717	-0.82775	-1.27905	-1.0533	-1.0533	-0.74131	-0.74131	-0.74131	-0.74131	-0.74131	-0.74131
chr4:10461215_10461715	1.16344	1.16344	1.16344	1.16344	1.16344	1.16344	0.830269	0.310336	0.514717	0.194547	0.00177517	-0.0962058	-0.688927	-0.932237	-1.18582	-1.18582	-1.18582	-1.18582	-1.18582	-1.18582
chr19:35269346_35269846	1.22416	1.22416	1.22416	1.22416	1.22416	1.22416	0.741939	0.261863	-0.478713	-0.150762	0.267328	-0.209399	-0.0361979	-0.477615	-1.21057	-1.21057	-1.21057	-1.21057	-1.21057	-1.21057
chr1:8878518_8879018	0.940582	0.940582	0.940582	0.940582	0.940582	0.940582	0.331731	0.643331	0.689204	0.664904	0.771537	0.504283	-0.408772	-1.01574	-1.30399	-1.30399	-1.30399	-1.30399	-1.30399	-1.30399
chr3:126357246_126357746	1.1156	1.1156	1.1156	1.1156	1.1156	1.1156	0.506523	0.239792	0.285682	0.455125	0.341005	0.403726	-0.363825	-1.02338	-1.25637	-1.25637	-1.25637	-1.25637	-1.25637	-1.25637
chr20:37890555_37891055	1.35591	1.35591	1.35591	1.35591	1.35591	1.35591	0.742795	-0.00719546	-0.442351	-0.442351	-0.574466	-0.696644	-0.266043	-0.509165	-0.990002	-0.990002	-0.990002	-0.990002	-0.990002	-0.990002
chr19:55353752_55354252	1.09666	1.09666	1.09666	1.09666	1.09666	1.09666	0.355461	0.366626	0.395121	0.689643	-0.100219	0.372939	-0.0805274	-0.789546	-1.29824	-1.29824	-1.29824	-1.29824	-1.29824	-1.29824
chr5:1702250_1702750	1.16201	1.16201	1.16201	1.16201	1.16201	1.16201	1.09201	0.472227	0.238252	0.0130921	-0.119091	-0.357004	-0.357004	-0.81878	-1.18929	-1.18929	-1.18929	-1.18929	-1.18929	-1.18929
chr15:36579400_36579900	1.27916	1.27916	1.27916	1.27916	1.27916	1.27916	0.401382	0.401382	0.401382	0.176043	-0.502456	-0.763907	-0.763907	-0.59087	-1.07234	-1.07234	-1.07234	-1.07234	-1.07234	-1.07234
chr1:115840885_115841385	1.19955	1.19955	1.19955	1.19955	1.19955	1.19955	0.716253	0.567636	0.356772	0.356772	-0.23588	-0.583849	-0.841436	-0.841436	-1.11536	-1.11536	-1.11536	-1.11536	-1.11536	-1.11536
chr5:139341531_139342031	1.36259	1.36259	1.36259	1.36259	1.36259	1.36259	0.641519	0.204988	-0.212012	-1.02432	-0.83521	-0.985195	-0.873299	-1.11751	-0.662413	-0.662413	-0.662413	-0.662413	-0.662413	-0.662413
chr10:45445449_45445949	1.15366	1.15366	1.15366	1.15366	1.15366	1.15366	0.670331	0.670331	0.59265	0.163292	0.0579667	-0.680794	-0.454426	-0.916606	-1.17078	-1.17078	-1.17078	-1.17078	-1.17078	-1.17078
chr11:130314689_130315189	1.33084	1.33084	1.33084	1.33084	1.33084	1.33084	0.403348	0.224141	-0.0969501	-0.322396	-0.139155	-0.459798	-0.283774	-0.750235	-1.09337	-1.09337	-1.09337	-1.09337	-1.09337	-1.09337
chr17:28576700_28577200	1.19781	1.19781	1.19781	1.19781	1.19781	1.19781	1.12771	0.379105	-0.0240127	0.10074	-0.27419	-0.594847	-0.35221	-0.596536	-1.15877	-1.15877	-1.15877	-1.15877	-1.15877	-1.15877
chr11:118078983_118079483	1.20093	1.20093	1.20093	1.20093	1.20093	1.20093	0.446196	0.799566	0.219874	-0.00564339	0.0307011	-0.20759	-0.465376	-1.1965	-1.1378	-1.1378	-1.1378	-1.1378	-1.1378	-1.1378
chr10:55410586_55411086	1.34439	1.34439	1.34439	1.34439	1.34439	1.34439	0.72971	0.108663	0.108663	-0.507759	-1.10114	-0.931244	-0.931244	-0.712685	-0.804881	-0.804881	-0.804881	-0.804881	-0.804881	-0.804881
chr11:64317855_64318355	1.43285	1.43285	1.43285	1.43285	1.43285	1.43285	0.255367	-0.266536	-0.552945	-0.554706	-0.822835	-0.627234	-0.408586	-0.406642	-0.868829	-0.868829	-0.868829	-0.868829	-0.868829	-0.868829
chr14:21476845_21477345	1.3834	1.3834	1.3834	1.3834	1.3834	1.3834	0.473101	0.108376	-0.602829	-1.30709	-1.08526	-0.346341	-0.441239	-0.778796	-0.72005	-0.72005	-0.72005	-0.72005	-0.72005	-0.72005
chr17:28552437_28552937	1.1236	1.1236	1.1236	1.1236	1.1236	1.1236	0.499331	0.520079	0.845992	0.0572043	0.0484048	-0.125868	-0.282634	-0.735365	-1.26145	-1.26145	-1.26145	-1.26145	-1.26145	-1.26145
chr5:1445245_1445745	1.29712	1.29712	1.29712	1.29712	1.29712	1.29712	0.681887	0.346803	-0.0569716	-0.332383	0.0754879	-0.578106	-0.839946	-0.987482	-1.01533	-1.01533	-1.01533	-1.01533	-1.01533	-1.01533
chr7:106660952_106661452	1.2786	1.2786	1.2786	1.2786	1.2786	1.2786	0.398932	0.225964	0.456513	0.0472906	-0.146332	-0.527678	-0.584266	-1.02761	-1.08574	-1.08574	-1.08574	-1.08574	-1.08574	-1.08574
chr12:93570712_93571212	0.930806	0.930806	0.930806	0.930806	0.930806	0.930806	0.930806	0.930806	0.852963	0.718111	0.219751	-0.0422679	-0.739248	-1.09559	-1.2267	-1.2267	-1.2267	-1.2267	-1.2267	-1.2267
chr12:88141935_88142435	1.36932	1.36932	1.36932	1.36932	1.36932	1.36932	0.884985	-0.612571	-0.351745	-0.87739	-0.58237	-0.456508	-0.259872	-0.772399	-0.86468	-0.86468	-0.86468	-0.86468	-0.86468	-0.86468
chr11:124622576_124623076	1.34714	1.34714	1.34714	1.34714	1.34714	1.34714	0.85904	0.0037145	-0.407698	-0.237582	-0.431225	-0.918564	-0.744588	-0.651247	-0.925781	-0.925781	-0.925781	-0.925781	-0.925781	-0.925781
chr4:25312449_25312949	1.34587	1.34587	1.34587	1.34587	1.34587	1.34587	0.734341	-0.369522	0.239636	-0.377446	-0.312437	-0.802513	-0.859109	-0.685671	-0.940415	-0.940415	-0.940415	-0.940415	-0.940415	-0.940415
chr12:6821512_6822012	1.29635	1.29635	1.29635	1.29635	1.29635	1.29635	0.324333	0.649119	0.0792435	-0.446543	-0.348497	-0.595052	-0.351948	-0.422324	-1.11107	-1.11107	-1.11107	-1.11107	-1.11107	-1.11107
chr19:50909299_50909799	1.09294	1.09294	1.09294	1.09294	1.09294	1.09294	0.758081	0.778844	0.213112	0.77473	-0.110773	-0.336615	-0.381224	-1.22952	-1.17071	-1.17071	-1.17071	-1.17071	-1.17071	-1.17071
chr4:56055577_56056077	0.965946	0.965946	0.965946	0.965946	0.965946	0.965946	0.965946	0.965946	0.547723	0.117114	0.411228	0.0730201	-0.0962473	-1.10934	-1.27851	-1.27851	-1.27851	-1.27851	-1.27851	-1.27851
chr19:15449771_15450271	1.05108	1.05108	1.05108	1.05108	1.05108	1.05108	0.795066	0.684516	0.429736	0.241789	-0.0940819	0.0604661	-0.0893191	-0.227021	-1.35127	-1.35127	-1.35127	-1.35127	-1.35127	-1.35127
chr19:40690572_40691072	1.22933	1.22933	1.22933	1.22933	1.22933	1.22933	1.06185	0.546895	-0.018997	0.0106027	-0.581009	-0.54007	-0.650011	-1.20778	-0.999576	-0.999576	-0.999576	-0.999576	-0.999576	-0.999576
chr8:11765341_11765841	1.2871	1.2871	1.2871	1.2871	1.2871	1.2871	1.067	0.313693	-0.090469	-0.555145	-0.555145	-1.04561	-1.30399	-0.793279	-0.793279	-0.793279	-0.793279	-0.793279	-0.793279	-0.793279
chr3:111674321_111674821	1.23615	1.23615	1.23615	1.23615	1.23615	1.23615	1.13712	0.337658	0.202731	-0.323595	-0.867723	-0.517467	-0.667311	-0.400697	-1.05294	-1.05294	-1.05294	-1.05294	-1.05294	-1.05294
chr8:53657611_53658111	1.17351	1.17351	1.17351	1.17351	1.17351	1.17351	0.876144	0.577592	0.0150107	0.140197	-0.359067	-0.234485	-0.265841	-0.34326	-1.24122	-1.24122	-1.24122	-1.24122	-1.24122	-1.24122
chr1:89524562_89525062	1.19797	1.19797	1.19797	1.19797	1.19797	1.19797	0.941713	0.952932	0.240028	-0.169963	-1.14562	-1.01952	-0.980293	-1.04326	-0.827303	-0.827303	-0.827303	-0.827303	-0.827303	-0.827303
chr1:223516048_223516548	1.25299	1.25299	1.25299	1.25299	1.25299	1.25299	0.767636	0.368051	0.290044	-0.0322184	-0.256306	-0.459902	-0.832975	-0.832975	-1.08822	-1.08822	-1.08822	-1.08822	-1.08822	-1.08822
chr12:31728902_31729402	1.3484	1.3484	1.3484	1.3484	1.3484	1.3484	0.502857	0.193537	0.0353371	-1.03711	-1.42619	-1.03258	-0.415986	-0.773155	-0.689519	-0.689519	-0.689519	-0.689519	-0.689519	-0.689519
chr12:120093884_120094384	0.992089	0.992089	0.992089	0.992089	0.992089	0.992089	0.992089	0.992089	0.587346	0.514096	0.111661	-0.0674299	-0.729082	-1.19333	-1.19333	-1.19333	-1.19333	-1.19333	-1.19333	-1.19333
chr20:10673831_10674331	1.09764	1.09764	1.09764	1.09764	1.09764	1.09764	0.898709	0.725259	0.6472	0.177678	-0.125955	-0.254502	-0.617444	-0.642722	-1.23234	-1.23234	-1.23234	-1.23234	-1.23234	-1.23234
chr10:74150852_74151352	1.30317	1.30317	1.30317	1.30317	1.30317	1.30317	0.685986	0.440899	0.153408	-0.998621	-1.23911	-0.944121	-0.217982	-0.72159	-0.829644	-0.829644	-0.829644	-0.829644	-0.829644	-0.829644
chr8:11452173_11452673	1.26571	1.26571	1.26571	1.26571	1.26571	1.26571	1.26571	0.269642	-0.135434	-0.466951	-0.661195	-0.900577	-0.67301	-0.579379	-0.95218	-0.95218	-0.95218	-0.95218	-0.95218	-0.95218
chr4:41214378_41214878	1.19239	1.19239	1.19239	1.19239	1.19239	1.19239	0.83135	0.497172	0.525844	0.215648	-1.00522	-1.28972	-1.17723	-1.42275	-0.721571	-0.721571	-0.721571	-0.721571	-0.721571	-0.721571
chr11:65873420_65873920	1.20145	1.20145	1.20145	1.20145	1.20145	1.20145	0.903673	0.567499	0.388743	-0.164921	-0.0997115	-0.444672	-0.80778	-0.964139	-1.0979	-1.0979	-1.0979	-1.0979	-1.0979	-1.0979
chr19:38256329_38256829	1.19675	1.19675	1.19675	1.19675	1.19675	1.19675	0.860939	0.860939	0.455753	-0.163382	-0.540236	-0.766719	-0.900107	-0.852855	-1.02247	-1.02247	-1.02247	-1.02247	-1.02247	-1.02247
chr1:28860700_28861200	1.0256	1.0256	1.0256	1.0256	1.0256	1.0256	1.0256	0.691318	0.691318	0.464693	-0.233118	-0.0624679	-0.321521	-0.786304	-1.27052	-1.27052	-1.27052	-1.27052	-1.27052	-1.27052
chr16:66315151_66315651	1.32856	1.32856	1.32856	1.32856	1.32856	1.32856	0.70171	0.0775671	-0.964161	-1.29596	-0.999746	-1.28432	-1.05656	-0.130169	-0.503289	-0.503289	-0.503289	-0.503289	-0.503289	-0.503289
chr3:84967742_84968242	1.32617	1.32617	1.32617	1.32617	1.32617	1.32617	0.699167	0.0748712	-0.33065	-0.0339737	-0.0339737	-0.589732	-0.967842	-0.967842	-0.967842	-0.967842	-0.967842	-0.967842	-0.967842	-0.967842
chr6:84260144_84260644	1.3035	1.3035	1.3035	1.3035	1.3035	1.3035	0.675875	0.104428	0.219659	-0.0117994	-0.41541	-0.43656	-0.909188	-1.05751	-0.99842	-0.99842	-0.99842	-0.99842	-0.99842	-0.99842
chr17:81409592_81410092	1.20647	1.20647	1.20647	1.20647	1.20647	1.20647	0.869865	0.468783	0.195513	0.195513	-0.401893	-0.195618	-0.574314	-1.11381	-1.11381	-1.11381	-1.11381	-1.11381	-1.11381	-1.11381
chr22:31290547_31291047	1.17419	1.17419	1.17419	1.17419	1.17419	1.17419	1.04913	0.1678	0.0894913	0.0542264	-0.140555	-0.458177	0.031334	-0.414667	-1.23729	-1.23729	-1.23729	-1.23729	-1.23729	-1.23729
chr6:157465980_157466480	1.25252	1.25252	1.25252	1.25252	1.25252	1.25252	0.870457	0.244942	-0.161371	0.289875	-0.409834	-0.409834	-0.409834	-0.855962	-1.11226	-1.11226	-1.11226	-1.11226	-1.11226	-1.11226
chr3:58491663_58492163	1.3294	1.3294	1.3294	1.3294	1.3294	1.3294	1.10809	-0.734145	0.0546329	-0.696101	-0.887734	-1.05975	-0.551502	-0.539542	-0.778393	-0.778393	-0.778393	-0.778393	-0.778393	-0.778393
chr7:54116972_54117472	1.35507	1.35507	1.35507	1.35507	1.35507	1.35507	0.726603	0.100852	-0.483492	-0.619239	-0.320591	-0.447219	-0.478726	-0.724315	-0.980714	-0.980714	-0.980714	-0.980714	-0.980714	-0.980714
chr4:150591445_150591945	1.22378	1.22378	1.22378	1.22378	1.22378	1.22378	0.736139	0.736139	-0.0127511	-0.148521	-0.148521	-0.271961	-0.531862	-0.880381	-1.13682	-1.13682	-1.13682	-1.13682	-1.13682	-1.13682
chr1:115677154_115677654	1.07178	1.07178	1.07178	1.07178	1.07178	1.07178	1.07178	0.736394	0.329847	0.150921	-0.044028	0.00374166	-0.259897	-0.926539	-1.24881	-1.24881	-1.24881	-1.24881	-1.24881	-1.24881
chr10:14240209_14240709	1.27846	1.27846	1.27846	1.27846	1.27846	1.27846	0.91612	0.43064	-0.153822	-0.381196	-0.203037	-0.443289	-0.709979	-1.06876	-1.00958	-1.00958	-1.00958	-1.00958	-1.00958	-1.00958
chr13:67230177_67230677	1.29972	1.29972	1.29972	1.29972	1.29972	1.29972	0.901353	-0.417232	0.267238	-0.144799	-1.07777	-1.20442	-1.2824	-1.08614	-0.625693	-0.625693	-0.625693	-0.625693	-0.625693	-0.625693
chr12:82688530_82689030	1.20492	1.20492	1.20492	1.20492	1.20492	1.20492	0.854442	0.519033	0.519033	0.0858014	-0.405068	-0.645336	-1.2448	-0.767689	-1.02416	-1.02416	-1.02416	-1.02416	-1.02416	-1.02416
chr10:118754303_118754803	1.14827	1.14827	1.14827	1.14827	1.14827	1.14827	1.07757	0.505187	0.346258	0.0135004	-0.0687441	-0.309021	-0.466891	-0.820327	-1.19452	-1.19452	-1.19452	-1.19452	-1.19452	-1.19452
chr7:74067777_74068277	1.08926	1.08926	1.08926	1.08926	1.08926	1.08926	1.05146	0.781812	0.350344	-0.0829438	0.213	-0.269189	-0.403052	-0.75165	-1.23756	-1.23756	-1.23756	-1.23756	-1.23756	-1.23756
chr1:227914390_227914890	1.33924	1.33924	1.33924	1.33924	1.33924	1.33924	0.578053	0.598952	-0.445991	-0.50821	-0.699985	-0.688219	-1.28782	-0.684275	-0.81632	-0.81632	-0.81632	-0.81632	-0.81632	-0.81632
chr6:26595683_26596183	1.35924	1.35924	1.35924	1.35924	1.35924	1.35924	0.73041	0.104295	-0.310052	-0.310052	-0.569392	-0.809736	-0.866733	-0.598541	-0.92094	-0.92094	-0.92094	-0.92094	-0.92094	-0.92094
chr10:614863_615363	1.28796	1.28796	1.28796	1.28796	1.28796	1.28796	0.950874	0.465175	0.0584441	-0.736169	-0.583128	-1.14054	-0.965315	-1.01141	-0.794284	-0.794284	-0.794284	-0.794284	-0.794284	-0.794284
chrX:71118368_71118868	1.23326	1.23326	1.23326	1.23326	1.23326	1.23326	0.603973	0.624888	0.624888	-0.17024	-0.365404	-1.01943	-0.790783	-1.25761	-0.941636	-0.941636	-0.941636	-0.941636	-0.941636	-0.941636
chr14:24114472_24114972	1.14302	1.14302	1.14302	1.14302	1.14302	1.14302	1.07397	0.21167	0.370306	0.0182523	-0.152117	-0.836162	0.0692636	-0.250378	-1.22716	-1.22716	-1.22716	-1.22716	-1.22716	-1.22716
chr14:96741387_96741887	1.2962	1.2962	1.2962	1.2962	1.2962	1.2962	0.80782	0.633405	-0.218339	-0.652188	-1.14376	-1.29695	-0.861237	-0.861237	-0.697455	-0.697455	-0.697455	-0.697455	-0.697455	-0.697455
chr15:76311230_76311730	1.28019	1.28019	1.28019	1.28019	1.28019	1.28019	1.05832	0.431103	-0.61575	-0.713044	-0.282147	-0.319227	-0.583429	-0.629607	-1.00456	-1.00456	-1.00456	-1.00456	-1.00456	-1.00456
chr11:22491799_22492299	1.27924	1.27924	1.27924	1.27924	1.27924	1.27924	0.941475	0.45481	0.047269	-0.38699	-0.646865	-0.475233	-0.735776	-0.982015	-0.982015	-0.982015	-0.982015	-0.982015	-0.982015	-0.982015
chr10:58967540_58968040	1.15923	1.15923	1.15923	1.15923	1.15923	1.15923	0.918037	1.09782	0.193537	-0.0344652	-0.526656	-0.595886	-0.595886	-0.945378	-1.07775	-1.07775	-1.07775	-1.07775	-1.07775	-1.07775
chr7:77122244_77122744	1.30117	1.30117	1.30117	1.30117	1.30117	1.30117	0.580479	0.399215	-0.92122	-1.03693	-0.737354	-1.26131	-1.5	-1.04065	-0.37566	-0.37566	-0.37566	-0.37566	-0.37566	-0.37566
chr15:31308126_31308626	1.2671	1.2671	1.2671	1.2671	1.2671	1.2671	0.929134	0.592727	-0.158466	-0.158466	-0.650797	-0.521833	-0.782533	-1.25027	-0.93368	-0.93368	-0.93368	-0.93368	-0.93368	-0.93368
chr1:115922695_115923195	1.17036	1.17036	1.17036	1.17036	1.17036	1.17036	0.948216	0.727703	0.438192	0.00354958	-0.192049	-0.544319	-1.02815	-1.05361	-1.05361	-1.05361	-1.05361	-1.05361	-1.05361	-1.05361
chr4:25160791_25161291	1.22451	1.22451	1.22451	1.22451	1.22451	1.22451	0.88639	0.711624	0.303648	-0.131075	-0.510523	-0.968702	-0.739505	-0.764974	-1.02232	-1.02232	-1.02232	-1.02232	-1.02232	-1.02232
chr3:143972501_143973001	1.11342	1.11342	1.11342	1.11342	1.11342	1.11342	1.11342	0.776815	0.0251885	0.0954962	0.147542	-0.158715	-0.760307	-0.806552	-1.18556	-1.18556	-1.18556	-1.18556	-1.18556	-1.18556
chr7:30594654_30595154	1.29758	1.29758	1.29758	1.29758	1.29758	1.29758	0.57634	0.425837	0.00356042	-0.186192	-0.149414	-0.455679	-0.828058	-1.29608	-0.979296	-0.979296	-0.979296	-0.979296	-0.979296	-0.979296
chr3:169147422_169147922	0.833683	0.833683	0.833683	0.833683	0.833683	0.833683	0.833683	0.833683	0.833683	0.716585	0.716585	0.364158	-0.340234	-1.28003	-1.28003	-1.28003	-1.28003	-1.28003	-1.28003	-1.28003
chr15:77565019_77565519	1.13979	1.13979	1.13979	1.13979	1.13979	1.13979	0.64642	0.64642	0.343464	-0.125833	0.298662	-0.185368	-0.242573	-0.588053	-1.27198	-1.27198	-1.27198	-1.27198	-1.27198	-1.27198
chr2:6639750_6640250	1.09552	1.09552	1.09552	1.09552	1.09552	1.09552	0.464202	0.464202	0.464202	0.390306	0.390306	0.236683	-0.350402	-1.37401	-1.20977	-1.20977	-1.20977	-1.20977	-1.20977	-1.20977
chr10:132410619_132411119	1.37584	1.37584	1.37584	1.37584	1.37584	1.37584	0.610907	-0.0182489	-0.0182489	-0.662064	-0.662064	-0.662064	-0.662064	-0.662064	-0.919858	-0.919858	-0.919858	-0.919858	-0.919858	-0.919858
chr11:30635320_30635820	0.973156	0.973156	0.973156	0.973156	0.973156	0.973156	0.902063	0.564757	0.798217	0.661665	0.357828	0.0925053	-0.613262	-1.08225	-1.25341	-1.25341	-1.25341	-1.25341	-1.25341	-1.25341
chr15:80404611_80405111	1.34318	1.34318	1.34318	1.34318	1.34318	1.34318	0.577056	0.239389	0.16048	-0.464962	-0.725966	-0.795475	-0.565526	-0.704987	-0.963182	-0.963182	-0.963182	-0.963182	-0.963182	-0.963182
chr7:73699969_73700469	1.18021	1.18021	1.18021	1.18021	1.18021	1.18021	1.00402	0.515217	0.257171	0.139714	-0.36549	-0.277601	-0.539289	-0.895108	-1.15331	-1.15331	-1.15331	-1.15331	-1.15331	-1.15331
chr3:49093313_49093813	1.10713	1.10713	1.10713	1.10713	1.10713	1.10713	0.818703	0.688611	0.645826	0.145573	-0.0507214	-0.120236	-0.493819	-1.06653	-1.2017	-1.2017	-1.2017	-1.2017	-1.2017	-1.2017
chr17:8888432_8888932	1.04877	1.04877	1.04877	1.04877	1.04877	1.04877	0.872534	0.872534	0.597043	-0.117479	-0.313822	-0.00370681	0.0526836	-0.416963	-1.30591	-1.30591	-1.30591	-1.30591	-1.30591	-1.30591
chr12:104064235_104064735	1.43247	1.43247	1.43247	1.43247	1.43247	1.43247	-0.581716	-0.4036	-0.617918	-0.897245	-0.958545	0.251169	-0.107891	-0.607218	-0.778645	-0.778645	-0.778645	-0.778645	-0.778645	-0.778645
chr16:88443021_88443521	1.02028	1.02028	1.02028	1.02028	1.02028	1.02028	0.843985	0.35488	0.35488	0.790261	0.529084	0.0691002	-0.416724	-1.08835	-1.2598	-1.2598	-1.2598	-1.2598	-1.2598	-1.2598
chr1:193059798_193060298	1.30955	1.30955	1.30955	1.30955	1.30955	1.30955	0.676265	0.546098	-0.190885	-0.72408	-1.10503	-1.33397	-1.2159	-0.735257	-0.629096	-0.629096	-0.629096	-0.629096	-0.629096	-0.629096
chr1:209784421_209784921	1.40839	1.40839	1.40839	1.40839	1.40839	1.40839	-0.45509	-0.418381	-0.424461	-0.425517	-0.222799	-0.00512552	-0.273868	-0.117724	-1.0179	-1.0179	-1.0179	-1.0179	-1.0179	-1.0179
chr5:151770460_151770960	1.22798	1.22798	1.22798	1.22798	1.22798	1.22798	1.18988	0.300723	-0.454192	-0.271974	0.0262829	-0.127904	-0.732128	-1.09378	-1.03413	-1.03413	-1.03413	-1.03413	-1.03413	-1.03413
chr3:122383871_122384371	1.30724	1.30724	1.30724	1.30724	1.30724	1.30724	0.805537	0.275436	-0.294584	-0.223959	-0.82169	-0.696737	-0.0758563	-0.69459	-1.0195	-1.0195	-1.0195	-1.0195	-1.0195	-1.0195
chr1:50426735_50427235	1.16136	1.16136	1.16136	1.16136	1.16136	1.16136	1.16136	0.823042	0.0675861	0.0675861	-0.313839	-0.774403	-0.679018	-0.824044	-1.08274	-1.08274	-1.08274	-1.08274	-1.08274	-1.08274
chr22:36481880_36482380	1.2936	1.2936	1.2936	1.2936	1.2936	1.2936	0.891713	0.242608	-0.0618051	-0.42711	-0.337647	-0.448428	-1.47696	-1.03863	-0.85089	-0.85089	-0.85089	-0.85089	-0.85089	-0.85089
chr3:9731100_9731600	1.05504	1.05504	1.05504	1.05504	1.05504	1.05504	0.36409	0.0224253	0.533622	0.134472	0.437088	0.134165	0.313326	0.0638983	-1.38889	-1.38889	-1.38889	-1.38889	-1.38889	-1.38889
chr14:43362440_43362940	1.25189	1.25189	1.25189	1.25189	1.25189	1.25189	1.0501	0.158963	0.158963	-0.0707438	-0.332645	-0.575363	-0.575363	-1.04647	-1.04647	-1.04647	-1.04647	-1.04647	-1.04647	-1.04647
chr22:23395822_23396322	1.1594	1.1594	1.1594	1.1594	1.1594	1.1594	1.03292	0.270081	0.601671	0.0402233	-0.042869	-0.529983	-0.434439	-0.905613	-1.16473	-1.16473	-1.16473	-1.16473	-1.16473	-1.16473
chr15:39933845_39934345	1.29255	1.29255	1.29255	1.29255	1.29255	1.29255	0.0573645	-0.433341	-1.14418	-1.5	-1.00101	-1.12903	-1.01057	-1.01057	-0.0519798	-0.0519798	-0.0519798	-0.0519798	-0.0519798	-0.0519798
chr11:134253189_134253689	1.23673	1.23673	1.23673	1.23673	1.23673	1.23673	0.719444	0.446888	0.47598	0.136314	-0.465332	-0.647195	-0.83449	-0.919668	-1.05538	-1.05538	-1.05538	-1.05538	-1.05538	-1.05538
chr3:127084084_127084584	1.1885	1.1885	1.1885	1.1885	1.1885	1.1885	1.1885	0.849367	-0.470085	-0.470085	-0.170896	-0.170896	-0.668425	-1.03121	-1.03121	-1.03121	-1.03121	-1.03121	-1.03121	-1.03121
chr10:34815115_34815615	1.07797	1.07797	1.07797	1.07797	1.07797	1.07797	0.97727	0.731461	0.454855	0.513167	-0.0401125	-0.345778	-0.720964	-0.737066	-1.21678	-1.21678	-1.21678	-1.21678	-1.21678	-1.21678
chr1:16613335_16613835	1.18359	1.18359	1.18359	1.18359	1.18359	1.18359	0.660035	0.722806	0.261436	0.107757	-0.270141	-0.0254868	-0.559291	-1.30398	-1.11578	-1.11578	-1.11578	-1.11578	-1.11578	-1.11578
chr20:46157689_46158189	1.23411	1.23411	1.23411	1.23411	1.23411	1.23411	0.867648	0.594984	-0.392827	-0.963833	-1.30236	-1.5	-1.29239	-0.772818	-0.41894	-0.41894	-0.41894	-0.41894	-0.41894	-0.41894
chr16:50152944_50153444	1.2076	1.2076	1.2076	1.2076	1.2076	1.2076	0.714356	0.30828	-0.117281	-1.00466	-1.5	-1.5	-1.0824	-0.836629	-0.28068	-0.28068	-0.28068	-0.28068	-0.28068	-0.28068
chr8:79612513_79613013	1.29105	1.29105	1.29105	1.29105	1.29105	1.29105	0.895792	0.262668	0.0236566	-0.717848	-1.31986	-1.42009	-0.962445	-0.785823	-0.620392	-0.620392	-0.620392	-0.620392	-0.620392	-0.620392
chr2:231371332_231371832	1.2267	1.2267	1.2267	1.2267	1.2267	1.2267	0.885654	0.709374	0.117777	-0.320713	-0.0212165	-0.776738	-0.776738	-1.02538	-1.02538	-1.02538	-1.02538	-1.02538	-1.02538	-1.02538
chr4:88823030_88823530	1.30808	1.30808	1.30808	1.30808	1.30808	1.30808	0.966975	0.333367	-0.258315	-0.488498	-0.750941	-0.577613	-0.577613	-0.603307	-0.982085	-0.982085	-0.982085	-0.982085	-0.982085	-0.982085
chr5:757925_758425	1.37841	1.37841	1.37841	1.37841	1.37841	1.37841	0.518559	0.272471	-0.588517	-0.616012	-1.07447	-1.20514	-0.704738	-0.870787	-0.666975	-0.666975	-0.666975	-0.666975	-0.666975	-0.666975
chr6:111663608_111664108	1.34694	1.34694	1.34694	1.34694	1.34694	1.34694	1.00578	-0.00644237	-0.418085	-1.04709	-0.882649	-0.673584	-0.809097	-0.822634	-0.73797	-0.73797	-0.73797	-0.73797	-0.73797	-0.73797
chr19:7197974_7198474	1.30949	1.30949	1.30949	1.30949	1.30949	1.30949	0.954471	0.191738	0.0812302	-0.584425	-0.584425	-0.804651	-0.977154	-0.587753	-0.924324	-0.924324	-0.924324	-0.924324	-0.924324	-0.924324
chr12:54579635_54580135	1.16931	1.16931	1.16931	1.16931	1.16931	1.16931	1.09768	0.463412	0.383985	0.0558574	-0.206858	-0.361869	-0.737866	-0.986797	-1.12057	-1.12057	-1.12057	-1.12057	-1.12057	-1.12057
chr11:118622529_118623029	1.21751	1.21751	1.21751	1.21751	1.21751	1.21751	0.993105	0.653169	-0.260858	-0.26192	-0.459515	-0.125118	-0.836388	-1.5	-0.88007	-0.88007	-0.88007	-0.88007	-0.88007	-0.88007
chrX:71103126_71103626	1.13163	1.13163	1.13163	1.13163	1.13163	1.13163	0.233706	0.270636	0.431237	0.368179	0.197848	0.219392	-0.0495033	-0.522252	-1.32317	-1.32317	-1.32317	-1.32317	-1.32317	-1.32317
chr12:64403758_64404258	1.34322	1.34322	1.34322	1.34322	1.34322	1.34322	0.445088	0.293029	0.18241	-0.705747	-0.525089	-0.396589	-0.662135	-1.2389	-0.908564	-0.908564	-0.908564	-0.908564	-0.908564	-0.908564
chr11:58578790_58579290	1.21074	1.21074	1.21074	1.21074	1.21074	1.21074	0.793341	0.451199	-0.239713	-0.241513	-0.905714	-0.305464	0.408571	-0.247713	-1.1629	-1.1629	-1.1629	-1.1629	-1.1629	-1.1629
chr8:37453692_37454192	1.09291	1.09291	1.09291	1.09291	1.09291	1.09291	0.831666	0.491443	0.664172	0.32665	0.0982543	-0.257913	-0.257913	-1.20769	-1.20769	-1.20769	-1.20769	-1.20769	-1.20769	-1.20769
chr10:68527315_68527815	1.42649	1.42649	1.42649	1.42649	1.42649	1.42649	0.28438	0.0376363	-0.689606	-0.618497	-0.701972	-0.460819	-0.72843	-0.86315	-0.80308	-0.80308	-0.80308	-0.80308	-0.80308	-0.80308
chr13:44260248_44260748	1.06647	1.06647	1.06647	1.06647	1.06647	1.06647	0.571348	-0.0641201	0.269081	0.836663	0.573449	0.216965	-0.282609	-0.756072	-1.29392	-1.29392	-1.29392	-1.29392	-1.29392	-1.29392
chr2:120252538_120253038	1.07126	1.07126	1.07126	1.07126	1.07126	1.07126	0.674506	0.140601	-0.0207585	0.834965	0.234749	0.0627379	-0.0257616	-0.276508	-1.34201	-1.34201	-1.34201	-1.34201	-1.34201	-1.34201
chr9:133119393_133119893	1.20302	1.20302	1.20302	1.20302	1.20302	1.20302	1.18715	0.291403	0.153629	-0.383806	-0.317348	0.0403005	-0.832559	-0.725317	-1.10527	-1.10527	-1.10527	-1.10527	-1.10527	-1.10527
chr11:113426543_113427043	1.28586	1.28586	1.28586	1.28586	1.28586	1.28586	0.943633	0.602985	-0.157677	-0.388618	-0.651927	-0.895948	-0.895948	-0.895948	-0.895948	-0.895948	-0.895948	-0.895948	-0.895948	-0.895948
chr1:19715505_19716005	1.17035	1.17035	1.17035	1.17035	1.17035	1.17035	1.17035	0.0415415	0.214503	-0.114398	0.186159	-0.188956	-0.452969	-0.702487	-1.19597	-1.19597	-1.19597	-1.19597	-1.19597	-1.19597
chr18:35467503_35468003	1.32154	1.32154	1.32154	1.32154	1.32154	1.32154	0.682894	0.0470072	0.0470072	-0.184003	-0.184003	-0.647881	-0.647881	-0.782724	-1.04328	-1.04328	-1.04328	-1.04328	-1.04328	-1.04328
chr7:149713966_149714466	1.3311	1.3311	1.3311	1.3311	1.3311	1.3311	0.697299	0.356508	-0.0565919	-0.394677	-0.502658	-0.685447	-1.07062	-0.955888	-0.895755	-0.895755	-0.895755	-0.895755	-0.895755	-0.895755
chr6:96837410_96837910	1.35832	1.35832	1.35832	1.35832	1.35832	1.35832	0.724423	0.0883648	-0.324797	-0.253604	-0.637875	-0.927879	-1.081	-1.09459	-0.773827	-0.773827	-0.773827	-0.773827	-0.773827	-0.773827
chr1:20365819_20366319	1.14749	1.14749	1.14749	1.14749	1.14749	1.14749	1.14749	0.51128	0.0980218	-0.000667315	-0.198835	0.0573394	-0.442816	-1.15096	-1.15096	-1.15096	-1.15096	-1.15096	-1.15096	-1.15096
chr1:155262116_155262616	1.1422	1.1422	1.1422	1.1422	1.1422	1.1422	0.753379	0.410224	0.164333	0.501647	0.507078	-0.617028	-1.2766	-0.547999	-1.12471	-1.12471	-1.12471	-1.12471	-1.12471	-1.12471
chr6:168035204_168035704	1.1804	1.1804	1.1804	1.1804	1.1804	1.1804	0.8377	0.8377	0.0759709	0.0759709	-0.0321165	-0.496506	-0.632633	-1.10693	-1.10693	-1.10693	-1.10693	-1.10693	-1.10693	-1.10693
chr11:66744451_66744951	1.13718	1.13718	1.13718	1.13718	1.13718	1.13718	1.06528	1.06528	0.626499	-0.568399	-0.630299	-0.88273	-1.04991	-1.09678	-0.892003	-0.892003	-0.892003	-0.892003	-0.892003	-0.892003
chr8:144792236_144792736	1.352	1.352	1.352	1.352	1.352	1.352	0.109001	0.163386	0.0524255	-0.755459	-0.331912	-0.238747	-0.0837381	-0.597879	-1.07151	-1.07151	-1.07151	-1.07151	-1.07151	-1.07151
chr11:126303740_126304240	1.39228	1.39228	1.39228	1.39228	1.39228	1.39228	0.419787	-0.477727	-0.477727	-0.929203	-1.07555	-1.27621	-0.4134	0.057334	-0.696834	-0.696834	-0.696834	-0.696834	-0.696834	-0.696834
chr6:33249114_33249614	1.30603	1.30603	1.30603	1.30603	1.30603	1.30603	0.900693	0.00316818	-1.1961	-0.779296	-1.17697	-0.92096	-1.46768	-0.696785	-0.417038	-0.417038	-0.417038	-0.417038	-0.417038	-0.417038
chr17:48054176_48054676	1.34942	1.34942	1.34942	1.34942	1.34942	1.34942	0.587718	0.435119	-0.309291	-0.238003	-0.84361	-0.752361	-0.897589	-0.719912	-0.893096	-0.893096	-0.893096	-0.893096	-0.893096	-0.893096
chr9:124453452_124453952	1.34535	1.34535	1.34535	1.34535	1.34535	1.34535	0.705561	0.364201	-0.398051	-0.398051	-0.66191	-1.12662	-1.12662	-0.82743	-0.767197	-0.767197	-0.767197	-0.767197	-0.767197	-0.767197
chr12:70242641_70243141	1.2073	1.2073	1.2073	1.2073	1.2073	1.2073	0.567463	0.752844	0.177327	0.333874	-0.16574	-0.750171	-0.616079	-0.751174	-1.13202	-1.13202	-1.13202	-1.13202	-1.13202	-1.13202
chr4:107931255_107931755	1.40058	1.40058	1.40058	1.40058	1.40058	1.40058	0.5517	-0.0853714	-0.346247	-0.787197	-0.720582	-0.849501	-0.375015	-0.900278	-0.815166	-0.815166	-0.815166	-0.815166	-0.815166	-0.815166
chr13:52195394_52195894	1.19713	1.19713	1.19713	1.19713	1.19713	1.19713	0.8283	0.67566	0.0962259	-0.0225202	-0.0225202	-0.430993	-0.430993	-1.00996	-1.14433	-1.14433	-1.14433	-1.14433	-1.14433	-1.14433
chr10:58268838_58269338	1.23444	1.23444	1.23444	1.23444	1.23444	1.23444	0.611114	0.957833	-0.197435	-0.536217	-0.682671	-0.0421512	-0.195568	-0.79157	-1.08833	-1.08833	-1.08833	-1.08833	-1.08833	-1.08833
chrX:110432863_110433363	1.21757	1.21757	1.21757	1.21757	1.21757	1.21757	1.14558	0.508186	0.0941548	-0.137404	-0.401417	-0.69203	-0.69203	-0.69203	-1.07307	-1.07307	-1.07307	-1.07307	-1.07307	-1.07307
chr19:29844211_29844711	1.08521	1.08521	1.08521	1.08521	1.08521	1.08521	1.01321	0.738617	0.316749	0.314941	0.141655	-0.204897	-0.567962	-1.31877	-1.15747	-1.15747	-1.15747	-1.15747	-1.15747	-1.15747
chr1:66533753_66534253	1.38072	1.38072	1.38072	1.38072	1.38072	1.38072	0.478009	0.136184	-0.627108	-1.06863	-0.903107	-0.891118	-1.27747	-0.882585	-0.541419	-0.541419	-0.541419	-0.541419	-0.541419	-0.541419
chr6:884488_884988	1.16084	1.16084	1.16084	1.16084	1.16084	1.16084	0.817252	0.322195	0.322195	0.0903357	0.392058	-0.0735245	-0.789116	-1.14949	-1.14949	-1.14949	-1.14949	-1.14949	-1.14949	-1.14949
chr1:182236199_182236699	1.32562	1.32562	1.32562	1.32562	1.32562	1.32562	0.301976	0.665337	0.250707	-0.559338	-0.559338	-0.850372	-0.995922	-0.771285	-0.905914	-0.905914	-0.905914	-0.905914	-0.905914	-0.905914
chr15:27327659_27328159	1.20944	1.20944	1.20944	1.20944	1.20944	1.20944	1.20944	0.867218	-0.335454	-0.335454	-0.59998	-0.59998	-0.736545	-0.736545	-0.998224	-0.998224	-0.998224	-0.998224	-0.998224	-0.998224
chr1:27571706_27572206	0.949092	0.949092	0.949092	0.949092	0.949092	0.949092	0.949092	0.771362	0.356466	0.565451	0.300887	0.469151	-0.533689	-0.533689	-1.33993	-1.33993	-1.33993	-1.33993	-1.33993	-1.33993
chr14:78491073_78491573	1.05004	1.05004	1.05004	1.05004	1.05004	1.05004	0.41771	0.592337	0.453844	0.478922	0.283221	0.128026	0.194565	-0.966687	-1.3137	-1.3137	-1.3137	-1.3137	-1.3137	-1.3137
chr13:43783693_43784193	1.36208	1.36208	1.36208	1.36208	1.36208	1.36208	0.720188	0.224435	-0.205208	-0.929678	-0.929678	-0.754842	-0.754842	-0.791838	-0.791838	-0.791838	-0.791838	-0.791838	-0.791838	-0.791838
chr14:73950036_73950536	1.24902	1.24902	1.24902	1.24902	1.24902	1.24902	1.04502	0.634984	-0.559359	-0.963306	-1.16241	-1.29423	-1.23705	-0.871699	-0.51434	-0.51434	-0.51434	-0.51434	-0.51434	-0.51434
chr11:33161323_33161823	1.15322	1.15322	1.15322	1.15322	1.15322	1.15322	1.02537	0.254279	-0.175441	0.146789	0.341662	-0.172872	-0.148001	-0.879297	-1.21864	-1.21864	-1.21864	-1.21864	-1.21864	-1.21864
chr5:124656668_124657168	1.29545	1.29545	1.29545	1.29545	1.29545	1.29545	1.11673	0.215808	-0.375186	-0.607415	-1.21818	-1.12902	-1.03244	-0.953891	-0.631523	-0.631523	-0.631523	-0.631523	-0.631523	-0.631523
chr5:129094371_129094871	1.42684	1.42684	1.42684	1.42684	1.42684	1.42684	0.346392	-0.190957	-0.432419	-0.940151	-1.02616	-0.930935	-0.697528	-0.762199	-0.654512	-0.654512	-0.654512	-0.654512	-0.654512	-0.654512
chr3:40584459_40584959	0.945372	0.945372	0.945372	0.945372	0.945372	0.945372	0.741196	0.741196	0.741196	0.741196	0.476197	0.117295	-0.699938	-0.699938	-1.30511	-1.30511	-1.30511	-1.30511	-1.30511	-1.30511
chr16:67395573_67396073	1.11051	1.11051	1.11051	1.11051	1.11051	1.11051	0.604556	0.65409	0.772123	0.61826	-0.0819371	-0.492356	-1.24366	-1.16296	-1.05519	-1.05519	-1.05519	-1.05519	-1.05519	-1.05519
chr6:144216235_144216735	1.26666	1.26666	1.26666	1.26666	1.26666	1.26666	0.922005	0.354226	0.0920691	-0.24827	-0.444374	-1.06507	-1.07911	-1.5	-0.771159	-0.771159	-0.771159	-0.771159	-0.771159	-0.771159
chr5:180353198_180353698	1.20173	1.20173	1.20173	1.20173	1.20173	1.20173	1.13119	-0.0279119	-0.0653206	-1.03305	-1.5	-1.5	-1.12991	-0.339955	-0.399823	-0.399823	-0.399823	-0.399823	-0.399823	-0.399823
chr7:73587845_73588345	1.43659	1.43659	1.43659	1.43659	1.43659	1.43659	0.0289035	-0.581408	-0.369963	-0.523865	-0.349199	-0.174047	-0.553607	-0.579571	-0.919463	-0.919463	-0.919463	-0.919463	-0.919463	-0.919463
chr14:24398709_24399209	1.14586	1.14586	1.14586	1.14586	1.14586	1.14586	1.14586	0.370622	0.544823	0.0666206	-0.279036	-0.349667	-0.511162	-0.867731	-1.16591	-1.16591	-1.16591	-1.16591	-1.16591	-1.16591
chr1:113929292_113929792	1.37689	1.37689	1.37689	1.37689	1.37689	1.37689	0.0228151	-0.0748394	-0.258385	0.132513	-0.68357	-0.179321	-0.285095	-0.724846	-1.0351	-1.0351	-1.0351	-1.0351	-1.0351	-1.0351
chr2:175168471_175168971	1.35636	1.35636	1.35636	1.35636	1.35636	1.35636	0.997802	-0.24772	-0.683995	-1.19231	-0.772142	-0.457107	-0.726842	-0.883293	-0.695423	-0.695423	-0.695423	-0.695423	-0.695423	-0.695423
chr8:6406368_6406868	1.26647	1.26647	1.26647	1.26647	1.26647	1.26647	0.623342	0.347508	0.267319	0.231207	-0.27098	-0.75172	-0.905878	-1.0476	-1.01534	-1.01534	-1.01534	-1.01534	-1.01534	-1.01534
chr20:64062767_64063267	1.12472	1.12472	1.12472	1.12472	1.12472	1.12472	0.845656	0.574113	0.371939	0.253895	0.106731	-0.205481	-0.390343	-0.888276	-1.23609	-1.23609	-1.23609	-1.23609	-1.23609	-1.23609
chr4:13627426_13627926	1.29922	1.29922	1.29922	1.29922	1.29922	1.29922	1.22689	0.170985	-0.950471	-0.900584	-0.596651	-0.437578	-0.825445	-1.07679	-0.734277	-0.734277	-0.734277	-0.734277	-0.734277	-0.734277
chr16:53503293_53503793	1.41553	1.41553	1.41553	1.41553	1.41553	1.41553	0.119398	0.048612	-0.5181	-0.127111	-0.421276	-1.00589	-0.617461	-0.954906	-0.836072	-0.836072	-0.836072	-0.836072	-0.836072	-0.836072
chr3:106341042_106341542	1.26144	1.26144	1.26144	1.26144	1.26144	1.26144	0.87973	0.288778	0.288778	-0.0426783	-0.514622	-1.04023	-1.30831	-1.16801	-0.825349	-0.825349	-0.825349	-0.825349	-0.825349	-0.825349
chr1:25997988_25998488	1.22074	1.22074	1.22074	1.22074	1.22074	1.22074	0.351227	0.00583358	0.706534	-0.261959	0.268562	-0.0957599	-0.456236	-1.5	-1.03706	-1.03706	-1.03706	-1.03706	-1.03706	-1.03706
chr5:140926434_140926934	1.14077	1.14077	1.14077	1.14077	1.14077	1.14077	0.781982	0.803372	0.561479	0.117979	-0.147425	-0.506876	-0.661131	-0.687114	-1.18448	-1.18448	-1.18448	-1.18448	-1.18448	-1.18448
chr6:42452100_42452600	1.1392	1.1392	1.1392	1.1392	1.1392	1.1392	0.987688	0.401743	0.519897	0.27906	-0.223456	-0.17455	-0.547639	-1.00465	-1.17888	-1.17888	-1.17888	-1.17888	-1.17888	-1.17888
chr19:4584780_4585280	1.30212	1.30212	1.30212	1.30212	1.30212	1.30212	0.414988	-0.195808	-0.307495	-0.544829	-1.5	-1.5	-1.1757	-0.779032	-0.310356	-0.310356	-0.310356	-0.310356	-0.310356	-0.310356
chr19:43668365_43668865	1.01722	1.01722	1.01722	1.01722	1.01722	1.01722	0.844716	0.550987	0.961052	0.234604	0.296709	-0.238246	-0.336134	-1.5	-1.10276	-1.10276	-1.10276	-1.10276	-1.10276	-1.10276
chr20:64120345_64120845	1.29375	1.29375	1.29375	1.29375	1.29375	1.29375	0.794387	0.153481	0.153481	-0.0793532	-0.34482	-0.590841	-1.09469	-1.24191	-0.918705	-0.918705	-0.918705	-0.918705	-0.918705	-0.918705
chr15:70853967_70854467	1.35023	1.35023	1.35023	1.35023	1.35023	1.35023	0.979183	-0.470043	-1.05744	-0.955619	-0.652002	-0.0698304	-0.442999	-0.694537	-0.78968	-0.78968	-0.78968	-0.78968	-0.78968	-0.78968
chr15:64162843_64163343	1.31404	1.31404	1.31404	1.31404	1.31404	1.31404	0.458529	0.344615	-0.0972756	0.011493	-0.439269	-0.477171	-0.452226	-0.616751	-1.1027	-1.1027	-1.1027	-1.1027	-1.1027	-1.1027
chr5:141879013_141879513	1.08043	1.08043	1.08043	1.08043	1.08043	1.08043	1.08043	0.73674	0.656422	0.271681	0.00602054	-0.672873	-0.718871	-0.970819	-1.14522	-1.14522	-1.14522	-1.14522	-1.14522	-1.14522
chr1:87200750_87201250	1.17075	1.17075	1.17075	1.17075	1.17075	1.17075	1.17075	0.39399	-0.0227561	-0.0227561	-0.0227561	-0.269035	-0.269035	-1.14042	-1.14042	-1.14042	-1.14042	-1.14042	-1.14042	-1.14042
chr4:6360235_6360735	1.22159	1.22159	1.22159	1.22159	1.22159	1.22159	0.87615	0.532304	0.532304	-0.19505	-0.912826	-0.669259	-0.549107	-0.575128	-1.06149	-1.06149	-1.06149	-1.06149	-1.06149	-1.06149
chr7:135977220_135977720	1.34057	1.34057	1.34057	1.34057	1.34057	1.34057	0.995028	0.090412	-0.98089	-0.710927	-0.976789	-1.04759	-0.502556	-0.649998	-0.71002	-0.71002	-0.71002	-0.71002	-0.71002	-0.71002
chr10:110460063_110460563	1.15191	1.15191	1.15191	1.15191	1.15191	1.15191	0.243248	-0.843153	-1.5	-1.5	-1.05184	-1.03978	-0.963578	-0.566097	0.155849	0.155849	0.155849	0.155849	0.155849	0.155849
chr6:153002491_153002991	1.31907	1.31907	1.31907	1.31907	1.31907	1.31907	0.683513	0.271602	-0.037984	-0.608087	-0.303328	-0.209354	-0.704112	-1.053	-0.99228	-0.99228	-0.99228	-0.99228	-0.99228	-0.99228
chr2:135741455_135741955	1.25708	1.25708	1.25708	1.25708	1.25708	1.25708	0.93887	-0.414056	-0.494475	-0.627871	0.386102	0.0759487	-0.118489	-0.798141	-1.08173	-1.08173	-1.08173	-1.08173	-1.08173	-1.08173
chr4:110196524_110197024	1.3647	1.3647	1.3647	1.3647	1.3647	1.3647	0.73653	-0.213474	-0.964093	-1.40861	-0.981331	-0.959525	-0.680881	-0.479496	-0.539551	-0.539551	-0.539551	-0.539551	-0.539551	-0.539551
chr2:65130095_65130595	1.37582	1.37582	1.37582	1.37582	1.37582	1.37582	0.507491	-0.287373	-0.352616	-0.238965	-0.0858197	-0.42301	-0.705009	-0.686076	-0.997256	-0.997256	-0.997256	-0.997256	-0.997256	-0.997256
chr17:38414617_38415117	1.27552	1.27552	1.27552	1.27552	1.27552	1.27552	0.77124	0.427058	0.346626	-0.290882	-1.00936	-0.593602	-0.860327	-0.493221	-0.991777	-0.991777	-0.991777	-0.991777	-0.991777	-0.991777
chr3:65816185_65816685	1.18359	1.18359	1.18359	1.18359	1.18359	1.18359	1.05511	0.39474	-0.530821	-0.606338	0.281812	0.155115	-0.111645	-1.1577	-1.09697	-1.09697	-1.09697	-1.09697	-1.09697	-1.09697
chr22:23566190_23566690	1.35359	1.35359	1.35359	1.35359	1.35359	1.35359	-0.00510501	-0.597739	-0.760878	-1.4892	-1.18332	-1.5	-0.869311	-0.283964	-0.237054	-0.237054	-0.237054	-0.237054	-0.237054	-0.237054
chr12:124727126_124727626	0.939816	0.939816	0.939816	0.939816	0.939816	0.939816	0.939816	0.939816	0.939816	0.301786	0.0355277	-0.211227	-0.211227	-0.340933	-1.33871	-1.33871	-1.33871	-1.33871	-1.33871	-1.33871
chr6:18536524_18537024	1.13646	1.13646	1.13646	1.13646	1.13646	1.13646	1.13646	0.791975	0.549293	-0.266499	-0.266499	-0.423607	-0.928984	-1.05869	-1.05869	-1.05869	-1.05869	-1.05869	-1.05869	-1.05869
chr22:28348820_28349320	1.40975	1.40975	1.40975	1.40975	1.40975	1.40975	0.15407	-0.489042	-0.151833	-0.07985	-0.390276	-0.298139	-0.67938	-0.93201	-0.93201	-0.93201	-0.93201	-0.93201	-0.93201	-0.93201
chr2:216606699_216607199	1.21411	1.21411	1.21411	1.21411	1.21411	1.21411	1.21411	0.570753	-0.0188874	-0.360903	-0.360903	-0.382678	-0.772333	-1.02483	-1.02483	-1.02483	-1.02483	-1.02483	-1.02483	-1.02483
chr5:81301312_81301812	1.30265	1.30265	1.30265	1.30265	1.30265	1.30265	0.801295	0.302173	-0.115799	-0.115799	-0.375731	-0.987592	-1.36904	-0.878561	-0.846142	-0.846142	-0.846142	-0.846142	-0.846142	-0.846142
chr2:237085565_237086065	1.1246	1.1246	1.1246	1.1246	1.1246	1.1246	0.615653	0.338291	0.690234	0.626243	-0.0285809	-0.436627	-0.396064	-0.754629	-1.23368	-1.23368	-1.23368	-1.23368	-1.23368	-1.23368
chr2:136356898_136357398	1.25435	1.25435	1.25435	1.25435	1.25435	1.25435	0.893605	0.548375	0.129895	-0.212594	-0.479444	-0.876725	-1.3832	-1.15648	-0.831584	-0.831584	-0.831584	-0.831584	-0.831584	-0.831584
chr20:39111973_39112473	1.19603	1.19603	1.19603	1.19603	1.19603	1.19603	0.849199	0.204948	0.12427	0.196381	0.196381	-0.16503	-0.550873	-1.03088	-1.16676	-1.16676	-1.16676	-1.16676	-1.16676	-1.16676
chr7:138002050_138002550	1.30279	1.30279	1.30279	1.30279	1.30279	1.30279	0.849595	-0.599673	0.0720605	-0.170129	0.139263	-0.939067	-1.29436	-1.2474	-0.771171	-0.771171	-0.771171	-0.771171	-0.771171	-0.771171
chr19:38063332_38063832	1.05347	1.05347	1.05347	1.05347	1.05347	1.05347	0.544079	0.910938	0.830234	0.285275	0.323007	-0.268206	-0.646689	-1.27864	-1.17014	-1.17014	-1.17014	-1.17014	-1.17014	-1.17014
chr8:26625195_26625695	1.25216	1.25216	1.25216	1.25216	1.25216	1.25216	0.905211	0.7508	-0.177782	-0.362025	-0.562767	-0.562767	-0.562767	-0.562767	-1.06301	-1.06301	-1.06301	-1.06301	-1.06301	-1.06301
chr2:239498941_239499441	1.00386	1.00386	1.00386	1.00386	1.00386	1.00386	0.756115	-0.0243842	0.607262	0.783668	0.472492	0.472492	-0.539668	-0.79268	-1.29308	-1.29308	-1.29308	-1.29308	-1.29308	-1.29308
chr12:64610214_64610714	1.24206	1.24206	1.24206	1.24206	1.24206	1.24206	1.06173	0.716103	-0.21322	-0.174948	-0.564613	-0.745452	-0.900725	-0.720794	-0.985074	-0.985074	-0.985074	-0.985074	-0.985074	-0.985074
chr8:37695382_37695882	1.25416	1.25416	1.25416	1.25416	1.25416	1.25416	1.0284	-0.00230089	-0.166142	0.175786	-0.240981	-0.144907	-0.96918	-0.933533	-1.04535	-1.04535	-1.04535	-1.04535	-1.04535	-1.04535
chr3:160449610_160450110	1.31583	1.31583	1.31583	1.31583	1.31583	1.31583	-0.0488751	0.536481	-0.0504923	-0.458324	-1.18024	-1.373	-1.5	-0.933932	-0.45696	-0.45696	-0.45696	-0.45696	-0.45696	-0.45696
chr1:209595688_209596188	1.27907	1.27907	1.27907	1.27907	1.27907	1.27907	1.07301	0.163047	-0.256351	-0.256351	-1.26785	-1.26785	-1.26785	-0.834331	-0.626645	-0.626645	-0.626645	-0.626645	-0.626645	-0.626645
chr1:67760014_67760514	1.14282	1.14282	1.14282	1.14282	1.14282	1.14282	0.795199	0.795199	0.0225318	0.0225318	0.180357	0.0225444	-0.485097	-1.17289	-1.17289	-1.17289	-1.17289	-1.17289	-1.17289	-1.17289
chr10:28663577_28664077	1.2553	1.2553	1.2553	1.2553	1.2553	1.2553	0.907578	0.561458	0.141899	-0.201473	-0.469011	-0.596405	-0.864632	-1.0016	-1.0016	-1.0016	-1.0016	-1.0016	-1.0016	-1.0016
chr11:6683245_6683745	1.31936	1.31936	1.31936	1.31936	1.31936	1.31936	0.808556	0.144196	-0.275588	-0.396044	-0.505772	-0.662756	-0.146262	-0.607181	-1.04589	-1.04589	-1.04589	-1.04589	-1.04589	-1.04589
chr18:55423442_55423942	1.30916	1.30916	1.30916	1.30916	1.30916	1.30916	0.790021	-0.467304	-0.548252	-0.882665	0.189718	-0.105185	-0.380625	-0.170485	-1.0467	-1.0467	-1.0467	-1.0467	-1.0467	-1.0467
chr11:125234997_125235497	1.35578	1.35578	1.35578	1.35578	1.35578	1.35578	0.582375	0.402429	-0.529354	-0.976964	-1.11489	-0.696281	-1.20468	-0.835058	-0.627041	-0.627041	-0.627041	-0.627041	-0.627041	-0.627041
chr7:31686985_31687485	1.21674	1.21674	1.21674	1.21674	1.21674	1.21674	1.03593	0.689381	0.269306	-0.178309	-1.09896	-0.968019	-1.00058	-1.14371	-0.817577	-0.817577	-0.817577	-0.817577	-0.817577	-0.817577
chr14:44896878_44897378	1.30109	1.30109	1.30109	1.30109	1.30109	1.30109	0.42336	-0.356847	0.0570088	-0.390667	-0.214225	0.441444	-0.283751	-0.841822	-1.10684	-1.10684	-1.10684	-1.10684	-1.10684	-1.10684
chr12:100573428_100573928	1.22451	1.22451	1.22451	1.22451	1.22451	1.22451	0.839064	0.889129	-0.283065	-1.18844	-0.980496	-1.32421	-1.31328	-1.08263	-0.483853	-0.483853	-0.483853	-0.483853	-0.483853	-0.483853
chr10:91798143_91798643	1.16039	1.16039	1.16039	1.16039	1.16039	1.16039	0.931468	0.847157	0.412121	-0.15117	-0.500512	-0.226299	-0.715735	-0.703363	-1.14267	-1.14267	-1.14267	-1.14267	-1.14267	-1.14267
chr19:34269023_34269523	1.15049	1.15049	1.15049	1.15049	1.15049	1.15049	1.15049	0.803561	0.383018	-0.0650968	-0.333262	-0.805555	-0.805555	-0.805555	-1.07083	-1.07083	-1.07083	-1.07083	-1.07083	-1.07083
chr20:63071739_63072239	1.17862	1.17862	1.17862	1.17862	1.17862	1.17862	0.528205	0.148032	0.487599	0.42324	0.200402	-0.198952	-0.591183	-0.721855	-1.22454	-1.22454	-1.22454	-1.22454	-1.22454	-1.22454
chr10:34780954_34781454	1.40117	1.40117	1.40117	1.40117	1.40117	1.40117	0.522266	-0.435773	-0.364552	-0.254676	-0.317649	-0.612939	-0.645549	-0.899733	-0.899733	-0.899733	-0.899733	-0.899733	-0.899733	-0.899733
chrX:48737027_48737527	1.18893	1.18893	1.18893	1.18893	1.18893	1.18893	0.538412	0.538412	0.538412	0.303107	-0.115222	-0.363855	-0.638344	-1.22697	-1.11792	-1.11792	-1.11792	-1.11792	-1.11792	-1.11792
chr19:49133712_49134212	1.22765	1.22765	1.22765	1.22765	1.22765	1.22765	0.590423	1.12315	0.0418801	-0.346737	-0.96571	-0.256337	-0.765635	-0.742033	-1.00748	-1.00748	-1.00748	-1.00748	-1.00748	-1.00748
chrX:135985162_135985662	1.19896	1.19896	1.19896	1.19896	1.19896	1.19896	0.547966	0.547966	0.547966	0.312487	-0.5136	-0.501418	-0.534055	-0.56034	-1.17346	-1.17346	-1.17346	-1.17346	-1.17346	-1.17346
chr5:170598600_170599100	1.204	1.204	1.204	1.204	1.204	1.204	1.02272	0.675273	0.254105	-0.230123	-0.498687	-0.498687	-0.498687	-0.981773	-1.07803	-1.07803	-1.07803	-1.07803	-1.07803	-1.07803
chr18:50287582_50288082	1.17294	1.17294	1.17294	1.17294	1.17294	1.17294	0.657348	0.572866	0.459717	0.255622	-0.253918	-0.833494	-0.911252	-0.0050991	-1.16324	-1.16324	-1.16324	-1.16324	-1.16324	-1.16324
chr11:130675215_130675715	1.35992	1.35992	1.35992	1.35992	1.35992	1.35992	0.264538	0.441781	-0.163766	-0.403942	-0.923811	-0.867834	-1.26058	-1.27443	-0.661913	-0.661913	-0.661913	-0.661913	-0.661913	-0.661913
chr4:1809807_1810307	1.25595	1.25595	1.25595	1.25595	1.25595	1.25595	0.750696	0.403207	0.182764	0.0420894	-0.418991	-0.667914	-0.486442	-0.617287	-1.12064	-1.12064	-1.12064	-1.12064	-1.12064	-1.12064
chr13:113209250_113209750	1.40723	1.40723	1.40723	1.40723	1.40723	1.40723	0.177871	0.0224717	0.0937967	-0.895387	-0.958453	-0.712254	-0.983634	-0.919941	-0.71131	-0.71131	-0.71131	-0.71131	-0.71131	-0.71131
chr6:89432881_89433381	1.23379	1.23379	1.23379	1.23379	1.23379	1.23379	0.353549	0.353549	-0.0757033	0.23254	0.0942033	-0.269667	-0.302327	-0.32863	-1.24337	-1.24337	-1.24337	-1.24337	-1.24337	-1.24337
chr3:97821728_97822228	1.30965	1.30965	1.30965	1.30965	1.30965	1.30965	0.803933	0.0814708	-0.348062	-0.349902	-0.84097	-1.29805	-1.45431	-1.27324	-0.529795	-0.529795	-0.529795	-0.529795	-0.529795	-0.529795
chr20:4686129_4686629	1.14032	1.14032	1.14032	1.14032	1.14032	1.14032	1.10113	0.452059	0.287257	-0.00250261	-0.140932	0.201215	-0.817866	-1.18436	-1.12299	-1.12299	-1.12299	-1.12299	-1.12299	-1.12299
chr3:155870188_155870688	1.39221	1.39221	1.39221	1.39221	1.39221	1.39221	0.527287	0.0247935	-0.300264	-0.725111	-0.765039	-1.13981	-0.864683	-1.04111	-0.67822	-0.67822	-0.67822	-0.67822	-0.67822	-0.67822
chr12:105084446_105084946	1.23861	1.23861	1.23861	1.23861	1.23861	1.23861	0.971498	0.623628	0.0286575	-0.0079516	-0.469536	-0.992069	-1.16869	-0.834141	-0.930512	-0.930512	-0.930512	-0.930512	-0.930512	-0.930512
chr12:54359013_54359513	1.22578	1.22578	1.22578	1.22578	1.22578	1.22578	1.21398	-0.254331	-1.5	-1.23663	-1.21763	-0.789414	-0.607695	-0.681191	-0.325607	-0.325607	-0.325607	-0.325607	-0.325607	-0.325607
chr14:103188928_103189428	1.23979	1.23979	1.23979	1.23979	1.23979	1.23979	1.23979	0.590397	-0.186647	-0.427168	-0.696147	-0.696147	-0.696147	-0.710019	-0.976103	-0.976103	-0.976103	-0.976103	-0.976103	-0.976103
chr1:90313463_90313963	1.12698	1.12698	1.12698	1.12698	1.12698	1.12698	0.919727	0.639987	0.669846	-0.475472	-0.0434063	-0.0434063	-0.436733	-0.809006	-1.19724	-1.19724	-1.19724	-1.19724	-1.19724	-1.19724
chr3:66997937_66998437	1.21723	1.21723	1.21723	1.21723	1.21723	1.21723	0.581845	1.14581	0.304125	-0.261304	-0.739802	-1.08491	-0.841164	-0.914688	-0.915548	-0.915548	-0.915548	-0.915548	-0.915548	-0.915548
chr13:107642747_107643247	1.38049	1.38049	1.38049	1.38049	1.38049	1.38049	0.222182	0.222182	-0.225715	-0.225715	-0.428128	-0.556297	-0.826156	-0.491261	-0.995674	-0.995674	-0.995674	-0.995674	-0.995674	-0.995674
chr9:131531013_131531513	1.26613	1.26613	1.26613	1.26613	1.26613	1.26613	0.622883	0.274616	-0.432862	-0.401943	-0.508079	-1.20417	-1.5	-1.44351	-0.431845	-0.431845	-0.431845	-0.431845	-0.431845	-0.431845
chr8:94216098_94216598	1.07095	1.07095	1.07095	1.07095	1.07095	1.07095	1.07095	0.420988	0.420988	0.493737	0.22452	-0.0718228	-0.694308	-1.06689	-1.20398	-1.20398	-1.20398	-1.20398	-1.20398	-1.20398
chr1:93180300_93180800	1.14201	1.14201	1.14201	1.14201	1.14201	1.14201	0.61979	0.238069	0.949178	0.704778	-0.651749	-0.404924	-0.953314	-1.36215	-0.998621	-0.998621	-0.998621	-0.998621	-0.998621	-0.998621
chr11:10792481_10792981	1.32679	1.32679	1.32679	1.32679	1.32679	1.32679	0.976652	0.326253	-0.452002	-0.688284	-0.957682	-0.536678	-0.80677	-0.80677	-0.835911	-0.835911	-0.835911	-0.835911	-0.835911	-0.835911
chr10:110919102_110919602	1.18448	1.18448	1.18448	1.18448	1.18448	1.18448	1.02923	0.595957	-0.102614	0.40254	-0.507702	-0.610037	-0.334294	-0.885848	-1.11569	-1.11569	-1.11569	-1.11569	-1.11569	-1.11569
chr14:97359278_97359778	1.25495	1.25495	1.25495	1.25495	1.25495	1.25495	0.904693	0.556046	0.133422	-0.212458	-0.48195	-0.48195	-0.993441	-0.993441	-0.993441	-0.993441	-0.993441	-0.993441	-0.993441	-0.993441
chr15:50765158_50765658	1.3855	1.3855	1.3855	1.3855	1.3855	1.3855	0.225463	0.225463	-0.553281	-1.00374	-0.570749	-0.867478	-0.415089	0.0218887	-0.895915	-0.895915	-0.895915	-0.895915	-0.895915	-0.895915
chr6:43143424_43143924	1.2488	1.2488	1.2488	1.2488	1.2488	1.2488	0.731258	0.731258	0.293688	-0.156843	-0.778757	-0.612636	-1.20656	-0.927748	-0.927748	-0.927748	-0.927748	-0.927748	-0.927748	-0.927748
chr17:62653902_62654402	1.22682	1.22682	1.22682	1.22682	1.22682	1.22682	1.22682	0.72184	-0.364738	-0.601245	-0.293476	-0.87302	-1.14337	-1.14337	-0.815061	-0.815061	-0.815061	-0.815061	-0.815061	-0.815061
chr12:45730517_45731017	1.15477	1.15477	1.15477	1.15477	1.15477	1.15477	1.08121	0.732202	0.123999	0.00260281	-0.267168	-0.254927	-0.527437	-0.783282	-1.17264	-1.17264	-1.17264	-1.17264	-1.17264	-1.17264
chr2:1538593_1539093	1.00875	1.00875	1.00875	1.00875	1.00875	1.00875	0.878474	0.529416	0.529416	0.288152	0.288152	0.0381055	0.0381055	-0.447222	-1.36585	-1.36585	-1.36585	-1.36585	-1.36585	-1.36585
chr6:41675278_41675778	1.22998	1.22998	1.22998	1.22998	1.22998	1.22998	0.979619	0.597183	0.174012	-0.116817	-0.627721	-0.710304	-0.984723	-0.44999	-1.04019	-1.04019	-1.04019	-1.04019	-1.04019	-1.04019
chr4:2934555_2935055	1.3074	1.3074	1.3074	1.3074	1.3074	1.3074	0.262608	0.746819	-0.55845	-0.447919	0.0278253	-0.506652	-0.223977	-0.955417	-1.03154	-1.03154	-1.03154	-1.03154	-1.03154	-1.03154
chr11:93197238_93197738	1.33066	1.33066	1.33066	1.33066	1.33066	1.33066	0.676188	0.0245377	-0.0197034	-0.0197034	-0.28962	-0.869729	-0.771276	-0.771276	-0.990567	-0.990567	-0.990567	-0.990567	-0.990567	-0.990567
chr13:78603305_78603805	1.34075	1.34075	1.34075	1.34075	1.34075	1.34075	0.418152	0.418152	-0.361952	-0.148642	-0.569708	-0.397962	-0.397962	-0.771681	-1.03881	-1.03881	-1.03881	-1.03881	-1.03881	-1.03881
chr4:83455604_83456104	1.2493	1.2493	1.2493	1.2493	1.2493	1.2493	1.06699	0.786132	-0.4735	-0.670461	-0.820305	-1.1572	-1.32843	-0.699858	-0.699858	-0.699858	-0.699858	-0.699858	-0.699858	-0.699858
chr19:40702495_40702995	0.983411	0.983411	0.983411	0.983411	0.983411	0.983411	0.983411	0.983411	0.983411	0.532015	-0.29914	-0.683934	-0.445946	-0.70234	-1.20856	-1.20856	-1.20856	-1.20856	-1.20856	-1.20856
chr14:88551173_88551673	1.22319	1.22319	1.22319	1.22319	1.22319	1.22319	0.871991	0.715686	0.291926	-0.159616	-0.429833	-0.561849	-1.06449	-1.00042	-1.00042	-1.00042	-1.00042	-1.00042	-1.00042	-1.00042
chr16:56877451_56877951	1.22909	1.22909	1.22909	1.22909	1.22909	1.22909	0.253885	-0.205291	0.136836	-0.104835	0.206203	0.299685	0.160158	-0.726047	-1.23252	-1.23252	-1.23252	-1.23252	-1.23252	-1.23252
chr19:19489321_19489821	1.06912	1.06912	1.06912	1.06912	1.06912	1.06912	0.717736	0.536114	0.314226	0.237494	0.430227	0.0640678	0.0467136	-1.09949	-1.27697	-1.27697	-1.27697	-1.27697	-1.27697	-1.27697
chr12:57772711_57773211	1.20051	1.20051	1.20051	1.20051	1.20051	1.20051	0.849055	0.849055	0.0678715	0.0678715	-0.444114	-0.444114	-0.592976	-1.07939	-1.07939	-1.07939	-1.07939	-1.07939	-1.07939	-1.07939
chr17:40111504_40112004	1.26918	1.26918	1.26918	1.26918	1.26918	1.26918	1.03818	0.38519	0.0998024	-0.352166	-0.458805	-0.892257	-1.06374	-1.09022	-0.880174	-0.880174	-0.880174	-0.880174	-0.880174	-0.880174
chr10:132223008_132223508	0.967041	0.967041	0.967041	0.967041	0.967041	0.967041	0.893287	-0.0270563	0.875689	0.323495	0.757957	0.324484	-0.607244	-0.402472	-1.3234	-1.3234	-1.3234	-1.3234	-1.3234	-1.3234
chr4:140109588_140110088	1.1504	1.1504	1.1504	1.1504	1.1504	1.1504	1.1504	0.800358	0.196437	0.0547302	-0.45755	-0.295293	-0.866824	-1.01688	-1.07796	-1.07796	-1.07796	-1.07796	-1.07796	-1.07796
chr13:36818920_36819420	1.34851	1.34851	1.34851	1.34851	1.34851	1.34851	0.692077	0.41054	-0.531184	-0.653008	-1.11773	-1.02208	-1.05499	-0.799578	-0.669177	-0.669177	-0.669177	-0.669177	-0.669177	-0.669177
chr19:11766755_11767255	1.31036	1.31036	1.31036	1.31036	1.31036	1.31036	0.958479	0.451467	-0.330661	-0.528108	-0.763242	-0.667586	-0.669753	-0.780288	-0.922078	-0.922078	-0.922078	-0.922078	-0.922078	-0.922078
chr19:34963950_34964450	1.26329	1.26329	1.26329	1.26329	1.26329	1.26329	0.911286	0.404101	0.404101	-0.337075	-0.607907	-0.767706	-0.925116	-0.95163	-0.95163	-0.95163	-0.95163	-0.95163	-0.95163	-0.95163
chr10:129971625_129972125	1.26244	1.26244	1.26244	1.26244	1.26244	1.26244	1.26244	0.295065	-0.129725	-0.367301	-0.638174	-0.691926	-0.724854	-0.856807	-0.953889	-0.953889	-0.953889	-0.953889	-0.953889	-0.953889
chr5:146620177_146620677	1.34859	1.34859	1.34859	1.34859	1.34859	1.34859	0.69153	0.377891	-0.233042	-0.987818	-1.0989	-0.777038	-0.654534	-0.654534	-0.792517	-0.792517	-0.792517	-0.792517	-0.792517	-0.792517
chr10:79399468_79399968	1.24201	1.24201	1.24201	1.24201	1.24201	1.24201	1.24201	0.73454	-0.629448	-0.497935	-0.768919	-0.768919	-1.16516	-0.828001	-0.795039	-0.795039	-0.795039	-0.795039	-0.795039	-0.795039
chr3:161069985_161070485	1.28798	1.28798	1.28798	1.28798	1.28798	1.28798	0.492546	0.677386	0.237577	-0.215258	-0.486248	-0.737388	-0.737388	-0.994159	-0.994159	-0.994159	-0.994159	-0.994159	-0.994159	-0.994159
chr17:77433704_77434204	1.26226	1.26226	1.26226	1.26226	1.26226	1.26226	0.910052	0.559463	0.134486	-0.318353	-1.24975	-1.24975	-0.794967	-0.794967	-0.794967	-0.794967	-0.794967	-0.794967	-0.794967	-0.794967
chr8:102789202_102789702	1.14756	1.14756	1.14756	1.14756	1.14756	1.14756	0.795247	0.795247	0.370144	0.132393	0.200825	-0.578569	-0.85034	-1.10719	-1.10719	-1.10719	-1.10719	-1.10719	-1.10719	-1.10719
chr8:10332667_10333167	1.25703	1.25703	1.25703	1.25703	1.25703	1.25703	1.04809	0.255459	-0.169804	-0.169804	-0.373728	-0.194634	-0.821645	-0.591248	-1.08748	-1.08748	-1.08748	-1.08748	-1.08748	-1.08748
chr4:674623_675123	1.13541	1.13541	1.13541	1.13541	1.13541	1.13541	0.621306	0.811846	0.564653	0.0756354	-0.0520124	-0.18116	-0.577744	-0.728157	-1.22447	-1.22447	-1.22447	-1.22447	-1.22447	-1.22447
chr16:58026022_58026522	1.1617	1.1617	1.1617	1.1617	1.1617	1.1617	0.809185	0.62698	0.40438	0.477672	-0.147965	-0.730888	-1.11906	-0.811523	-1.07983	-1.07983	-1.07983	-1.07983	-1.07983	-1.07983
chr10:68231325_68231825	1.25491	1.25491	1.25491	1.25491	1.25491	1.25491	0.366258	0.111926	-0.189979	0.406487	0.0562728	0.0341101	-0.344158	-1.07304	-1.14956	-1.14956	-1.14956	-1.14956	-1.14956	-1.14956
chr12:109477100_109477600	1.32954	1.32954	1.32954	1.32954	1.32954	1.32954	0.815302	0.464327	-0.301194	-0.543782	-0.654991	-0.953617	-0.854663	-0.902883	-0.840953	-0.840953	-0.840953	-0.840953	-0.840953	-0.840953
chr2:47002463_47002963	1.32988	1.32988	1.32988	1.32988	1.32988	1.32988	0.471644	0.386308	-0.706925	-0.632576	0.243842	-0.293501	-0.929404	-0.75288	-0.960964	-0.960964	-0.960964	-0.960964	-0.960964	-0.960964
chr4:185425984_185426484	1.2837	1.2837	1.2837	1.2837	1.2837	1.2837	1.05199	0.00577381	-0.744021	-0.639962	-0.328592	-0.00634467	-0.379393	-0.329775	-1.05531	-1.05531	-1.05531	-1.05531	-1.05531	-1.05531
chr7:102146084_102146584	1.38277	1.38277	1.38277	1.38277	1.38277	1.38277	0.872383	-0.290677	-0.716177	-0.642858	-0.472885	-0.724337	-0.757319	-0.889493	-0.779207	-0.779207	-0.779207	-0.779207	-0.779207	-0.779207
chr12:4269202_4269702	1.06127	1.06127	1.06127	1.06127	1.06127	1.06127	0.87805	0.695704	0.472932	0.28559	0.28559	0.125435	-0.711646	-1.1999	-1.1999	-1.1999	-1.1999	-1.1999	-1.1999	-1.1999
chr4:184537443_184537943	1.29925	1.29925	1.29925	1.29925	1.29925	1.29925	0.778177	-0.0123579	0.204066	0.202208	-0.730756	-0.944949	-0.660608	-1.12802	-0.917213	-0.917213	-0.917213	-0.917213	-0.917213	-0.917213
chr11:130655304_130655804	1.02392	1.02392	1.02392	1.02392	1.02392	1.02392	1.02392	0.841444	0.841444	0.286924	-0.339632	0.00604794	-0.622003	-0.879375	-1.21705	-1.21705	-1.21705	-1.21705	-1.21705	-1.21705
chr10:35642096_35642596	1.36425	1.36425	1.36425	1.36425	1.36425	1.36425	0.715127	-0.127259	0.0893301	-0.742964	-0.786674	-1.04673	-0.988063	-0.951832	-0.724406	-0.724406	-0.724406	-0.724406	-0.724406	-0.724406
chr12:120534096_120534596	1.01156	1.01156	1.01156	1.01156	1.01156	1.01156	0.759453	0.374347	0.374347	0.686096	0.724504	0.0301164	-0.362771	-0.851541	-1.30065	-1.30065	-1.30065	-1.30065	-1.30065	-1.30065
chr14:28766332_28766832	1.35874	1.35874	1.35874	1.35874	1.35874	1.35874	0.699849	-0.348026	-0.96066	-1.19899	-0.888206	-1.18732	-1.00373	-0.0299948	-0.539225	-0.539225	-0.539225	-0.539225	-0.539225	-0.539225
chr3:131114226_131114726	1.32577	1.32577	1.32577	1.32577	1.32577	1.32577	0.945856	0.0209875	-0.226747	-0.226747	-0.498562	-0.570949	-0.843463	-1.10146	-0.908925	-0.908925	-0.908925	-0.908925	-0.908925	-0.908925
chr9:120579944_120580444	1.4143	1.4143	1.4143	1.4143	1.4143	1.4143	0.244429	-0.443747	-0.168362	-1.08765	-1.04923	-0.700798	-0.675263	-0.0347401	-0.761735	-0.761735	-0.761735	-0.761735	-0.761735	-0.761735
chr8:20268021_20268521	1.41007	1.41007	1.41007	1.41007	1.41007	1.41007	0.102429	-1.06289	-1.28601	-0.577305	-0.973821	-0.47275	-0.988721	-0.988721	-0.368772	-0.368772	-0.368772	-0.368772	-0.368772	-0.368772
chr6:140678160_140678660	1.23581	1.23581	1.23581	1.23581	1.23581	1.23581	0.576619	0.598529	0.17219	-0.479266	0.104093	0.0316932	-0.936461	-1.06889	-1.06889	-1.06889	-1.06889	-1.06889	-1.06889	-1.06889
chr7:45136064_45136564	1.29747	1.29747	1.29747	1.29747	1.29747	1.29747	0.368447	0.0166581	0.0166581	-0.105706	0.0547485	0.0168287	-0.499271	-0.756923	-1.14938	-1.14938	-1.14938	-1.14938	-1.14938	-1.14938
chr15:78979567_78980067	1.19073	1.19073	1.19073	1.19073	1.19073	1.19073	0.531307	0.348611	0.348611	0.348611	0.0766547	-0.175381	-0.448038	-0.937227	-1.20626	-1.20626	-1.20626	-1.20626	-1.20626	-1.20626
chr19:41859196_41859696	0.997281	0.997281	0.997281	0.997281	0.997281	0.997281	0.764934	0.959529	0.845049	0.551834	-0.0757154	-0.235264	-0.400919	-0.762024	-1.27185	-1.27185	-1.27185	-1.27185	-1.27185	-1.27185
chr6:107308576_107309076	1.24051	1.24051	1.24051	1.24051	1.24051	1.24051	0.580772	-0.345024	-0.166314	0.297964	0.609721	-0.258241	-0.408026	-1.1077	-1.1077	-1.1077	-1.1077	-1.1077	-1.1077	-1.1077
chr1:18561883_18562383	1.1326	1.1326	1.1326	1.1326	1.1326	1.1326	0.731276	0.17928	0.300436	0.0570776	0.367699	0.208092	-0.308447	-0.566319	-1.29412	-1.29412	-1.29412	-1.29412	-1.29412	-1.29412
chr7:75993903_75994403	1.06452	1.06452	1.06452	1.06452	1.06452	1.06452	1.06452	0.881685	0.881685	0.112135	-0.242566	-0.599767	-1.31605	-0.940499	-1.03804	-1.03804	-1.03804	-1.03804	-1.03804	-1.03804
chr17:65137052_65137552	1.12283	1.12283	1.12283	1.12283	1.12283	1.12283	1.0486	0.865726	0.417953	0.0779483	-0.276835	-0.49164	-0.768484	-0.649911	-1.16006	-1.16006	-1.16006	-1.16006	-1.16006	-1.16006
chr14:72742202_72742702	1.27262	1.27262	1.27262	1.27262	1.27262	1.27262	0.918677	0.566362	-0.220355	-0.146765	-0.5714	-0.810116	-0.493688	-0.751726	-1.02112	-1.02112	-1.02112	-1.02112	-1.02112	-1.02112
chr1:77682406_77682906	1.19969	1.19969	1.19969	1.19969	1.19969	1.19969	0.413279	0.443949	0.399306	0.0591242	0.0591242	-0.0739427	-0.232245	-1.09729	-1.1949	-1.1949	-1.1949	-1.1949	-1.1949	-1.1949
chr10:45672597_45673097	1.26365	1.26365	1.26365	1.26365	1.26365	1.26365	0.626604	0.928349	0.0567125	-0.463622	-0.999731	-0.575531	-0.534101	-0.702871	-0.986284	-0.986284	-0.986284	-0.986284	-0.986284	-0.986284
chr16:86377282_86377782	1.22095	1.22095	1.22095	1.22095	1.22095	1.22095	1.22095	0.0530774	0.552669	-0.282048	-0.679432	-0.585195	-0.858344	-0.626865	-1.02008	-1.02008	-1.02008	-1.02008	-1.02008	-1.02008
chr6:160959950_160960450	1.08071	1.08071	1.08071	1.08071	1.08071	1.08071	1.08071	1.08071	0.65335	-0.350057	-0.350057	-0.627377	-0.387287	-0.645736	-1.15643	-1.15643	-1.15643	-1.15643	-1.15643	-1.15643
chr3:197466450_197466950	1.18301	1.18301	1.18301	1.18301	1.18301	1.18301	0.666191	0.666191	0.238611	0.238611	0.238611	-0.545324	-1.06281	-1.07687	-1.07687	-1.07687	-1.07687	-1.07687	-1.07687	-1.07687
chr4:58368177_58368677	1.14491	1.14491	1.14491	1.14491	1.14491	1.14491	1.14491	1.14491	0.0459781	-0.409747	-0.371198	-0.623941	-0.545806	-1.03637	-1.03637	-1.03637	-1.03637	-1.03637	-1.03637	-1.03637
chr1:31644703_31645203	1.32682	1.32682	1.32682	1.32682	1.32682	1.32682	0.361892	0.540307	-0.558901	-0.52757	-0.938825	-1.5	-0.934705	-0.0618721	-0.697272	-0.697272	-0.697272	-0.697272	-0.697272	-0.697272
chr2:55951973_55952473	1.02807	1.02807	1.02807	1.02807	1.02807	1.02807	1.02807	0.844813	0.844813	0.494689	-0.0218158	-0.709289	-0.98279	-0.863967	-1.13383	-1.13383	-1.13383	-1.13383	-1.13383	-1.13383
chrX:135973845_135974345	1.18812	1.18812	1.18812	1.18812	1.18812	1.18812	1.01083	0.827552	0.212475	-0.709273	-0.0716853	-0.371994	-0.752469	-1.11459	-1.02659	-1.02659	-1.02659	-1.02659	-1.02659	-1.02659
chr17:7704876_7705376	1.09497	1.09497	1.09497	1.09497	1.09497	1.09497	0.740336	0.456574	0.801986	0.724544	-0.0123504	-0.6081	-0.881662	-0.881662	-1.15159	-1.15159	-1.15159	-1.15159	-1.15159	-1.15159
chr7:129611504_129612004	1.32447	1.32447	1.32447	1.32447	1.32447	1.32447	0.800543	-0.106044	-0.554985	-1.22927	-1.0347	-1.37517	-1.02432	-1.01172	-0.401857	-0.401857	-0.401857	-0.401857	-0.401857	-0.401857
chr12:47826272_47826772	1.29258	1.29258	1.29258	1.29258	1.29258	1.29258	0.516171	0.516171	0.0881411	-0.151247	-0.151247	-0.658813	-0.658813	-1.03655	-1.03655	-1.03655	-1.03655	-1.03655	-1.03655	-1.03655
chr1:75724099_75724599	1.31044	1.31044	1.31044	1.31044	1.31044	1.31044	0.653703	0.517669	-0.0977015	-0.0239432	-0.812978	-0.923676	-0.983664	-1.05029	-0.856958	-0.856958	-0.856958	-0.856958	-0.856958	-0.856958
chr2:189440849_189441349	1.2432	1.2432	1.2432	1.2432	1.2432	1.2432	1.03281	0.679546	-0.109286	-0.174801	-0.643542	-1.15133	-0.732512	-1.20269	-0.85956	-0.85956	-0.85956	-0.85956	-0.85956	-0.85956
chr10:72286036_72286536	1.28735	1.28735	1.28735	1.28735	1.28735	1.28735	0.485658	0.861014	-0.239545	-0.479094	-1.2167	-1.2043	-1.08083	-1.22677	-0.603924	-0.603924	-0.603924	-0.603924	-0.603924	-0.603924
chr5:59587373_59587873	1.10092	1.10092	1.10092	1.10092	1.10092	1.10092	1.10092	0.747541	0.304233	0.0646634	-0.140743	-0.213485	-0.487335	-0.514076	-1.24453	-1.24453	-1.24453	-1.24453	-1.24453	-1.24453
chr2:218886406_218886906	1.13754	1.13754	1.13754	1.13754	1.13754	1.13754	0.866163	-0.147875	-1.17712	-1.5	-0.916889	-1.37991	-1.5	-1.2902	0.0453328	0.0453328	0.0453328	0.0453328	0.0453328	0.0453328
chr2:229714343_229714843	1.17118	1.17118	1.17118	1.17118	1.17118	1.17118	0.657116	-0.00265476	0.923147	-0.000155791	0.00547333	-0.482276	-0.423253	-0.386806	-1.21961	-1.21961	-1.21961	-1.21961	-1.21961	-1.21961
chr9:34620239_34620739	1.37351	1.37351	1.37351	1.37351	1.37351	1.37351	0.439418	0.338754	-0.116197	-0.771351	-0.732705	-0.600658	-0.574977	-0.942547	-0.880135	-0.880135	-0.880135	-0.880135	-0.880135	-0.880135
chr15:90200389_90200889	1.25623	1.25623	1.25623	1.25623	1.25623	1.25623	0.593236	0.593236	0.164436	0.0868313	-0.311985	-0.612966	-0.612966	-0.872049	-1.0942	-1.0942	-1.0942	-1.0942	-1.0942	-1.0942
chr7:135281443_135281943	1.29915	1.29915	1.29915	1.29915	1.29915	1.29915	0.943671	0.14423	0.14423	-0.414127	-0.414127	-0.667596	-0.941803	-0.709428	-0.979987	-0.979987	-0.979987	-0.979987	-0.979987	-0.979987
chr4:17636528_17637028	1.14014	1.14014	1.14014	1.14014	1.14014	1.14014	1.14014	0.786206	0.357171	0.279523	-0.660764	-0.791036	-0.791036	-0.791036	-1.06167	-1.06167	-1.06167	-1.06167	-1.06167	-1.06167
chr12:93441857_93442357	1.37889	1.37889	1.37889	1.37889	1.37889	1.37889	0.289092	-0.507895	-0.477519	-0.89504	-0.580504	-0.282425	0.092269	-0.0143388	-0.982834	-0.982834	-0.982834	-0.982834	-0.982834	-0.982834
chr18:74291842_74292342	1.26385	1.26385	1.26385	1.26385	1.26385	1.26385	0.96145	0.487502	-0.464494	-0.793142	-0.773809	-0.467754	0.144583	-0.538825	-1.0231	-1.0231	-1.0231	-1.0231	-1.0231	-1.0231
chr4:47485022_47485522	1.18049	1.18049	1.18049	1.18049	1.18049	1.18049	0.810461	0.810461	0.3812	-0.0762045	-0.0762045	-0.483719	-0.975009	-1.12127	-1.05878	-1.05878	-1.05878	-1.05878	-1.05878	-1.05878
chr19:46850709_46851209	1.04335	1.04335	1.04335	1.04335	1.04335	1.04335	0.771424	0.822563	0.816193	0.291599	-0.186567	0.0415155	-0.354271	-0.995795	-1.24446	-1.24446	-1.24446	-1.24446	-1.24446	-1.24446
chr12:6613865_6614365	1.25599	1.25599	1.25599	1.25599	1.25599	1.25599	1.09965	0.625377	-1.32372	-0.830139	-0.919051	-0.280817	-0.352607	-0.613476	-0.82352	-0.82352	-0.82352	-0.82352	-0.82352	-0.82352
chr12:124543486_124543986	1.35178	1.35178	1.35178	1.35178	1.35178	1.35178	0.608721	-0.886754	-0.384428	-0.677452	-1.30396	-0.911864	-0.299917	0.347295	-0.767052	-0.767052	-0.767052	-0.767052	-0.767052	-0.767052
chr11:3037259_3037759	1.22473	1.22473	1.22473	1.22473	1.22473	1.22473	0.868676	0.51426	0.289422	0.0491462	-0.469541	-0.723426	-0.599581	-0.599581	-1.11296	-1.11296	-1.11296	-1.11296	-1.11296	-1.11296
chr19:1755242_1755742	1.14867	1.14867	1.14867	1.14867	1.14867	1.14867	0.93754	0.753457	0.50371	-0.055704	-0.329725	-0.279232	-0.553959	-0.933191	-1.15582	-1.15582	-1.15582	-1.15582	-1.15582	-1.15582
chr5:90474037_90474537	1.26686	1.26686	1.26686	1.26686	1.26686	1.26686	0.751404	0.0898379	0.436723	0.0398699	-0.592221	-1.19051	-1.23796	-1.37825	-0.753347	-0.753347	-0.753347	-0.753347	-0.753347	-0.753347
chr15:45187780_45188280	1.00876	1.00876	1.00876	1.00876	1.00876	1.00876	0.79761	0.512616	0.223458	0.700748	0.0192529	0.114042	0.0964511	-0.259086	-1.37627	-1.37627	-1.37627	-1.37627	-1.37627	-1.37627
chr9:34611906_34612406	1.34022	1.34022	1.34022	1.34022	1.34022	1.34022	0.160178	0.342923	0.336541	-0.0464781	-0.787036	-0.618078	-0.90286	-1.16366	-0.893813	-0.893813	-0.893813	-0.893813	-0.893813	-0.893813
chr20:10433968_10434468	1.29308	1.29308	1.29308	1.29308	1.29308	1.29308	0.633293	0.496628	0.207289	-0.487774	-0.280209	-0.496586	-0.775456	-1.03654	-1.00318	-1.00318	-1.00318	-1.00318	-1.00318	-1.00318
chr8:19817682_19818182	1.26938	1.26938	1.26938	1.26938	1.26938	1.26938	1.05801	0.703109	-0.251161	-0.603247	-0.877574	-0.91583	-0.949177	-0.741496	-0.839815	-0.839815	-0.839815	-0.839815	-0.839815	-0.839815
chr16:79770439_79770939	1.27989	1.27989	1.27989	1.27989	1.27989	1.27989	1.0455	0.488865	-0.269594	-0.301963	-0.821577	-1.21251	-1.02709	-0.945675	-0.772548	-0.772548	-0.772548	-0.772548	-0.772548	-0.772548
chrX:55451837_55452337	1.03697	1.03697	1.03697	1.03697	1.03697	1.03697	0.680245	0.495862	0.999155	0.809721	0.0684895	-0.4149	-0.694022	-1.16662	-1.16662	-1.16662	-1.16662	-1.16662	-1.16662	-1.16662
chr13:31162206_31162706	1.15169	1.15169	1.15169	1.15169	1.15169	1.15169	0.62791	0.82074	0.851207	0.274403	-0.952203	-1.2023	-1.1911	-1.00624	-0.855424	-0.855424	-0.855424	-0.855424	-0.855424	-0.855424
chr3:52019509_52020009	1.03119	1.03119	1.03119	1.03119	1.03119	1.03119	1.03119	0.675944	0.675944	0.552379	-0.189184	-0.262311	-0.262311	-0.968423	-1.24006	-1.24006	-1.24006	-1.24006	-1.24006	-1.24006
chr3:61564505_61565005	1.17166	1.17166	1.17166	1.17166	1.17166	1.17166	0.78778	0.432464	0.207056	0.281272	0.281272	-0.415919	-0.575546	-0.955644	-1.17878	-1.17878	-1.17878	-1.17878	-1.17878	-1.17878
chr1:151008138_151008638	1.31346	1.31346	1.31346	1.31346	1.31346	1.31346	0.375043	-0.091615	0.127375	-0.530808	-0.215119	0.136921	-0.147043	-1.13024	-1.06754	-1.06754	-1.06754	-1.06754	-1.06754	-1.06754
chr20:21125666_21126166	1.08574	1.08574	1.08574	1.08574	1.08574	1.08574	0.907225	0.54972	0.434127	0.0150279	0.108995	-0.00736268	0.0344156	-0.875068	-1.28025	-1.28025	-1.28025	-1.28025	-1.28025	-1.28025
chr17:5116049_5116549	1.03184	1.03184	1.03184	1.03184	1.03184	1.03184	1.03184	1.03184	0.60105	0.142016	-0.132685	-0.132685	-0.408092	-1.18919	-1.18919	-1.18919	-1.18919	-1.18919	-1.18919	-1.18919
chr1:56495394_56495894	1.24237	1.24237	1.24237	1.24237	1.24237	1.24237	0.885272	0.203369	-0.227499	0.0877209	-0.187029	-0.260197	-0.419884	-0.446783	-1.18153	-1.18153	-1.18153	-1.18153	-1.18153	-1.18153
chr8:43093155_43093655	1.31252	1.31252	1.31252	1.31252	1.31252	1.31252	0.506027	-0.157311	0.190503	0.229865	-0.0564396	-0.664967	-0.947618	-0.996455	-0.996455	-0.996455	-0.996455	-0.996455	-0.996455	-0.996455
chr16:20806224_20806724	1.30134	1.30134	1.30134	1.30134	1.30134	1.30134	0.6448	0.130258	-0.483021	-1.04394	-1.5	-1.09557	-1.49285	-0.468553	-0.405832	-0.405832	-0.405832	-0.405832	-0.405832	-0.405832
chr7:2112025_2112525	1.25894	1.25894	1.25894	1.25894	1.25894	1.25894	0.901751	0.583669	-0.21025	-0.21025	-0.21025	-0.46494	-0.740468	-0.874344	-1.05476	-1.05476	-1.05476	-1.05476	-1.05476	-1.05476
chr3:49877721_49878221	1.29921	1.29921	1.29921	1.29921	1.29921	1.29921	0.650226	-0.0883121	-0.360011	0.248739	0.177019	-0.453896	-0.96511	-0.749415	-1.04242	-1.04242	-1.04242	-1.04242	-1.04242	-1.04242
chr12:125014102_125014602	1.11359	1.11359	1.11359	1.11359	1.11359	1.11359	0.756194	0.756194	0.412699	-0.057952	0.255894	0.00105774	-0.520845	-0.890531	-1.23237	-1.23237	-1.23237	-1.23237	-1.23237	-1.23237
chr11:116731082_116731582	1.32574	1.32574	1.32574	1.32574	1.32574	1.32574	-0.0917569	-1.27083	-0.661276	-0.267427	0.294439	0.221187	0.299993	-0.632447	-0.97439	-0.97439	-0.97439	-0.97439	-0.97439	-0.97439
chr13:60163767_60164267	1.26234	1.26234	1.26234	1.26234	1.26234	1.26234	0.744872	0.388979	0.117017	0.028528	-0.646889	-0.146402	-0.640147	-1.11383	-1.05103	-1.05103	-1.05103	-1.05103	-1.05103	-1.05103
chr11:2721065_2721565	1.21015	1.21015	1.21015	1.21015	1.21015	1.21015	0.8525	0.4965	0.413306	0.223382	-0.519767	-0.519767	-0.797736	-1.05847	-1.05847	-1.05847	-1.05847	-1.05847	-1.05847	-1.05847
chr17:10616491_10616991	1.2529	1.2529	1.2529	1.2529	1.2529	1.2529	0.585528	0.229454	0.229454	0.229454	-0.045779	-0.325864	-0.84825	-0.84825	-1.12052	-1.12052	-1.12052	-1.12052	-1.12052	-1.12052
chr16:720280_720780	1.20585	1.20585	1.20585	1.20585	1.20585	1.20585	0.442848	0.864756	0.574321	0.0196746	-0.409526	-1.20569	-0.885861	-1.45925	-0.862731	-0.862731	-0.862731	-0.862731	-0.862731	-0.862731
chr15:94582287_94582787	1.22053	1.22053	1.22053	1.22053	1.22053	1.22053	0.862719	0.862719	0.242045	-0.217996	-0.493299	-0.866156	-0.866156	-1.12701	-0.953343	-0.953343	-0.953343	-0.953343	-0.953343	-0.953343
chr1:174159726_174160226	1.11715	1.11715	1.11715	1.11715	1.11715	1.11715	0.759159	0.574121	0.922801	0.262764	-0.138986	-0.624094	-0.641775	-0.775953	-1.17349	-1.17349	-1.17349	-1.17349	-1.17349	-1.17349
chr19:16197483_16197983	1.07632	1.07632	1.07632	1.07632	1.07632	1.07632	0.841059	0.86326	-0.246758	-0.488367	0.229575	0.124283	0.203206	-0.178031	-1.30103	-1.30103	-1.30103	-1.30103	-1.30103	-1.30103
chr6:97282969_97283469	1.32468	1.32468	1.32468	1.32468	1.32468	1.32468	0.966508	0.160991	-0.635127	-0.131201	-0.766886	-0.591614	-0.565728	-0.82749	-0.926258	-0.926258	-0.926258	-0.926258	-0.926258	-0.926258
chr11:102346983_102347483	1.3457	1.3457	1.3457	1.3457	1.3457	1.3457	0.581747	0.0661231	-0.0171987	-0.861572	-0.544014	-0.303969	-0.306176	-0.568439	-1.02012	-1.02012	-1.02012	-1.02012	-1.02012	-1.02012
chr22:23178374_23178874	1.28422	1.28422	1.28422	1.28422	1.28422	1.28422	1.20905	0.271063	-0.16125	-0.724031	-1.12611	-0.873485	-0.794504	-0.935636	-0.761734	-0.761734	-0.761734	-0.761734	-0.761734	-0.761734
chr19:56642739_56643239	0.937167	0.937167	0.937167	0.937167	0.937167	0.937167	0.751062	0.789804	0.789804	0.789804	0.267791	0.105115	-0.418173	-0.799738	-1.31641	-1.31641	-1.31641	-1.31641	-1.31641	-1.31641
chr21:32771800_32772300	1.27157	1.27157	1.27157	1.27157	1.27157	1.27157	0.60302	-0.0812922	0.340497	-0.187913	0.00157072	-0.0377818	-1.1745	-1.43656	-0.942743	-0.942743	-0.942743	-0.942743	-0.942743	-0.942743
chr1:206635199_206635699	1.38552	1.38552	1.38552	1.38552	1.38552	1.38552	0.730566	-0.293198	-0.752143	-0.912196	-0.596179	-0.618715	-0.17004	-0.599709	-0.850256	-0.850256	-0.850256	-0.850256	-0.850256	-0.850256
chr13:75537910_75538410	1.271	1.271	1.271	1.271	1.271	1.271	1.19577	0.0686982	-0.182773	-0.306934	-0.286191	-0.477651	-0.620094	-0.881979	-1.02247	-1.02247	-1.02247	-1.02247	-1.02247	-1.02247
chr12:121524426_121524926	1.40027	1.40027	1.40027	1.40027	1.40027	1.40027	0.404563	0.170618	-0.451511	-1.06723	-0.545416	-0.707248	-0.628188	-0.562766	-0.835743	-0.835743	-0.835743	-0.835743	-0.835743	-0.835743
chr16:13919752_13920252	1.26072	1.26072	1.26072	1.26072	1.26072	1.26072	0.829288	-0.087378	-0.0567455	0.0771872	-0.871311	-1.44474	-1.5	-0.807217	-0.561233	-0.561233	-0.561233	-0.561233	-0.561233	-0.561233
chr9:91423669_91424169	1.13108	1.13108	1.13108	1.13108	1.13108	1.13108	0.356581	0.990131	0.384139	-0.144759	0.642563	-0.472431	-0.632831	-1.38085	-1.08817	-1.08817	-1.08817	-1.08817	-1.08817	-1.08817
chr12:132423821_132424321	1.35406	1.35406	1.35406	1.35406	1.35406	1.35406	0.684878	0.125113	-0.166089	-0.565779	-0.510572	-0.415113	-0.697479	-1.17269	-0.901108	-0.901108	-0.901108	-0.901108	-0.901108	-0.901108
chr7:124765975_124766475	1.11396	1.11396	1.11396	1.11396	1.11396	1.11396	1.07372	1.07372	0.27627	-0.28727	-0.248252	-0.379695	-0.656448	-0.536213	-1.1666	-1.1666	-1.1666	-1.1666	-1.1666	-1.1666
chr1:201955166_201955666	1.38668	1.38668	1.38668	1.38668	1.38668	1.38668	0.198774	-0.0882988	-1.12831	-0.84801	-0.0503031	0.111411	-0.783438	-0.524703	-0.867867	-0.867867	-0.867867	-0.867867	-0.867867	-0.867867
chr1:214391870_214392370	1.29527	1.29527	1.29527	1.29527	1.29527	1.29527	0.936481	0.270014	-0.1629	-0.40502	-0.40502	-0.778893	-0.535687	-0.415446	-1.04586	-1.04586	-1.04586	-1.04586	-1.04586	-1.04586
chr1:38285689_38286189	1.27456	1.27456	1.27456	1.27456	1.27456	1.27456	0.755138	0.777392	0.0142715	-0.831723	-1.26228	-0.993853	-0.530453	-0.530453	-0.840896	-0.840896	-0.840896	-0.840896	-0.840896	-0.840896
chr15:22786411_22786911	1.31897	1.31897	1.31897	1.31897	1.31897	1.31897	0.654323	0.36705	-0.0661511	-0.313162	-1.16311	-1.38108	-1.02598	-0.879952	-0.684289	-0.684289	-0.684289	-0.684289	-0.684289	-0.684289
chrX:153471029_153471529	1.24469	1.24469	1.24469	1.24469	1.24469	1.24469	1.00874	0.823144	-0.290103	-0.414425	-0.527675	-0.476766	-0.880737	-1.14251	-0.927965	-0.927965	-0.927965	-0.927965	-0.927965	-0.927965
chr12:108129065_108129565	1.25874	1.25874	1.25874	1.25874	1.25874	1.25874	1.18338	0.516144	-0.10694	-0.461649	-0.821837	-0.728777	-0.762373	-0.789431	-0.930158	-0.930158	-0.930158	-0.930158	-0.930158	-0.930158
chr19:42283027_42283527	1.18892	1.18892	1.18892	1.18892	1.18892	1.18892	1.14863	1.01088	-0.245733	-0.436496	-0.712886	-0.786491	-0.465343	-0.465343	-1.03012	-1.03012	-1.03012	-1.03012	-1.03012	-1.03012
chr12:124790957_124791457	1.00534	1.00534	1.00534	1.00534	1.00534	1.00534	0.477883	0.857754	0.630901	0.630901	0.354493	-0.01986	-0.296979	-0.794175	-1.31216	-1.31216	-1.31216	-1.31216	-1.31216	-1.31216
chr3:133895590_133896090	1.27481	1.27481	1.27481	1.27481	1.27481	1.27481	0.49907	0.141464	0.172146	-0.267182	0.183627	-0.457376	-0.196461	-0.850847	-1.14555	-1.14555	-1.14555	-1.14555	-1.14555	-1.14555
chr7:90244909_90245409	1.36244	1.36244	1.36244	1.36244	1.36244	1.36244	0.55076	0.0329122	-0.0506896	-0.713324	-1.23688	-1.01664	-0.27181	-0.439196	-0.838298	-0.838298	-0.838298	-0.838298	-0.838298	-0.838298
chr4:139734912_139735412	1.35339	1.35339	1.35339	1.35339	1.35339	1.35339	0.983451	-0.527096	-0.992207	-1.35082	-0.827579	-0.534149	-0.726997	-0.641487	-0.583906	-0.583906	-0.583906	-0.583906	-0.583906	-0.583906
chr1:60916901_60917401	1.1222	1.1222	1.1222	1.1222	1.1222	1.1222	0.735411	1.11573	0.681749	-0.0755745	-1.02669	-0.674513	-0.317784	-0.579996	-1.09859	-1.09859	-1.09859	-1.09859	-1.09859	-1.09859
chrX:102720408_102720908	1.1428	1.1428	1.1428	1.1428	1.1428	1.1428	0.330501	1.0375	0.603517	0.0385616	-0.238174	-0.142454	-0.419902	-0.917687	-1.19144	-1.19144	-1.19144	-1.19144	-1.19144	-1.19144
chr1:2640140_2640640	1.16561	1.16561	1.16561	1.16561	1.16561	1.16561	0.978786	0.62072	0.62072	-0.227247	-0.227247	-0.602094	-0.602094	-0.736921	-1.13638	-1.13638	-1.13638	-1.13638	-1.13638	-1.13638
chr20:35277875_35278375	1.23029	1.23029	1.23029	1.23029	1.23029	1.23029	0.691362	1.04039	0.275488	-0.661173	-0.814735	-0.485995	-0.871983	-1.13505	-0.903342	-0.903342	-0.903342	-0.903342	-0.903342	-0.903342
chr10:117239627_117240127	1.26997	1.26997	1.26997	1.26997	1.26997	1.26997	0.73851	0.220038	-0.00718463	-0.362518	-0.755179	-1.5	-1.45133	-1.4007	-0.508188	-0.508188	-0.508188	-0.508188	-0.508188	-0.508188
chr3:184185841_184186341	1.13463	1.13463	1.13463	1.13463	1.13463	1.13463	0.976564	0.27563	0.191918	0.698238	0.110225	-0.762535	-0.855627	-0.419333	-1.17048	-1.17048	-1.17048	-1.17048	-1.17048	-1.17048
chr1:228406729_228407229	1.35164	1.35164	1.35164	1.35164	1.35164	1.35164	0.538524	-0.691949	-1.1476	-1.29268	-0.853856	-1.06458	-1.26255	-0.532377	-0.300464	-0.300464	-0.300464	-0.300464	-0.300464	-0.300464
chr19:14006662_14007162	1.15855	1.15855	1.15855	1.15855	1.15855	1.15855	0.112804	0.879978	0.43028	-0.233691	0.581674	-0.447643	-0.186099	-1.15475	-1.15564	-1.15564	-1.15564	-1.15564	-1.15564	-1.15564
chr19:49672251_49672751	1.19108	1.19108	1.19108	1.19108	1.19108	1.19108	1.19108	0.672085	-0.444656	-0.251407	-0.251407	0.0180069	-0.836664	-1.32401	-0.986587	-0.986587	-0.986587	-0.986587	-0.986587	-0.986587
chr1:176976124_176976624	1.38175	1.38175	1.38175	1.38175	1.38175	1.38175	0.40138	0.215192	-0.671628	-0.794974	-0.366448	-0.195681	-0.480797	-0.968165	-0.904897	-0.904897	-0.904897	-0.904897	-0.904897	-0.904897
chr11:66268204_66268704	1.37767	1.37767	1.37767	1.37767	1.37767	1.37767	0.577344	-0.110615	-0.433249	-0.319715	-0.122112	-0.751526	-1.04059	-1.08986	-0.829287	-0.829287	-0.829287	-0.829287	-0.829287	-0.829287
chr22:17266120_17266620	1.22583	1.22583	1.22583	1.22583	1.22583	1.22583	1.15024	0.481001	0.206954	-0.495676	-1.08072	-1.27308	-1.32107	-0.771754	-0.708475	-0.708475	-0.708475	-0.708475	-0.708475	-0.708475
chr18:78631010_78631510	0.994683	0.994683	0.994683	0.994683	0.994683	0.994683	0.994683	0.636005	0.636005	0.39284	0.39284	0.135903	-0.614581	-0.877278	-1.27742	-1.27742	-1.27742	-1.27742	-1.27742	-1.27742
chr4:185726800_185727300	1.39832	1.39832	1.39832	1.39832	1.39832	1.39832	0.450896	0.0921383	-0.708963	-0.390809	-0.668116	-0.398538	-0.676559	-1.05459	-0.839235	-0.839235	-0.839235	-0.839235	-0.839235	-0.839235
chr3:14395983_14396483	1.1669	1.1669	1.1669	1.1669	1.1669	1.1669	0.779209	0.420364	-0.20498	-0.173122	0.44745	0.181916	-0.344535	-0.712701	-1.2325	-1.2325	-1.2325	-1.2325	-1.2325	-1.2325
chr9:2621206_2621706	1.16381	1.16381	1.16381	1.16381	1.16381	1.16381	0.871915	0.678491	0.508426	0.441861	-0.797953	-1.19315	-0.624393	-0.887507	-0.996755	-0.996755	-0.996755	-0.996755	-0.996755	-0.996755
chrX:49163566_49164066	1.10532	1.10532	1.10532	1.10532	1.10532	1.10532	1.0296	0.670345	0.234861	0.197054	0.0832215	-0.00176493	-0.753459	-0.812438	-1.21322	-1.21322	-1.21322	-1.21322	-1.21322	-1.21322
chr9:131893033_131893533	1.29411	1.29411	1.29411	1.29411	1.29411	1.29411	0.932929	0.243229	-0.192566	-0.725136	-0.264225	-0.39999	-0.388659	-0.651969	-1.05304	-1.05304	-1.05304	-1.05304	-1.05304	-1.05304
chr12:113797168_113797668	1.28684	1.28684	1.28684	1.28684	1.28684	1.28684	0.925654	0.56613	-0.236683	-0.480422	-0.480422	-0.480422	-0.759036	-1.02235	-0.958916	-0.958916	-0.958916	-0.958916	-0.958916	-0.958916
chr10:129964087_129964587	1.26112	1.26112	1.26112	1.26112	1.26112	1.26112	1.18532	-0.133353	0.148234	-0.316271	-0.27698	-0.805989	-1.33358	-1.28274	-0.791891	-0.791891	-0.791891	-0.791891	-0.791891	-0.791891
chr22:49491035_49491535	1.23872	1.23872	1.23872	1.23872	1.23872	1.23872	1.02437	0.837484	-0.100805	-0.565686	-0.544771	-0.544771	-0.823686	-0.959208	-0.959208	-0.959208	-0.959208	-0.959208	-0.959208	-0.959208
chr5:78648458_78648958	1.18288	1.18288	1.18288	1.18288	1.18288	1.18288	1.10886	-0.306281	0.657492	-0.284102	-1.36787	-0.987529	-1.5	-1.24979	-0.494536	-0.494536	-0.494536	-0.494536	-0.494536	-0.494536
chr4:118909414_118909914	1.29432	1.29432	1.29432	1.29432	1.29432	1.29432	0.932618	0.572588	-0.231357	-0.588529	-0.518275	-0.65079	-0.80399	-0.80399	-0.945694	-0.945694	-0.945694	-0.945694	-0.945694	-0.945694
chr5:126595060_126595560	1.12793	1.12793	1.12793	1.12793	1.12793	1.12793	0.585987	0.103991	0.0198463	0.0817554	0.528804	0.732062	-0.464142	-1.19293	-1.19382	-1.19382	-1.19382	-1.19382	-1.19382	-1.19382
chr18:26548368_26548868	1.23823	1.23823	1.23823	1.23823	1.23823	1.23823	1.23823	0.290938	0.0156999	-0.23325	-0.321566	-0.811894	-0.710345	-0.749253	-1.02466	-1.02466	-1.02466	-1.02466	-1.02466	-1.02466
chr20:46689354_46689854	1.03042	1.03042	1.03042	1.03042	1.03042	1.03042	0.983457	0.895847	0.778639	0.0905091	0.185789	-0.43111	-0.619893	-0.607037	-1.24312	-1.24312	-1.24312	-1.24312	-1.24312	-1.24312
chr14:32273040_32273540	1.39314	1.39314	1.39314	1.39314	1.39314	1.39314	0.441386	0.30255	-0.502208	-1.07091	-0.752965	-0.752965	-0.752965	-0.752965	-0.752965	-0.752965	-0.752965	-0.752965	-0.752965	-0.752965
chr12:123972679_123973179	1.15982	1.15982	1.15982	1.15982	1.15982	1.15982	-0.325348	-0.273297	-0.749552	0.137959	0.460927	0.703595	0.504489	0.0140794	-1.23863	-1.23863	-1.23863	-1.23863	-1.23863	-1.23863
chr15:52261706_52262206	1.07288	1.07288	1.07288	1.07288	1.07288	1.07288	1.07288	0.750197	0.750197	0.284313	-0.0790386	-0.570059	-0.849576	-1.11375	-1.11375	-1.11375	-1.11375	-1.11375	-1.11375	-1.11375
chr7:6614856_6615356	1.32895	1.32895	1.32895	1.32895	1.32895	1.32895	0.376416	0.189121	0.313236	0.0687062	-0.574407	-0.738909	-1.01843	-1.01843	-0.928503	-0.928503	-0.928503	-0.928503	-0.928503	-0.928503
chr1:12229733_12230233	1.13293	1.13293	1.13293	1.13293	1.13293	1.13293	0.998309	1.03749	-0.230139	-0.140848	-0.41966	-0.0152162	-0.294747	-0.55893	-1.19564	-1.19564	-1.19564	-1.19564	-1.19564	-1.19564
chr9:134163935_134164435	1.23379	1.23379	1.23379	1.23379	1.23379	1.23379	1.15776	0.592173	-0.0365028	-0.704712	-1.1834	-0.520468	-0.664428	-0.317482	-0.954283	-0.954283	-0.954283	-0.954283	-0.954283	-0.954283
chr7:1321360_1321860	1.11825	1.11825	1.11825	1.11825	1.11825	1.11825	0.58587	0.58587	0.58587	0.0828492	0.103824	0.0295262	-0.254194	-0.756029	-1.27885	-1.27885	-1.27885	-1.27885	-1.27885	-1.27885
chr19:10565649_10566149	1.27248	1.27248	1.27248	1.27248	1.27248	1.27248	1.1737	0.308583	-0.155658	-0.490687	-1.08315	-1.08195	-1.18483	-0.944707	-0.696033	-0.696033	-0.696033	-0.696033	-0.696033	-0.696033
chr15:24954643_24955143	1.21856	1.21856	1.21856	1.21856	1.21856	1.21856	0.547236	0.186268	0.539472	0.413915	-0.11436	-0.462413	-0.632307	-1.11274	-1.11274	-1.11274	-1.11274	-1.11274	-1.11274	-1.11274
chr5:1730124_1730624	1.18955	1.18955	1.18955	1.18955	1.18955	1.18955	0.522276	0.161001	0.23514	0.23514	0.23514	0.160772	-0.369244	-1.18822	-1.18822	-1.18822	-1.18822	-1.18822	-1.18822	-1.18822
chr12:116709090_116709590	1.25403	1.25403	1.25403	1.25403	1.25403	1.25403	1.21331	0.538973	-0.586537	-0.887577	-0.432042	-0.545321	-0.739992	-0.32255	-0.96041	-0.96041	-0.96041	-0.96041	-0.96041	-0.96041
chr8:73356531_73357031	1.25948	1.25948	1.25948	1.25948	1.25948	1.25948	1.1833	0.616663	-0.653504	-0.653504	-0.932875	-1.17777	-0.989015	-1.01637	-0.655634	-0.655634	-0.655634	-0.655634	-0.655634	-0.655634
chr15:49046135_49046635	1.15141	1.15141	1.15141	1.15141	1.15141	1.15141	0.621771	1.06529	0.25809	-0.450155	-0.0130858	-0.206976	-0.240943	-0.785749	-1.19278	-1.19278	-1.19278	-1.19278	-1.19278	-1.19278
chr2:161237810_161238310	1.3197	1.3197	1.3197	1.3197	1.3197	1.3197	0.651916	0.290364	0.0609994	-0.288051	-0.288051	-0.636668	-0.799097	-1.06435	-0.974214	-0.974214	-0.974214	-0.974214	-0.974214	-0.974214
chr9:125889602_125890102	1.12202	1.12202	1.12202	1.12202	1.12202	1.12202	1.08128	0.55792	0.55792	0.308018	-0.221118	-0.637187	-0.510847	-1.12402	-1.12402	-1.12402	-1.12402	-1.12402	-1.12402	-1.12402
chr15:75801983_75802483	1.01917	1.01917	1.01917	1.01917	1.01917	1.01917	1.01917	0.728473	0.951341	0.592576	-0.368168	-0.368168	-0.898714	-0.661216	-1.18506	-1.18506	-1.18506	-1.18506	-1.18506	-1.18506
chr4:74157753_74158253	1.30861	1.30861	1.30861	1.30861	1.30861	1.30861	0.871531	0.272905	-0.644297	-1.5	-0.812543	-0.430354	-0.101028	-0.698202	-0.798405	-0.798405	-0.798405	-0.798405	-0.798405	-0.798405
chr5:170861547_170862047	1.35063	1.35063	1.35063	1.35063	1.35063	1.35063	0.959714	0.00807106	-0.622479	-0.546901	-0.45123	-0.569698	-0.860156	-0.860156	-0.860156	-0.860156	-0.860156	-0.860156	-0.860156	-0.860156
chr17:58007087_58007587	1.21198	1.21198	1.21198	1.21198	1.21198	1.21198	1.19511	0.443476	0.00484582	-0.245261	-0.426533	-0.958825	-0.172492	-0.664337	-1.07464	-1.07464	-1.07464	-1.07464	-1.07464	-1.07464
chr7:151808622_151809122	1.32963	1.32963	1.32963	1.32963	1.32963	1.32963	0.80348	0.279676	-0.350925	-0.921944	-1.20165	-1.15011	-1.02366	-0.922272	-0.581727	-0.581727	-0.581727	-0.581727	-0.581727	-0.581727
chr8:38030206_38030706	0.963358	0.963358	0.963358	0.963358	0.963358	0.963358	0.599762	0.952547	0.946036	0.59663	0.296977	-0.0323168	-0.648582	-0.914936	-1.26271	-1.26271	-1.26271	-1.26271	-1.26271	-1.26271
chr17:73482196_73482696	1.11579	1.11579	1.11579	1.11579	1.11579	1.11579	0.437369	0.437369	0.437369	0.191971	0.0479074	0.142119	0.142119	-0.577371	-1.3256	-1.3256	-1.3256	-1.3256	-1.3256	-1.3256
chr19:12647434_12647934	1.2485	1.2485	1.2485	1.2485	1.2485	1.2485	1.17218	0.42006	-0.0188562	-0.264333	-0.474805	-0.639943	-1.04463	-0.922718	-0.952993	-0.952993	-0.952993	-0.952993	-0.952993	-0.952993
chr4:121071256_121071756	1.23804	1.23804	1.23804	1.23804	1.23804	1.23804	0.99899	0.323228	0.323228	-0.347501	-0.491623	-0.135406	-0.893087	-1.02944	-1.02944	-1.02944	-1.02944	-1.02944	-1.02944	-1.02944
chr9:79571382_79571882	1.09585	1.09585	1.09585	1.09585	1.09585	1.09585	1.08357	0.598804	0.312914	0.261059	-0.30294	-0.744006	-0.299735	0.00954033	-1.24905	-1.24905	-1.24905	-1.24905	-1.24905	-1.24905
chr13:113997726_113998226	1.35948	1.35948	1.35948	1.35948	1.35948	1.35948	0.704852	-0.00377184	-0.0496541	-0.517426	-0.517426	-0.77685	-0.77685	-0.539015	-0.946795	-0.946795	-0.946795	-0.946795	-0.946795	-0.946795
chr17:32487021_32487521	1.19575	1.19575	1.19575	1.19575	1.19575	1.19575	0.804354	1.00108	0.192122	-0.275813	-0.254761	-0.500226	-0.905119	-0.838729	-1.06623	-1.06623	-1.06623	-1.06623	-1.06623	-1.06623
chr3:136751573_136752073	1.24211	1.24211	1.24211	1.24211	1.24211	1.24211	0.563092	0.763395	0.132051	-0.113562	-0.0296817	-0.537246	-0.930894	-0.847816	-1.07533	-1.07533	-1.07533	-1.07533	-1.07533	-1.07533
chr22:28742193_28742693	1.1591	1.1591	1.1591	1.1591	1.1591	1.1591	1.1591	0.970974	0.19705	-0.270903	-0.385697	-0.631171	-1.04065	-0.939138	-1.00236	-1.00236	-1.00236	-1.00236	-1.00236	-1.00236
chr6:3157375_3157875	1.15446	1.15446	1.15446	1.15446	1.15446	1.15446	0.485279	0.838442	0.399259	0.558012	-0.303673	-0.647088	-0.455307	-0.721118	-1.1801	-1.1801	-1.1801	-1.1801	-1.1801	-1.1801
chr1:176207092_176207592	1.26465	1.26465	1.26465	1.26465	1.26465	1.26465	1.18827	0.235121	-0.739316	-1.31119	-1.44303	-1.03668	-0.618244	-0.551831	-0.551831	-0.551831	-0.551831	-0.551831	-0.551831	-0.551831
chr6:107102207_107102707	1.26551	1.26551	1.26551	1.26551	1.26551	1.26551	0.901387	0.225012	-0.229676	0.0917497	-0.0230931	-0.516506	-0.797385	-0.797385	-1.07453	-1.07453	-1.07453	-1.07453	-1.07453	-1.07453
chr1:23177535_23178035	1.20463	1.20463	1.20463	1.20463	1.20463	1.20463	0.825854	0.848435	0.216739	0.216739	-0.809957	-1.05557	-1.13985	-0.850091	-0.913347	-0.913347	-0.913347	-0.913347	-0.913347	-0.913347
chr1:212284983_212285483	1.44421	1.44421	1.44421	1.44421	1.44421	1.44421	0.163735	-0.500872	-0.955778	-0.929216	-0.694416	-0.502668	-0.966597	-0.964479	-0.552494	-0.552494	-0.552494	-0.552494	-0.552494	-0.552494
chr15:90994408_90994908	1.18781	1.18781	1.18781	1.18781	1.18781	1.18781	0.720612	-0.424384	-0.393271	-1.3403	-1.5	-1.5	-1.33827	-0.679994	-0.0536669	-0.0536669	-0.0536669	-0.0536669	-0.0536669	-0.0536669
chr6:157021937_157022437	1.36737	1.36737	1.36737	1.36737	1.36737	1.36737	0.580416	-0.239228	-0.385983	-0.688208	-0.368157	-0.505156	-0.111575	-0.377731	-1.0181	-1.0181	-1.0181	-1.0181	-1.0181	-1.0181
chr4:105146565_105147065	1.27106	1.27106	1.27106	1.27106	1.27106	1.27106	1.05498	0.529774	-0.261597	-0.40848	-0.619381	-0.687538	-0.440456	-1.14079	-0.942143	-0.942143	-0.942143	-0.942143	-0.942143	-0.942143
chr19:8513480_8513980	1.21442	1.21442	1.21442	1.21442	1.21442	1.21442	0.822402	0.747566	0.292373	-0.471426	-0.655489	0.0410093	-0.820537	-0.939962	-1.0504	-1.0504	-1.0504	-1.0504	-1.0504	-1.0504
chr11:92224627_92225127	1.2575	1.2575	1.2575	1.2575	1.2575	1.2575	0.582348	0.773745	0.152856	-0.197614	-0.996463	-0.612877	-0.286832	-0.647175	-1.05216	-1.05216	-1.05216	-1.05216	-1.05216	-1.05216
chr7:134458917_134459417	1.29182	1.29182	1.29182	1.29182	1.29182	1.29182	1.2153	0.260473	-0.715683	-0.970321	-0.777471	-1.16269	-0.800954	-0.9785	-0.636843	-0.636843	-0.636843	-0.636843	-0.636843	-0.636843
chr7:128032499_128032999	1.21484	1.21484	1.21484	1.21484	1.21484	1.21484	0.85004	0.32442	0.32442	0.32442	-0.206998	-0.515954	-1.04867	-1.04867	-1.04867	-1.04867	-1.04867	-1.04867	-1.04867	-1.04867
chr11:59615619_59616119	1.24564	1.24564	1.24564	1.24564	1.24564	1.24564	0.515005	0.223005	0.541304	0.20412	-0.395037	-0.393829	-0.467445	-0.917829	-1.13053	-1.13053	-1.13053	-1.13053	-1.13053	-1.13053
chr14:81170209_81170709	1.35141	1.35141	1.35141	1.35141	1.35141	1.35141	0.142934	0.334481	0.334481	-0.238821	-0.77052	-1.15085	-1.1394	-0.900808	-0.786661	-0.786661	-0.786661	-0.786661	-0.786661	-0.786661
chr8:124973034_124973534	1.32963	1.32963	1.32963	1.32963	1.32963	1.32963	0.964546	0.143496	-0.297012	-0.657528	-0.868762	-0.55463	-0.699646	-1.28478	-0.787242	-0.787242	-0.787242	-0.787242	-0.787242	-0.787242
chr2:207123976_207124476	1.12511	1.12511	1.12511	1.12511	1.12511	1.12511	0.989482	1.01212	0.23582	0.110807	-0.53714	-1.5	-1.30002	-1.11083	-0.748132	-0.748132	-0.748132	-0.748132	-0.748132	-0.748132
chr13:100300709_100301209	1.14596	1.14596	1.14596	1.14596	1.14596	1.14596	0.606701	0.807638	0.807638	-0.22672	0.0939097	-0.452002	-0.733647	-1.11132	-1.11132	-1.11132	-1.11132	-1.11132	-1.11132	-1.11132
chr10:43231461_43231961	1.17015	1.17015	1.17015	1.17015	1.17015	1.17015	0.805023	0.441579	0.356645	0.110249	0.276019	-0.218754	-0.979212	-1.11606	-1.11606	-1.11606	-1.11606	-1.11606	-1.11606	-1.11606
chr12:93441261_93441761	1.32335	1.32335	1.32335	1.32335	1.32335	1.32335	0.641906	0.641906	-0.169974	-0.939083	-0.965611	-0.952859	-0.987022	-0.505899	-0.783912	-0.783912	-0.783912	-0.783912	-0.783912	-0.783912
chr7:149460400_149460900	1.35517	1.35517	1.35517	1.35517	1.35517	1.35517	0.394961	-0.082535	-0.167504	-0.308447	0.1577	-0.364946	-0.898369	-0.925884	-0.989334	-0.989334	-0.989334	-0.989334	-0.989334	-0.989334
chr22:20703032_20703532	1.25967	1.25967	1.25967	1.25967	1.25967	1.25967	0.726912	0.623428	0.00152305	-0.710894	-0.0540414	-0.267849	-0.558424	-0.919356	-1.06655	-1.06655	-1.06655	-1.06655	-1.06655	-1.06655
chr2:237691743_237692243	1.22488	1.22488	1.22488	1.22488	1.22488	1.22488	0.557324	0.395416	0.248299	0.639219	-0.901977	-1.12261	-0.7002	-0.251849	-1.03548	-1.03548	-1.03548	-1.03548	-1.03548	-1.03548
chr17:40552166_40552666	1.27947	1.27947	1.27947	1.27947	1.27947	1.27947	1.20282	-0.00224528	-0.636044	-0.0298404	-0.310965	-1.29538	-1.0477	-0.981054	-0.762738	-0.762738	-0.762738	-0.762738	-0.762738	-0.762738
chr18:54269257_54269757	1.13386	1.13386	1.13386	1.13386	1.13386	1.13386	0.768396	0.960194	0.183079	0.144795	9.42861e-06	-0.0748754	-1.19688	-0.865037	-1.12048	-1.12048	-1.12048	-1.12048	-1.12048	-1.12048
chr14:105490628_105491128	1.19391	1.19391	1.19391	1.19391	1.19391	1.19391	0.17679	-0.869457	-1.5	-1.5	-0.576148	-0.77495	-1.13682	-0.604187	0.0625671	0.0625671	0.0625671	0.0625671	0.0625671	0.0625671
chr11:85680799_85681299	1.31051	1.31051	1.31051	1.31051	1.31051	1.31051	1.07026	0.250985	-0.5617	-0.52939	-0.586342	-1.13302	-1.02922	-1.08897	-0.709277	-0.709277	-0.709277	-0.709277	-0.709277	-0.709277
chr11:61332949_61333449	1.26741	1.26741	1.26741	1.26741	1.26741	1.26741	1.21996	0.262531	-0.210456	-0.784903	-1.26253	-1.31837	-0.598127	-0.779585	-0.688826	-0.688826	-0.688826	-0.688826	-0.688826	-0.688826
chr2:144332363_144332863	1.27634	1.27634	1.27634	1.27634	1.27634	1.27634	0.82934	-0.345651	-1.2084	-1.07177	-1.05188	-1.25985	-1.47757	-0.819024	-0.208878	-0.208878	-0.208878	-0.208878	-0.208878	-0.208878
chr2:136253680_136254180	1.18679	1.18679	1.18679	1.18679	1.18679	1.18679	1.11	1.11	-0.307506	-0.140435	-0.900975	-0.900975	-0.652868	-0.919707	-0.919707	-0.919707	-0.919707	-0.919707	-0.919707	-0.919707
chr1:9910109_9910609	1.27314	1.27314	1.27314	1.27314	1.27314	1.27314	1.14239	-0.153379	-0.760732	-0.78743	-0.387002	0.214782	-0.146643	-0.96459	-0.966044	-0.966044	-0.966044	-0.966044	-0.966044	-0.966044
chr20:63878626_63879126	1.19311	1.19311	1.19311	1.19311	1.19311	1.19311	0.826889	0.533863	0.533863	0.0630176	-0.148873	-0.530486	-1.05461	-1.05461	-1.05461	-1.05461	-1.05461	-1.05461	-1.05461	-1.05461
chr1:26156697_26157197	1.18891	1.18891	1.18891	1.18891	1.18891	1.18891	1.18891	0.824313	0.0101643	-0.116656	-0.650247	-0.650247	-0.795742	-0.795742	-1.02471	-1.02471	-1.02471	-1.02471	-1.02471	-1.02471
chr10:103396353_103396853	1.19404	1.19404	1.19404	1.19404	1.19404	1.19404	0.800006	0.119396	0.863709	-5.44697e-06	-0.744502	-0.136694	-0.788533	-0.545891	-1.12195	-1.12195	-1.12195	-1.12195	-1.12195	-1.12195
chr2:96305356_96305856	1.31804	1.31804	1.31804	1.31804	1.31804	1.31804	0.780004	0.590593	-0.545537	-1.12114	-0.428226	-0.664667	-0.866159	-1.13377	-0.753221	-0.753221	-0.753221	-0.753221	-0.753221	-0.753221
chr13:50248483_50248983	1.16842	1.16842	1.16842	1.16842	1.16842	1.16842	1.03215	0.503642	0.503642	0.14143	-0.270204	-0.53175	-0.814694	-1.0821	-1.0821	-1.0821	-1.0821	-1.0821	-1.0821	-1.0821
chr2:189784154_189784654	1.40018	1.40018	1.40018	1.40018	1.40018	1.40018	0.474808	-0.636018	-1.07895	-0.758826	-0.825129	-1.15446	-1.05143	-0.808336	-0.427119	-0.427119	-0.427119	-0.427119	-0.427119	-0.427119
chr1:202888931_202889431	1.32214	1.32214	1.32214	1.32214	1.32214	1.32214	0.492972	0.0701435	0.0701435	-0.439181	-0.733535	-1.20053	-1.5	-1.31269	-0.545892	-0.545892	-0.545892	-0.545892	-0.545892	-0.545892
chr11:33869592_33870092	1.03112	1.03112	1.03112	1.03112	1.03112	1.03112	0.789849	0.789849	0.743544	0.616416	0.0815307	-0.320894	-0.48509	-1.10492	-1.21617	-1.21617	-1.21617	-1.21617	-1.21617	-1.21617
chr6:33425128_33425628	1.18428	1.18428	1.18428	1.18428	1.18428	1.18428	0.816821	0.489592	0.257555	0.130329	-0.310516	-0.310516	-0.328664	-0.473407	-1.22948	-1.22948	-1.22948	-1.22948	-1.22948	-1.22948
chr5:139439339_139439839	1.16383	1.16383	1.16383	1.16383	1.16383	1.16383	1.08672	0.076842	0.434806	0.401454	-0.101424	-0.599448	-0.455753	-1.03115	-1.1325	-1.1325	-1.1325	-1.1325	-1.1325	-1.1325
chr14:35404462_35404962	1.32212	1.32212	1.32212	1.32212	1.32212	1.32212	0.254681	0.445245	-0.792611	0.263554	0.050863	-0.680486	-0.714868	-1.16854	-0.931758	-0.931758	-0.931758	-0.931758	-0.931758	-0.931758
chr22:42365398_42365898	1.19449	1.19449	1.19449	1.19449	1.19449	1.19449	0.508694	0.711	0.711	0.133593	-0.401912	-0.510018	-0.797652	-1.17306	-1.0581	-1.0581	-1.0581	-1.0581	-1.0581	-1.0581
chr11:45655139_45655639	1.21185	1.21185	1.21185	1.21185	1.21185	1.21185	1.02092	0.654994	0.211424	-0.298561	-0.12137	-0.834169	-0.753132	-1.0216	-1.0216	-1.0216	-1.0216	-1.0216	-1.0216	-1.0216
chr6:18507006_18507506	1.1493	1.1493	1.1493	1.1493	1.1493	1.1493	1.1493	0.783328	-0.0338815	-0.281991	-0.281991	-0.0951637	-0.38459	-0.65287	-1.18299	-1.18299	-1.18299	-1.18299	-1.18299	-1.18299
chr14:50231399_50231899	0.943303	0.943303	0.943303	0.943303	0.943303	0.943303	0.926241	0.66099	0.786923	0.757287	-0.312647	0.154832	0.152568	-1.22892	-1.25952	-1.25952	-1.25952	-1.25952	-1.25952	-1.25952
chr13:109784548_109785048	1.28371	1.28371	1.28371	1.28371	1.28371	1.28371	0.316954	-0.0105535	0.175301	0.107409	0.432633	-0.548052	-0.703824	-0.971941	-1.08337	-1.08337	-1.08337	-1.08337	-1.08337	-1.08337
chr20:1427735_1428235	1.14989	1.14989	1.14989	1.14989	1.14989	1.14989	1.14989	0.783792	0.340014	0.144702	-0.508053	-0.770307	-0.770307	-1.03844	-1.03844	-1.03844	-1.03844	-1.03844	-1.03844	-1.03844
chr20:4052419_4052919	1.16053	1.16053	1.16053	1.16053	1.16053	1.16053	0.792661	0.815471	0.557507	0.0845393	-0.198499	-0.696985	-0.696985	-1.0887	-1.0887	-1.0887	-1.0887	-1.0887	-1.0887	-1.0887
chr3:181929455_181929955	1.31592	1.31592	1.31592	1.31592	1.31592	1.31592	0.6292	0.465379	0.0212392	-0.428889	-0.574714	-0.400214	-0.814332	-0.730312	-1.01048	-1.01048	-1.01048	-1.01048	-1.01048	-1.01048
chr7:76191777_76192277	1.26878	1.26878	1.26878	1.26878	1.26878	1.26878	0.73597	0.73597	-0.0822933	-0.330723	-0.330723	-0.465597	-0.749574	-1.01796	-1.01796	-1.01796	-1.01796	-1.01796	-1.01796	-1.01796
chr12:53499258_53499758	1.19619	1.19619	1.19619	1.19619	1.19619	1.19619	1.11895	0.752496	0.120251	-0.0281008	-0.531835	-0.820086	-1.00615	-1.1575	-0.937526	-0.937526	-0.937526	-0.937526	-0.937526	-0.937526
chr18:57630099_57630599	1.21593	1.21593	1.21593	1.21593	1.21593	1.21593	0.832978	0.00496437	0.00496437	0.00496437	-0.290218	0.0970227	-0.0825771	-0.47462	-1.23217	-1.23217	-1.23217	-1.23217	-1.23217	-1.23217
chr12:56725087_56725587	1.21672	1.21672	1.21672	1.21672	1.21672	1.21672	0.837835	-0.255004	0.103746	0.241283	-0.200611	-0.276083	0.147242	-0.683884	-1.20248	-1.20248	-1.20248	-1.20248	-1.20248	-1.20248
chr4:118335269_118335769	1.25624	1.25624	1.25624	1.25624	1.25624	1.25624	0.887903	0.521258	-0.297456	-0.297456	-0.130226	-0.265175	-0.549308	-0.817841	-1.09819	-1.09819	-1.09819	-1.09819	-1.09819	-1.09819
chr11:22516074_22516574	1.31801	1.31801	1.31801	1.31801	1.31801	1.31801	0.949607	0.265276	-0.373773	-0.373773	-0.373773	-0.636464	-0.920647	-0.920647	-0.920647	-0.920647	-0.920647	-0.920647	-0.920647	-0.920647
chr10:119103772_119104272	1.3588	1.3588	1.3588	1.3588	1.3588	1.3588	0.915582	-0.212949	-0.406525	-0.628917	-0.623078	-0.811274	-0.924336	-1.30064	-0.69344	-0.69344	-0.69344	-0.69344	-0.69344	-0.69344
chr12:117190289_117190789	1.24929	1.24929	1.24929	1.24929	1.24929	1.24929	0.967645	0.672798	0.0335986	-0.377007	-0.640986	-0.75597	-1.16174	-1.3242	-0.818315	-0.818315	-0.818315	-0.818315	-0.818315	-0.818315
chr17:6454552_6455052	1.00229	1.00229	1.00229	1.00229	1.00229	1.00229	0.633688	0.633688	0.633688	0.553197	0.269597	0.321855	-0.216413	-1.02282	-1.30337	-1.30337	-1.30337	-1.30337	-1.30337	-1.30337
chr13:27251067_27251567	1.25975	1.25975	1.25975	1.25975	1.25975	1.25975	0.8633	0.568324	0.10177	-0.147006	-0.611169	-0.983439	-1.15615	-1.31868	-0.812574	-0.812574	-0.812574	-0.812574	-0.812574	-0.812574
chr11:34105365_34105865	1.38187	1.38187	1.38187	1.38187	1.38187	1.38187	0.694077	-0.271087	-0.356845	-0.76765	-0.305033	-1.12061	-0.62559	-0.434546	-0.850658	-0.850658	-0.850658	-0.850658	-0.850658	-0.850658
chr11:110376565_110377065	1.23749	1.23749	1.23749	1.23749	1.23749	1.23749	0.549689	0.549689	0.549689	-0.0294033	-0.313064	-0.697239	-0.697239	-0.697239	-1.10664	-1.10664	-1.10664	-1.10664	-1.10664	-1.10664
chr12:103302164_103302664	1.40504	1.40504	1.40504	1.40504	1.40504	1.40504	0.0677563	0.0677563	-0.0180116	-0.382113	-0.539513	-0.873442	-0.397353	-0.784082	-0.928536	-0.928536	-0.928536	-0.928536	-0.928536	-0.928536
chr2:46699337_46699837	1.21255	1.21255	1.21255	1.21255	1.21255	1.21255	0.970226	0.60315	-0.216526	0.0715874	0.0929188	-0.906325	-0.687048	-0.726701	-1.07943	-1.07943	-1.07943	-1.07943	-1.07943	-1.07943
chrX:155881055_155881555	1.2911	1.2911	1.2911	1.2911	1.2911	1.2911	0.757012	0.0715377	0.0715377	-0.648137	0.215767	-0.413068	-0.593079	-0.974796	-1.0389	-1.0389	-1.0389	-1.0389	-1.0389	-1.0389
chr11:44562769_44563269	1.09958	1.09958	1.09958	1.09958	1.09958	1.09958	0.557723	0.7541	0.7541	0.209912	0.0637056	0.0637056	-0.914418	-0.914418	-1.19531	-1.19531	-1.19531	-1.19531	-1.19531	-1.19531
chr6:158441376_158441876	1.30469	1.30469	1.30469	1.30469	1.30469	1.30469	0.616162	-0.0107318	-0.0107318	-0.259785	-0.0727683	-0.0204437	-0.677015	-0.815343	-1.09624	-1.09624	-1.09624	-1.09624	-1.09624	-1.09624
chr14:67359704_67360204	1.36616	1.36616	1.36616	1.36616	1.36616	1.36616	0.0418023	-0.525882	-1.34661	-1.05812	-0.613732	-1.10918	-1.13601	-1.19635	-0.208813	-0.208813	-0.208813	-0.208813	-0.208813	-0.208813
chr9:131257686_131258186	1.21009	1.21009	1.21009	1.21009	1.21009	1.21009	1.21009	0.8425	0.0216811	-0.558375	-0.842507	-0.977803	-0.977803	-0.854044	-0.854044	-0.854044	-0.854044	-0.854044	-0.854044	-0.854044
chr2:64653727_64654227	1.38627	1.38627	1.38627	1.38627	1.38627	1.38627	0.727083	0.00768395	-0.739181	-0.693097	-0.767259	-0.846238	-0.604758	-0.518265	-0.813932	-0.813932	-0.813932	-0.813932	-0.813932	-0.813932
chr18:56873359_56873859	1.27264	1.27264	1.27264	1.27264	1.27264	1.27264	0.583355	0.392387	0.392387	-0.288805	-0.288805	-0.456534	-0.49109	-1.2221	-1.04277	-1.04277	-1.04277	-1.04277	-1.04277	-1.04277
chr17:82384884_82385384	1.03114	1.03114	1.03114	1.03114	1.03114	1.03114	1.03114	0.866698	0.232146	-0.0171983	0.307277	0.307277	-0.462279	-0.855724	-1.26603	-1.26603	-1.26603	-1.26603	-1.26603	-1.26603
chr3:178245193_178245693	1.19457	1.19457	1.19457	1.19457	1.19457	1.19457	1.00264	0.634791	0.188889	-0.0653637	-0.00848593	-0.829171	-1.11639	-0.693357	-1.04683	-1.04683	-1.04683	-1.04683	-1.04683	-1.04683
chr4:8410513_8411013	1.24915	1.24915	1.24915	1.24915	1.24915	1.24915	0.703156	0.219914	0.346535	0.265809	-0.10488	-1.01221	-1.17753	-0.935867	-0.966634	-0.966634	-0.966634	-0.966634	-0.966634	-0.966634
chr1:174022178_174022678	1.13565	1.13565	1.13565	1.13565	1.13565	1.13565	0.892716	0.91564	0.469562	-0.0433057	-0.508785	-1.23086	-1.5	-1.35432	-0.718732	-0.718732	-0.718732	-0.718732	-0.718732	-0.718732
chr4:117779328_117779828	1.20311	1.20311	1.20311	1.20311	1.20311	1.20311	0.805412	0.805412	0.359197	-0.512552	-0.797088	-0.784177	-0.0023586	-0.610112	-1.0804	-1.0804	-1.0804	-1.0804	-1.0804	-1.0804
chr2:47033212_47033712	1.0653	1.0653	1.0653	1.0653	1.0653	1.0653	0.801279	1.00119	0.36603	0.111572	-0.427211	-0.328783	0.00186466	-0.136759	-1.29683	-1.29683	-1.29683	-1.29683	-1.29683	-1.29683
chr21:40386257_40386757	1.05335	1.05335	1.05335	1.05335	1.05335	1.05335	0.683479	0.683479	0.683479	0.683479	0.268397	-0.232808	-1.00315	-1.15521	-1.15521	-1.15521	-1.15521	-1.15521	-1.15521	-1.15521
chr11:79393615_79394115	1.17921	1.17921	1.17921	1.17921	1.17921	1.17921	1.04179	0.0733919	0.433673	0.432523	-0.0560387	-0.971313	-0.604434	-1.11638	-1.05141	-1.05141	-1.05141	-1.05141	-1.05141	-1.05141
chr2:170685552_170686052	1.18653	1.18653	1.18653	1.18653	1.18653	1.18653	1.18653	0.499289	0.265666	0.0160006	-0.268656	-0.769993	-0.769993	-1.03971	-1.03971	-1.03971	-1.03971	-1.03971	-1.03971	-1.03971
chr7:35261524_35262024	0.981077	0.981077	0.981077	0.981077	0.981077	0.981077	0.761742	0.761742	0.948719	0.583355	0.298681	-0.0868671	-0.836082	-0.836082	-1.24694	-1.24694	-1.24694	-1.24694	-1.24694	-1.24694
chr7:47571193_47571693	1.16129	1.16129	1.16129	1.16129	1.16129	1.16129	0.625778	0.50366	-0.48663	-0.000860421	0.450114	0.450114	-0.530521	-0.682633	-1.21612	-1.21612	-1.21612	-1.21612	-1.21612	-1.21612
chr11:17353460_17353960	1.15262	1.15262	1.15262	1.15262	1.15262	1.15262	1.15262	0.465108	0.465108	-0.0107524	-0.549921	-0.187512	-0.475172	-0.869278	-1.15098	-1.15098	-1.15098	-1.15098	-1.15098	-1.15098
chr9:134419729_134420229	1.05589	1.05589	1.05589	1.05589	1.05589	1.05589	0.836425	0.836425	0.836425	0.254919	-0.116309	-0.429852	-0.448136	-0.600334	-1.25082	-1.25082	-1.25082	-1.25082	-1.25082	-1.25082
chr10:117216562_117217062	1.34868	1.34868	1.34868	1.34868	1.34868	1.34868	0.66803	0.299516	-0.342679	-0.342679	-0.489347	-0.930277	-1.21586	-0.973844	-0.794152	-0.794152	-0.794152	-0.794152	-0.794152	-0.794152
chr9:114587381_114587881	1.41885	1.41885	1.41885	1.41885	1.41885	1.41885	0.199681	-0.0967082	-1.03169	-0.486274	-0.0621078	-0.723018	-1.02241	-0.734028	-0.759425	-0.759425	-0.759425	-0.759425	-0.759425	-0.759425
chr5:143037014_143037514	1.31789	1.31789	1.31789	1.31789	1.31789	1.31789	0.781733	0.247964	0.0140373	-0.668969	-0.343653	-0.607803	-0.607803	-0.607803	-1.01917	-1.01917	-1.01917	-1.01917	-1.01917	-1.01917
chr2:130391118_130391618	1.2749	1.2749	1.2749	1.2749	1.2749	1.2749	0.73098	0.539499	0.0840991	0.00320123	-0.74954	-0.439826	-0.843963	-0.996264	-0.996264	-0.996264	-0.996264	-0.996264	-0.996264	-0.996264
chr17:43905281_43905781	1.37476	1.37476	1.37476	1.37476	1.37476	1.37476	0.400481	0.400481	-0.748612	-0.998725	-0.977286	-1.05323	-0.801993	-1.07266	-0.566174	-0.566174	-0.566174	-0.566174	-0.566174	-0.566174
chr18:44737765_44738265	1.07296	1.07296	1.07296	1.07296	1.07296	1.07296	1.07296	0.70382	0.70382	0.448679	-0.0915508	-0.820708	-0.820708	-0.848643	-1.1309	-1.1309	-1.1309	-1.1309	-1.1309	-1.1309
chr12:52069410_52069910	1.14678	1.14678	1.14678	1.14678	1.14678	1.14678	0.0699121	0.264533	0.769368	0.572434	0.357863	-0.303812	-0.338497	-1.12657	-1.19099	-1.19099	-1.19099	-1.19099	-1.19099	-1.19099
chr15:85380308_85380808	1.3594	1.3594	1.3594	1.3594	1.3594	1.3594	0.68149	0.146894	-1.1025	-1.17099	-0.503847	-0.859949	-1.15508	-0.628677	-0.593953	-0.593953	-0.593953	-0.593953	-0.593953	-0.593953
chr12:48995319_48995819	1.3062	1.3062	1.3062	1.3062	1.3062	1.3062	0.613989	0.0793742	0.0793742	-0.049091	-0.049091	-0.474105	-1.00513	-0.762584	-1.04499	-1.04499	-1.04499	-1.04499	-1.04499	-1.04499
chr13:39928196_39928696	1.20024	1.20024	1.20024	1.20024	1.20024	1.20024	0.663171	0.293801	0.293801	0.463182	0.177671	-0.541835	-0.832189	-1.10272	-1.10272	-1.10272	-1.10272	-1.10272	-1.10272	-1.10272
chr16:66934184_66934684	1.23222	1.23222	1.23222	1.23222	1.23222	1.23222	0.833157	0.124543	-0.350554	-0.351708	-0.0240353	-0.00063095	-0.0353379	-0.30688	-1.21364	-1.21364	-1.21364	-1.21364	-1.21364	-1.21364
chr6:14283502_14284002	0.94628	0.94628	0.94628	0.94628	0.94628	0.94628	0.94628	0.94628	0.498451	0.498451	0.498451	-0.00448427	-0.290784	-1.12827	-1.27368	-1.27368	-1.27368	-1.27368	-1.27368	-1.27368
chr6:33192142_33192642	1.21999	1.21999	1.21999	1.21999	1.21999	1.21999	0.407646	0.0381956	0.3997	0.3997	0.252659	-0.154132	-0.814434	-0.960635	-1.14811	-1.14811	-1.14811	-1.14811	-1.14811	-1.14811
chr4:140359702_140360202	1.18346	1.18346	1.18346	1.18346	1.18346	1.18346	1.18346	0.493946	0.0460602	0.123237	-0.0238182	-0.743552	-0.900776	-1.0399	-1.0399	-1.0399	-1.0399	-1.0399	-1.0399	-1.0399
chr6:34090456_34090956	0.957917	0.957917	0.957917	0.957917	0.957917	0.957917	0.957917	0.957917	0.656486	0.448146	0.448146	0.0612403	-0.922818	-1.1935	-1.1935	-1.1935	-1.1935	-1.1935	-1.1935	-1.1935
chr7:155002829_155003329	1.31868	1.31868	1.31868	1.31868	1.31868	1.31868	0.897319	-0.0749315	-0.121766	-0.668326	-0.070748	-0.365645	-0.907973	-0.638387	-0.993606	-0.993606	-0.993606	-0.993606	-0.993606	-0.993606
chr12:71439458_71439958	1.31598	1.31598	1.31598	1.31598	1.31598	1.31598	-0.250943	-1.18295	-1.5	-0.731986	-1.03808	-1.20669	-0.838317	-0.294608	-0.0921948	-0.0921948	-0.0921948	-0.0921948	-0.0921948	-0.0921948
chr10:22345279_22345779	1.22962	1.22962	1.22962	1.22962	1.22962	1.22962	0.692054	0.692054	0.047773	-0.0808249	-0.0808249	-0.216902	-0.990472	-0.938209	-1.08372	-1.08372	-1.08372	-1.08372	-1.08372	-1.08372
chrX:98652141_98652641	1.32005	1.32005	1.32005	1.32005	1.32005	1.32005	0.627121	0.257406	-0.568163	-0.81881	-1.15184	-1.5	-1.09077	-0.498855	-0.498855	-0.498855	-0.498855	-0.498855	-0.498855	-0.498855
chr6:87472731_87473231	1.32121	1.32121	1.32121	1.32121	1.32121	1.32121	0.638049	-0.0521881	-0.286831	-0.148079	-0.282636	-0.140843	-0.334617	-0.692043	-1.10467	-1.10467	-1.10467	-1.10467	-1.10467	-1.10467
chr6:125528503_125529003	1.18419	1.18419	1.18419	1.18419	1.18419	1.18419	0.646271	0.454163	0.816166	0.232366	-0.184735	-1.00809	-1.00809	-0.765127	-1.04801	-1.04801	-1.04801	-1.04801	-1.04801	-1.04801
chr19:54416106_54416606	1.22395	1.22395	1.22395	1.22395	1.22395	1.22395	1.22395	0.533359	-0.273793	-0.524676	-0.484243	-0.256418	-0.543199	-0.543199	-1.07924	-1.07924	-1.07924	-1.07924	-1.07924	-1.07924
chr16:31010396_31010896	1.2986	1.2986	1.2986	1.2986	1.2986	1.2986	0.484852	0.484852	-0.510257	-0.144296	-0.0720796	-0.240868	-0.527672	-0.578519	-1.11461	-1.11461	-1.11461	-1.11461	-1.11461	-1.11461
chr4:82124334_82124834	1.13492	1.13492	1.13492	1.13492	1.13492	1.13492	0.890608	0.520515	0.0718948	-0.179009	0.434837	0.119945	-0.393501	-1.02115	-1.20895	-1.20895	-1.20895	-1.20895	-1.20895	-1.20895
chr7:112939203_112939703	1.0636	1.0636	1.0636	1.0636	1.0636	1.0636	1.0636	0.620534	0.385728	0.188265	0.040954	0.0539355	-0.364404	-0.635734	-1.28908	-1.28908	-1.28908	-1.28908	-1.28908	-1.28908
chr19:37077952_37078452	1.27623	1.27623	1.27623	1.27623	1.27623	1.27623	0.991971	0.223016	-0.253135	-0.254292	-0.552462	-0.850733	-1.25297	-1.5	-0.67663	-0.67663	-0.67663	-0.67663	-0.67663	-0.67663
chr10:125896281_125896781	1.08468	1.08468	1.08468	1.08468	1.08468	1.08468	0.546406	0.176208	0.996196	0.518029	0.302843	-0.0847045	-0.76922	-0.927914	-1.21098	-1.21098	-1.21098	-1.21098	-1.21098	-1.21098
chr12:104215538_104216038	1.28587	1.28587	1.28587	1.28587	1.28587	1.28587	1.28587	0.312116	-0.801046	-0.801046	-0.760594	-0.664231	-0.664231	-0.560494	-0.843595	-0.843595	-0.843595	-0.843595	-0.843595	-0.843595
chr5:69093695_69094195	1.33157	1.33157	1.33157	1.33157	1.33157	1.33157	1.13839	-0.0777603	-0.396304	-0.912305	-0.81441	-0.575948	-0.871819	-0.932601	-0.757779	-0.757779	-0.757779	-0.757779	-0.757779	-0.757779
chr22:22369785_22370285	1.30801	1.30801	1.30801	1.30801	1.30801	1.30801	0.936021	-0.16767	-0.16767	-0.206637	-0.185119	-0.450365	-0.450365	-1.07832	-1.01299	-1.01299	-1.01299	-1.01299	-1.01299	-1.01299
chr3:129399461_129399961	1.26238	1.26238	1.26238	1.26238	1.26238	1.26238	0.56821	0.772985	0.133978	-0.920135	-1.25376	-1.47966	-1.11062	-0.785997	-0.583215	-0.583215	-0.583215	-0.583215	-0.583215	-0.583215
chr12:56041579_56042079	1.08259	1.08259	1.08259	1.08259	1.08259	1.08259	1.03431	0.343098	0.599462	-0.00219128	0.435783	0.0427551	-0.948125	-0.7434	-1.20953	-1.20953	-1.20953	-1.20953	-1.20953	-1.20953
chr9:92138058_92138558	1.20589	1.20589	1.20589	1.20589	1.20589	1.20589	0.663045	0.176484	0.176484	0.0264953	0.215108	-0.0108682	-0.297988	-0.926325	-1.20962	-1.20962	-1.20962	-1.20962	-1.20962	-1.20962
chr12:6336171_6336671	1.30572	1.30572	1.30572	1.30572	1.30572	1.30572	0.883344	0.512787	-0.483573	-0.962204	-0.63529	-0.534092	-0.281745	-0.661928	-0.945272	-0.945272	-0.945272	-0.945272	-0.945272	-0.945272
chr10:14959071_14959571	1.32314	1.32314	1.32314	1.32314	1.32314	1.32314	0.784248	0.486324	-0.510214	-0.965533	-1.05641	-0.58706	-0.986582	-0.224699	-0.813149	-0.813149	-0.813149	-0.813149	-0.813149	-0.813149
chr7:143885159_143885659	1.22446	1.22446	1.22446	1.22446	1.22446	1.22446	0.52979	-0.00672349	-0.156659	0.587157	-0.156098	-0.655722	0.0336181	-0.238507	-1.21393	-1.21393	-1.21393	-1.21393	-1.21393	-1.21393
chr3:88058258_88058758	1.30223	1.30223	1.30223	1.30223	1.30223	1.30223	0.607514	0.415041	-0.0708671	0.0065556	-0.809109	-0.191386	-0.837428	-0.865478	-1.01137	-1.01137	-1.01137	-1.01137	-1.01137	-1.01137
chr5:138611085_138611585	1.27714	1.27714	1.27714	1.27714	1.27714	1.27714	0.904703	0.904703	-0.913404	-0.713586	-0.929079	-0.786959	-0.682436	-0.578563	-0.811375	-0.811375	-0.811375	-0.811375	-0.811375	-0.811375
chr13:77697387_77697887	1.07768	1.07768	1.07768	1.07768	1.07768	1.07768	1.07698	0.92687	0.624475	0.361406	-0.382104	-0.739606	-0.76667	-0.919802	-1.10794	-1.10794	-1.10794	-1.10794	-1.10794	-1.10794
chr22:23857516_23858016	1.1927	1.1927	1.1927	1.1927	1.1927	1.1927	1.17541	0.0700055	-0.128366	-0.478725	-1.13431	-1.5	-1.5	-1.13666	-0.371562	-0.371562	-0.371562	-0.371562	-0.371562	-0.371562
chr8:144522146_144522646	1.1201	1.1201	1.1201	1.1201	1.1201	1.1201	0.719274	0.421038	0.649683	0.542284	-0.116049	-0.0766511	-0.660555	-1.14479	-1.17581	-1.17581	-1.17581	-1.17581	-1.17581	-1.17581
chr11:111602063_111602563	1.23015	1.23015	1.23015	1.23015	1.23015	1.23015	0.762438	0.585627	-0.277013	-1.12389	-1.5	-1.26068	-1.15407	-1.20388	-0.352641	-0.352641	-0.352641	-0.352641	-0.352641	-0.352641
chr1:9198590_9199090	1.07375	1.07375	1.07375	1.07375	1.07375	1.07375	1.07375	0.702541	0.252568	0.619634	0.0763708	-0.312235	-0.856826	-1.24258	-1.12595	-1.12595	-1.12595	-1.12595	-1.12595	-1.12595
chr10:72354825_72355325	1.27215	1.27215	1.27215	1.27215	1.27215	1.27215	0.721274	0.350008	0.0305855	-0.0292951	-0.363723	-0.480109	-0.28622	-1.03768	-1.08963	-1.08963	-1.08963	-1.08963	-1.08963	-1.08963
chr11:106077701_106078201	1.34625	1.34625	1.34625	1.34625	1.34625	1.34625	0.958295	0.119458	-0.527544	-0.656685	-0.63511	-1.04391	-0.603735	-0.757076	-0.821865	-0.821865	-0.821865	-0.821865	-0.821865	-0.821865
chr10:133067740_133068240	1.17707	1.17707	1.17707	1.17707	1.17707	1.17707	1.09881	0.975684	-0.180873	-0.103313	-0.762201	-1.37907	-0.897392	-1.39161	-0.737073	-0.737073	-0.737073	-0.737073	-0.737073	-0.737073
chr18:26547649_26548149	0.981334	0.981334	0.981334	0.981334	0.981334	0.981334	0.981334	0.981334	0.974653	0.558873	-0.15507	-0.980524	-0.980524	-1.5	-0.924882	-0.924882	-0.924882	-0.924882	-0.924882	-0.924882
chr1:22697725_22698225	1.1353	1.1353	1.1353	1.1353	1.1353	1.1353	1.1353	0.441828	0.441828	0.0830681	0.0830681	-0.640801	-0.640801	-0.640801	-1.17909	-1.17909	-1.17909	-1.17909	-1.17909	-1.17909
chr17:32275140_32275640	1.17318	1.17318	1.17318	1.17318	1.17318	1.17318	0.476503	0.353254	0.429534	0.429534	0.142215	-0.0571582	-0.705023	-0.852118	-1.2093	-1.2093	-1.2093	-1.2093	-1.2093	-1.2093
chrX:129983798_129984298	1.30825	1.30825	1.30825	1.30825	1.30825	1.30825	0.464593	0.27151	0.27151	-0.0973783	-0.384797	-0.494656	-0.643039	-0.790186	-1.07451	-1.07451	-1.07451	-1.07451	-1.07451	-1.07451
chr19:42150157_42150657	0.982536	0.982536	0.982536	0.982536	0.982536	0.982536	0.843748	0.866913	0.866913	0.22556	0.298122	0.157693	-0.601355	-1.3405	-1.20205	-1.20205	-1.20205	-1.20205	-1.20205	-1.20205
chr16:2513634_2514134	1.29642	1.29642	1.29642	1.29642	1.29642	1.29642	0.626989	0.332684	0.0293559	0.296507	-0.79079	-0.72049	-1.02142	-1.12148	-0.901643	-0.901643	-0.901643	-0.901643	-0.901643	-0.901643
chr10:49762185_49762685	1.25648	1.25648	1.25648	1.25648	1.25648	1.25648	0.559289	0.392968	0.392968	0.0239339	-0.192292	-0.458764	-0.747037	-1.26424	-1.04095	-1.04095	-1.04095	-1.04095	-1.04095	-1.04095
chr1:212450275_212450775	1.31922	1.31922	1.31922	1.31922	1.31922	1.31922	0.945481	0.0210159	-0.241066	0.00994313	-0.705151	-0.848317	-1.03063	-1.10921	-0.826232	-0.826232	-0.826232	-0.826232	-0.826232	-0.826232
chr7:103714317_103714817	1.29706	1.29706	1.29706	1.29706	1.29706	1.29706	0.923209	0.384547	-0.0665375	-0.217185	-1.10222	-0.873123	-0.768205	-1.04075	-0.837012	-0.837012	-0.837012	-0.837012	-0.837012	-0.837012
chr16:46884039_46884539	1.40216	1.40216	1.40216	1.40216	1.40216	1.40216	-0.131147	-0.195612	0.244413	-0.542765	-0.433263	-0.449568	-0.43784	-0.472716	-0.999076	-0.999076	-0.999076	-0.999076	-0.999076	-0.999076
chr3:104909180_104909680	1.29804	1.29804	1.29804	1.29804	1.29804	1.29804	1.29804	0.0642984	-0.387059	-0.639493	-0.927308	-0.903714	-0.709259	-0.709259	-0.812412	-0.812412	-0.812412	-0.812412	-0.812412	-0.812412
chr14:73228158_73228658	1.29806	1.29806	1.29806	1.29806	1.29806	1.29806	0.923919	0.551498	-0.280114	-0.649579	-0.649579	-0.552648	-0.701263	-1.21907	-0.868591	-0.868591	-0.868591	-0.868591	-0.868591	-0.868591
chr2:216083888_216084388	1.30879	1.30879	1.30879	1.30879	1.30879	1.30879	1.08258	-0.269277	-0.275977	-0.692896	-0.760476	-0.321411	-0.516526	-0.119285	-0.996578	-0.996578	-0.996578	-0.996578	-0.996578	-0.996578
chr14:44961896_44962396	1.19544	1.19544	1.19544	1.19544	1.19544	1.19544	0.753058	0.676242	0.180641	-0.19247	-0.431631	-0.126333	-0.315439	-0.432976	-1.21396	-1.21396	-1.21396	-1.21396	-1.21396	-1.21396
chr11:115958945_115959445	1.21362	1.21362	1.21362	1.21362	1.21362	1.21362	1.13511	0.440063	0.440063	-0.455431	-0.875344	-0.58083	-0.47582	-1.32014	-0.931563	-0.931563	-0.931563	-0.931563	-0.931563	-0.931563
chr2:196639285_196639785	1.43201	1.43201	1.43201	1.43201	1.43201	1.43201	-0.14672	-0.290215	-0.258255	-0.0308207	-0.542848	-1.28315	-0.879039	-0.793622	-0.727896	-0.727896	-0.727896	-0.727896	-0.727896	-0.727896
chr2:135984838_135985338	1.15604	1.15604	1.15604	1.15604	1.15604	1.15604	0.463253	-0.265639	-0.0360709	0.247224	0.427601	0.56835	0.0327517	-0.889434	-1.24738	-1.24738	-1.24738	-1.24738	-1.24738	-1.24738
chr17:73361191_73361691	1.23471	1.23471	1.23471	1.23471	1.23471	1.23471	1.04033	0.667797	0.216213	-0.495193	-0.45449	-0.844487	-1.03364	-0.929256	-0.929256	-0.929256	-0.929256	-0.929256	-0.929256	-0.929256
chr15:43746077_43746577	1.4244	1.4244	1.4244	1.4244	1.4244	1.4244	0.108144	-0.476247	-0.246528	-0.963377	-1.05478	-0.712553	-1.22151	-1.00713	-0.495398	-0.495398	-0.495398	-0.495398	-0.495398	-0.495398
chr2:85504786_85505286	1.33016	1.33016	1.33016	1.33016	1.33016	1.33016	0.780339	0.405357	-0.56642	-0.455909	-0.876164	-0.776504	-1.06537	-1.33838	-0.681319	-0.681319	-0.681319	-0.681319	-0.681319	-0.681319
chr8:42152139_42152639	1.12161	1.12161	1.12161	1.12161	1.12161	1.12161	1.04302	0.20055	0.882347	0.329975	-0.386779	-0.463537	-0.631055	-0.69227	-1.16865	-1.16865	-1.16865	-1.16865	-1.16865	-1.16865
chr14:100239990_100240490	1.27683	1.27683	1.27683	1.27683	1.27683	1.27683	0.444592	0.647088	0.0184378	0.110748	-0.74604	-0.987754	-0.308867	-0.487445	-1.05862	-1.05862	-1.05862	-1.05862	-1.05862	-1.05862
chr7:101244557_101245057	1.35072	1.35072	1.35072	1.35072	1.35072	1.35072	0.65138	0.351439	-0.46241	-0.570424	-0.45047	-0.507703	-0.666478	-1.24059	-0.868177	-0.868177	-0.868177	-0.868177	-0.868177	-0.868177
chr4:176195345_176195845	1.26396	1.26396	1.26396	1.26396	1.26396	1.26396	1.18528	0.341868	-0.110639	-0.569247	-0.837907	-0.824815	-0.233273	-0.807641	-0.954569	-0.954569	-0.954569	-0.954569	-0.954569	-0.954569
chr15:70377032_70377532	1.10869	1.10869	1.10869	1.10869	1.10869	1.10869	1.10869	0.568279	0.568279	0.568279	-0.42354	-0.814369	-0.814369	-0.814369	-1.09984	-1.09984	-1.09984	-1.09984	-1.09984	-1.09984
chr3:52240455_52240955	1.12616	1.12616	1.12616	1.12616	1.12616	1.12616	0.90376	0.60358	0.680213	0.0909399	-0.359142	-0.181293	-0.364296	-1.16153	-1.16153	-1.16153	-1.16153	-1.16153	-1.16153	-1.16153
chr12:93784311_93784811	1.25653	1.25653	1.25653	1.25653	1.25653	1.25653	0.556563	0.465764	0.418448	0.165258	-0.497431	-0.815194	-0.620156	-0.785572	-1.07114	-1.07114	-1.07114	-1.07114	-1.07114	-1.07114
chr8:48008645_48009145	1.28754	1.28754	1.28754	1.28754	1.28754	1.28754	0.912242	0.538676	-0.295494	-0.778013	-0.587838	-0.220358	-0.642581	-0.642581	-1.00155	-1.00155	-1.00155	-1.00155	-1.00155	-1.00155
chr1:63893073_63893573	1.35848	1.35848	1.35848	1.35848	1.35848	1.35848	0.658314	0.284739	-0.549449	-0.549449	-0.549449	-0.549449	-0.549449	-0.549449	-0.966208	-0.966208	-0.966208	-0.966208	-0.966208	-0.966208
[truncated: 10,421 more rows]

## Sheet: Gene Score
	T.0_5	T.5_10	T.10_15	T.15_20	T.20_25	T.25_30	T.30_35	T.35_40	T.40_45	T.45_50	T.50_55	T.55_60	T.60_65	T.65_70	T.70_75	T.75_80	T.80_85	T.85_90	T.90_95	T.95_100
[truncated: 2,491 more rows]

[truncated: 2 more sheets: Gene Expression, Motif]
