# Supplementary material for: Single Cell Multiome Atlas of the Human Developing Retina
Source: Research Square preprint supplement (doi:10.21203/rs.3.rs-3417373/v1), 2023-10-11
Supplement: Supplementary file 3 [file 528e397789723e111883b6dc.xlsx]

## Sheet: Sheet1
Cell Type	Number of Cells
PRPC	54525
Rod Precursor	37669
RGC Precursor	23463
NRPC	15838
AC Precursor	11821
HC0	7518
BC Precursor	6146
Cone Precursor	4625
FMB	4489
DB3b	3020
ON_MGC	2937
DB2	2476
MG	2154
Rod	1932
AC4	1628
DB1	1627
RBC	1461
DB3a	1374
IMB	1358
OFF_MGC	1152
BB_GB	1006
AC19	989
AC21	988
AC5	874
AC26	841
AC11	786
HC1	773
AC20	771
ML_Cone	758
AC6	713
AC24	671
DB5	670
AC3	645
AC17	562
AC28	558
AC7	527
OFFx	503
AC22	491
AC15	483
DB6	445
AC14	418
S_Cone	374
AC29	374
AC10	342
AC8	305
AC25	300
DB4a	290
AC1	288
AC32	222
AC9	200
AC0	195
AC18	192
AC2	177
AC23	163
AC31	144
AC16	129
AC12	116
AC13	66
AC30	57
