# Supplementary material for: Single Cell Multiome Atlas of the Human Developing Retina
Source: Research Square preprint supplement (doi:10.21203/rs.3.rs-3417373/v1), 2023-10-11
Supplement: Supplementary file 5 [file b2a63fd5fdc47a9c23a75be1.xlsx]

## Sheet: Gene Module
Gene Symbol	Module
DGKB	3
WIF1	3
TF	3
FLT1	3
GABRG3	3
NAV2	3
NFIB	3
CADM1	3
DST	3
SAT1	3
LRRC4C	3
GABRG3-AS1	3
SLC35F1	3
FAP	3
RARB	3
C1orf61	3
SOX5	3
AC087854.1	3
VIPR2	3
AC092422.1	3
TNIK	3
CREB5	3
EPHA3	3
GRIK2	3
GRID2	3
SRGAP1	3
LINC00511	3
APBB2	3
CHL1	3
PROX1	3
CNTN1	3
FAM110B	3
FABP7	3
AL136366.1	3
RLBP1	3
FRMD5	3
HKDC1	3
PRSS35	3
RASGRP1	3
GLIS3	3
STAC	3
LSAMP	3
AC092691.1	3
NFIX	3
ST3GAL1	3
GALNT13	3
WNT5B	3
COBL	3
ARHGEF3	3
NCALD	3
ST8SIA5	3
SCARB1	3
PRKCA	3
PCYT1B	3
ST5	3
QDPR	3
SASH1	3
SLC1A3	3
SEL1L3	3
AC114971.1	3
ALDH1A2	3
CDH23	3
SLAIN1	3
LAMA1	3
HECW2	3
PDGFC	3
KDM5B	3
RGR	3
PPP3CC	3
STK39	3
AC092924.2	3
SIPA1L1	3
SERINC5	3
F3	3
ATP2B2	3
UST	3
LINC01748	3
GUCY1A2	3
CGNL1	3
TRIM2	3
KLHL8	3
TRPM3	3
PTH2R	3
RHBDL3	3
DNER	3
NFIA	3
LINC01619	3
FGF13	3
KCNA2	3
LUM	3
SOX6	3
KCNH8	3
ST8SIA1	3
FAM160A1	3
KIF21A	3
SEMA5B	3
EPAS1	3
NRG1	3
RASGEF1B	3
LIMD1	3
ZC3HAV1	3
CALM1	3
HES5	3
SLC35D1	3
PCDH11Y	3
PROX1-AS1	3
MAPK4	3
AL137017.1	3
AC099792.1	3
CPA6	3
THSD7A	3
RHPN2	3
PLCE1	3
SLC15A3	3
SLC6A1	3
SLC6A11	3
FSIP2-AS1	3
HEY2	3
DUSP16	3
RGS7	3
HDAC9	3
MEF2C	3
SNX10	3
ITGB5	3
NR3C2	3
PCDH17	3
LINC00472	3
AC020611.2	3
KIT	3
NEDD4L	3
GLT1D1	3
NYAP2	3
ST6GAL2	3
MYO5B	3
FSTL5	3
MEI4	3
NAV3	3
CDON	3
DCLK1	3
MINAR1	3
KAZN	3
ABI3BP	3
SAMD5	3
CD44	3
RASD1	3
MTUS2	3
ID2	3
AHCYL2	3
MYO6	3
HEATR5A	3
AC026894.1	3
TMEM26	3
PLCB1	3
PCDH15	3
FSIP2	3
PAG1	3
UBE2D2	3
ANKFN1	3
L3MBTL4	3
ART3	3
DOCK10	3
PCSK2	3
MAML2	3
SV2B	3
AC104002.3	3
PCSK5	3
SLC22A23	3
PLXDC2	3
AC027698.1	3
AC108733.1	3
RFTN2	3
NCOA7	3
UTY	3
GNG7	3
EGR1	3
CPEB4	3
LHCGR	3
PDGFRA	3
AL592156.2	3
GPD1L	3
AC090138.1	3
RGS16	3
MPZ	3
SEMA6A	3
MPPED2	3
MPP7	3
RBFOX1	3
MTTP	3
LIN7A	3
SPTLC3	3
P3H2	3
SPOCK1	3
TSC22D1	3
CRYM	3
THRB	3
FOS	3
AL033504.1	3
ARHGEF28	3
PALMD	3
TSHZ2	3
AC109129.1	3
OSBPL10	3
DLEU1	3
RRH	3
NELL2	3
RCVRN	3
ARHGAP42	3
CDH4	3
USP9Y	3
AC124854.1	3
NOS1AP	3
AC096669.1	3
CLNK	3
ROR2	3
SLC15A2	3
PTPRG	3
RIPOR2	3
MAP3K1	3
SOX9-AS1	3
AC073593.2	3
BTG2	3
NPVF	3
LINC02223	3
AC068587.4	3
AL392086.3	3
PCSK6	3
KREMEN1	3
NFIA-AS2	3
BEST3	3
SOX2-OT	3
SEZ6	3
SRRM4	3
MAN1C1	3
SETBP1	3
CCDC88C	3
FAM222A	3
RPS4Y1	3
AC007432.1	3
ZNF385D	3
SEMA5A	3
CARD18	3
KDM4C	3
CLIP4	3
ANO3	3
PID1	3
EVA1C	3
PPP1R1C	3
OSBP2	3
SFRP1	3
FAM222A-AS1	3
SCN1A	3
AL589935.1	3
RHOJ	3
AC004522.3	3
ZPLD1	3
MYO1E	3
NPAS2	3
NLGN1	3
NFATC2	3
AQP9	3
DUSP10	3
MEF2C-AS2	3
KCNH7	3
MKRN3	3
CHRDL1	3
ACYP2	3
B3GLCT	3
AFAP1	3
CASC17	3
AP001442.1	3
NIPAL2	3
AL353784.1	3
TTC39B	3
FRMPD1	3
CHL1-AS1	3
UBA6-AS1	3
RIMBP2	3
CRY1	3
PDC	3
FUT8	3
FREM1	3
RPS26	3
NLGN4Y	3
GANC	3
AC004231.1	3
RP1	3
GRIP2	3
LINC01237	3
AC025164.1	3
ARID5B	3
AC027288.3	3
SOX13	3
KIF16B	3
PCP2	3
ADGRG7	3
PRKN	3
KCNIP4	3
CASC16	3
TTTY14	3
PRR16	3
AC090673.1	3
AL109930.1	3
HOOK1	3
AC090709.1	3
LRRN3	3
AP001021.3	3
AC078820.2	3
BCAS3	3
LINC02397	3
TIAM1	3
PRKCA-AS1	3
WWOX	3
SCN1A-AS1	3
SVIL	3
DPP10	3
GSAP	3
EGF	3
PTN	3
OPHN1	3
ARHGAP31	3
ESYT2	3
ATXN1	3
NRXN3	3
VWA5B1	3
PDE3A	3
MEF2C-AS1	3
AC007376.2	3
AL122014.1	3
FUT10	3
ABCG1	3
BBOX1-AS1	3
HMGA2	3
MAEL	3
BASP1-AS1	3
METTL24	3
AC091826.2	3
NFASC	3
ZFY	3
UBE2G1	3
NEUROD4	3
PLAAT3	3
AC114316.1	3
SESN1	3
ABTB2	3
CYP26A1	3
LINC02283	3
LINC01885	3
UNC80	3
LINC01387	3
SGTB	3
MTCL1	3
VGLL3	3
GNB3	3
CACNA1B	3
PLPP1	3
AC061958.1	3
AC010260.1	3
WNK2	3
CRPPA	3
AL050309.1	3
DDX3Y	3
G6PC2	3
TTTY10	3
AC078923.1	3
AIPL1	3
IFT88	3
IFFO2	3
LNCAROD	3
ITSN1	3
AL451127.2	3
LMO1	3
LINC02060	3
CSMD2	3
NWD2	3
NRL	3
DDAH1	3
VEGFC	3
ABCC1	3
MYH14	3
SOX5-AS1	3
STAT3	3
SLC6A12	3
SATB2	3
AC084361.1	3
AL139246.5	3
ARHGAP28	3
SNCAIP	3
ATP11A	3
CLIP1	3
SLC1A4	3
DPH6	3
PDE6H	3
AMPD3	3
FRY	3
DIRC3	3
ACSL6	3
AAK1	3
BFSP1	3
RNF144B	3
NR4A1	3
LINC02231	3
AL445123.2	3
GRIK1	3
KSR1	3
ALPK2	3
AC010974.2	3
CPLX1	3
CAPN3	3
GNGT2	3
IL1RAPL1	3
SH2D3C	3
SNTB1	3
SPATA12	3
SYT16	3
LINC01135	3
NTN4	3
RCAN2	3
CORO2B	3
AC018616.1	3
EPHB1	3
LRRC1	3
GAS1RR	3
KLKB1	3
SAMD9L	3
CTTNBP2	3
TLL2	3
AL451062.1	3
CADM2	3
NCKAP5-AS2	3
EPHA7	3
SGMS1	3
AC004160.1	3
ME1	3
ARHGEF37	3
BBOX1	3
CFAP161	3
MYRFL	3
GRIA4	3
MIR100HG	3
CTNNA2	3
BMP2	3
CA2	3
RDH10-AS1	3
PTGDS	3
LINC01945	3
AC022874.1	3
PRKY	3
MIR31HG	3
LINC00934	3
HMGA2-AS1	3
RPS6KA3	3
AC020637.1	3
VSTM4	3
PRR5L	3
LINC01563	3
AC002460.2	3
MITF	3
AC108721.2	3
C5orf46	3
LINC01473	3
C12orf42	3
MME	3
PCAT1	3
MAOA	3
PGM1	3
AL139353.2	3
ST8SIA4	3
LINC02055	3
GPR137C	3
IFIH1	3
CRYAB	3
RUBCNL	3
ROM1	3
INPP1	3
GTDC1	3
CHL1-AS2	3
LIMS1	3
DCC	3
MAMDC2	3
SLC46A3	3
PCBP3	3
LINC02774	3
ABCB9	3
SHROOM4	3
EIF1AY	3
AC016831.7	3
ASRGL1	3
ADAMTS6	3
ARHGEF3-AS1	3
STK33	3
LLGL2	3
MEGF10	3
PLA2R1	3
TMPRSS11D	3
PC	3
CABP5	3
GRHL1	3
LINC00609	3
SLC2A1-AS1	3
CCDC91	3
CYTH1	3
AP002383.2	3
GMPR	3
FGD3	3
SCN9A	3
AC125613.1	3
AC008050.1	3
GNAT1	3
AL513164.1	3
AC011346.1	3
SYNDIG1	3
AL139393.1	3
KDM5D	3
COBLL1	3
LINC00513	3
KCNH1	3
GADD45G	3
CHST9	3
ADAM23	3
TMEM74	3
LINC02672	3
AC091906.1	3
CCNJL	3
PRMT3	3
MCPH1	3
DIAPH2-AS1	3
AC093801.1	3
AL139807.1	3
MLXIP	3
KLHL13	3
AC084364.3	3
MRTFA	3
SORL1	3
AL390783.1	3
TBL1Y	3
AP000779.1	3
LINC02328	3
ATP8A1	3
ZBTB20-AS5	3
KPNA3	3
PXK	3
AC009495.1	3
TSPAN7	3
ADAMTS12	3
AC008056.1	3
C19orf18	3
ERBB3	3
APOE	3
EFHC2	3
ARFGEF3	3
PCP4	3
NCOA3	3
SCAMP5	3
AL078459.1	3
AC023424.3	3
CNMD	3
INTS6	3
TBC1D4	3
LERFS	3
DARS-AS1	3
C2orf88	3
MAP2K6	3
TRIM67	3
ZFY-AS1	3
SLC9A7	3
GAREM1	3
LINC02615	3
AC096576.2	3
AC023136.1	3
PLA2G4C	3
LRRC28	3
DIAPH2	3
AC027117.2	3
AL365259.1	3
EYA2	3
HUNK	3
KIAA1549L	3
CERS4	3
AC022146.2	3
MTSS1	3
AC022101.1	3
RAX2	3
UBE2F	3
STX8	3
AC084880.2	3
PTPN11	3
BTBD9	3
FBLIM1	3
AL133304.3	3
TMOD2	3
TMPRSS11A	3
OSTM1-AS1	3
CRX	3
AC011900.1	3
KHDRBS2-OT	3
LINC02388	3
AC021231.1	3
IMPG2	3
DTWD2	3
CADPS	3
NR2E3	3
ANGPT2	3
TMLHE-AS1	3
AQP4-AS1	3
SLC7A11	3
ADAM12	3
LINC02391	3
CBL	3
EML6	3
SLC35E4	3
LINC02389	3
SLC35D2	3
C7orf31	3
CUBN	3
AC005884.1	3
HS3ST3B1	3
KCND3	3
APBA1	3
HHAT	3
SHOC1	3
DHRSX	3
AC005842.1	3
SLC39A11	3
AL590666.4	3
PAPSS1	3
KLHL4	3
GPX3	3
STAC2	3
LINC02823	3
IFI16	3
AL139317.5	3
CRADD	3
IL1R1	3
CCDC3	3
ITSN2	3
CRTC3	3
ATP9A	3
RETREG1	3
NR4A3	3
AC016821.1	3
RBP3	3
STOX2	3
SMAD6	3
GNA14-AS1	3
ATG10	3
CNNM2	3
CSNK1G1	3
BTD	3
MAP3K5	3
AC069272.1	3
LPCAT2	3
PRPH2	3
SOX21-AS1	3
AL355674.1	3
TET2	3
ELMOD1	3
SLC2A9	3
INHBA	3
LINC02842	3
CDH18	3
TMEM244	3
HEATR3	3
LINC02503	3
HS3ST5	3
RAPGEF4	3
NRSN1	3
AC018731.1	3
AF165147.1	3
OTX2	3
AC073571.1	3
TAOK3	3
PDZD2	3
LINC02144	3
CCN1	3
AL731574.1	3
AC109462.1	3
KIF13B	3
IL15	3
TMEM72-AS1	3
BRMS1L	3
PIK3R3	3
IDE	3
AP001831.1	3
BMPER	3
AC096576.3	3
A2M	3
MTM1	3
CYP27A1	3
RNF43	3
TENT5A	3
TRIM9	3
KDM7A	3
TRMT11	3
ENTPD3-AS1	3
SCFD2	3
FAM222B	3
NCOA7-AS1	3
HES1	3
RNF150	3
RHBDL2	3
AC110296.1	3
LINC02762	3
AC119673.2	3
SLC8A1	3
PDZRN3	3
SORBS1	3
CDH20	3
ZEB1	3
NNAT	3
ASCL1	3
DAB1	3
CKB	3
TLL1	3
DLEU2	3
ATRNL1	3
THSD7B	3
KCTD8	3
FOXO1	3
NHS	3
SMOC1	3
NRP1	3
TMEM178B	3
BRINP1	3
UNC5D	3
HMGB1	3
SEMA6D	3
RPL7	3
RPL10	3
RPS16	3
RPS11	3
H3F3A	3
GAPDH	3
RPL7A	3
RPL19	3
RPL13A	3
EEF1A1	3
RPS3A	3
RPL3	3
RPS27A	3
EEF1G	3
RPLP0	3
RPL15	3
RPL11	3
RPLP1	3
RPL27A	3
RPS13	3
PTMA	3
RPS10	3
RPL28	3
RPL18A	3
RPS15	3
RPS9	3
RPS28	3
RPL18	3
RPL24	3
FAU	3
RPL6	3
RPL10A	3
TPT1	3
BTF3	3
RPL29	3
RPS7	3
SLC25A6	3
RPL5	3
RPS18	3
RPS14	3
RPL30	3
RPL9	3
RPL13	3
RPL8	3
RACK1	3
MIF	3
RPS5	3
NACA	3
RPSA	3
RPS24	3
RPL32	3
RPS25	3
RPS6	3
RPL41	3
RPS27	3
RPL17	3
MARCKS	3
RPS23	3
RPL4	3
RPS3	3
RPL22	3
RPLP2	3
COLGALT2	3
ACTB	3
TMSB4X	3
RPS20	3
RPL37A	3
RPS19	3
UBA52	3
RPL14	3
RPL35	3
RPS8	3
RPS12	3
RPL12	3
RPL23	3
RPS15A	3
RPL36	3
RPL26	3
RPL27	3
RPS29	3
RPL35A	3
ACTG1	3
RPS4X	3
CCND1	3
ARL17B	3
NES	3
DOCK5	3
SNHG29	3
EEF2	3
PFDN5	3
RPL38	3
HNRNPA1	3
RPL23A	3
HIST1H4C	3
RPL36A	3
CRABP1	3
RPL21	3
RPL34	3
RPL31	3
GNA14	3
RPS17	3
HIP1	3
BCL11B	3
RPL37	3
FTL	3
EEF1B2	3
ATP5F1E	3
FTH1	3
RPL39	3
FGF10	3
RPS2	3
C12orf57	3
ADAMTS15	3
PCDH19	3
SEMA3A	3
APCDD1L-DT	3
LRCH1	3
ZEB1-AS1	3
LINGO2	3
OTUD7A	3
LINC00861	3
TAF3	3
GATA3	3
AC016042.1	3
VSTM2B	3
SLC8A1-AS1	3
SH3RF3	3
LHFPL2	3
LARP1B	3
PHACTR2	3
PRKX	3
NME2	3
NOP53	3
RPS21	3
PPDPF	3
SET	3
TMEM131L	3
FGF10-AS1	3
DOCK11	3
GCNT2	3
YBX1	3
TMCC3	3
SORT1	3
LIN52	3
FOLH1	3
CBFA2T2	3
LINC01488	3
SMIM14	3
TANGO6	3
BCL2L1	3
SPATA1	3
CLIP2	3
KLHDC8A	3
MFSD6	3
ADGRG2	3
AC119150.1	3
TCP11L2	3
SCG2	3
LRTM1	3
AC011933.4	3
PTPN7	3
TMEM120B	3
PTCSC3	3
PADI2	3
AMZ1	3
TRIP4	3
ARHGEF11	3
OTX2-AS1	3
SPAST	3
AP001604.1	3
PPARA	3
UBOX5-AS1	3
AC015983.2	3
COX10-AS1	3
AC053527.2	3
CADM2-AS2	3
CYP2J2	3
STARD13-AS	3
AL589693.1	3
AC108721.1	3
C8orf86	3
BORCS5	3
AC025887.2	3
LRGUK	3
FAM106A	3
AL445526.1	3
SLC12A6	3
AC092819.1	3
AC011416.4	3
TTPA	3
AL158077.2	3
AL590807.1	3
AC005695.2	3
AL160254.1	3
RHOBTB1	3
SLC24A3	3
AC011369.1	3
AC131011.1	3
SCN8A	3
COL10A1	3
MROH7	3
WDR17	3
DUBR	3
AL136114.1	3
PRKAR2A	3
RNF152	3
LINC00290	3
AC092819.3	3
TNFRSF12A	3
AC113615.2	3
AC073167.1	3
MME-AS1	3
AP003086.1	3
KRT39	3
TSHR	3
PTMS	3
PLEKHD1	3
SAG	3
PACS1	3
HIST1H2AC	3
AL158195.1	3
STX12	3
C5orf56	3
RNF217-AS1	3
AC026689.1	3
NKD1	3
LINC01850	3
AP000229.1	3
NTN1	3
MMD2	3
FAM118B	3
TNR	3
GRID2IP	3
DSTYK	3
AC009690.2	3
ZNF341	3
LRRC69	3
DDX10	3
ANO2	3
AP003059.1	3
CADM2-AS1	3
LARGE1	3
SUSD6	3
AC023905.1	3
EFCAB2	3
MEGF9	3
LINC01485	3
AC025259.3	3
AP006621.4	3
ATP6V1A	3
LINC02488	3
AC004832.1	3
PMP2	3
CASC19	3
APCDD1L	3
GRIN2A	3
FBXO27	3
WIPF2	3
PAK3	3
HIF1A-AS1	3
AC005920.2	3
PLPP7	3
AP001605.1	3
CTH	3
EIF2B3	3
AL049828.1	3
AL161757.4	3
KDM1B	3
AATF	3
AC016493.1	3
PLEKHA2	3
LINC00894	3
LINC02316	3
AP3S2	3
ABL2	3
DCAF1	3
TRPV4	3
MPPED2-AS1	3
AC018362.1	3
CREBL2	3
ZFPM2-AS1	3
KANK2	3
AC016723.1	3
VAX2	3
C16orf74	3
AC023480.1	3
B3GALT5	3
GRM7	3
NEUROG2	3
LINC00882	3
AFG1L	3
AC091646.1	3
AC034195.1	3
PRKACB	3
LRIG2-DT	3
DOCK9	3
ZNF438	3
PRKG1	3
SYTL2	3
DGLUCY	3
AR	3
AC009137.1	3
CRISPLD2	3
DCN	3
STARD13	3
NFE2L3	3
AL445647.1	3
AC008115.2	3
LINC00397	3
LINC01789	3
PSG1	3
ATCAY	3
BTC	3
F5	3
CARTPT	3
LINC02080	3
SEC14L4	3
AC105384.1	3
AC093295.1	3
PTGER3	3
ZSWIM5	3
AC024257.1	3
SLC39A14	3
GPR155	3
PRKG1-AS1	3
ZNF713	3
LINC00844	3
INHBB	3
AC007991.3	3
LINC02105	3
AC092040.1	3
AC104383.2	3
ABCA8	-1
FRG1-DT	-1
MEIKIN	-1
IRAK2	-1
EEF2K	-1
AP002518.1	-1
GNPTAB	-1
CERS3	-1
AC097450.1	-1
C5orf47	-1
DPP10-AS1	-1
AC104819.3	-1
AC007406.4	-1
PRR34-AS1	-1
AC080132.1	-1
ATP13A5	-1
P3H2-AS1	-1
ITGAD	-1
DAP3	-1
UBE2E2	-1
ZNF763	-1
AL139021.1	-1
SEM1	-1
AC087490.1	-1
DCHS2	-1
AL109806.2	-1
AC011586.2	-1
AC008438.2	-1
CHIT1	-1
C2orf76	-1
WWC2	-1
LINC01429	-1
ZC2HC1B	-1
AC012291.3	-1
Z99758.1	-1
FRMD6-AS2	-1
AL049828.2	-1
AP001269.4	-1
AL355835.1	-1
TFAP2A	-1
AF279873.3	-1
AC117386.1	-1
MYO1F	-1
LINC00276	-1
LINC01339	-1
AL138778.1	-1
SMIM9	-1
AL139316.1	-1
AC131956.2	-1
CYP4X1	-1
AC079910.1	-1
AL137781.1	-1
LINC02687	-1
LINC01640	-1
AC092138.2	-1
LINC01484	-1
HELQ	-1
AP4E1	-1
NXF5	-1
TRIM50	-1
AC090517.5	-1
MIR548A1HG	-1
INVS	-1
PCDH7	2
ADGRB3	2
LINC01414	2
KIAA1217	2
CNTN5	2
ROBO2	2
NALCN-AS1	2
FIGN	2
COL25A1	2
MDK	2
PLEKHG1	2
AGBL4	2
ESRRG	2
MEG8	2
SHROOM3	2
MIR924HG	2
LGR5	2
TOX	2
DNAH11	2
ZFHX4	2
MAN2A1	2
CFAP47	2
MAN1A1	2
SLF1	2
PDLIM5	2
NHSL1	2
HHIP	2
MIR217HG	2
AHI1	2
PTPRO	2
XIST	2
MEIS1	2
CABLES1	2
LINC01515	2
UTRN	2
COL9A1	2
PALLD	2
CFAP299	2
DNAH14	2
PTPRM	2
COL23A1	2
MYO16	2
FRMD4B	2
ADGRV1	2
AC009518.1	2
TENM3	2
ADAMTS3	2
SPAG17	2
ANOS1	2
MAGI3	2
AC233296.1	2
PLXNC1	2
EPHA6	2
KCNT2	2
COL11A1	2
NALCN	2
MDGA2	2
RFC3	2
COL13A1	2
NEAT1	2
GFRA1	2
FOXN4	2
TEKT1	2
DCDC1	2
ARHGAP6	2
AL136524.1	2
KCNQ1OT1	2
ADGB	2
FRRS1L	2
PDE7B	2
SYNPO2	2
EGFR	2
LINC01876	2
GNAI1	2
SDK1	2
ADD3	2
ZNF730	2
KIRREL3	2
HYDIN	2
2023-03-03	2
TBX5	2
CP	2
TMEM232	2
AL591501.1	2
PRAG1	2
CNTN3	2
S1PR3	2
PTPRN2	2
FBXL7	2
VLDLR-AS1	2
CTNNA3	2
NKAIN3	2
TEX9	2
TSHZ3	2
AC011306.1	2
DPYD	2
PRTG	2
CEP112	2
NUP62CL	2
EPB41L3	2
AC021055.1	2
HMGCS1	2
MIS18BP1	2
DIAPH3	2
CENPK	2
BRIP1	2
MMS22L	2
TMEM132D	2
PRKAA2	2
CLRN1	2
CFAP54	2
CALCRL	2
CYP1B1	2
FBN1	2
DANT2	2
PLEKHG4B	2
ZBTB16	2
SCLT1	2
PLEKHA6	2
AMPH	2
DTNA	2
AC011447.3	2
CEP135	2
ANK3	2
MIR4500HG	2
LRRC6	2
MAP1B	2
CDS1	2
SGSM1	2
VRK2	2
ZFHX3	2
TMEM178A	2
FAM155A	2
CA8	2
LEF1	2
AC010615.2	2
KIF26B	2
LCA5	2
CEP128	2
LINC01572	2
PKP4	2
RGS22	2
SPSB4	2
LINC01995	2
DOK5	2
CHST11	2
C3orf67	2
EFNA5	2
RALYL	2
RMST	2
CPAMD8	2
LRP2	2
FBN2	2
NPAS3	2
CADPS2	2
CNTNAP3B	2
PTPRQ	2
CDH6	2
BOC	2
NRIP1	2
GPC6	2
RELN	2
KCNB2	2
LTBP1	2
OPCML	2
CPE	2
ERC2	2
DAPL1	2
LPAR1	2
ZIC1	2
SLC38A1	2
LINC02082	2
LRRTM4	2
FRAS1	2
CNTNAP3	2
PDE4D	2
NR2F1	2
NPFFR2	2
LHX9	2
CACNB2	2
CAMK4	2
HMX1	2
TRPS1	2
IQGAP2	2
LZTFL1	2
IFITM2	2
SYNPR	2
KSR2	2
CPNE5	2
MIR503HG	2
CYYR1	2
AC087477.2	2
CCDC175	2
HIVEP2	2
AC098588.3	2
LINC01621	2
ADARB2	2
SEMA3D	2
PRLR	2
ALCAM	2
STK32B	2
CPEB1	2
MAATS1	2
CLVS2	2
DSG2	2
NEK5	2
RAD51B	2
MYO3A	2
PDE10A	2
NMD3	2
ELMO1	2
RBMS1	2
TTC39C	2
PPP2R2B	2
JAZF1	2
RRAS2	2
NR2F2	2
HELLS	2
GLYATL2	2
KNTC1	2
ATAD5	2
FBLN7	2
DTL	2
BRCA2	2
XRCC2	2
C21orf58	2
ATAD2	2
TMPO	2
NSD2	2
POLQ	2
AP001347.1	2
CHEK1	2
FUT9	2
IKZF2	2
COL19A1	2
CXADR	2
SH3GL3	2
PWRN1	2
CCDC33	2
CFAP69	2
GPC4	2
KANK1	2
ANO1	2
AL365295.1	2
CERKL	2
RTN1	2
ST6GAL1	2
AC004943.2	2
TSIX	2
LINC00648	2
AL162493.1	2
ZNF423	2
KATNAL2	2
PAWR	2
WASF3	2
AC093765.3	2
PLOD2	2
KIF5C	2
KCNN2	2
MCTP1	2
PLPP4	2
LDB2	2
EDIL3	2
GNG12	2
ZNF732	2
TTC29	2
PTPRD	2
CFAP61	2
AC007319.1	2
COL6A6	2
AC022034.1	2
MIPOL1	2
KBTBD12	2
LINC01994	2
TMEM45A	2
MAP7	2
PLEKHH2	2
FREM2	2
IGFBPL1	2
RSPH9	2
CCDC171	2
LMBRD1	2
ADAM19	2
GPD2	2
CCDC150	2
KITLG	2
ALDH1A1	2
FAR2	2
AC007656.2	2
PCNX2	2
ARHGAP24	2
SPARC	2
LIN28B	2
SLIT2	2
DOK6	2
TBX20	2
TENM1	2
ADAMTS9-AS2	2
AL137139.2	2
SYT7	2
RASGRF2	2
COLEC12	2
PACRG	2
CCDC148	2
FGF19	2
SYT17	2
AC087280.2	2
SCN7A	2
LINC02595	2
LRRC34	2
EFCAB6	2
CCDC30	2
RBPMS	2
FANCB	2
2023-03-11	2
MIR222HG	2
ANKH	2
AC069133.1	2
SIMC1	2
PAM	2
ENKUR	2
AC079380.1	2
PKIA	2
ZNF99	2
LINC00271	2
AC104041.1	2
FMN2	2
TMEM241	2
ARSG	2
C9orf135	2
LINC02301	2
ZRANB3	2
MTBP	2
BCAR3	2
LINC01320	2
AC090578.1	2
ZNF98	2
RPS6KA6	2
SH3BGRL2	2
SLC4A4	2
STXBP5	2
TTLL9	2
LINC01798	2
SLC44A5	2
DCDC2	2
TEX15	2
CHST15	2
AC022034.3	2
WIPF1	2
ABCA5	2
ICA1	2
CEP126	2
LINC01289	2
AL078600.1	2
PPM1L	2
DNAI1	2
ZNF90	2
SPATA18	2
CYP27C1	2
RGS20	2
RADX	2
FHIT	2
DOCK4	2
AFF3	2
N4BP2L1	2
NUAK1	2
RASAL2	2
ANKS1B	2
AC113386.1	2
NOX4	2
GHR	2
TRIM36	2
AL160191.1	2
AL138828.1	2
IL17RD	2
PLXNA4	2
ZBBX	2
ONECUT2	2
GREB1	2
MRC2	2
ZGRF1	2
ITGA9	2
FAM171B	2
PPIL6	2
COTL1	2
MAST4	2
CFAP206	2
HIVEP3	2
CYP1B1-AS1	2
ACSL4	2
LRRIQ1	2
MGLL	2
AC097634.3	2
GJC1	2
AC073529.1	2
NXPH2	2
LAMA2	2
TTN-AS1	2
STEAP2	2
TAFA4	2
C10orf67	2
FANCM	2
EFCAB11	2
ARMC4	2
IGDCC3	2
TENM3-AS1	2
BACE2	2
SPEF2	2
AP001636.3	2
GUCY1B1	2
ELOVL6	2
SLCO5A1	2
PLAGL1	2
ZC3H12B	2
COL21A1	2
FOXG1-AS1	2
PLSCR4	2
TAFA2	2
GSTO2	2
LINC01517	2
LINC00476	2
NR2F2-AS1	2
PRELID2	2
LINC00535	2
AC015631.1	2
DZANK1	2
ATOH7	2
LBR	2
HCN1	2
CACNA1C	2
PARP8	2
CRTAC1	2
WNT5A	2
SIPA1L2	2
NEGR1	2
AC073365.1	2
AL591378.1	2
KCNMB4	2
CLYBL	2
USP53	2
TSBP1-AS1	2
COL4A6	2
AK7	2
WARS2-AS1	2
ONECUT1	2
ANKRD30BL	2
UMAD1	2
MAP3K20	2
NRK	2
TTLL7	2
SGO1-AS1	2
AKAP12	2
DNAH7	2
SLC44A3	2
ARHGAP29	2
ASIC2	2
ZNF257	2
MYO5C	2
SLC27A6	2
ZMAT4	2
PLCH1	2
DOCK3	2
JAM3	2
BCO2	2
NSUN7	2
LINC02062	2
PHLDB2	2
CDKL2	2
SMAD3	2
CEMIP2	2
LURAP1L	2
RNASEH2B	2
MBNL3	2
CFAP300	2
MMP16	2
C18orf54	2
TTC6	2
SHB	2
PLSCR1	2
CNTRL	2
RUNDC3B	2
AL049874.3	2
AL133346.1	2
RRM2	2
EZH2	2
SMC4	2
RTKN2	2
Z94721.1	2
KIF15	2
MELK	2
KIF11	2
KNL1	2
LMNB1	2
NCAPG	2
NUSAP1	2
ASPM	2
TOP2A	2
CIP2A	2
MKI67	2
NDC80	2
PARPBP	2
E2F7	2
KIF20B	2
GEN1	2
DNA2	2
RAD51AP1	2
BLM	2
VRK1	2
CCDC18	2
NUF2	2
CENPI	2
ECT2	2
KIF14	2
TPX2	2
APOLD1	2
CDC25C	2
ANLN	2
BUB1B	2
KIF18A	2
DEPDC1B	2
ARHGAP11B	2
KIF23	2
CIT	2
MND1	2
KIF24	2
CDK1	2
CKAP2	2
CENPF	2
PLK4	2
STIL	2
SKA3	2
CEP192	2
BUB1	2
NEIL3	2
SGO1	2
CKAP5	2
GTSE1	2
CENPE	2
TTK	2
PBK	2
KIFC1	2
KIF18B	2
RACGAP1	2
SMC2	2
EXO1	2
CKAP2L	2
CDCA2	2
MSH5	2
CENPU	2
BARD1	2
BRCA1	2
RBL1	2
CENPP	2
PRIM2	2
AC008543.1	2
CDC7	2
GINS1	2
CEP152	2
FANCD2	2
WDHD1	2
NDUFAF6	2
PBX3	2
CENPJ	2
RAD18	2
RTTN	2
PDE3B	2
MYBL1	2
POLE2	2
CHAF1A	2
ZNF367	2
FANCI	2
MCM10	2
NCAPG2	2
SYNE2	2
MASTL	2
AURKB	2
RAD21	2
PDE8A	2
TUBA1B	2
TUBB	2
HMGB2	2
ESCO2	2
NUCKS1	2
CLSPN	2
SGO2	2
POLD3	2
UBE2T	2
DBF4	2
HP1BP3	2
REXO5	2
TACC3	2
FANCA	2
FAM111B	2
PRC1	2
ARHGAP11A	2
KIF4A	2
TRIM59	2
DLGAP5	2
DEPDC1	2
PCLAF	2
UHRF1	2
WDR76	2
RRM1	2
FBXO5	2
CENPO	2
CHEK2	2
SHCBP1	2
NCAPD3	2
SKA2	2
OIP5	2
RGS3	2
ZNF492	2
ZNF695	2
KIAA1841	2
GLRA2	2
AC099788.1	2
PBX4	2
SLC2A13	2
KIAA0586	2
SOX11	2
UACA	2
SLC8A3	2
MGAT4C	2
AC011139.1	2
ST3GAL6	2
CFAP221	2
POLA2	2
XYLB	2
DHFR	2
CDC45	2
PTPDC1	2
SLCO3A1	2
C15orf41	2
CEP78	2
DEUP1	2
CACNA1A	2
RPH3AL	2
AF233439.1	2
CFAP43	2
ZHX1	2
STXBP5L	2
AC004540.1	2
DDB2	2
ZNF724	2
AC123912.1	2
GADD45A	2
AC008014.1	2
RAD54B	2
WDR66	2
AC132153.1	2
HES6	2
AC104073.4	2
AC246817.2	2
AC105052.5	2
KCNQ5	2
LRFN5	2
LGR6	2
TRAF3IP1	2
LINC01307	2
ABCC4	2
CARMIL1	2
MMRN1	2
CTNND2	2
SLC25A21	2
ZNF208	2
PRKD1	2
CFAP74	2
EMID1	2
FBXL2	2
LIN9	2
MGME1	2
SDC2	2
EDA	2
KIAA0319	2
MED12L	2
LHFPL6	2
LRRC9	2
AC093765.2	2
RUNX1T1	2
CCNB1	2
DLL3	2
GPR180	2
CHRNA5	2
ODF2	2
MB21D2	2
AC108519.1	2
PLBD1	2
C5orf34	2
MCM8	2
C2orf73	2
C3orf67-AS1	2
AP003555.2	2
CD55	2
CACNA2D1	2
AC023355.1	2
SHISAL2A	2
DCX	2
CDH12	2
ERBB4	2
PPFIA2	2
TMTC1	2
PPM1E	2
NTM	2
NDST4	2
AFF2	2
ROBO1	2
LINC01508	2
EPB41L4A	2
STMN2	2
GAP43	2
TUBB3	2
CCDC85A	2
EYA1	2
COL5A2	2
AC069228.1	2
DPP6	2
F11-AS1	2
KANK4	2
TUBA1A	2
TMSB10	2
SNCG	2
UCHL1	2
CNKSR2	2
SNCA	2
PRPH	2
INA	2
TDP1	2
ENPP1	2
CCDC15	2
RERG	2
HMGN5	2
DMC1	2
DSCC1	2
NEK2	2
SHISA9	2
AL606923.2	2
SYN3	2
SLC16A6	2
ZNF215	2
AL035425.3	2
TSGA10	2
AK8	2
AC079298.3	2
DBF4B	2
ADAM22	2
USP37	2
FKBP5	2
C11orf80	2
PELI2	2
AC092821.3	2
CLIC4	2
LINC01122	2
TMEM38B	2
CSMD1	2
FGF14	2
TSPAN19	2
ANKRD18A	2
DNAAF3	2
Z96074.1	2
PDE8B	2
PLPPR5	2
AC008667.1	2
LAMC3	2
LINC02246	2
FBN3	2
AC004158.1	2
PRDM5	2
RNF175	2
G2E3	2
TICRR	2
ARHGAP19	2
BORA	2
KCNJ3	2
AL354696.2	2
OTULINL	2
ADAMTS20	2
GXYLT1	2
C1orf21	2
USP13	2
HSPA4L	2
DRAXIN	2
TSPAN5	2
SPAG16	2
AL360178.1	2
CXXC4-AS1	2
SLC18A2	2
FLG-AS1	2
DNAJC9	2
PSMA1	2
AC091212.1	2
KCNK10	2
CA13	2
RIMS1	2
SWAP70	2
SYCP2L	2
PWWP3B	2
IQUB	2
CLIC6	2
DSC2	2
AC023282.1	2
SYDE2	2
DLGAP2	2
FAM102B	2
DISC1	2
AC025171.1	2
ARL15	2
AL592043.1	2
CCDC173	2
PRKAR2B	2
AC087564.1	2
NRG4	2
CAMKK1	2
ITGA6	2
PPP1R16B	2
CDH10	2
RYBP	2
NR3C1	2
SOGA3	2
GXYLT2	2
AC093898.1	2
CPEB1-AS1	2
SLC22A15	2
RGS6	2
AC016745.1	2
AL606468.1	2
AC005400.1	2
ATF7IP2	2
CREB3L2	2
CASC2	2
GUCY1A1	2
LINC01965	2
SERPINE2	2
SHISA6	2
RASSF8	2
C1orf112	2
SLC38A4	2
ZBTB7C	2
BCL2	2
PTTG1	2
C12orf75	2
AC024941.2	2
PTH2	2
ZNF676	2
APLF	2
HORMAD2-AS1	2
JHY	2
AC007091.1	2
TFPI	2
HELLPAR	2
KIF20A	2
AC005999.2	2
GPR39	2
NPY1R	2
AC015712.1	2
DDIAS	2
CDKN2B-AS1	2
TNFRSF10B	2
AL512662.2	2
ATG4C	2
IKBIP	2
STK26	2
ICA1L	2
MRAP2	2
U91319.1	2
CAP2	2
SUPT3H	2
LINC02268	2
AC025809.1	2
PTH1R	2
PMFBP1	2
POLA1	2
AL591519.1	2
RBBP8	2
TBC1D1	2
CDC6	2
E2F3	2
MAST2	2
RFWD3	2
[truncated: 1,220 more rows]

## Sheet: Module 1 GO
source	term_name	term_id	adjusted_p_value	negative_log10_of_adjusted_p_value	term_size	query_size	intersection_size	effective_domain_size	intersections
GO:MF	oxidoreduction-driven active transmembrane transporter activity	GO:0015453	2.32018e-06	5.63448	66	175	9	20195	MT-CO2,MT-CO3,MT-CO1,MT-CYB,MT-ND4,MT-ND3,MT-ND1,MT-ND2,MT-ND5
GO:MF	electron transfer activity	GO:0009055	3.51965e-05	4.4535	117	177	10	20195	MT-CO2,MT-CO3,MT-CO1,MT-CYB,MT-ND4,MT-ND3,MT-ND1,MT-ND2,MT-ND5,AOC2
GO:MF	transporter activity	GO:0005215	3.52264e-05	4.45313	1231	263	40	20195	CACNA1D,GJA1,TRPM1,CACNA2D3,CACNA2D4,SLC5A8,KCND2,RYR3,SLC22A3,SLC7A6,SLC34A2,SLC16A12,CACHD1,SLC39A12,MT-CO2,MT-CO3,MT-CO1,MT-ATP6,MT-CYB,MT-ND4,MT-ND3,MT-ND1,MT-ND2,MT-ND5,MT-ATP8,CLDN16,OSBPL6,PITPNC1,ATP1A2,ATP8A2,TMEM144,ABCA4,ABCC8,PEX5L,SLC7A8,SLC9C2,MT-ND4L,SLC13A3,CACNG4,CNNM1
GO:MF	active transmembrane transporter activity	GO:0022804	7.38054e-05	4.13191	428	259	21	20195	SLC5A8,SLC22A3,SLC7A6,SLC34A2,SLC16A12,MT-CO2,MT-CO3,MT-CO1,MT-CYB,MT-ND4,MT-ND3,MT-ND1,MT-ND2,MT-ND5,ATP1A2,ABCA4,ABCC8,SLC7A8,SLC9C2,MT-ND4L,SLC13A3
GO:MF	transmembrane transporter activity	GO:0022857	7.80772e-05	4.10748	1121	263	37	20195	CACNA1D,GJA1,TRPM1,CACNA2D3,CACNA2D4,SLC5A8,KCND2,RYR3,SLC22A3,SLC7A6,SLC34A2,SLC16A12,CACHD1,SLC39A12,MT-CO2,MT-CO3,MT-CO1,MT-ATP6,MT-CYB,MT-ND4,MT-ND3,MT-ND1,MT-ND2,MT-ND5,MT-ATP8,CLDN16,ATP1A2,TMEM144,ABCA4,ABCC8,PEX5L,SLC7A8,SLC9C2,MT-ND4L,SLC13A3,CACNG4,CNNM1
GO:MF	primary active transmembrane transporter activity	GO:0015399	9.10438e-05	4.04075	167	255	13	20195	MT-CO2,MT-CO3,MT-CO1,MT-CYB,MT-ND4,MT-ND3,MT-ND1,MT-ND2,MT-ND5,ATP1A2,ABCA4,ABCC8,MT-ND4L
GO:MF	monoatomic cation transmembrane transporter activity	GO:0008324	0.00181582	2.74093	603	262	23	20195	CACNA1D,TRPM1,CACNA2D3,CACNA2D4,SLC5A8,KCND2,RYR3,SLC34A2,CACHD1,SLC39A12,MT-CO2,MT-CO3,MT-CO1,MT-ATP6,MT-CYB,MT-ATP8,CLDN16,ATP1A2,ABCC8,PEX5L,SLC9C2,SLC13A3,CACNG4
GO:MF	inorganic cation transmembrane transporter activity	GO:0022890	0.00201709	2.69527	563	262	22	20195	CACNA1D,TRPM1,CACNA2D3,CACNA2D4,SLC5A8,KCND2,RYR3,SLC34A2,CACHD1,SLC39A12,MT-CO2,MT-CO3,MT-CO1,MT-ATP6,MT-CYB,MT-ATP8,CLDN16,ATP1A2,ABCC8,SLC9C2,SLC13A3,CACNG4
GO:MF	monoatomic ion transmembrane transporter activity	GO:0015075	0.00436869	2.35965	729	262	25	20195	CACNA1D,GJA1,TRPM1,CACNA2D3,CACNA2D4,SLC5A8,KCND2,RYR3,SLC22A3,SLC34A2,CACHD1,SLC39A12,MT-CO2,MT-CO3,MT-CO1,MT-ATP6,MT-CYB,MT-ATP8,CLDN16,ATP1A2,ABCC8,PEX5L,SLC9C2,SLC13A3,CACNG4
GO:MF	NADH dehydrogenase (ubiquinone) activity	GO:0008137	0.00506968	2.29502	41	255	6	20195	MT-ND4,MT-ND3,MT-ND1,MT-ND2,MT-ND5,MT-ND4L
GO:MF	NADH dehydrogenase (quinone) activity	GO:0050136	0.00585251	2.23266	42	255	6	20195	MT-ND4,MT-ND3,MT-ND1,MT-ND2,MT-ND5,MT-ND4L
GO:MF	NADH dehydrogenase activity	GO:0003954	0.00771099	2.11289	44	255	6	20195	MT-ND4,MT-ND3,MT-ND1,MT-ND2,MT-ND5,MT-ND4L
GO:MF	NAD(P)H dehydrogenase (quinone) activity	GO:0003955	0.00880392	2.05532	45	255	6	20195	MT-ND4,MT-ND3,MT-ND1,MT-ND2,MT-ND5,MT-ND4L
GO:MF	extracellular matrix structural constituent	GO:0005201	0.0102063	1.99113	174	99	7	20195	OPTC,PRELP,COL9A2,LTBP2,COL9A3,COL22A1,COL1A2
GO:MF	tryptamine:oxygen oxidoreductase (deaminating) activity	GO:0052593	0.032644	1.4862	2	177	2	20195	AOC3,AOC2
GO:MF	inorganic molecular entity transmembrane transporter activity	GO:0015318	0.0339093	1.46968	680	190	18	20195	CACNA1D,TRPM1,CACNA2D3,CACNA2D4,SLC5A8,KCND2,RYR3,SLC34A2,CACHD1,SLC39A12,MT-CO2,MT-CO3,MT-CO1,MT-ATP6,MT-CYB,MT-ATP8,CLDN16,ATP1A2
GO:MF	oxidoreductase activity, acting on NAD(P)H, quinone or similar compound as acceptor	GO:0016655	0.0345646	1.46137	57	255	6	20195	MT-ND4,MT-ND3,MT-ND1,MT-ND2,MT-ND5,MT-ND4L
GO:BP	system development	GO:0048731	1.45477e-06	5.83721	3987	261	91	21110	CLDN1,GJA1,ADAMTS9,OLFM3,NEBL,PRELP,TENM2,APCDD1,SNTG2,VWC2,DMD,DSCAM,ASS1,COL9A2,PLK2,FLRT3,FAT4,PAPPA2,ALDH1A3,BMPR1B,LRRC17,CALB1,SGCZ,DPYSL3,OTX1,SFRP2,SGK1,ACKR3,CCK,COL9A3,RNF207,BNC2,MYOCD,COL22A1,NECTIN3,BICDL1,IGFBP5,COL1A2,CLSTN2,ROR1,LRRK1,UNC5B,HAS2,CNTNAP2,IFT57,BRINP2,PRICKLE1,HEG1,DCT,FOLR1,FOXG1,LRRN1,TGFB2,NTNG2,RDH10,SLC39A12,MEIS2,PHACTR1,SLIT3,BHLHE22,MT-CO1,MT-ND4,DRC1,COL27A…
GO:BP	animal organ morphogenesis	GO:0009887	1.70173e-06	5.76911	1076	202	34	21110	OLFM3,APCDD1,DSCAM,TMEFF2,PRICKLE2,FAT4,PAPPA2,ALDH1A3,BMPR1B,CALB1,OTX1,SFRP2,RNF207,NECTIN3,IGFBP5,COL1A2,ROR1,HAS2,IFT57,PRICKLE1,HEG1,FOLR1,FOXG1,TGFB2,NTNG2,RDH10,MEIS2,SLIT3,COL27A1,CCL2,SIX4,ATP8A2,ASXL3,FGFR2
GO:BP	anatomical structure morphogenesis	GO:0009653	4.7257e-05	4.32553	2712	258	66	21110	GJA1,ADAMTS9,OLFM3,NEBL,APCDD1,DMD,DSCAM,TMEFF2,PRICKLE2,PGM5,PLK2,FLRT3,FAT4,PAPPA2,ALDH1A3,BMPR1B,CALB1,OTX1,SFRP2,SGK1,ACKR3,CCK,RNF207,MYOCD,COL22A1,NECTIN3,IGFBP5,COL1A2,ROR1,UNC5B,HAS2,CNTNAP2,IFT57,PRICKLE1,RHOU,HEG1,FOLR1,FOXG1,TGFB2,NTNG2,RDH10,SLC39A12,MEIS2,PHACTR1,SLIT3,COL27A1,CCL2,SIX4,TNNT1,ATP8A2,ASXL3,FGFR2,LMO4,ABCC8,NPHS1,FSTL4,CNTN2,CNTN4,TBC1D32,THBS1,PDPN,JAG1,VAX1,HECW1,TGF…
GO:BP	locomotion	GO:0040011	6.49195e-05	4.18762	1365	258	42	21110	CLDN1,GJA1,ADAMTS9,DSCAM,PLD1,TMEFF2,PLK2,FLRT3,BMPR1B,DPYSL3,SFRP2,SGK1,ACKR3,MYOCD,CLDN19,EPB41L4B,IGFBP5,SPOCK3,UNC5B,CXCL14,HAS2,FOXG1,GLIPR2,TGFB2,NTNG2,PHACTR1,SLIT3,ATP1A2,CCL2,IGF1,OPRK1,LMO4,ABCC8,CNTN2,CNTN4,THBS1,PTPRJ,PDPN,JAG1,VAX1,TGFBR2,SHTN1
GO:BP	oxidative phosphorylation	GO:0006119	9.96825e-05	4.00138	147	176	11	21110	MT-CO2,MT-CO3,MT-CO1,MT-ATP6,MT-CYB,MT-ND4,MT-ND3,MT-ND1,MT-ND2,MT-ND5,MT-ATP8
GO:BP	animal organ development	GO:0048513	0.000111268	3.95363	3128	245	69	21110	CLDN1,GJA1,ADAMTS9,OLFM3,NEBL,APCDD1,DMD,DSCAM,ASS1,TMEFF2,PRICKLE2,FLRT3,FAT4,PAPPA2,ALDH1A3,BMPR1B,LRRC17,HSD17B2,CALB1,SGCZ,OTX1,SFRP2,COL9A3,RNF207,BNC2,MYOCD,NECTIN3,IGFBP5,COL1A2,ROR1,LRRK1,CXCL14,HAS2,CNTNAP2,IFT57,PRICKLE1,HEG1,DCT,FOLR1,FOXG1,GLIPR2,TGFB2,NTNG2,RDH10,MEIS2,PHACTR1,SLIT3,MT-CO2,MT-CO1,MT-ND4,DRC1,COL27A1,ATP1A2,CCL2,SIX4,IGF1,ATP8A2,ASXL3,FGFR2,LMO4,NPHS1,CNTN2,DNAH5,CNTN…
GO:BP	extracellular matrix organization	GO:0030198	0.000128759	3.89022	324	247	18	21110	ADAMTS19,ADAMTS9,OPTC,COL9A2,SFRP2,COL9A3,COL22A1,HPSE2,COL1A2,HAS2,PRICKLE1,ADAMTS17,TGFB2,NTNG2,COL27A1,NPHS1,PDPN,CCDC80
GO:BP	extracellular structure organization	GO:0043062	0.000134901	3.86998	325	247	18	21110	ADAMTS19,ADAMTS9,OPTC,COL9A2,SFRP2,COL9A3,COL22A1,HPSE2,COL1A2,HAS2,PRICKLE1,ADAMTS17,TGFB2,NTNG2,COL27A1,NPHS1,PDPN,CCDC80
GO:BP	external encapsulating structure organization	GO:0045229	0.000148	3.82974	327	247	18	21110	ADAMTS19,ADAMTS9,OPTC,COL9A2,SFRP2,COL9A3,COL22A1,HPSE2,COL1A2,HAS2,PRICKLE1,ADAMTS17,TGFB2,NTNG2,COL27A1,NPHS1,PDPN,CCDC80
GO:BP	aerobic electron transport chain	GO:0019646	0.000164633	3.78348	92	175	9	21110	MT-CO2,MT-CO3,MT-CO1,MT-CYB,MT-ND4,MT-ND3,MT-ND1,MT-ND2,MT-ND5
GO:BP	mitochondrial ATP synthesis coupled electron transport	GO:0042775	0.000340618	3.46773	100	175	9	21110	MT-CO2,MT-CO3,MT-CO1,MT-CYB,MT-ND4,MT-ND3,MT-ND1,MT-ND2,MT-ND5
GO:BP	ATP synthesis coupled electron transport	GO:0042773	0.000340618	3.46773	100	175	9	21110	MT-CO2,MT-CO3,MT-CO1,MT-CYB,MT-ND4,MT-ND3,MT-ND1,MT-ND2,MT-ND5
GO:BP	multicellular organism development	GO:0007275	0.000382518	3.41735	4658	261	94	21110	CLDN1,GJA1,ADAMTS9,OLFM3,NEBL,PRELP,TENM2,APCDD1,SNTG2,VWC2,DMD,DSCAM,ASS1,COL9A2,PLK2,FLRT3,FAT4,PAPPA2,ALDH1A3,BMPR1B,LRRC17,HSD17B2,CALB1,SGCZ,DPYSL3,OTX1,SFRP2,SGK1,ACKR3,CCK,COL9A3,RNF207,BNC2,MYOCD,COL22A1,NECTIN3,BICDL1,IGFBP5,COL1A2,CLSTN2,ROR1,LRRK1,UNC5B,HAS2,CNTNAP2,IFT57,BRINP2,PRICKLE1,HEG1,DCT,FOLR1,SLC34A2,FOXG1,LRRN1,TGFB2,NTNG2,RDH10,SLC39A12,MEIS2,PHACTR1,SLIT3,BHLHE22,MT-CO1,MT…
GO:BP	cell adhesion	GO:0007155	0.00043173	3.36479	1530	247	42	21110	CLDN1,ADAMTS9,PCDH9,TENM2,VWC2,DMD,DSCAM,ASS1,TMEFF2,PGM5,FLRT3,FAT4,SFRP2,ACKR3,AOC3,CLDN19,NECTIN3,EPB41L4B,CYTIP,CLSTN2,HAS2,CNTNAP2,COL26A1,PRICKLE1,FOLR1,TGFB2,NTNG2,CLDN16,LRRN2,CCL2,IGF1,ADD2,IGFBP7,NPHS1,CNTN2,CNTN4,ASTN1,THBS1,PTPRJ,PDPN,JAG1,CCDC80
GO:BP	nervous system development	GO:0007399	0.00052876	3.27674	2547	261	61	21110	CLDN1,OLFM3,TENM2,APCDD1,SNTG2,VWC2,DMD,DSCAM,FLRT3,FAT4,ALDH1A3,BMPR1B,DPYSL3,OTX1,SFRP2,SGK1,ACKR3,CCK,BICDL1,CLSTN2,ROR1,UNC5B,CNTNAP2,IFT57,BRINP2,PRICKLE1,DCT,FOLR1,FOXG1,LRRN1,TGFB2,NTNG2,SLC39A12,MEIS2,PHACTR1,SLIT3,BHLHE22,MT-CO1,MT-ND4,ATP1A2,CCL2,SIX4,ATP8A2,ADD2,FGFR2,NAV1,LMO4,ABCC8,FSTL4,CNTN2,DNAH5,CNTN4,ASTN1,TBC1D32,JAG1,VAX1,HECW1,CSMD3,TGFBR2,SHTN1,MAST1
GO:BP	heart development	GO:0007507	0.000653213	3.18495	594	256	24	21110	GJA1,ADAMTS9,NEBL,FLRT3,FAT4,SGCZ,SFRP2,RNF207,MYOCD,HAS2,IFT57,PRICKLE1,HEG1,FOLR1,TGFB2,SLIT3,DRC1,IGF1,FGFR2,LMO4,DNAH5,TBC1D32,JAG1,TGFBR2
GO:BP	anatomical structure development	GO:0048856	0.00113255	2.94594	5896	261	110	21110	MECOM,CLDN1,GJA1,ADAMTS9,OLFM3,NEBL,PRELP,TENM2,XKR4,APCDD1,SNTG2,VWC2,DMD,DSCAM,ASS1,TMEFF2,PRICKLE2,PGM5,COL9A2,PLK2,FLRT3,FAT4,PAPPA2,ALDH1A3,BMPR1B,LRRC17,HSD17B2,CALB1,SGCZ,DPYSL3,OTX1,SFRP2,SGK1,ACKR3,RBM47,CCK,PAQR5,COL9A3,RNF207,BNC2,MYOCD,COL22A1,NECTIN3,BICDL1,IGFBP5,COL1A2,CLSTN2,ROR1,LRRK1,UNC5B,CXCL14,VWDE,HAS2,CNTNAP2,IFT57,BRINP2,PRICKLE1,RHOU,HEG1,DCT,FOLR1,SLC34A2,FOXG1,GLIPR2,LR…
GO:BP	transmembrane transport	GO:0055085	0.00154505	2.81106	1558	263	43	21110	CACNA1D,GJA1,DMD,CRHBP,TRPM1,CACNA2D3,RNF207,CACNA2D4,SLC5A8,KCND2,RYR3,SLC22A3,SLC7A6,FOLR1,SLC34A2,SLC16A12,CACHD1,SLC39A12,MT-CO2,MT-CO3,MT-CO1,MT-ATP6,MT-CYB,MT-ND4,MT-ND5,MT-ATP8,CLDN16,ATP1A2,CCL2,IGF1,TMEM144,ABCA4,OPRK1,CNKSR3,ABCC8,PEX5L,THBS1,SLC7A8,SLC9C2,HECW1,SLC13A3,CACNG4,CNNM1
GO:BP	circulatory system development	GO:0072359	0.00166944	2.77743	1123	243	33	21110	GJA1,ADAMTS9,NEBL,PLK2,FLRT3,FAT4,SGCZ,SFRP2,ACKR3,RNF207,MYOCD,COL22A1,COL1A2,UNC5B,HAS2,IFT57,PRICKLE1,HEG1,FOLR1,TGFB2,SLC39A12,SLIT3,DRC1,CCL2,IGF1,FGFR2,LMO4,ABCC8,DNAH5,TBC1D32,THBS1,PDPN,JAG1
GO:BP	aerobic respiration	GO:0009060	0.00183033	2.73747	196	176	11	21110	MT-CO2,MT-CO3,MT-CO1,MT-ATP6,MT-CYB,MT-ND4,MT-ND3,MT-ND1,MT-ND2,MT-ND5,MT-ATP8
GO:BP	generation of neurons	GO:0048699	0.0018335	2.73672	1488	258	41	21110	OLFM3,TENM2,VWC2,DMD,DSCAM,FLRT3,FAT4,BMPR1B,DPYSL3,SFRP2,SGK1,CCK,BICDL1,ROR1,UNC5B,CNTNAP2,BRINP2,PRICKLE1,DCT,FOLR1,FOXG1,TGFB2,NTNG2,SLC39A12,PHACTR1,SLIT3,BHLHE22,SIX4,ATP8A2,FGFR2,NAV1,LMO4,FSTL4,CNTN2,CNTN4,ASTN1,JAG1,VAX1,HECW1,CSMD3,SHTN1
GO:BP	respiratory electron transport chain	GO:0022904	0.00186891	2.72841	122	175	9	21110	MT-CO2,MT-CO3,MT-CO1,MT-CYB,MT-ND4,MT-ND3,MT-ND1,MT-ND2,MT-ND5
GO:BP	cell motility	GO:0048870	0.0020049	2.69791	1705	260	45	21110	CLDN1,GJA1,ADAMTS9,APCDD1,TMEFF2,PLK2,FLRT3,DPYSL3,SFRP2,SGK1,ACKR3,CCK,MYOCD,CLDN19,EPB41L4B,IGFBP5,SPOCK3,CXCL14,HAS2,PRICKLE1,FOLR1,FOXG1,GLIPR2,TGFB2,NTNG2,PHACTR1,DRC1,CCL2,SIX4,IGF1,ADD2,NAV1,LMO4,ABCC8,CNTN2,DNAH5,ASTN1,THBS1,PTPRJ,PDPN,JAG1,VAX1,TGFBR2,SHTN1,ARMC2
GO:BP	cell migration	GO:0016477	0.00245159	2.61055	1505	258	41	21110	CLDN1,GJA1,ADAMTS9,APCDD1,TMEFF2,PLK2,FLRT3,DPYSL3,SFRP2,SGK1,ACKR3,CCK,MYOCD,CLDN19,EPB41L4B,IGFBP5,CXCL14,HAS2,PRICKLE1,FOLR1,FOXG1,GLIPR2,TGFB2,NTNG2,PHACTR1,CCL2,SIX4,IGF1,ADD2,NAV1,LMO4,ABCC8,CNTN2,ASTN1,THBS1,PTPRJ,PDPN,JAG1,VAX1,TGFBR2,SHTN1
GO:BP	sensory organ development	GO:0007423	0.00296455	2.52804	601	256	23	21110	OLFM3,DSCAM,FAT4,ALDH1A3,BMPR1B,CALB1,OTX1,BNC2,NECTIN3,ROR1,CXCL14,PRICKLE1,FOXG1,TGFB2,RDH10,MEIS2,SIX4,ATP8A2,FGFR2,TBC1D32,JAG1,VAX1,TGFBR2
GO:BP	regulation of locomotion	GO:0040012	0.00303711	2.51754	1033	258	32	21110	CLDN1,GJA1,ADAMTS9,DSCAM,TMEFF2,PLK2,DPYSL3,SFRP2,SGK1,ACKR3,MYOCD,CLDN19,EPB41L4B,IGFBP5,SPOCK3,CXCL14,HAS2,GLIPR2,TGFB2,NTNG2,PHACTR1,CCL2,IGF1,OPRK1,LMO4,ABCC8,THBS1,PTPRJ,PDPN,JAG1,TGFBR2,SHTN1
GO:BP	proton motive force-driven mitochondrial ATP synthesis	GO:0042776	0.00356717	2.44768	68	176	7	21110	MT-ATP6,MT-ND4,MT-ND3,MT-ND1,MT-ND2,MT-ND5,MT-ATP8
GO:BP	neurogenesis	GO:0022008	0.00397422	2.40075	1705	258	44	21110	OLFM3,TENM2,APCDD1,VWC2,DMD,DSCAM,FLRT3,FAT4,BMPR1B,DPYSL3,SFRP2,SGK1,CCK,BICDL1,ROR1,UNC5B,CNTNAP2,BRINP2,PRICKLE1,DCT,FOLR1,FOXG1,TGFB2,NTNG2,SLC39A12,PHACTR1,SLIT3,BHLHE22,CCL2,SIX4,ATP8A2,FGFR2,NAV1,LMO4,ABCC8,FSTL4,CNTN2,CNTN4,ASTN1,JAG1,VAX1,HECW1,CSMD3,SHTN1
GO:BP	cellular component morphogenesis	GO:0032989	0.00408406	2.38891	796	258	27	21110	NEBL,DMD,DSCAM,PGM5,FLRT3,BMPR1B,SGK1,CCK,UNC5B,CNTNAP2,PRICKLE1,FOXG1,NTNG2,PHACTR1,SLIT3,SIX4,TNNT1,ATP8A2,FGFR2,LMO4,FSTL4,CNTN2,CNTN4,PDPN,VAX1,HECW1,SHTN1
GO:BP	morphogenesis of an epithelium	GO:0002009	0.00464132	2.33336	527	256	21	21110	GJA1,TMEFF2,PRICKLE2,FLRT3,FAT4,ALDH1A3,SFRP2,RNF207,IGFBP5,ROR1,IFT57,PRICKLE1,FOLR1,TGFB2,RDH10,SIX4,FGFR2,LMO4,PDPN,JAG1,TGFBR2
GO:BP	electron transport coupled proton transport	GO:0015990	0.00506029	2.29582	4	175	3	21110	MT-CO1,MT-ND4,MT-ND5
GO:BP	energy coupled proton transmembrane transport, against electrochemical gradient	GO:0015988	0.00506029	2.29582	4	175	3	21110	MT-CO1,MT-ND4,MT-ND5
GO:BP	cell-cell adhesion via plasma-membrane adhesion molecules	GO:0098742	0.0051841	2.28533	285	256	15	21110	CLDN1,PCDH9,TENM2,DSCAM,FLRT3,FAT4,CLDN19,NECTIN3,CLSTN2,TGFB2,NTNG2,CLDN16,CNTN2,CNTN4,TGFBR2
GO:BP	electron transport chain	GO:0022900	0.00552666	2.25754	176	177	10	21110	MT-CO2,MT-CO3,MT-CO1,MT-CYB,MT-ND4,MT-ND3,MT-ND1,MT-ND2,MT-ND5,AOC2
GO:BP	ear development	GO:0043583	0.00611196	2.21382	233	202	12	21110	FAT4,ALDH1A3,CALB1,OTX1,ROR1,CXCL14,FOXG1,TGFB2,RDH10,SIX4,ATP8A2,FGFR2
GO:BP	ATP biosynthetic process	GO:0006754	0.00680933	2.1669	106	176	8	21110	MT-CO2,MT-ATP6,MT-ND4,MT-ND3,MT-ND1,MT-ND2,MT-ND5,MT-ATP8
GO:BP	monoatomic cation transport	GO:0006812	0.00790365	2.10217	1064	262	32	21110	CACNA1D,DMD,TRPM1,NKAIN2,SGK1,CACNA2D3,RNF207,CACNA2D4,SLC5A8,KCND2,RYR3,SLC34A2,CACHD1,SLC39A12,MT-CO2,MT-CO3,MT-CO1,MT-ATP6,MT-CYB,MT-ND4,MT-ND5,MT-ATP8,CLDN16,ATP1A2,CCL2,OPRK1,CNKSR3,ABCC8,SLC9C2,HECW1,SLC13A3,CACNG4
GO:BP	developmental process	GO:0032502	0.00797075	2.0985	6489	261	115	21110	MECOM,CLDN1,GJA1,ADAMTS9,OLFM3,NEBL,PRELP,TENM2,XKR4,APCDD1,SNTG2,VWC2,DMD,DSCAM,ASS1,TMEFF2,PRICKLE2,PGM5,COL9A2,PLK2,FLRT3,FAT4,PAPPA2,ALDH1A3,ARL4A,BMPR1B,LRRC17,HSD17B2,CALB1,SGCZ,DPYSL3,OTX1,SFRP2,SGK1,ACKR3,RBM47,CCK,PAQR5,COL9A3,RNF207,BNC2,MYOCD,COL22A1,NECTIN3,EDARADD,BICDL1,IGFBP5,COL1A2,CLSTN2,RAB38,ROR1,LRRK1,UNC5B,CXCL14,VWDE,HAS2,CNTNAP2,IFT57,BRINP2,PRICKLE1,RHOU,HEG1,DCT,FOLR1,SLC…
GO:BP	regulation of cell migration	GO:0030334	0.00819275	2.08657	927	258	29	21110	CLDN1,GJA1,ADAMTS9,TMEFF2,PLK2,DPYSL3,SFRP2,SGK1,ACKR3,MYOCD,CLDN19,EPB41L4B,IGFBP5,CXCL14,HAS2,GLIPR2,TGFB2,NTNG2,PHACTR1,CCL2,IGF1,LMO4,ABCC8,THBS1,PTPRJ,PDPN,JAG1,TGFBR2,SHTN1
GO:BP	proton motive force-driven ATP synthesis	GO:0015986	0.00906419	2.04267	78	176	7	21110	MT-ATP6,MT-ND4,MT-ND3,MT-ND1,MT-ND2,MT-ND5,MT-ATP8
GO:BP	neuron development	GO:0048666	0.00950858	2.02188	1144	258	33	21110	OLFM3,TENM2,DMD,DSCAM,FLRT3,FAT4,BMPR1B,DPYSL3,SFRP2,SGK1,CCK,BICDL1,ROR1,UNC5B,CNTNAP2,PRICKLE1,FOLR1,FOXG1,TGFB2,NTNG2,SLC39A12,PHACTR1,SLIT3,ATP8A2,FGFR2,LMO4,FSTL4,CNTN2,CNTN4,VAX1,HECW1,CSMD3,SHTN1
GO:BP	morphogenesis of embryonic epithelium	GO:0016331	0.00995181	2.0021	157	212	10	21110	ALDH1A3,SFRP2,IFT57,PRICKLE1,FOLR1,TGFB2,RDH10,SIX4,FGFR2,LMO4
GO:BP	regulation of cell motility	GO:2000145	0.00995274	2.00206	988	258	30	21110	CLDN1,GJA1,ADAMTS9,TMEFF2,PLK2,DPYSL3,SFRP2,SGK1,ACKR3,MYOCD,CLDN19,EPB41L4B,IGFBP5,SPOCK3,CXCL14,HAS2,GLIPR2,TGFB2,NTNG2,PHACTR1,CCL2,IGF1,LMO4,ABCC8,THBS1,PTPRJ,PDPN,JAG1,TGFBR2,SHTN1
GO:BP	tissue development	GO:0009888	0.010229	1.99017	2008	158	34	21110	CLDN1,GJA1,ADAMTS9,NEBL,APCDD1,DMD,TMEFF2,PRICKLE2,PGM5,FLRT3,FAT4,ALDH1A3,BMPR1B,LRRC17,CALB1,SGCZ,SFRP2,RNF207,BNC2,MYOCD,COL22A1,IGFBP5,COL1A2,ROR1,HAS2,IFT57,PRICKLE1,HEG1,DCT,FOLR1,GLIPR2,TGFB2,NTNG2,RDH10
GO:BP	neuron projection development	GO:0031175	0.0103581	1.98472	990	258	30	21110	DMD,DSCAM,FLRT3,FAT4,BMPR1B,DPYSL3,SFRP2,SGK1,CCK,BICDL1,ROR1,UNC5B,CNTNAP2,PRICKLE1,FOLR1,FOXG1,NTNG2,SLC39A12,PHACTR1,SLIT3,ATP8A2,FGFR2,LMO4,FSTL4,CNTN2,CNTN4,VAX1,HECW1,CSMD3,SHTN1
GO:BP	inorganic cation transmembrane transport	GO:0098662	0.0104309	1.98168	828	216	24	21110	CACNA1D,DMD,TRPM1,CACNA2D3,RNF207,CACNA2D4,KCND2,RYR3,SLC34A2,CACHD1,SLC39A12,MT-CO2,MT-CO3,MT-CO1,MT-ATP6,MT-CYB,MT-ND4,MT-ND5,MT-ATP8,CLDN16,ATP1A2,OPRK1,CNKSR3,ABCC8
GO:BP	inner ear development	GO:0048839	0.0108565	1.96431	205	202	11	21110	FAT4,ALDH1A3,CALB1,OTX1,ROR1,CXCL14,FOXG1,TGFB2,SIX4,ATP8A2,FGFR2
GO:BP	monoatomic ion transmembrane transport	GO:0034220	0.0112141	1.95024	1030	262	31	21110	CACNA1D,GJA1,DMD,TRPM1,CACNA2D3,RNF207,CACNA2D4,KCND2,RYR3,SLC22A3,SLC34A2,CACHD1,SLC39A12,MT-CO2,MT-CO3,MT-CO1,MT-ATP6,MT-CYB,MT-ND4,MT-ND5,MT-ATP8,CLDN16,ATP1A2,CCL2,OPRK1,CNKSR3,ABCC8,SLC9C2,HECW1,SLC13A3,CACNG4
GO:BP	ATP metabolic process	GO:0046034	0.0122761	1.91094	141	190	9	21110	MT-CO2,MT-ATP6,MT-ND4,MT-ND3,MT-ND1,MT-ND2,MT-ND5,MT-ATP8,ATP1A2
GO:BP	skeletal system development	GO:0001501	0.0140588	1.85205	550	202	18	21110	GJA1,PRELP,COL9A2,FAT4,PAPPA2,BMPR1B,LRRC17,SFRP2,BNC2,COL1A2,LRRK1,HAS2,TGFB2,RDH10,COL27A1,SIX4,IGF1,FGFR2
GO:BP	purine ribonucleoside triphosphate biosynthetic process	GO:0009206	0.0142462	1.8463	117	176	8	21110	MT-CO2,MT-ATP6,MT-ND4,MT-ND3,MT-ND1,MT-ND2,MT-ND5,MT-ATP8
GO:BP	response to abiotic stimulus	GO:0009628	0.0143289	1.84379	1146	216	29	21110	CLDN1,DMD,TRPM1,PAPPA2,SFRP2,CACNA2D4,MYOCD,KCND2,CCND2,CNTNAP2,PRICKLE1,DCT,TGFB2,SLC39A12,MEIS2,MT-CO2,MT-CO1,MT-ATP6,MT-ND4,MT-ND3,MT-ND5,PCSK1N,ATP1A2,IGF1,ATP8A2,IGFBP7,ABCA4,OPRK1,ABCC8
GO:BP	purine nucleoside triphosphate biosynthetic process	GO:0009145	0.0151747	1.81888	118	176	8	21110	MT-CO2,MT-ATP6,MT-ND4,MT-ND3,MT-ND1,MT-ND2,MT-ND5,MT-ATP8
GO:BP	cellular respiration	GO:0045333	0.0152832	1.81579	244	176	11	21110	MT-CO2,MT-CO3,MT-CO1,MT-ATP6,MT-CYB,MT-ND4,MT-ND3,MT-ND1,MT-ND2,MT-ND5,MT-ATP8
GO:BP	bone development	GO:0060348	0.0158608	1.79968	237	256	13	21110	GJA1,FAT4,PAPPA2,BMPR1B,LRRC17,BNC2,LRRK1,HAS2,COL27A1,IGF1,FGFR2,PAPSS2,TGFBR2
GO:BP	plasma membrane bounded cell projection morphogenesis	GO:0120039	0.0185119	1.73255	666	258	23	21110	DMD,DSCAM,FLRT3,BMPR1B,SGK1,CCK,UNC5B,CNTNAP2,PRICKLE1,FOXG1,NTNG2,PHACTR1,SLIT3,ATP8A2,FGFR2,LMO4,FSTL4,CNTN2,CNTN4,PDPN,VAX1,HECW1,SHTN1
GO:BP	monoatomic cation transmembrane transport	GO:0098655	0.0193201	1.71399	859	216	24	21110	CACNA1D,DMD,TRPM1,CACNA2D3,RNF207,CACNA2D4,KCND2,RYR3,SLC34A2,CACHD1,SLC39A12,MT-CO2,MT-CO3,MT-CO1,MT-ATP6,MT-CYB,MT-ND4,MT-ND5,MT-ATP8,CLDN16,ATP1A2,OPRK1,CNKSR3,ABCC8
GO:BP	establishment of blood-nerve barrier	GO:0008065	0.0198608	1.702	4	26	2	21110	CLDN1,DMD
GO:BP	axis elongation	GO:0003401	0.0203538	1.69135	30	202	5	21110	SFRP2,PRICKLE1,RDH10,SIX4,FGFR2
GO:BP	ribonucleoside triphosphate biosynthetic process	GO:0009201	0.0206228	1.68565	123	176	8	21110	MT-CO2,MT-ATP6,MT-ND4,MT-ND3,MT-ND1,MT-ND2,MT-ND5,MT-ATP8
GO:BP	cell projection morphogenesis	GO:0048858	0.0208837	1.68019	671	258	23	21110	DMD,DSCAM,FLRT3,BMPR1B,SGK1,CCK,UNC5B,CNTNAP2,PRICKLE1,FOXG1,NTNG2,PHACTR1,SLIT3,ATP8A2,FGFR2,LMO4,FSTL4,CNTN2,CNTN4,PDPN,VAX1,HECW1,SHTN1
GO:BP	monoatomic ion transport	GO:0006811	0.0212293	1.67306	1274	263	35	21110	CACNA1D,GJA1,DMD,TRPM1,NKAIN2,SGK1,CACNA2D3,RNF207,CACNA2D4,SLC5A8,KCND2,RYR3,SLC22A3,SLC34A2,CACHD1,SLC39A12,MT-CO2,MT-CO3,MT-CO1,MT-ATP6,MT-CYB,MT-ND4,MT-ND5,MT-ATP8,CLDN16,ATP1A2,CCL2,OPRK1,CNKSR3,ABCC8,SLC9C2,HECW1,SLC13A3,CACNG4,CNNM1
GO:BP	neuron differentiation	GO:0030182	0.0222496	1.65268	1415	258	37	21110	OLFM3,TENM2,VWC2,DMD,DSCAM,FLRT3,FAT4,BMPR1B,DPYSL3,SFRP2,SGK1,CCK,BICDL1,ROR1,UNC5B,CNTNAP2,BRINP2,PRICKLE1,FOLR1,FOXG1,TGFB2,NTNG2,SLC39A12,PHACTR1,SLIT3,BHLHE22,ATP8A2,FGFR2,LMO4,FSTL4,CNTN2,CNTN4,JAG1,VAX1,HECW1,CSMD3,SHTN1
GO:BP	maintenance of blood-brain barrier	GO:0035633	0.0240336	1.61918	35	26	3	21110	CLDN1,GJA1,DMD
GO:BP	tissue morphogenesis	GO:0048729	0.0252909	1.59704	636	256	22	21110	GJA1,TMEFF2,PRICKLE2,FLRT3,FAT4,ALDH1A3,SFRP2,RNF207,IGFBP5,ROR1,IFT57,PRICKLE1,HEG1,FOLR1,TGFB2,RDH10,SIX4,FGFR2,LMO4,PDPN,JAG1,TGFBR2
GO:BP	muscle tissue development	GO:0060537	0.0268681	1.57076	410	256	17	21110	GJA1,ADAMTS9,NEBL,DMD,PGM5,SGCZ,MYOCD,IGFBP5,PRICKLE1,HEG1,TGFB2,SIX4,IGF1,FGFR2,NPHS1,VAX1,TGFBR2
GO:BP	negative regulation of cell motility	GO:2000146	0.027481	1.56097	303	243	14	21110	GJA1,ADAMTS9,TMEFF2,DPYSL3,SFRP2,MYOCD,CLDN19,IGFBP5,SPOCK3,CCL2,ABCC8,THBS1,PTPRJ,JAG1
GO:BP	plasma membrane bounded cell projection organization	GO:0120036	0.0290204	1.5373	1535	260	39	21110	TENM2,DMD,DSCAM,PLD1,FLRT3,FAT4,BMPR1B,DPYSL3,SFRP2,SGK1,CCK,BICDL1,ROR1,FHDC1,UNC5B,CNTNAP2,IFT57,PRICKLE1,FOLR1,FOXG1,NTNG2,SLC39A12,PHACTR1,SLIT3,DRC1,ATP8A2,FGFR2,LMO4,FSTL4,CNTN2,DNAH5,CNTN4,TBC1D32,PDPN,VAX1,HECW1,CSMD3,SHTN1,ARMC2
GO:BP	proteoglycan biosynthetic process	GO:0030166	0.0293245	1.53277	66	250	7	21110	CHSY3,DSEL,BMPR1B,HS6ST2,NDST3,IGF1,HS3ST4
GO:BP	cell development	GO:0048468	0.030751	1.51214	2763	260	59	21110	MECOM,CLDN1,OLFM3,NEBL,TENM2,DMD,DSCAM,PGM5,FLRT3,FAT4,BMPR1B,LRRC17,SGCZ,DPYSL3,SFRP2,SGK1,RBM47,CCK,PAQR5,COL22A1,NECTIN3,BICDL1,ROR1,LRRK1,UNC5B,CNTNAP2,PRICKLE1,HEG1,DCT,FOLR1,FOXG1,TGFB2,NTNG2,RDH10,SLC39A12,MEIS2,PHACTR1,SLIT3,COL27A1,SIX4,TNNT1,IGF1,ATP8A2,ADD2,FGFR2,LMO4,ABCC8,NPHS1,FSTL4,CNTN2,CNTN4,PTPRJ,JAG1,VAX1,HECW1,CSMD3,TGFBR2,SHTN1,ARMC2
GO:BP	cell part morphogenesis	GO:0032990	0.0333874	1.47642	691	258	23	21110	DMD,DSCAM,FLRT3,BMPR1B,SGK1,CCK,UNC5B,CNTNAP2,PRICKLE1,FOXG1,NTNG2,PHACTR1,SLIT3,ATP8A2,FGFR2,LMO4,FSTL4,CNTN2,CNTN4,PDPN,VAX1,HECW1,SHTN1
GO:BP	proton transmembrane transport	GO:1902600	0.035887	1.44506	161	190	9	21110	MT-CO2,MT-CO3,MT-CO1,MT-ATP6,MT-CYB,MT-ND4,MT-ND5,MT-ATP8,ATP1A2
GO:BP	nucleoside triphosphate biosynthetic process	GO:0009142	0.0386087	1.41331	134	176	8	21110	MT-CO2,MT-ATP6,MT-ND4,MT-ND3,MT-ND1,MT-ND2,MT-ND5,MT-ATP8
GO:BP	neuron projection morphogenesis	GO:0048812	0.0399537	1.39844	650	258	22	21110	DMD,DSCAM,FLRT3,BMPR1B,SGK1,CCK,UNC5B,CNTNAP2,PRICKLE1,FOXG1,NTNG2,PHACTR1,SLIT3,ATP8A2,FGFR2,LMO4,FSTL4,CNTN2,CNTN4,VAX1,HECW1,SHTN1
GO:BP	heart morphogenesis	GO:0003007	0.0426071	1.37052	260	256	13	21110	FAT4,SFRP2,RNF207,HAS2,IFT57,PRICKLE1,HEG1,FOLR1,TGFB2,SLIT3,FGFR2,JAG1,TGFBR2
GO:BP	purine ribonucleoside triphosphate metabolic process	GO:0009205	0.0457925	1.33921	166	190	9	21110	MT-CO2,MT-ATP6,MT-ND4,MT-ND3,MT-ND1,MT-ND2,MT-ND5,MT-ATP8,ATP1A2
GO:BP	striated muscle tissue development	GO:0014706	0.0460747	1.33654	239	202	11	21110	GJA1,ADAMTS9,NEBL,PGM5,SGCZ,MYOCD,PRICKLE1,HEG1,TGFB2,IGF1,FGFR2
GO:BP	tube development	GO:0035295	0.0475903	1.32248	1082	243	29	21110	ADAMTS9,ASS1,PLK2,FAT4,CALB1,SFRP2,ACKR3,RNF207,MYOCD,COL22A1,IGFBP5,UNC5B,HAS2,IFT57,PRICKLE1,HEG1,FOLR1,TGFB2,RDH10,SLC39A12,CCL2,SIX4,FGFR2,LMO4,ABCC8,TBC1D32,THBS1,PDPN,JAG1
GO:BP	proteoglycan metabolic process	GO:0006029	0.049397	1.3063	98	250	8	21110	CHSY3,DSEL,BMPR1B,HS6ST2,SPOCK3,NDST3,IGF1,HS3ST4
GO:CC	extracellular matrix	GO:0031012	6.22846e-08	7.20562	567	208	25	22122	ADAMTS9,LRRC3B,OPTC,PRELP,VWC2,TMEFF2,COL9A2,FLRT3,LRRC17,SFRP2,LTBP2,COL9A3,COL22A1,HPSE2,COL1A2,SPOCK3,COL26A1,ADAMTS17,LRRN1,TGFB2,NTNG2,LRRN2,COL27A1,FGFR2,IGFBP7
GO:CC	external encapsulating structure	GO:0030312	6.46251e-08	7.1896	568	208	25	22122	ADAMTS9,LRRC3B,OPTC,PRELP,VWC2,TMEFF2,COL9A2,FLRT3,LRRC17,SFRP2,LTBP2,COL9A3,COL22A1,HPSE2,COL1A2,SPOCK3,COL26A1,ADAMTS17,LRRN1,TGFB2,NTNG2,LRRN2,COL27A1,FGFR2,IGFBP7
GO:CC	cell periphery	GO:0071944	1.44186e-07	6.84108	6303	265	123	22122	CLDN1,CLEC19A,CACNA1D,GJA1,ADAMTS9,LRRC3B,OLFM3,OPTC,PRELP,PCDH9,TENM2,XKR4,LHFPL3,APCDD1,SNTG2,VWC2,DMD,DSCAM,PLD1,CPNE8,TMEFF2,TRPM1,PGM5,NKAIN2,GPA33,LYPD6B,COL9A2,FLRT3,FAT4,PAPPA2,ARL4A,BMPR1B,LRRC17,CALB1,SGCZ,SFRP2,SGK1,ACKR3,LTBP2,PAQR5,COL9A3,CACNA2D3,GRB14,AOC3,CACNA2D4,AP1S3,COL22A1,CLDN19,NECTIN3,EPB41L4B,HPSE2,CYTIP,SLC5A8,COL1A2,ARL4C,CLSTN2,KCND2,RAB38,ROR1,SPOCK3,LRRC7,UNC5B,HAS2,…
GO:CC	respiratory chain complex	GO:0098803	2.09734e-05	4.67833	93	175	9	22122	MT-CO2,MT-CO3,MT-CO1,MT-CYB,MT-ND4,MT-ND3,MT-ND1,MT-ND2,MT-ND5
GO:CC	transporter complex	GO:1990351	2.45663e-05	4.60966	436	216	19	22122	CACNA1D,OLFM3,VWC2,CACNA2D3,CACNA2D4,KCND2,CNTNAP2,RYR3,CACHD1,MT-CO1,MT-CYB,MT-ND4,MT-ND3,MT-ND1,MT-ND2,MT-ND5,ATP1A2,ATP8A2,ABCC8
GO:CC	mitochondrial respirasome	GO:0005746	2.77042e-05	4.55745	96	175	9	22122	MT-CO2,MT-CO3,MT-CO1,MT-CYB,MT-ND4,MT-ND3,MT-ND1,MT-ND2,MT-ND5
GO:CC	inner mitochondrial membrane protein complex	GO:0098800	3.1062e-05	4.50777	163	176	11	22122	MT-CO2,MT-CO3,MT-CO1,MT-ATP6,MT-CYB,MT-ND4,MT-ND3,MT-ND1,MT-ND2,MT-ND5,MT-ATP8
GO:CC	transmembrane transporter complex	GO:1902495	3.85056e-05	4.41448	409	190	17	22122	CACNA1D,OLFM3,VWC2,CACNA2D3,CACNA2D4,KCND2,CNTNAP2,RYR3,CACHD1,MT-CO1,MT-CYB,MT-ND4,MT-ND3,MT-ND1,MT-ND2,MT-ND5,ATP1A2
GO:CC	dystrophin-associated glycoprotein complex	GO:0016010	4.9462e-05	4.30573	18	58	4	22122	SNTG2,DMD,PGM5,SGCZ
GO:CC	respirasome	GO:0070469	5.11483e-05	4.29117	103	175	9	22122	MT-CO2,MT-CO3,MT-CO1,MT-CYB,MT-ND4,MT-ND3,MT-ND1,MT-ND2,MT-ND5
GO:CC	glycoprotein complex	GO:0090665	0.000141741	3.8485	23	58	4	22122	SNTG2,DMD,PGM5,SGCZ
GO:CC	extracellular region	GO:0005576	0.000146411	3.83443	4236	70	32	22122	ADAMTS19,CLEC19A,ADAMTS9,WFDC1,LRRC3B,OLFM3,NEBL,OPTC,PRELP,VWC2,CRHBP,DSCAM,ASS1,CFI,CPNE8,TMEFF2,CPXM2,GPA33,LYPD6B,COL9A2,FLRT3,FAT4,PAPPA2,ALDH1A3,LRRC17,CALB1,DPYSL3,SFRP2,RASSF9,LTBP2,CCK,COL9A3
GO:CC	plasma membrane region	GO:0098590	0.001657	2.78068	1292	262	35	22122	CLDN1,GJA1,TENM2,DMD,PLD1,FLRT3,PAPPA2,ACKR3,AP1S3,CLDN19,NECTIN3,SLC5A8,CLSTN2,KCND2,HAS2,CNTNAP2,SLC7A6,FOLR1,SLC34A2,SLC16A12,NTNG2,ATP1A2,ADD2,MREG,OPRK1,CNKSR3,DGKI,CNTN2,PTPRJ,SLC7A8,PDPN,JAG1,TGFBR2,SLC13A3,CACNG4
GO:CC	membrane protein complex	GO:0098796	0.00190037	2.72116	1361	199	30	22122	CACNA1D,GJA1,OLFM3,SNTG2,VWC2,DMD,PGM5,BMPR1B,SGCZ,CACNA2D3,CACNA2D4,AP1S3,KCND2,CNTNAP2,RYR3,CACHD1,MT-CO2,MT-CO3,MT-CO1,MT-ATP6,MT-CYB,MT-ND4,MT-ND3,MT-ND1,MT-ND2,MT-ND5,MT-ATP8,ATP1A2,IGF1,CPLX4
GO:CC	extracellular space	GO:0005615	0.00249698	2.60258	3384	70	26	22122	ADAMTS9,WFDC1,LRRC3B,OLFM3,NEBL,PRELP,VWC2,CRHBP,ASS1,CFI,CPNE8,CPXM2,GPA33,COL9A2,FLRT3,FAT4,PAPPA2,ALDH1A3,LRRC17,CALB1,DPYSL3,SFRP2,RASSF9,LTBP2,CCK,COL9A3
GO:CC	collagen-containing extracellular matrix	GO:0062023	0.00294153	2.53143	430	247	17	22122	ADAMTS9,PRELP,VWC2,TMEFF2,COL9A2,SFRP2,LTBP2,COL9A3,COL1A2,COL26A1,TGFB2,NTNG2,COL27A1,FGFR2,IGFBP7,THBS1,CCDC80
GO:CC	syntrophin complex	GO:0016013	0.00310862	2.50743	4	26	2	22122	SNTG2,DMD
GO:CC	plasma membrane	GO:0005886	0.00332956	2.47761	5819	265	102	22122	CLDN1,CLEC19A,CACNA1D,GJA1,OLFM3,PCDH9,TENM2,XKR4,LHFPL3,APCDD1,SNTG2,VWC2,DMD,DSCAM,PLD1,CPNE8,TMEFF2,TRPM1,PGM5,NKAIN2,GPA33,LYPD6B,FLRT3,FAT4,PAPPA2,ARL4A,BMPR1B,SGCZ,SGK1,ACKR3,PAQR5,CACNA2D3,GRB14,AOC3,CACNA2D4,AP1S3,CLDN19,NECTIN3,EPB41L4B,HPSE2,SLC5A8,ARL4C,CLSTN2,KCND2,RAB38,ROR1,LRRC7,UNC5B,HAS2,CNTNAP2,COL26A1,RYR3,SLC22A3,SLC7A6,RHOU,HEG1,DCT,FOLR1,SLC34A2,SLC16A12,NTNG2,CACHD1,SLC39A1…
GO:CC	distal axon	GO:0150034	0.00358213	2.44586	279	59	7	22122	PCDH9,TENM2,CRHBP,DSCAM,FLRT3,CALB1,DPYSL3
GO:CC	axon	GO:0030424	0.00384054	2.41561	648	261	22	22122	PCDH9,TENM2,DMD,CRHBP,DSCAM,TRPM1,FLRT3,CALB1,DPYSL3,CCK,ROR1,CNTNAP2,TGFB2,NTNG2,CPLX4,NAV1,OPRK1,DGKI,CNTN2,CNTN4,SHTN1,MAST1
GO:CC	cell body	GO:0044297	0.00834062	2.0788	580	262	20	22122	PDE11A,DMD,CRHBP,DSCAM,ASS1,CALB1,DPYSL3,KCND2,RAB38,CNTNAP2,BRINP2,SLC22A3,TGFB2,ATP1A2,OPRK1,CNTN2,ASTN1,SHTN1,MAST1,CACNG4
GO:CC	collagen type IX trimer	GO:0005594	0.0115427	1.93769	3	70	2	22122	COL9A2,COL9A3
GO:CC	sarcolemma	GO:0042383	0.012055	1.91883	138	58	5	22122	CACNA1D,SNTG2,DMD,PGM5,SGCZ
GO:CC	NADH dehydrogenase complex	GO:0030964	0.0126002	1.89962	53	255	6	22122	MT-ND4,MT-ND3,MT-ND1,MT-ND2,MT-ND5,MT-ND4L
GO:CC	respiratory chain complex I	GO:0045271	0.0126002	1.89962	53	255	6	22122	MT-ND4,MT-ND3,MT-ND1,MT-ND2,MT-ND5,MT-ND4L
GO:CC	mitochondrial respiratory chain complex I	GO:0005747	0.0126002	1.89962	53	255	6	22122	MT-ND4,MT-ND3,MT-ND1,MT-ND2,MT-ND5,MT-ND4L
GO:CC	mitochondrial protein-containing complex	GO:0098798	0.0153235	1.81464	309	176	11	22122	MT-CO2,MT-CO3,MT-CO1,MT-ATP6,MT-CYB,MT-ND4,MT-ND3,MT-ND1,MT-ND2,MT-ND5,MT-ATP8
GO:CC	plasma membrane protein complex	GO:0098797	0.0161818	1.79097	717	78	11	22122	CACNA1D,GJA1,OLFM3,SNTG2,VWC2,DMD,PGM5,BMPR1B,SGCZ,CACNA2D3,CACNA2D4
GO:CC	membrane	GO:0016020	0.0219039	1.65948	9878	263	149	22122	CLDN1,CLEC19A,CACNA1D,GJA1,CHSY3,DSEL,LRRC3B,OLFM3,PCDH9,TENM2,XKR4,LHFPL3,PTCHD4,APCDD1,SNTG2,VWC2,DMD,DSCAM,PLD1,ASS1,CFI,CPNE8,TMEFF2,PRICKLE2,TRPM1,PGM5,NKAIN2,GPA33,LYPD6B,FLRT3,FAT4,PAPPA2,ARL4A,BMPR1B,HS6ST2,HSD17B2,SGCZ,RASSF9,SGK1,ACKR3,TMEM132C,PAQR5,CACNA2D3,GRB14,AOC3,CACNA2D4,AP1S3,CLDN19,NECTIN3,EPB41L4B,HPSE2,SLC5A8,ARL4C,CLSTN2,KCND2,RAB38,ROR1,CCND2,LRRC7,UNC5B,HAS2,CNTNAP2,COL26…
GO:CC	Z disc	GO:0030018	0.0298375	1.52524	132	38	4	22122	CACNA1D,NEBL,DMD,PGM5
GO:CC	growth cone	GO:0030426	0.0343599	1.46395	169	59	5	22122	PCDH9,TENM2,DSCAM,FLRT3,DPYSL3
GO:CC	oxidoreductase complex	GO:1990204	0.0344984	1.4622	132	175	7	22122	MT-CO1,MT-CYB,MT-ND4,MT-ND3,MT-ND1,MT-ND2,MT-ND5
GO:CC	site of polarized growth	GO:0030427	0.0404966	1.39258	175	59	5	22122	PCDH9,TENM2,DSCAM,FLRT3,DPYSL3
GO:CC	somatodendritic compartment	GO:0036477	0.0425694	1.3709	867	262	24	22122	PDE11A,TENM2,DMD,CRHBP,DSCAM,ASS1,PLK2,SAMD4A,CALB1,CLSTN2,KCND2,CNTNAP2,IFT57,BRINP2,SLC22A3,TGFB2,ATP1A2,OPRK1,DGKI,CNTN2,ASTN1,SHTN1,MAST1,CACNG4
GO:CC	I band	GO:0031674	0.0440896	1.35566	146	38	4	22122	CACNA1D,NEBL,DMD,PGM5
GO:CC	collagen trimer	GO:0005581	0.0498935	1.30196	93	184	6	22122	COL9A2,COL9A3,COL22A1,COL1A2,COL26A1,COL27A1
KEGG	Oxidative phosphorylation	KEGG:00190	0.012562	1.90094	134	176	11	8161	MT-CO2,MT-CO3,MT-CO1,MT-ATP6,MT-CYB,MT-ND4,MT-ND3,MT-ND1,MT-ND2,MT-ND5,MT-ATP8
KEGG	Glycosaminoglycan biosynthesis - chondroitin sulfate / dermatan sulfate	KEGG:00532	0.0303249	1.5182	21	11	2	8161	CHSY3,DSEL
KEGG	Diabetic cardiomyopathy	KEGG:05415	0.0379627	1.42064	203	176	13	8161	COL1A2,TGFB2,MT-CO2,MT-CO3,MT-CO1,MT-ATP6,MT-CYB,MT-ND4,MT-ND3,MT-ND1,MT-ND2,MT-ND5,MT-ATP8
REAC	Respiratory electron transport, ATP synthesis by chemiosmotic coupling, and heat production by uncoupling proteins.	REAC:R-HSA-163200	0.00260464	2.58425	127	176	11	10790	MT-CO2,MT-CO3,MT-CO1,MT-ATP6,MT-CYB,MT-ND4,MT-ND3,MT-ND1,MT-ND2,MT-ND5,MT-ATP8
REAC	Respiratory electron transport	REAC:R-HSA-611105	0.016254	1.78904	103	175	9	10790	MT-CO2,MT-CO3,MT-CO1,MT-CYB,MT-ND4,MT-ND3,MT-ND1,MT-ND2,MT-ND5
REAC	Collagen chain trimerization	REAC:R-HSA-8948216	0.0353682	1.45139	44	184	6	10790	COL9A2,COL9A3,COL22A1,COL1A2,COL26A1,COL27A1
WP	Electron transport chain: OXPHOS system in mitochondria	WP:WP111	0.00216659	2.66422	103	176	11	8133	MT-CO2,MT-CO3,MT-CO1,MT-ATP6,MT-CYB,MT-ND4,MT-ND3,MT-ND1,MT-ND2,MT-ND5,MT-ATP8
TF	Factor: GCMb:FOXI1; motif: RTAAATANGGGNN	TF:M08331	0.00491311	2.30864	46	253	7	20011	UNC5B,MT-CO2,MT-CO3,MT-ATP6,MT-ND5,MT-ATP8,TMEM132B
TF	Factor: BCL6; motif: NKTTCTAGGW	TF:M01171	0.0484797	1.31444	1365	230	34	20011	CLEC19A,GJA1,ADAMTS9,CCSER1,TRPM1,GPA33,LYPD6B,ARL4A,MYOCD,CCND2,VWDE,CNTNAP2,IFT57,HEG1,GDAP1,CACHD1,SLC39A12,MT-CO2,MT-CO3,MT-ATP6,MT-ND3,MT-ND2,MT-ATP8,COL27A1,PCSK1N,TNNT1,IGF1,CPLX4,GLT8D2,OPRK1,SMPDL3B,GPR153,DNAH5,BTBD11
HPA	eye; hyaloid membrane[High]	HPA:0200273	6.58892e-05	4.18119	3	70	3	11006	OPTC,COL9A2,COL9A3
HPA	eye; hyaloid membrane[‚â•Medium]	HPA:0200272	0.000262353	3.58111	4	70	3	11006	OPTC,COL9A2,COL9A3
HPA	eye; hyaloid membrane[‚â•Low]	HPA:0200271	0.000262353	3.58111	4	70	3	11006	OPTC,COL9A2,COL9A3
HP	Centrocecal scotoma	HP:0000576	2.64537e-06	5.57751	13	255	9	4851	MT-CO3,MT-CO1,MT-ATP6,MT-CYB,MT-ND4,MT-ND1,MT-ND2,MT-ND5,MT-ND4L
HP	Mitochondrial inheritance	HP:0001427	2.66723e-06	5.57394	17	175	9	4851	MT-CO2,MT-CO3,MT-CO1,MT-ATP6,MT-CYB,MT-ND4,MT-ND1,MT-ND2,MT-ND5
HP	Leber optic atrophy	HP:0001112	3.58748e-06	5.44521	10	255	8	4851	MT-CO3,MT-ATP6,MT-CYB,MT-ND4,MT-ND1,MT-ND2,MT-ND5,MT-ND4L
HP	Multiple glomerular cysts	HP:0100611	1.28958e-05	4.88955	10	175	7	4851	MYOCD,MT-ATP6,MT-ND4,MT-ND3,MT-ND1,MT-ND2,MT-ND5
HP	Central retinal vessel vascular tortuosity	HP:0007768	3.59689e-05	4.44407	12	255	8	4851	MT-CO3,MT-ATP6,MT-CYB,MT-ND4,MT-ND1,MT-ND2,MT-ND5,MT-ND4L
HP	Retinal arterial tortuosity	HP:0000631	3.59689e-05	4.44407	12	255	8	4851	MT-CO3,MT-ATP6,MT-CYB,MT-ND4,MT-ND1,MT-ND2,MT-ND5,MT-ND4L
HP	Arterial tortuosity	HP:0005116	0.000146034	3.83555	23	256	10	4851	TGFB2,MT-CO3,MT-ATP6,MT-CYB,MT-ND4,MT-ND1,MT-ND2,MT-ND5,MT-ND4L,TGFBR2
HP	Mitochondrial respiratory chain defects	HP:0200125	0.000354596	3.45027	20	175	8	4851	MT-CO3,MT-CO1,MT-ATP6,MT-CYB,MT-ND4,MT-ND1,MT-ND2,MT-ND5
HP	Ventricular preexcitation	HP:0004309	0.000537184	3.26988	28	175	9	4851	MT-CO2,MT-CO3,MT-CO1,MT-ATP6,MT-CYB,MT-ND4,MT-ND1,MT-ND2,MT-ND5
HP	Vascular tortuosity	HP:0004948	0.000588606	3.23018	26	256	10	4851	TGFB2,MT-CO3,MT-ATP6,MT-CYB,MT-ND4,MT-ND1,MT-ND2,MT-ND5,MT-ND4L,TGFBR2
HP	Ragged-red muscle fibers	HP:0003200	0.000606511	3.21716	45	176	11	4851	MT-CO2,MT-CO3,MT-CO1,MT-ATP6,MT-CYB,MT-ND4,MT-ND3,MT-ND1,MT-ND2,MT-ND5,MT-ATP8
HP	Mixed demyelinating and axonal polyneuropathy	HP:0007327	0.000628546	3.20166	10	175	6	4851	MT-CO2,MT-CO3,MT-CO1,MT-ND4,MT-ND1,MT-ND5
HP	Abnormal circulating citrulline concentration	HP:0011965	0.0010222	2.99046	16	175	7	4851	ASS1,MT-ATP6,MT-ND4,MT-ND3,MT-ND1,MT-ND2,MT-ND5
HP	Low plasma citrulline	HP:0003572	0.00134154	2.8724	11	175	6	4851	MT-ATP6,MT-ND4,MT-ND3,MT-ND1,MT-ND2,MT-ND5
HP	Widened cerebral subarachnoid space	HP:0012766	0.00134154	2.8724	11	175	6	4851	MT-CO2,MT-CO3,MT-CO1,MT-ND4,MT-ND1,MT-ND5
HP	Aplasia/Hypoplasia of the cerebral white matter	HP:0012429	0.00168516	2.77336	17	175	7	4851	PSAT1,MT-CO2,MT-CO3,MT-CO1,MT-ND4,MT-ND1,MT-ND5
HP	Retinal telangiectasia	HP:0007763	0.00365069	2.43762	26	175	8	4851	MT-CO3,MT-CO1,MT-ATP6,MT-CYB,MT-ND4,MT-ND1,MT-ND2,MT-ND5
HP	Distal peripheral sensory neuropathy	HP:0007067	0.00469009	2.32882	13	175	6	4851	MT-CO2,MT-CO3,MT-CO1,MT-ND4,MT-ND1,MT-ND5
HP	Episodic vomiting	HP:0002572	0.006356	2.19682	46	175	10	4851	MT-CO2,MT-CO3,MT-CO1,MT-ATP6,MT-CYB,MT-ND4,MT-ND3,MT-ND1,MT-ND2,MT-ND5
HP	Concentric hypertrophic cardiomyopathy	HP:0005157	0.00796309	2.09892	14	175	6	4851	MT-CO2,MT-CO3,MT-CO1,MT-ND4,MT-ND1,MT-ND5
HP	Stroke-like episode	HP:0002401	0.00891134	2.05006	21	175	7	4851	MT-CO2,MT-CO3,MT-CO1,MT-CYB,MT-ND4,MT-ND1,MT-ND5
HP	Abnormality of Krebs cycle metabolism	HP:0000816	0.0128765	1.8902	15	175	6	4851	MT-ATP6,MT-ND4,MT-ND3,MT-ND1,MT-ND2,MT-ND5
HP	Wolff-Parkinson-White syndrome	HP:0001716	0.0176704	1.75275	23	175	7	4851	MT-CO2,MT-CO3,MT-CO1,MT-CYB,MT-ND4,MT-ND1,MT-ND5
HP	Stuttering	HP:0025268	0.0199891	1.69921	16	175	6	4851	MT-CO2,MT-CO3,MT-CO1,MT-ND4,MT-ND1,MT-ND5
HP	Abnormal circulating non-proteinogenic amino acid concentration	HP:0033109	0.0241936	1.6163	24	175	7	4851	ASS1,MT-ATP6,MT-ND4,MT-ND3,MT-ND1,MT-ND2,MT-ND5
HP	Episodic respiratory distress	HP:0004885	0.0299731	1.52327	17	175	6	4851	MT-ATP6,MT-ND4,MT-ND3,MT-ND1,MT-ND2,MT-ND5
HP	Slow decrease in visual acuity	HP:0007924	0.0331161	1.47996	34	175	8	4851	MT-CO3,MT-CO1,MT-ATP6,MT-CYB,MT-ND4,MT-ND1,MT-ND2,MT-ND5
HP	Mitochondrial myopathy	HP:0003737	0.0343975	1.46347	55	175	10	4851	MT-CO2,MT-CO3,MT-CO1,MT-ATP6,MT-CYB,MT-ND4,MT-ND3,MT-ND1,MT-ND2,MT-ND5
HP	Blurred vision	HP:0000622	0.0434608	1.3619	42	190	9	4851	MT-CO3,MT-CO1,MT-ATP6,MT-CYB,MT-ND4,MT-ND1,MT-ND2,MT-ND5,ATP1A2
HP	Segmental peripheral demyelination/remyelination	HP:0003481	0.0436226	1.36029	18	175	6	4851	MT-ATP6,MT-ND4,MT-ND3,MT-ND1,MT-ND2,MT-ND5
HP	Recurrent pancreatitis	HP:0100027	0.0436226	1.36029	18	175	6	4851	MT-CO2,MT-CO3,MT-CO1,MT-ND4,MT-ND1,MT-ND5

## Sheet: Module 2 GO
source	term_name	term_id	adjusted_p_value	negative_log10_of_adjusted_p_value	term_size	query_size	intersection_size	effective_domain_size	intersections
GO:MF	microtubule motor activity	GO:0003777	5.21484e-09	8.28276	68	912	20	20195	DNAH11,DNAH14,KIF26B,KIF5C,DNAH7,KIF15,KIF11,KIF20B,KIF14,KIF18A,KIF23,KIF24,CENPE,KIFC1,KIF18B,KIF4A,KIF20A,DNAH6,KIF2C,DNAH9
GO:MF	tubulin binding	GO:0015631	7.29917e-09	8.13673	385	1292	62	20195	AGBL4,DCDC1,MAP1B,KIF26B,BRCA2,KATNAL2,KIF5C,PACRG,FMN2,TTLL9,TRIM36,TTLL7,KIF15,KIF11,NUSAP1,KIF20B,KIF14,TPX2,KIF18A,KIF23,KIF24,CENPF,CKAP5,GTSE1,CENPE,KIFC1,KIF18B,RACGAP1,BRCA1,CENPJ,PRC1,KIF4A,DLGAP5,SKA2,TRAF3IP1,DCX,STMN2,SNCA,KIF20A,MAST2,NEDD1,KIF2C,BIRC5,SPC24,FAM83D,CEP295,SKA1,PLK1,KNSTRN,NDE1,B4GALT1,CEP70,PSRC1,CEP57L1,STRBP,KIF1A,DNM3,CCDC170,MAPRE2,GAS2,LYN,TOGARAM2
GO:MF	cytoskeletal protein binding	GO:0008092	1.0179e-08	7.9923	1008	1292	120	20195	AGBL4,SHROOM3,PDLIM5,UTRN,PALLD,MYO16,DCDC1,SYNPO2,EGFR,ADD3,CTNNA3,EPB41L3,DIAPH3,ANK3,MAP1B,KIF26B,CACNB2,IQGAP2,MYO3A,BRCA2,KATNAL2,PAWR,WASF3,KIF5C,KCNN2,PLEKHH2,PACRG,FMN2,STXBP5,TTLL9,DCDC2,WIPF1,TRIM36,COTL1,CACNA1C,TTLL7,MYO5C,CNTRL,KIF15,KIF11,NUSAP1,KIF20B,KIF14,TPX2,ANLN,KIF18A,KIF23,KIF24,CENPF,CKAP5,GTSE1,CENPE,KIFC1,KIF18B,RACGAP1,BRCA1,CENPJ,SYNE2,PRC1,KIF4A,DLGAP5,SKA2,UACA,RPH3AL…
GO:MF	cytoskeletal motor activity	GO:0003774	1.56867e-08	7.80447	115	545	20	20195	DNAH11,DNAH14,MYO16,KIF26B,MYO3A,KIF5C,DNAI1,DNAH7,MYO5C,KIF15,KIF11,KIF20B,KIF14,KIF18A,KIF23,KIF24,CENPE,KIFC1,KIF18B,KIF4A
GO:MF	microtubule binding	GO:0008017	9.07956e-08	7.04193	275	1292	48	20195	DCDC1,MAP1B,KIF26B,KATNAL2,KIF5C,FMN2,KIF15,KIF11,NUSAP1,KIF20B,KIF14,TPX2,KIF18A,KIF23,KIF24,CENPF,CKAP5,GTSE1,CENPE,KIFC1,KIF18B,RACGAP1,PRC1,KIF4A,DLGAP5,SKA2,TRAF3IP1,DCX,KIF20A,MAST2,KIF2C,BIRC5,SPC24,FAM83D,CEP295,SKA1,PLK1,KNSTRN,NDE1,PSRC1,CEP57L1,STRBP,KIF1A,DNM3,CCDC170,MAPRE2,GAS2,TOGARAM2
GO:MF	single-stranded DNA binding	GO:0003697	1.09117e-06	5.96211	125	851	23	20195	MMS22L,RAD51B,RBMS1,BRCA2,ZRANB3,RADX,SMC4,RAD51AP1,BLM,NEIL3,SMC2,RAD18,MCM10,HMGB2,NUCKS1,CDC45,MCM8,TDP1,DMC1,POLA1,RBBP8,RAD51,RAD54L
GO:MF	DNA secondary structure binding	GO:0000217	4.23555e-06	5.37309	37	788	12	20195	RAD51B,XRCC2,FANCM,GEN1,RAD51AP1,BLM,NEIL3,RAD18,HMGB2,CLSPN,RBBP8,LIN54
GO:MF	ATP-dependent activity	GO:0140657	6.38265e-06	5.195	575	498	39	20195	FIGN,DNAH11,DNAH14,RFC3,BRIP1,KIF26B,RAD51B,MYO3A,HELLS,ATAD5,XRCC2,ATAD2,POLQ,KATNAL2,KIF5C,ZRANB3,ABCA5,ZGRF1,ACSL4,FANCM,DNAH7,MYO5C,SLC27A6,SMC4,KIF15,KIF11,TOP2A,KIF20B,DNA2,BLM,KIF14,KIF18A,KIF23,KIF24,CENPE,KIFC1,KIF18B,SMC2,MSH5
GO:MF	catalytic activity, acting on DNA	GO:0140097	1.97577e-05	4.70426	243	851	31	20195	RFC3,BRIP1,RAD51B,HELLS,ATAD5,XRCC2,POLQ,ZRANB3,ZGRF1,FANCM,TOP2A,GEN1,DNA2,BLM,NEIL3,EXO1,MSH5,POLE2,POLD3,RAD54B,MGME1,MCM8,TDP1,DMC1,DSCC1,APLF,POLA1,RBBP8,RAD51,PIF1,RAD54L
GO:MF	cell adhesion molecule binding	GO:0050839	2.9176e-05	4.53497	562	154	19	20195	CNTN5,ROBO2,PDLIM5,PTPRO,UTRN,PALLD,PTPRM,TENM3,GFRA1,EGFR,KIRREL3,S1PR3,CTNNA3,DIAPH3,FBN1,ANK3,PKP4,CDH6,CPE
GO:MF	extracellular matrix structural constituent	GO:0005201	3.03596e-05	4.5177	174	396	17	20195	COL25A1,COL9A1,COL23A1,ANOS1,COL11A1,COL13A1,FBN1,FBN2,LTBP1,FRAS1,COL19A1,EDIL3,COL6A6,SPARC,LAMA2,COL21A1,COL4A6
GO:MF	plus-end-directed microtubule motor activity	GO:0008574	3.76691e-05	4.42401	17	492	7	20195	KIF5C,KIF11,KIF20B,KIF14,KIF18A,CENPE,KIF18B
GO:MF	extracellular matrix structural constituent conferring tensile strength	GO:0030020	3.85982e-05	4.41343	41	396	9	20195	COL25A1,COL9A1,COL23A1,COL11A1,COL13A1,COL19A1,COL6A6,COL21A1,COL4A6
GO:MF	adenyl ribonucleotide binding	GO:0032559	3.93034e-05	4.40557	1558	555	79	20195	FIGN,DNAH11,DNAH14,MYO16,MAGI3,EPHA6,KCNT2,EGFR,PRAG1,BRIP1,PRKAA2,VRK2,KIF26B,PDE4D,CAMK4,KSR2,STK32B,NEK5,RAD51B,MYO3A,PDE10A,HELLS,ATAD5,XRCC2,ATAD2,POLQ,CHEK1,KATNAL2,KIF5C,ZRANB3,RPS6KA6,TTLL9,CHST15,ABCA5,NUAK1,MAST4,ACSL4,FANCM,HCN1,AK7,MAP3K20,NRK,TTLL7,DNAH7,MYO5C,CDKL2,SMC4,KIF15,MELK,KIF11,TOP2A,MKI67,KIF20B,DNA2,BLM,VRK1,KIF14,BUB1B,KIF18A,KIF23,CIT,KIF24,CDK1,PLK4,BUB1,CENPE,TTK,PBK,…
GO:MF	adenyl nucleotide binding	GO:0030554	6.39422e-05	4.19421	1659	555	82	20195	FIGN,DNAH11,DNAH14,MYO16,MAGI3,EPHA6,KCNT2,EGFR,PRAG1,DPYD,BRIP1,PRKAA2,VRK2,KIF26B,PDE4D,CAMK4,KSR2,STK32B,NEK5,RAD51B,MYO3A,PDE10A,HELLS,ATAD5,XRCC2,ATAD2,POLQ,CHEK1,KATNAL2,KIF5C,ALDH1A1,ZRANB3,RPS6KA6,TTLL9,CHST15,ABCA5,NUAK1,MAST4,ACSL4,FANCM,LBR,HCN1,AK7,MAP3K20,NRK,TTLL7,DNAH7,MYO5C,CDKL2,SMC4,KIF15,MELK,KIF11,TOP2A,MKI67,KIF20B,DNA2,BLM,VRK1,KIF14,BUB1B,KIF18A,KIF23,CIT,KIF24,CDK1,PLK4,BU…
GO:MF	ATP binding	GO:0005524	0.000130377	3.8848	1495	884	107	20195	FIGN,DNAH11,DNAH14,MYO16,MAGI3,EPHA6,KCNT2,EGFR,PRAG1,BRIP1,PRKAA2,VRK2,KIF26B,CAMK4,KSR2,STK32B,NEK5,RAD51B,MYO3A,HELLS,ATAD5,XRCC2,ATAD2,POLQ,CHEK1,KATNAL2,KIF5C,ZRANB3,RPS6KA6,TTLL9,ABCA5,NUAK1,MAST4,ACSL4,FANCM,AK7,MAP3K20,NRK,TTLL7,DNAH7,MYO5C,CDKL2,SMC4,KIF15,MELK,KIF11,TOP2A,MKI67,KIF20B,DNA2,BLM,VRK1,KIF14,BUB1B,KIF18A,KIF23,CIT,KIF24,CDK1,PLK4,BUB1,CENPE,TTK,PBK,KIFC1,KIF18B,SMC2,MSH5,CD…
GO:MF	ATP-dependent activity, acting on DNA	GO:0008094	0.000152663	3.81627	126	851	20	20195	RFC3,BRIP1,RAD51B,HELLS,ATAD5,XRCC2,POLQ,ZRANB3,FANCM,TOP2A,DNA2,BLM,MSH5,RAD54B,MCM8,DMC1,DSCC1,RAD51,PIF1,RAD54L
GO:MF	heparin binding	GO:0008201	0.000270876	3.56723	173	57	7	20195	COL25A1,MDK,COL23A1,ADAMTS3,ANOS1,COL11A1,COL13A1
GO:MF	anaphase-promoting complex binding	GO:0010997	0.000570645	3.24363	9	1014	6	20195	CLSPN,FBXO5,CDC20,CCNF,PLK1,UBE2S
GO:MF	protein serine kinase activity	GO:0106310	0.000958277	3.01851	360	1279	47	20195	PRKAA2,VRK2,CAMK4,KSR2,STK32B,NEK5,MYO3A,CHEK1,RPS6KA6,NUAK1,MAST4,MAP3K20,NRK,CDKL2,MELK,VRK1,BUB1B,CIT,CDK1,PLK4,BUB1,TTK,PBK,CDC7,MASTL,AURKB,CHEK2,PRKD1,NEK2,CAMKK1,STK26,MAST2,RPS6KA2,AURKA,PRKCE,NEK10,STK17B,PLK1,PAK6,DAPK2,MAP3K21,TTN,CDK19,LIMK2,CDKL4,MAP2K1,ULK4
GO:MF	cell-cell adhesion mediator activity	GO:0098632	0.00149084	2.82657	55	37	4	20195	CNTN5,ROBO2,PDLIM5,PALLD
GO:MF	four-way junction DNA binding	GO:0000400	0.00150622	2.82211	17	530	6	20195	RAD51B,XRCC2,FANCM,GEN1,BLM,HMGB2
GO:MF	protein serine/threonine kinase activity	GO:0004674	0.00191215	2.71848	436	1279	53	20195	EGFR,PRKAA2,VRK2,LTBP1,CAMK4,KSR2,STK32B,NEK5,MYO3A,CHEK1,RPS6KA6,NUAK1,MAST4,MAP3K20,NRK,CDKL2,MELK,VRK1,BUB1B,CIT,CDK1,PLK4,BUB1,TTK,PBK,CDC7,MASTL,AURKB,CHEK2,PRKD1,NEK2,CAMKK1,STK26,MAST2,PHKA1,TGFBR3,RPS6KA2,AURKA,PRKCE,NEK10,STK17B,PLK1,PAK6,ACVR2A,DAPK2,MAP3K21,TTN,PPM1D,CDK19,LIMK2,CDKL4,MAP2K1,ULK4
GO:MF	purine ribonucleotide binding	GO:0032555	0.00198428	2.7024	1917	896	126	20195	FIGN,DNAH11,DNAH14,MYO16,MAGI3,EPHA6,KCNT2,EGFR,GNAI1,PRAG1,BRIP1,PRKAA2,VRK2,KIF26B,PDE4D,CAMK4,KSR2,STK32B,NEK5,RAD51B,MYO3A,PDE10A,RRAS2,HELLS,ATAD5,XRCC2,ATAD2,POLQ,CHEK1,KATNAL2,KIF5C,ZRANB3,RPS6KA6,TTLL9,CHST15,ABCA5,NUAK1,MAST4,ACSL4,FANCM,GUCY1B1,HCN1,AK7,MAP3K20,NRK,TTLL7,DNAH7,MYO5C,CDKL2,SMC4,KIF15,MELK,KIF11,TOP2A,MKI67,KIF20B,DNA2,BLM,VRK1,KIF14,BUB1B,KIF18A,KIF23,CIT,KIF24,CDK1,PLK4…
GO:MF	calmodulin binding	GO:0005516	0.00203984	2.6904	204	1202	30	20195	ADD3,CAMK4,IQGAP2,MYO3A,KCNN2,SYT7,RASGRF2,ENKUR,CACNA1C,AKAP12,MYO5C,ASPM,SLC8A3,CFAP221,KCNQ5,FBXL2,GAP43,CAMKK1,PHKA1,IQGAP1,IQGAP3,SCN5A,SPTBN1,RIT2,MYO1D,ARPP21,DAPK2,SPA17,TTN,PDE1C
GO:MF	carbohydrate derivative binding	GO:0097367	0.00212788	2.67205	2301	896	146	20195	FIGN,COL25A1,MDK,DNAH11,DNAH14,COL23A1,MYO16,ADAMTS3,ANOS1,MAGI3,EPHA6,KCNT2,COL11A1,COL13A1,EGFR,GNAI1,PRAG1,BRIP1,PRKAA2,FBN1,VRK2,KIF26B,LPAR1,PDE4D,CAMK4,KSR2,STK32B,NEK5,RAD51B,MYO3A,PDE10A,RRAS2,HELLS,ATAD5,FBLN7,XRCC2,ATAD2,POLQ,CHEK1,KATNAL2,KIF5C,SLIT2,TENM1,ZRANB3,RPS6KA6,TTLL9,CHST15,ABCA5,NUAK1,MAST4,ACSL4,FANCM,GUCY1B1,HCN1,AK7,MAP3K20,NRK,TTLL7,DNAH7,MYO5C,CDKL2,SMC4,KIF15,MELK,KIF1…
GO:MF	glycosaminoglycan binding	GO:0005539	0.0026721	2.57315	244	57	7	20195	COL25A1,MDK,COL23A1,ADAMTS3,ANOS1,COL11A1,COL13A1
GO:MF	ribonucleotide binding	GO:0032553	0.00306328	2.51381	1934	896	126	20195	FIGN,DNAH11,DNAH14,MYO16,MAGI3,EPHA6,KCNT2,EGFR,GNAI1,PRAG1,BRIP1,PRKAA2,VRK2,KIF26B,PDE4D,CAMK4,KSR2,STK32B,NEK5,RAD51B,MYO3A,PDE10A,RRAS2,HELLS,ATAD5,XRCC2,ATAD2,POLQ,CHEK1,KATNAL2,KIF5C,ZRANB3,RPS6KA6,TTLL9,CHST15,ABCA5,NUAK1,MAST4,ACSL4,FANCM,GUCY1B1,HCN1,AK7,MAP3K20,NRK,TTLL7,DNAH7,MYO5C,CDKL2,SMC4,KIF15,MELK,KIF11,TOP2A,MKI67,KIF20B,DNA2,BLM,VRK1,KIF14,BUB1B,KIF18A,KIF23,CIT,KIF24,CDK1,PLK4…
GO:MF	cell adhesion mediator activity	GO:0098631	0.00310546	2.50787	66	37	4	20195	CNTN5,ROBO2,PDLIM5,PALLD
GO:MF	purine ribonucleoside triphosphate binding	GO:0035639	0.00380059	2.42015	1848	896	121	20195	FIGN,DNAH11,DNAH14,MYO16,MAGI3,EPHA6,KCNT2,EGFR,GNAI1,PRAG1,BRIP1,PRKAA2,VRK2,KIF26B,CAMK4,KSR2,STK32B,NEK5,RAD51B,MYO3A,RRAS2,HELLS,ATAD5,XRCC2,ATAD2,POLQ,CHEK1,KATNAL2,KIF5C,ZRANB3,RPS6KA6,TTLL9,ABCA5,NUAK1,MAST4,ACSL4,FANCM,GUCY1B1,AK7,MAP3K20,NRK,TTLL7,DNAH7,MYO5C,CDKL2,SMC4,KIF15,MELK,KIF11,TOP2A,MKI67,KIF20B,DNA2,BLM,VRK1,KIF14,BUB1B,KIF18A,KIF23,CIT,KIF24,CDK1,PLK4,BUB1,CENPE,TTK,PBK,KIFC1…
GO:MF	purine nucleotide binding	GO:0017076	0.00383172	2.41661	2019	896	130	20195	FIGN,DNAH11,DNAH14,MYO16,MAGI3,EPHA6,KCNT2,EGFR,GNAI1,PRAG1,DPYD,BRIP1,PRKAA2,VRK2,KIF26B,PDE4D,CAMK4,KSR2,STK32B,NEK5,RAD51B,MYO3A,PDE10A,RRAS2,HELLS,ATAD5,XRCC2,ATAD2,POLQ,CHEK1,KATNAL2,KIF5C,ALDH1A1,ZRANB3,RPS6KA6,TTLL9,CHST15,ABCA5,NUAK1,MAST4,ACSL4,FANCM,GUCY1B1,LBR,HCN1,AK7,MAP3K20,NRK,TTLL7,DNAH7,MYO5C,CDKL2,SMC4,KIF15,MELK,KIF11,TOP2A,MKI67,KIF20B,DNA2,BLM,VRK1,KIF14,BUB1B,KIF18A,KIF23,CI…
GO:MF	nucleotide binding	GO:0000166	0.00440288	2.35626	2178	896	138	20195	FIGN,DNAH11,DNAH14,MYO16,MAGI3,EPHA6,KCNT2,EGFR,GNAI1,PRAG1,DPYD,BRIP1,PRKAA2,VRK2,KIF26B,PDE4D,CAMK4,KSR2,STK32B,NEK5,RAD51B,MYO3A,PDE10A,RRAS2,HELLS,ATAD5,XRCC2,ATAD2,POLQ,CHEK1,KATNAL2,KIF5C,ALDH1A1,ZRANB3,RPS6KA6,TTLL9,CHST15,ABCA5,FHIT,NUAK1,NOX4,MAST4,ACSL4,FANCM,GUCY1B1,LBR,HCN1,AK7,MAP3K20,NRK,TTLL7,DNAH7,MYO5C,SLC27A6,CDKL2,SMC4,KIF15,MELK,KIF11,TOP2A,MKI67,KIF20B,DNA2,BLM,VRK1,KIF14,BUB…
GO:MF	nucleoside phosphate binding	GO:1901265	0.00450696	2.34612	2179	896	138	20195	FIGN,DNAH11,DNAH14,MYO16,MAGI3,EPHA6,KCNT2,EGFR,GNAI1,PRAG1,DPYD,BRIP1,PRKAA2,VRK2,KIF26B,PDE4D,CAMK4,KSR2,STK32B,NEK5,RAD51B,MYO3A,PDE10A,RRAS2,HELLS,ATAD5,XRCC2,ATAD2,POLQ,CHEK1,KATNAL2,KIF5C,ALDH1A1,ZRANB3,RPS6KA6,TTLL9,CHST15,ABCA5,FHIT,NUAK1,NOX4,MAST4,ACSL4,FANCM,GUCY1B1,LBR,HCN1,AK7,MAP3K20,NRK,TTLL7,DNAH7,MYO5C,SLC27A6,CDKL2,SMC4,KIF15,MELK,KIF11,TOP2A,MKI67,KIF20B,DNA2,BLM,VRK1,KIF14,BUB…
GO:MF	actin binding	GO:0003779	0.00473767	2.32444	451	316	21	20195	SHROOM3,PDLIM5,UTRN,PALLD,MYO16,SYNPO2,EGFR,ADD3,CTNNA3,EPB41L3,DIAPH3,MAP1B,CACNB2,IQGAP2,MYO3A,PAWR,WASF3,PLEKHH2,PACRG,FMN2,WIPF1
GO:MF	sulfur compound binding	GO:1901681	0.00569145	2.24478	274	57	7	20195	COL25A1,MDK,COL23A1,ADAMTS3,ANOS1,COL11A1,COL13A1
GO:MF	3',5'-cyclic-AMP phosphodiesterase activity	GO:0004115	0.00754636	2.12226	18	657	6	20195	PDE7B,PDE4D,PDE10A,PDE3B,PDE8A,ENPP1
GO:MF	muscle alpha-actinin binding	GO:0051371	0.00791139	2.10175	15	68	3	20195	PDLIM5,PALLD,SYNPO2
GO:MF	protein domain specific binding	GO:0019904	0.00945032	2.02455	690	556	39	20195	ESRRG,ARHGAP6,ZBTB16,VRK2,LEF1,LRP2,DAPL1,LPAR1,TRPS1,ELMO1,CHEK1,CXADR,PAWR,KCNN2,LDB2,GNG12,ADAM19,ENKUR,SH3BGRL2,WIPF1,ICA1,DOCK4,GHR,PLSCR4,LBR,WNT5A,ARHGAP29,DOCK3,PLSCR1,KIF20B,KIF14,CDC25C,CIT,CENPJ,CHAF1A,TUBB,HMGB2,RRM1,SHCBP1
GO:MF	5'-flap endonuclease activity	GO:0017108	0.0113156	1.94632	8	495	4	20195	ZGRF1,GEN1,DNA2,EXO1
GO:MF	GTPase activator activity	GO:0005096	0.012075	1.91811	284	844	28	20195	ADGRB3,ARHGAP6,SGSM1,IQGAP2,ALDH1A1,ARHGAP24,STXBP5,RGS20,DOCK4,RASAL2,SIPA1L2,ARHGAP29,DOCK3,ECT2,DEPDC1B,ARHGAP11B,RACGAP1,ARHGAP11A,DEPDC1,RGS3,STXBP5L,ARHGAP19,SYDE2,RGS6,TBC1D1,ARHGAP20,IQGAP1,IQGAP3
GO:MF	DNA helicase activity	GO:0003678	0.0142088	1.84744	59	846	11	20195	RFC3,BRIP1,POLQ,FANCM,DNA2,BLM,RAD54B,MCM8,DSCC1,RAD51,PIF1
GO:MF	single-stranded DNA helicase activity	GO:0017116	0.0147258	1.83192	23	846	7	20195	RFC3,POLQ,DNA2,MCM8,DSCC1,RAD51,PIF1
GO:MF	SH3 domain binding	GO:0017124	0.0187064	1.72801	125	473	12	20195	ARHGAP6,LRP2,ELMO1,ADAM19,ENKUR,SH3BGRL2,WIPF1,DOCK4,PLSCR4,DOCK3,PLSCR1,CIT
GO:MF	heparan sulfate binding	GO:1904399	0.0198094	1.70313	4	53	2	20195	MDK,COL11A1
GO:MF	flap endonuclease activity	GO:0048256	0.0199731	1.69955	9	495	4	20195	ZGRF1,GEN1,DNA2,EXO1
GO:MF	transmembrane receptor protein tyrosine phosphatase activity	GO:0005001	0.0214049	1.66949	17	83	3	20195	PTPRO,PTPRM,PTPRN2
GO:MF	transmembrane receptor protein phosphatase activity	GO:0019198	0.0214049	1.66949	17	83	3	20195	PTPRO,PTPRM,PTPRN2
GO:MF	mannosyl-oligosaccharide mannosidase activity	GO:0015924	0.0217896	1.66175	9	23	2	20195	MAN2A1,MAN1A1
GO:MF	cell adhesive protein binding involved in bundle of His cell-Purkinje myocyte communication	GO:0086083	0.0293547	1.53232	5	1204	4	20195	DSG2,DSC2,DSP,PKP2
GO:MF	anion binding	GO:0043168	0.0355423	1.44925	2458	669	115	20195	FIGN,MDK,DNAH11,DNAH14,MYO16,MAGI3,EPHA6,KCNT2,COL11A1,EGFR,GNAI1,PRAG1,DPYD,BRIP1,PRKAA2,VRK2,KIF26B,LPAR1,PDE4D,CAMK4,IQGAP2,KSR2,STK32B,CLVS2,NEK5,RAD51B,MYO3A,PDE10A,RRAS2,NR2F2,HELLS,ATAD5,XRCC2,ATAD2,POLQ,CHEK1,KATNAL2,PLOD2,KIF5C,SYT7,PAM,ZRANB3,RPS6KA6,TTLL9,CHST15,ABCA5,CYP27C1,NUAK1,NOX4,MAST4,ACSL4,FANCM,GUCY1B1,LBR,HCN1,AK7,MAP3K20,NRK,TTLL7,DNAH7,MYO5C,CDKL2,SMC4,KIF15,MELK,KIF11,TOP…
GO:MF	transferase activity, transferring phosphorus-containing groups	GO:0016772	0.0372428	1.42896	966	1291	92	20195	MAGI3,EPHA6,EGFR,PRAG1,PRKAA2,CDS1,VRK2,LTBP1,CAMK4,KSR2,STK32B,NEK5,MYO3A,POLQ,CHEK1,CERKL,PKIA,RPS6KA6,FHIT,NUAK1,MAST4,PARP8,AK7,MAP3K20,NRK,CDKL2,MELK,VRK1,BUB1B,CIT,CDK1,PLK4,BUB1,TTK,PBK,CDC7,POLE2,MASTL,AURKB,POLD3,CHEK2,XYLB,PRKD1,MB21D2,ERBB4,NEK2,AK8,PRKAR2B,CAMKK1,STK26,POLA1,MAST2,PHKA1,TGFBR3,RPS6KA2,AURKA,SH3KBP1,PRKCE,TK1,PI4K2B,NME9,NME5,MUSK,NEK10,TIPARP,STK17B,PLK1,PAK6,ADK,NT5C…
GO:BP	cell cycle process	GO:0022402	9.86735e-44	43.0058	1281	879	176	21110	SLF1,MYO16,DCDC1,EGFR,GNAI1,FBXL7,CENPK,BRIP1,CEP135,ANK3,LEF1,PKP4,RAD51B,KNTC1,ATAD5,DTL,BRCA2,XRCC2,CHEK1,PKIA,FMN2,MTBP,TEX15,CEP126,TRIM36,FANCM,WNT5A,MAP3K20,RNASEH2B,PLSCR1,RRM2,EZH2,SMC4,KIF15,MELK,KIF11,KNL1,NCAPG,NUSAP1,ASPM,TOP2A,MKI67,NDC80,E2F7,KIF20B,GEN1,DNA2,RAD51AP1,BLM,VRK1,NUF2,ECT2,KIF14,TPX2,CDC25C,ANLN,BUB1B,KIF18A,KIF23,CIT,MND1,CDK1,CKAP2,CENPF,PLK4,STIL,SKA3,CEP192,BUB1,S…
GO:BP	mitotic cell cycle	GO:0000278	2.22794e-39	38.6521	922	879	141	21110	MYO16,DCDC1,EGFR,GNAI1,FBXL7,CENPK,ANK3,RAD51B,KNTC1,ATAD5,DTL,BRCA2,XRCC2,CHEK1,PKIA,MTBP,CEP126,TRIM36,MAP3K20,RNASEH2B,SHB,RRM2,EZH2,SMC4,KIF15,MELK,KIF11,NCAPG,NUSAP1,MKI67,NDC80,E2F7,KIF20B,GEN1,DNA2,BLM,VRK1,NUF2,ECT2,KIF14,TPX2,CDC25C,ANLN,BUB1B,KIF18A,KIF23,CIT,CDK1,CKAP2,CENPF,PLK4,STIL,SKA3,CEP192,BUB1,SGO1,CKAP5,GTSE1,CENPE,TTK,PBK,KIFC1,KIF18B,RACGAP1,SMC2,CDCA2,BARD1,BRCA1,RBL1,CDC7,…
GO:BP	mitotic cell cycle process	GO:1903047	4.06111e-38	37.3914	766	879	126	21110	MYO16,DCDC1,EGFR,GNAI1,FBXL7,CENPK,ANK3,RAD51B,KNTC1,ATAD5,DTL,BRCA2,CHEK1,PKIA,MTBP,CEP126,TRIM36,MAP3K20,RNASEH2B,RRM2,EZH2,SMC4,KIF15,MELK,KIF11,NCAPG,NUSAP1,MKI67,NDC80,E2F7,KIF20B,GEN1,DNA2,BLM,VRK1,NUF2,ECT2,KIF14,TPX2,CDC25C,ANLN,BUB1B,KIF18A,KIF23,CIT,CDK1,CKAP2,CENPF,STIL,CEP192,BUB1,SGO1,CKAP5,GTSE1,CENPE,TTK,PBK,KIFC1,KIF18B,RACGAP1,SMC2,CDCA2,BARD1,BRCA1,RBL1,CDC7,GINS1,FANCD2,CENPJ,N…
GO:BP	cell cycle	GO:0007049	5.64463e-37	36.2484	1825	879	203	21110	FIGN,SLF1,CABLES1,MYO16,DCDC1,EGFR,GNAI1,FBXL7,MIS18BP1,CENPK,BRIP1,CEP135,ANK3,ZFHX3,LEF1,PKP4,RAD51B,NR2F2,HELLS,KNTC1,ATAD5,DTL,BRCA2,XRCC2,CHEK1,PKIA,FMN2,MTBP,TEX15,CEP126,TRIM36,FANCM,PLAGL1,WNT5A,MAP3K20,CDKL2,RNASEH2B,SHB,PLSCR1,CNTRL,RRM2,EZH2,SMC4,KIF15,MELK,KIF11,KNL1,NCAPG,NUSAP1,ASPM,TOP2A,MKI67,NDC80,E2F7,KIF20B,GEN1,DNA2,RAD51AP1,BLM,VRK1,NUF2,ECT2,KIF14,TPX2,CDC25C,ANLN,BUB1B,KIF1…
GO:BP	nuclear division	GO:0000280	4.89805e-33	32.31	440	879	89	21110	CENPK,BRIP1,RAD51B,KNTC1,BRCA2,CHEK1,FMN2,MTBP,TEX15,FANCM,WNT5A,SMC4,KIF15,KIF11,NCAPG,NUSAP1,ASPM,TOP2A,MKI67,NDC80,KIF20B,GEN1,RAD51AP1,NUF2,KIF14,TPX2,CDC25C,ANLN,BUB1B,KIF18A,KIF23,MND1,CENPF,CEP192,BUB1,SGO1,CENPE,TTK,KIFC1,KIF18B,RACGAP1,SMC2,CDCA2,MSH5,FANCD2,MYBL1,NCAPG2,MASTL,AURKB,RAD21,SGO2,FANCA,PRC1,KIF4A,DLGAP5,FBXO5,CHEK2,NCAPD3,RAD54B,CCNB1,DMC1,NEK2,C11ORF80,BORA,SYCP2L,PTTG1,RM…
GO:BP	chromosome segregation	GO:0007059	2.75541e-32	31.5598	423	850	85	21110	CENPK,BRIP1,KNTC1,FMN2,TEX15,FANCM,PLSCR1,SMC4,KIF15,KIF11,KNL1,NCAPG,NUSAP1,ASPM,TOP2A,MKI67,NDC80,GEN1,NUF2,ECT2,KIF14,TPX2,BUB1B,KIF18A,KIF23,MND1,CENPF,STIL,SKA3,CEP192,BUB1,SGO1,CENPE,TTK,KIFC1,KIF18B,RACGAP1,SMC2,CDCA2,MSH5,BRCA1,FANCD2,CENPJ,RAD18,NCAPG2,AURKB,RAD21,TUBB,ESCO2,SGO2,TACC3,PRC1,KIF4A,DLGAP5,FBXO5,CHEK2,NCAPD3,SKA2,OIP5,CCNB1,DMC1,NEK2,NR3C1,PTTG1,CDC6,RMI1,NDC1,CDC20,HJURP,C…
GO:BP	cell division	GO:0051301	6.48534e-31	30.1881	661	1181	125	21110	FIGN,MDK,CABLES1,DCDC1,GNAI1,FBXL7,MIS18BP1,BRIP1,ZBTB16,ANK3,LEF1,PKP4,HELLS,KNTC1,BRCA2,FMN2,TRIM36,CNTRL,SMC4,KIF11,KNL1,NCAPG,NUSAP1,ASPM,TOP2A,NDC80,E2F7,KIF20B,BLM,VRK1,NUF2,ECT2,KIF14,TPX2,CDC25C,ANLN,BUB1B,KIF23,CIT,CDK1,CKAP2,CENPF,PLK4,SKA3,BUB1,SGO1,CKAP5,CENPE,KIFC1,KIF18B,RACGAP1,SMC2,CDCA2,RBL1,CDC7,CENPJ,NCAPG2,MASTL,AURKB,RAD21,TUBA1B,TUBB,SGO2,TACC3,PRC1,KIF4A,FBXO5,CHEK2,NCAPD3,…
GO:BP	organelle fission	GO:0048285	1.80363e-29	28.7439	487	879	89	21110	CENPK,BRIP1,RAD51B,KNTC1,BRCA2,CHEK1,FMN2,MTBP,TEX15,FANCM,WNT5A,SMC4,KIF15,KIF11,NCAPG,NUSAP1,ASPM,TOP2A,MKI67,NDC80,KIF20B,GEN1,RAD51AP1,NUF2,KIF14,TPX2,CDC25C,ANLN,BUB1B,KIF18A,KIF23,MND1,CENPF,CEP192,BUB1,SGO1,CENPE,TTK,KIFC1,KIF18B,RACGAP1,SMC2,CDCA2,MSH5,FANCD2,MYBL1,NCAPG2,MASTL,AURKB,RAD21,SGO2,FANCA,PRC1,KIF4A,DLGAP5,FBXO5,CHEK2,NCAPD3,RAD54B,CCNB1,DMC1,NEK2,C11ORF80,BORA,SYCP2L,PTTG1,RM…
GO:BP	regulation of cell cycle process	GO:0010564	5.61191e-29	28.2509	726	875	109	21110	SLF1,MYO16,DCDC1,EGFR,GNAI1,BRIP1,LEF1,PKP4,RAD51B,KNTC1,ATAD5,DTL,BRCA2,CHEK1,PKIA,MTBP,WNT5A,MAP3K20,RNASEH2B,PLSCR1,RRM2,EZH2,SMC4,KIF15,KIF11,NCAPG,NUSAP1,MKI67,NDC80,E2F7,KIF20B,GEN1,DNA2,RAD51AP1,BLM,NUF2,ECT2,KIF14,TPX2,CDC25C,ANLN,BUB1B,KIF23,CIT,CDK1,CENPF,PLK4,STIL,BUB1,GTSE1,CENPE,TTK,PBK,RACGAP1,SMC2,CDCA2,BARD1,BRCA1,RBL1,CDC7,FANCD2,CENPJ,RAD18,NCAPG2,AURKB,RAD21,CLSPN,DBF4,TACC3,PR…
GO:BP	microtubule cytoskeleton organization	GO:0000226	2.16801e-27	26.6639	653	850	99	21110	FIGN,CFAP47,SPAG17,GNAI1,HYDIN,PRKAA2,CEP135,MAP1B,EFNA5,BRCA2,XRCC2,CHEK1,CFAP69,KATNAL2,MAP7,RSPH9,FMN2,TTLL9,CEP126,DNAI1,TRIM36,CFAP206,SPEF2,TTLL7,DNAH7,PHLDB2,KIF15,KIF11,NUSAP1,ASPM,NDC80,GEN1,NUF2,TPX2,KIF18A,KIF23,KIF24,CDK1,CKAP2,PLK4,STIL,SKA3,CEP192,SGO1,CKAP5,CENPE,TTK,KIFC1,KIF18B,RACGAP1,BRCA1,CEP152,CENPJ,RTTN,SYNE2,AURKB,TUBA1B,TUBB,TACC3,PRC1,KIF4A,DLGAP5,PCLAF,FBXO5,CHEK2,SKA2,…
GO:BP	nuclear chromosome segregation	GO:0098813	2.55261e-27	26.593	324	850	69	21110	CENPK,BRIP1,KNTC1,FMN2,TEX15,FANCM,SMC4,KIF15,KIF11,KNL1,NCAPG,NUSAP1,ASPM,TOP2A,NDC80,GEN1,NUF2,ECT2,KIF14,TPX2,BUB1B,KIF18A,KIF23,MND1,CENPF,CEP192,BUB1,SGO1,CENPE,TTK,KIFC1,KIF18B,RACGAP1,SMC2,MSH5,FANCD2,NCAPG2,AURKB,RAD21,SGO2,TACC3,PRC1,KIF4A,DLGAP5,FBXO5,CHEK2,NCAPD3,CCNB1,DMC1,NEK2,PTTG1,CDC6,RMI1,NDC1,CDC20,CDCA8,KIF2C,ESPL1,BIRC5,SPC24,NCAPD2,KMT5A,INCENP,UBE2C,NCAPH,CCNB2,FAM83D,AURKA,…
GO:BP	microtubule-based process	GO:0007017	1.18858e-26	25.925	943	985	131	21110	FIGN,AGBL4,DNAH11,CFAP47,DNAH14,SPAG17,TEKT1,GNAI1,HYDIN,PRKAA2,CFAP54,CEP135,MAP1B,KIF26B,LCA5,EFNA5,LZTFL1,BRCA2,XRCC2,CHEK1,CFAP69,KATNAL2,KIF5C,TTC29,CFAP61,MAP7,RSPH9,ENKUR,FMN2,TTLL9,CEP126,DNAI1,TRIM36,ZBBX,CFAP206,SPEF2,TTLL7,DNAH7,PHLDB2,KIF15,KIF11,NUSAP1,ASPM,NDC80,KIF20B,GEN1,NUF2,KIF14,TPX2,KIF18A,KIF23,KIF24,CDK1,CKAP2,PLK4,STIL,SKA3,CEP192,SGO1,CKAP5,GTSE1,CENPE,TTK,KIFC1,KIF18B,RA…
GO:BP	positive regulation of cell cycle process	GO:0090068	4.91999e-26	25.308	256	875	61	21110	SLF1,EGFR,LEF1,PKP4,RAD51B,ATAD5,DTL,MTBP,WNT5A,MAP3K20,PLSCR1,RRM2,EZH2,SMC4,NCAPG,NUSAP1,NDC80,E2F7,KIF20B,GEN1,RAD51AP1,ECT2,KIF14,CDC25C,KIF23,CIT,CDK1,PLK4,STIL,PBK,RACGAP1,SMC2,CDC7,CENPJ,RAD18,NCAPG2,AURKB,RAD21,DBF4,DLGAP5,RRM1,FBXO5,CHEK2,NCAPD3,CCNB1,DBF4B,CDC6,CDCA8,ESPL1,E2F8,BIRC5,NCAPD2,INCENP,UBE2C,GPSM2,NCAPH,FAM83D,AURKA,MAD2L1,STOX1,PRKCE
GO:BP	cytoskeleton organization	GO:0007010	1.25584e-25	24.9011	1513	1150	191	21110	FIGN,MDK,SHROOM3,CFAP47,PDLIM5,UTRN,PALLD,SPAG17,ARHGAP6,SYNPO2,GNAI1,ADD3,HYDIN,CTNNA3,EPB41L3,DIAPH3,PRKAA2,CLRN1,CEP135,ANK3,MAP1B,EFNA5,LPAR1,IQGAP2,MYO3A,ELMO1,BRCA2,XRCC2,CHEK1,CXADR,CFAP69,KANK1,KATNAL2,PAWR,WASF3,MAP7,PLEKHH2,RSPH9,SLIT2,TENM1,PAM,FMN2,TTLL9,WIPF1,CEP126,DNAI1,TRIM36,COTL1,MAST4,CFAP206,SPEF2,MAP3K20,NRK,TTLL7,DNAH7,MYO5C,JAM3,PHLDB2,SMAD3,CNTRL,KIF15,KIF11,LMNB1,NUSAP1,A…
GO:BP	mitotic nuclear division	GO:0140014	4.40503e-24	23.3561	280	1195	71	21110	CENPK,KNTC1,CHEK1,MTBP,SMC4,KIF15,KIF11,NCAPG,NUSAP1,MKI67,NDC80,KIF20B,GEN1,NUF2,KIF14,TPX2,CDC25C,ANLN,BUB1B,KIF18A,KIF23,CENPF,CEP192,BUB1,SGO1,CENPE,TTK,KIFC1,KIF18B,RACGAP1,SMC2,CDCA2,NCAPG2,AURKB,RAD21,SGO2,PRC1,KIF4A,DLGAP5,FBXO5,CHEK2,NCAPD3,CCNB1,NEK2,BORA,PTTG1,CDC20,CDCA8,KIF2C,ESPL1,BIRC5,SPC24,NCAPD2,KMT5A,INCENP,UBE2C,NCAPH,AURKA,MAD2L1,FBXO43,MYBL2,PLK1,MZT1,KNSTRN,UBE2S,NDE1,SPDL1…
GO:BP	mitotic sister chromatid segregation	GO:0000070	1.99353e-23	22.7004	190	1168	57	21110	CENPK,KNTC1,SMC4,KIF15,KIF11,NCAPG,NUSAP1,NDC80,GEN1,NUF2,KIF14,TPX2,BUB1B,KIF18A,KIF23,CENPF,CEP192,BUB1,SGO1,CENPE,TTK,KIFC1,KIF18B,RACGAP1,SMC2,NCAPG2,AURKB,RAD21,SGO2,PRC1,KIF4A,DLGAP5,FBXO5,CHEK2,NCAPD3,CCNB1,NEK2,PTTG1,CDC20,CDCA8,KIF2C,ESPL1,BIRC5,SPC24,NCAPD2,KMT5A,INCENP,NCAPH,MAD2L1,MYBL2,PLK1,MZT1,KNSTRN,SPDL1,PSRC1,TTN,CDCA5
GO:BP	regulation of cell cycle	GO:0051726	6.07002e-23	22.2168	1130	875	129	21110	SLF1,CABLES1,MYO16,DCDC1,EGFR,GNAI1,BRIP1,ZFHX3,LEF1,PKP4,RAD51B,NR2F2,KNTC1,ATAD5,DTL,BRCA2,CHEK1,PKIA,MTBP,TRIM36,PLAGL1,WNT5A,MAP3K20,CDKL2,RNASEH2B,SHB,PLSCR1,RRM2,EZH2,SMC4,KIF15,KIF11,NCAPG,NUSAP1,ASPM,MKI67,NDC80,E2F7,KIF20B,GEN1,DNA2,RAD51AP1,BLM,NUF2,ECT2,KIF14,TPX2,CDC25C,ANLN,BUB1B,KIF23,CIT,CDK1,CENPF,PLK4,STIL,BUB1,GTSE1,CENPE,TTK,PBK,RACGAP1,SMC2,CDCA2,BARD1,BRCA1,RBL1,CDC7,FANCD2,C…
GO:BP	organelle organization	GO:0006996	9.57258e-23	22.019	3608	879	275	21110	FIGN,MDK,SHROOM3,MAN2A1,CFAP47,SLF1,PDLIM5,AHI1,UTRN,PALLD,SPAG17,RFC3,TEKT1,ARHGAP6,SYNPO2,GNAI1,ADD3,HYDIN,CTNNA3,EPB41L3,DIAPH3,CENPK,BRIP1,PRKAA2,CLRN1,CFAP54,SCLT1,CEP135,ANK3,MAP1B,CDS1,LCA5,EFNA5,RELN,ERC2,LPAR1,IQGAP2,CLVS2,RAD51B,MYO3A,ELMO1,TTC39C,KNTC1,BRCA2,XRCC2,POLQ,CHEK1,CXADR,CFAP69,KANK1,ZNF423,KATNAL2,PAWR,WASF3,KIF5C,TTC29,PTPRD,CFAP61,MAP7,PLEKHH2,RSPH9,SLIT2,TENM1,SYT7,PAM,FM…
GO:BP	sister chromatid segregation	GO:0000819	3.02037e-22	21.5199	231	879	54	21110	CENPK,KNTC1,SMC4,KIF15,KIF11,NCAPG,NUSAP1,TOP2A,NDC80,GEN1,NUF2,KIF14,TPX2,BUB1B,KIF18A,KIF23,CENPF,CEP192,BUB1,SGO1,CENPE,TTK,KIFC1,KIF18B,RACGAP1,SMC2,NCAPG2,AURKB,RAD21,SGO2,TACC3,PRC1,KIF4A,DLGAP5,FBXO5,CHEK2,NCAPD3,CCNB1,NEK2,PTTG1,CDC6,CDC20,CDCA8,KIF2C,ESPL1,BIRC5,SPC24,NCAPD2,KMT5A,INCENP,UBE2C,NCAPH,MAD2L1,MYBL2
GO:BP	chromosome organization	GO:0051276	3.37117e-21	20.4722	634	851	88	21110	SLF1,RFC3,CENPK,BRIP1,KNTC1,BRCA2,POLQ,ZRANB3,TEX15,FANCM,EZH2,SMC4,KIF15,KIF11,NCAPG,NUSAP1,TOP2A,NDC80,GEN1,DNA2,BLM,NUF2,CENPI,KIF14,TPX2,BUB1B,KIF18A,KIF23,MND1,CDK1,CENPF,CEP192,BUB1,SGO1,CENPE,TTK,KIFC1,KIF18B,RACGAP1,SMC2,EXO1,MSH5,CENPP,GINS1,FANCD2,NCAPG2,AURKB,RAD21,HMGB2,ESCO2,SGO2,TACC3,PRC1,KIF4A,DLGAP5,FBXO5,CENPO,CHEK2,NCAPD3,OIP5,CDC45,RAD54B,CCNB1,MCM8,DMC1,DSCC1,NEK2,ATF7IP2,PTT…
GO:BP	positive regulation of cell cycle	GO:0045787	1.02832e-20	19.9879	348	875	64	21110	SLF1,EGFR,LEF1,PKP4,RAD51B,ATAD5,DTL,BRCA2,CHEK1,MTBP,WNT5A,MAP3K20,SHB,PLSCR1,RRM2,EZH2,SMC4,NCAPG,NUSAP1,NDC80,E2F7,KIF20B,GEN1,RAD51AP1,ECT2,KIF14,CDC25C,KIF23,CIT,CDK1,PLK4,STIL,PBK,RACGAP1,SMC2,CDC7,CENPJ,RAD18,NCAPG2,AURKB,RAD21,DBF4,DLGAP5,RRM1,FBXO5,CHEK2,NCAPD3,CCNB1,DBF4B,CDC6,CDCA8,ESPL1,E2F8,BIRC5,NCAPD2,INCENP,UBE2C,GPSM2,NCAPH,FAM83D,AURKA,MAD2L1,STOX1,PRKCE
GO:BP	cell cycle phase transition	GO:0044770	2.18549e-20	19.6605	560	873	82	21110	MYO16,EGFR,FBXL7,BRIP1,RAD51B,KNTC1,ATAD5,DTL,BRCA2,CHEK1,PKIA,MTBP,MAP3K20,RNASEH2B,RRM2,EZH2,MELK,NDC80,E2F7,GEN1,DNA2,BLM,NUF2,KIF14,CDC25C,ANLN,BUB1B,CIT,CDK1,CENPF,STIL,BUB1,GTSE1,CENPE,TTK,PBK,BARD1,BRCA1,RBL1,CDC7,FANCD2,CENPJ,MASTL,AURKB,RAD21,CLSPN,DBF4,TACC3,DLGAP5,WDR76,RRM1,FBXO5,CHEK2,CDC45,CCNB1,DBF4B,USP37,TICRR,BCL2,RBBP8,CDC6,E2F3,RFWD3,RAD51,ABCB1,CDC20,CDCA8,CDKN3,ESPL1,BIRC5,F…
GO:BP	meiotic cell cycle process	GO:1903046	5.95851e-20	19.2249	211	874	49	21110	BRIP1,RAD51B,BRCA2,FMN2,TEX15,FANCM,WNT5A,SMC4,ASPM,TOP2A,NDC80,RAD51AP1,NUF2,CDC25C,KIF18A,MND1,SGO1,TTK,SMC2,MSH5,FANCD2,MYBL1,MASTL,RAD21,SGO2,FANCA,FBXO5,NCAPD3,RAD54B,DMC1,C11ORF80,SYCP2L,PTTG1,RMI1,RAD51,NDC1,CDC20,RPS6KA2,ESPL1,BIRC5,NCAPD2,INCENP,NCAPH,CCNB2,AURKA,RAD54L,FBXO43,CCNA1,TDRD9
GO:BP	mitotic cell cycle phase transition	GO:0044772	1.34725e-19	18.8706	455	873	72	21110	MYO16,EGFR,FBXL7,RAD51B,KNTC1,ATAD5,DTL,CHEK1,PKIA,MTBP,RNASEH2B,RRM2,EZH2,MELK,NDC80,E2F7,GEN1,BLM,NUF2,KIF14,CDC25C,ANLN,BUB1B,CIT,CDK1,CENPF,STIL,BUB1,GTSE1,CENPE,TTK,BARD1,BRCA1,RBL1,CDC7,CENPJ,MASTL,AURKB,RAD21,CLSPN,DBF4,TACC3,DLGAP5,RRM1,FBXO5,CHEK2,CCNB1,DBF4B,USP37,TICRR,BCL2,RBBP8,CDC6,E2F3,RFWD3,ABCB1,CDC20,CDCA8,CDKN3,ESPL1,BIRC5,FOXM1,SPC24,INCENP,UBE2C,CCNB2,IQGAP3,AURKA,MAD2L1,STOX…
GO:BP	meiotic nuclear division	GO:0140013	3.35713e-19	18.474	192	874	46	21110	BRIP1,RAD51B,BRCA2,FMN2,TEX15,FANCM,WNT5A,SMC4,ASPM,TOP2A,NDC80,RAD51AP1,NUF2,KIF18A,MND1,SGO1,TTK,SMC2,MSH5,FANCD2,MYBL1,MASTL,RAD21,SGO2,FANCA,FBXO5,RAD54B,DMC1,C11ORF80,SYCP2L,PTTG1,RMI1,RAD51,NDC1,CDC20,RPS6KA2,ESPL1,BIRC5,INCENP,NCAPH,CCNB2,AURKA,RAD54L,FBXO43,CCNA1,TDRD9
GO:BP	regulation of cell cycle phase transition	GO:1901987	1.2614e-18	17.8991	435	853	68	21110	MYO16,EGFR,BRIP1,RAD51B,KNTC1,ATAD5,DTL,BRCA2,CHEK1,PKIA,MTBP,MAP3K20,RNASEH2B,RRM2,EZH2,NDC80,E2F7,GEN1,DNA2,BLM,NUF2,KIF14,CDC25C,ANLN,BUB1B,CDK1,CENPF,STIL,BUB1,GTSE1,CENPE,TTK,PBK,BARD1,BRCA1,RBL1,CDC7,FANCD2,CENPJ,AURKB,RAD21,CLSPN,DBF4,DLGAP5,WDR76,RRM1,FBXO5,CHEK2,CDC45,CCNB1,DBF4B,TICRR,BCL2,RBBP8,CDC6,RFWD3,RAD51,CDC20,CDCA8,ESPL1,BIRC5,SPC24,INCENP,UBE2C,FAM83D,AURKA,MAD2L1,STOX1
GO:BP	regulation of chromosome segregation	GO:0051983	3.23458e-18	17.4902	130	850	37	21110	KNTC1,PLSCR1,SMC4,NCAPG,MKI67,NDC80,GEN1,NUF2,BUB1B,CENPF,BUB1,CENPE,TTK,SMC2,CDCA2,RAD18,NCAPG2,AURKB,RAD21,TACC3,DLGAP5,FBXO5,NCAPD3,CCNB1,PTTG1,CDC6,CDC20,CDCA8,KIF2C,ESPL1,BIRC5,SPC24,NCAPD2,INCENP,UBE2C,NCAPH,MAD2L1
GO:BP	regulation of chromosome separation	GO:1905818	7.45447e-18	17.1276	76	850	29	21110	KNTC1,PLSCR1,SMC4,NCAPG,NDC80,GEN1,NUF2,BUB1B,CENPF,BUB1,TTK,SMC2,NCAPG2,AURKB,RAD21,DLGAP5,FBXO5,NCAPD3,CCNB1,PTTG1,CDC20,CDCA8,ESPL1,BIRC5,SPC24,NCAPD2,INCENP,NCAPH,MAD2L1
GO:BP	DNA replication	GO:0006260	1.64409e-17	16.7841	284	855	53	21110	RFC3,EGFR,MMS22L,RBMS1,ATAD5,DTL,BRCA2,POLQ,CHEK1,ZRANB3,BCAR3,ZGRF1,FANCM,RRM2,E2F7,GEN1,DNA2,BLM,CDK1,BARD1,BRCA1,PRIM2,CDC7,GINS1,WDHD1,POLE2,CHAF1A,MCM10,ESCO2,NUCKS1,POLD3,DBF4,FAM111B,PCLAF,RRM1,FBXO5,POLA2,CDC45,MGME1,MCM8,DSCC1,DBF4B,USP37,TICRR,POLA1,RBBP8,CDC6,RFWD3,RMI1,RAD51,E2F8,PIF1,CCNA2
GO:BP	regulation of mitotic cell cycle phase transition	GO:1901990	4.30174e-17	16.3664	334	853	57	21110	MYO16,EGFR,RAD51B,KNTC1,ATAD5,DTL,CHEK1,PKIA,MTBP,RNASEH2B,RRM2,EZH2,NDC80,E2F7,GEN1,BLM,NUF2,KIF14,CDC25C,ANLN,BUB1B,CDK1,CENPF,STIL,BUB1,GTSE1,CENPE,TTK,BARD1,BRCA1,RBL1,CDC7,CENPJ,AURKB,RAD21,CLSPN,DLGAP5,RRM1,FBXO5,CHEK2,CCNB1,DBF4B,TICRR,BCL2,RBBP8,CDC6,RFWD3,CDC20,CDCA8,ESPL1,BIRC5,SPC24,INCENP,UBE2C,AURKA,MAD2L1,STOX1
GO:BP	meiotic cell cycle	GO:0051321	5.21778e-17	16.2825	285	874	53	21110	BRIP1,RAD51B,BRCA2,XRCC2,FMN2,TEX15,FANCM,WNT5A,SMC4,ASPM,TOP2A,NDC80,RAD51AP1,NUF2,CDC25C,KIF18A,MND1,SGO1,TTK,SMC2,EXO1,MSH5,FANCD2,MYBL1,MASTL,RAD21,SGO2,FANCA,FBXO5,NCAPD3,RAD54B,DMC1,NEK2,C11ORF80,SYCP2L,PTTG1,RBBP8,RMI1,RAD51,NDC1,CDC20,RPS6KA2,ESPL1,BIRC5,NCAPD2,INCENP,NCAPH,CCNB2,AURKA,RAD54L,FBXO43,CCNA1,TDRD9
GO:BP	chromosome separation	GO:0051304	9.03172e-17	16.0442	82	850	29	21110	KNTC1,PLSCR1,SMC4,NCAPG,NDC80,GEN1,NUF2,BUB1B,CENPF,BUB1,TTK,SMC2,NCAPG2,AURKB,RAD21,DLGAP5,FBXO5,NCAPD3,CCNB1,PTTG1,CDC20,CDCA8,ESPL1,BIRC5,SPC24,NCAPD2,INCENP,NCAPH,MAD2L1
GO:BP	regulation of mitotic cell cycle	GO:0007346	2.59577e-16	15.5857	495	868	70	21110	MYO16,EGFR,RAD51B,KNTC1,ATAD5,DTL,BRCA2,CHEK1,PKIA,MTBP,MAP3K20,RNASEH2B,SHB,RRM2,EZH2,NUSAP1,MKI67,NDC80,E2F7,KIF20B,GEN1,BLM,NUF2,KIF14,CDC25C,ANLN,BUB1B,CDK1,CENPF,STIL,BUB1,GTSE1,CENPE,TTK,PBK,CDCA2,BARD1,BRCA1,RBL1,CDC7,FANCD2,CENPJ,AURKB,RAD21,CLSPN,DLGAP5,RRM1,FBXO5,CHEK2,CCNB1,NEK2,DBF4B,TICRR,BORA,BCL2,RBBP8,CDC6,RFWD3,CDC20,IQGAP1,CDCA8,ESPL1,BIRC5,SPC24,INCENP,UBE2C,AURKA,MAD2L1,STOX1,…
GO:BP	negative regulation of cell cycle process	GO:0010948	6.76012e-16	15.17	303	868	53	21110	MYO16,BRIP1,KNTC1,DTL,BRCA2,CHEK1,MTBP,MAP3K20,RNASEH2B,EZH2,NDC80,E2F7,GEN1,DNA2,BLM,NUF2,BUB1B,CDK1,CENPF,BUB1,GTSE1,TTK,PBK,BARD1,BRCA1,RBL1,FANCD2,AURKB,RAD21,CLSPN,WDR76,FBXO5,CHEK2,CDC45,CCNB1,NEK2,TICRR,BCL2,PTTG1,RBBP8,CDC6,RFWD3,RAD51,CDC20,RPS6KA2,CDCA8,ESPL1,E2F8,BIRC5,SPC24,INCENP,MAD2L1,FBXO43
GO:BP	DNA-templated DNA replication	GO:0006261	6.96665e-16	15.157	163	826	38	21110	RFC3,MMS22L,ATAD5,BRCA2,POLQ,ZRANB3,ZGRF1,FANCM,E2F7,GEN1,DNA2,BLM,BARD1,BRCA1,PRIM2,CDC7,GINS1,WDHD1,POLE2,MCM10,NUCKS1,POLD3,DBF4,RRM1,FBXO5,POLA2,CDC45,MGME1,MCM8,DSCC1,DBF4B,TICRR,POLA1,RBBP8,CDC6,RFWD3,RAD51,E2F8
GO:BP	microtubule cytoskeleton organization involved in mitosis	GO:1902850	1.87504e-14	13.727	169	1147	43	21110	GNAI1,CEP126,KIF15,KIF11,NUSAP1,NDC80,NUF2,TPX2,KIF23,STIL,CEP192,CKAP5,CENPE,TTK,KIFC1,RACGAP1,CENPJ,AURKB,TACC3,PRC1,KIF4A,DLGAP5,CHEK2,CCNB1,NEK2,BORA,CDC20,CDCA8,ESPL1,BIRC5,WDR62,INCENP,GPSM2,AURKA,MAD2L1,MYBL2,PLK1,MZT1,NDE1,CENPA,SPDL1,PSRC1,SAPCD2
GO:BP	cell projection organization	GO:0030030	2.58011e-14	13.5884	1573	1143	167	21110	ADGRB3,CNTN5,ROBO2,MDK,TOX,CFAP47,PDLIM5,AHI1,PTPRO,PALLD,PTPRM,MYO16,ADGRV1,TENM3,SPAG17,ANOS1,PLXNC1,EPHA6,GFRA1,TEKT1,SDK1,KIRREL3,HYDIN,PRAG1,PRTG,EPB41L3,CLRN1,CFAP54,SCLT1,CEP135,ANK3,MAP1B,LCA5,EFNA5,LRP2,BOC,RELN,LPAR1,NR2F1,LHX9,CPNE5,SEMA3D,ALCAM,MYO3A,TTC39C,FUT9,CFAP69,KANK1,ANO1,ZNF423,WASF3,KIF5C,TTC29,PTPRD,CFAP61,RSPH9,ARHGAP24,SLIT2,TENM1,SYT17,DCDC2,CEP126,DNAI1,PLXNA4,ONECUT2,C…
GO:BP	DNA metabolic process	GO:0006259	2.60602e-14	13.584	1046	878	106	21110	TOX,SLF1,RFC3,EGFR,BRIP1,MMS22L,CYP1B1,LEF1,RAD51B,RBMS1,HELLS,ATAD5,DTL,BRCA2,XRCC2,NSD2,POLQ,CHEK1,FANCB,FMN2,ZRANB3,BCAR3,TEX15,RADX,NOX4,ZGRF1,FANCM,RNASEH2B,RRM2,EZH2,TOP2A,PARPBP,E2F7,GEN1,DNA2,RAD51AP1,BLM,MND1,CDK1,CENPF,NEIL3,EXO1,MSH5,BARD1,BRCA1,PRIM2,CDC7,GINS1,FANCD2,WDHD1,RAD18,POLE2,CHAF1A,FANCI,MCM10,AURKB,RAD21,HMGB2,ESCO2,NUCKS1,CLSPN,POLD3,UBE2T,DBF4,FANCA,FAM111B,PCLAF,UHRF1,R…
GO:BP	negative regulation of cell cycle phase transition	GO:1901988	3.97738e-14	13.4004	259	850	46	21110	MYO16,BRIP1,KNTC1,DTL,BRCA2,CHEK1,MAP3K20,RNASEH2B,EZH2,NDC80,E2F7,GEN1,DNA2,BLM,NUF2,BUB1B,CDK1,CENPF,BUB1,GTSE1,TTK,PBK,BARD1,BRCA1,RBL1,FANCD2,AURKB,RAD21,CLSPN,WDR76,FBXO5,CHEK2,CDC45,CCNB1,TICRR,BCL2,RBBP8,CDC6,RFWD3,RAD51,CDC20,CDCA8,BIRC5,SPC24,INCENP,MAD2L1
GO:BP	cell cycle G2/M phase transition	GO:0044839	5.11661e-14	13.291	159	855	36	21110	FBXL7,RAD51B,ATAD5,DTL,CHEK1,PKIA,RNASEH2B,MELK,NDC80,BLM,KIF14,CDC25C,CIT,CDK1,CENPF,BARD1,BRCA1,CDC7,MASTL,AURKB,RAD21,CLSPN,RRM1,FBXO5,CHEK2,CCNB1,DBF4B,TICRR,RBBP8,CDC6,ABCB1,FOXM1,CCNB2,AURKA,STOX1,CCNA2
GO:BP	cell cycle checkpoint signaling	GO:0000075	1.24547e-13	12.9047	193	850	39	21110	BRIP1,KNTC1,DTL,BRCA2,CHEK1,MAP3K20,RNASEH2B,NDC80,GEN1,DNA2,BLM,NUF2,BUB1B,CDK1,CENPF,BUB1,GTSE1,TTK,PBK,BARD1,BRCA1,FANCD2,AURKB,CLSPN,WDR76,CHEK2,CDC45,CCNB1,TICRR,RBBP8,CDC6,RFWD3,RAD51,CDC20,CDCA8,BIRC5,SPC24,INCENP,MAD2L1
GO:BP	regulation of mitotic nuclear division	GO:0007088	1.43388e-13	12.8435	118	868	31	21110	KNTC1,CHEK1,MTBP,NUSAP1,MKI67,NDC80,KIF20B,GEN1,NUF2,CDC25C,BUB1B,CENPF,BUB1,TTK,CDCA2,AURKB,RAD21,DLGAP5,FBXO5,CCNB1,NEK2,BORA,CDC20,CDCA8,ESPL1,BIRC5,SPC24,INCENP,AURKA,MAD2L1,FBXO43
GO:BP	mitotic spindle organization	GO:0007052	1.46636e-13	12.8338	136	985	35	21110	GNAI1,CEP126,KIF15,KIF11,NDC80,NUF2,TPX2,KIF23,STIL,CEP192,CKAP5,CENPE,TTK,KIFC1,RACGAP1,CENPJ,AURKB,TACC3,PRC1,KIF4A,DLGAP5,CHEK2,CCNB1,NEK2,BORA,CDC20,CDCA8,BIRC5,WDR62,INCENP,GPSM2,AURKA,MYBL2,PLK1,MZT1
GO:BP	plasma membrane bounded cell projection organization	GO:0120036	1.51193e-13	12.8205	1535	1143	162	21110	ADGRB3,CNTN5,ROBO2,MDK,TOX,CFAP47,PDLIM5,AHI1,PTPRO,PALLD,PTPRM,MYO16,ADGRV1,TENM3,SPAG17,ANOS1,PLXNC1,EPHA6,GFRA1,TEKT1,SDK1,KIRREL3,HYDIN,PRAG1,PRTG,EPB41L3,CLRN1,CFAP54,SCLT1,CEP135,ANK3,MAP1B,LCA5,EFNA5,LRP2,BOC,RELN,LPAR1,NR2F1,LHX9,CPNE5,SEMA3D,ALCAM,MYO3A,TTC39C,FUT9,CFAP69,KANK1,ZNF423,WASF3,KIF5C,TTC29,PTPRD,CFAP61,RSPH9,ARHGAP24,SLIT2,TENM1,SYT17,DCDC2,CEP126,DNAI1,PLXNA4,ONECUT2,CFAP20…
GO:BP	regulation of nuclear division	GO:0051783	2.50496e-13	12.6012	146	868	34	21110	KNTC1,CHEK1,MTBP,WNT5A,NUSAP1,MKI67,NDC80,KIF20B,GEN1,RAD51AP1,NUF2,CDC25C,BUB1B,CENPF,BUB1,TTK,CDCA2,AURKB,RAD21,DLGAP5,FBXO5,CCNB1,NEK2,BORA,CDC20,RPS6KA2,CDCA8,ESPL1,BIRC5,SPC24,INCENP,AURKA,MAD2L1,FBXO43
GO:BP	G2/M transition of mitotic cell cycle	GO:0000086	6.10831e-13	12.2141	143	855	33	21110	FBXL7,RAD51B,DTL,CHEK1,PKIA,RNASEH2B,MELK,BLM,KIF14,CDC25C,CIT,CDK1,CENPF,BARD1,BRCA1,CDC7,MASTL,AURKB,RAD21,CLSPN,RRM1,FBXO5,CHEK2,CCNB1,DBF4B,TICRR,RBBP8,CDC6,ABCB1,FOXM1,AURKA,STOX1,CCNA2
GO:BP	DNA repair	GO:0006281	1.09412e-12	11.9609	591	787	67	21110	SLF1,RFC3,EGFR,BRIP1,MMS22L,RAD51B,DTL,BRCA2,XRCC2,NSD2,POLQ,CHEK1,FANCB,FMN2,ZRANB3,TEX15,RADX,FANCM,RNASEH2B,PARPBP,GEN1,DNA2,RAD51AP1,BLM,CDK1,NEIL3,EXO1,MSH5,BARD1,BRCA1,CDC7,FANCD2,WDHD1,RAD18,POLE2,CHAF1A,FANCI,RAD21,HMGB2,ESCO2,NUCKS1,CLSPN,POLD3,UBE2T,FANCA,PCLAF,UHRF1,RRM1,CHEK2,CDC45,DDB2,GADD45A,RAD54B,MGME1,MCM8,EYA1,TDP1,DMC1,TICRR,PTTG1,APLF,SUPT3H,POLA1,RBBP8,RFWD3,RMI1,RAD51
GO:BP	spindle organization	GO:0007051	1.11262e-12	11.9537	201	1013	42	21110	GNAI1,CEP126,TRIM36,KIF15,KIF11,ASPM,NDC80,NUF2,TPX2,KIF23,STIL,CEP192,CKAP5,CENPE,TTK,KIFC1,RACGAP1,CENPJ,AURKB,TUBB,TACC3,PRC1,KIF4A,DLGAP5,FBXO5,CHEK2,CCNB1,NEK2,BORA,CDC20,CDCA8,ESPL1,BIRC5,WDR62,INCENP,GPSM2,CCNB2,AURKA,MYBL2,PLK1,MZT1,KNSTRN
GO:BP	meiosis I cell cycle process	GO:0061982	1.87229e-12	11.7276	139	980	34	21110	BRIP1,RAD51B,BRCA2,FMN2,TEX15,FANCM,TOP2A,NDC80,RAD51AP1,CDC25C,MND1,SGO1,MSH5,FANCD2,MYBL1,RAD21,SGO2,FBXO5,RAD54B,DMC1,C11ORF80,PTTG1,RMI1,RAD51,NDC1,ESPL1,BIRC5,CCNB2,AURKA,RAD54L,CCNA1,TDRD9,SYCP2,PLK1
GO:BP	meiosis I	GO:0007127	3.17329e-12	11.4985	133	980	33	21110	BRIP1,RAD51B,BRCA2,FMN2,TEX15,FANCM,TOP2A,NDC80,RAD51AP1,MND1,SGO1,MSH5,FANCD2,MYBL1,RAD21,SGO2,FBXO5,RAD54B,DMC1,C11ORF80,PTTG1,RMI1,RAD51,NDC1,ESPL1,BIRC5,CCNB2,AURKA,RAD54L,CCNA1,TDRD9,SYCP2,PLK1
GO:BP	negative regulation of mitotic cell cycle phase transition	GO:1901991	3.40073e-12	11.4684	181	850	36	21110	MYO16,KNTC1,DTL,CHEK1,EZH2,NDC80,E2F7,GEN1,BLM,NUF2,BUB1B,CDK1,CENPF,BUB1,GTSE1,TTK,BARD1,BRCA1,RBL1,AURKB,RAD21,CLSPN,FBXO5,CHEK2,CCNB1,TICRR,BCL2,RBBP8,CDC6,RFWD3,CDC20,CDCA8,BIRC5,SPC24,INCENP,MAD2L1
GO:BP	regulation of organelle organization	GO:0033043	3.99727e-12	11.3982	1193	875	110	21110	MDK,SLF1,ARHGAP6,SYNPO2,GNAI1,ADD3,PRKAA2,CEP135,MAP1B,EFNA5,ERC2,LPAR1,IQGAP2,MYO3A,KNTC1,CHEK1,KANK1,WASF3,PTPRD,PLEKHH2,SLIT2,TENM1,PAM,MTBP,DCDC2,TRIM36,COTL1,WNT5A,JAM3,PHLDB2,SMAD3,CNTRL,SMC4,KIF15,NCAPG,NUSAP1,TOP2A,MKI67,NDC80,KIF20B,GEN1,RAD51AP1,NUF2,ECT2,TPX2,CDC25C,BUB1B,KIF18A,CIT,KIF24,CKAP2,CENPF,PLK4,STIL,SKA3,BUB1,CKAP5,CENPE,TTK,SMC2,CDCA2,BRCA1,CENPJ,NCAPG2,SYNE2,AURKB,RAD21,TA…
GO:BP	mitotic cell cycle checkpoint signaling	GO:0007093	5.79587e-12	11.2369	145	850	32	21110	KNTC1,DTL,CHEK1,MAP3K20,NDC80,GEN1,BLM,NUF2,BUB1B,CDK1,CENPF,BUB1,GTSE1,TTK,PBK,BARD1,BRCA1,FANCD2,AURKB,CLSPN,CHEK2,CCNB1,TICRR,RBBP8,CDC6,RFWD3,CDC20,CDCA8,BIRC5,SPC24,INCENP,MAD2L1
GO:BP	negative regulation of nuclear division	GO:0051784	6.61647e-12	11.1794	63	868	22	21110	KNTC1,CHEK1,MTBP,NDC80,GEN1,NUF2,BUB1B,CENPF,BUB1,TTK,AURKB,RAD21,FBXO5,CCNB1,CDC20,RPS6KA2,CDCA8,BIRC5,SPC24,INCENP,MAD2L1,FBXO43
GO:BP	negative regulation of cell cycle	GO:0045786	8.24014e-12	11.0841	387	868	54	21110	MYO16,BRIP1,NR2F2,KNTC1,DTL,BRCA2,CHEK1,MTBP,MAP3K20,RNASEH2B,EZH2,NDC80,E2F7,GEN1,DNA2,BLM,NUF2,BUB1B,CDK1,CENPF,BUB1,GTSE1,TTK,PBK,BARD1,BRCA1,RBL1,FANCD2,AURKB,RAD21,CLSPN,WDR76,FBXO5,CHEK2,CDC45,CCNB1,NEK2,TICRR,BCL2,PTTG1,RBBP8,CDC6,RFWD3,RAD51,CDC20,RPS6KA2,CDCA8,ESPL1,E2F8,BIRC5,SPC24,INCENP,MAD2L1,FBXO43
GO:BP	negative regulation of mitotic cell cycle	GO:0045930	1.27095e-11	10.8959	231	850	40	21110	MYO16,KNTC1,DTL,CHEK1,MTBP,MAP3K20,EZH2,NDC80,E2F7,GEN1,BLM,NUF2,BUB1B,CDK1,CENPF,BUB1,GTSE1,TTK,PBK,BARD1,BRCA1,RBL1,FANCD2,AURKB,RAD21,CLSPN,FBXO5,CHEK2,CCNB1,TICRR,BCL2,RBBP8,CDC6,RFWD3,CDC20,CDCA8,BIRC5,SPC24,INCENP,MAD2L1
GO:BP	regulation of mitotic sister chromatid separation	GO:0010965	2.62594e-11	10.5807	61	850	21	21110	KNTC1,NDC80,GEN1,NUF2,BUB1B,CENPF,BUB1,TTK,AURKB,RAD21,DLGAP5,FBXO5,CCNB1,PTTG1,CDC20,CDCA8,ESPL1,BIRC5,SPC24,INCENP,MAD2L1
GO:BP	neurogenesis	GO:0022008	3.43611e-11	10.4639	1705	238	58	21110	ADGRB3,CNTN5,ROBO2,MDK,AGBL4,TOX,MAN2A1,PDLIM5,HHIP,AHI1,PTPRO,MEIS1,PALLD,PTPRM,MYO16,ADGRV1,TENM3,ANOS1,PLXNC1,EPHA6,MDGA2,GFRA1,FOXN4,EGFR,SDK1,KIRREL3,PRAG1,PRTG,EPB41L3,CLRN1,SCLT1,ANK3,MAP1B,ZFHX3,LEF1,DOK5,EFNA5,LRP2,PTPRQ,BOC,RELN,OPCML,LPAR1,NR2F1,LHX9,CPNE5,SEMA3D,ALCAM,RRAS2,NR2F2,XRCC2,FUT9,SH3GL3,KANK1,ANO1,RTN1,WASF3,KIF5C
GO:BP	DNA damage response	GO:0006974	3.83386e-11	10.4164	878	787	82	21110	SLF1,RFC3,EGFR,BRIP1,MMS22L,RAD51B,ATAD5,DTL,BRCA2,XRCC2,NSD2,POLQ,CHEK1,FANCB,FMN2,ZRANB3,RPS6KA6,TEX15,SPATA18,RADX,NUAK1,FANCM,MAP3K20,RNASEH2B,TOP2A,PARPBP,E2F7,GEN1,DNA2,RAD51AP1,BLM,VRK1,CDK1,NEIL3,GTSE1,PBK,EXO1,MSH5,BARD1,BRCA1,CDC7,FANCD2,WDHD1,RAD18,POLE2,CHAF1A,FANCI,MCM10,MASTL,RAD21,HMGB2,ESCO2,NUCKS1,CLSPN,POLD3,UBE2T,FANCA,PCLAF,UHRF1,WDR76,RRM1,CHEK2,CDC45,DDB2,GADD45A,RAD54B,MGME…
GO:BP	negative regulation of mitotic sister chromatid segregation	GO:0033048	4.38126e-11	10.3584	50	1109	21	21110	KNTC1,NDC80,GEN1,NUF2,BUB1B,CENPF,BUB1,TTK,AURKB,RAD21,FBXO5,CCNB1,PTTG1,CDC20,CDCA8,BIRC5,SPC24,INCENP,MAD2L1,PLK1,SPDL1
GO:BP	negative regulation of mitotic sister chromatid separation	GO:2000816	4.38126e-11	10.3584	50	1109	21	21110	KNTC1,NDC80,GEN1,NUF2,BUB1B,CENPF,BUB1,TTK,AURKB,RAD21,FBXO5,CCNB1,PTTG1,CDC20,CDCA8,BIRC5,SPC24,INCENP,MAD2L1,PLK1,SPDL1
GO:BP	negative regulation of sister chromatid segregation	GO:0033046	4.38126e-11	10.3584	50	1109	21	21110	KNTC1,NDC80,GEN1,NUF2,BUB1B,CENPF,BUB1,TTK,AURKB,RAD21,FBXO5,CCNB1,PTTG1,CDC20,CDCA8,BIRC5,SPC24,INCENP,MAD2L1,PLK1,SPDL1
GO:BP	negative regulation of mitotic nuclear division	GO:0045839	5.02433e-11	10.2989	56	850	20	21110	KNTC1,CHEK1,MTBP,NDC80,GEN1,NUF2,BUB1B,CENPF,BUB1,TTK,AURKB,RAD21,FBXO5,CCNB1,CDC20,CDCA8,BIRC5,SPC24,INCENP,MAD2L1
GO:BP	regulation of cellular component organization	GO:0051128	6.95969e-11	10.1574	2462	1037	203	21110	ADGRB3,ROBO2,MDK,TOX,SLF1,PDLIM5,AHI1,PTPRO,TENM3,PLXNC1,ARHGAP6,SYNPO2,EGFR,GNAI1,ADD3,TBX5,PRAG1,EPB41L3,PRKAA2,CLRN1,CEP135,MAP1B,EFNA5,GPC6,RELN,ERC2,LPAR1,NR2F1,IQGAP2,CPNE5,SEMA3D,MYO3A,KNTC1,CHEK1,FUT9,SH3GL3,GPC4,KANK1,WASF3,MCTP1,PTPRD,PLEKHH2,IGFBPL1,ARHGAP24,SLIT2,TBX20,TENM1,SYT7,SYT17,PAM,MTBP,STXBP5,DCDC2,TRIM36,PLXNA4,COTL1,ACSL4,LAMA2,ATOH7,WNT5A,NEGR1,ASIC2,JAM3,PHLDB2,SMAD3,PLSC…
GO:BP	mitotic sister chromatid separation	GO:0051306	7.90593e-11	10.102	64	850	21	21110	KNTC1,NDC80,GEN1,NUF2,BUB1B,CENPF,BUB1,TTK,AURKB,RAD21,DLGAP5,FBXO5,CCNB1,PTTG1,CDC20,CDCA8,ESPL1,BIRC5,SPC24,INCENP,MAD2L1
GO:BP	generation of neurons	GO:0048699	8.37617e-11	10.077	1488	186	46	21110	ADGRB3,CNTN5,ROBO2,MDK,AGBL4,TOX,PDLIM5,HHIP,AHI1,PTPRO,MEIS1,PALLD,PTPRM,MYO16,ADGRV1,TENM3,ANOS1,PLXNC1,EPHA6,MDGA2,GFRA1,FOXN4,SDK1,KIRREL3,PRAG1,PRTG,EPB41L3,CLRN1,SCLT1,ANK3,MAP1B,ZFHX3,LEF1,DOK5,EFNA5,LRP2,PTPRQ,BOC,RELN,OPCML,LPAR1,NR2F1,LHX9,CPNE5,SEMA3D,ALCAM
GO:BP	negative regulation of chromosome separation	GO:1905819	1.12958e-10	9.94708	52	1109	21	21110	KNTC1,NDC80,GEN1,NUF2,BUB1B,CENPF,BUB1,TTK,AURKB,RAD21,FBXO5,CCNB1,PTTG1,CDC20,CDCA8,BIRC5,SPC24,INCENP,MAD2L1,PLK1,SPDL1
GO:BP	negative regulation of chromosome segregation	GO:0051985	1.12958e-10	9.94708	52	1109	21	21110	KNTC1,NDC80,GEN1,NUF2,BUB1B,CENPF,BUB1,TTK,AURKB,RAD21,FBXO5,CCNB1,PTTG1,CDC20,CDCA8,BIRC5,SPC24,INCENP,MAD2L1,PLK1,SPDL1
GO:BP	regulation of cell cycle G2/M phase transition	GO:1902749	1.1768e-10	9.9293	111	1023	29	21110	RAD51B,ATAD5,DTL,CHEK1,PKIA,RNASEH2B,BLM,KIF14,CDC25C,CDK1,CENPF,BARD1,BRCA1,CDC7,AURKB,RAD21,CLSPN,RRM1,FBXO5,CCNB1,DBF4B,TICRR,RBBP8,CDC6,AURKA,STOX1,NEK10,PLK1,CDKN2A
GO:BP	negative regulation of mitotic metaphase/anaphase transition	GO:0045841	2.22311e-10	9.65304	48	1109	20	21110	KNTC1,NDC80,GEN1,NUF2,BUB1B,CENPF,BUB1,TTK,AURKB,RAD21,FBXO5,CCNB1,CDC20,CDCA8,BIRC5,SPC24,INCENP,MAD2L1,PLK1,SPDL1
GO:BP	meiotic chromosome segregation	GO:0045132	2.24272e-10	9.64923	102	980	27	21110	BRIP1,FMN2,TEX15,FANCM,SMC4,ASPM,TOP2A,NDC80,NUF2,MND1,SGO1,TTK,SMC2,MSH5,FANCD2,SGO2,FBXO5,DMC1,PTTG1,RMI1,NDC1,ESPL1,NCAPH,CCNB2,AURKA,SYCP2,PLK1
GO:BP	regulation of G2/M transition of mitotic cell cycle	GO:0010389	2.72264e-10	9.56501	99	853	25	21110	RAD51B,DTL,CHEK1,PKIA,RNASEH2B,BLM,KIF14,CDC25C,CDK1,CENPF,BARD1,BRCA1,CDC7,AURKB,RAD21,CLSPN,RRM1,FBXO5,CCNB1,DBF4B,TICRR,RBBP8,CDC6,AURKA,STOX1
GO:BP	neuron differentiation	GO:0030182	2.8338e-10	9.54763	1415	186	44	21110	ADGRB3,CNTN5,ROBO2,MDK,AGBL4,TOX,PDLIM5,AHI1,PTPRO,MEIS1,PALLD,PTPRM,MYO16,ADGRV1,TENM3,ANOS1,PLXNC1,EPHA6,MDGA2,GFRA1,FOXN4,SDK1,KIRREL3,PRAG1,PRTG,EPB41L3,CLRN1,SCLT1,ANK3,MAP1B,ZFHX3,DOK5,EFNA5,LRP2,PTPRQ,BOC,RELN,OPCML,LPAR1,NR2F1,LHX9,CPNE5,SEMA3D,ALCAM
GO:BP	regulation of mitotic sister chromatid segregation	GO:0033047	4.25757e-10	9.37084	55	1109	21	21110	KNTC1,NDC80,GEN1,NUF2,BUB1B,CENPF,BUB1,TTK,AURKB,RAD21,FBXO5,CCNB1,PTTG1,CDC20,CDCA8,BIRC5,SPC24,INCENP,MAD2L1,PLK1,SPDL1
GO:BP	neuron development	GO:0048666	5.4631e-10	9.26256	1144	186	39	21110	ADGRB3,CNTN5,ROBO2,MDK,AGBL4,TOX,PDLIM5,AHI1,PTPRO,PALLD,PTPRM,MYO16,ADGRV1,TENM3,ANOS1,PLXNC1,EPHA6,GFRA1,SDK1,KIRREL3,PRAG1,PRTG,EPB41L3,CLRN1,SCLT1,ANK3,MAP1B,EFNA5,LRP2,PTPRQ,BOC,RELN,OPCML,LPAR1,NR2F1,LHX9,CPNE5,SEMA3D,ALCAM
GO:BP	negative regulation of metaphase/anaphase transition of cell cycle	GO:1902100	5.6612e-10	9.24709	50	1109	20	21110	KNTC1,NDC80,GEN1,NUF2,BUB1B,CENPF,BUB1,TTK,AURKB,RAD21,FBXO5,CCNB1,CDC20,CDCA8,BIRC5,SPC24,INCENP,MAD2L1,PLK1,SPDL1
GO:BP	regulation of cell cycle checkpoint	GO:1901976	5.77606e-10	9.23837	49	850	18	21110	BRCA2,MAP3K20,RNASEH2B,NDC80,GEN1,PBK,BARD1,BRCA1,AURKB,WDR76,CHEK2,CCNB1,RFWD3,RAD51,CDCA8,BIRC5,INCENP,MAD2L1
GO:BP	metaphase/anaphase transition of mitotic cell cycle	GO:0007091	6.0322e-10	9.21952	94	850	24	21110	KNTC1,NDC80,GEN1,NUF2,BUB1B,CENPF,BUB1,CENPE,TTK,AURKB,RAD21,TACC3,DLGAP5,FBXO5,CCNB1,CDC6,CDC20,CDCA8,ESPL1,BIRC5,SPC24,INCENP,UBE2C,MAD2L1
GO:BP	system development	GO:0048731	6.53709e-10	9.18462	3987	238	93	21110	ADGRB3,KIAA1217,CNTN5,ROBO2,MDK,AGBL4,SHROOM3,LGR5,TOX,DNAH11,MAN2A1,PDLIM5,HHIP,AHI1,PTPRO,MEIS1,CABLES1,PALLD,PTPRM,MYO16,ADGRV1,TENM3,ANOS1,PLXNC1,EPHA6,COL11A1,MDGA2,COL13A1,GFRA1,FOXN4,EGFR,SDK1,KIRREL3,HYDIN,TBX5,PRAG1,PRTG,EPB41L3,BRIP1,CLRN1,CALCRL,CYP1B1,FBN1,ZBTB16,SCLT1,ANK3,MAP1B,ZFHX3,LEF1,KIF26B,DOK5,CHST11,EFNA5,CPAMD8,LRP2,FBN2,PTPRQ,BOC,NRIP1,GPC6,RELN,OPCML,CPE,LPAR1,ZIC1,FRAS1,…
GO:BP	regulation of sister chromatid segregation	GO:0033045	1.07095e-09	8.97023	105	850	25	21110	KNTC1,NDC80,GEN1,NUF2,BUB1B,CENPF,BUB1,CENPE,TTK,AURKB,RAD21,TACC3,DLGAP5,FBXO5,CCNB1,PTTG1,CDC6,CDC20,CDCA8,ESPL1,BIRC5,SPC24,INCENP,UBE2C,MAD2L1
GO:BP	metaphase/anaphase transition of cell cycle	GO:0044784	1.2749e-09	8.89452	97	850	24	21110	KNTC1,NDC80,GEN1,NUF2,BUB1B,CENPF,BUB1,CENPE,TTK,AURKB,RAD21,TACC3,DLGAP5,FBXO5,CCNB1,CDC6,CDC20,CDCA8,ESPL1,BIRC5,SPC24,INCENP,UBE2C,MAD2L1
GO:BP	positive regulation of chromosome segregation	GO:0051984	1.36069e-09	8.86624	28	841	14	21110	SMC4,NCAPG,SMC2,RAD18,NCAPG2,AURKB,NCAPD3,CCNB1,CDC6,CDCA8,BIRC5,NCAPD2,INCENP,NCAPH
GO:BP	multicellular organism development	GO:0007275	1.59397e-09	8.79752	4658	242	103	21110	ADGRB3,KIAA1217,CNTN5,ROBO2,MDK,AGBL4,SHROOM3,LGR5,TOX,DNAH11,MAN2A1,PDLIM5,HHIP,AHI1,PTPRO,MEIS1,CABLES1,PALLD,PTPRM,MYO16,ADGRV1,TENM3,ADAMTS3,ANOS1,PLXNC1,EPHA6,COL11A1,MDGA2,COL13A1,GFRA1,FOXN4,EGFR,SDK1,KIRREL3,HYDIN,TBX5,PRAG1,S1PR3,PRTG,EPB41L3,BRIP1,CLRN1,CALCRL,CYP1B1,FBN1,ZBTB16,SCLT1,ANK3,MAP1B,ZFHX3,TMEM178A,LEF1,KIF26B,DOK5,CHST11,EFNA5,CPAMD8,LRP2,FBN2,PTPRQ,BOC,NRIP1,GPC6,RELN,OPCM…
GO:BP	regulation of mitotic metaphase/anaphase transition	GO:0030071	2.39814e-09	8.62013	91	850	23	21110	KNTC1,NDC80,GEN1,NUF2,BUB1B,CENPF,BUB1,CENPE,TTK,AURKB,RAD21,DLGAP5,FBXO5,CCNB1,CDC6,CDC20,CDCA8,ESPL1,BIRC5,SPC24,INCENP,UBE2C,MAD2L1
GO:BP	microtubule-based movement	GO:0007018	2.868e-09	8.54242	423	1062	59	21110	AGBL4,DNAH11,CFAP47,DNAH14,SPAG17,TEKT1,HYDIN,CFAP54,MAP1B,KIF26B,LCA5,LZTFL1,CFAP69,KIF5C,TTC29,CFAP61,RSPH9,ENKUR,FMN2,TTLL9,DNAI1,ZBBX,CFAP206,SPEF2,DNAH7,KIF15,KIF11,KIF20B,KIF14,KIF18A,KIF23,KIF24,CENPE,KIFC1,KIF18B,SYNE2,KIF4A,DLGAP5,CFAP221,CFAP43,TRAF3IP1,TUBA1A,UCHL1,SPAG16,JHY,KIF20A,ROPN1L,CCDC39,DNAH6,KIF2C,TEKT3,DNAH9,NME5,WDPCP,NEK10,CCDC40,TMEM108,ENO4,NDE1
GO:BP	nervous system development	GO:0007399	2.91142e-09	8.5359	2547	247	71	21110	ADGRB3,CNTN5,ROBO2,MDK,AGBL4,SHROOM3,TOX,DNAH11,MAN2A1,PDLIM5,HHIP,AHI1,PTPRO,MEIS1,CABLES1,PALLD,PTPRM,MYO16,ADGRV1,TENM3,ANOS1,PLXNC1,EPHA6,MDGA2,GFRA1,FOXN4,EGFR,SDK1,KIRREL3,HYDIN,PRAG1,PRTG,EPB41L3,CLRN1,CYP1B1,ZBTB16,SCLT1,ANK3,MAP1B,ZFHX3,LEF1,DOK5,EFNA5,LRP2,PTPRQ,BOC,GPC6,RELN,OPCML,LPAR1,ZIC1,NR2F1,LHX9,CPNE5,SEMA3D,ALCAM,RRAS2,NR2F2,BRCA2,XRCC2,FUT9,SH3GL3,GPC4,KANK1,ANO1,RTN1,ZNF423,W…
GO:BP	positive regulation of chromosome separation	GO:1905820	4.57881e-09	8.33925	30	841	14	21110	PLSCR1,SMC4,NCAPG,SMC2,NCAPG2,AURKB,DLGAP5,NCAPD3,CDCA8,ESPL1,BIRC5,NCAPD2,INCENP,NCAPH
GO:BP	regulation of metaphase/anaphase transition of cell cycle	GO:1902099	5.0149e-09	8.29974	94	850	23	21110	KNTC1,NDC80,GEN1,NUF2,BUB1B,CENPF,BUB1,CENPE,TTK,AURKB,RAD21,DLGAP5,FBXO5,CCNB1,CDC6,CDC20,CDCA8,ESPL1,BIRC5,SPC24,INCENP,UBE2C,MAD2L1
GO:BP	DNA recombination	GO:0006310	5.71581e-09	8.24292	327	851	44	21110	SLF1,BRIP1,MMS22L,LEF1,RAD51B,ATAD5,BRCA2,XRCC2,NSD2,POLQ,CHEK1,FANCB,ZRANB3,TEX15,RADX,FANCM,TOP2A,PARPBP,GEN1,RAD51AP1,BLM,MND1,EXO1,MSH5,BARD1,BRCA1,CDC7,FANCD2,RAD21,HMGB2,NUCKS1,CDC45,RAD54B,MCM8,DMC1,C11ORF80,SWAP70,APLF,RBBP8,RFWD3,RMI1,RAD51,PIF1,RAD54L
GO:BP	cell adhesion	GO:0007155	6.67177e-09	8.17576	1530	264	54	21110	PCDH7,CNTN5,ROBO2,MDK,PDLIM5,PTPRO,UTRN,PALLD,PTPRM,ADGRV1,TENM3,ANOS1,PLXNC1,COL13A1,ARHGAP6,EGFR,SDK1,KIRREL3,CNTN3,CTNNA3,PRTG,CYP1B1,FBN1,ZBTB16,ANK3,ZFHX3,LEF1,KIF26B,PKP4,EFNA5,CNTNAP3B,CDH6,BOC,GPC6,RELN,OPCML,CNTNAP3,PRLR,ALCAM,DSG2,FBLN7,FUT9,COL19A1,CXADR,GPC4,KANK1,ST6GAL1,PAWR,EDIL3,PTPRD,COL6A6,FREM2,ADAM19,KITLG
GO:BP	reproduction	GO:0000003	7.1261e-09	8.14715	1530	874	121	21110	ROBO2,MDK,LGR5,DNAH11,CFAP47,SPAG17,GFRA1,TEKT1,ADGB,BRIP1,CFAP54,CYP1B1,ZBTB16,LRP2,NRIP1,SLC38A1,LHX9,LZTFL1,PRLR,RAD51B,NR2F2,BRCA2,XRCC2,CXADR,CFAP69,KITLG,SLIT2,PACRG,PAM,ENKUR,FMN2,TTLL9,TEX15,DNAI1,TRIM36,CFAP206,ACSL4,FANCM,SPEF2,WNT5A,JAM3,CDKL2,SHB,CNTRL,SMC4,KNL1,ASPM,TOP2A,NDC80,E2F7,RAD51AP1,NUF2,CENPI,CDC25C,KIF18A,MND1,CDK1,PLK4,SGO1,TTK,RACGAP1,SMC2,EXO1,MSH5,FANCD2,MYBL1,MASTL,RA…
GO:BP	reproductive process	GO:0022414	1.04324e-08	7.98162	1521	874	120	21110	ROBO2,MDK,LGR5,DNAH11,CFAP47,SPAG17,GFRA1,TEKT1,ADGB,BRIP1,CFAP54,CYP1B1,ZBTB16,LRP2,NRIP1,SLC38A1,LHX9,LZTFL1,PRLR,RAD51B,NR2F2,BRCA2,XRCC2,CXADR,CFAP69,KITLG,SLIT2,PACRG,PAM,ENKUR,FMN2,TTLL9,TEX15,DNAI1,TRIM36,CFAP206,ACSL4,FANCM,SPEF2,WNT5A,JAM3,CDKL2,SHB,CNTRL,SMC4,KNL1,ASPM,TOP2A,NDC80,E2F7,RAD51AP1,NUF2,CENPI,CDC25C,KIF18A,MND1,CDK1,PLK4,SGO1,TTK,RACGAP1,SMC2,EXO1,MSH5,FANCD2,MYBL1,MASTL,RA…
GO:BP	homologous recombination	GO:0035825	1.39815e-08	7.85444	65	851	19	21110	BRIP1,RAD51B,FANCM,TOP2A,RAD51AP1,MND1,MSH5,BARD1,BRCA1,FANCD2,RAD21,NUCKS1,RAD54B,DMC1,C11ORF80,RBBP8,RMI1,RAD51,RAD54L
GO:BP	spindle assembly checkpoint signaling	GO:0071173	1.4087e-08	7.85118	46	1109	18	21110	KNTC1,NDC80,GEN1,NUF2,BUB1B,CENPF,BUB1,TTK,AURKB,CCNB1,CDC20,CDCA8,BIRC5,SPC24,INCENP,MAD2L1,PLK1,SPDL1
GO:BP	mitotic spindle assembly checkpoint signaling	GO:0007094	1.4087e-08	7.85118	46	1109	18	21110	KNTC1,NDC80,GEN1,NUF2,BUB1B,CENPF,BUB1,TTK,AURKB,CCNB1,CDC20,CDCA8,BIRC5,SPC24,INCENP,MAD2L1,PLK1,SPDL1
GO:BP	mitotic spindle checkpoint signaling	GO:0071174	1.4087e-08	7.85118	46	1109	18	21110	KNTC1,NDC80,GEN1,NUF2,BUB1B,CENPF,BUB1,TTK,AURKB,CCNB1,CDC20,CDCA8,BIRC5,SPC24,INCENP,MAD2L1,PLK1,SPDL1
GO:BP	cilium organization	GO:0044782	1.41532e-08	7.84915	403	1065	56	21110	CFAP47,AHI1,SPAG17,TEKT1,HYDIN,CFAP54,SCLT1,CEP135,LCA5,TTC39C,CFAP69,ZNF423,TTC29,CFAP61,RSPH9,DCDC2,CEP126,DNAI1,ONECUT2,CFAP206,SPEF2,ONECUT1,DNAH7,KIF24,PLK4,CENPJ,RTTN,SYNE2,KIAA0586,CFAP221,PTPDC1,CEP78,CFAP43,TRAF3IP1,ABCC4,CFAP74,ODF2,DCX,DNAAF3,SPAG16,IQUB,DISC1,JHY,CCDC39,TBC1D31,AURKA,POC1A,TEKT3,RAB23,NME5,WDPCP,CCDC40,PARVA,HYLS1,ENO4,ARL13B
GO:BP	centrosome cycle	GO:0007098	1.62265e-08	7.78977	137	1062	30	21110	CEP135,BRCA2,XRCC2,CHEK1,KIF11,NDC80,GEN1,CDK1,PLK4,STIL,CEP192,SGO1,CKAP5,BRCA1,CEP152,CENPJ,RTTN,PCLAF,DEUP1,GADD45A,ODF2,TUBA1A,NEK2,WDR62,AURKA,CEP295,CCNF,PLK1,CEP76,NDE1
GO:BP	neuron projection development	GO:0031175	1.9995e-08	7.69908	990	186	34	21110	ADGRB3,CNTN5,ROBO2,MDK,TOX,PDLIM5,PTPRO,PALLD,PTPRM,MYO16,ADGRV1,TENM3,ANOS1,PLXNC1,EPHA6,GFRA1,SDK1,KIRREL3,PRAG1,PRTG,EPB41L3,CLRN1,ANK3,MAP1B,EFNA5,LRP2,BOC,RELN,LPAR1,NR2F1,LHX9,CPNE5,SEMA3D,ALCAM
GO:BP	spindle checkpoint signaling	GO:0031577	2.17152e-08	7.66324	47	1109	18	21110	KNTC1,NDC80,GEN1,NUF2,BUB1B,CENPF,BUB1,TTK,AURKB,CCNB1,CDC20,CDCA8,BIRC5,SPC24,INCENP,MAD2L1,PLK1,SPDL1
GO:BP	double-strand break repair	GO:0006302	2.18106e-08	7.66133	301	851	41	21110	SLF1,BRIP1,MMS22L,RAD51B,BRCA2,XRCC2,NSD2,POLQ,CHEK1,FANCB,FMN2,TEX15,RADX,FANCM,PARPBP,GEN1,DNA2,RAD51AP1,BLM,BRCA1,CDC7,FANCD2,RAD21,HMGB2,ESCO2,NUCKS1,CHEK2,CDC45,RAD54B,MCM8,EYA1,TDP1,DMC1,APLF,POLA1,RBBP8,RFWD3,RMI1,RAD51,FOXM1,RAD54L
GO:BP	sexual reproduction	GO:0019953	2.2772e-08	7.6426	1058	899	94	21110	MDK,LGR5,CFAP47,SPAG17,ADGB,BRIP1,CFAP54,ZBTB16,NRIP1,LZTFL1,RAD51B,NR2F2,BRCA2,XRCC2,CXADR,CFAP69,PACRG,FMN2,TEX15,TRIM36,CFAP206,FANCM,SPEF2,WNT5A,JAM3,SHB,CNTRL,SMC4,KNL1,ASPM,TOP2A,NDC80,RAD51AP1,NUF2,CDC25C,KIF18A,MND1,CDK1,SGO1,TTK,RACGAP1,SMC2,EXO1,MSH5,FANCD2,MYBL1,MASTL,RAD21,HMGB2,SGO2,FANCA,FBXO5,NCAPD3,CFAP221,CFAP43,RAD54B,ODF2,MCM8,UCHL1,DMC1,NEK2,TSGA10,C11ORF80,CLIC4,SPAG16,RIMS1,…
GO:BP	organelle assembly	GO:0070925	2.47815e-08	7.60587	963	989	94	21110	CFAP47,AHI1,SPAG17,TEKT1,SYNPO2,HYDIN,CENPK,PRKAA2,CFAP54,SCLT1,CEP135,CDS1,TTC39C,KNTC1,CFAP69,ZNF423,PTPRD,RSPH9,SYT7,DCDC2,CEP126,DNAI1,ONECUT2,CFAP206,SPEF2,ONECUT1,DNAH7,KIF15,KIF11,KNL1,ASPM,NDC80,TPX2,ANLN,KIF23,KIF24,CENPF,PLK4,STIL,CEP192,CENPE,KIFC1,RACGAP1,BRCA1,CEP152,CENPJ,RTTN,SYNE2,AURKB,TUBB,PRC1,KIF4A,DLGAP5,FBXO5,CHEK2,KIAA0586,CFAP221,PTPDC1,DEUP1,CFAP43,TRAF3IP1,ABCC4,CFAP74,O…
GO:BP	spindle assembly	GO:0051225	2.58721e-08	7.58717	131	985	28	21110	KIF15,KIF11,ASPM,NDC80,TPX2,KIF23,STIL,CEP192,KIFC1,RACGAP1,CENPJ,AURKB,TUBB,PRC1,KIF4A,FBXO5,CHEK2,NEK2,CDC20,CDCA8,BIRC5,INCENP,GPSM2,CCNB2,AURKA,MYBL2,PLK1,MZT1
GO:BP	regulation of chromosome organization	GO:0033044	2.66384e-08	7.57449	253	850	37	21110	SLF1,KNTC1,SMC4,NCAPG,TOP2A,NDC80,GEN1,NUF2,BUB1B,CENPF,BUB1,CENPE,TTK,SMC2,NCAPG2,AURKB,RAD21,TACC3,DLGAP5,FBXO5,NCAPD3,CCNB1,NEK2,ATF7IP2,PTTG1,CDC6,CDC20,CDCA8,ESPL1,BIRC5,SPC24,NCAPD2,INCENP,UBE2C,NCAPH,PIF1,MAD2L1
GO:BP	anatomical structure morphogenesis	GO:0009653	2.97734e-08	7.52617	2712	162	54	21110	ADGRB3,CNTN5,ROBO2,MDK,SHROOM3,LGR5,DNAH11,MAN2A1,PDLIM5,HHIP,AHI1,PTPRO,MEIS1,COL9A1,PALLD,PTPRM,MYO16,TENM3,ANOS1,PLXNC1,EPHA6,COL11A1,COL13A1,FOXN4,EGFR,SDK1,KIRREL3,TBX5,PRAG1,S1PR3,PRTG,EPB41L3,CLRN1,CALCRL,CYP1B1,FBN1,ZBTB16,ANK3,MAP1B,LEF1,KIF26B,CHST11,EFNA5,LRP2,FBN2,PTPRQ,CDH6,BOC,GPC6,RELN,CPE,LPAR1,ZIC1,FRAS1
GO:BP	cell morphogenesis	GO:0000902	4.51559e-08	7.34529	978	1277	113	21110	ADGRB3,CNTN5,ROBO2,MDK,SHROOM3,PDLIM5,PTPRO,PALLD,PTPRM,MYO16,ANOS1,PLXNC1,EPHA6,EGFR,KIRREL3,PRAG1,PRTG,EPB41L3,CLRN1,ANK3,MAP1B,LEF1,EFNA5,LRP2,PTPRQ,CDH6,BOC,RELN,LPAR1,LHX9,CPNE5,SEMA3D,ALCAM,KANK1,ANO1,WASF3,KIF5C,PTPRD,SPARC,SLIT2,SYT17,DCDC2,NOX4,PLXNA4,LAMA2,ATOH7,WNT5A,NRK,KIF20B,ECT2,LGR6,CTNND2,SDC2,KIAA0319,DCX,CDH12,PPFIA2,ROBO1,GAP43,TUBB3,TUBA1A,UCHL1,CLIC4,LAMC3,DRAXIN,RIMS1,DISC1…
GO:BP	negative regulation of chromosome organization	GO:2001251	7.66767e-08	7.11534	97	850	22	21110	KNTC1,TOP2A,NDC80,GEN1,NUF2,BUB1B,CENPF,BUB1,TTK,AURKB,RAD21,FBXO5,CCNB1,PTTG1,CDC20,CDCA8,ESPL1,BIRC5,SPC24,INCENP,PIF1,MAD2L1
GO:BP	cell development	GO:0048468	1.15445e-07	6.93763	2763	169	55	21110	ADGRB3,CNTN5,ROBO2,MDK,AGBL4,SHROOM3,LGR5,TOX,MAN2A1,CFAP47,PDLIM5,AHI1,PTPRO,MEIS1,PALLD,PTPRM,MYO16,ADGRV1,TENM3,SPAG17,ANOS1,PLXNC1,EPHA6,COL11A1,GFRA1,SDK1,KIRREL3,HYDIN,TBX5,PRAG1,S1PR3,PRTG,EPB41L3,BRIP1,CLRN1,CFAP54,FBN1,ZBTB16,SCLT1,ANK3,MAP1B,TMEM178A,LEF1,CHST11,EFNA5,LRP2,PTPRQ,BOC,RELN,OPCML,LPAR1,PDE4D,NR2F1,LHX9,CAMK4
GO:BP	attachment of spindle microtubules to kinetochore	GO:0008608	1.65849e-07	6.78029	44	838	15	21110	KNL1,NDC80,NUF2,ECT2,SGO1,CENPE,RACGAP1,AURKB,CCNB1,NEK2,CDCA8,KIF2C,BIRC5,SPC24,INCENP
GO:BP	microtubule organizing center organization	GO:0031023	1.80639e-07	6.74319	150	1062	30	21110	CEP135,BRCA2,XRCC2,CHEK1,KIF11,NDC80,GEN1,CDK1,PLK4,STIL,CEP192,SGO1,CKAP5,BRCA1,CEP152,CENPJ,RTTN,PCLAF,DEUP1,GADD45A,ODF2,TUBA1A,NEK2,WDR62,AURKA,CEP295,CCNF,PLK1,CEP76,NDE1
GO:BP	cytokinesis	GO:0000910	4.40442e-07	6.35611	192	1133	35	21110	DCDC1,ANK3,PKP4,BRCA2,FMN2,TRIM36,NUSAP1,E2F7,KIF20B,ECT2,KIF14,ANLN,KIF23,CIT,CKAP2,PLK4,RACGAP1,AURKB,PRC1,KIF4A,KIF20A,CDC6,CDCA8,CEP55,ESPL1,E2F8,BIRC5,INCENP,AURKA,PRKCE,SPTBN1,PLK1,CENPA,SNX18,RAB11FIP4
GO:BP	positive regulation of cell cycle phase transition	GO:1901989	4.43084e-07	6.35351	115	853	23	21110	EGFR,RAD51B,ATAD5,DTL,MTBP,RRM2,EZH2,CDC25C,CDK1,STIL,CDC7,CENPJ,DLGAP5,RRM1,FBXO5,CHEK2,CCNB1,DBF4B,CDC6,ESPL1,UBE2C,FAM83D,STOX1
GO:BP	mitotic cytokinesis	GO:0000281	4.60129e-07	6.33712	89	1131	23	21110	DCDC1,ANK3,TRIM36,NUSAP1,KIF20B,ECT2,ANLN,KIF23,CIT,CKAP2,RACGAP1,AURKB,KIF4A,KIF20A,CDCA8,CEP55,ESPL1,BIRC5,INCENP,SPTBN1,PLK1,CENPA,SNX18
GO:BP	regulation of cytokinesis	GO:0032465	4.95589e-07	6.30488	94	875	21	21110	DCDC1,PKP4,BRCA2,E2F7,KIF20B,ECT2,KIF14,KIF23,CIT,PLK4,RACGAP1,AURKB,PRC1,KIF20A,CDC6,CDCA8,E2F8,BIRC5,INCENP,AURKA,PRKCE
GO:BP	epithelial cilium movement involved in extracellular fluid movement	GO:0003351	5.5294e-07	6.25732	42	1145	16	21110	DNAH11,SPAG17,CFAP54,DNAI1,SPEF2,CFAP221,CFAP43,SPAG16,JHY,ROPN1L,CCDC39,DNAH9,NME5,NEK10,CCDC40,SPA17
GO:BP	double-strand break repair via homologous recombination	GO:0000724	6.29759e-07	6.20083	172	787	27	21110	SLF1,MMS22L,RAD51B,BRCA2,XRCC2,POLQ,CHEK1,FANCB,TEX15,RADX,FANCM,PARPBP,GEN1,RAD51AP1,BLM,BRCA1,CDC7,RAD21,NUCKS1,CDC45,RAD54B,MCM8,DMC1,RBBP8,RFWD3,RMI1,RAD51
GO:BP	plasma membrane bounded cell projection assembly	GO:0120031	8.13995e-07	6.08938	577	1009	64	21110	CFAP47,AHI1,PTPRO,SPAG17,TEKT1,HYDIN,CLRN1,CFAP54,SCLT1,CEP135,LPAR1,MYO3A,TTC39C,CFAP69,KANK1,ZNF423,WASF3,RSPH9,ARHGAP24,SLIT2,TENM1,DCDC2,CEP126,DNAI1,ONECUT2,CFAP206,SPEF2,ONECUT1,DNAH7,ANLN,KIF24,PLK4,CENPJ,SYNE2,KIAA0586,CFAP221,PTPDC1,CFAP43,TRAF3IP1,ABCC4,CARMIL1,CFAP74,ODF2,DCX,GAP43,DNAAF3,PLPPR5,SPAG16,IQUB,DISC1,PPP1R16B,JHY,STK26,CCDC39,TBC1D31,POC1A,TEKT3,RAB23,NME5,WDPCP,FMNL3,CCDC…
GO:BP	spindle elongation	GO:0051231	9.81993e-07	6.00789	14	838	9	21110	KIF11,KIF23,RACGAP1,AURKB,PRC1,KIF4A,CDCA8,BIRC5,INCENP
GO:BP	recombinational repair	GO:0000725	1.07111e-06	5.97016	176	787	27	21110	SLF1,MMS22L,RAD51B,BRCA2,XRCC2,POLQ,CHEK1,FANCB,TEX15,RADX,FANCM,PARPBP,GEN1,RAD51AP1,BLM,BRCA1,CDC7,RAD21,NUCKS1,CDC45,RAD54B,MCM8,DMC1,RBBP8,RFWD3,RMI1,RAD51
GO:BP	cilium assembly	GO:0060271	1.193e-06	5.92336	374	1009	48	21110	CFAP47,AHI1,SPAG17,TEKT1,HYDIN,CFAP54,SCLT1,CEP135,TTC39C,CFAP69,ZNF423,RSPH9,DCDC2,CEP126,DNAI1,ONECUT2,CFAP206,SPEF2,ONECUT1,DNAH7,KIF24,PLK4,CENPJ,SYNE2,KIAA0586,CFAP221,PTPDC1,CFAP43,TRAF3IP1,ABCC4,CFAP74,ODF2,DCX,DNAAF3,SPAG16,IQUB,DISC1,JHY,CCDC39,TBC1D31,POC1A,TEKT3,RAB23,NME5,WDPCP,CCDC40,PARVA,HYLS1
GO:BP	cell cycle DNA replication	GO:0044786	1.20463e-06	5.91915	43	826	14	21110	ATAD5,BRCA2,E2F7,DNA2,BLM,CDC7,GINS1,DBF4,FBXO5,CDC45,DBF4B,POLA1,RAD51,E2F8
GO:BP	negative regulation of organelle organization	GO:0010639	1.72952e-06	5.76207	367	868	43	21110	ARHGAP6,ADD3,MAP1B,KNTC1,CHEK1,KANK1,PLEKHH2,SLIT2,MTBP,PHLDB2,TOP2A,NDC80,GEN1,NUF2,TPX2,BUB1B,KIF24,CKAP2,CENPF,BUB1,TTK,BRCA1,AURKB,RAD21,FBXO5,CARMIL1,CCNB1,STMN2,KANK4,TMSB10,SNCA,SWAP70,PTTG1,CDC20,RPS6KA2,CDCA8,ESPL1,BIRC5,SPC24,INCENP,PIF1,MAD2L1,FBXO43
GO:BP	cell projection assembly	GO:0030031	1.76497e-06	5.75326	588	1009	64	21110	CFAP47,AHI1,PTPRO,SPAG17,TEKT1,HYDIN,CLRN1,CFAP54,SCLT1,CEP135,LPAR1,MYO3A,TTC39C,CFAP69,KANK1,ZNF423,WASF3,RSPH9,ARHGAP24,SLIT2,TENM1,DCDC2,CEP126,DNAI1,ONECUT2,CFAP206,SPEF2,ONECUT1,DNAH7,ANLN,KIF24,PLK4,CENPJ,SYNE2,KIAA0586,CFAP221,PTPDC1,CFAP43,TRAF3IP1,ABCC4,CARMIL1,CFAP74,ODF2,DCX,GAP43,DNAAF3,PLPPR5,SPAG16,IQUB,DISC1,PPP1R16B,JHY,STK26,CCDC39,TBC1D31,POC1A,TEKT3,RAB23,NME5,WDPCP,FMNL3,CCDC…
GO:BP	mitotic chromosome condensation	GO:0007076	1.78035e-06	5.7495	19	1168	11	21110	SMC4,NCAPG,NUSAP1,SMC2,NCAPD3,NCAPD2,KMT5A,NCAPH,PLK1,TTN,CDCA5
GO:BP	DNA-templated DNA replication maintenance of fidelity	GO:0045005	1.82466e-06	5.73882	54	787	15	21110	MMS22L,BRCA2,ZRANB3,ZGRF1,FANCM,GEN1,DNA2,BLM,BARD1,BRCA1,NUCKS1,MCM8,RBBP8,RFWD3,RAD51
GO:BP	extracellular transport	GO:0006858	1.84008e-06	5.73516	45	1145	16	21110	DNAH11,SPAG17,CFAP54,DNAI1,SPEF2,CFAP221,CFAP43,SPAG16,JHY,ROPN1L,CCDC39,DNAH9,NME5,NEK10,CCDC40,SPA17
GO:BP	mitotic spindle midzone assembly	GO:0051256	2.21383e-06	5.65486	11	838	8	21110	KIF23,RACGAP1,AURKB,PRC1,KIF4A,CDCA8,BIRC5,INCENP
GO:BP	replication fork processing	GO:0031297	2.43198e-06	5.61404	47	787	14	21110	MMS22L,BRCA2,ZRANB3,ZGRF1,FANCM,GEN1,DNA2,BLM,BARD1,BRCA1,NUCKS1,RBBP8,RFWD3,RAD51
GO:BP	regulation of microtubule-based process	GO:0032886	2.60379e-06	5.58439	258	980	37	21110	DNAH11,GNAI1,PRKAA2,MAP1B,EFNA5,CFAP69,TRIM36,CFAP206,PHLDB2,KIF15,GEN1,TPX2,KIF18A,CKAP2,PLK4,STIL,SKA3,CKAP5,BRCA1,CENPJ,TACC3,SKA2,CFAP43,TRAF3IP1,STMN2,SNCA,BORA,RASSF8,CCDC39,WDR62,GPSM2,AURKA,CEP295,SKA1,CCNF,CCDC40,PLK1
GO:BP	regulation of cytoskeleton organization	GO:0051493	2.62139e-06	5.58147	543	1002	60	21110	MDK,ARHGAP6,SYNPO2,GNAI1,ADD3,PRKAA2,MAP1B,EFNA5,LPAR1,IQGAP2,MYO3A,KANK1,WASF3,PLEKHH2,SLIT2,TENM1,PAM,TRIM36,COTL1,JAM3,PHLDB2,SMAD3,CNTRL,KIF15,ECT2,TPX2,KIF18A,CIT,CKAP2,PLK4,STIL,SKA3,CKAP5,BRCA1,CENPJ,TACC3,SKA2,TRAF3IP1,CARMIL1,PPM1E,STMN2,KANK4,TMSB10,SNCA,CLIC4,BORA,SWAP70,RASSF8,IQGAP1,GPSM2,IQGAP3,PRKCE,BAIAP2L1,CEP295,SPTBN1,SKA1,CCNF,PLK1,NEXN,RND3
GO:BP	positive regulation of chromosome condensation	GO:1905821	3.00234e-06	5.52254	8	841	7	21110	SMC4,NCAPG,SMC2,NCAPG2,NCAPD3,NCAPD2,NCAPH
GO:BP	cell projection morphogenesis	GO:0048858	3.07093e-06	5.51273	671	186	25	21110	ADGRB3,CNTN5,ROBO2,MDK,PDLIM5,PTPRO,PALLD,PTPRM,MYO16,ANOS1,PLXNC1,EPHA6,KIRREL3,PRTG,EPB41L3,ANK3,MAP1B,EFNA5,LRP2,BOC,RELN,LHX9,CPNE5,SEMA3D,ALCAM
GO:BP	mitotic spindle assembly	GO:0090307	3.30675e-06	5.4806	76	985	19	21110	KIF15,KIF11,TPX2,KIF23,CEP192,KIFC1,RACGAP1,AURKB,PRC1,KIF4A,CHEK2,NEK2,CDC20,CDCA8,BIRC5,INCENP,MYBL2,PLK1,MZT1
GO:BP	axon guidance	GO:0007411	3.74933e-06	5.42605	249	389	22	21110	CNTN5,ROBO2,PTPRO,PALLD,PTPRM,ANOS1,PLXNC1,EPHA6,PRTG,EFNA5,BOC,RELN,LHX9,SEMA3D,ALCAM,KIF5C,PTPRD,SLIT2,PLXNA4,LAMA2,ATOH7,WNT5A
GO:BP	neuron projection guidance	GO:0097485	4.04256e-06	5.39334	250	389	22	21110	CNTN5,ROBO2,PTPRO,PALLD,PTPRM,ANOS1,PLXNC1,EPHA6,PRTG,EFNA5,BOC,RELN,LHX9,SEMA3D,ALCAM,KIF5C,PTPRD,SLIT2,PLXNA4,LAMA2,ATOH7,WNT5A
GO:BP	anatomical structure development	GO:0048856	4.35025e-06	5.36149	5896	242	111	21110	ADGRB3,KIAA1217,CNTN5,ROBO2,MDK,AGBL4,SHROOM3,LGR5,TOX,DNAH11,MAN2A1,CFAP47,PDLIM5,HHIP,AHI1,PTPRO,MEIS1,CABLES1,UTRN,COL9A1,PALLD,PTPRM,MYO16,ADGRV1,TENM3,ADAMTS3,SPAG17,ANOS1,PLXNC1,EPHA6,COL11A1,MDGA2,COL13A1,GFRA1,FOXN4,EGFR,SDK1,KIRREL3,HYDIN,TBX5,PRAG1,S1PR3,PRTG,EPB41L3,BRIP1,CLRN1,CFAP54,CALCRL,CYP1B1,FBN1,ZBTB16,SCLT1,ANK3,MAP1B,ZFHX3,TMEM178A,LEF1,KIF26B,DOK5,CHST11,EFNA5,CPAMD8,LRP2,FB…
GO:BP	cell differentiation	GO:0030154	5.12829e-06	5.29003	4318	171	69	21110	ADGRB3,CNTN5,ROBO2,MDK,AGBL4,SHROOM3,LGR5,TOX,MAN2A1,CFAP47,PDLIM5,NHSL1,HHIP,AHI1,PTPRO,MEIS1,PALLD,PTPRM,MYO16,ADGRV1,TENM3,SPAG17,ANOS1,PLXNC1,EPHA6,COL11A1,MDGA2,COL13A1,GFRA1,FOXN4,ADGB,EGFR,SDK1,KIRREL3,HYDIN,TBX5,PRAG1,S1PR3,PRTG,EPB41L3,BRIP1,CLRN1,CFAP54,FBN1,ZBTB16,SCLT1,ANK3,MAP1B,CDS1,ZFHX3,TMEM178A,LEF1,DOK5,CHST11,EFNA5,LRP2,FBN2,PTPRQ,BOC,RELN,OPCML,DAPL1,LPAR1,ZIC1,PDE4D,NR2F1,LHX…
GO:BP	cell part morphogenesis	GO:0032990	5.5787e-06	5.25347	691	186	25	21110	ADGRB3,CNTN5,ROBO2,MDK,PDLIM5,PTPRO,PALLD,PTPRM,MYO16,ANOS1,PLXNC1,EPHA6,KIRREL3,PRTG,EPB41L3,ANK3,MAP1B,EFNA5,LRP2,BOC,RELN,LHX9,CPNE5,SEMA3D,ALCAM
GO:BP	mitotic spindle elongation	GO:0000022	6.40957e-06	5.19317	12	838	8	21110	KIF23,RACGAP1,AURKB,PRC1,KIF4A,CDCA8,BIRC5,INCENP
GO:BP	cellular developmental process	GO:0048869	6.67325e-06	5.17566	4344	171	69	21110	ADGRB3,CNTN5,ROBO2,MDK,AGBL4,SHROOM3,LGR5,TOX,MAN2A1,CFAP47,PDLIM5,NHSL1,HHIP,AHI1,PTPRO,MEIS1,PALLD,PTPRM,MYO16,ADGRV1,TENM3,SPAG17,ANOS1,PLXNC1,EPHA6,COL11A1,MDGA2,COL13A1,GFRA1,FOXN4,ADGB,EGFR,SDK1,KIRREL3,HYDIN,TBX5,PRAG1,S1PR3,PRTG,EPB41L3,BRIP1,CLRN1,CFAP54,FBN1,ZBTB16,SCLT1,ANK3,MAP1B,CDS1,ZFHX3,TMEM178A,LEF1,DOK5,CHST11,EFNA5,LRP2,FBN2,PTPRQ,BOC,RELN,OPCML,DAPL1,LPAR1,ZIC1,PDE4D,NR2F1,LHX…
GO:BP	positive regulation of mitotic cell cycle	GO:0045931	7.32426e-06	5.13524	121	853	22	21110	EGFR,RAD51B,DTL,BRCA2,MTBP,SHB,RRM2,CDC25C,CDK1,STIL,CDC7,CENPJ,DLGAP5,RRM1,FBXO5,CCNB1,DBF4B,CDC6,ESPL1,UBE2C,AURKA,STOX1
GO:BP	cellular process involved in reproduction in multicellular organism	GO:0022412	7.88276e-06	5.10332	448	948	50	21110	ROBO2,MDK,LGR5,CFAP47,SPAG17,BRIP1,CFAP54,ZBTB16,BRCA2,CXADR,CFAP69,SLIT2,PACRG,FMN2,TEX15,CFAP206,SPEF2,JAM3,SHB,CNTRL,KNL1,ASPM,TOP2A,NDC80,KIF18A,TTK,MYBL1,MASTL,HMGB2,FANCA,FBXO5,CFAP221,CFAP43,ODF2,UCHL1,DMC1,SPAG16,BCL2,MAST2,PYGO1,ROPN1L,RPS6KA2,NCAPH,CCNB2,AURKA,CCNA1,TDRD9,TAF4B,NME5,SYCP2
GO:BP	positive regulation of mitotic cell cycle phase transition	GO:1901992	7.95772e-06	5.09921	91	853	19	21110	EGFR,RAD51B,DTL,MTBP,RRM2,CDC25C,CDK1,STIL,CDC7,CENPJ,DLGAP5,RRM1,FBXO5,CCNB1,DBF4B,CDC6,ESPL1,UBE2C,STOX1
GO:BP	neuron projection morphogenesis	GO:0048812	8.09739e-06	5.09165	650	186	24	21110	ADGRB3,CNTN5,ROBO2,PDLIM5,PTPRO,PALLD,PTPRM,MYO16,ANOS1,PLXNC1,EPHA6,KIRREL3,PRTG,EPB41L3,ANK3,MAP1B,EFNA5,LRP2,BOC,RELN,LHX9,CPNE5,SEMA3D,ALCAM
GO:BP	kinetochore organization	GO:0051383	1.13991e-05	4.94313	24	547	9	21110	CENPK,KNTC1,SMC4,NDC80,NUF2,CENPF,CENPE,SMC2,DLGAP5
GO:BP	synapse organization	GO:0050808	1.2813e-05	4.89235	474	1261	62	21110	ADGRB3,CNTN5,ROBO2,PDLIM5,PTPRO,PLXNC1,FRRS1L,SDK1,KIRREL3,ANK3,MAP1B,EFNA5,CDH6,GPC6,RELN,ERC2,CACNB2,GPC4,WASF3,PTPRD,PLXNA4,WNT5A,NEGR1,ASIC2,TUBB,SLC8A3,LRFN5,CTNND2,ERBB4,PPFIA2,GAP43,TUBA1A,SNCG,CNKSR2,SNCA,INA,DISC1,CDH10,SHISA6,CAP2,CDC20,FLRT2,MUSK,SLIT1,LRRTM3,DKK1,TMEM108,TLR2,GABRA2,KY,MDGA1,ST8SIA2,HOMER1,CHRNA7,NRG3,ABHD17B,PCLO,KIF1A,POU4F1,DNM3,COL4A5,GLRB
GO:BP	plasma membrane bounded cell projection morphogenesis	GO:0120039	1.29981e-05	4.88612	666	186	24	21110	ADGRB3,CNTN5,ROBO2,PDLIM5,PTPRO,PALLD,PTPRM,MYO16,ANOS1,PLXNC1,EPHA6,KIRREL3,PRTG,EPB41L3,ANK3,MAP1B,EFNA5,LRP2,BOC,RELN,LHX9,CPNE5,SEMA3D,ALCAM
GO:BP	centromere complex assembly	GO:0034508	1.54427e-05	4.81128	29	834	11	21110	CENPK,KNTC1,CENPI,CENPF,CENPE,CENPP,DLGAP5,CENPO,OIP5,HJURP,CENPN
GO:BP	reciprocal meiotic recombination	GO:0007131	1.5706e-05	4.80393	58	851	15	21110	BRIP1,RAD51B,FANCM,TOP2A,RAD51AP1,MND1,MSH5,FANCD2,RAD21,RAD54B,DMC1,C11ORF80,RMI1,RAD51,RAD54L
GO:BP	reciprocal homologous recombination	GO:0140527	1.5706e-05	4.80393	58	851	15	21110	BRIP1,RAD51B,FANCM,TOP2A,RAD51AP1,MND1,MSH5,FANCD2,RAD21,RAD54B,DMC1,C11ORF80,RMI1,RAD51,RAD54L
GO:BP	animal organ morphogenesis	GO:0009887	1.58266e-05	4.80061	1076	167	29	21110	ROBO2,MDK,DNAH11,MAN2A1,HHIP,AHI1,MEIS1,COL9A1,PTPRM,TENM3,COL11A1,COL13A1,FOXN4,EGFR,SDK1,TBX5,CLRN1,FBN1,LEF1,KIF26B,CHST11,LRP2,FBN2,PTPRQ,GPC6,CPE,ZIC1,FRAS1,LHX9
GO:BP	DNA integrity checkpoint signaling	GO:0031570	1.61649e-05	4.79143	136	787	22	21110	BRIP1,DTL,BRCA2,CHEK1,MAP3K20,RNASEH2B,DNA2,BLM,CDK1,GTSE1,PBK,BARD1,BRCA1,FANCD2,CLSPN,WDR76,CHEK2,CDC45,TICRR,CDC6,RFWD3,RAD51
GO:BP	cell junction organization	GO:0034330	1.71649e-05	4.76536	740	1271	85	21110	ADGRB3,CNTN5,ROBO2,PDLIM5,PTPRO,PLXNC1,ARHGAP6,FRRS1L,SDK1,KIRREL3,TBX5,EPB41L3,ANK3,MAP1B,PKP4,EFNA5,CDH6,GPC6,RELN,ERC2,CACNB2,DSG2,CXADR,GPC4,WASF3,PTPRD,PLXNA4,GJC1,WNT5A,NEGR1,ASIC2,JAM3,PHLDB2,SMAD3,ECT2,TUBB,SLC8A3,LRFN5,CTNND2,CDH12,ERBB4,PPFIA2,GAP43,TUBA1A,SNCG,CNKSR2,SNCA,INA,DISC1,ITGA6,CDH10,SHISA6,BCL2,CAP2,CDC20,ANK2,FLRT2,MUSK,WDPCP,SLIT1,TLN2,LRRTM3,DKK1,TMEM108,TLR2,DSP,GABRA2,K…
GO:BP	developmental process	GO:0032502	3.21965e-05	4.49219	6489	229	111	21110	ADGRB3,KIAA1217,CNTN5,ROBO2,MDK,AGBL4,SHROOM3,LGR5,TOX,DNAH11,MAN2A1,CFAP47,PDLIM5,NHSL1,HHIP,AHI1,PTPRO,MEIS1,CABLES1,UTRN,COL9A1,PALLD,PTPRM,MYO16,ADGRV1,TENM3,ADAMTS3,SPAG17,ANOS1,PLXNC1,EPHA6,COL11A1,MDGA2,COL13A1,GFRA1,FOXN4,ADGB,EGFR,SDK1,KIRREL3,HYDIN,TBX5,PRAG1,S1PR3,PRTG,EPB41L3,BRIP1,CLRN1,CFAP54,CALCRL,CYP1B1,FBN1,ZBTB16,SCLT1,ANK3,MAP1B,CDS1,ZFHX3,TMEM178A,LEF1,KIF26B,DOK5,CHST11,EFNA…
GO:BP	spindle midzone assembly	GO:0051255	3.62181e-05	4.44107	14	838	8	21110	KIF23,RACGAP1,AURKB,PRC1,KIF4A,CDCA8,BIRC5,INCENP
GO:BP	centrosome duplication	GO:0051298	3.66463e-05	4.43597	73	1062	18	21110	CEP135,BRCA2,NDC80,GEN1,PLK4,STIL,CEP192,CKAP5,BRCA1,CEP152,CENPJ,RTTN,DEUP1,WDR62,CEP295,CCNF,CEP76,NDE1
GO:BP	cytoskeleton-dependent cytokinesis	GO:0061640	4.01225e-05	4.39661	119	1131	24	21110	DCDC1,ANK3,FMN2,TRIM36,NUSAP1,KIF20B,ECT2,ANLN,KIF23,CIT,CKAP2,RACGAP1,AURKB,KIF4A,KIF20A,CDCA8,CEP55,ESPL1,BIRC5,INCENP,SPTBN1,PLK1,CENPA,SNX18
GO:BP	cell communication involved in cardiac conduction	GO:0086065	4.13369e-05	4.38366	60	881	15	21110	TBX5,CTNNA3,PDE4D,CACNB2,DSG2,CXADR,KCNN2,GJC1,HCN1,CACNA1C,CACNA2D1,KCNJ3,DSC2,ANK2,SCN5A
GO:BP	positive regulation of cell cycle checkpoint	GO:1901978	4.28323e-05	4.36823	19	850	9	21110	MAP3K20,NDC80,GEN1,PBK,AURKB,CDCA8,BIRC5,INCENP,MAD2L1
GO:BP	positive regulation of cell cycle G2/M phase transition	GO:1902751	4.43389e-05	4.35322	31	853	11	21110	RAD51B,ATAD5,DTL,CDC25C,CDK1,CDC7,RRM1,FBXO5,CCNB1,DBF4B,STOX1
GO:BP	non-membrane-bounded organelle assembly	GO:0140694	4.48291e-05	4.34844	389	879	42	21110	CENPK,PRKAA2,CEP135,CDS1,KNTC1,KIF15,KIF11,ASPM,NDC80,TPX2,ANLN,KIF23,CENPF,PLK4,STIL,CEP192,CENPE,KIFC1,RACGAP1,BRCA1,CEP152,CENPJ,RTTN,AURKB,TUBB,PRC1,KIF4A,DLGAP5,FBXO5,CHEK2,DEUP1,NEK2,CDC20,CDCA8,BIRC5,WDR62,CENPN,INCENP,GPSM2,CCNB2,AURKA,MYBL2
GO:BP	motile cilium assembly	GO:0044458	4.87193e-05	4.3123	66	803	15	21110	CFAP47,AHI1,SPAG17,CFAP54,CFAP69,RSPH9,CFAP206,SPEF2,CENPJ,CFAP221,CFAP43,DNAAF3,SPAG16,JHY,CCDC39
GO:BP	positive regulation of cytokinesis	GO:0032467	5.19583e-05	4.28435	45	875	13	21110	PKP4,KIF20B,ECT2,KIF14,KIF23,CIT,RACGAP1,AURKB,CDC6,CDCA8,BIRC5,INCENP,PRKCE
GO:BP	intracellular signal transduction	GO:0035556	5.25946e-05	4.27906	2669	856	164	21110	PLEKHG1,MYO16,ADGRV1,MAGI3,DCDC1,ARHGAP6,PDE7B,EGFR,GNAI1,PRAG1,BRIP1,PRKAA2,CYP1B1,PLEKHG4B,VRK2,CA8,SPSB4,DOK5,LRP2,RELN,LPAR1,PDE4D,NPFFR2,CAMK4,KSR2,STK32B,PDE10A,ELMO1,RRAS2,HELLS,KNTC1,ATAD5,DTL,BRCA2,CHEK1,KANK1,MCTP1,KITLG,ARHGAP24,SLIT2,DOK6,TENM1,RASGRF2,FGF19,RBPMS,FMN2,BCAR3,RPS6KA6,DCDC2,PPM1L,FHIT,DOCK4,NUAK1,NOX4,GHR,MAST4,GUCY1B1,CACNA1C,WNT5A,SIPA1L2,MAP3K20,NRK,AKAP12,ARHGAP29,P…
GO:BP	regulation of DNA damage checkpoint	GO:2000001	5.80863e-05	4.23593	27	787	10	21110	BRCA2,MAP3K20,RNASEH2B,PBK,BARD1,BRCA1,WDR76,CHEK2,RFWD3,RAD51
GO:BP	cell-cell adhesion	GO:0098609	6.93662e-05	4.15885	950	274	35	21110	PCDH7,CNTN5,ROBO2,MDK,PDLIM5,PALLD,PTPRM,ADGRV1,TENM3,COL13A1,EGFR,SDK1,KIRREL3,CTNNA3,CYP1B1,ZBTB16,ANK3,LEF1,KIF26B,PKP4,EFNA5,CDH6,BOC,GPC6,ALCAM,DSG2,FUT9,COL19A1,CXADR,GPC4,PAWR,PTPRD,ADAM19,KITLG,TENM1
GO:BP	cellular component morphogenesis	GO:0032989	9.20347e-05	4.03605	796	186	25	21110	ADGRB3,CNTN5,ROBO2,MDK,PDLIM5,PTPRO,PALLD,PTPRM,MYO16,ANOS1,PLXNC1,EPHA6,KIRREL3,PRTG,EPB41L3,ANK3,MAP1B,EFNA5,LRP2,BOC,RELN,LHX9,CPNE5,SEMA3D,ALCAM
GO:BP	negative regulation of cellular component organization	GO:0051129	0.000107046	3.97043	725	868	62	21110	ROBO2,PTPRO,ARHGAP6,ADD3,PRAG1,MAP1B,LPAR1,NR2F1,SEMA3D,KNTC1,CHEK1,SH3GL3,KANK1,MCTP1,PLEKHH2,ARHGAP24,SLIT2,TBX20,MTBP,WNT5A,JAM3,PHLDB2,PLSCR1,TOP2A,NDC80,GEN1,NUF2,KIF14,TPX2,BUB1B,KIF24,CKAP2,CENPF,BUB1,TTK,BRCA1,AURKB,RAD21,FBXO5,TRAF3IP1,CARMIL1,PRKD1,FBXL2,KIAA0319,CCNB1,STMN2,KANK4,TMSB10,SNCA,DRAXIN,SWAP70,PTTG1,CDC20,RPS6KA2,CDCA8,ESPL1,BIRC5,SPC24,INCENP,PIF1,MAD2L1,FBXO43
GO:BP	cilium movement	GO:0003341	0.000110108	3.95818	199	978	29	21110	DNAH11,CFAP47,SPAG17,TEKT1,HYDIN,CFAP54,LZTFL1,CFAP69,TTC29,CFAP61,RSPH9,ENKUR,TTLL9,DNAI1,ZBBX,CFAP206,SPEF2,DNAH7,CFAP221,CFAP43,SPAG16,JHY,ROPN1L,CCDC39,TEKT3,DNAH9,NME5,NEK10,CCDC40
GO:BP	regulation of chromosome condensation	GO:0060623	0.00011145	3.95292	11	841	7	21110	SMC4,NCAPG,SMC2,NCAPG2,NCAPD3,NCAPD2,NCAPH
GO:BP	regulation of DNA replication	GO:0006275	0.000131163	3.88219	129	855	21	21110	RFC3,EGFR,ATAD5,BCAR3,E2F7,DNA2,BLM,CDK1,CDC7,GINS1,ESCO2,NUCKS1,DBF4,FBXO5,DSCC1,DBF4B,USP37,TICRR,CDC6,E2F8,CCNA2
GO:BP	regulation of cell communication	GO:0010646	0.000136011	3.86642	3423	856	198	21110	ROBO2,MDK,PLEKHG1,LGR5,HHIP,PTPRO,ADGRV1,ADAMTS3,MAGI3,NALCN,ARHGAP6,FRRS1L,EGFR,GNAI1,TBX5,PRAG1,TSHZ3,PRKAA2,CYP1B1,FBN1,PLEKHG4B,ANK3,MAP1B,VRK2,LEF1,RGS22,DOK5,CHST11,EFNA5,LRP2,FBN2,GPC6,RELN,LTBP1,ERC2,LPAR1,ZIC1,SLC38A1,PDE4D,NPFFR2,PRLR,PDE10A,HELLS,ATAD5,BRCA2,CHEK1,CXADR,GPC4,KANK1,ANO1,ZNF423,PAWR,KCNN2,MCTP1,PTPRD,IGFBPL1,KITLG,ARHGAP24,SLIT2,DOK6,TBX20,TENM1,SYT7,RASGRF2,FGF19,RBPMS,…
GO:BP	retinal ganglion cell axon guidance	GO:0031290	0.000143053	3.8445	21	383	7	21110	ROBO2,PTPRO,PTPRM,EFNA5,ALCAM,SLIT2,ATOH7
GO:BP	cell morphogenesis involved in neuron differentiation	GO:0048667	0.000156486	3.80552	590	186	21	21110	ADGRB3,CNTN5,ROBO2,PDLIM5,PTPRO,PALLD,PTPRM,ANOS1,PLXNC1,EPHA6,PRTG,CLRN1,ANK3,MAP1B,EFNA5,PTPRQ,BOC,RELN,LHX9,SEMA3D,ALCAM
GO:BP	positive regulation of G2/M transition of mitotic cell cycle	GO:0010971	0.00018621	3.73	28	853	10	21110	RAD51B,DTL,CDC25C,CDK1,CDC7,RRM1,FBXO5,CCNB1,DBF4B,STOX1
GO:BP	embryo development	GO:0009790	0.000187116	3.72789	1144	522	59	21110	KIAA1217,AGBL4,SHROOM3,MAN2A1,AHI1,MEIS1,ADAMTS3,COL11A1,COL13A1,FOXN4,EGFR,TBX5,CLRN1,FBN1,ZBTB16,LEF1,CHST11,LRP2,FBN2,PTPRQ,ZIC1,FRAS1,RAD51B,MYO3A,TTC39C,NR2F2,BRCA2,XRCC2,CHEK1,PLPP4,FREM2,LMBRD1,KITLG,TBX20,RPS6KA6,AFF3,PLXNA4,ACSL4,LAMA2,CACNA1C,WNT5A,MAP3K20,PHLDB2,SMAD3,RNASEH2B,MMP16,RRM2,TOP2A,E2F7,KIF20B,CDK1,PLK4,STIL,RACGAP1,CENPU,BRCA1,GINS1,PBX3,NCAPG2
GO:BP	chromosome condensation	GO:0030261	0.000193352	3.71365	45	1168	14	21110	SMC4,NCAPG,NUSAP1,TOP2A,CDK1,SMC2,NCAPG2,NCAPD3,NCAPD2,KMT5A,NCAPH,PLK1,TTN,CDCA5
GO:BP	cellular response to stress	GO:0033554	0.000193451	3.71343	1949	855	126	21110	MAN1A1,SLF1,MAGI3,RFC3,EGFR,BRIP1,MMS22L,PRKAA2,CYP1B1,MAP1B,VRK2,DAPL1,CPEB1,RAD51B,ATAD5,DTL,BRCA2,XRCC2,NSD2,POLQ,CHEK1,ANO1,PAWR,RASGRF2,PACRG,FGF19,FANCB,FMN2,ZRANB3,RPS6KA6,TEX15,SPATA18,RADX,NUAK1,FANCM,WNT5A,MAP3K20,SMAD3,RNASEH2B,EZH2,MELK,TOP2A,PARPBP,E2F7,GEN1,DNA2,RAD51AP1,BLM,VRK1,ECT2,CDK1,NEIL3,GTSE1,PBK,EXO1,MSH5,BARD1,BRCA1,RBL1,CDC7,FANCD2,WDHD1,RAD18,POLE2,CHAF1A,FANCI,MCM10,MA…
GO:BP	regulation of attachment of spindle microtubules to kinetochore	GO:0051988	0.000194604	3.71085	19	1013	9	21110	ECT2,RACGAP1,AURKB,CCNB1,NEK2,CDCA8,BIRC5,INCENP,KNSTRN
GO:BP	nuclear DNA replication	GO:0033260	0.000215918	3.66571	38	787	11	21110	ATAD5,BRCA2,DNA2,BLM,CDC7,GINS1,DBF4,CDC45,DBF4B,POLA1,RAD51
GO:BP	regulation of cell division	GO:0051302	0.000223142	3.65142	190	875	26	21110	MDK,DCDC1,PKP4,BRCA2,ASPM,E2F7,KIF20B,BLM,ECT2,KIF14,KIF23,CIT,PLK4,KIF18B,RACGAP1,RBL1,AURKB,PRC1,KIF20A,CDC6,CDCA8,E2F8,BIRC5,INCENP,AURKA,PRKCE
GO:BP	sensory organ morphogenesis	GO:0090596	0.000224429	3.64892	286	198	15	21110	MAN2A1,AHI1,MEIS1,PTPRM,TENM3,COL11A1,FOXN4,SDK1,CLRN1,FBN1,FBN2,PTPRQ,ZIC1,MYO3A,TTC39C
GO:BP	animal organ development	GO:0048513	0.00023712	3.62503	3128	220	63	21110	CNTN5,ROBO2,MDK,LGR5,TOX,DNAH11,MAN2A1,PDLIM5,HHIP,AHI1,PTPRO,MEIS1,UTRN,COL9A1,PALLD,PTPRM,MYO16,ADGRV1,TENM3,COL11A1,MDGA2,COL13A1,GFRA1,FOXN4,EGFR,SDK1,KIRREL3,HYDIN,TBX5,BRIP1,CLRN1,CALCRL,CYP1B1,FBN1,ZBTB16,ZFHX3,LEF1,KIF26B,CHST11,CPAMD8,LRP2,FBN2,PTPRQ,NRIP1,GPC6,RELN,CPE,LPAR1,ZIC1,FRAS1,LHX9,TRPS1,SEMA3D,PRLR,DSG2,MYO3A,TTC39C,NR2F2,HELLS,BRCA2,NSD2,COL19A1,CXADR
GO:BP	cell morphogenesis involved in differentiation	GO:0000904	0.000246577	3.60805	662	186	22	21110	ADGRB3,CNTN5,ROBO2,PDLIM5,PTPRO,PALLD,PTPRM,ANOS1,PLXNC1,EPHA6,PRTG,CLRN1,ANK3,MAP1B,LEF1,EFNA5,PTPRQ,BOC,RELN,LHX9,SEMA3D,ALCAM
GO:BP	cell-cell signaling involved in cardiac conduction	GO:0086019	0.000261286	3.58288	35	881	11	21110	TBX5,CACNB2,CXADR,KCNN2,GJC1,HCN1,CACNA1C,CACNA2D1,KCNJ3,ANK2,SCN5A
GO:BP	positive regulation of mitotic cell cycle spindle assembly checkpoint	GO:0090267	0.000277767	3.55632	12	850	7	21110	NDC80,GEN1,AURKB,CDCA8,BIRC5,INCENP,MAD2L1
GO:BP	positive regulation of spindle checkpoint	GO:0090232	0.000277767	3.55632	12	850	7	21110	NDC80,GEN1,AURKB,CDCA8,BIRC5,INCENP,MAD2L1
GO:BP	chromosome localization	GO:0050000	0.000283604	3.54729	92	1168	20	21110	FMN2,NDC80,NUF2,KIF14,KIF18A,CENPF,CENPE,KIFC1,AURKB,DLGAP5,CCNB1,CDCA8,KIF2C,BIRC5,INCENP,FAM83D,NDE1,SPDL1,PSRC1,CDCA5
GO:BP	regulation of cellular process	GO:0050794	0.00030301	3.51854	11108	857	525	21110	ADGRB3,ROBO2,MDK,PLEKHG1,AGBL4,ESRRG,LGR5,TOX,DNAH11,ZFHX4,MAN2A1,SLF1,PDLIM5,HHIP,AHI1,PTPRO,MEIS1,CABLES1,UTRN,PTPRM,MYO16,ADGRV1,TENM3,ADAMTS3,MAGI3,PLXNC1,EPHA6,NALCN,RFC3,NEAT1,GFRA1,FOXN4,DCDC1,ARHGAP6,FRRS1L,PDE7B,SYNPO2,EGFR,GNAI1,ADD3,ZNF730,TBX5,CP,PRAG1,S1PR3,CTNNA3,TSHZ3,PRTG,EPB41L3,BRIP1,PRKAA2,CLRN1,CALCRL,CYP1B1,FBN1,PLEKHG4B,ZBTB16,DTNA,CEP135,ANK3,MAP1B,CDS1,VRK2,ZFHX3,TMEM178A,…
GO:BP	sensory organ development	GO:0007423	0.000323343	3.49034	601	158	19	21110	LGR5,MAN2A1,AHI1,MEIS1,PTPRM,ADGRV1,TENM3,COL11A1,FOXN4,EGFR,SDK1,CLRN1,CYP1B1,FBN1,LEF1,CPAMD8,FBN2,PTPRQ,ZIC1
GO:BP	protein localization to condensed chromosome	GO:1903083	0.000354666	3.45018	18	525	7	21110	KNTC1,MTBP,KNL1,NDC80,CDK1,TTK,AURKB
GO:BP	protein localization to kinetochore	GO:0034501	0.000354666	3.45018	18	525	7	21110	KNTC1,MTBP,KNL1,NDC80,CDK1,TTK,AURKB
GO:BP	regulation of DNA metabolic process	GO:0051052	0.000384067	3.41559	527	855	48	21110	TOX,SLF1,RFC3,EGFR,CYP1B1,ATAD5,NSD2,POLQ,CHEK1,FANCB,FMN2,ZRANB3,BCAR3,TEX15,RADX,NOX4,PARPBP,E2F7,DNA2,RAD51AP1,BLM,CDK1,BARD1,BRCA1,PRIM2,CDC7,GINS1,AURKB,ESCO2,NUCKS1,DBF4,FBXO5,EYA1,DSCC1,NEK2,DBF4B,USP37,TICRR,APLF,SUPT3H,RBBP8,CDC6,RAD51,E2F8,FOXM1,PIF1,STOX1,CCNA2
GO:BP	interstrand cross-link repair	GO:0036297	0.000413714	3.3833	41	1162	13	21110	FANCB,FANCM,RAD51AP1,NEIL3,FANCD2,FANCI,NUCKS1,FANCA,MCM8,RFWD3,RAD51,FANCC,RNF168
GO:BP	regulation of microtubule cytoskeleton organization	GO:0070507	0.000438848	3.35769	158	743	21	21110	GNAI1,PRKAA2,MAP1B,EFNA5,TRIM36,PHLDB2,KIF15,TPX2,KIF18A,CKAP2,STIL,SKA3,CKAP5,CENPJ,TACC3,SKA2,TRAF3IP1,STMN2,SNCA,BORA,RASSF8
GO:BP	signal transduction in response to DNA damage	GO:0042770	0.000440501	3.35605	192	836	25	21110	BRIP1,ATAD5,DTL,BRCA2,CHEK1,RPS6KA6,MAP3K20,RNASEH2B,E2F7,BLM,CDK1,GTSE1,PBK,BARD1,BRCA1,FANCD2,CLSPN,WDR76,CHEK2,GADD45A,TICRR,RFWD3,RAD51,FOXM1,KMT5A
GO:BP	mucociliary clearance	GO:0120197	0.000526368	3.27871	8	949	6	21110	CFAP54,CFAP221,CFAP43,SPAG16,DNAH9,NEK10
GO:BP	cellular component organization	GO:0016043	0.000533358	3.27298	8138	859	403	21110	ADGRB3,CNTN5,ROBO2,FIGN,MDK,SHROOM3,TOX,MAN2A1,CFAP47,SLF1,PDLIM5,AHI1,PTPRO,XIST,UTRN,COL9A1,PALLD,PTPRM,COL23A1,MYO16,ADGRV1,TENM3,ADAMTS3,SPAG17,ANOS1,PLXNC1,EPHA6,COL11A1,RFC3,COL13A1,GFRA1,TEKT1,ARHGAP6,KCNQ1OT1,FRRS1L,SYNPO2,EGFR,GNAI1,SDK1,ADD3,KIRREL3,HYDIN,TBX5,PRAG1,CTNNA3,PRTG,EPB41L3,DIAPH3,CENPK,BRIP1,MMS22L,PRKAA2,CLRN1,CFAP54,CYP1B1,SCLT1,CEP135,ANK3,MAP1B,CDS1,LCA5,PKP4,EFNA5,LRP2…
GO:BP	female meiotic nuclear division	GO:0007143	0.000545697	3.26305	34	980	11	21110	FMN2,TOP2A,NDC80,TTK,MASTL,FBXO5,NCAPH,CCNB2,AURKA,SYCP2,PLK1
GO:BP	cardiac muscle cell-cardiac muscle cell adhesion	GO:0086042	0.000566362	3.24691	7	1204	6	21110	CTNNA3,DSG2,CXADR,DSC2,DSP,PKP2
GO:BP	DNA geometric change	GO:0032392	0.000567016	3.2464	85	846	16	21110	RFC3,BRIP1,POLQ,ZRANB3,FANCM,TOP2A,DNA2,BLM,GINS1,HMGB2,CDC45,RAD54B,MCM8,DSCC1,RAD51,PIF1
GO:BP	regulation of signaling	GO:0023051	0.000589128	3.22979	3413	854	194	21110	ROBO2,MDK,PLEKHG1,LGR5,HHIP,PTPRO,ADGRV1,ADAMTS3,MAGI3,NALCN,ARHGAP6,FRRS1L,EGFR,GNAI1,PRAG1,TSHZ3,PRKAA2,CYP1B1,FBN1,PLEKHG4B,MAP1B,VRK2,LEF1,RGS22,DOK5,CHST11,EFNA5,LRP2,FBN2,GPC6,RELN,LTBP1,ERC2,LPAR1,ZIC1,SLC38A1,PDE4D,NPFFR2,PRLR,PDE10A,HELLS,ATAD5,BRCA2,CHEK1,GPC4,KANK1,ANO1,ZNF423,PAWR,KCNN2,MCTP1,PTPRD,IGFBPL1,KITLG,ARHGAP24,SLIT2,DOK6,TBX20,TENM1,SYT7,RASGRF2,FGF19,RBPMS,BCAR3,RPS6KA6,ST…
GO:BP	DNA damage checkpoint signaling	GO:0000077	0.000648381	3.18817	128	555	16	21110	BRIP1,DTL,BRCA2,CHEK1,MAP3K20,RNASEH2B,BLM,CDK1,GTSE1,PBK,BARD1,BRCA1,FANCD2,CLSPN,WDR76,CHEK2
GO:BP	regulation of plasma membrane bounded cell projection organization	GO:0120035	0.00068648	3.16337	642	737	49	21110	ADGRB3,ROBO2,MDK,TOX,PDLIM5,PTPRO,TENM3,PLXNC1,PRAG1,CLRN1,CEP135,MAP1B,EFNA5,RELN,LPAR1,NR2F1,SEMA3D,MYO3A,FUT9,KANK1,PTPRD,ARHGAP24,SLIT2,TENM1,DCDC2,PLXNA4,ATOH7,WNT5A,NEGR1,EZH2,ANLN,KIF24,CENPJ,SYNE2,CARMIL1,PRKD1,SDC2,KIAA0319,ODF2,PPFIA2,ROBO1,STMN2,GAP43,PLPPR5,DRAXIN,DISC1,ITGA6,PPP1R16B,CREB3L2
GO:BP	protein localization to chromosome	GO:0034502	0.000701785	3.1538	118	531	15	21110	SLF1,LEF1,KNTC1,BRCA2,MTBP,EZH2,KNL1,NDC80,VRK1,BUB1B,CDK1,TTK,AURKB,RAD21,ESCO2
GO:BP	microtubule bundle formation	GO:0001578	0.000738886	3.13142	126	803	19	21110	CFAP47,SPAG17,HYDIN,MAP1B,CFAP69,RSPH9,DNAI1,CFAP206,SPEF2,DNAH7,PRC1,CFAP43,CFAP74,DCX,DNAAF3,SPAG16,JHY,KIF20A,CCDC39
GO:BP	response to ionizing radiation	GO:0010212	0.000739073	3.13131	143	851	21	21110	BRCA2,XRCC2,MAP3K20,RAD51AP1,BLM,ECT2,BARD1,BRCA1,FANCD2,NUCKS1,CHEK2,GADD45A,RAD54B,EYA1,TICRR,BCL2,IKBIP,RFWD3,RAD51,NET1,RAD54L
GO:BP	camera-type eye morphogenesis	GO:0048593	0.000836493	3.07754	132	72	7	21110	MAN2A1,AHI1,MEIS1,PTPRM,TENM3,FOXN4,SDK1
GO:BP	cell motility	GO:0048870	0.000856182	3.06743	1705	1285	154	21110	MDK,DNAH11,CFAP47,PTPRO,PALLD,DNAH14,PTPRM,PLXNC1,GFRA1,TEKT1,SYNPO2,EGFR,KIRREL3,TBX5,PRAG1,CTNNA3,CLRN1,CFAP54,CYP1B1,MAP1B,LEF1,GPC6,RELN,LPAR1,LZTFL1,SEMA3D,ELMO1,RRAS2,NR2F2,FUT9,CXADR,CFAP69,GPC4,KANK1,MCTP1,LDB2,RSPH9,KITLG,ARHGAP24,SPARC,SLIT2,TBX20,FGF19,ENKUR,FMN2,TTLL9,DCDC2,DNAI1,DOCK4,PLXNA4,ONECUT2,ITGA9,CFAP206,LAMA2,TAFA4,SPEF2,WNT5A,ONECUT1,AKAP12,DNAH7,JAM3,PHLDB2,SMAD3,ASPM,KIF…
GO:BP	metaphase plate congression	GO:0051310	0.000882737	3.05417	73	1168	17	21110	NDC80,NUF2,KIF14,KIF18A,CENPF,CENPE,KIFC1,AURKB,CCNB1,CDCA8,KIF2C,BIRC5,INCENP,FAM83D,SPDL1,PSRC1,CDCA5
GO:BP	mitotic metaphase plate congression	GO:0007080	0.00100084	2.99963	58	1168	15	21110	NDC80,NUF2,KIF14,KIF18A,CENPE,KIFC1,AURKB,CCNB1,CDCA8,KIF2C,BIRC5,INCENP,SPDL1,PSRC1,CDCA5
GO:BP	cell junction assembly	GO:0034329	0.00116607	2.93328	444	1255	54	21110	ADGRB3,CNTN5,ROBO2,PDLIM5,PTPRO,ARHGAP6,SDK1,KIRREL3,TBX5,EPB41L3,MAP1B,PKP4,EFNA5,CDH6,GPC6,GPC4,PTPRD,GJC1,WNT5A,NEGR1,ASIC2,JAM3,PHLDB2,SMAD3,ECT2,LRFN5,CTNND2,CDH12,ERBB4,GAP43,SNCA,ITGA6,CDH10,BCL2,ANK2,FLRT2,MUSK,WDPCP,SLIT1,TLN2,LRRTM3,DKK1,TLR2,GABRA2,MDGA1,ST8SIA2,UGT8,NRG3,PATJ,PCLO,PKP2,POU4F1,DNM3,CDH7
GO:BP	centriole replication	GO:0007099	0.00117573	2.92969	42	1027	12	21110	CEP135,PLK4,STIL,CEP192,BRCA1,CEP152,CENPJ,RTTN,DEUP1,WDR62,CEP295,CEP76
GO:BP	cardiac muscle cell action potential involved in contraction	GO:0086002	0.00120983	2.91728	50	1204	14	21110	CTNNA3,CACNB2,DSG2,KCNN2,GJC1,CACNA1C,CACNA2D1,KCNJ3,DSC2,ANK2,SCN5A,FGF12,DSP,PKP2
GO:BP	bundle of His cell to Purkinje myocyte communication	GO:0086069	0.00122802	2.9108	15	1204	8	21110	TBX5,CTNNA3,DSG2,CACNA2D1,DSC2,SCN5A,DSP,PKP2
GO:BP	actin filament-based process	GO:0030029	0.00128359	2.89157	817	422	39	21110	MDK,SHROOM3,PDLIM5,UTRN,PALLD,ARHGAP6,SYNPO2,ADD3,CTNNA3,EPB41L3,DIAPH3,CLRN1,EFNA5,LPAR1,PDE4D,CACNB2,IQGAP2,DSG2,MYO3A,ELMO1,CXADR,KANK1,PAWR,WASF3,KCNN2,PLEKHH2,SLIT2,TENM1,PAM,FMN2,WIPF1,COTL1,GJC1,CACNA1C,NRK,MYO5C,JAM3,PHLDB2,SMAD3
GO:BP	regulation of cell projection organization	GO:0031344	0.00129641	2.88726	656	737	49	21110	ADGRB3,ROBO2,MDK,TOX,PDLIM5,PTPRO,TENM3,PLXNC1,PRAG1,CLRN1,CEP135,MAP1B,EFNA5,RELN,LPAR1,NR2F1,SEMA3D,MYO3A,FUT9,KANK1,PTPRD,ARHGAP24,SLIT2,TENM1,DCDC2,PLXNA4,ATOH7,WNT5A,NEGR1,EZH2,ANLN,KIF24,CENPJ,SYNE2,CARMIL1,PRKD1,SDC2,KIAA0319,ODF2,PPFIA2,ROBO1,STMN2,GAP43,PLPPR5,DRAXIN,DISC1,ITGA6,PPP1R16B,CREB3L2
GO:BP	axoneme assembly	GO:0035082	0.00137655	2.86121	95	803	16	21110	CFAP47,SPAG17,HYDIN,CFAP69,RSPH9,DNAI1,CFAP206,SPEF2,DNAH7,CFAP43,CFAP74,DCX,DNAAF3,SPAG16,JHY,CCDC39
GO:BP	meiotic chromosome condensation	GO:0010032	0.00143908	2.84192	6	841	5	21110	SMC4,SMC2,NCAPD3,NCAPD2,NCAPH
GO:BP	cardiac muscle cell action potential	GO:0086001	0.001454	2.83744	74	1054	16	21110	CTNNA3,ANK3,CACNB2,DSG2,CXADR,KCNN2,GJC1,HCN1,CACNA1C,CACNA2D1,KCNJ3,DSC2,ANK2,SCN5A,FGF12,DSP
GO:BP	synapse assembly	GO:0007416	0.00169378	2.77114	202	1225	31	21110	ADGRB3,CNTN5,ROBO2,PDLIM5,SDK1,KIRREL3,MAP1B,EFNA5,GPC6,GPC4,PTPRD,WNT5A,NEGR1,ASIC2,LRFN5,ERBB4,GAP43,SNCA,FLRT2,MUSK,SLIT1,LRRTM3,DKK1,TLR2,GABRA2,MDGA1,ST8SIA2,NRG3,PCLO,POU4F1,DNM3
GO:BP	regulation of mitotic cytokinesis	GO:1902412	0.00176018	2.75444	10	838	6	21110	DCDC1,KIF20B,AURKB,CDCA8,BIRC5,INCENP
GO:BP	axonogenesis	GO:0007409	0.00180888	2.74259	460	186	17	21110	CNTN5,ROBO2,PTPRO,PALLD,PTPRM,ANOS1,PLXNC1,EPHA6,PRTG,ANK3,MAP1B,EFNA5,BOC,RELN,LHX9,SEMA3D,ALCAM
GO:BP	establishment of chromosome localization	GO:0051303	0.00182789	2.73805	85	1168	18	21110	NDC80,NUF2,KIF14,KIF18A,CENPF,CENPE,KIFC1,AURKB,CCNB1,CDCA8,KIF2C,BIRC5,INCENP,FAM83D,NDE1,SPDL1,PSRC1,CDCA5
GO:BP	attachment of mitotic spindle microtubules to kinetochore	GO:0051315	0.00191488	2.71786	21	838	8	21110	NDC80,NUF2,CENPE,AURKB,CDCA8,KIF2C,BIRC5,INCENP
GO:BP	DNA conformation change	GO:0071103	0.0020342	2.69161	93	846	16	21110	RFC3,BRIP1,POLQ,ZRANB3,FANCM,TOP2A,DNA2,BLM,GINS1,HMGB2,CDC45,RAD54B,MCM8,DSCC1,RAD51,PIF1
GO:BP	regulation of negative chemotaxis	GO:0050923	0.00204096	2.69017	4	636	4	21110	ROBO2,SLIT2,PLXNA4,ROBO1
GO:BP	regulation of mitotic spindle checkpoint	GO:1903504	0.00213209	2.67119	21	850	8	21110	NDC80,GEN1,AURKB,CCNB1,CDCA8,BIRC5,INCENP,MAD2L1
GO:BP	regulation of mitotic cell cycle spindle assembly checkpoint	GO:0090266	0.00213209	2.67119	21	850	8	21110	NDC80,GEN1,AURKB,CCNB1,CDCA8,BIRC5,INCENP,MAD2L1
GO:BP	regulation of spindle checkpoint	GO:0090231	0.00213209	2.67119	21	850	8	21110	NDC80,GEN1,AURKB,CCNB1,CDCA8,BIRC5,INCENP,MAD2L1
GO:BP	chromosome organization involved in meiotic cell cycle	GO:0070192	0.0022127	2.65508	65	948	14	21110	BRIP1,TEX15,SMC4,MND1,SMC2,MSH5,FANCD2,NCAPD3,DMC1,RAD51,NDC1,NCAPD2,NCAPH,SYCP2
GO:BP	cardiac conduction	GO:0061337	0.00242262	2.61572	96	935	17	21110	TBX5,CTNNA3,PDE4D,CACNB2,DSG2,CXADR,KCNN2,GJC1,HCN1,CACNA1C,SLC8A3,CACNA2D1,KCNJ3,DSC2,ANK2,SCN5A,TMEM65
GO:BP	multicellular organismal process	GO:0032501	0.0025661	2.59073	7716	242	125	21110	ADGRB3,KIAA1217,CNTN5,ROBO2,MDK,AGBL4,ESRRG,SHROOM3,LGR5,TOX,DNAH11,MAN2A1,CFAP47,PDLIM5,HHIP,AHI1,PTPRO,MEIS1,CABLES1,UTRN,PALLD,PTPRM,MYO16,ADGRV1,TENM3,ADAMTS3,SPAG17,ANOS1,PLXNC1,EPHA6,COL11A1,MDGA2,COL13A1,GFRA1,FOXN4,ADGB,EGFR,SDK1,KIRREL3,HYDIN,TBX5,PRAG1,S1PR3,CTNNA3,TSHZ3,PRTG,EPB41L3,BRIP1,PRKAA2,CLRN1,CFAP54,CALCRL,CYP1B1,FBN1,ZBTB16,SCLT1,DTNA,ANK3,MAP1B,ZFHX3,TMEM178A,LEF1,KIF26B,LCA…
GO:BP	cell-cell adhesion via plasma-membrane adhesion molecules	GO:0098742	0.0027346	2.56311	285	274	16	21110	PCDH7,ROBO2,PALLD,PTPRM,TENM3,SDK1,KIRREL3,EFNA5,CDH6,GPC6,ALCAM,DSG2,CXADR,GPC4,PTPRD,TENM1
GO:BP	olfactory bulb interneuron differentiation	GO:0021889	0.0029586	2.52891	11	805	6	21110	ROBO2,SLIT2,WNT5A,ERBB4,ROBO1,SALL1
GO:BP	cellular response to stimulus	GO:0051716	0.00300818	2.5217	7521	856	371	21110	ADGRB3,ROBO2,MDK,PLEKHG1,ESRRG,SHROOM3,LGR5,MAN1A1,SLF1,HHIP,AHI1,PTPRO,PTPRM,MYO16,ADGRV1,TENM3,ADAMTS3,MAGI3,PLXNC1,EPHA6,RFC3,GFRA1,DCDC1,ARHGAP6,FRRS1L,PDE7B,EGFR,GNAI1,PRAG1,S1PR3,PTPRN2,BRIP1,MMS22L,PRKAA2,CALCRL,CYP1B1,FBN1,PLEKHG4B,DTNA,ANK3,MAP1B,CDS1,VRK2,CA8,LEF1,RGS22,SPSB4,DOK5,CHST11,EFNA5,LRP2,FBN2,CDH6,BOC,NRIP1,GPC6,RELN,LTBP1,CPE,DAPL1,LPAR1,ZIC1,PDE4D,NR2F1,NPFFR2,CAMK4,IQGAP2,…
GO:BP	cerebrospinal fluid circulation	GO:0090660	0.00325716	2.48716	15	912	7	21110	CFAP54,CFAP221,CFAP43,SPAG16,JHY,CCDC39,DNAH9
GO:BP	centriole assembly	GO:0098534	0.00345497	2.46156	46	1027	12	21110	CEP135,PLK4,STIL,CEP192,BRCA1,CEP152,CENPJ,RTTN,DEUP1,WDR62,CEP295,CEP76
GO:BP	sequestering of TGFbeta in extracellular matrix	GO:0035583	0.00364085	2.4388	4	152	3	21110	FBN1,FBN2,LTBP1
GO:BP	cellular component organization or biogenesis	GO:0071840	0.003972	2.40099	8345	859	406	21110	ADGRB3,CNTN5,ROBO2,FIGN,MDK,SHROOM3,TOX,MAN2A1,CFAP47,SLF1,PDLIM5,AHI1,PTPRO,XIST,UTRN,COL9A1,PALLD,PTPRM,COL23A1,MYO16,ADGRV1,TENM3,ADAMTS3,SPAG17,ANOS1,PLXNC1,EPHA6,COL11A1,RFC3,COL13A1,GFRA1,TEKT1,ARHGAP6,KCNQ1OT1,FRRS1L,SYNPO2,EGFR,GNAI1,SDK1,ADD3,KIRREL3,HYDIN,TBX5,PRAG1,CTNNA3,PRTG,EPB41L3,DIAPH3,CENPK,BRIP1,MMS22L,PRKAA2,CLRN1,CFAP54,CYP1B1,SCLT1,CEP135,ANK3,MAP1B,CDS1,LCA5,PKP4,EFNA5,LRP2…
GO:BP	chemotaxis	GO:0006935	0.00397913	2.40021	631	422	32	21110	CNTN5,ROBO2,MDK,PTPRO,PALLD,PTPRM,ANOS1,PLXNC1,EPHA6,PRTG,LEF1,EFNA5,BOC,RELN,LPAR1,LHX9,SEMA3D,ALCAM,CXADR,ST6GAL1,KIF5C,PTPRD,SLIT2,DOCK4,PLXNA4,ITGA9,LAMA2,TAFA4,ATOH7,WNT5A,JAM3,SMAD3
GO:BP	homologous chromosome segregation	GO:0045143	0.00398572	2.39949	66	980	14	21110	BRIP1,FMN2,TEX15,MND1,SGO1,MSH5,FANCD2,SGO2,DMC1,PTTG1,NDC1,ESPL1,SYCP2,PLK1
GO:BP	eye morphogenesis	GO:0048592	0.00425291	2.37131	168	72	7	21110	MAN2A1,AHI1,MEIS1,PTPRM,TENM3,FOXN4,SDK1
GO:BP	taxis	GO:0042330	0.00425554	2.37104	633	422	32	21110	CNTN5,ROBO2,MDK,PTPRO,PALLD,PTPRM,ANOS1,PLXNC1,EPHA6,PRTG,LEF1,EFNA5,BOC,RELN,LPAR1,LHX9,SEMA3D,ALCAM,CXADR,ST6GAL1,KIF5C,PTPRD,SLIT2,DOCK4,PLXNA4,ITGA9,LAMA2,TAFA4,ATOH7,WNT5A,JAM3,SMAD3
GO:BP	retina layer formation	GO:0010842	0.00439187	2.35735	26	72	4	21110	AHI1,PTPRM,FOXN4,SDK1
GO:BP	positive regulation of DNA replication	GO:0045740	0.00451153	2.34568	39	826	10	21110	EGFR,ATAD5,BCAR3,E2F7,DNA2,CDK1,CDC7,DBF4,DBF4B,E2F8
GO:BP	multicellular organismal reproductive process	GO:0048609	0.00457438	2.33967	902	899	69	21110	ROBO2,MDK,LGR5,CFAP47,SPAG17,ADGB,BRIP1,CFAP54,CYP1B1,ZBTB16,NRIP1,LZTFL1,NR2F2,BRCA2,CXADR,CFAP69,SLIT2,PACRG,PAM,FMN2,TEX15,CFAP206,ACSL4,SPEF2,JAM3,SHB,CNTRL,KNL1,ASPM,TOP2A,NDC80,CDC25C,KIF18A,TTK,RACGAP1,FANCD2,MYBL1,MASTL,HMGB2,FANCA,FBXO5,CFAP221,CFAP43,ODF2,MCM8,UCHL1,DMC1,TSGA10,CSMD1,SPAG16,SERPINE2,SHISA6,BCL2,PTTG1,PMFBP1,MAST2,PYGO1,NDC1,ROPN1L,RPS6KA2,ASF1B,NCAPH,CCNB2,AURKA,TEKT3,C…
GO:BP	regulation of synapse assembly	GO:0051963	0.0046817	2.3296	115	1099	20	21110	ADGRB3,ROBO2,PDLIM5,EFNA5,GPC6,GPC4,PTPRD,WNT5A,NEGR1,ASIC2,LRFN5,SNCA,FLRT2,MUSK,SLIT1,LRRTM3,DKK1,TLR2,MDGA1,ST8SIA2
GO:BP	regulation of heart rate by cardiac conduction	GO:0086091	0.0047316	2.32499	41	1204	12	21110	CTNNA3,CACNB2,DSG2,HCN1,CACNA1C,CACNA2D1,KCNJ3,DSC2,ANK2,SCN5A,DSP,PKP2
GO:BP	positive regulation of mitotic cytokinesis	GO:1903490	0.00478538	2.32008	7	838	5	21110	KIF20B,AURKB,CDCA8,BIRC5,INCENP
GO:BP	female gamete generation	GO:0007292	0.00546756	2.26221	164	980	23	21110	MDK,LGR5,NRIP1,BRCA2,FMN2,SHB,CNTRL,ASPM,TOP2A,NDC80,TTK,MASTL,FBXO5,MCM8,DMC1,BCL2,RPS6KA2,NCAPH,CCNB2,AURKA,TAF4B,SYCP2,PLK1
GO:BP	chemical synaptic transmission	GO:0007268	0.00560651	2.25131	752	1149	72	21110	NALCN,FRRS1L,PDE7B,PTPRN2,TSHZ3,AMPH,DTNA,MAP1B,CADPS2,RELN,ERC2,SLC38A1,CACNB2,KCNN2,MCTP1,PTPRD,SYT7,RASGRF2,STXBP5,GJC1,LAMA2,GUCY1B1,HCN1,WNT5A,KCNMB4,AKAP12,ASIC2,EZH2,GLRA2,SLC8A3,CACNA1A,RPH3AL,STXBP5L,CHRNA5,SNCG,SNCA,INA,SHISA9,SYN3,SLC18A2,RIMS1,DLGAP2,DISC1,PRKAR2B,NR3C1,GUCY1A1,SERPINE2,SHISA6,NSG1,SYT4,CDC20,RPS6KA2,PRKCE,RIMS2,NETO2,FGF12,CACNG8,DKK1,TMEM108,RIT2,GABRA2,IGSF11,RIC3,…
GO:BP	anterograde trans-synaptic signaling	GO:0098916	0.00560651	2.25131	752	1149	72	21110	NALCN,FRRS1L,PDE7B,PTPRN2,TSHZ3,AMPH,DTNA,MAP1B,CADPS2,RELN,ERC2,SLC38A1,CACNB2,KCNN2,MCTP1,PTPRD,SYT7,RASGRF2,STXBP5,GJC1,LAMA2,GUCY1B1,HCN1,WNT5A,KCNMB4,AKAP12,ASIC2,EZH2,GLRA2,SLC8A3,CACNA1A,RPH3AL,STXBP5L,CHRNA5,SNCG,SNCA,INA,SHISA9,SYN3,SLC18A2,RIMS1,DLGAP2,DISC1,PRKAR2B,NR3C1,GUCY1A1,SERPINE2,SHISA6,NSG1,SYT4,CDC20,RPS6KA2,PRKCE,RIMS2,NETO2,FGF12,CACNG8,DKK1,TMEM108,RIT2,GABRA2,IGSF11,RIC3,…
GO:BP	supramolecular fiber organization	GO:0097435	0.00572687	2.24208	819	1233	81	21110	SHROOM3,ADAMTS3,COL11A1,COL13A1,ARHGAP6,SYNPO2,ADD3,CTNNA3,DIAPH3,CLRN1,CYP1B1,MAP1B,PTPRQ,LPAR1,IQGAP2,ELMO1,KANK1,KATNAL2,PAWR,WASF3,PLEKHH2,SLIT2,TENM1,FMN2,WIPF1,CEP126,COTL1,MYO5C,PHLDB2,SMAD3,TPX2,KIF18A,CIT,KIF24,CKAP2,CEP192,CKAP5,KIF18B,CENPJ,FBXO5,CARMIL1,PPM1E,STMN2,COL5A2,KANK4,TUBA1A,TMSB10,SNCA,PRPH,INA,SWAP70,BCL2,NEDD1,KIF2C,SH3KBP1,PRKCE,BAIAP2L1,SPTBN1,ADAMTS2,MZT1,RND3,GAS7,CDK…
GO:BP	homophilic cell adhesion via plasma membrane adhesion molecules	GO:0007156	0.00607674	2.21633	170	75	7	21110	PCDH7,ROBO2,PALLD,PTPRM,TENM3,SDK1,KIRREL3
GO:BP	spindle assembly involved in female meiosis I	GO:0007057	0.00643522	2.19144	4	847	4	21110	NDC80,FBXO5,CCNB2,AURKA
GO:BP	negative regulation of G2/M transition of mitotic cell cycle	GO:0010972	0.00665735	2.1767	63	776	12	21110	DTL,CHEK1,BLM,CDK1,BARD1,BRCA1,AURKB,RAD21,CLSPN,TICRR,RBBP8,CDC6
GO:BP	DNA duplex unwinding	GO:0032508	0.00682875	2.16566	79	846	14	21110	RFC3,BRIP1,POLQ,FANCM,TOP2A,DNA2,BLM,GINS1,CDC45,RAD54B,MCM8,DSCC1,RAD51,PIF1
GO:BP	retina morphogenesis in camera-type eye	GO:0060042	0.00705948	2.15123	65	72	5	21110	MAN2A1,AHI1,PTPRM,FOXN4,SDK1
GO:BP	axon development	GO:0061564	0.00715388	2.14546	509	186	17	21110	CNTN5,ROBO2,PTPRO,PALLD,PTPRM,ANOS1,PLXNC1,EPHA6,PRTG,ANK3,MAP1B,EFNA5,BOC,RELN,LHX9,SEMA3D,ALCAM
GO:BP	modulation of chemical synaptic transmission	GO:0050804	0.00775751	2.11028	490	1146	52	21110	NALCN,FRRS1L,TSHZ3,MAP1B,RELN,ERC2,SLC38A1,KCNN2,MCTP1,PTPRD,SYT7,RASGRF2,STXBP5,LAMA2,GUCY1B1,HCN1,WNT5A,KCNMB4,AKAP12,SLC8A3,CACNA1A,STXBP5L,CHRNA5,SNCG,SNCA,INA,SHISA9,SYN3,RIMS1,DLGAP2,DISC1,PRKAR2B,GUCY1A1,SERPINE2,SHISA6,NSG1,SYT4,CDC20,PRKCE,RIMS2,NETO2,CACNG8,DKK1,TMEM108,IGSF11,CHRNB4,IQSEC2,GRM3,HOMER1,CHRNA7,NRG3,NMU
GO:BP	trans-synaptic signaling	GO:0099537	0.0078061	2.10757	759	1149	72	21110	NALCN,FRRS1L,PDE7B,PTPRN2,TSHZ3,AMPH,DTNA,MAP1B,CADPS2,RELN,ERC2,SLC38A1,CACNB2,KCNN2,MCTP1,PTPRD,SYT7,RASGRF2,STXBP5,GJC1,LAMA2,GUCY1B1,HCN1,WNT5A,KCNMB4,AKAP12,ASIC2,EZH2,GLRA2,SLC8A3,CACNA1A,RPH3AL,STXBP5L,CHRNA5,SNCG,SNCA,INA,SHISA9,SYN3,SLC18A2,RIMS1,DLGAP2,DISC1,PRKAR2B,NR3C1,GUCY1A1,SERPINE2,SHISA6,NSG1,SYT4,CDC20,RPS6KA2,PRKCE,RIMS2,NETO2,FGF12,CACNG8,DKK1,TMEM108,RIT2,GABRA2,IGSF11,RIC3,…
GO:BP	protein monoubiquitination	GO:0006513	0.00788417	2.10324	81	604	12	21110	DTL,BRCA2,FANCB,FANCM,BARD1,BRCA1,RAD18,UBE2T,FANCA,UHRF1,DDB2,FBXL2
GO:BP	regulation of trans-synaptic signaling	GO:0099177	0.00823167	2.08451	491	1146	52	21110	NALCN,FRRS1L,TSHZ3,MAP1B,RELN,ERC2,SLC38A1,KCNN2,MCTP1,PTPRD,SYT7,RASGRF2,STXBP5,LAMA2,GUCY1B1,HCN1,WNT5A,KCNMB4,AKAP12,SLC8A3,CACNA1A,STXBP5L,CHRNA5,SNCG,SNCA,INA,SHISA9,SYN3,RIMS1,DLGAP2,DISC1,PRKAR2B,GUCY1A1,SERPINE2,SHISA6,NSG1,SYT4,CDC20,PRKCE,RIMS2,NETO2,CACNG8,DKK1,TMEM108,IGSF11,CHRNB4,IQSEC2,GRM3,HOMER1,CHRNA7,NRG3,NMU
GO:BP	cilium-dependent cell motility	GO:0060285	0.0083412	2.07877	163	864	21	21110	DNAH11,CFAP47,DNAH14,TEKT1,CFAP54,LZTFL1,CFAP69,RSPH9,ENKUR,TTLL9,DNAI1,CFAP206,SPEF2,DNAH7,CFAP221,CFAP43,SPAG16,ROPN1L,CCDC39,DNAH6,TEKT3
GO:BP	cilium or flagellum-dependent cell motility	GO:0001539	0.0083412	2.07877	163	864	21	21110	DNAH11,CFAP47,DNAH14,TEKT1,CFAP54,LZTFL1,CFAP69,RSPH9,ENKUR,TTLL9,DNAI1,CFAP206,SPEF2,DNAH7,CFAP221,CFAP43,SPAG16,ROPN1L,CCDC39,DNAH6,TEKT3
GO:BP	bundle of His cell-Purkinje myocyte adhesion involved in cell communication	GO:0086073	0.00855684	2.06769	6	1204	5	21110	CTNNA3,DSG2,DSC2,DSP,PKP2
GO:BP	heart development	GO:0007507	0.00861173	2.06491	594	1207	62	21110	ROBO2,DNAH11,PDLIM5,AHI1,COL11A1,FOXN4,EGFR,TBX5,CALCRL,FBN1,LRP2,CPE,DSG2,NSD2,CXADR,FREM2,SLIT2,TBX20,FGF19,PAM,DNAI1,NOX4,PLXNA4,GJC1,CACNA1C,WNT5A,SMAD3,CNTRL,CDK1,STIL,SOX11,ERBB4,ROBO1,EYA1,DNAAF3,NPY1R,CCDC39,SALL1,TGFBR3,RPS6KA2,ANK2,SCN5A,FLRT2,BICC1,TMEM65,CCDC40,FGF12,PARVA,DKK1,DLL1,OXCT1,DSP,ARL13B,POU4F2,TTN,ID3,OVOL2,DLL4,GPC3,SMYD4,PKP2,POU4F1
GO:BP	regulation of DNA-templated DNA replication	GO:0090329	0.00874752	2.05811	51	826	11	21110	RFC3,E2F7,BLM,CDC7,GINS1,DBF4,FBXO5,DSCC1,DBF4B,TICRR,E2F8
GO:BP	negative regulation of cell cycle G2/M phase transition	GO:1902750	0.00939453	2.02713	65	776	12	21110	DTL,CHEK1,BLM,CDK1,BARD1,BRCA1,AURKB,RAD21,CLSPN,TICRR,RBBP8,CDC6
GO:BP	circulatory system development	GO:0072359	0.00963264	2.01625	1123	1269	105	21110	ADGRB3,ROBO2,MDK,DNAH11,PDLIM5,AHI1,MEIS1,PTPRM,COL11A1,FOXN4,EGFR,TBX5,CALCRL,CYP1B1,FBN1,LEF1,LRP2,CPE,DSG2,NR2F2,NSD2,CXADR,FREM2,ARHGAP24,SPARC,SLIT2,TBX20,FGF19,PAM,DNAI1,NOX4,PLXNA4,GJC1,CACNA1C,WNT5A,JAM3,SMAD3,CEMIP2,SHB,CNTRL,E2F7,APOLD1,CDK1,STIL,BRCA1,PDE3B,SOX11,GADD45A,PRKD1,ERBB4,ROBO1,EYA1,CLIC4,DNAAF3,PPP1R16B,NPY1R,CCDC39,SALL1,TGFBR3,COL8A1,RPS6KA2,E2F8,ANP32B,ANK2,SCN5A,ADIPOR2…
GO:BP	positive regulation of DNA metabolic process	GO:0051054	0.00983447	2.00725	305	828	30	21110	TOX,SLF1,RFC3,EGFR,CYP1B1,ATAD5,NSD2,FANCB,FMN2,BCAR3,NOX4,E2F7,DNA2,RAD51AP1,CDK1,BRCA1,PRIM2,CDC7,GINS1,AURKB,DBF4,EYA1,DSCC1,NEK2,DBF4B,APLF,RBBP8,RAD51,E2F8,FOXM1
GO:BP	synaptic signaling	GO:0099536	0.011294	1.94715	781	1149	73	21110	NALCN,FRRS1L,PDE7B,PTPRN2,TSHZ3,AMPH,DTNA,MAP1B,CADPS2,RELN,ERC2,SLC38A1,CACNB2,KCNN2,MCTP1,PTPRD,SYT7,RASGRF2,STXBP5,GJC1,LAMA2,GUCY1B1,HCN1,WNT5A,KCNMB4,AKAP12,ASIC2,EZH2,GLRA2,SLC8A3,CACNA1A,RPH3AL,STXBP5L,CHRNA5,SNCG,SNCA,INA,SHISA9,SYN3,SLC18A2,RIMS1,DLGAP2,DISC1,PRKAR2B,NR3C1,GUCY1A1,SERPINE2,SHISA6,NSG1,SYT4,CDC20,RPS6KA2,PRKCE,RIMS2,NETO2,FGF12,CACNG8,DKK1,TMEM108,RIT2,GABRA2,IGSF11,RIC3,…
GO:BP	mitotic DNA integrity checkpoint signaling	GO:0044774	0.0113264	1.94591	89	779	14	21110	DTL,CHEK1,MAP3K20,BLM,CDK1,GTSE1,PBK,BRCA1,FANCD2,CLSPN,CHEK2,TICRR,CDC6,RFWD3
GO:BP	atrial cardiac muscle cell action potential	GO:0086014	0.0114376	1.94166	18	881	7	21110	CACNB2,KCNN2,GJC1,CACNA1C,KCNJ3,ANK2,SCN5A
GO:BP	atrial cardiac muscle cell to AV node cell communication	GO:0086066	0.0114376	1.94166	18	881	7	21110	CACNB2,KCNN2,GJC1,CACNA1C,KCNJ3,ANK2,SCN5A
GO:BP	atrial cardiac muscle cell to AV node cell signaling	GO:0086026	0.0114376	1.94166	18	881	7	21110	CACNB2,KCNN2,GJC1,CACNA1C,KCNJ3,ANK2,SCN5A
GO:BP	multicellular organism reproduction	GO:0032504	0.0116308	1.93439	947	982	75	21110	ROBO2,MDK,LGR5,CFAP47,SPAG17,ADGB,BRIP1,CFAP54,CYP1B1,ZBTB16,NRIP1,LZTFL1,NR2F2,BRCA2,CXADR,CFAP69,SLIT2,PACRG,PAM,FMN2,TEX15,CFAP206,ACSL4,SPEF2,JAM3,SHB,CNTRL,KNL1,ASPM,TOP2A,NDC80,CDC25C,KIF18A,TTK,RACGAP1,FANCD2,MYBL1,MASTL,HMGB2,FANCA,FBXO5,CFAP221,CFAP43,ODF2,MCM8,UCHL1,DMC1,TSGA10,CSMD1,SPAG16,NR3C1,SERPINE2,SHISA6,BCL2,PTTG1,PMFBP1,MAST2,PYGO1,NDC1,ROPN1L,RPS6KA2,ASF1B,NCAPH,CCNB2,AURKA,T…
GO:BP	cell communication	GO:0007154	0.0137314	1.86229	6604	857	328	21110	ADGRB3,ROBO2,MDK,PLEKHG1,ESRRG,LGR5,HHIP,AHI1,PTPRO,PTPRM,MYO16,ADGRV1,TENM3,ADAMTS3,MAGI3,PLXNC1,EPHA6,NALCN,GFRA1,DCDC1,ARHGAP6,FRRS1L,PDE7B,EGFR,GNAI1,TBX5,PRAG1,S1PR3,PTPRN2,CTNNA3,TSHZ3,BRIP1,PRKAA2,CALCRL,CYP1B1,FBN1,PLEKHG4B,AMPH,DTNA,ANK3,MAP1B,CDS1,VRK2,CA8,LEF1,PKP4,RGS22,SPSB4,DOK5,CHST11,EFNA5,LRP2,FBN2,CADPS2,CDH6,BOC,GPC6,RELN,LTBP1,CPE,ERC2,DAPL1,LPAR1,ZIC1,SLC38A1,FRAS1,PDE4D,NR2F…
GO:BP	regulation of cellular component biogenesis	GO:0044087	0.0145997	1.83566	971	653	56	21110	ADGRB3,ROBO2,SLF1,PDLIM5,ARHGAP6,SYNPO2,ADD3,TBX5,PRKAA2,CLRN1,CEP135,MAP1B,EFNA5,GPC6,LPAR1,MYO3A,GPC4,KANK1,LDB2,PTPRD,ARHGAP24,SLIT2,TBX20,TENM1,STXBP5,DCDC2,COTL1,WNT5A,NEGR1,ASIC2,JAM3,PHLDB2,SMAD3,KIF15,ECT2,KIF14,ANLN,KIF24,PLK4,STIL,CKAP5,BRCA1,CENPJ,SYNE2,LRFN5,TRAF3IP1,CARMIL1,PRKD1,FBXL2,ODF2,PPM1E,STMN2,GAP43,KANK4,TMSB10,SNCA
GO:BP	microtubule polymerization or depolymerization	GO:0031109	0.0146491	1.83419	129	1144	21	21110	MAP1B,TPX2,KIF18A,KIF24,CKAP2,SKA3,CEP192,CKAP5,KIF18B,CENPJ,FBXO5,SKA2,STMN2,TUBA1A,SNCA,NEDD1,KIF2C,SKA1,MZT1,NDE1,PSRC1
GO:BP	locomotion	GO:0040011	0.0147433	1.8314	1365	422	52	21110	CNTN5,ROBO2,MDK,PTPRO,PALLD,PTPRM,ANOS1,PLXNC1,EPHA6,SYNPO2,EGFR,TBX5,PRAG1,PRTG,CYP1B1,LEF1,EFNA5,BOC,RELN,LPAR1,LHX9,SEMA3D,ALCAM,RRAS2,NR2F2,FUT9,CXADR,CFAP69,KANK1,ST6GAL1,KIF5C,MCTP1,LDB2,PTPRD,KITLG,SPARC,SLIT2,FGF19,DOCK4,PLXNA4,ONECUT2,ITGA9,CFAP206,LAMA2,TAFA4,ATOH7,WNT5A,ONECUT1,AKAP12,JAM3,PHLDB2,SMAD3
GO:BP	regulation of neuron projection development	GO:0010975	0.0153154	1.81487	449	271	19	21110	ADGRB3,ROBO2,MDK,TOX,PDLIM5,PTPRO,TENM3,PLXNC1,PRAG1,MAP1B,EFNA5,RELN,LPAR1,NR2F1,SEMA3D,FUT9,KANK1,PTPRD,SLIT2
GO:BP	positive regulation of cell projection organization	GO:0031346	0.0184661	1.73363	353	737	30	21110	ROBO2,MDK,TOX,TENM3,PLXNC1,CLRN1,CEP135,MAP1B,EFNA5,RELN,MYO3A,FUT9,PTPRD,SLIT2,TENM1,PLXNA4,ATOH7,WNT5A,NEGR1,EZH2,ANLN,CENPJ,CARMIL1,PRKD1,ROBO1,STMN2,PLPPR5,DISC1,ITGA6,CREB3L2
GO:BP	regulation of signal transduction	GO:0009966	0.0194497	1.71109	3003	854	167	21110	ROBO2,MDK,PLEKHG1,LGR5,HHIP,PTPRO,ADGRV1,ADAMTS3,MAGI3,ARHGAP6,FRRS1L,EGFR,GNAI1,PRAG1,PRKAA2,CYP1B1,FBN1,PLEKHG4B,VRK2,LEF1,RGS22,DOK5,CHST11,LRP2,FBN2,GPC6,RELN,LTBP1,LPAR1,ZIC1,PDE4D,NPFFR2,PRLR,PDE10A,HELLS,ATAD5,BRCA2,CHEK1,GPC4,KANK1,ZNF423,PAWR,PTPRD,IGFBPL1,KITLG,ARHGAP24,SLIT2,DOK6,TBX20,TENM1,RASGRF2,FGF19,RBPMS,BCAR3,RPS6KA6,DCDC2,RGS20,NUAK1,NOX4,GHR,IL17RD,ONECUT2,LRRIQ1,MGLL,LAMA2,T…
GO:BP	microtubule-based transport	GO:0099111	0.0202136	1.69436	211	1062	27	21110	AGBL4,DNAH11,SPAG17,CFAP54,MAP1B,LCA5,KIF5C,DNAI1,SPEF2,SYNE2,KIF4A,CFAP221,CFAP43,TRAF3IP1,TUBA1A,UCHL1,SPAG16,JHY,ROPN1L,CCDC39,DNAH9,NME5,WDPCP,NEK10,CCDC40,TMEM108,NDE1
GO:BP	gamete generation	GO:0007276	0.0206986	1.68406	783	899	60	21110	MDK,LGR5,CFAP47,SPAG17,ADGB,BRIP1,CFAP54,ZBTB16,NRIP1,LZTFL1,BRCA2,CXADR,CFAP69,PACRG,FMN2,TEX15,CFAP206,SPEF2,JAM3,SHB,CNTRL,KNL1,ASPM,TOP2A,NDC80,CDC25C,KIF18A,TTK,RACGAP1,FANCD2,MYBL1,MASTL,HMGB2,FANCA,FBXO5,CFAP221,CFAP43,ODF2,MCM8,UCHL1,DMC1,TSGA10,SPAG16,SHISA6,BCL2,PTTG1,PMFBP1,MAST2,PYGO1,NDC1,ROPN1L,RPS6KA2,ASF1B,NCAPH,CCNB2,AURKA,CCNA1,TDRD9,TSPAN8,TAF4B
GO:BP	protein localization to chromosome, centromeric region	GO:0071459	0.0233745	1.63126	43	525	8	21110	KNTC1,MTBP,KNL1,NDC80,BUB1B,CDK1,TTK,AURKB
GO:BP	actin cytoskeleton organization	GO:0030036	0.0236032	1.62703	731	473	36	21110	MDK,SHROOM3,PDLIM5,UTRN,PALLD,ARHGAP6,SYNPO2,ADD3,CTNNA3,EPB41L3,DIAPH3,CLRN1,EFNA5,LPAR1,IQGAP2,MYO3A,ELMO1,CXADR,KANK1,PAWR,WASF3,PLEKHH2,SLIT2,TENM1,PAM,FMN2,WIPF1,COTL1,NRK,MYO5C,JAM3,PHLDB2,SMAD3,ECT2,ANLN,CIT
GO:BP	regulation of synapse organization	GO:0050807	0.0244536	1.61166	240	1225	32	21110	ADGRB3,ROBO2,PDLIM5,PTPRO,PLXNC1,EFNA5,GPC6,RELN,GPC4,PTPRD,WNT5A,NEGR1,ASIC2,TUBB,LRFN5,PPFIA2,TUBA1A,SNCA,DISC1,CDC20,FLRT2,MUSK,SLIT1,LRRTM3,DKK1,TLR2,MDGA1,ST8SIA2,HOMER1,ABHD17B,KIF1A,DNM3
GO:BP	receptor localization to synapse	GO:0097120	0.0249913	1.60221	69	1095	14	21110	CEP112,GPC6,RELN,GPC4,KIF5C,ANKS1B,ERBB4,ADAM22,SHISA6,NSG1,GRIP1,NETO2,CACNG8,IQSEC2
GO:BP	cardiac muscle cell contraction	GO:0086003	0.0269633	1.56923	72	1204	15	21110	CTNNA3,PDE4D,CACNB2,DSG2,KCNN2,GJC1,CACNA1C,CACNA2D1,KCNJ3,DSC2,ANK2,SCN5A,FGF12,DSP,PKP2
GO:BP	protein phosphorylation	GO:0006468	0.0276484	1.55833	1547	967	107	21110	PTPRO,EPHA6,GFRA1,SYNPO2,EGFR,PRAG1,PRKAA2,VRK2,EFNA5,RELN,PDE4D,NPFFR2,CAMK4,KSR2,PRLR,STK32B,NEK5,MYO3A,NR2F2,CHEK1,KITLG,SLIT2,TENM1,FGF19,RBPMS,PKIA,BCAR3,RPS6KA6,NUAK1,NOX4,GHR,MAST4,WNT5A,MAP3K20,NRK,DOCK3,CDKL2,SHB,EZH2,MELK,BLM,VRK1,ECT2,KIF14,TPX2,CDC25C,CIT,CDK1,PLK4,BUB1,CENPE,TTK,PBK,CDC7,NCAPG2,MASTL,AURKB,PDE8A,CLSPN,CHEK2,SLC8A3,SLCO3A1,GADD45A,TRAF3IP1,PRKD1,CCNB1,ERBB4,PPM1E,ROBO…
GO:BP	meiotic spindle assembly	GO:0090306	0.0282946	1.5483	9	847	5	21110	ASPM,NDC80,FBXO5,CCNB2,AURKA
GO:BP	olfactory bulb interneuron development	GO:0021891	0.0291659	1.53512	6	636	4	21110	ROBO2,SLIT2,WNT5A,ROBO1
GO:BP	negative regulation of cellular process	GO:0048523	0.0291686	1.53508	4753	875	250	21110	ROBO2,MDK,AGBL4,HHIP,AHI1,PTPRO,MEIS1,PTPRM,MYO16,ADGRV1,PLXNC1,ARHGAP6,EGFR,ADD3,TBX5,CP,PRAG1,S1PR3,TSHZ3,PRTG,BRIP1,PRKAA2,CYP1B1,FBN1,ZBTB16,ANK3,MAP1B,ZFHX3,TMEM178A,LEF1,RGS22,CHST11,EFNA5,LRP2,FBN2,NRIP1,LTBP1,DAPL1,LPAR1,PDE4D,NR2F1,LHX9,HMX1,TRPS1,LZTFL1,SEMA3D,PRLR,CPEB1,PDE10A,JAZF1,NR2F2,HELLS,KNTC1,ATAD5,DTL,BRCA2,XRCC2,NSD2,POLQ,CHEK1,CXADR,SH3GL3,KANK1,CERKL,ST6GAL1,ZNF423,PAWR,MCT…
GO:BP	camera-type eye development	GO:0043010	0.0299123	1.52415	351	107	10	21110	MAN2A1,AHI1,MEIS1,PTPRM,TENM3,FOXN4,EGFR,SDK1,CYP1B1,FBN1
GO:BP	positive regulation of cellular process	GO:0048522	0.0307999	1.51145	5615	857	283	21110	ADGRB3,ROBO2,MDK,ESRRG,LGR5,TOX,MAN2A1,SLF1,AHI1,MEIS1,UTRN,ADGRV1,TENM3,ADAMTS3,PLXNC1,EPHA6,NALCN,RFC3,NEAT1,GFRA1,FOXN4,SYNPO2,EGFR,GNAI1,TBX5,PRAG1,S1PR3,TSHZ3,PRKAA2,CLRN1,CALCRL,CYP1B1,ZBTB16,CEP135,ANK3,MAP1B,CDS1,ZFHX3,LEF1,KIF26B,PKP4,DOK5,EFNA5,LRP2,FBN2,NPAS3,CADPS2,BOC,NRIP1,RELN,ERC2,LPAR1,ZIC1,SLC38A1,NR2F1,CACNB2,CAMK4,CPNE5,SEMA3D,PRLR,CPEB1,RAD51B,MYO3A,NMD3,RRAS2,NR2F2,ATAD5,DTL…
GO:BP	maintenance of protein location in extracellular region	GO:0071694	0.0313545	1.5037	7	152	3	21110	FBN1,FBN2,LTBP1
GO:BP	cilium movement involved in cell motility	GO:0060294	0.0328521	1.48344	150	368	12	21110	DNAH11,CFAP47,TEKT1,CFAP54,LZTFL1,CFAP69,RSPH9,ENKUR,TTLL9,DNAI1,CFAP206,SPEF2
GO:BP	mitotic DNA damage checkpoint signaling	GO:0044773	0.0338488	1.47046	85	779	13	21110	DTL,CHEK1,MAP3K20,BLM,CDK1,GTSE1,PBK,BRCA1,FANCD2,CLSPN,CHEK2,TICRR,RFWD3
GO:BP	olfactory bulb development	GO:0021772	0.0345526	1.46152	34	950	9	21110	ROBO2,ZIC1,SLIT2,WNT5A,KIF14,ERBB4,ROBO1,SALL1,SLIT1
GO:BP	mitotic G2/M transition checkpoint	GO:0044818	0.0346227	1.46064	51	776	10	21110	DTL,CHEK1,BLM,CDK1,BARD1,BRCA1,CLSPN,TICRR,RBBP8,CDC6
GO:BP	negative regulation of synapse assembly	GO:0051964	0.0348666	1.45759	8	1036	5	21110	ROBO2,WNT5A,SLIT1,DKK1,TLR2
GO:BP	action potential	GO:0001508	0.0356222	1.44828	144	1081	21	21110	CTNNA3,ANK3,CACNB2,DSG2,CXADR,KCNN2,SCN7A,GJC1,HCN1,CACNA1C,KCNMB4,USP53,CACNA2D1,KCNJ3,DSC2,ANK2,SCN5A,FGF12,DSP,KCNMB2,CHRNB4
GO:BP	regulation of transferase activity	GO:0051338	0.0379021	1.42134	860	1023	70	21110	PTPRO,EPHA6,RFC3,SYNPO2,EGFR,RELN,NPFFR2,PRLR,NR2F2,LDB2,KITLG,TENM1,PKIA,NOX4,GHR,WNT5A,DOCK3,SHB,EZH2,BLM,ECT2,KIF14,TPX2,CDC25C,BUB1B,CENPE,RBL1,PRIM2,GINS1,NCAPG2,MASTL,AURKB,CLSPN,FBXO5,SLC8A3,GADD45A,PRKD1,CCNB1,ERBB4,PPM1E,ROBO1,UCHL1,SNCA,DSCC1,NEK2,BORA,PRKAR2B,CAMKK1,TNFRSF10B,CDC6,CDC20,IQGAP1,CDKN3,INCENP,UBE2C,CCNB2,PIF1,MAD2L1,STOX1,CCNA2,CCNA1,AGTR1,CD24,MUSK,NEK10,CCNF,PLK1,DKK1,U…
GO:BP	phosphorylation	GO:0016310	0.0393026	1.40558	1787	1051	128	21110	PTPRO,EPHA6,GFRA1,SYNPO2,EGFR,PRAG1,PRKAA2,VRK2,EFNA5,RELN,PDE4D,NPFFR2,CAMK4,KSR2,PRLR,STK32B,NEK5,MYO3A,NR2F2,CHEK1,CERKL,LDB2,KITLG,SLIT2,TENM1,FGF19,RBPMS,PKIA,BCAR3,RPS6KA6,NUAK1,NOX4,GHR,MAST4,WNT5A,AK7,MAP3K20,NRK,DOCK3,CDKL2,SHB,EZH2,MELK,BLM,VRK1,ECT2,KIF14,TPX2,CDC25C,BUB1B,CIT,CDK1,PLK4,BUB1,CENPE,TTK,PBK,BARD1,RBL1,CDC7,NCAPG2,MASTL,AURKB,PDE8A,CLSPN,CHEK2,SLC8A3,XYLB,SLCO3A1,GADD45A,…
GO:BP	signaling	GO:0023052	0.0399667	1.3983	6493	857	320	21110	ADGRB3,ROBO2,MDK,PLEKHG1,ESRRG,LGR5,HHIP,AHI1,PTPRO,PTPRM,MYO16,ADGRV1,TENM3,ADAMTS3,MAGI3,PLXNC1,EPHA6,NALCN,GFRA1,DCDC1,ARHGAP6,FRRS1L,PDE7B,EGFR,GNAI1,TBX5,PRAG1,S1PR3,PTPRN2,TSHZ3,BRIP1,PRKAA2,CALCRL,CYP1B1,FBN1,PLEKHG4B,AMPH,DTNA,ANK3,MAP1B,CDS1,VRK2,CA8,LEF1,PKP4,RGS22,SPSB4,DOK5,CHST11,EFNA5,LRP2,FBN2,CADPS2,CDH6,BOC,GPC6,RELN,LTBP1,CPE,ERC2,DAPL1,LPAR1,ZIC1,SLC38A1,PDE4D,NR2F1,NPFFR2,CACN…
GO:BP	regulation of synapse structure or activity	GO:0050803	0.0406942	1.39047	246	1225	32	21110	ADGRB3,ROBO2,PDLIM5,PTPRO,PLXNC1,EFNA5,GPC6,RELN,GPC4,PTPRD,WNT5A,NEGR1,ASIC2,TUBB,LRFN5,PPFIA2,TUBA1A,SNCA,DISC1,CDC20,FLRT2,MUSK,SLIT1,LRRTM3,DKK1,TLR2,MDGA1,ST8SIA2,HOMER1,ABHD17B,KIF1A,DNM3
GO:BP	developmental growth	GO:0048589	0.0436793	1.35972	655	815	48	21110	MDK,PDLIM5,TBX5,MAP1B,KIF26B,CHST11,EFNA5,CPNE5,SEMA3D,PRLR,ALCAM,RAD51B,BRCA2,XRCC2,CHEK1,CXADR,SLIT2,TBX20,SYT17,RASAL2,GHR,PLXNA4,WNT5A,SMAD3,EZH2,ASPM,CDK1,STIL,GINS1,NCAPG2,LGR6,KIAA0319,DCX,ERBB4,GAP43,CLIC4,TMEM38B,DRAXIN,RIMS1,DISC1,BCL2,NPY1R,RMI1,SYT4,SALL1,TGFBR3,CPQ,IQGAP1
GO:BP	eye development	GO:0001654	0.0443501	1.35311	404	141	12	21110	MAN2A1,AHI1,MEIS1,PTPRM,TENM3,FOXN4,EGFR,SDK1,CYP1B1,FBN1,CPAMD8,FBN2
GO:BP	regulation of actin filament-based process	GO:0032970	0.0469673	1.3282	408	473	24	21110	MDK,ARHGAP6,SYNPO2,ADD3,CTNNA3,EFNA5,LPAR1,PDE4D,IQGAP2,DSG2,MYO3A,KANK1,WASF3,PLEKHH2,SLIT2,TENM1,PAM,COTL1,CACNA1C,JAM3,PHLDB2,SMAD3,ECT2,CIT
GO:BP	visual system development	GO:0150063	0.0488767	1.3109	408	141	12	21110	MAN2A1,AHI1,MEIS1,PTPRM,TENM3,FOXN4,EGFR,SDK1,CYP1B1,FBN1,CPAMD8,FBN2
GO:CC	cytoskeleton	GO:0005856	8.2987e-33	32.081	2412	1013	246	22122	KIAA1217,FIGN,AGBL4,SHROOM3,DNAH11,CFAP47,SLF1,PDLIM5,AHI1,UTRN,PALLD,DNAH14,MYO16,FRMD4B,SPAG17,TEKT1,DCDC1,ARHGAP6,SYNPO2,GNAI1,ADD3,HYDIN,FBXL7,CTNNA3,TEX9,CEP112,EPB41L3,DIAPH3,CLRN1,CFAP54,SCLT1,AMPH,DTNA,CEP135,ANK3,MAP1B,KIF26B,LCA5,CEP128,PKP4,RGS22,ERC2,PDE4D,NPFFR2,IQGAP2,LZTFL1,MYO3A,PPP2R2B,KNTC1,DTL,BRCA2,XRCC2,CHEK1,KANK1,KATNAL2,PAWR,WASF3,KIF5C,TTC29,CFAP61,MAP7,PLEKHH2,RSPH9,KITL…
GO:CC	microtubule cytoskeleton	GO:0015630	7.52859e-30	29.1233	1392	854	152	22122	KIAA1217,FIGN,AGBL4,SHROOM3,DNAH11,SLF1,AHI1,DNAH14,SPAG17,TEKT1,DCDC1,GNAI1,FBXL7,TEX9,CEP112,CLRN1,SCLT1,CEP135,MAP1B,KIF26B,LCA5,CEP128,PKP4,PDE4D,IQGAP2,LZTFL1,KNTC1,DTL,BRCA2,XRCC2,CHEK1,KATNAL2,KIF5C,MAP7,PACRG,ENKUR,FMN2,TTLL9,DCDC2,CEP126,DNAI1,NUAK1,ANKS1B,CFAP206,LRRIQ1,SPEF2,TTLL7,DNAH7,CDKL2,CNTRL,KIF15,KIF11,NUSAP1,ASPM,TOP2A,NDC80,KIF20B,GEN1,CCDC18,ECT2,KIF14,TPX2,BUB1B,KIF18A,KIF2…
GO:CC	spindle	GO:0005819	5.22489e-20	19.2819	434	850	67	22122	DCDC1,CEP128,PKP4,KNTC1,KATNAL2,FMN2,DCDC2,CNTRL,KIF15,KIF11,NUSAP1,ASPM,KIF20B,ECT2,KIF14,TPX2,BUB1B,KIF18A,KIF23,CDK1,CKAP2,CENPF,PLK4,SKA3,SGO1,CKAP5,CENPE,TTK,KIFC1,KIF18B,RACGAP1,CKAP2L,CDC7,AURKB,RAD21,TUBB,TACC3,PRC1,KIF4A,DLGAP5,FBXO5,SHCBP1,SKA2,CCNB1,ODF2,TUBB3,SNCG,NEK2,BORA,NR3C1,KIF20A,CDC6,NEDD1,CDC20,RPS6KA2,CDCA8,KIF2C,ESPL1,BIRC5,WDR62,INCENP,GPSM2,FAM83D,HMMR,AURKA,POC1A,MAD2L1
GO:CC	condensed chromosome	GO:0000793	4.34734e-19	18.3618	277	850	52	22122	SLF1,ADD3,CENPK,KNTC1,BRCA2,CHEK1,MTBP,SMC4,KNL1,NCAPG,TOP2A,MKI67,NDC80,BLM,NUF2,CENPI,BUB1B,KIF18A,CENPF,SKA3,BUB1,SGO1,CKAP5,CENPE,TTK,SMC2,CENPU,BRCA1,FANCD2,NCAPG2,AURKB,RAD21,HMGB2,SGO2,CENPO,NCAPD3,SKA2,CCNB1,TUBA1A,DMC1,NEK2,SYCP2L,RAD51,HJURP,KIF2C,BIRC5,SPC24,NCAPD2,CENPN,INCENP,NCAPH,MAD2L1
GO:CC	microtubule organizing center	GO:0005815	5.92659e-18	17.2272	852	1292	122	22122	KIAA1217,FIGN,AGBL4,SLF1,AHI1,GNAI1,FBXL7,TEX9,CEP112,SCLT1,CEP135,LCA5,CEP128,PDE4D,DTL,BRCA2,XRCC2,CHEK1,KATNAL2,TTLL9,DCDC2,CEP126,DNAI1,ANKS1B,CFAP206,CDKL2,CNTRL,KIF15,ASPM,TOP2A,NDC80,KIF20B,GEN1,CCDC18,ECT2,BUB1B,KIF18A,KIF23,KIF24,CDK1,CKAP2,CENPF,PLK4,STIL,SKA3,CEP192,SGO1,CKAP5,KIFC1,CKAP2L,CENPU,BRCA1,CEP152,CENPJ,RAD18,RTTN,MASTL,AURKB,TACC3,DLGAP5,PCLAF,KIAA0586,CDC45,CEP78,DEUP1,TRA…
GO:CC	chromosome, centromeric region	GO:0000775	6.13219e-16	15.2124	256	850	46	22122	MIS18BP1,CENPK,HELLS,KNTC1,MTBP,EZH2,SMC4,KNL1,NCAPG,TOP2A,NDC80,NUF2,CENPI,BUB1B,KIF18A,CENPF,SKA3,BUB1,SGO1,CKAP5,CENPE,TTK,CENPU,CENPP,AURKB,RAD21,ESCO2,SGO2,CENPO,NCAPD3,SKA2,OIP5,CCNB1,DSCC1,NEK2,SYCP2L,CENPL,HJURP,CDCA8,KIF2C,BIRC5,SPC24,NCAPD2,CENPN,INCENP,MAD2L1
GO:CC	centrosome	GO:0005813	9.78784e-16	15.0093	645	1027	85	22122	KIAA1217,SLF1,AHI1,GNAI1,FBXL7,TEX9,CEP112,SCLT1,CEP135,CEP128,DTL,BRCA2,XRCC2,CHEK1,DCDC2,CEP126,DNAI1,ANKS1B,CDKL2,CNTRL,KIF15,ASPM,NDC80,KIF20B,GEN1,CCDC18,KIF23,KIF24,CDK1,CKAP2,CENPF,PLK4,STIL,SKA3,CEP192,SGO1,CKAP5,CKAP2L,CENPU,CEP152,CENPJ,RAD18,RTTN,MASTL,AURKB,TACC3,DLGAP5,PCLAF,KIAA0586,CDC45,CEP78,TRAF3IP1,CCNB1,ODF2,CCDC15,NEK2,CLIC4,SLC18A2,PSMA1,DISC1,PRKAR2B,NEDD1,CDC20,KIF2C,CEP55…
GO:CC	chromosomal region	GO:0098687	2.41106e-15	14.6178	396	850	57	22122	SLF1,MIS18BP1,CENPK,HELLS,KNTC1,BRCA2,CHEK1,MTBP,EZH2,SMC4,KNL1,NCAPG,TOP2A,NDC80,DNA2,RAD51AP1,BLM,NUF2,CENPI,BUB1B,KIF18A,CDK1,CENPF,SKA3,BUB1,SGO1,CKAP5,CENPE,TTK,CENPU,CENPP,AURKB,RAD21,ESCO2,SGO2,CENPO,CHEK2,NCAPD3,SKA2,OIP5,CCNB1,DMC1,DSCC1,NEK2,SYCP2L,RAD51,CENPL,HJURP,CDCA8,KIF2C,BIRC5,SPC24,NCAPD2,CENPN,INCENP,PIF1,MAD2L1
GO:CC	supramolecular complex	GO:0099080	2.6865e-14	13.5708	1411	663	102	22122	FIGN,SHROOM3,DNAH11,PDLIM5,PALLD,DNAH14,SPAG17,COL11A1,TEKT1,DCDC1,ARHGAP6,SYNPO2,DIAPH3,CENPK,PRKAA2,FBN1,ANK3,MAP1B,KIF26B,FBN2,LTBP1,IQGAP2,CPEB1,MYO3A,KNTC1,KATNAL2,PAWR,KIF5C,KCNN2,MAP7,PACRG,RBPMS,SIMC1,ENKUR,FMN2,MTBP,TTLL9,DCDC2,WIPF1,DNAI1,GHR,COTL1,CFAP206,ZC3H12B,CACNA1C,COL4A6,TTLL7,DNAH7,JAM3,SHB,KIF15,KIF11,KNL1,LMNB1,NUSAP1,ASPM,NDC80,KIF20B,NUF2,CENPI,KIF14,TPX2,BUB1B,KIF18A,KIF23…
GO:CC	microtubule	GO:0005874	3.26568e-14	13.486	478	864	62	22122	FIGN,SHROOM3,DNAH11,DNAH14,SPAG17,TEKT1,DCDC1,MAP1B,KIF26B,IQGAP2,KNTC1,KATNAL2,KIF5C,MAP7,PACRG,ENKUR,TTLL9,DCDC2,DNAI1,CFAP206,TTLL7,DNAH7,KIF15,KIF11,NUSAP1,ASPM,KIF20B,KIF14,TPX2,KIF18A,KIF23,KIF24,CDK1,CKAP2,SKA3,CKAP5,GTSE1,CENPE,KIFC1,KIF18B,RACGAP1,CENPJ,AURKB,TUBA1B,TUBB,PRC1,KIF4A,SKA2,ODF2,DCX,TUBB3,TUBA1A,NEK2,DISC1,KIF20A,DNAH6,IQGAP1,KIF2C,BIRC5,INCENP,AURKA,TEKT3
GO:CC	chromosome	GO:0005694	3.61956e-14	13.4413	1939	850	149	22122	ESRRG,ZFHX4,SLF1,MEIS1,RFC3,FOXN4,ADD3,TBX5,TSHZ3,MIS18BP1,CENPK,MMS22L,ZFHX3,NPAS3,NRIP1,LHX9,HMX1,TRPS1,RAD51B,HELLS,KNTC1,ATAD5,DTL,BRCA2,XRCC2,TMPO,NSD2,POLQ,CHEK1,TSIX,PAWR,TBX20,FANCB,ZRANB3,MTBP,RADX,ONECUT2,FANCM,ATOH7,ONECUT1,SMAD3,EZH2,SMC4,KNL1,NCAPG,NUSAP1,TOP2A,MKI67,NDC80,PARPBP,E2F7,DNA2,RAD51AP1,BLM,NUF2,CENPI,BUB1B,KIF18A,CDK1,CENPF,PLK4,SKA3,BUB1,NEIL3,SGO1,CKAP5,CENPE,TTK,SMC2,…
GO:CC	intracellular non-membrane-bounded organelle	GO:0043232	4.16673e-14	13.3802	6568	857	366	22122	KIAA1217,FIGN,AGBL4,ESRRG,MEG8,SHROOM3,DNAH11,ZFHX4,CFAP47,SLF1,PDLIM5,AHI1,MEIS1,UTRN,PALLD,DNAH14,PTPRM,MYO16,FRMD4B,SPAG17,RFC3,FOXN4,TEKT1,DCDC1,ARHGAP6,KCNQ1OT1,SYNPO2,GNAI1,ADD3,HYDIN,TBX5,FBXL7,CTNNA3,TEX9,TSHZ3,CEP112,EPB41L3,MIS18BP1,DIAPH3,CENPK,MMS22L,PRKAA2,CLRN1,CFAP54,SCLT1,AMPH,DTNA,CEP135,ANK3,MAP1B,ZFHX3,KIF26B,LCA5,CEP128,PKP4,RGS22,NPAS3,NRIP1,ERC2,PDE4D,NPFFR2,LHX9,CAMK4,HMX1,…
GO:CC	non-membrane-bounded organelle	GO:0043228	4.27445e-14	13.3691	6569	857	366	22122	KIAA1217,FIGN,AGBL4,ESRRG,MEG8,SHROOM3,DNAH11,ZFHX4,CFAP47,SLF1,PDLIM5,AHI1,MEIS1,UTRN,PALLD,DNAH14,PTPRM,MYO16,FRMD4B,SPAG17,RFC3,FOXN4,TEKT1,DCDC1,ARHGAP6,KCNQ1OT1,SYNPO2,GNAI1,ADD3,HYDIN,TBX5,FBXL7,CTNNA3,TEX9,TSHZ3,CEP112,EPB41L3,MIS18BP1,DIAPH3,CENPK,MMS22L,PRKAA2,CLRN1,CFAP54,SCLT1,AMPH,DTNA,CEP135,ANK3,MAP1B,ZFHX3,KIF26B,LCA5,CEP128,PKP4,RGS22,NPAS3,NRIP1,ERC2,PDE4D,NPFFR2,LHX9,CAMK4,HMX1,…
GO:CC	condensed chromosome, centromeric region	GO:0000779	1.72796e-13	12.7625	176	1109	40	22122	CENPK,KNTC1,MTBP,KNL1,NCAPG,NDC80,NUF2,CENPI,BUB1B,KIF18A,CENPF,SKA3,BUB1,SGO1,CKAP5,CENPE,TTK,CENPU,AURKB,SGO2,CENPO,NCAPD3,SKA2,CCNB1,NEK2,SYCP2L,HJURP,KIF2C,BIRC5,SPC24,NCAPD2,CENPN,INCENP,MAD2L1,SKA1,PLK1,KNSTRN,NDE1,CENPA,SPDL1
GO:CC	supramolecular polymer	GO:0099081	1.54234e-12	11.8118	1057	1277	126	22122	FIGN,SHROOM3,DNAH11,PDLIM5,PALLD,DNAH14,SPAG17,COL11A1,TEKT1,DCDC1,ARHGAP6,SYNPO2,DIAPH3,FBN1,ANK3,MAP1B,KIF26B,FBN2,LTBP1,IQGAP2,MYO3A,KNTC1,KATNAL2,PAWR,KIF5C,KCNN2,MAP7,PACRG,SIMC1,ENKUR,FMN2,TTLL9,DCDC2,WIPF1,DNAI1,COTL1,CFAP206,CACNA1C,COL4A6,TTLL7,DNAH7,JAM3,KIF15,KIF11,LMNB1,NUSAP1,ASPM,KIF20B,KIF14,TPX2,KIF18A,KIF23,KIF24,CDK1,CKAP2,SKA3,CKAP5,GTSE1,CENPE,KIFC1,KIF18B,RACGAP1,CENPJ,SYNE2,…
GO:CC	cell projection	GO:0042995	1.64031e-12	11.7851	2400	1149	211	22122	CNTN5,ROBO2,MDK,AGBL4,DNAH11,CFAP47,PDLIM5,HHIP,AHI1,PTPRO,UTRN,PALLD,DNAH14,PTPRM,FRMD4B,ADGRV1,TENM3,SPAG17,EPHA6,GFRA1,TEKT1,ADGB,EGFR,KIRREL3,HYDIN,CNTN3,CTNNA3,TSHZ3,EPB41L3,PRKAA2,CLRN1,CFAP54,SCLT1,ANK3,MAP1B,LCA5,CEP128,LRP2,BOC,RELN,KCNB2,ERC2,LPAR1,SLC38A1,IQGAP2,LZTFL1,SYNPR,CPNE5,ALCAM,CPEB1,MYO3A,CXADR,CFAP69,KANK1,ANO1,CERKL,RTN1,WASF3,KIF5C,KCNN2,TTC29,CFAP61,MAP7,PLEKHH2,RSPH9,KIT…
GO:CC	mitotic spindle	GO:0072686	1.71313e-12	11.7662	185	1013	38	22122	DCDC1,PKP4,DCDC2,CNTRL,KIF11,NUSAP1,ASPM,KIF20B,ECT2,TPX2,KIF18A,KIF23,CDK1,CKAP2,SKA3,CENPE,KIFC1,KIF18B,RACGAP1,CKAP2L,CDC7,AURKB,TUBB,TACC3,PRC1,TUBB3,CDC6,ESPL1,WDR62,GPSM2,FAM83D,AURKA,MAD2L1,CEP295,SKA1,NEXMIF,PLK1,KNSTRN
GO:CC	supramolecular fiber	GO:0099512	1.05202e-11	10.978	1048	1277	123	22122	FIGN,SHROOM3,DNAH11,PDLIM5,PALLD,DNAH14,SPAG17,COL11A1,TEKT1,DCDC1,ARHGAP6,SYNPO2,DIAPH3,FBN1,ANK3,MAP1B,KIF26B,FBN2,LTBP1,IQGAP2,MYO3A,KNTC1,KATNAL2,PAWR,KIF5C,KCNN2,MAP7,PACRG,SIMC1,ENKUR,FMN2,TTLL9,DCDC2,WIPF1,DNAI1,COTL1,CFAP206,CACNA1C,TTLL7,DNAH7,JAM3,KIF15,KIF11,LMNB1,NUSAP1,ASPM,KIF20B,KIF14,TPX2,KIF18A,KIF23,KIF24,CDK1,CKAP2,SKA3,CKAP5,GTSE1,CENPE,KIFC1,KIF18B,RACGAP1,CENPJ,SYNE2,AURKB,T…
GO:CC	polymeric cytoskeletal fiber	GO:0099513	1.58876e-11	10.7989	806	663	67	22122	FIGN,SHROOM3,DNAH11,PDLIM5,PALLD,DNAH14,SPAG17,TEKT1,DCDC1,ARHGAP6,DIAPH3,MAP1B,KIF26B,IQGAP2,MYO3A,KNTC1,KATNAL2,PAWR,KIF5C,MAP7,PACRG,ENKUR,FMN2,TTLL9,DCDC2,WIPF1,DNAI1,COTL1,CFAP206,TTLL7,DNAH7,JAM3,KIF15,KIF11,LMNB1,NUSAP1,ASPM,KIF20B,KIF14,TPX2,KIF18A,KIF23,KIF24,CDK1,CKAP2,SKA3,CKAP5,GTSE1,CENPE,KIFC1,KIF18B,RACGAP1,CENPJ,AURKB,TUBA1B,TUBB,PRC1,KIF4A,SKA2,CARMIL1,ODF2,DCX,TUBB3,TUBA1A,PRPH,…
GO:CC	spindle pole	GO:0000922	5.21713e-11	10.2826	174	1144	37	22122	CEP128,PKP4,KNTC1,KATNAL2,CNTRL,KIF11,ASPM,KIF20B,TPX2,CKAP2,CENPF,PLK4,SGO1,CKAP5,CKAP2L,AURKB,RAD21,TACC3,PRC1,DLGAP5,CCNB1,ODF2,NEK2,CDC6,NEDD1,CDC20,WDR62,GPSM2,FAM83D,AURKA,POC1A,MAD2L1,PLK1,KNSTRN,NDE1,SPDL1,PSRC1
GO:CC	kinetochore	GO:0000776	1.04821e-10	9.97955	165	1109	35	22122	CENPK,KNTC1,MTBP,KNL1,NDC80,NUF2,CENPI,BUB1B,KIF18A,CENPF,SKA3,BUB1,SGO1,CKAP5,CENPE,TTK,CENPU,AURKB,SGO2,CENPO,SKA2,CCNB1,NEK2,HJURP,KIF2C,BIRC5,SPC24,CENPN,INCENP,MAD2L1,SKA1,PLK1,KNSTRN,NDE1,SPDL1
GO:CC	plasma membrane bounded cell projection	GO:0120025	1.14599e-10	9.94082	2286	1149	197	22122	CNTN5,ROBO2,AGBL4,DNAH11,CFAP47,HHIP,AHI1,PTPRO,UTRN,PALLD,DNAH14,PTPRM,FRMD4B,ADGRV1,TENM3,SPAG17,EPHA6,GFRA1,TEKT1,ADGB,EGFR,KIRREL3,HYDIN,CNTN3,CTNNA3,TSHZ3,EPB41L3,PRKAA2,CLRN1,CFAP54,SCLT1,ANK3,MAP1B,LCA5,CEP128,LRP2,BOC,RELN,KCNB2,ERC2,LPAR1,SLC38A1,IQGAP2,LZTFL1,SYNPR,CPNE5,ALCAM,CPEB1,MYO3A,CXADR,CFAP69,KANK1,CERKL,RTN1,WASF3,KIF5C,KCNN2,TTC29,CFAP61,MAP7,PLEKHH2,RSPH9,KITLG,ALDH1A1,TENM1…
GO:CC	cytoplasmic region	GO:0099568	2.85707e-09	8.54408	286	1149	46	22122	AGBL4,DNAH11,DNAH14,SPAG17,TEKT1,GNAI1,HYDIN,CFAP54,LCA5,ERC2,KIF5C,CFAP61,RSPH9,PACRG,ENKUR,DCDC2,DNAI1,CFAP206,GUCY1B1,DNAH7,PHLDB2,CENPF,KIF4A,CFAP221,CFAP43,TRAF3IP1,CFAP74,DCX,UCHL1,AK8,SPAG16,RIMS1,CCDC39,DNAH6,GPSM2,TEKT3,RIMS2,DNAH9,WDPCP,TULP3,CCDC40,TMEM108,ABHD12,ARL13B,SAPCD2,PCLO
GO:CC	axoneme	GO:0005930	4.4228e-09	8.3543	158	978	30	22122	DNAH11,DNAH14,SPAG17,TEKT1,HYDIN,CFAP54,LCA5,CFAP61,RSPH9,PACRG,ENKUR,DCDC2,DNAI1,CFAP206,DNAH7,CENPF,CFAP221,CFAP43,TRAF3IP1,CFAP74,DCX,AK8,SPAG16,CCDC39,DNAH6,TEKT3,DNAH9,WDPCP,TULP3,CCDC40
GO:CC	ciliary plasm	GO:0097014	5.22528e-09	8.28189	159	978	30	22122	DNAH11,DNAH14,SPAG17,TEKT1,HYDIN,CFAP54,LCA5,CFAP61,RSPH9,PACRG,ENKUR,DCDC2,DNAI1,CFAP206,DNAH7,CENPF,CFAP221,CFAP43,TRAF3IP1,CFAP74,DCX,AK8,SPAG16,CCDC39,DNAH6,TEKT3,DNAH9,WDPCP,TULP3,CCDC40
GO:CC	outer kinetochore	GO:0000940	6.09902e-09	8.21474	16	1109	11	22122	NDC80,NUF2,BUB1B,CENPF,SKA3,SKA2,CCNB1,SPC24,SKA1,PLK1,SPDL1
GO:CC	cell junction	GO:0030054	7.64324e-09	8.11672	2230	1287	204	22122	ADGRB3,CNTN5,SHROOM3,PDLIM5,AHI1,PTPRO,UTRN,PALLD,PTPRM,FRMD4B,ADGRV1,MAGI3,PLXNC1,COL13A1,FRRS1L,PDE7B,SYNPO2,EGFR,SDK1,ADD3,KIRREL3,PRAG1,PTPRN2,CTNNA3,CEP112,EPB41L3,AMPH,DTNA,ANK3,MAP1B,PKP4,EFNA5,CADPS2,CDH6,GPC6,ERC2,LPAR1,LRRTM4,CACNB2,CAMK4,IFITM2,SYNPR,ALCAM,CPEB1,DSG2,RRAS2,FBLN7,CXADR,SH3GL3,GPC4,ANO1,WASF3,KCNN2,MCTP1,PTPRD,ALDH1A1,ARHGAP24,SYT7,BCAR3,STXBP5,ICA1,ANKS1B,NOX4,PLXNA4,MR…
GO:CC	microtubule associated complex	GO:0005875	2.52307e-08	7.59807	170	847	28	22122	DNAH11,DNAH14,MAP1B,KIF26B,KATNAL2,KIF5C,MAP7,DNAI1,DNAH7,KIF15,KIF11,KIF20B,KIF14,KIF18A,KIF23,KIFC1,KIF18B,AURKB,KIF4A,DCX,DISC1,KIF20A,DNAH6,CDCA8,KIF2C,BIRC5,INCENP,AURKA
GO:CC	spindle midzone	GO:0051233	5.73494e-08	7.24147	36	980	14	22122	PKP4,KIF20B,KIF14,KIF18A,CENPE,KIF18B,RACGAP1,AURKB,PRC1,CDC6,CDCA8,INCENP,AURKA,PLK1
GO:CC	condensed nuclear chromosome	GO:0000794	1.17524e-07	6.92987	82	980	20	22122	ADD3,BRCA2,CHEK1,SMC4,NCAPG,BLM,SMC2,BRCA1,NCAPG2,RAD21,NCAPD3,DMC1,NEK2,SYCP2L,RAD51,NCAPD2,INCENP,NCAPH,SYCP2,PLK1
GO:CC	midbody	GO:0030496	1.36416e-07	6.86513	207	847	30	22122	DCDC1,GNAI1,PKP4,CEP126,CNTRL,ASPM,KIF20B,ECT2,KIF14,ANLN,KIF23,CIT,CDK1,CENPF,CENPE,RACGAP1,AURKB,RAD21,PRC1,KIF4A,SHCBP1,NEK2,CLIC4,KIF20A,IQGAP1,CDCA8,CEP55,BIRC5,INCENP,AURKA
GO:CC	replication fork	GO:0005657	1.43906e-07	6.84192	72	573	15	22122	RFC3,MMS22L,RAD51B,XRCC2,CHEK1,ZRANB3,RADX,BLM,PRIM2,WDHD1,RAD18,MCM10,POLD3,UHRF1,POLA2
GO:CC	centriole	GO:0005814	2.18027e-07	6.66149	155	1027	28	22122	AGBL4,AHI1,SCLT1,CEP135,CEP128,TOP2A,KIF24,PLK4,STIL,CEP192,CEP152,CENPJ,RTTN,KIAA0586,CEP78,DEUP1,ODF2,TSGA10,NEDD1,CEP55,WDR62,AURKA,POC1A,CEP295,CCNF,PLK1,HYLS1,CEP76
GO:CC	condensin complex	GO:0000796	3.18632e-07	6.49671	8	841	7	22122	SMC4,NCAPG,SMC2,NCAPG2,NCAPD3,NCAPD2,NCAPH
GO:CC	plasma membrane bounded cell projection cytoplasm	GO:0032838	3.41084e-07	6.46714	248	1065	37	22122	AGBL4,DNAH11,DNAH14,SPAG17,TEKT1,HYDIN,CFAP54,LCA5,KIF5C,CFAP61,RSPH9,PACRG,ENKUR,DCDC2,DNAI1,CFAP206,DNAH7,CENPF,KIF4A,CFAP221,CFAP43,TRAF3IP1,CFAP74,DCX,UCHL1,AK8,SPAG16,CCDC39,DNAH6,TEKT3,DNAH9,WDPCP,TULP3,CCDC40,TMEM108,ABHD12,ARL13B
GO:CC	nuclear chromosome	GO:0000228	5.04763e-07	6.29691	233	841	31	22122	ADD3,MMS22L,BRCA2,CHEK1,ZRANB3,SMC4,NCAPG,TOP2A,BLM,SMC2,BRCA1,PRIM2,GINS1,WDHD1,POLE2,MCM10,NCAPG2,RAD21,POLD3,NCAPD3,POLA2,CDC45,DMC1,NEK2,SYCP2L,POLA1,RAD51,BIRC5,NCAPD2,INCENP,NCAPH
GO:CC	cilium	GO:0005929	5.40965e-07	6.26683	737	978	70	22122	AGBL4,DNAH11,CFAP47,HHIP,AHI1,DNAH14,SPAG17,TEKT1,ADGB,HYDIN,CFAP54,SCLT1,MAP1B,LCA5,CEP128,LZTFL1,CFAP69,CERKL,KIF5C,TTC29,CFAP61,RSPH9,PACRG,ENKUR,TTLL9,DCDC2,CEP126,DNAI1,ZBBX,CFAP206,SPEF2,AK7,TTLL7,DNAH7,CFAP300,CNTRL,CENPF,CENPJ,RTTN,KIAA0586,CFAP221,CDC45,CEP78,CFAP43,TRAF3IP1,CFAP74,ODF2,DCX,TSGA10,AK8,SPAG16,IQUB,DISC1,PRKAR2B,PMFBP1,NEDD1,ROPN1L,CCDC39,DNAH6,FANK1,TBC1D31,AURKA,POC1A,TE…
GO:CC	synapse	GO:0045202	6.85481e-07	6.164	1465	1149	129	22122	ADGRB3,CNTN5,PDLIM5,PTPRO,UTRN,PALLD,ADGRV1,PLXNC1,COL13A1,FRRS1L,PDE7B,SDK1,ADD3,KIRREL3,PTPRN2,CEP112,AMPH,DTNA,ANK3,MAP1B,PKP4,EFNA5,CADPS2,CDH6,GPC6,ERC2,LPAR1,LRRTM4,CACNB2,CAMK4,SYNPR,CPEB1,SH3GL3,GPC4,ANO1,WASF3,KCNN2,MCTP1,PTPRD,ALDH1A1,SYT7,STXBP5,ICA1,ANKS1B,PLXNA4,GJC1,LAMA2,GUCY1B1,HCN1,CACNA1C,WNT5A,KCNMB4,AKAP12,ASIC2,EZH2,GLRA2,SLC8A3,CACNA1A,RPH3AL,STXBP5L,LRFN5,CTNND2,CHRNA5,ERBB…
GO:CC	nucleoplasm	GO:0005654	3.21667e-06	5.49259	4203	855	229	22122	PLEKHG1,ESRRG,LGR5,SLF1,UTRN,MYO16,EPHA6,RFC3,NEAT1,SYNPO2,TBX5,TSHZ3,MIS18BP1,CENPK,BRIP1,MMS22L,PRKAA2,ZBTB16,DTNA,ZFHX3,LEF1,RALYL,NPAS3,CADPS2,CDH6,NRIP1,ZIC1,NR2F1,CAMK4,TRPS1,IFITM2,HIVEP2,CPEB1,RAD51B,NMD3,JAZF1,NR2F2,DTL,BRCA2,XRCC2,ATAD2,NSD2,POLQ,CHEK1,CXADR,ANO1,CERKL,ZNF423,LDB2,PLEKHH2,LIN28B,TENM1,EFCAB6,RBPMS,FANCB,ZRANB3,RPS6KA6,SH3BGRL2,RADX,AFF3,NUAK1,ANKS1B,IL17RD,ONECUT2,GREB1…
GO:CC	extracellular matrix	GO:0031012	5.61712e-06	5.25049	567	278	26	22122	COL25A1,MDK,COL9A1,COL23A1,ADAMTS3,ANOS1,COL11A1,COL13A1,FBN1,EFNA5,FBN2,PTPRQ,GPC6,RELN,LTBP1,LRRTM4,FRAS1,FBLN7,COL19A1,GPC4,EDIL3,COL6A6,FREM2,ADAM19,SPARC,COLEC12
GO:CC	external encapsulating structure	GO:0030312	5.82108e-06	5.235	568	278	26	22122	COL25A1,MDK,COL9A1,COL23A1,ADAMTS3,ANOS1,COL11A1,COL13A1,FBN1,EFNA5,FBN2,PTPRQ,GPC6,RELN,LTBP1,LRRTM4,FRAS1,FBLN7,COL19A1,GPC4,EDIL3,COL6A6,FREM2,ADAM19,SPARC,COLEC12
GO:CC	kinesin complex	GO:0005871	8.31333e-06	5.08023	50	820	13	22122	KIF26B,KIF5C,KIF15,KIF11,KIF20B,KIF14,KIF18A,KIF23,KIFC1,KIF18B,DISC1,KIF20A,KIF2C
GO:CC	procentriole replication complex	GO:0120099	1.40969e-05	4.85088	6	512	5	22122	PLK4,STIL,CEP192,CEP152,CENPJ
GO:CC	collagen-containing extracellular matrix	GO:0062023	2.91266e-05	4.53571	430	269	21	22122	COL25A1,MDK,COL9A1,COL23A1,ADAMTS3,COL11A1,COL13A1,FBN1,EFNA5,FBN2,PTPRQ,GPC6,LTBP1,FRAS1,COL19A1,GPC4,EDIL3,COL6A6,FREM2,ADAM19,SPARC
GO:CC	motile cilium	GO:0031514	3.43856e-05	4.46362	251	1145	35	22122	DNAH11,CFAP47,SPAG17,TEKT1,ADGB,CFAP69,TTC29,CFAP61,RSPH9,PACRG,ENKUR,TTLL9,DNAI1,ZBBX,CFAP206,SPEF2,AK7,CFAP300,CFAP221,CFAP43,ODF2,TSGA10,AK8,SPAG16,IQUB,PMFBP1,ROPN1L,TEKT3,DNAH9,NME5,ENO4,ARL13B,ANXA1,SPATA6L,SPA17
GO:CC	neuron to neuron synapse	GO:0098984	6.60717e-05	4.17998	383	1285	49	22122	ADGRB3,PDLIM5,PTPRO,PLXNC1,ADD3,MAP1B,PKP4,CPEB1,SH3GL3,PTPRD,SYT7,STXBP5,ANKS1B,PLXNA4,CACNA1C,SLC8A3,LRFN5,CTNND2,ERBB4,GAP43,CNKSR2,SHISA9,SYN3,ADAM22,DLGAP2,DISC1,SHISA6,CAP2,AURKA,GRIP1,FAM81A,SPTBN1,BAALC,NETO2,CACNG8,LRRTM3,PAK6,TMEM108,IGSF11,SYN2,GRM3,HOMER1,ITPR1,ABHD17B,PCLO,EPS8,DNM3,MAGI2,LYN
GO:CC	postsynaptic specialization	GO:0099572	8.22591e-05	4.08482	363	1285	47	22122	ADGRB3,PDLIM5,PTPRO,ADD3,MAP1B,PKP4,CPEB1,SH3GL3,ANKS1B,CACNA1C,SLC8A3,LRFN5,CTNND2,ERBB4,GAP43,CNKSR2,SHISA9,SYN3,ADAM22,DLGAP2,DISC1,CDH10,SHISA6,CAP2,AURKA,GRIP1,FAM81A,SPTBN1,BAALC,NETO2,CACNG8,LRRTM3,PAK6,TMEM108,GABRA2,IGSF11,SYN2,GRM3,HOMER1,ITPR1,ABHD17B,PCLO,EPS8,DNM3,MAGI2,GLRB,LYN
GO:CC	asymmetric synapse	GO:0032279	8.41934e-05	4.07472	352	1285	46	22122	ADGRB3,PDLIM5,PTPRO,PLXNC1,ADD3,MAP1B,PKP4,CPEB1,SH3GL3,ANKS1B,PLXNA4,CACNA1C,SLC8A3,LRFN5,CTNND2,ERBB4,GAP43,CNKSR2,SHISA9,SYN3,ADAM22,DLGAP2,DISC1,SHISA6,CAP2,AURKA,GRIP1,FAM81A,SPTBN1,BAALC,NETO2,CACNG8,LRRTM3,PAK6,TMEM108,IGSF11,SYN2,GRM3,HOMER1,ITPR1,ABHD17B,PCLO,EPS8,DNM3,MAGI2,LYN
GO:CC	postsynaptic density	GO:0014069	0.000170834	3.76742	338	1285	44	22122	ADGRB3,PDLIM5,PTPRO,ADD3,MAP1B,PKP4,CPEB1,SH3GL3,ANKS1B,CACNA1C,SLC8A3,LRFN5,CTNND2,ERBB4,GAP43,CNKSR2,SHISA9,SYN3,ADAM22,DLGAP2,DISC1,SHISA6,CAP2,AURKA,GRIP1,FAM81A,SPTBN1,BAALC,NETO2,CACNG8,LRRTM3,PAK6,TMEM108,IGSF11,SYN2,GRM3,HOMER1,ITPR1,ABHD17B,PCLO,EPS8,DNM3,MAGI2,LYN
GO:CC	chromosome passenger complex	GO:0032133	0.000173754	3.76006	6	847	5	22122	AURKB,CDCA8,BIRC5,INCENP,AURKA
GO:CC	neuron projection	GO:0043005	0.000193243	3.7139	1394	293	42	22122	CNTN5,ROBO2,AGBL4,PTPRO,PALLD,ADGRV1,TENM3,EPHA6,GFRA1,KIRREL3,CNTN3,TSHZ3,EPB41L3,PRKAA2,CLRN1,ANK3,MAP1B,LCA5,LRP2,BOC,RELN,KCNB2,ERC2,LPAR1,SLC38A1,SYNPR,CPNE5,ALCAM,CPEB1,MYO3A,CXADR,CERKL,RTN1,KIF5C,KCNN2,MAP7,RSPH9,ALDH1A1,TENM1,PACRG,SCN7A,PAM
GO:CC	postsynapse	GO:0098794	0.000195648	3.70853	665	1285	71	22122	ADGRB3,PDLIM5,PTPRO,UTRN,COL13A1,ADD3,ANK3,MAP1B,PKP4,LPAR1,LRRTM4,CAMK4,CPEB1,SH3GL3,WASF3,KCNN2,ANKS1B,HCN1,CACNA1C,WNT5A,ASIC2,GLRA2,SLC8A3,LRFN5,CTNND2,CHRNA5,ERBB4,PPFIA2,GAP43,CNKSR2,SNCA,INA,SHISA9,SYN3,ADAM22,DLGAP2,DISC1,PRKAR2B,CDH10,SHISA6,CAP2,ELAVL4,NSG1,AURKA,ANK2,GRIP1,FAM81A,MUSK,SPTBN1,BAALC,NETO2,CACNG8,LRRTM3,PAK6,TMEM108,GABRA2,IGSF11,CHRNB4,SYN2,GRM3,HOMER1,ITPR1,CHRNA7,ABHD1…
GO:CC	mitotic spindle midzone	GO:1990023	0.000198668	3.70187	14	543	6	22122	KIF20B,KIF18A,CENPE,KIF18B,AURKB,PRC1
GO:CC	meiotic spindle	GO:0072687	0.000212711	3.67221	15	847	7	22122	CNTRL,ASPM,FBXO5,BORA,RPS6KA2,INCENP,AURKA
GO:CC	cytoplasm	GO:0005737	0.000359914	3.4438	12365	1213	758	22122	PCDH7,KIAA1217,FIGN,COL25A1,MDK,PLEKHG1,AGBL4,SHROOM3,LGR5,DNAH11,MAN2A1,CFAP47,MAN1A1,SLF1,PDLIM5,HHIP,AHI1,CABLES1,UTRN,COL9A1,PALLD,CFAP299,DNAH14,PTPRM,COL23A1,MYO16,FRMD4B,ADGRV1,SPAG17,MAGI3,COL11A1,COL13A1,GFRA1,TEKT1,DCDC1,ARHGAP6,PDE7B,SYNPO2,EGFR,GNAI1,ADD3,KIRREL3,HYDIN,TBX5,CP,PRAG1,S1PR3,PTPRN2,FBXL7,CTNNA3,TEX9,DPYD,CEP112,EPB41L3,HMGCS1,DIAPH3,CENPK,BRIP1,MMS22L,PRKAA2,CLRN1,CFAP54…
GO:CC	lateral element	GO:0000800	0.000454031	3.34291	15	948	7	22122	BRCA2,BLM,BRCA1,SYCP2L,RAD51,INCENP,SYCP2
GO:CC	cell-cell junction	GO:0005911	0.000564368	3.24844	511	146	15	22122	SHROOM3,PDLIM5,AHI1,PTPRM,FRMD4B,MAGI3,COL13A1,ADD3,KIRREL3,CTNNA3,EPB41L3,ANK3,PKP4,EFNA5,CDH6
GO:CC	spindle microtubule	GO:0005876	0.000603769	3.21913	89	980	16	22122	KNTC1,KIF11,KIF18A,CDK1,SKA3,CENPE,KIF18B,AURKB,PRC1,KIF4A,SKA2,BIRC5,AURKA,CEP295,SKA1,PLK1
GO:CC	DNA packaging complex	GO:0044815	0.000990278	3.00424	33	841	9	22122	SMC4,NCAPG,SMC2,NCAPG2,RAD21,SGO2,NCAPD3,NCAPD2,NCAPH
GO:CC	collagen trimer	GO:0005581	0.00107647	2.968	93	644	13	22122	COL25A1,COL9A1,COL23A1,COL11A1,COL13A1,COL19A1,COL6A6,COLEC12,COL21A1,COL4A6,EMID1,EDA,COL5A2
GO:CC	cell periphery	GO:0071944	0.00119305	2.92334	6303	177	79	22122	PCDH7,ADGRB3,CNTN5,ROBO2,COL25A1,MDK,SHROOM3,LGR5,HHIP,PTPRO,UTRN,COL9A1,PALLD,PTPRM,COL23A1,MYO16,ADGRV1,TENM3,ADAMTS3,ANOS1,MAGI3,PLXNC1,EPHA6,KCNT2,COL11A1,NALCN,MDGA2,COL13A1,GFRA1,FRRS1L,EGFR,GNAI1,SDK1,ADD3,KIRREL3,CP,CNTN3,S1PR3,PTPRN2,NKAIN3,TSHZ3,PRTG,CEP112,EPB41L3,CLRN1,CALCRL,FBN1,ZBTB16,AMPH,DTNA,ANK3,MAP1B,PKP4,EFNA5,CPAMD8,LRP2,FBN2,PTPRQ,CDH6,BOC,GPC6,RELN,KCNB2,LTBP1,OPCML,CPE,ER…
GO:CC	adherens junction	GO:0005912	0.00127895	2.89315	182	146	9	22122	SHROOM3,PDLIM5,AHI1,PTPRM,FRMD4B,CTNNA3,PKP4,EFNA5,CDH6
GO:CC	axon	GO:0030424	0.00165914	2.78012	648	159	17	22122	CNTN5,ROBO2,AGBL4,PTPRO,PALLD,TENM3,GFRA1,KIRREL3,TSHZ3,EPB41L3,PRKAA2,ANK3,MAP1B,LRP2,BOC,ERC2,SLC38A1
GO:CC	anchoring junction	GO:0070161	0.0021476	2.66805	902	94	15	22122	SHROOM3,PDLIM5,AHI1,PALLD,PTPRM,FRMD4B,MAGI3,COL13A1,SYNPO2,EGFR,ADD3,KIRREL3,PRAG1,CTNNA3,EPB41L3
GO:CC	chromocenter	GO:0010369	0.00398189	2.39991	15	838	6	22122	AURKB,ESCO2,OIP5,SALL1,CDCA8,INCENP
GO:CC	centralspindlin complex	GO:0097149	0.00404492	2.39309	3	493	3	22122	ECT2,KIF23,RACGAP1
GO:CC	cell leading edge	GO:0031252	0.00426743	2.36983	425	113	11	22122	ROBO2,PTPRO,PALLD,PTPRM,FRMD4B,ADGRV1,EGFR,CTNNA3,EPB41L3,CLRN1,AMPH
GO:CC	procentriole	GO:0120098	0.00440014	2.35653	3	507	3	22122	PLK4,CEP192,CEP152
GO:CC	cell body	GO:0044297	0.00956017	2.01953	580	654	36	22122	GFRA1,PRKAA2,MAP1B,KCNB2,LPAR1,SLC38A1,CPNE5,ALCAM,CXADR,RTN1,KIF5C,KCNN2,PACRG,PAM,GHR,ATOH7,CACNA1C,NEGR1,TTLL7,AKAP12,ASIC2,TPX2,CIT,TUBB,SLC2A13,SLC8A3,CACNA1A,CTNND2,STMN2,GAP43,TUBB3,SNCG,UCHL1,CNKSR2,SNCA,PRPH
GO:CC	synaptic membrane	GO:0097060	0.0126243	1.89879	397	1169	41	22122	ADGRB3,CNTN5,PTPRO,UTRN,COL13A1,ANK3,ERC2,LPAR1,LRRTM4,KCNN2,PTPRD,SYT7,HCN1,CACNA1C,GLRA2,LRFN5,CHRNA5,ERBB4,CNKSR2,SHISA9,ADAM22,KCNJ3,RIMS1,SYDE2,CDH10,SHISA6,NSG1,ANK2,RIMS2,GRIP1,KCNK1,MUSK,NETO2,CACNG8,LRRTM3,GABRA2,CHRNB4,GRM3,CHRNA7,ABHD17B,ZNRF2
GO:CC	plasma membrane	GO:0005886	0.0143807	1.84222	5819	186	74	22122	PCDH7,ADGRB3,CNTN5,ROBO2,COL25A1,SHROOM3,LGR5,HHIP,PTPRO,UTRN,PALLD,PTPRM,COL23A1,MYO16,ADGRV1,TENM3,ANOS1,MAGI3,PLXNC1,EPHA6,KCNT2,NALCN,MDGA2,COL13A1,GFRA1,FRRS1L,EGFR,GNAI1,SDK1,ADD3,KIRREL3,CP,CNTN3,S1PR3,PTPRN2,NKAIN3,TSHZ3,PRTG,CEP112,EPB41L3,CLRN1,CALCRL,ZBTB16,AMPH,DTNA,ANK3,MAP1B,PKP4,EFNA5,CPAMD8,LRP2,CDH6,BOC,GPC6,RELN,KCNB2,OPCML,CPE,ERC2,LPAR1,SLC38A1,LRRTM4,FRAS1,CNTNAP3,PDE4D,NPFFR…
GO:CC	cell-cell contact zone	GO:0044291	0.0144701	1.83953	74	1204	14	22122	CTNNA3,ANK3,PKP4,DSG2,CXADR,GJC1,JAM3,DSC2,ANK2,AJAP1,SCN5A,TMEM65,DSP,PKP2
GO:CC	stereocilium bundle	GO:0032421	0.0150362	1.82286	63	329	7	22122	ADGRV1,CLRN1,PTPRQ,MYO3A,RSPH9,DCDC2,DOCK4
GO:CC	intercellular bridge	GO:0045171	0.0152714	1.81612	92	961	14	22122	KIF20B,TPX2,KIF23,CENPE,CDC7,TUBB,PRC1,TUBB3,KIF20A,CDC6,CDCA8,CEP55,FAM83D,SKA1
GO:CC	BRCA1-B complex	GO:0070532	0.0166951	1.77741	4	501	3	22122	BRIP1,BARD1,BRCA1
GO:CC	DNA polymerase complex	GO:0042575	0.016713	1.77694	20	773	6	22122	DNA2,PRIM2,POLE2,POLD3,POLA2,POLA1
GO:CC	glutamatergic synapse	GO:0098978	0.0224507	1.64877	433	1287	46	22122	ADGRB3,PTPRO,PLXNC1,CADPS2,CDH6,ERC2,LPAR1,CAMK4,SH3GL3,GPC4,WASF3,KCNN2,PTPRD,PLXNA4,GUCY1B1,HCN1,WNT5A,LRFN5,ERBB4,CNKSR2,SHISA9,SYN3,ADAM22,DLGAP2,DISC1,PRKAR2B,CDH10,GUCY1A1,SHISA6,ELAVL4,NSG1,SYT4,AURKA,FAM81A,SPTBN1,NETO2,LRRTM3,SYN2,GRM3,HOMER1,NRG3,PCLO,EPS8,DNM3,LYN,PPM1H
GO:CC	nuclear replication fork	GO:0043596	0.0224658	1.64848	40	773	8	22122	MMS22L,ZRANB3,PRIM2,WDHD1,MCM10,POLD3,POLA2,POLA1
GO:CC	neuronal cell body	GO:0043025	0.0233617	1.6315	512	654	32	22122	GFRA1,PRKAA2,MAP1B,KCNB2,LPAR1,SLC38A1,CPNE5,ALCAM,RTN1,KIF5C,KCNN2,PAM,GHR,ATOH7,CACNA1C,NEGR1,TTLL7,AKAP12,ASIC2,TPX2,CIT,SLC8A3,CACNA1A,CTNND2,STMN2,GAP43,TUBB3,SNCG,UCHL1,CNKSR2,SNCA,PRPH
GO:CC	postsynaptic membrane	GO:0045211	0.0235732	1.62758	282	1143	31	22122	ADGRB3,PTPRO,UTRN,COL13A1,ANK3,LPAR1,LRRTM4,KCNN2,HCN1,CACNA1C,GLRA2,LRFN5,CHRNA5,ERBB4,CNKSR2,SHISA9,ADAM22,CDH10,SHISA6,NSG1,ANK2,GRIP1,MUSK,NETO2,CACNG8,LRRTM3,GABRA2,CHRNB4,GRM3,CHRNA7,ABHD17B
GO:CC	desmosome	GO:0030057	0.0242345	1.61557	27	1204	8	22122	CTNNA3,PKP4,DSG2,JAM3,DSC2,DSP,B4GALT1,PKP2
GO:CC	microfibril	GO:0001527	0.0245798	1.60942	12	152	3	22122	FBN1,FBN2,LTBP1
GO:CC	contractile ring	GO:0070938	0.0246412	1.60834	10	543	4	22122	UTRN,KIF20B,ANLN,PRC1
GO:CC	axonemal central apparatus	GO:1990716	0.0255793	1.59211	4	76	2	22122	SPAG17,HYDIN
GO:CC	ciliary basal body	GO:0036064	0.0267092	1.57334	166	849	18	22122	AGBL4,AHI1,LCA5,TTLL9,CFAP206,CENPF,CENPJ,RTTN,KIAA0586,CDC45,CEP78,TRAF3IP1,DISC1,NEDD1,FANK1,TBC1D31,AURKA,POC1A
GO:CC	actin filament	GO:0005884	0.032011	1.4947	119	417	10	22122	PDLIM5,PALLD,ARHGAP6,DIAPH3,MYO3A,PAWR,FMN2,WIPF1,COTL1,JAM3
GO:CC	intercalated disc	GO:0014704	0.033492	1.47506	52	1204	11	22122	CTNNA3,ANK3,DSG2,CXADR,GJC1,DSC2,ANK2,SCN5A,TMEM65,DSP,PKP2
GO:CC	manchette	GO:0002177	0.0359411	1.44441	19	572	5	22122	SPAG17,LZTFL1,PACRG,SPEF2,CFAP221
GO:CC	cerebellar climbing fiber to Purkinje cell synapse	GO:0150053	0.0383747	1.41596	7	50	2	22122	ADGRB3,PLXNC1
GO:CC	cell cortex region	GO:0099738	0.0407365	1.39002	38	1149	9	22122	GNAI1,ERC2,GUCY1B1,PHLDB2,RIMS1,GPSM2,RIMS2,SAPCD2,PCLO
GO:CC	plasma membrane region	GO:0098590	0.0418887	1.3779	1292	1225	103	22122	ADGRB3,CNTN5,ROBO2,SHROOM3,HHIP,PTPRO,UTRN,ADGRV1,COL13A1,EGFR,EPB41L3,ANK3,EFNA5,LRP2,ERC2,LPAR1,SLC38A1,LRRTM4,PDE4D,CXADR,KANK1,ANO1,KCNN2,PTPRD,MAP7,SYT7,SLC4A4,ITGA9,HCN1,CACNA1C,ASPM,ECT2,KIF18A,CIT,PLK4,RACGAP1,SYNE2,MASTL,GLRA2,SLC2A13,SLCO3A1,LRFN5,ABCC4,CHRNA5,ERBB4,GAP43,CNKSR2,ENPP1,SHISA9,ADAM22,KCNJ3,RIMS1,SYDE2,CDH10,SHISA6,SLC38A4,TFPI,STK26,PTH1R,NSG1,ABCB1,IQGAP1,CEP55,AURKA,ANK…
KEGG	Cell cycle	KEGG:04110	0.0116049	1.93536	157	873	33	8161	CHEK1,MTBP,SMAD3,KNL1,NDC80,CDC25C,BUB1B,CDK1,BUB1,SGO1,TTK,RBL1,CDC7,AURKB,RAD21,ESCO2,DBF4,FBXO5,CHEK2,CDC45,GADD45A,CCNB1,DBF4B,TICRR,PTTG1,CDC6,E2F3,CDC20,ESPL1,CCNB2,MAD2L1,CCNA2,CCNA1
REAC	Cell Cycle	REAC:R-HSA-1640170	2.30889e-16	15.6366	679	879	125	10790	CABLES1,RFC3,FBXL7,MIS18BP1,CENPK,BRIP1,CEP135,KNTC1,BRCA2,NSD2,CHEK1,TEX15,LBR,CNTRL,RRM2,SMC4,KNL1,LMNB1,NCAPG,TOP2A,NDC80,DNA2,BLM,VRK1,NUF2,CENPI,TPX2,CDC25C,BUB1B,KIF18A,KIF23,MND1,CDK1,CENPF,PLK4,CEP192,BUB1,SGO1,CKAP5,GTSE1,CENPE,SMC2,EXO1,MSH5,CENPU,BARD1,BRCA1,RBL1,CENPP,PRIM2,CDC7,GINS1,CEP152,CENPJ,POLE2,MCM10,NCAPG2,SYNE2,MASTL,AURKB,RAD21,TUBA1B,TUBB,ESCO2,CLSPN,SGO2,POLD3,DBF4,FBXO5…
REAC	Cell Cycle, Mitotic	REAC:R-HSA-69278	3.31031e-13	12.4801	549	879	102	10790	CABLES1,RFC3,FBXL7,CENPK,CEP135,KNTC1,LBR,CNTRL,RRM2,SMC4,KNL1,LMNB1,NCAPG,TOP2A,NDC80,DNA2,VRK1,NUF2,CENPI,TPX2,CDC25C,BUB1B,KIF18A,KIF23,CDK1,CENPF,PLK4,CEP192,BUB1,SGO1,CKAP5,GTSE1,CENPE,SMC2,CENPU,RBL1,CENPP,PRIM2,CDC7,GINS1,CEP152,CENPJ,POLE2,MCM10,NCAPG2,MASTL,AURKB,RAD21,TUBA1B,TUBB,ESCO2,SGO2,POLD3,DBF4,FBXO5,CENPO,NCAPD3,SKA2,POLA2,DHFR,CDC45,CEP78,LIN9,CCNB1,ODF2,MCM8,TUBB3,TUBA1A,NEK2,…
REAC	Mitotic Prometaphase	REAC:R-HSA-68877	2.40275e-12	11.6193	200	1170	62	10790	CENPK,CEP135,KNTC1,CNTRL,SMC4,KNL1,NCAPG,NDC80,NUF2,CENPI,BUB1B,KIF18A,CDK1,CENPF,PLK4,CEP192,BUB1,SGO1,CKAP5,CENPE,SMC2,CENPU,CENPP,CEP152,CENPJ,AURKB,RAD21,TUBA1B,TUBB,SGO2,CENPO,SKA2,CEP78,CCNB1,ODF2,TUBB3,TUBA1A,NEK2,PRKAR2B,NEDD1,CDC20,CENPL,CDCA8,KIF2C,BIRC5,SPC24,NCAPD2,CENPN,INCENP,NCAPH,CCNB2,MAD2L1,SKA1,PLK1,MZT1,CEP76,NDE1,CEP70,CENPA,SPDL1,CDCA5,TUBB6
REAC	Resolution of Sister Chromatid Cohesion	REAC:R-HSA-2500257	1.9258e-09	8.71539	123	1170	42	10790	CENPK,KNTC1,KNL1,NDC80,NUF2,CENPI,BUB1B,KIF18A,CDK1,CENPF,BUB1,SGO1,CKAP5,CENPE,CENPU,CENPP,AURKB,RAD21,TUBA1B,SGO2,CENPO,SKA2,CCNB1,TUBB3,TUBA1A,CDC20,CENPL,CDCA8,KIF2C,BIRC5,SPC24,CENPN,INCENP,CCNB2,MAD2L1,SKA1,PLK1,NDE1,CENPA,SPDL1,CDCA5,TUBB6
REAC	Amplification of signal from the kinetochores	REAC:R-HSA-141424	2.15976e-08	7.66559	92	1109	33	10790	CENPK,KNTC1,KNL1,NDC80,NUF2,CENPI,BUB1B,KIF18A,CENPF,BUB1,SGO1,CKAP5,CENPE,CENPU,CENPP,AURKB,SGO2,CENPO,SKA2,CDC20,CENPL,CDCA8,KIF2C,BIRC5,SPC24,CENPN,INCENP,MAD2L1,SKA1,PLK1,NDE1,CENPA,SPDL1
REAC	Amplification of signal from unattached kinetochores via a MAD2 inhibitory signal	REAC:R-HSA-141444	2.15976e-08	7.66559	92	1109	33	10790	CENPK,KNTC1,KNL1,NDC80,NUF2,CENPI,BUB1B,KIF18A,CENPF,BUB1,SGO1,CKAP5,CENPE,CENPU,CENPP,AURKB,SGO2,CENPO,SKA2,CDC20,CENPL,CDCA8,KIF2C,BIRC5,SPC24,CENPN,INCENP,MAD2L1,SKA1,PLK1,NDE1,CENPA,SPDL1
REAC	Mitotic Spindle Checkpoint	REAC:R-HSA-69618	1.90644e-07	6.71978	109	1109	35	10790	CENPK,KNTC1,KNL1,NDC80,NUF2,CENPI,BUB1B,KIF18A,CENPF,BUB1,SGO1,CKAP5,CENPE,CENPU,CENPP,AURKB,SGO2,CENPO,SKA2,CDC20,CENPL,CDCA8,KIF2C,BIRC5,SPC24,CENPN,INCENP,UBE2C,MAD2L1,SKA1,PLK1,UBE2S,NDE1,CENPA,SPDL1
REAC	EML4 and NUDC in mitotic spindle formation	REAC:R-HSA-9648025	2.37561e-07	6.62422	115	1109	36	10790	CENPK,KNTC1,KNL1,NDC80,NUF2,CENPI,BUB1B,KIF18A,CENPF,BUB1,SGO1,CKAP5,CENPE,CENPU,CENPP,AURKB,TUBA1B,SGO2,CENPO,SKA2,TUBB3,TUBA1A,CDC20,CENPL,CDCA8,KIF2C,BIRC5,SPC24,CENPN,INCENP,MAD2L1,SKA1,PLK1,NDE1,CENPA,SPDL1
REAC	Cell Cycle Checkpoints	REAC:R-HSA-69620	2.60595e-07	6.58403	289	873	56	10790	RFC3,CENPK,BRIP1,KNTC1,NSD2,CHEK1,KNL1,NDC80,DNA2,BLM,NUF2,CENPI,CDC25C,BUB1B,KIF18A,CDK1,CENPF,BUB1,SGO1,CKAP5,GTSE1,CENPE,EXO1,CENPU,BARD1,BRCA1,CENPP,CDC7,MCM10,AURKB,CLSPN,SGO2,DBF4,CENPO,CHEK2,SKA2,CDC45,CCNB1,MCM8,PSMA1,RBBP8,CDC6,RMI1,CDC20,CENPL,CDCA8,KIF2C,BIRC5,SPC24,CENPN,INCENP,UBE2C,CCNB2,MAD2L1,CCNA2,CCNA1
REAC	RHO GTPases Activate Formins	REAC:R-HSA-5663220	7.93906e-07	6.10023	136	1109	39	10790	DIAPH3,CENPK,KNTC1,KNL1,NDC80,NUF2,CENPI,BUB1B,KIF18A,CENPF,BUB1,SGO1,CKAP5,CENPE,CENPU,CENPP,AURKB,TUBA1B,SGO2,CENPO,SKA2,TUBB3,TUBA1A,FMNL2,CDC20,CENPL,CDCA8,KIF2C,BIRC5,SPC24,CENPN,INCENP,MAD2L1,SKA1,FMNL3,PLK1,NDE1,CENPA,SPDL1
REAC	Impaired BRCA2 binding to PALB2	REAC:R-HSA-9709603	9.4798e-07	6.0232	24	787	13	10790	BRIP1,RAD51B,BRCA2,XRCC2,DNA2,RAD51AP1,BLM,EXO1,BARD1,BRCA1,RBBP8,RMI1,RAD51
REAC	Defective homologous recombination repair (HRR) due to PALB2 loss of function	REAC:R-HSA-9701193	1.84368e-06	5.73431	25	787	13	10790	BRIP1,RAD51B,BRCA2,XRCC2,DNA2,RAD51AP1,BLM,EXO1,BARD1,BRCA1,RBBP8,RMI1,RAD51
REAC	Defective HDR through Homologous Recombination Repair (HRR) due to PALB2 loss of BRCA1 binding function	REAC:R-HSA-9704331	1.84368e-06	5.73431	25	787	13	10790	BRIP1,RAD51B,BRCA2,XRCC2,DNA2,RAD51AP1,BLM,EXO1,BARD1,BRCA1,RBBP8,RMI1,RAD51
REAC	Defective HDR through Homologous Recombination Repair (HRR) due to PALB2 loss of BRCA2/RAD51/RAD51C binding function	REAC:R-HSA-9704646	1.84368e-06	5.73431	25	787	13	10790	BRIP1,RAD51B,BRCA2,XRCC2,DNA2,RAD51AP1,BLM,EXO1,BARD1,BRCA1,RBBP8,RMI1,RAD51
REAC	Defective homologous recombination repair (HRR) due to BRCA1 loss of function	REAC:R-HSA-9701192	1.84368e-06	5.73431	25	787	13	10790	BRIP1,RAD51B,BRCA2,XRCC2,DNA2,RAD51AP1,BLM,EXO1,BARD1,BRCA1,RBBP8,RMI1,RAD51
REAC	M Phase	REAC:R-HSA-68886	2.42016e-06	5.61616	408	850	67	10790	CENPK,CEP135,KNTC1,LBR,CNTRL,SMC4,KNL1,LMNB1,NCAPG,NDC80,VRK1,NUF2,CENPI,BUB1B,KIF18A,KIF23,CDK1,CENPF,PLK4,CEP192,BUB1,SGO1,CKAP5,CENPE,SMC2,CENPU,CENPP,CEP152,CENPJ,NCAPG2,MASTL,AURKB,RAD21,TUBA1B,TUBB,SGO2,FBXO5,CENPO,NCAPD3,SKA2,CEP78,CCNB1,ODF2,TUBB3,TUBA1A,NEK2,PSMA1,PRKAR2B,PTTG1,KIF20A,NEDD1,NDC1,CDC20,CENPL,CDCA8,KIF2C,ESPL1,BIRC5,SPC24,NCAPD2,CENPN,KMT5A,INCENP,UBE2C,NCAPH,CCNB2,MAD2L1
REAC	Resolution of D-loop Structures through Synthesis-Dependent Strand Annealing (SDSA)	REAC:R-HSA-5693554	6.19777e-06	5.20776	27	787	13	10790	BRIP1,RAD51B,BRCA2,XRCC2,DNA2,RAD51AP1,BLM,EXO1,BARD1,BRCA1,RBBP8,RMI1,RAD51
REAC	Mitotic Metaphase and Anaphase	REAC:R-HSA-2555396	1.15644e-05	4.93688	229	850	44	10790	CENPK,KNTC1,LBR,KNL1,LMNB1,NDC80,VRK1,NUF2,CENPI,BUB1B,KIF18A,CDK1,CENPF,BUB1,SGO1,CKAP5,CENPE,CENPU,CENPP,AURKB,RAD21,TUBA1B,SGO2,FBXO5,CENPO,SKA2,CCNB1,TUBB3,TUBA1A,PSMA1,PTTG1,NDC1,CDC20,CENPL,CDCA8,KIF2C,ESPL1,BIRC5,SPC24,CENPN,INCENP,UBE2C,CCNB2,MAD2L1
REAC	Resolution of D-loop Structures through Holliday Junction Intermediates	REAC:R-HSA-5693568	2.03325e-05	4.69181	34	787	14	10790	BRIP1,RAD51B,BRCA2,XRCC2,GEN1,DNA2,RAD51AP1,BLM,EXO1,BARD1,BRCA1,RBBP8,RMI1,RAD51
REAC	Mitotic Anaphase	REAC:R-HSA-68882	2.94264e-05	4.53126	228	850	43	10790	CENPK,KNTC1,LBR,KNL1,LMNB1,NDC80,VRK1,NUF2,CENPI,BUB1B,KIF18A,CDK1,CENPF,BUB1,SGO1,CKAP5,CENPE,CENPU,CENPP,AURKB,RAD21,TUBA1B,SGO2,CENPO,SKA2,CCNB1,TUBB3,TUBA1A,PSMA1,PTTG1,NDC1,CDC20,CENPL,CDCA8,KIF2C,ESPL1,BIRC5,SPC24,CENPN,INCENP,UBE2C,CCNB2,MAD2L1
REAC	Resolution of D-Loop Structures	REAC:R-HSA-5693537	3.16306e-05	4.49989	35	787	14	10790	BRIP1,RAD51B,BRCA2,XRCC2,GEN1,DNA2,RAD51AP1,BLM,EXO1,BARD1,BRCA1,RBBP8,RMI1,RAD51
REAC	Homologous DNA Pairing and Strand Exchange	REAC:R-HSA-5693579	9.08344e-05	4.04175	43	787	15	10790	RFC3,BRIP1,RAD51B,BRCA2,XRCC2,CHEK1,DNA2,RAD51AP1,BLM,EXO1,BARD1,BRCA1,RBBP8,RMI1,RAD51
REAC	Condensation of Prometaphase Chromosomes	REAC:R-HSA-2514853	9.55453e-05	4.01979	11	842	8	10790	SMC4,NCAPG,CDK1,SMC2,CCNB1,NCAPD2,NCAPH,CCNB2
REAC	Presynaptic phase of homologous DNA pairing and strand exchange	REAC:R-HSA-5693616	0.000224242	3.64928	40	787	14	10790	RFC3,BRIP1,RAD51B,BRCA2,XRCC2,CHEK1,DNA2,BLM,EXO1,BARD1,BRCA1,RBBP8,RMI1,RAD51
REAC	G1/S-Specific Transcription	REAC:R-HSA-69205	0.000232096	3.63433	27	878	12	10790	RRM2,CDK1,RBL1,FBXO5,DHFR,CDC45,LIN9,POLA1,CDC6,LIN54,CCNA1,TK1
REAC	Separation of Sister Chromatids	REAC:R-HSA-2467813	0.000243069	3.61427	188	850	36	10790	CENPK,KNTC1,KNL1,NDC80,NUF2,CENPI,BUB1B,KIF18A,CENPF,BUB1,SGO1,CKAP5,CENPE,CENPU,CENPP,AURKB,RAD21,TUBA1B,SGO2,CENPO,SKA2,TUBB3,TUBA1A,PSMA1,PTTG1,CDC20,CENPL,CDCA8,KIF2C,ESPL1,BIRC5,SPC24,CENPN,INCENP,UBE2C,MAD2L1
REAC	Defective homologous recombination repair (HRR) due to BRCA2 loss of function	REAC:R-HSA-9701190	0.000317877	3.49774	41	787	14	10790	RFC3,BRIP1,RAD51B,BRCA2,XRCC2,DNA2,RAD51AP1,BLM,EXO1,BARD1,BRCA1,RBBP8,RMI1,RAD51
REAC	Diseases of DNA Double-Strand Break Repair	REAC:R-HSA-9675136	0.000317877	3.49774	41	787	14	10790	RFC3,BRIP1,RAD51B,BRCA2,XRCC2,DNA2,RAD51AP1,BLM,EXO1,BARD1,BRCA1,RBBP8,RMI1,RAD51
REAC	HDR through Homologous Recombination (HRR)	REAC:R-HSA-5685942	0.000460623	3.33665	68	535	15	10790	RFC3,BRIP1,RAD51B,BRCA2,XRCC2,CHEK1,GEN1,DNA2,RAD51AP1,BLM,EXO1,BARD1,BRCA1,POLE2,POLD3
REAC	Polo-like kinase mediated events	REAC:R-HSA-156711	0.000659751	3.18062	15	980	9	10790	CDC25C,CENPF,LIN9,CCNB1,LIN54,FOXM1,CCNB2,MYBL2,PLK1
REAC	Collagen biosynthesis and modifying enzymes	REAC:R-HSA-1650814	0.000694358	3.15842	67	57	6	10790	COL25A1,COL9A1,COL23A1,ADAMTS3,COL11A1,COL13A1
REAC	Diseases of DNA repair	REAC:R-HSA-9675135	0.000832308	3.07972	50	787	15	10790	RFC3,BRIP1,RAD51B,BRCA2,XRCC2,DNA2,RAD51AP1,BLM,NEIL3,EXO1,BARD1,BRCA1,RBBP8,RMI1,RAD51
REAC	AURKA Activation by TPX2	REAC:R-HSA-8854518	0.000872581	3.05919	72	1105	22	10790	CEP135,CNTRL,TPX2,CDK1,PLK4,CEP192,CKAP5,CEP152,CENPJ,TUBB,CEP78,ODF2,TUBA1A,NEK2,PRKAR2B,NEDD1,HMMR,AURKA,PLK1,CEP76,NDE1,CEP70
REAC	Collagen chain trimerization	REAC:R-HSA-8948216	0.0017162	2.76543	44	57	5	10790	COL25A1,COL9A1,COL23A1,COL11A1,COL13A1
REAC	Kinesins	REAC:R-HSA-983189	0.00357978	2.44614	60	820	16	10790	KIF26B,KIF15,KIF11,KIF20B,KIF18A,KIF23,CENPE,KIFC1,KIF18B,RACGAP1,TUBA1B,KIF4A,TUBB3,TUBA1A,KIF20A,KIF2C
REAC	Collagen formation	REAC:R-HSA-1474290	0.00369775	2.43206	89	57	6	10790	COL25A1,COL9A1,COL23A1,ADAMTS3,COL11A1,COL13A1
REAC	Mitotic G2-G2/M phases	REAC:R-HSA-453274	0.00501724	2.29954	198	879	35	10790	FBXL7,CEP135,CNTRL,TPX2,CDC25C,CDK1,CENPF,PLK4,CEP192,CKAP5,GTSE1,CEP152,CENPJ,TUBA1B,TUBB,CEP78,LIN9,CCNB1,ODF2,TUBB3,TUBA1A,NEK2,BORA,PSMA1,PRKAR2B,E2F3,LIN54,NEDD1,FOXM1,CCNB2,HMMR,AURKA,CCNA2,CCNA1,MYBL2
REAC	Regulation of PLK1 Activity at G2/M Transition	REAC:R-HSA-2565942	0.00622929	2.20556	86	1105	23	10790	CEP135,CNTRL,CDK1,PLK4,CEP192,CKAP5,CEP152,CENPJ,TUBB,CEP78,CCNB1,ODF2,TUBA1A,NEK2,BORA,PRKAR2B,NEDD1,CCNB2,AURKA,PLK1,CEP76,NDE1,CEP70
REAC	G2/M Transition	REAC:R-HSA-69275	0.0101368	1.9941	196	879	34	10790	FBXL7,CEP135,CNTRL,TPX2,CDC25C,CDK1,CENPF,PLK4,CEP192,CKAP5,GTSE1,CEP152,CENPJ,TUBA1B,TUBB,CEP78,LIN9,CCNB1,ODF2,TUBB3,TUBA1A,NEK2,BORA,PSMA1,PRKAR2B,LIN54,NEDD1,FOXM1,CCNB2,HMMR,AURKA,CCNA2,CCNA1,MYBL2
REAC	Collagen degradation	REAC:R-HSA-1442490	0.0111185	1.95396	64	57	5	10790	COL25A1,COL9A1,COL23A1,COL11A1,COL13A1
REAC	Impaired BRCA2 binding to RAD51	REAC:R-HSA-9709570	0.0128014	1.89274	35	787	11	10790	RFC3,BRIP1,BRCA2,DNA2,BLM,EXO1,BARD1,BRCA1,RBBP8,RMI1,RAD51
REAC	Phosphorylation of Emi1	REAC:R-HSA-176417	0.0182646	1.73839	6	980	5	10790	CDK1,FBXO5,CCNB1,CDC20,PLK1
REAC	Loss of Nlp from mitotic centrosomes	REAC:R-HSA-380259	0.0227856	1.64234	69	1105	19	10790	CEP135,CNTRL,CDK1,PLK4,CEP192,CKAP5,CEP152,CENPJ,TUBB,CEP78,ODF2,TUBA1A,NEK2,PRKAR2B,NEDD1,PLK1,CEP76,NDE1,CEP70
REAC	Loss of proteins required for interphase microtubule organization from the centrosome	REAC:R-HSA-380284	0.0227856	1.64234	69	1105	19	10790	CEP135,CNTRL,CDK1,PLK4,CEP192,CKAP5,CEP152,CENPJ,TUBB,CEP78,ODF2,TUBA1A,NEK2,PRKAR2B,NEDD1,PLK1,CEP76,NDE1,CEP70
REAC	Activation of the pre-replicative complex	REAC:R-HSA-68962	0.0379186	1.42115	33	776	10	10790	PRIM2,CDC7,POLE2,MCM10,DBF4,POLA2,CDC45,MCM8,POLA1,CDC6
WP	Gastric cancer network 1	WP:WP2361	0.000397886	3.40024	28	879	13	8133	KIF15,TOP2A,E2F7,KIF20B,ECT2,TPX2,CENPF,CEP192,LIN9,UBE2C,AURKA,CCNA1,MYBL2
WP	Retinoblastoma gene in cancer	WP:WP2446	0.00639583	2.1941	90	614	19	8133	RFC3,CHEK1,RRM2,TOP2A,ANLN,CDK1,PLK4,TTK,SMC2,BARD1,CDC7,POLE2,HMGB2,POLD3,KIF4A,RRM1,DHFR,CDC45,CCNB1
WP	Regulation of sister chromatid separation at the metaphase-anaphase transition	WP:WP4240	0.0090293	2.04435	15	850	8	8133	BUB1B,BUB1,CENPE,RAD21,PTTG1,CDC20,ESPL1,MAD2L1
WP	DNA IR-damage and cellular response via ATR	WP:WP4016	0.0257356	1.58947	81	828	20	8133	BRIP1,BRCA2,CHEK1,CDC25C,CDK1,EXO1,BARD1,BRCA1,FANCD2,FANCI,CLSPN,FANCA,CHEK2,CDC45,TDP1,RBBP8,RFWD3,RMI1,RAD51,FOXM1
TF	Factor: E2F-2; motif: GCGCGCGCGYW; match class: 1	TF:M11531_1	7.29682e-10	9.13687	12643	1209	880	20011	PCDH7,CNTN5,ROBO2,FIGN,COL25A1,MDK,AGBL4,LGR5,TOX,DNAH11,ZFHX4,MAN2A1,CFAP47,MAN1A1,SLF1,HHIP,AHI1,PTPRO,UTRN,CFAP299,DNAH14,PTPRM,COL23A1,FRMD4B,ADGRV1,TENM3,ADAMTS3,SPAG17,ANOS1,MAGI3,PLXNC1,EPHA6,NALCN,MDGA2,RFC3,COL13A1,GFRA1,FOXN4,ARHGAP6,ADGB,FRRS1L,SYNPO2,EGFR,GNAI1,SDK1,ADD3,ZNF730,TBX5,PRAG1,CNTN3,PTPRN2,FBXL7,CTNNA3,NKAIN3,TEX9,TSHZ3,DPYD,PRTG,CEP112,NUP62CL,EPB41L3,HMGCS1,MIS18BP1,CENP…
TF	Factor: E2F; motif: NCSCGCSAAAN; match class: 1	TF:M00919_1	2.08306e-09	8.6813	1577	1180	163	20011	ROBO2,COL25A1,MDK,MAN2A1,UTRN,COL23A1,MDGA2,ADD3,TBX5,CTNNA3,CEP112,CDS1,SGSM1,SPSB4,EFNA5,FBN2,CNTNAP3B,LPAR1,ZIC1,CNTNAP3,TRPS1,KSR2,CPNE5,PDE10A,HELLS,KNTC1,ATAD5,DTL,TMPO,FUT9,IKZF2,CXADR,SH3GL3,KCNN2,PLPP4,FMN2,ARSG,DOCK4,IL17RD,ZGRF1,GJC1,NXPH2,COL21A1,ATOH7,MAP3K20,BCO2,NSUN7,RNASEH2B,MBNL3,EZH2,MELK,KIF11,LMNB1,NDC80,E2F7,GEN1,BLM,CENPI,KIF18A,MND1,CDK1,CKAP2,SKA3,CEP192,KIF18B,CKAP2L,CEN…
TF	Factor: E2F; motif: TTTSGCGSG; match class: 1	TF:M00918_1	3.15062e-09	8.5016	1293	1177	140	20011	ROBO2,COL25A1,MDK,MAN2A1,UTRN,COL23A1,MAGI3,MDGA2,RFC3,TBX5,PRAG1,CTNNA3,CEP112,CDS1,SGSM1,SPSB4,EFNA5,CNTNAP3B,LPAR1,ZIC1,CNTNAP3,TRPS1,KSR2,CPNE5,TTC39C,HELLS,ATAD5,FBLN7,DTL,TMPO,NSD2,CXADR,SH3GL3,KCNN2,PLPP4,FREM2,ARSG,DNAI1,IL17RD,ZGRF1,COL21A1,MAP3K20,RNASEH2B,MBNL3,EZH2,MELK,KIF11,LMNB1,NDC80,E2F7,GEN1,BLM,CENPI,KIF18A,MND1,CDK1,CKAP2,SKA3,CKAP2L,CENPU,RBL1,PRIM2,GINS1,PDE3B,POLE2,CHAF1A,Z…
TF	Factor: E2F; motif: NKCGCGCSAAAN; match class: 1	TF:M00920_1	3.81555e-09	8.41844	1344	599	89	20011	ROBO2,COL25A1,MDK,MAN2A1,UTRN,COL23A1,MDGA2,ADD3,TBX5,CTNNA3,CEP112,CDS1,SGSM1,SPSB4,EFNA5,FBN2,CNTNAP3B,LPAR1,ZIC1,CNTNAP3,TRPS1,KSR2,CPNE5,HELLS,KNTC1,ATAD5,DTL,TMPO,FUT9,IKZF2,CXADR,SH3GL3,KCNN2,PLPP4,FMN2,ARSG,DOCK4,IL17RD,ZGRF1,GJC1,STEAP2,COL21A1,ATOH7,HCN1,WNT5A,MAP3K20,NSUN7,RNASEH2B,MBNL3,RRM2,EZH2,MELK,KIF11,KNL1,LMNB1,NDC80,E2F7,GEN1,BLM,CENPI,KIF18A,MND1,CDK1,CKAP2,SKA3,KIF18B,CKAP2L,…
TF	Factor: E2F; motif: GGCGSG; match class: 1	TF:M00803_1	5.25422e-08	7.27949	10475	1271	780	20011	PCDH7,CNTN5,ROBO2,FIGN,MDK,AGBL4,LGR5,TOX,DNAH11,ZFHX4,MAN2A1,MAN1A1,HHIP,AHI1,PTPRO,UTRN,DNAH14,PTPRM,COL23A1,ADGRV1,ANOS1,MAGI3,PLXNC1,EPHA6,NALCN,MDGA2,RFC3,COL13A1,GFRA1,FOXN4,ARHGAP6,FRRS1L,EGFR,GNAI1,SDK1,ADD3,ZNF730,KIRREL3,PRAG1,CNTN3,PTPRN2,FBXL7,NKAIN3,TSHZ3,DPYD,PRTG,CEP112,NUP62CL,EPB41L3,MIS18BP1,CENPK,MMS22L,TMEM132D,PRKAA2,CYP1B1,FBN1,PLEKHG4B,ZBTB16,SCLT1,AMPH,CEP135,MAP1B,CDS1,SG…
TF	Factor: E2F; motif: TTTSGCGSG; match class: 1	TF:M00939_1	8.57783e-08	7.06662	1731	1180	169	20011	ROBO2,COL25A1,MDK,MAN2A1,UTRN,COL23A1,MAGI3,MDGA2,GFRA1,ADD3,TBX5,CTNNA3,CEP112,CDS1,SGSM1,SPSB4,EFNA5,FBN2,CNTNAP3B,LPAR1,ZIC1,CNTNAP3,TRPS1,LZTFL1,KSR2,CPNE5,PDE10A,HELLS,KNTC1,ATAD5,DTL,TMPO,FUT9,CXADR,SH3GL3,KCNN2,PLPP4,FMN2,ARSG,DOCK4,IL17RD,ZGRF1,GJC1,NXPH2,COL21A1,ATOH7,HCN1,ANKRD30BL,MAP3K20,BCO2,NSUN7,RNASEH2B,MBNL3,EZH2,MELK,KIF11,LMNB1,NDC80,E2F7,GEN1,BLM,CENPI,KIF18A,MND1,CDK1,CKAP2,S…
TF	Factor: E2F-2; motif: GCGCGCGCGYW	TF:M11531	1.5388e-07	6.81282	13595	879	683	20011	PCDH7,CNTN5,ROBO2,FIGN,COL25A1,MDK,AGBL4,LGR5,TOX,DNAH11,ZFHX4,MAN2A1,CFAP47,MAN1A1,SLF1,HHIP,AHI1,PTPRO,UTRN,CFAP299,DNAH14,PTPRM,COL23A1,FRMD4B,ADGRV1,TENM3,ADAMTS3,SPAG17,ANOS1,MAGI3,PLXNC1,EPHA6,NALCN,MDGA2,RFC3,COL13A1,GFRA1,FOXN4,TEKT1,ARHGAP6,ADGB,FRRS1L,SYNPO2,EGFR,GNAI1,SDK1,ADD3,ZNF730,KIRREL3,TBX5,PRAG1,CNTN3,PTPRN2,FBXL7,CTNNA3,NKAIN3,TEX9,TSHZ3,DPYD,PRTG,CEP112,NUP62CL,EPB41L3,HMGCS1…
TF	Factor: ETF; motif: GVGGMGG; match class: 1	TF:M00695_1	4.87472e-07	6.31205	7207	1200	536	20011	PCDH7,MDK,TOX,MAN2A1,MAN1A1,SLF1,HHIP,PTPRO,UTRN,CFAP299,DNAH14,PTPRM,COL23A1,MAGI3,PLXNC1,NALCN,MDGA2,GFRA1,FOXN4,ARHGAP6,SYNPO2,EGFR,SDK1,ADD3,HYDIN,TBX5,PRAG1,CNTN3,PTPRN2,FBXL7,NKAIN3,TSHZ3,PRTG,CEP112,NUP62CL,EPB41L3,TMEM132D,PRKAA2,CYP1B1,FBN1,SCLT1,AMPH,CEP135,CDS1,SGSM1,ZFHX3,TMEM178A,CA8,LEF1,PKP4,SPSB4,DOK5,CHST11,EFNA5,RALYL,FBN2,NPAS3,CADPS2,CDH6,BOC,NRIP1,RELN,KCNB2,LTBP1,CPE,LPAR1,L…
TF	Factor: E2F3; motif: NNRGMKGGAR; match class: 1	TF:M12598_1	5.06701e-07	6.29525	7116	1202	531	20011	PCDH7,ROBO2,FIGN,COL25A1,MDK,TOX,MAN2A1,MAN1A1,SLF1,HHIP,AHI1,UTRN,COL23A1,ADAMTS3,ANOS1,MAGI3,PLXNC1,EPHA6,KCNT2,COL11A1,MDGA2,RFC3,COL13A1,GFRA1,FOXN4,ARHGAP6,EGFR,GNAI1,ADD3,KIRREL3,TBX5,PRAG1,PTPRN2,NKAIN3,TEX9,DPYD,NUP62CL,EPB41L3,DIAPH3,MMS22L,TMEM132D,PRKAA2,CYP1B1,FBN1,PLEKHG4B,AMPH,MAP1B,CDS1,SGSM1,ZFHX3,TMEM178A,LEF1,PKP4,EFNA5,RALYL,LRP2,NPAS3,CNTNAP3B,BOC,KCNB2,OPCML,LPAR1,ZIC1,SLC38A…
TF	Factor: Egr-1; motif: GCGCATGCG; match class: 1	TF:M04869_1	5.18533e-07	6.28522	10508	1230	753	20011	CNTN5,FIGN,COL25A1,MDK,LGR5,DNAH11,MAN2A1,MAN1A1,HHIP,AHI1,PTPRO,CFAP299,DNAH14,PTPRM,COL23A1,FRMD4B,ANOS1,MAGI3,PLXNC1,EPHA6,NALCN,MDGA2,RFC3,COL13A1,GFRA1,FOXN4,TEKT1,FRRS1L,EGFR,GNAI1,SDK1,ADD3,PRAG1,CNTN3,PTPRN2,FBXL7,CTNNA3,NKAIN3,TEX9,TSHZ3,PRTG,NUP62CL,EPB41L3,HMGCS1,MIS18BP1,MMS22L,TMEM132D,PRKAA2,CFAP54,FBN1,PLEKHG4B,ZBTB16,SCLT1,CEP135,MAP1B,SGSM1,ZFHX3,TMEM178A,CA8,LEF1,KIF26B,LCA5,SPS…
TF	Factor: E2F1; motif: NNNNNGCGSSAAAN	TF:M08874	5.7801e-07	6.23806	7382	910	427	20011	PCDH7,ROBO2,FIGN,COL25A1,TOX,DNAH11,MAN2A1,CFAP47,MAN1A1,SLF1,HHIP,AHI1,UTRN,DNAH14,PTPRM,COL23A1,ADAMTS3,ANOS1,MAGI3,PLXNC1,COL11A1,MDGA2,RFC3,GFRA1,FOXN4,ARHGAP6,FRRS1L,SDK1,ADD3,ZNF730,KIRREL3,TBX5,TMEM232,CNTN3,PTPRN2,FBXL7,CTNNA3,NKAIN3,TEX9,DPYD,PRTG,CEP112,NUP62CL,CENPK,MMS22L,PRKAA2,CFAP54,CYP1B1,FBN1,PLEKHG4B,ZBTB16,SCLT1,AMPH,CDS1,SGSM1,TMEM178A,LEF1,KIF26B,PKP4,SPSB4,DOK5,CHST11,EFNA5,…
TF	Factor: E2F-4; motif: NGGCGGGAARN; match class: 1	TF:M07084_1	1.04168e-06	5.98227	5573	1269	452	20011	PCDH7,MDK,TOX,MAN2A1,MAN1A1,SLF1,AHI1,PTPRM,COL23A1,ADAMTS3,MAGI3,PLXNC1,KCNT2,MDGA2,RFC3,GFRA1,FOXN4,EGFR,GNAI1,SDK1,ADD3,TBX5,PTPRN2,NKAIN3,TEX9,DPYD,PRTG,NUP62CL,DIAPH3,MMS22L,PRKAA2,CYP1B1,FBN1,PLEKHG4B,SCLT1,AMPH,CEP135,CDS1,SGSM1,TMEM178A,LEF1,PKP4,EFNA5,LRP2,NPAS3,CNTNAP3B,BOC,RELN,KCNB2,LPAR1,SLC38A1,CNTNAP3,CAMK4,IQGAP2,SYNPR,CPNE5,CCDC175,HIVEP2,ADARB2,STK32B,CPEB1,DSG2,RAD51B,MYO3A,PDE…
TF	Factor: ETF; motif: GVGGMGG	TF:M00695	1.2018e-06	5.92017	10683	1205	747	20011	PCDH7,ROBO2,FIGN,MDK,LGR5,TOX,DNAH11,MAN2A1,MAN1A1,SLF1,HHIP,PTPRO,UTRN,CFAP299,DNAH14,PTPRM,COL23A1,ADAMTS3,ANOS1,MAGI3,PLXNC1,EPHA6,NALCN,MDGA2,COL13A1,GFRA1,FOXN4,ARHGAP6,FRRS1L,SYNPO2,EGFR,GNAI1,SDK1,ADD3,HYDIN,TBX5,PRAG1,CNTN3,PTPRN2,FBXL7,CTNNA3,NKAIN3,TSHZ3,PRTG,CEP112,NUP62CL,EPB41L3,MIS18BP1,DIAPH3,CENPK,TMEM132D,PRKAA2,CYP1B1,FBN1,PLEKHG4B,ZBTB16,SCLT1,AMPH,CEP135,MAP1B,CDS1,SGSM1,ZFHX3…
TF	Factor: E2F; motif: TTTSGCGS; match class: 1	TF:M00427_1	7.09717e-06	5.14891	3941	1028	279	20011	PCDH7,ROBO2,COL25A1,MDK,TOX,MAN2A1,CFAP47,SLF1,AHI1,UTRN,COL23A1,MAGI3,EPHA6,MDGA2,RFC3,GFRA1,FOXN4,FRRS1L,SDK1,ADD3,KIRREL3,TBX5,PRAG1,CNTN3,FBXL7,CTNNA3,NKAIN3,TSHZ3,DPYD,CEP112,NUP62CL,CYP1B1,ZBTB16,SCLT1,CDS1,SGSM1,LEF1,SPSB4,EFNA5,FBN2,CNTNAP3B,BOC,NRIP1,ERC2,LPAR1,ZIC1,SLC38A1,FRAS1,CNTNAP3,TRPS1,LZTFL1,KSR2,CPNE5,PDE10A,TTC39C,PPP2R2B,HELLS,KNTC1,ATAD5,DTL,BRCA2,C21ORF58,TMPO,CHEK1,FUT9,CX…
TF	Factor: E2F-1:DP-2; motif: TTTSSCGC; match class: 1	TF:M00737_1	1.50035e-05	4.82381	3012	1214	256	20011	PCDH7,DNAH11,MAN2A1,CFAP47,AHI1,PTPRM,COL23A1,MAGI3,KCNT2,RFC3,GFRA1,FOXN4,ZNF730,TBX5,FBXL7,NKAIN3,TEX9,CEP112,NUP62CL,CYP1B1,CDS1,ZFHX3,PKP4,EFNA5,BOC,GPC6,ZIC1,SLC38A1,FRAS1,KSR2,CCDC175,HIVEP2,STK32B,DSG2,RAD51B,HELLS,ATAD5,DTL,C21ORF58,TMPO,NSD2,CHEK1,FUT9,CCDC33,CERKL,PAWR,ZNF732,KBTBD12,TMEM45A,MAP7,KITLG,COLEC12,CCDC148,FGF19,EFCAB6,CCDC30,ANKH,ARSG,MTBP,FHIT,N4BP2L1,PLXNA4,MAST4,BACE2,GU…
TF	Factor: E2F; motif: TTTSGCGS; match class: 1	TF:M00426_1	3.02704e-05	4.51898	5976	1250	464	20011	PCDH7,ROBO2,COL25A1,MDK,LGR5,DNAH11,MAN2A1,CFAP47,SLF1,AHI1,UTRN,COL23A1,ADAMTS3,ANOS1,MAGI3,EPHA6,NALCN,MDGA2,RFC3,GFRA1,FOXN4,TEKT1,FRRS1L,SDK1,ADD3,ZNF730,KIRREL3,TBX5,PRAG1,CNTN3,FBXL7,CTNNA3,NKAIN3,DPYD,CEP112,NUP62CL,DIAPH3,CYP1B1,FBN1,PLEKHG4B,ZBTB16,SCLT1,CDS1,SGSM1,CA8,LEF1,RGS22,SPSB4,DOK5,CHST11,EFNA5,FBN2,CNTNAP3B,BOC,NRIP1,KCNB2,DAPL1,LPAR1,ZIC1,SLC38A1,FRAS1,CNTNAP3,TRPS1,LZTFL1,KSR…
TF	Factor: E2F-1; motif: NNNSSCGCSAANN; match class: 1	TF:M07250_1	4.15899e-05	4.38101	5671	1203	428	20011	PCDH7,ROBO2,FIGN,COL25A1,AGBL4,TOX,MAN2A1,CFAP47,MAN1A1,SLF1,HHIP,AHI1,UTRN,PTPRM,COL23A1,MAGI3,EPHA6,MDGA2,RFC3,COL13A1,GFRA1,ARHGAP6,EGFR,SDK1,ADD3,KIRREL3,TBX5,CNTN3,PTPRN2,FBXL7,CTNNA3,NKAIN3,TEX9,TSHZ3,DPYD,PRTG,CEP112,MIS18BP1,CENPK,CYP1B1,PLEKHG4B,SCLT1,CDS1,SGSM1,LEF1,KIF26B,PKP4,SPSB4,DOK5,CHST11,EFNA5,FBN2,NPAS3,CNTNAP3B,NRIP1,RELN,LTBP1,ERC2,LPAR1,ZIC1,SLC38A1,CNTNAP3,NR2F1,TRPS1,LZTFL…
TF	Factor: E2F-1; motif: NNNSSCGCSAANN	TF:M07250	4.22865e-05	4.3738	11002	1210	759	20011	PCDH7,ROBO2,FIGN,COL25A1,MDK,AGBL4,TOX,DNAH11,ZFHX4,MAN2A1,CFAP47,MAN1A1,SLF1,HHIP,AHI1,UTRN,PTPRM,COL23A1,FRMD4B,ADGRV1,TENM3,SPAG17,ANOS1,MAGI3,PLXNC1,EPHA6,MDGA2,RFC3,COL13A1,GFRA1,FOXN4,TEKT1,DCDC1,ARHGAP6,FRRS1L,EGFR,SDK1,ADD3,ZNF730,KIRREL3,HYDIN,TBX5,TMEM232,PRAG1,CNTN3,PTPRN2,FBXL7,CTNNA3,NKAIN3,TEX9,TSHZ3,DPYD,PRTG,CEP112,HMGCS1,MIS18BP1,DIAPH3,CENPK,TMEM132D,PRKAA2,CFAP54,CYP1B1,FBN1,PL…
TF	Factor: E2F; motif: TTTCGCGC; match class: 1	TF:M00425_1	5.73544e-05	4.24143	5500	989	350	20011	PCDH7,ROBO2,FIGN,COL25A1,MDK,AGBL4,TOX,MAN2A1,CFAP47,SLF1,AHI1,UTRN,PTPRM,COL23A1,ADAMTS3,MAGI3,EPHA6,MDGA2,RFC3,GFRA1,TEKT1,DCDC1,EGFR,SDK1,ADD3,KIRREL3,TBX5,PRAG1,CNTN3,FBXL7,CTNNA3,TSHZ3,CEP112,HMGCS1,CYP1B1,FBN1,SCLT1,CDS1,SGSM1,LEF1,SPSB4,DOK5,EFNA5,LRP2,FBN2,CNTNAP3B,NRIP1,ERC2,LPAR1,ZIC1,SLC38A1,FRAS1,CNTNAP3,TRPS1,LZTFL1,IFITM2,KSR2,CPNE5,PRLR,ALCAM,PDE10A,TTC39C,PPP2R2B,NR2F2,HELLS,KNTC1…
TF	Factor: DB1; motif: GGRRRRGRRGGAGGGGGNGRRR; match class: 1	TF:M10107_1	5.90249e-05	4.22896	2737	288	75	20011	PCDH7,ROBO2,MDK,TOX,ZFHX4,MAN2A1,HHIP,ADGRV1,ANOS1,MAGI3,PLXNC1,EPHA6,MDGA2,COL13A1,GFRA1,TEKT1,ARHGAP6,FRRS1L,EGFR,TSHZ3,PRTG,AMPH,MAP1B,CDS1,SPSB4,DOK5,CPAMD8,FBN2,NPAS3,CADPS2,CNTNAP3B,BOC,KCNB2,LTBP1,OPCML,ZIC1,NR2F1,LHX9,CACNB2,CAMK4,TRPS1,IQGAP2,KSR2,CPNE5,HIVEP2,PRLR,ALCAM,STK32B,CLVS2,ELMO1,RBMS1,TTC39C,JAZF1,RRAS2,NR2F2,FBLN7,FUT9,CXADR,SH3GL3,GPC4,ZNF423,PAWR,LDB2,EDIL3,GNG12,LMBRD1,PCN…
TF	Factor: Rb:E2F-1:DP-1; motif: TTTSGCGC; match class: 1	TF:M00740_1	9.07713e-05	4.04205	4713	1215	367	20011	PCDH7,COL25A1,MDK,MAN2A1,CFAP47,SLF1,AHI1,UTRN,PTPRM,COL23A1,ADAMTS3,MAGI3,MDGA2,RFC3,FOXN4,TEKT1,SDK1,ZNF730,KIRREL3,TBX5,PRAG1,CNTN3,FBXL7,CTNNA3,NKAIN3,DPYD,CEP112,NUP62CL,CFAP54,CYP1B1,FBN1,ZBTB16,SCLT1,CDS1,SGSM1,LEF1,SPSB4,EFNA5,CADPS2,BOC,LPAR1,ZIC1,SLC38A1,FRAS1,PDE4D,TRPS1,KSR2,CPNE5,CYYR1,PRLR,RAD51B,PDE10A,TTC39C,PPP2R2B,HELLS,KNTC1,ATAD5,DTL,BRCA2,C21ORF58,ATAD2,TMPO,CHEK1,FUT9,IKZF2,…
TF	Factor: E2F-1; motif: NGGGCGGGARV; match class: 1	TF:M07206_1	9.69149e-05	4.01361	11135	1216	768	20011	PCDH7,ROBO2,FIGN,COL25A1,MDK,AGBL4,TOX,DNAH11,MAN2A1,MAN1A1,SLF1,HHIP,AHI1,PTPRO,CABLES1,UTRN,CFAP299,PTPRM,COL23A1,ADAMTS3,ANOS1,MAGI3,PLXNC1,EPHA6,KCNT2,COL11A1,MDGA2,RFC3,COL13A1,GFRA1,FOXN4,TEKT1,ARHGAP6,FRRS1L,EGFR,GNAI1,SDK1,ADD3,KIRREL3,TBX5,PRAG1,PTPRN2,FBXL7,NKAIN3,TEX9,TSHZ3,DPYD,PRTG,CEP112,NUP62CL,EPB41L3,HMGCS1,DIAPH3,CENPK,MMS22L,PRKAA2,CYP1B1,FBN1,PLEKHG4B,SCLT1,AMPH,CEP135,MAP1B,C…
TF	Factor: E2F-4; motif: SNGGGCGGGAANN; match class: 1	TF:M09894_1	0.000108537	3.96442	14291	868	689	20011	PCDH7,KIAA1217,ROBO2,FIGN,COL25A1,MDK,AGBL4,LGR5,TOX,DNAH11,MAN2A1,MAN1A1,SLF1,HHIP,AHI1,PTPRO,CABLES1,UTRN,DNAH14,PTPRM,COL23A1,FRMD4B,ADGRV1,ADAMTS3,ANOS1,MAGI3,PLXNC1,EPHA6,KCNT2,COL11A1,NALCN,MDGA2,RFC3,COL13A1,GFRA1,FOXN4,TEKT1,ARHGAP6,ADGB,FRRS1L,EGFR,GNAI1,SDK1,ADD3,ZNF730,KIRREL3,HYDIN,TBX5,PRAG1,CNTN3,S1PR3,PTPRN2,FBXL7,CTNNA3,NKAIN3,TEX9,TSHZ3,DPYD,PRTG,CEP112,NUP62CL,EPB41L3,HMGCS1,MIS…
TF	Factor: E2F-4:DP-1; motif: TTTSGCGC; match class: 1	TF:M00738_1	0.000110691	3.95589	4105	1202	323	20011	PCDH7,COL25A1,MAN2A1,CFAP47,SLF1,AHI1,UTRN,PTPRM,COL23A1,MAGI3,MDGA2,RFC3,FOXN4,SDK1,ZNF730,TBX5,PRAG1,CNTN3,PTPRN2,FBXL7,CTNNA3,NKAIN3,DPYD,CEP112,NUP62CL,CENPK,CFAP54,CYP1B1,FBN1,ZBTB16,SCLT1,CDS1,SGSM1,LEF1,PKP4,SPSB4,EFNA5,BOC,LPAR1,ZIC1,SLC38A1,FRAS1,PDE4D,TRPS1,LZTFL1,KSR2,CPNE5,CYYR1,PRLR,RAD51B,PDE10A,TTC39C,PPP2R2B,HELLS,KNTC1,ATAD5,DTL,C21ORF58,TMPO,NSD2,CHEK1,FUT9,CXADR,SH3GL3,CFAP69,G…
TF	Factor: E2F-1; motif: TTTSGCGCGMNR; match class: 1	TF:M00516_1	0.000124306	3.90551	2122	1179	184	20011	COL25A1,MDK,MAN2A1,AHI1,UTRN,COL23A1,MDGA2,RFC3,SDK1,TBX5,CNTN3,FBXL7,CTNNA3,CEP112,CYP1B1,CDS1,SGSM1,SPSB4,EFNA5,CNTNAP3B,LPAR1,ZIC1,SLC38A1,CNTNAP3,TRPS1,KSR2,CPNE5,CPEB1,PDE10A,HELLS,KNTC1,ATAD5,DTL,ATAD2,TMPO,CHEK1,FUT9,IKZF2,CXADR,SH3GL3,KCNN2,KITLG,FMN2,ARSG,ZRANB3,DOCK4,IL17RD,ZGRF1,STEAP2,COL21A1,ATOH7,KCNMB4,USP53,ONECUT1,ANKRD30BL,UMAD1,MAP3K20,RNASEH2B,MBNL3,PLSCR1,RRM2,EZH2,KIF11,KNL1…
TF	Factor: ZF5; motif: NGAGCGCGC	TF:M10111	0.000140425	3.85256	2717	1287	242	20011	COL25A1,TOX,MAN1A1,UTRN,COL23A1,FRMD4B,ADGRV1,SPAG17,ANOS1,PLXNC1,EPHA6,NALCN,MDGA2,RFC3,GFRA1,ADGB,GNAI1,PTPRN2,FBXL7,CTNNA3,TSHZ3,PRTG,TMEM132D,CYP1B1,FBN1,AMPH,CA8,DOK5,CHST11,GPC6,LTBP1,ERC2,FRAS1,IQGAP2,KSR2,ADARB2,CLVS2,DSG2,PDE10A,RRAS2,FBLN7,C21ORF58,ATAD2,TMPO,FUT9,IKZF2,COL19A1,CXADR,ANO1,PAWR,WASF3,KIF5C,PLPP4,EDIL3,IGFBPL1,SPARC,FGF19,SYT17,ARSG,BCAR3,STXBP5,CHST15,ABCA5,PPM1L,DOCK4,R…
TF	Factor: E2F-4; motif: GCGGGAAANA; match class: 1	TF:M02090_1	0.000294388	3.53108	6549	896	367	20011	MDK,MAN2A1,MAN1A1,SLF1,AHI1,UTRN,DNAH14,PTPRM,COL23A1,ADGRV1,ADAMTS3,ANOS1,MAGI3,PLXNC1,EPHA6,COL11A1,RFC3,FOXN4,ARHGAP6,EGFR,GNAI1,ADD3,TBX5,CTNNA3,NKAIN3,TEX9,TSHZ3,DPYD,CEP112,NUP62CL,EPB41L3,HMGCS1,MIS18BP1,MMS22L,TMEM132D,CYP1B1,FBN1,SCLT1,AMPH,CEP135,MAP1B,CDS1,SGSM1,TMEM178A,LEF1,KIF26B,LCA5,PKP4,SPSB4,CHST11,RALYL,CPAMD8,LRP2,NPAS3,CADPS2,CNTNAP3B,RELN,KCNB2,LTBP1,OPCML,LPAR1,ZIC1,SLC38A1…
TF	Factor: E2F-4; motif: NNTTCCCGCCNN; match class: 1	TF:M04823_1	0.000299216	3.52401	8041	1203	571	20011	PCDH7,FIGN,COL25A1,MDK,TOX,MAN2A1,MAN1A1,SLF1,AHI1,PTPRM,COL23A1,ADAMTS3,MAGI3,PLXNC1,EPHA6,KCNT2,COL11A1,MDGA2,RFC3,GFRA1,FOXN4,TEKT1,EGFR,GNAI1,SDK1,ADD3,KIRREL3,TBX5,PTPRN2,NKAIN3,TEX9,DPYD,PRTG,NUP62CL,EPB41L3,HMGCS1,MIS18BP1,DIAPH3,MMS22L,PRKAA2,CYP1B1,FBN1,PLEKHG4B,SCLT1,AMPH,CEP135,MAP1B,CDS1,SGSM1,ZFHX3,TMEM178A,CA8,LEF1,LCA5,PKP4,SPSB4,EFNA5,RALYL,CPAMD8,LRP2,NPAS3,CNTNAP3B,BOC,RELN,KCNB…
TF	Factor: ZF5; motif: NRNGNGCGCGCWN; match class: 1	TF:M00333_1	0.000394756	3.40367	12713	1205	849	20011	PCDH7,CNTN5,ROBO2,FIGN,COL25A1,MDK,LGR5,TOX,DNAH11,ZFHX4,MAN2A1,MAN1A1,HHIP,AHI1,PTPRO,UTRN,CFAP299,DNAH14,PTPRM,COL23A1,FRMD4B,ADGRV1,ADAMTS3,SPAG17,ANOS1,MAGI3,PLXNC1,EPHA6,KCNT2,COL11A1,NALCN,MDGA2,RFC3,COL13A1,GFRA1,FOXN4,ADGB,FRRS1L,SYNPO2,EGFR,GNAI1,SDK1,ADD3,ZNF730,KIRREL3,TBX5,PRAG1,CNTN3,PTPRN2,FBXL7,CTNNA3,NKAIN3,TSHZ3,DPYD,PRTG,CEP112,NUP62CL,EPB41L3,MIS18BP1,DIAPH3,CENPK,MMS22L,TMEM13…
TF	Factor: E2F-1; motif: NNNNGGCGGGAARN; match class: 1	TF:M09892_1	0.000505702	3.29611	9415	1205	654	20011	PCDH7,FIGN,COL25A1,MDK,AGBL4,TOX,MAN2A1,MAN1A1,SLF1,AHI1,PTPRM,COL23A1,ADAMTS3,ANOS1,MAGI3,PLXNC1,EPHA6,KCNT2,COL11A1,NALCN,MDGA2,RFC3,COL13A1,GFRA1,FOXN4,TEKT1,FRRS1L,EGFR,GNAI1,SDK1,ADD3,KIRREL3,TBX5,PTPRN2,NKAIN3,TEX9,TSHZ3,DPYD,PRTG,CEP112,NUP62CL,EPB41L3,HMGCS1,MIS18BP1,DIAPH3,MMS22L,PRKAA2,CYP1B1,FBN1,PLEKHG4B,SCLT1,AMPH,CEP135,MAP1B,CDS1,SGSM1,ZFHX3,TMEM178A,CA8,LEF1,LCA5,PKP4,SPSB4,CHST11…
TF	Factor: E2F-4:DP-2; motif: TTTCSCGC	TF:M00739	0.000631589	3.19957	5739	910	331	20011	PCDH7,COL25A1,DNAH11,MAN2A1,CFAP47,SLF1,AHI1,CFAP299,PTPRM,COL23A1,MAGI3,EPHA6,KCNT2,RFC3,GFRA1,FOXN4,FRRS1L,SDK1,ZNF730,TMEM232,CTNNA3,NKAIN3,TEX9,DPYD,CEP112,NUP62CL,MMS22L,CFAP54,CYP1B1,FBN1,PLEKHG4B,ZBTB16,SCLT1,CDS1,ZFHX3,LEF1,KIF26B,SPSB4,DOK5,EFNA5,RALYL,LRP2,CNTNAP3B,BOC,GPC6,OPCML,LPAR1,ZIC1,SLC38A1,CNTNAP3,PDE4D,NR2F1,NPFFR2,CAMK4,IQGAP2,CPNE5,CCDC175,HIVEP2,STK32B,CPEB1,DSG2,RAD51B,MYO…
TF	Factor: E2F-4; motif: NGGCGGGAARN	TF:M07084	0.000636389	3.19628	11111	996	631	20011	PCDH7,ROBO2,FIGN,COL25A1,MDK,AGBL4,TOX,DNAH11,MAN2A1,MAN1A1,SLF1,HHIP,AHI1,PTPRO,UTRN,CFAP299,DNAH14,PTPRM,COL23A1,ADAMTS3,ANOS1,MAGI3,PLXNC1,EPHA6,KCNT2,COL11A1,NALCN,MDGA2,RFC3,COL13A1,GFRA1,FOXN4,TEKT1,ARHGAP6,EGFR,GNAI1,SDK1,ADD3,KIRREL3,TBX5,PRAG1,PTPRN2,CTNNA3,NKAIN3,TEX9,TSHZ3,DPYD,PRTG,NUP62CL,EPB41L3,HMGCS1,DIAPH3,CENPK,MMS22L,TMEM132D,PRKAA2,CYP1B1,FBN1,PLEKHG4B,ZBTB16,SCLT1,AMPH,CEP135…
TF	Factor: FPM315; motif: GGAGGAGGRRGRGGRGGRRGR	TF:M07141	0.000731315	3.1359	2215	244	55	20011	PCDH7,ROBO2,DNAH11,HHIP,ADGRV1,ADAMTS3,MAGI3,EPHA6,MDGA2,COL13A1,TEKT1,ARHGAP6,PDE7B,SDK1,TSHZ3,AMPH,MAP1B,CDS1,ZFHX3,CA8,LEF1,RGS22,SPSB4,DOK5,NPAS3,CADPS2,BOC,KCNB2,LTBP1,ERC2,ZIC1,NR2F1,LHX9,HMX1,TRPS1,KSR2,HIVEP2,ADARB2,PRLR,ALCAM,STK32B,CLVS2,RBMS1,JAZF1,NR2F2,C21ORF58,CHEK1,SH3GL3,CCDC33,GPC4,ZNF423,PAWR,LDB2,EDIL3,GNG12
TF	Factor: E2F; motif: NNTTTCGCGCN	TF:M08875	0.000913809	3.03914	6379	1220	470	20011	PCDH7,ROBO2,FIGN,COL25A1,LGR5,TOX,DNAH11,MAN2A1,MAN1A1,SLF1,HHIP,AHI1,UTRN,DNAH14,PTPRM,COL23A1,FRMD4B,ANOS1,MAGI3,PLXNC1,EPHA6,MDGA2,RFC3,COL13A1,GFRA1,FOXN4,ARHGAP6,SDK1,ADD3,ZNF730,KIRREL3,TMEM232,CNTN3,PTPRN2,FBXL7,CTNNA3,NKAIN3,TSHZ3,DPYD,PRTG,CEP112,NUP62CL,CENPK,MMS22L,PRKAA2,CFAP54,CYP1B1,FBN1,ZBTB16,SCLT1,CDS1,SGSM1,LEF1,PKP4,SPSB4,DOK5,CHST11,EFNA5,LRP2,CADPS2,CNTNAP3B,NRIP1,KCNB2,ERC2,…
TF	Factor: ZBTB14; motif: SSCCGCGCACNS	TF:M12461	0.00102002	2.99139	2945	1170	234	20011	COL25A1,MDK,TOX,HHIP,COL23A1,ADGRV1,MDGA2,EGFR,GNAI1,FBXL7,TSHZ3,CEP112,TMEM132D,MAP1B,SGSM1,ZFHX3,TMEM178A,LEF1,KIF26B,SPSB4,CHST11,EFNA5,CPAMD8,FBN2,NPAS3,CADPS2,CNTNAP3B,BOC,KCNB2,OPCML,CPE,ERC2,LPAR1,CNTNAP3,LHX9,CAMK4,HMX1,IQGAP2,LZTFL1,CPNE5,CYYR1,HIVEP2,PDE10A,NR2F2,NSD2,IKZF2,SH3GL3,GPC4,ANO1,PAWR,WASF3,KIF5C,KCNN2,EDIL3,ZNF732,COL6A6,MAP7,IGFBPL1,LMBRD1,ARHGAP24,SLIT2,SYT7,RASGRF2,COLEC1…
TF	Factor: E2F-1; motif: TTTSGCGS; match class: 1	TF:M00431_1	0.00105428	2.97704	2321	1214	198	20011	COL25A1,MAN2A1,SLF1,UTRN,COL23A1,MAGI3,EPHA6,RFC3,FOXN4,SDK1,ADD3,FBXL7,CTNNA3,NKAIN3,TSHZ3,DPYD,NUP62CL,CYP1B1,ZBTB16,SCLT1,SGSM1,LEF1,SPSB4,EFNA5,FBN2,NRIP1,ERC2,LPAR1,ZIC1,SLC38A1,TRPS1,CPNE5,PDE10A,HELLS,DTL,C21ORF58,TMPO,CHEK1,FUT9,SH3GL3,ANO1,PAWR,KITLG,FMN2,ARSG,DOCK4,IL17RD,NXPH2,PLAGL1,COL21A1,ONECUT1,UMAD1,MAP3K20,NRK,NSUN7,RNASEH2B,MBNL3,EZH2,SMC4,KIF11,LMNB1,NDC80,E2F7,GEN1,BLM,ECT2,K…
TF	Factor: POU5F1B; motif: ATGMATATKCAW	TF:M04089	0.00110687	2.9559	493	271	23	20011	PDLIM5,NHSL1,ADGB,SYNPO2,ZNF730,CP,S1PR3,NKAIN3,BRIP1,CFAP54,CEP135,ANK3,CEP128,NPAS3,CNTNAP3B,CNTNAP3,RRAS2,CHEK1,COL19A1,LMBRD1,KITLG,FAR2,SLIT2
TF	Factor: E2F; motif: TTTSGCGC; match class: 1	TF:M00050_1	0.00193471	2.71338	1927	578	93	20011	PCDH7,COL25A1,MAN2A1,PTPRM,COL23A1,MDGA2,RFC3,FOXN4,ZNF730,TBX5,CTNNA3,CEP112,NUP62CL,CFAP54,CYP1B1,CDS1,EFNA5,BOC,ZIC1,SLC38A1,FRAS1,TRPS1,KSR2,CYYR1,PRLR,RAD51B,HELLS,ATAD5,DTL,C21ORF58,TMPO,CHEK1,FUT9,CFAP69,CERKL,PAWR,ZNF732,TMEM45A,ARSG,MTBP,FHIT,AFF3,IL17RD,ZGRF1,MAST4,GUCY1B1,PLAGL1,CACNA1C,UMAD1,MAP3K20,NRK,SLC44A3,SLC27A6,ZMAT4,MBNL3,CNTRL,RRM2,KIF11,KNL1,LMNB1,NCAPG,GEN1,ARHGAP11B,CDK1,…
TF	Factor: E2F-1; motif: TWSGCGCGAAAAYKR; match class: 1	TF:M00024_1	0.00210218	2.67733	2717	662	135	20011	ADGRB3,ROBO2,FIGN,COL25A1,SHROOM3,TOX,MAN2A1,NHSL1,AHI1,PTPRM,ADAMTS3,MAGI3,COL11A1,GFRA1,FOXN4,PDE7B,ADD3,HYDIN,CTNNA3,TEX9,NUP62CL,MIS18BP1,MMS22L,LEF1,PKP4,DOK5,EFNA5,LRP2,RELN,LPAR1,SLC38A1,LRRTM4,FRAS1,PDE4D,TRPS1,KSR2,CPNE5,CCDC175,ALCAM,DSG2,RAD51B,JAZF1,RRAS2,HELLS,KNTC1,ATAD5,DTL,C21ORF58,NSD2,CHEK1,SH3GL3,CERKL,PLOD2,TTC29,TMEM45A,MAP7,FREM2,CCDC171,ADAM19,KITLG,ARHGAP24,LIN28B,CCDC148,…
TF	Factor: ZF5; motif: GGSGCGCGS; match class: 1	TF:M10438_1	0.00211823	2.67403	15212	855	708	20011	PCDH7,CNTN5,ROBO2,FIGN,COL25A1,MDK,AGBL4,LGR5,TOX,DNAH11,ZFHX4,MAN2A1,MAN1A1,SLF1,HHIP,AHI1,PTPRO,UTRN,CFAP299,DNAH14,PTPRM,COL23A1,FRMD4B,ADGRV1,TENM3,ADAMTS3,SPAG17,ANOS1,MAGI3,PLXNC1,EPHA6,KCNT2,COL11A1,NALCN,MDGA2,RFC3,COL13A1,GFRA1,FOXN4,TEKT1,DCDC1,ARHGAP6,ADGB,FRRS1L,SYNPO2,EGFR,GNAI1,SDK1,ADD3,ZNF730,KIRREL3,TBX5,PRAG1,CNTN3,PTPRN2,FBXL7,CTNNA3,NKAIN3,TEX9,TSHZ3,DPYD,PRTG,CEP112,NUP62CL,E…
TF	Factor: RNF96; motif: BCCCGCRGCC	TF:M01199	0.00263946	2.57848	8709	1229	617	20011	PCDH7,ROBO2,FIGN,MDK,TOX,MAN2A1,MAN1A1,SLF1,HHIP,AHI1,PTPRO,UTRN,PTPRM,FRMD4B,ADGRV1,ANOS1,PLXNC1,EPHA6,NALCN,MDGA2,COL13A1,GFRA1,FOXN4,ARHGAP6,FRRS1L,EGFR,GNAI1,SDK1,ADD3,ZNF730,HYDIN,PRAG1,PTPRN2,FBXL7,CTNNA3,NKAIN3,TEX9,TSHZ3,DPYD,PRTG,NUP62CL,EPB41L3,DIAPH3,TMEM132D,CYP1B1,FBN1,AMPH,CEP135,MAP1B,CDS1,SGSM1,ZFHX3,TMEM178A,CA8,LEF1,KIF26B,PKP4,RGS22,DOK5,CHST11,EFNA5,RALYL,CPAMD8,LRP2,FBN2,NPAS…
TF	Factor: E2F1; motif: NNNNNGCGSSAAAN; match class: 1	TF:M08874_1	0.0028653	2.54283	2208	1216	188	20011	MAN2A1,MAN1A1,SLF1,HHIP,AHI1,UTRN,DNAH14,COL23A1,MAGI3,PLXNC1,MDGA2,RFC3,FOXN4,SDK1,ADD3,ZNF730,PTPRN2,DPYD,CEP112,NUP62CL,CYP1B1,FBN1,CDS1,SPSB4,EFNA5,BOC,KCNB2,OPCML,LPAR1,ZIC1,SLC38A1,PDE4D,TRPS1,LZTFL1,CPNE5,HELLS,KNTC1,DTL,XRCC2,C21ORF58,ATAD2,TMPO,NSD2,FUT9,CXADR,CERKL,PAWR,KCNN2,ZNF732,KITLG,ARHGAP24,COLEC12,FMN2,ARSG,PPM1L,DOCK4,TRIM36,ZGRF1,GJC1,NXPH2,ELOVL6,COL21A1,PLSCR4,CACNA1C,USP53,…
TF	Factor: E2F-4:DP-2; motif: TTTCSCGC; match class: 1	TF:M00739_1	0.00346005	2.46092	1224	1214	116	20011	MAN2A1,COL23A1,RFC3,GFRA1,FOXN4,ZNF730,TEX9,NUP62CL,CYP1B1,EFNA5,BOC,ZIC1,SLC38A1,CCDC175,STK32B,HELLS,DTL,C21ORF58,TMPO,NSD2,CHEK1,CERKL,PAWR,KBTBD12,KITLG,MTBP,CACNA1C,UMAD1,SLC27A6,MBNL3,PLSCR1,CNTRL,EZH2,NUSAP1,E2F7,KIF20B,GEN1,BLM,ARHGAP11B,STIL,SKA3,RBL1,CDC7,ZNF367,SYNE2,MASTL,TUBA1B,CLSPN,DBF4,DLGAP5,PCLAF,UHRF1,RRM1,SHCBP1,OIP5,DHFR,SLCO3A1,STXBP5L,KCNQ5,CARMIL1,LIN9,CNKSR2,DMC1,USP37,CL…
TF	Factor: E2F-4; motif: NTTTCSCGCC; match class: 1	TF:M07380_1	0.0036378	2.43916	8209	1216	579	20011	PCDH7,ROBO2,COL25A1,AGBL4,TOX,MAN2A1,MAN1A1,SLF1,AHI1,PTPRO,UTRN,DNAH14,PTPRM,COL23A1,ADAMTS3,MAGI3,PLXNC1,COL11A1,MDGA2,RFC3,GFRA1,FOXN4,ARHGAP6,EGFR,SDK1,ADD3,TBX5,PTPRN2,FBXL7,NKAIN3,TEX9,DPYD,PRTG,NUP62CL,HMGCS1,MIS18BP1,DIAPH3,CENPK,MMS22L,PRKAA2,CYP1B1,FBN1,PLEKHG4B,AMPH,CEP135,MAP1B,CDS1,SGSM1,VRK2,ZFHX3,TMEM178A,CA8,LCA5,PKP4,SPSB4,EFNA5,FBN2,NPAS3,CADPS2,CNTNAP3B,BOC,RELN,KCNB2,LTBP1,OPC…
TF	Factor: ZXDL; motif: GSGSCNNGGGMRGCNCCGGGS; match class: 1	TF:M12722_1	0.00369378	2.43253	6819	1270	512	20011	CNTN5,ROBO2,FIGN,MDK,LGR5,TOX,MAN2A1,MAN1A1,HHIP,UTRN,DNAH14,PTPRM,COL23A1,FRMD4B,ADGRV1,ANOS1,MAGI3,PLXNC1,COL11A1,NALCN,MDGA2,COL13A1,GFRA1,FOXN4,FRRS1L,EGFR,GNAI1,SDK1,ADD3,ZNF730,TBX5,PRAG1,CNTN3,PTPRN2,FBXL7,NKAIN3,TSHZ3,PRTG,CEP112,EPB41L3,TMEM132D,PRKAA2,CYP1B1,PLEKHG4B,AMPH,CEP135,MAP1B,CDS1,SGSM1,ZFHX3,TMEM178A,CA8,LEF1,KIF26B,PKP4,RGS22,SPSB4,DOK5,CHST11,EFNA5,RALYL,CPAMD8,LRP2,NPAS3,CA…
TF	Factor: Egr-1; motif: GCGCATGCG	TF:M04869	0.00382645	2.4172	11515	863	564	20011	PCDH7,ADGRB3,CNTN5,FIGN,COL25A1,MDK,AGBL4,LGR5,DNAH11,MAN2A1,MAN1A1,HHIP,AHI1,PTPRO,CFAP299,DNAH14,PTPRM,COL23A1,FRMD4B,ANOS1,MAGI3,PLXNC1,EPHA6,NALCN,MDGA2,RFC3,COL13A1,GFRA1,FOXN4,TEKT1,FRRS1L,EGFR,GNAI1,SDK1,ADD3,PRAG1,CNTN3,PTPRN2,FBXL7,CTNNA3,NKAIN3,TEX9,TSHZ3,DPYD,PRTG,NUP62CL,EPB41L3,HMGCS1,MIS18BP1,MMS22L,TMEM132D,PRKAA2,CFAP54,FBN1,PLEKHG4B,ZBTB16,SCLT1,CEP135,MAP1B,SGSM1,ZFHX3,TMEM178A,…
TF	Factor: E2F; motif: GGCGSG	TF:M00803	0.00445775	2.35088	13497	1227	902	20011	PCDH7,CNTN5,ROBO2,FIGN,COL25A1,MDK,PLEKHG1,AGBL4,LGR5,TOX,DNAH11,ZFHX4,MAN2A1,MAN1A1,HHIP,AHI1,PTPRO,UTRN,COL9A1,DNAH14,PTPRM,COL23A1,FRMD4B,ADGRV1,TENM3,ADAMTS3,ANOS1,MAGI3,PLXNC1,EPHA6,NALCN,MDGA2,RFC3,COL13A1,GFRA1,FOXN4,ARHGAP6,ADGB,FRRS1L,EGFR,GNAI1,SDK1,ADD3,ZNF730,KIRREL3,PRAG1,CNTN3,PTPRN2,FBXL7,NKAIN3,TEX9,TSHZ3,DPYD,PRTG,CEP112,NUP62CL,EPB41L3,MIS18BP1,DIAPH3,CENPK,BRIP1,MMS22L,TMEM132D…
TF	Factor: LHX3; motif: ATTAAW; match class: 1	TF:M02097_1	0.00457736	2.33939	6551	548	232	20011	ADGRB3,CNTN5,ROBO2,FIGN,PLEKHG1,AGBL4,ESRRG,SHROOM3,DNAH11,ZFHX4,CFAP47,SLF1,PDLIM5,NHSL1,MEIS1,COL9A1,PALLD,CFAP299,DNAH14,PTPRM,MYO16,FRMD4B,SPAG17,KCNT2,NALCN,RFC3,TEKT1,DCDC1,ARHGAP6,PDE7B,SYNPO2,ZNF730,HYDIN,CP,TMEM232,CNTN3,S1PR3,FBXL7,TEX9,DPYD,PRTG,CEP112,EPB41L3,DIAPH3,BRIP1,MMS22L,PRKAA2,CLRN1,CFAP54,CALCRL,SCLT1,PLEKHA6,AMPH,DTNA,CEP135,ANK3,VRK2,LCA5,CEP128,PKP4,RGS22,DOK5,EFNA5,CNTNA…
TF	Factor: E2F-1; motif: TTTSGCGS	TF:M00431	0.00481665	2.31725	7456	1223	534	20011	PCDH7,COL25A1,MDK,TOX,ZFHX4,MAN2A1,CFAP47,SLF1,AHI1,UTRN,PTPRM,COL23A1,FRMD4B,TENM3,MAGI3,EPHA6,MDGA2,RFC3,COL13A1,GFRA1,FOXN4,TEKT1,ARHGAP6,FRRS1L,SDK1,ADD3,ZNF730,KIRREL3,TMEM232,PRAG1,CNTN3,FBXL7,CTNNA3,NKAIN3,TSHZ3,DPYD,CEP112,NUP62CL,MIS18BP1,CENPK,TMEM132D,CYP1B1,ZBTB16,SCLT1,SGSM1,LEF1,LCA5,RGS22,SPSB4,DOK5,CHST11,EFNA5,LRP2,FBN2,CNTNAP3B,NRIP1,RELN,KCNB2,LTBP1,ERC2,DAPL1,LPAR1,ZIC1,SLC38A…
TF	Factor: E2F-6; motif: NGGGCGGGARRNN; match class: 1	TF:M09895_1	0.00489845	2.30994	2793	1201	225	20011	MAN2A1,MAN1A1,SLF1,AHI1,ADAMTS3,MAGI3,KCNT2,GFRA1,ADD3,PTPRN2,TEX9,NUP62CL,MMS22L,PRKAA2,FBN1,PLEKHG4B,AMPH,CDS1,TMEM178A,PKP4,EFNA5,NPAS3,CNTNAP3B,BOC,KCNB2,IQGAP2,HIVEP2,STK32B,CPEB1,DSG2,MYO3A,RRAS2,FBLN7,XRCC2,C21ORF58,ATAD2,NSD2,CHEK1,GPC4,ANO1,PAWR,PLOD2,KITLG,CCDC148,CCDC30,SIMC1,ZRANB3,DCDC2,TEX15,RGS20,RASAL2,ITGA9,GJC1,BACE2,ELOVL6,TAFA2,LBR,CRTAC1,KCNMB4,UMAD1,NRK,SMAD3,CEMIP2,MBNL3,TT…
TF	Factor: DP-1; motif: NRNNGGCGGGAANN; match class: 1	TF:M10098_1	0.00548246	2.26102	2229	1201	186	20011	PCDH7,MDK,TOX,MAN2A1,MAN1A1,AHI1,COL23A1,KCNT2,COL11A1,GFRA1,ADD3,NUP62CL,HMGCS1,DIAPH3,FBN1,AMPH,CDS1,TMEM178A,LCA5,PKP4,EFNA5,KCNB2,IQGAP2,HIVEP2,STK32B,DSG2,MYO3A,JAZF1,RRAS2,FBLN7,XRCC2,C21ORF58,ATAD2,NSD2,PAWR,ZNF732,KITLG,CCDC148,CCDC30,FANCB,SIMC1,ENKUR,TTLL9,RGS20,FHIT,RASAL2,GJC1,SPEF2,ELOVL6,LBR,KCNMB4,UMAD1,NRK,CEMIP2,TTC6,CNTRL,EZH2,LMNB1,MKI67,E2F7,RAD51AP1,BLM,VRK1,CENPI,MND1,PLK4,S…
TF	Factor: ZF5; motif: GSGCGCGR; match class: 1	TF:M00716_1	0.00636545	2.19617	14451	855	676	20011	PCDH7,CNTN5,ROBO2,FIGN,COL25A1,MDK,AGBL4,LGR5,TOX,DNAH11,ZFHX4,MAN2A1,MAN1A1,SLF1,NHSL1,HHIP,AHI1,PTPRO,UTRN,CFAP299,DNAH14,PTPRM,COL23A1,FRMD4B,ADGRV1,TENM3,ADAMTS3,SPAG17,ANOS1,MAGI3,PLXNC1,EPHA6,KCNT2,COL11A1,NALCN,MDGA2,RFC3,COL13A1,GFRA1,FOXN4,ARHGAP6,ADGB,FRRS1L,EGFR,GNAI1,SDK1,ADD3,ZNF730,TBX5,TMEM232,PRAG1,CNTN3,PTPRN2,FBXL7,CTNNA3,NKAIN3,TSHZ3,DPYD,PRTG,CEP112,NUP62CL,EPB41L3,HMGCS1,MIS1…
TF	Factor: FPM315; motif: GGAGGAGGRRGRGGRGGRRGR; match class: 1	TF:M07141_1	0.00693457	2.15898	898	428	42	20011	PCDH7,DNAH11,ADGRV1,EPHA6,MDGA2,COL13A1,TEKT1,ARHGAP6,TSHZ3,AMPH,MAP1B,ZFHX3,DOK5,NPAS3,BOC,KCNB2,ZIC1,NR2F1,TRPS1,KSR2,HIVEP2,RBMS1,NR2F2,CHEK1,ZNF423,LDB2,GNG12,RBPMS,ANKS1B,ZBBX,FAM171B,COTL1,C10ORF67,ZC3H12B,PARP8,ANKRD30BL,ASIC2,SMAD3,CEMIP2,LURAP1L,MBNL3,MMP16
TF	Factor: TAFII250; motif: RARRWGGCGGMGGNGR; match class: 1	TF:M10086_1	0.00696653	2.15698	4057	1200	308	20011	FIGN,MDK,TOX,DNAH11,PTPRO,COL23A1,MAGI3,EPHA6,MDGA2,COL13A1,TEKT1,ARHGAP6,EGFR,SDK1,ADD3,FBXL7,TSHZ3,PRTG,PRKAA2,CYP1B1,FBN1,MAP1B,CDS1,SGSM1,ZFHX3,CA8,LEF1,PKP4,SPSB4,DOK5,EFNA5,RALYL,LRP2,FBN2,NPAS3,BOC,NRIP1,RELN,KCNB2,NR2F1,HMX1,TRPS1,KSR2,HIVEP2,ADARB2,ALCAM,NEK5,RBMS1,JAZF1,NR2F2,KNTC1,DTL,C21ORF58,ATAD2,NSD2,COL19A1,CFAP69,GPC4,CERKL,ZNF423,KATNAL2,PAWR,KCNN2,PLPP4,GNG12,PLEKHH2,ADAM19,PCN…
TF	Factor: E2F-3; motif: NNGGCGGGAAA; match class: 1	TF:M09893_1	0.00790504	2.1021	1364	1216	125	20011	MAN2A1,MAN1A1,SLF1,COL23A1,RFC3,GFRA1,FOXN4,SDK1,ADD3,NUP62CL,DIAPH3,MMS22L,TMEM178A,PKP4,NPAS3,OPCML,SLC38A1,TRPS1,HIVEP2,STK32B,MYO3A,KNTC1,XRCC2,NSD2,PAWR,KBTBD12,KITLG,CCDC148,CCDC30,ANKH,SIMC1,MTBP,TEX15,RASAL2,GJC1,ELOVL6,PLSCR4,UMAD1,NRK,CNTRL,EZH2,LMNB1,GEN1,BLM,CEP192,MSH5,BARD1,BRCA1,RBL1,CDC7,NDUFAF6,NCAPG2,SYNE2,TUBA1B,TUBB,HMGB2,CLSPN,DBF4,FANCA,UHRF1,RRM1,SKA2,ST3GAL6,DDB2,KCNQ5,EDA…
TF	Factor: E2F1; motif: GSGCGGGAAN; match class: 1	TF:M12597_1	0.00950374	2.02211	10130	1227	699	20011	PCDH7,ROBO2,FIGN,MDK,AGBL4,TOX,DNAH11,MAN2A1,MAN1A1,SLF1,AHI1,PTPRM,COL23A1,FRMD4B,ADAMTS3,ANOS1,MAGI3,PLXNC1,EPHA6,KCNT2,COL11A1,NALCN,MDGA2,RFC3,GFRA1,FOXN4,TEKT1,DCDC1,ADGB,EGFR,GNAI1,SDK1,ADD3,TBX5,PTPRN2,NKAIN3,TEX9,TSHZ3,DPYD,PRTG,CEP112,NUP62CL,EPB41L3,HMGCS1,MIS18BP1,DIAPH3,MMS22L,PRKAA2,CYP1B1,FBN1,PLEKHG4B,ZBTB16,SCLT1,AMPH,CEP135,MAP1B,CDS1,SGSM1,ZFHX3,TMEM178A,CA8,LEF1,LCA5,PKP4,SPSB4…
TF	Factor: B-Myb; motif: NTAACSGTYRN	TF:M11725	0.00980529	2.00854	874	1242	89	20011	FOXN4,PDE7B,ADD3,PTPRN2,FBXL7,TEX9,CEP112,CENPK,CYP1B1,CEP135,LEF1,LTBP1,IFITM2,CCDC175,CPEB1,DTL,COL19A1,MIPOL1,ENKUR,AFF3,SPEF2,CLYBL,ANKRD30BL,NRK,AKAP12,EZH2,NCAPG,RAD51AP1,VRK1,CCDC18,BUB1B,STIL,TTK,CENPU,BARD1,RBL1,PRIM2,CENPJ,TUBA1B,TUBB,ESCO2,CLSPN,KIAA0586,SOX11,SLCO3A1,EMID1,LIN9,CNKSR2,ARHGAP19,IKBIP,ICA1L,RBBP8,CCDC39,CPQ,CDKN3,WDR62,HMMR,ST3GAL3,FBXO43,CCNA1,B4GALT6,NME9,TFAP2D,MPP6,…
TF	Factor: ZNF773; motif: GGGTGGCCGC	TF:M06377	0.00985498	2.00634	280	388	19	20011	ADGRV1,CTNNA3,ZFHX3,LEF1,DOK5,KCNB2,LTBP1,HMX1,IQGAP2,NEK5,ELMO1,NR2F2,CXADR,RASGRF2,FHIT,MGLL,BACE2,SLCO5A1,CRTAC1
TF	Factor: ZNF419; motif: GGGTGGCCGC	TF:M06576	0.00985498	2.00634	280	388	19	20011	ADGRV1,CTNNA3,ZFHX3,LEF1,DOK5,KCNB2,LTBP1,HMX1,IQGAP2,NEK5,ELMO1,NR2F2,CXADR,RASGRF2,FHIT,MGLL,BACE2,SLCO5A1,CRTAC1
TF	Factor: E2F; motif: NNTTTCGCGCN; match class: 1	TF:M08875_1	0.0113983	1.94316	1776	590	86	20011	PCDH7,FIGN,SLF1,HHIP,COL23A1,FRMD4B,MAGI3,RFC3,FOXN4,PTPRN2,FBXL7,CTNNA3,DPYD,CEP112,NUP62CL,CENPK,CYP1B1,CDS1,LEF1,SPSB4,EFNA5,KCNB2,LPAR1,ZIC1,SLC38A1,CNTNAP3,TRPS1,LZTFL1,CPNE5,HELLS,KNTC1,ATAD5,DTL,C21ORF58,ATAD2,TMPO,NSD2,CHEK1,FUT9,CXADR,GPC4,CERKL,ZNF732,ARHGAP24,COLEC12,FMN2,ARSG,DOCK4,ZGRF1,NXPH2,STEAP2,COL21A1,CACNA1C,KCNMB4,USP53,UMAD1,MAP3K20,NRK,MBNL3,CNTRL,RUNDC3B,SMC4,LMNB1,GEN1,CE…
TF	Factor: E2F-1:DP-2; motif: TTTSSCGC	TF:M00737	0.0117162	1.93121	8930	887	462	20011	PCDH7,ADGRB3,ROBO2,COL25A1,SHROOM3,LGR5,DNAH11,MAN2A1,CFAP47,MAN1A1,SLF1,AHI1,CFAP299,PTPRM,COL23A1,ADAMTS3,ANOS1,MAGI3,EPHA6,KCNT2,MDGA2,RFC3,GFRA1,FOXN4,FRRS1L,SDK1,ZNF730,HYDIN,TBX5,TMEM232,CNTN3,FBXL7,CTNNA3,NKAIN3,TEX9,DPYD,CEP112,NUP62CL,EPB41L3,DIAPH3,BRIP1,MMS22L,CFAP54,CYP1B1,FBN1,PLEKHG4B,ZBTB16,SCLT1,CDS1,SGSM1,ZFHX3,LEF1,KIF26B,PKP4,SPSB4,DOK5,CHST11,EFNA5,RALYL,CPAMD8,LRP2,CADPS2,CNT…
TF	Factor: FPM315; motif: GGGAGGAGGRRGRGGRGGRR; match class: 1	TF:M10134_1	0.0125628	1.90091	602	202	20	20011	PCDH7,EPHA6,MDGA2,COL13A1,TEKT1,ARHGAP6,TSHZ3,AMPH,MAP1B,DOK5,NPAS3,BOC,KCNB2,OPCML,ZIC1,NR2F1,KSR2,HIVEP2,RBMS1,NR2F2
TF	Factor: HMGXB3; motif: NRGCCAATSRGNRNNS	TF:M12616	0.0136348	1.86535	2915	965	191	20011	ESRRG,MAN2A1,CFAP47,NHSL1,KCNT2,SDK1,ADD3,TMEM232,NUP62CL,HMGCS1,LCA5,PKP4,CDH6,ZIC1,HMX1,SYNPR,ALCAM,RAD51B,NR2F2,DTL,C21ORF58,ATAD2,NSD2,KANK1,KCNN2,ZNF732,TMEM45A,PLEKHH2,FREM2,IGFBPL1,CCDC148,EFCAB6,ZNF99,TMEM241,ZRANB3,DCDC2,WIPF1,ABCA5,CEP126,ZNF90,COTL1,LRRIQ1,TAFA4,GUCY1B1,PLSCR4,GSTO2,LBR,CRTAC1,UMAD1,ZNF257,MYO5C,CDKL2,EZH2,MELK,ASPM,TOP2A,E2F7,KIF20B,BLM,VRK1,CENPI,ECT2,KIF14,TPX2,DEPD…
TF	Factor: E2F-1; motif: NTTTCGCGCS	TF:M00940	0.01843	1.73447	8001	1222	563	20011	PCDH7,ROBO2,COL25A1,LGR5,TOX,DNAH11,MAN2A1,MAN1A1,SLF1,HHIP,AHI1,UTRN,DNAH14,PTPRM,COL23A1,FRMD4B,MAGI3,PLXNC1,MDGA2,RFC3,COL13A1,GFRA1,FOXN4,ARHGAP6,FRRS1L,SDK1,ADD3,ZNF730,KIRREL3,TBX5,TMEM232,CNTN3,PTPRN2,FBXL7,CTNNA3,NKAIN3,TSHZ3,DPYD,PRTG,CEP112,NUP62CL,MIS18BP1,DIAPH3,CENPK,TMEM132D,PRKAA2,CFAP54,CYP1B1,FBN1,ZBTB16,SCLT1,CDS1,SGSM1,ZFHX3,TMEM178A,LEF1,PKP4,SPSB4,DOK5,CHST11,EFNA5,LRP2,FBN2,…
TF	Factor: E2F; motif: NCSCGCSAAAN	TF:M00919	0.020393	1.69052	6315	1180	442	20011	PCDH7,ROBO2,COL25A1,MDK,ZFHX4,MAN2A1,CFAP47,SLF1,AHI1,UTRN,PTPRM,COL23A1,FRMD4B,TENM3,MAGI3,MDGA2,RFC3,COL13A1,GFRA1,DCDC1,FRRS1L,SDK1,ADD3,ZNF730,HYDIN,TBX5,TMEM232,PRAG1,CNTN3,FBXL7,CTNNA3,NKAIN3,CEP112,NUP62CL,MIS18BP1,DIAPH3,CENPK,TMEM132D,PRKAA2,CYP1B1,ZBTB16,SCLT1,CDS1,SGSM1,CA8,LCA5,PKP4,SPSB4,EFNA5,LRP2,FBN2,CNTNAP3B,KCNB2,DAPL1,LPAR1,ZIC1,SLC38A1,FRAS1,CNTNAP3,LHX9,TRPS1,LZTFL1,KSR2,CPNE…
TF	Factor: E2F-1; motif: NTTTCGCGCS; match class: 1	TF:M00940_1	0.0315467	1.50105	2695	596	118	20011	PCDH7,COL25A1,TOX,SLF1,HHIP,COL23A1,MAGI3,MDGA2,RFC3,GFRA1,FOXN4,SDK1,PTPRN2,FBXL7,CTNNA3,NKAIN3,TSHZ3,DPYD,CEP112,NUP62CL,CENPK,CYP1B1,ZBTB16,CDS1,SPSB4,EFNA5,KCNB2,LPAR1,ZIC1,SLC38A1,TRPS1,LZTFL1,CPNE5,MYO3A,HELLS,KNTC1,DTL,C21ORF58,ATAD2,TMPO,NSD2,CHEK1,SH3GL3,ANO1,CERKL,PAWR,ZNF732,KITLG,ARHGAP24,TBX20,COLEC12,CCDC30,SIMC1,FMN2,ARSG,DOCK4,ZGRF1,STEAP2,COL21A1,CACNA1C,KCNMB4,USP53,ONECUT1,UMAD…
TF	Factor: ALX3; motif: NNYAATTANN	TF:M04279	0.0319471	1.49557	3925	492	136	20011	ADGRB3,ROBO2,FIGN,PLEKHG1,DNAH11,ZFHX4,PDLIM5,NHSL1,COL9A1,PALLD,CFAP299,ADAMTS3,PLXNC1,KCNT2,COL11A1,NALCN,MDGA2,DCDC1,PDE7B,SYNPO2,GNAI1,ZNF730,KIRREL3,HYDIN,CP,S1PR3,CTNNA3,NKAIN3,TEX9,DPYD,PRTG,CEP112,DIAPH3,PRKAA2,CLRN1,CALCRL,PLEKHG4B,PLEKHA6,CEP135,MAP1B,VRK2,ZFHX3,CEP128,RGS22,DOK5,CNTNAP3B,CDH6,ERC2,DAPL1,CNTNAP3,PDE4D,NPFFR2,CACNB2,CAMK4,CYYR1,CCDC175,ADARB2,CLVS2,ELMO1,NR2F2,GLYATL2,TM…
TF	Factor: E2F; motif: TTTSGCGSG	TF:M00939	0.033703	1.47233	6604	1180	458	20011	PCDH7,ROBO2,COL25A1,MDK,PLEKHG1,ZFHX4,MAN2A1,CFAP47,SLF1,AHI1,UTRN,PTPRM,COL23A1,FRMD4B,TENM3,MAGI3,MDGA2,RFC3,COL13A1,GFRA1,DCDC1,ARHGAP6,FRRS1L,SDK1,ADD3,ZNF730,HYDIN,TBX5,TMEM232,PRAG1,CNTN3,FBXL7,CTNNA3,NKAIN3,DPYD,CEP112,NUP62CL,MIS18BP1,DIAPH3,CENPK,TMEM132D,PRKAA2,CYP1B1,ZBTB16,SCLT1,CDS1,SGSM1,CA8,LCA5,PKP4,SPSB4,EFNA5,LRP2,FBN2,CNTNAP3B,KCNB2,ERC2,DAPL1,LPAR1,ZIC1,SLC38A1,FRAS1,CNTNAP3,L…
TF	Factor: Dlx-5; motif: NNRGYAATTRNYKNNN; match class: 1	TF:M01388_1	0.0343847	1.46364	5758	643	235	20011	PCDH7,ADGRB3,KIAA1217,ROBO2,FIGN,PLEKHG1,ESRRG,SHROOM3,ZFHX4,MAN1A1,PDLIM5,NHSL1,AHI1,PTPRO,COL9A1,PALLD,DNAH14,FRMD4B,ADGRV1,ADAMTS3,PLXNC1,KCNT2,COL11A1,MDGA2,FOXN4,DCDC1,ADGB,FRRS1L,PDE7B,SYNPO2,GNAI1,KIRREL3,HYDIN,TBX5,CP,CNTN3,FBXL7,CTNNA3,TEX9,DPYD,CEP112,DIAPH3,CENPK,PRKAA2,CLRN1,CALCRL,PLEKHG4B,PLEKHA6,CEP135,MAP1B,SGSM1,VRK2,ZFHX3,CEP128,RGS22,DOK5,CNTNAP3B,PTPRQ,CDH6,DAPL1,LRRTM4,CNTNAP…
TF	Factor: E2F-7; motif: GRGGCGGGAANNN; match class: 1	TF:M09896_1	0.0349123	1.45702	4642	1216	345	20011	PCDH7,MDK,TOX,MAN2A1,MAN1A1,SLF1,AHI1,COL23A1,ADAMTS3,MAGI3,EPHA6,KCNT2,COL11A1,GFRA1,ARHGAP6,EGFR,ADD3,TBX5,PTPRN2,NKAIN3,TEX9,TSHZ3,NUP62CL,HMGCS1,DIAPH3,PRKAA2,FBN1,PLEKHG4B,AMPH,CDS1,TMEM178A,LCA5,PKP4,EFNA5,NPAS3,CNTNAP3B,BOC,KCNB2,IQGAP2,KSR2,HIVEP2,STK32B,CPEB1,DSG2,MYO3A,JAZF1,RRAS2,FBLN7,XRCC2,C21ORF58,ATAD2,NSD2,CHEK1,FUT9,GPC4,ANO1,PAWR,WASF3,PLOD2,KCNN2,GNG12,ZNF732,COL6A6,MAP7,KITLG,…
TF	Factor: E2F; motif: TTTSGCGSG	TF:M00918	0.0394339	1.40413	5733	622	227	20011	PCDH7,ROBO2,COL25A1,MDK,PLEKHG1,ZFHX4,MAN2A1,CFAP47,AHI1,UTRN,COL23A1,TENM3,MAGI3,MDGA2,RFC3,COL13A1,GFRA1,SDK1,ADD3,ZNF730,HYDIN,TBX5,TMEM232,PRAG1,CTNNA3,NKAIN3,CEP112,NUP62CL,HMGCS1,MIS18BP1,DIAPH3,CENPK,TMEM132D,PRKAA2,CYP1B1,PLEKHG4B,ZBTB16,SCLT1,CDS1,SGSM1,CA8,LCA5,SPSB4,EFNA5,LRP2,FBN2,CNTNAP3B,LPAR1,ZIC1,FRAS1,CNTNAP3,LHX9,TRPS1,LZTFL1,KSR2,CPNE5,CYYR1,ADARB2,CPEB1,RAD51B,PDE10A,TTC39C,PP…
MIRNA	hsa-miR-215-5p	MIRNA:hsa-miR-215-5p	7.21847e-21	20.1416	755	850	117	14850	SLF1,MIS18BP1,CENPK,BRIP1,FBN1,CA8,CEP128,PKP4,CADPS2,CNTNAP3,CAMK4,ALCAM,ATAD5,DTL,BRCA2,ATAD2,TMPO,NSD2,GPC4,PAWR,KIF5C,MIPOL1,CCDC150,RADX,FAM171B,EFCAB11,KCNMB4,ARHGAP29,CEMIP2,C18ORF54,SMC4,RTKN2,KIF15,KNL1,LMNB1,ASPM,MKI67,KIF20B,GEN1,BLM,NUF2,CENPI,ECT2,KIF14,APOLD1,ANLN,BUB1B,KIF18A,KIF23,CIT,KIF24,CENPF,PLK4,STIL,NEIL3,CENPE,TTK,KIFC1,RACGAP1,SMC2,CKAP2L,BARD1,BRCA1,CDC7,MCM10,RAD21,NUCK…
MIRNA	hsa-miR-192-5p	MIRNA:hsa-miR-192-5p	1.60806e-20	19.7937	990	1028	156	14850	PCDH7,SLF1,NHSL1,HMGCS1,MIS18BP1,CENPK,BRIP1,PRKAA2,FBN1,CA8,CEP128,PKP4,CADPS2,CNTNAP3,CAMK4,ALCAM,ATAD5,DTL,BRCA2,ATAD2,TMPO,NSD2,POLQ,GPC4,PAWR,KIF5C,MIPOL1,CCDC150,SPARC,RADX,FAM171B,FANCM,EFCAB11,KCNMB4,ARHGAP29,CEMIP2,MBNL3,C18ORF54,SMC4,RTKN2,KIF15,KNL1,LMNB1,ASPM,MKI67,KIF20B,GEN1,BLM,CCDC18,NUF2,CENPI,ECT2,KIF14,APOLD1,ANLN,BUB1B,KIF18A,KIF23,CIT,KIF24,CENPF,PLK4,STIL,NEIL3,CENPE,TTK,RAC…
MIRNA	hsa-miR-193b-3p	MIRNA:hsa-miR-193b-3p	1.77615e-06	5.75052	847	855	92	14850	PLXNC1,LEF1,CEP128,NMD3,HELLS,KNTC1,ATAD2,NSD2,POLQ,CHEK1,IL17RD,COTL1,FANCM,SMAD3,RRM2,EZH2,RTKN2,KIF15,MELK,KIF11,LMNB1,NCAPG,ASPM,TOP2A,NDC80,BLM,ECT2,TPX2,APOLD1,BUB1B,MND1,CDK1,SKA3,BUB1,SGO1,RACGAP1,EXO1,CKAP2L,CDCA2,CENPU,BARD1,BRCA1,RBL1,FANCD2,CENPJ,MYBL1,POLE2,FANCI,MCM10,SYNE2,TUBA1B,TUBB,NUCKS1,HP1BP3,TACC3,FANCA,ARHGAP11A,PCLAF,FBXO5,SHCBP1,OIP5,MCM8,TMTC1,TUBB3,UCHL1,TDP1,DSCC1,SHIS…
HP	Congenital miosis	HP:0007728	0.0252366	1.59797	2	20	2	4851	COL25A1,ZFHX4
HP	Congenital facial diplegia	HP:0007188	0.0252366	1.59797	2	20	2	4851	COL25A1,ZFHX4

## Sheet: Module 3 GO
source	term_name	term_id	adjusted_p_value	negative_log10_of_adjusted_p_value	term_size	query_size	intersection_size	effective_domain_size	intersections
GO:MF	structural constituent of ribosome	GO:0003735	1.57556e-29	28.8026	451	726	79	20195	RPS4Y1,RPS26,RPL7,RPL10,RPS16,RPS11,RPL7A,RPL19,RPL13A,RPS3A,RPL3,RPS27A,RPLP0,RPL15,RPL11,RPLP1,RPL27A,RPS13,RPS10,RPL28,RPL18A,RPS15,RPS9,RPS28,RPL18,RPL24,FAU,RPL6,RPL10A,RPL29,RPS7,RPL5,RPS18,RPS14,RPL30,RPL9,RPL13,RPL8,RPS5,RPSA,RPS24,RPL32,RPS25,RPS6,RPL41,RPS27,RPL17,RPS23,RPL4,RPS3,RPL22,RPLP2,RPS20,RPL37A,RPS19,UBA52,RPL14,RPL35,RPS8,RPS12,RPL12,RPL23,RPS15A,RPL36,RPL26,RPL27,RPS29,RPL35…
GO:MF	structural molecule activity	GO:0005198	4.51101e-13	12.3457	1107	726	96	20195	DST,LAMA1,LUM,ABI3BP,MPZ,RPS4Y1,ZPLD1,RPS26,BFSP1,CAPN3,SNTB1,CTNNA2,CRYAB,APOE,IMPG2,CCN1,RPL7,RPL10,RPS16,RPS11,RPL7A,RPL19,RPL13A,RPS3A,RPL3,RPS27A,RPLP0,RPL15,RPL11,RPLP1,RPL27A,RPS13,RPS10,RPL28,RPL18A,RPS15,RPS9,RPS28,RPL18,RPL24,FAU,RPL6,RPL10A,RPL29,RPS7,RPL5,RPS18,RPS14,RPL30,RPL9,RPL13,RPL8,RPS5,RPSA,RPS24,RPL32,RPS25,RPS6,RPL41,RPS27,RPL17,RPS23,RPL4,RPS3,RPL22,RPLP2,ACTB,RPS20,RPL37A,…
GO:MF	rRNA binding	GO:0019843	2.53829e-10	9.59546	69	747	20	20195	RPS4Y1,RPS11,RPL3,RPLP0,RPL11,RPS13,RPS9,RPL5,RPS18,RPS14,RPL9,RPL8,RPS5,RPS3,RPL12,RPL23,RPS4X,RPL23A,RPL37,NOP53
GO:MF	ubiquitin ligase inhibitor activity	GO:1990948	1.61044e-06	5.79306	9	719	7	20195	RPL11,RPS15,RPS7,RPL5,RPS20,RPL23,RPL37
GO:MF	ubiquitin-protein transferase inhibitor activity	GO:0055105	5.20262e-06	5.28378	10	719	7	20195	RPL11,RPS15,RPS7,RPL5,RPS20,RPL23,RPL37
GO:MF	sialyltransferase activity	GO:0008373	0.00458236	2.33891	21	121	4	20195	ST3GAL1,ST8SIA5,ST8SIA1,ST6GAL2
GO:MF	cell adhesion molecule binding	GO:0050839	0.00459311	2.33789	562	726	42	20195	CADM1,DST,LRRC4C,FAP,CNTN1,FRMD5,PRKCA,CDH23,NRG1,ZC3HAV1,ITGB5,MPP7,CDH4,NLGN1,RPS26,NLGN4Y,PTN,ESYT2,NRXN3,NFASC,CTNNA2,COBLL1,ADAM23,PTPN11,CBL,CDH18,CCN1,CDH20,HMGB1,RPL7A,EEF1G,RPL15,RPL24,RPL6,RPL29,RACK1,RPSA,RPL14,EEF2,RPL23A,RPL34,RPS2
GO:MF	mRNA 5'-UTR binding	GO:0048027	0.0139172	1.85645	26	695	7	20195	RPS3A,RPS13,RPS7,RPL5,RPS14,RPL41,RPL26
GO:MF	ubiquitin-protein transferase regulator activity	GO:0055106	0.0173154	1.76157	26	719	7	20195	RPL11,RPS15,RPS7,RPL5,RPS20,RPL23,RPL37
GO:MF	molecular function inhibitor activity	GO:0140678	0.0177163	1.75163	739	865	56	20195	RASGRP1,ARHGEF3,RASGEF1B,CALM1,PLCE1,NEDD4L,ID2,DOCK10,SPOCK1,ARHGEF28,CCDC88C,CARD18,PPP1R1C,PDC,PCP2,TIAM1,EGF,PTN,WNK2,ITSN1,PDE6H,FRY,SH2D3C,ARHGEF37,RPS6KA3,CYTH1,FGD3,MRTFA,ARFGEF3,STX8,ITSN2,SMAD6,RAPGEF4,TAOK3,A2M,GAPDH,RPL11,RPS15,RPS7,RPL5,RACK1,RPS20,RPL23,DOCK5,RPL37,EEF1B2,TAF3,PHACTR2,SET,DOCK11,ARHGEF11,PRKAR2A,SAG,EIF2B3,GRM7,DOCK9
GO:MF	transmitter-gated monoatomic ion channel activity involved in regulation of postsynaptic membrane potential	GO:1904315	0.0225021	1.64778	58	22	3	20195	GABRG3,GRIK2,GRID2
GO:MF	neurotransmitter receptor activity involved in regulation of postsynaptic membrane potential	GO:0099529	0.0249202	1.60345	60	22	3	20195	GABRG3,GRIK2,GRID2
GO:MF	gamma-aminobutyric acid:sodium:chloride symporter activity	GO:0005332	0.0295569	1.52934	5	334	3	20195	SLC6A1,SLC6A11,SLC6A12
GO:MF	transmitter-gated monoatomic ion channel activity	GO:0022824	0.0316972	1.49898	65	22	3	20195	GABRG3,GRIK2,GRID2
GO:MF	transmitter-gated channel activity	GO:0022835	0.0316972	1.49898	65	22	3	20195	GABRG3,GRIK2,GRID2
GO:MF	chemorepellent activity	GO:0045499	0.032259	1.49135	28	730	7	20195	SEMA5B,NRG1,SEMA6A,SEMA5A,EPHA7,SEMA6D,SEMA3A
GO:MF	guanyl-nucleotide exchange factor activity	GO:0005085	0.0423697	1.37294	232	865	24	20195	RASGRP1,ARHGEF3,RASGEF1B,PLCE1,DOCK10,ARHGEF28,CCDC88C,PCP2,TIAM1,EGF,ITSN1,SH2D3C,ARHGEF37,CYTH1,FGD3,ARFGEF3,ITSN2,RAPGEF4,DOCK5,EEF1B2,DOCK11,ARHGEF11,EIF2B3,DOCK9
GO:MF	amyloid-beta binding	GO:0001540	0.0430553	1.36597	84	525	10	20195	APBB2,SCARB1,NLGN1,GSAP,CACNA1B,GRIA4,CRYAB,SORL1,APOE,APBA1
GO:MF	extracellular ligand-gated monoatomic ion channel activity	GO:0005230	0.046743	1.33028	74	22	3	20195	GABRG3,GRIK2,GRID2
GO:MF	postsynaptic neurotransmitter receptor activity	GO:0098960	0.0486563	1.31286	75	22	3	20195	GABRG3,GRIK2,GRID2
GO:BP	cytoplasmic translation	GO:0002181	1.4839e-73	72.8286	160	755	83	21110	CPEB4,RPS26,DPH6,RPL7,RPL10,RPS16,RPS11,RPL7A,RPL19,RPL13A,RPS3A,RPL3,RPS27A,RPLP0,RPL15,RPL11,RPLP1,RPL27A,RPS13,RPS10,RPL28,RPL18A,RPS15,RPS9,RPS28,RPL18,RPL24,FAU,RPL6,RPL10A,RPL29,RPS7,RPL5,RPS18,RPS14,RPL30,RPL9,RPL13,RPL8,RACK1,RPS5,RPSA,RPS24,RPL32,RPS25,RPS6,RPL41,RPS27,RPL17,RPS23,RPL4,RPS3,RPL22,RPLP2,RPS20,RPL37A,RPS19,UBA52,RPL14,RPL35,RPS8,RPS12,RPL12,RPL23,RPS15A,RPL36,RPL26,RPL27,R…
GO:BP	peptide metabolic process	GO:0006518	1.18858e-24	23.925	898	755	106	21110	PCSK2,PCSK5,CPEB4,BTG2,PCSK6,RPS4Y1,RPS26,PRR16,GSAP,ABCG1,DPH6,RPS6KA3,MME,ABCB9,EIF1AY,SORL1,APOE,SLC7A11,IDE,RPL7,RPL10,RPS16,RPS11,GAPDH,RPL7A,RPL19,RPL13A,EEF1A1,RPS3A,RPL3,RPS27A,EEF1G,RPLP0,RPL15,RPL11,RPLP1,RPL27A,RPS13,RPS10,RPL28,RPL18A,RPS15,RPS9,RPS28,RPL18,RPL24,FAU,RPL6,RPL10A,RPL29,RPS7,RPL5,RPS18,RPS14,RPL30,RPL9,RPL13,RPL8,RACK1,RPS5,NACA,RPSA,RPS24,RPL32,RPS25,RPS6,RPL41,RPS27,R…
GO:BP	translation	GO:0006412	2.6519e-24	23.5764	745	755	95	21110	CPEB4,BTG2,RPS4Y1,RPS26,PRR16,DPH6,RPS6KA3,EIF1AY,RPL7,RPL10,RPS16,RPS11,GAPDH,RPL7A,RPL19,RPL13A,EEF1A1,RPS3A,RPL3,RPS27A,EEF1G,RPLP0,RPL15,RPL11,RPLP1,RPL27A,RPS13,RPS10,RPL28,RPL18A,RPS15,RPS9,RPS28,RPL18,RPL24,FAU,RPL6,RPL10A,RPL29,RPS7,RPL5,RPS18,RPS14,RPL30,RPL9,RPL13,RPL8,RACK1,RPS5,NACA,RPSA,RPS24,RPL32,RPS25,RPS6,RPL41,RPS27,RPL17,RPS23,RPL4,RPS3,RPL22,RPLP2,RPS20,RPL37A,RPS19,UBA52,RPL1…
GO:BP	peptide biosynthetic process	GO:0043043	2.73679e-24	23.5628	774	755	97	21110	PCSK5,CPEB4,BTG2,RPS4Y1,RPS26,PRR16,DPH6,RPS6KA3,EIF1AY,SLC7A11,RPL7,RPL10,RPS16,RPS11,GAPDH,RPL7A,RPL19,RPL13A,EEF1A1,RPS3A,RPL3,RPS27A,EEF1G,RPLP0,RPL15,RPL11,RPLP1,RPL27A,RPS13,RPS10,RPL28,RPL18A,RPS15,RPS9,RPS28,RPL18,RPL24,FAU,RPL6,RPL10A,RPL29,RPS7,RPL5,RPS18,RPS14,RPL30,RPL9,RPL13,RPL8,RACK1,RPS5,NACA,RPSA,RPS24,RPL32,RPS25,RPS6,RPL41,RPS27,RPL17,RPS23,RPL4,RPS3,RPL22,RPLP2,RPS20,RPL37A,RP…
GO:BP	amide biosynthetic process	GO:0043604	7.34683e-23	22.1339	913	755	104	21110	ST3GAL1,PCSK5,CPEB4,SPTLC3,BTG2,RPS4Y1,RPS26,PRR16,DPH6,ACSL6,SGMS1,RPS6KA3,ST8SIA4,EIF1AY,CERS4,SLC7A11,CCN1,RPL7,RPL10,RPS16,RPS11,GAPDH,RPL7A,RPL19,RPL13A,EEF1A1,RPS3A,RPL3,RPS27A,EEF1G,RPLP0,RPL15,RPL11,RPLP1,RPL27A,RPS13,RPS10,RPL28,RPL18A,RPS15,RPS9,RPS28,RPL18,RPL24,FAU,RPL6,RPL10A,RPL29,RPS7,RPL5,RPS18,RPS14,RPL30,RPL9,RPL13,RPL8,RACK1,RPS5,NACA,RPSA,RPS24,RPL32,RPS25,RPS6,RPL41,RPS27,RPL…
GO:BP	amide metabolic process	GO:0043603	7.87387e-20	19.1038	1196	755	116	21110	ST3GAL1,PCSK2,PCSK5,CPEB4,SPTLC3,BTG2,PCSK6,RPS4Y1,RPS26,PRR16,GSAP,ABCG1,PLAAT3,PLPP1,DPH6,ACSL6,SGMS1,RPS6KA3,MME,ST8SIA4,ABCB9,EIF1AY,SORL1,APOE,CERS4,SLC7A11,BTD,CCN1,IDE,RPL7,RPL10,RPS16,RPS11,GAPDH,RPL7A,RPL19,RPL13A,EEF1A1,RPS3A,RPL3,RPS27A,EEF1G,RPLP0,RPL15,RPL11,RPLP1,RPL27A,RPS13,RPS10,RPL28,RPL18A,RPS15,RPS9,RPS28,RPL18,RPL24,FAU,RPL6,RPL10A,RPL29,RPS7,RPL5,RPS18,RPS14,RPL30,RPL9,RPL13…
GO:BP	organonitrogen compound biosynthetic process	GO:1901566	5.49583e-18	17.26	1789	755	145	21110	SAT1,ST3GAL1,GALNT13,ST8SIA5,PCYT1B,QDPR,SLC1A3,SERINC5,UST,GUCY1A2,ST8SIA1,ST6GAL2,PLCB1,PCSK5,CPEB4,MTTP,SPTLC3,BTG2,MAN1C1,RPS4Y1,PID1,B3GLCT,FUT8,RPS26,PRR16,EGF,FUT10,PLPP1,CRPPA,DPH6,AMPD3,ACSL6,SGMS1,BBOX1,RPS6KA3,ST8SIA4,EIF1AY,CHST9,APOE,PLA2G4C,CERS4,SLC7A11,HS3ST3B1,HHAT,PAPSS1,ATG10,LPCAT2,TET2,INHBA,HS3ST5,CCN1,IL15,CKB,RPL7,RPL10,RPS16,RPS11,GAPDH,RPL7A,RPL19,RPL13A,EEF1A1,RPS3A,RPL…
GO:BP	system development	GO:0048731	1.48331e-15	14.8288	3987	618	208	21110	FLT1,NAV2,NFIB,CADM1,SAT1,LRRC4C,FAP,RARB,SOX5,TNIK,EPHA3,GRID2,CHL1,PROX1,CNTN1,FABP7,LSAMP,WNT5B,COBL,PRKCA,PCYT1B,QDPR,SASH1,SLC1A3,ALDH1A2,CDH23,LAMA1,HECW2,PDGFC,KDM5B,PPP3CC,SIPA1L1,SERINC5,F3,ATP2B2,UST,DNER,NFIA,FGF13,KCNA2,SOX6,SEMA5B,EPAS1,NRG1,CALM1,HES5,THSD7A,PLCE1,SLC6A11,HEY2,RGS7,HDAC9,MEF2C,SNX10,PCDH17,KIT,NEDD4L,NYAP2,NAV3,CDON,DCLK1,MINAR1,ABI3BP,CD44,ID2,MYO6,PLCB1,PCDH15,DOC…
GO:BP	nervous system development	GO:0007399	1.11372e-14	13.9532	2547	618	151	21110	NAV2,NFIB,CADM1,LRRC4C,RARB,SOX5,TNIK,EPHA3,GRID2,CHL1,PROX1,CNTN1,FABP7,LSAMP,WNT5B,COBL,SLC1A3,ALDH1A2,CDH23,LAMA1,HECW2,PDGFC,PPP3CC,SIPA1L1,SERINC5,ATP2B2,UST,DNER,NFIA,FGF13,KCNA2,SOX6,SEMA5B,NRG1,CALM1,HES5,SLC6A11,HEY2,RGS7,HDAC9,MEF2C,PCDH17,KIT,NEDD4L,NYAP2,NAV3,CDON,DCLK1,MINAR1,ID2,MYO6,PLCB1,PCDH15,DOCK10,PCSK2,LHCGR,MPZ,SEMA6A,RBFOX1,SPOCK1,THRB,FOS,CDH4,ROR2,PTPRG,RIPOR2,BTG2,KREMEN…
GO:BP	multicellular organism development	GO:0007275	4.41536e-13	12.355	4658	620	225	21110	FLT1,NAV2,NFIB,CADM1,SAT1,LRRC4C,FAP,RARB,SOX5,TNIK,EPHA3,GRID2,CHL1,PROX1,CNTN1,FABP7,RASGRP1,LSAMP,WNT5B,COBL,PRKCA,PCYT1B,QDPR,SASH1,SLC1A3,ALDH1A2,CDH23,LAMA1,HECW2,PDGFC,KDM5B,PPP3CC,SIPA1L1,SERINC5,F3,ATP2B2,UST,DNER,NFIA,FGF13,KCNA2,SOX6,SEMA5B,EPAS1,NRG1,CALM1,HES5,THSD7A,PLCE1,SLC6A11,HEY2,RGS7,HDAC9,MEF2C,SNX10,ITGB5,PCDH17,KIT,NEDD4L,NYAP2,NAV3,CDON,DCLK1,MINAR1,ABI3BP,CD44,ID2,MYO6,PL…
GO:BP	multicellular organismal process	GO:0032501	5.47082e-12	11.2619	7716	202	129	21110	DGKB,TF,FLT1,GABRG3,NAV2,NFIB,CADM1,SAT1,LRRC4C,FAP,RARB,SOX5,TNIK,EPHA3,GRIK2,GRID2,APBB2,CHL1,PROX1,CNTN1,FABP7,RLBP1,RASGRP1,STAC,LSAMP,ST3GAL1,WNT5B,COBL,NCALD,SCARB1,PRKCA,PCYT1B,QDPR,SASH1,SLC1A3,ALDH1A2,CDH23,LAMA1,HECW2,PDGFC,KDM5B,RGR,PPP3CC,STK39,SIPA1L1,SERINC5,F3,ATP2B2,UST,TRPM3,PTH2R,DNER,NFIA,FGF13,KCNA2,LUM,SOX6,SEMA5B,EPAS1,NRG1,LIMD1,ZC3HAV1,CALM1,HES5,PCDH11Y,THSD7A,RHPN2,PLCE1…
GO:BP	generation of neurons	GO:0048699	1.49001e-11	10.8268	1488	386	73	21110	NFIB,LRRC4C,SOX5,TNIK,EPHA3,GRID2,CHL1,PROX1,CNTN1,WNT5B,COBL,SLC1A3,ALDH1A2,CDH23,LAMA1,HECW2,SIPA1L1,ATP2B2,UST,DNER,NFIA,FGF13,SEMA5B,HES5,HEY2,HDAC9,MEF2C,KIT,NEDD4L,NYAP2,CDON,DCLK1,MINAR1,ID2,MYO6,PCDH15,DOCK10,SEMA6A,SPOCK1,THRB,CDH4,ROR2,PTPRG,RIPOR2,BTG2,KREMEN1,SEZ6,SRRM4,SEMA5A,SFRP1,NLGN1,RP1,PRKN,TIAM1,PTN,OPHN1,NRXN3,NFASC,NEUROD4,CRPPA,IFT88,NRL,VEGFC,STAT3,SATB2,FRY,ACSL6,IL1RAPL1…
GO:BP	neurogenesis	GO:0022008	2.06133e-11	10.6859	1705	386	79	21110	NAV2,NFIB,LRRC4C,RARB,SOX5,TNIK,EPHA3,GRID2,CHL1,PROX1,CNTN1,WNT5B,COBL,SLC1A3,ALDH1A2,CDH23,LAMA1,HECW2,SIPA1L1,ATP2B2,UST,DNER,NFIA,FGF13,SOX6,SEMA5B,HES5,HEY2,HDAC9,MEF2C,KIT,NEDD4L,NYAP2,NAV3,CDON,DCLK1,MINAR1,ID2,MYO6,PCDH15,DOCK10,SEMA6A,SPOCK1,THRB,CDH4,ROR2,PTPRG,RIPOR2,BTG2,KREMEN1,SEZ6,SRRM4,SEMA5A,SFRP1,NLGN1,DUSP10,RP1,SOX13,PRKN,TIAM1,PTN,OPHN1,NRXN3,NFASC,NEUROD4,CRPPA,IFT88,NRL,VEG…
GO:BP	anatomical structure morphogenesis	GO:0009653	3.41549e-11	10.4665	2712	618	148	21110	FLT1,NFIB,SAT1,LRRC4C,FAP,RARB,SOX5,TNIK,EPHA3,GRID2,CHL1,PROX1,CNTN1,WNT5B,COBL,PRKCA,SASH1,SLC1A3,ALDH1A2,CDH23,LAMA1,HECW2,PDGFC,KDM5B,SIPA1L1,F3,UST,NFIA,FGF13,KCNA2,SOX6,SEMA5B,EPAS1,NRG1,LIMD1,HES5,THSD7A,HEY2,HDAC9,MEF2C,SNX10,ITGB5,KIT,NEDD4L,NYAP2,CDON,DCLK1,MINAR1,CD44,ID2,MYO6,PCDH15,DOCK10,PCSK5,PDGFRA,SEMA6A,THRB,ARHGEF28,PALMD,CDH4,ROR2,RIPOR2,CCDC88C,SEMA5A,KDM4C,PID1,SFRP1,RHOJ,MY…
GO:BP	neuron differentiation	GO:0030182	3.0008e-10	9.52276	1415	618	93	21110	NFIB,LRRC4C,TNIK,EPHA3,GRID2,CHL1,PROX1,CNTN1,WNT5B,COBL,SLC1A3,ALDH1A2,CDH23,LAMA1,HECW2,SIPA1L1,ATP2B2,UST,NFIA,FGF13,SEMA5B,HES5,HEY2,HDAC9,MEF2C,KIT,NEDD4L,NYAP2,CDON,DCLK1,MINAR1,ID2,MYO6,PCDH15,DOCK10,SEMA6A,SPOCK1,THRB,CDH4,ROR2,PTPRG,RIPOR2,BTG2,KREMEN1,SEZ6,SRRM4,SEMA5A,SFRP1,NLGN1,RP1,PRKN,TIAM1,PTN,OPHN1,NRXN3,NFASC,NEUROD4,CRPPA,IFT88,NRL,STAT3,FRY,IL1RAPL1,NTN4,EPHB1,EPHA7,CTNNA2,BMP…
GO:BP	anatomical structure development	GO:0048856	3.33248e-10	9.47723	5896	620	257	21110	WIF1,TF,FLT1,NAV2,NFIB,CADM1,SAT1,LRRC4C,FAP,RARB,SOX5,TNIK,EPHA3,GRID2,CHL1,PROX1,CNTN1,FABP7,RASGRP1,LSAMP,ST3GAL1,WNT5B,COBL,PRKCA,PCYT1B,QDPR,SASH1,SLC1A3,ALDH1A2,CDH23,LAMA1,HECW2,PDGFC,KDM5B,PPP3CC,SIPA1L1,SERINC5,F3,ATP2B2,UST,DNER,NFIA,FGF13,KCNA2,SOX6,SEMA5B,EPAS1,NRG1,LIMD1,CALM1,HES5,THSD7A,PLCE1,SLC6A11,HEY2,RGS7,HDAC9,MEF2C,SNX10,ITGB5,PCDH17,KIT,NEDD4L,NYAP2,MEI4,NAV3,CDON,DCLK1,MIN…
GO:BP	protein metabolic process	GO:0019538	1.79168e-09	8.74674	5449	755	282	21110	FLT1,CADM1,FAP,TNIK,EPHA3,PROX1,CNTN1,PRSS35,RASGRP1,ST3GAL1,GALNT13,ST8SIA5,PRKCA,SASH1,LAMA1,HECW2,PDGFC,KDM5B,PPP3CC,STK39,F3,UST,TRIM2,KLHL8,RHBDL3,DNER,ST8SIA1,EPAS1,NRG1,CALM1,HES5,MAPK4,CPA6,PLCE1,DUSP16,HDAC9,MEF2C,KIT,NEDD4L,ST6GAL2,CDON,DCLK1,MINAR1,CD44,PLCB1,UBE2D2,PCSK2,PCSK5,NCOA7,UTY,EGR1,CPEB4,PDGFRA,GPD1L,MTTP,P3H2,SPOCK1,USP9Y,NOS1AP,ROR2,PTPRG,MAP3K1,BTG2,PCSK6,MAN1C1,SETBP1,CC…
GO:BP	cell communication	GO:0007154	6.10905e-09	8.21403	6604	359	175	21110	DGKB,WIF1,TF,FLT1,GABRG3,CADM1,DST,LRRC4C,RARB,VIPR2,TNIK,EPHA3,GRIK2,GRID2,SRGAP1,APBB2,CHL1,PROX1,CNTN1,RASGRP1,STAC,WNT5B,ARHGEF3,NCALD,SCARB1,PRKCA,SASH1,SLC1A3,ALDH1A2,LAMA1,PDGFC,KDM5B,RGR,PPP3CC,STK39,SIPA1L1,F3,GUCY1A2,CGNL1,PTH2R,DNER,NFIA,FGF13,KCNA2,SEMA5B,EPAS1,NRG1,RASGEF1B,LIMD1,ZC3HAV1,CALM1,HES5,PCDH11Y,MAPK4,RHPN2,PLCE1,SLC15A3,SLC6A1,HEY2,DUSP16,RGS7,MEF2C,ITGB5,NR3C2,PCDH17,KIT…
GO:BP	regulation of signaling	GO:0023051	6.24544e-09	8.20444	3413	881	221	21110	DGKB,WIF1,FLT1,CADM1,LRRC4C,TNIK,GRIK2,GRID2,PROX1,RASGRP1,WNT5B,ARHGEF3,PRKCA,SASH1,SLC1A3,LAMA1,PDGFC,KDM5B,PPP3CC,STK39,SIPA1L1,F3,GUCY1A2,CGNL1,NRG1,LIMD1,ZC3HAV1,CALM1,HES5,PCDH11Y,PLCE1,SLC15A3,SLC6A1,HEY2,DUSP16,RGS7,MEF2C,NR3C2,PCDH17,KIT,CDON,MINAR1,CD44,PLCB1,SV2B,GNG7,EGR1,LHCGR,PDGFRA,GPD1L,RGS16,SEMA6A,THRB,ARHGEF28,ARHGAP42,NOS1AP,ROR2,SLC15A2,RIPOR2,NPVF,PCSK6,KREMEN1,SEZ6,CCDC88C,…
GO:BP	sensory organ development	GO:0007423	6.37224e-09	8.19571	601	738	58	21110	FLT1,NFIB,RARB,PROX1,WNT5B,ALDH1A2,CDH23,LAMA1,KDM5B,ATP2B2,NFIA,HES5,HEY2,KIT,CDON,DCLK1,MYO6,PCDH15,PDGFRA,LIN7A,THRB,RIPOR2,RHOJ,CHRDL1,RP1,NEUROD4,PLAAT3,IFT88,NRL,STAT3,BFSP1,EPHB1,BMP2,VSTM4,MITF,CRYAB,ROM1,GNAT1,PTPN11,IMPG2,NR2E3,SLC7A11,PRPH2,INHBA,BMPER,HES1,ZEB1,ASCL1,NHS,SMOC1,NRP1,NES,PFDN5,RPL38,BCL11B,FGF10,C12ORF57,GATA3
GO:BP	camera-type eye development	GO:0043010	8.20608e-09	8.08586	351	738	42	21110	FLT1,NFIB,PROX1,WNT5B,ALDH1A2,LAMA1,KDM5B,ATP2B2,NFIA,HES5,CDON,DCLK1,PDGFRA,THRB,RHOJ,RP1,NEUROD4,PLAAT3,NRL,STAT3,BFSP1,EPHB1,VSTM4,MITF,CRYAB,ROM1,GNAT1,IMPG2,NR2E3,SLC7A11,PRPH2,INHBA,HES1,ZEB1,NHS,NRP1,NES,PFDN5,BCL11B,FGF10,C12ORF57,GATA3
GO:BP	regulation of cell communication	GO:0010646	8.36903e-09	8.07732	3423	881	221	21110	DGKB,WIF1,FLT1,CADM1,LRRC4C,TNIK,GRIK2,GRID2,PROX1,RASGRP1,WNT5B,ARHGEF3,PRKCA,SASH1,SLC1A3,LAMA1,PDGFC,KDM5B,PPP3CC,STK39,SIPA1L1,F3,GUCY1A2,CGNL1,NRG1,LIMD1,ZC3HAV1,CALM1,HES5,PCDH11Y,PLCE1,SLC15A3,SLC6A1,HEY2,DUSP16,RGS7,MEF2C,NR3C2,PCDH17,KIT,CDON,MINAR1,CD44,PLCB1,SV2B,GNG7,EGR1,LHCGR,PDGFRA,GPD1L,RGS16,SEMA6A,THRB,ARHGEF28,ARHGAP42,NOS1AP,ROR2,SLC15A2,RIPOR2,NPVF,PCSK6,KREMEN1,SEZ6,CCDC88C,…
GO:BP	organonitrogen compound metabolic process	GO:1901564	9.81782e-09	8.00798	6441	755	318	21110	FLT1,CADM1,SAT1,FAP,TNIK,EPHA3,PROX1,CNTN1,PRSS35,RASGRP1,ST3GAL1,GALNT13,ST8SIA5,SCARB1,PRKCA,PCYT1B,QDPR,SASH1,SLC1A3,LAMA1,HECW2,PDGFC,KDM5B,PPP3CC,STK39,SERINC5,F3,UST,GUCY1A2,TRIM2,KLHL8,RHBDL3,DNER,ST8SIA1,EPAS1,NRG1,CALM1,HES5,MAPK4,CPA6,PLCE1,DUSP16,HDAC9,MEF2C,KIT,NEDD4L,ST6GAL2,CDON,DCLK1,MINAR1,CD44,PLCB1,UBE2D2,PCSK2,PCSK5,NCOA7,UTY,EGR1,CPEB4,PDGFRA,GPD1L,MTTP,SPTLC3,P3H2,SPOCK1,CRYM…
GO:BP	sensory system development	GO:0048880	1.05398e-08	7.97717	414	738	46	21110	FLT1,NFIB,RARB,PROX1,WNT5B,ALDH1A2,LAMA1,KDM5B,ATP2B2,NFIA,HES5,CDON,DCLK1,PDGFRA,THRB,RHOJ,CHRDL1,RP1,NEUROD4,PLAAT3,NRL,STAT3,BFSP1,EPHB1,VSTM4,MITF,CRYAB,ROM1,GNAT1,IMPG2,NR2E3,SLC7A11,PRPH2,INHBA,HES1,ZEB1,NHS,SMOC1,NRP1,NES,PFDN5,BCL11B,FGF10,C12ORF57,SEMA3A,GATA3
GO:BP	neuron development	GO:0048666	1.58764e-08	7.79925	1144	618	77	21110	NFIB,LRRC4C,TNIK,EPHA3,GRID2,CHL1,CNTN1,COBL,SLC1A3,CDH23,LAMA1,HECW2,SIPA1L1,UST,FGF13,SEMA5B,HES5,MEF2C,KIT,NEDD4L,NYAP2,DCLK1,MINAR1,PCDH15,DOCK10,SEMA6A,SPOCK1,THRB,CDH4,ROR2,PTPRG,RIPOR2,BTG2,KREMEN1,SEZ6,SRRM4,SEMA5A,SFRP1,NLGN1,RP1,PRKN,TIAM1,PTN,OPHN1,NRXN3,NFASC,NEUROD4,CRPPA,IFT88,NRL,FRY,IL1RAPL1,NTN4,EPHB1,EPHA7,CTNNA2,ROM1,DCC,GNAT1,PRMT3,APOE,EFHC2,TRIM67,PTPN11,NR2E3,ITSN2,PRPH2,OT…
GO:BP	eye development	GO:0001654	1.66283e-08	7.77915	404	738	45	21110	FLT1,NFIB,RARB,PROX1,WNT5B,ALDH1A2,LAMA1,KDM5B,ATP2B2,NFIA,HES5,CDON,DCLK1,PDGFRA,THRB,RHOJ,CHRDL1,RP1,NEUROD4,PLAAT3,NRL,STAT3,BFSP1,EPHB1,VSTM4,MITF,CRYAB,ROM1,GNAT1,IMPG2,NR2E3,SLC7A11,PRPH2,INHBA,HES1,ZEB1,NHS,SMOC1,NRP1,NES,PFDN5,BCL11B,FGF10,C12ORF57,GATA3
GO:BP	signaling	GO:0023052	2.0695e-08	7.68413	6493	262	133	21110	DGKB,WIF1,TF,FLT1,GABRG3,CADM1,DST,LRRC4C,RARB,VIPR2,TNIK,EPHA3,GRIK2,GRID2,SRGAP1,APBB2,CHL1,PROX1,CNTN1,RASGRP1,STAC,WNT5B,ARHGEF3,NCALD,SCARB1,PRKCA,SASH1,SLC1A3,ALDH1A2,LAMA1,PDGFC,KDM5B,RGR,PPP3CC,STK39,SIPA1L1,F3,GUCY1A2,CGNL1,PTH2R,DNER,NFIA,FGF13,KCNA2,SEMA5B,EPAS1,NRG1,RASGEF1B,LIMD1,ZC3HAV1,CALM1,HES5,PCDH11Y,MAPK4,RHPN2,PLCE1,SLC15A3,SLC6A1,HEY2,DUSP16,RGS7,MEF2C,ITGB5,NR3C2,PCDH17,KIT…
GO:BP	visual system development	GO:0150063	2.32971e-08	7.6327	408	738	45	21110	FLT1,NFIB,RARB,PROX1,WNT5B,ALDH1A2,LAMA1,KDM5B,ATP2B2,NFIA,HES5,CDON,DCLK1,PDGFRA,THRB,RHOJ,CHRDL1,RP1,NEUROD4,PLAAT3,NRL,STAT3,BFSP1,EPHB1,VSTM4,MITF,CRYAB,ROM1,GNAT1,IMPG2,NR2E3,SLC7A11,PRPH2,INHBA,HES1,ZEB1,NHS,SMOC1,NRP1,NES,PFDN5,BCL11B,FGF10,C12ORF57,GATA3
GO:BP	animal organ development	GO:0048513	2.5097e-08	7.60038	3128	620	155	21110	FLT1,NFIB,CADM1,RARB,SOX5,EPHA3,GRID2,PROX1,CNTN1,WNT5B,COBL,PCYT1B,QDPR,ALDH1A2,CDH23,LAMA1,PDGFC,KDM5B,PPP3CC,ATP2B2,DNER,NFIA,FGF13,KCNA2,SOX6,SEMA5B,EPAS1,NRG1,CALM1,HES5,PLCE1,SLC6A11,HEY2,RGS7,HDAC9,MEF2C,SNX10,KIT,CDON,DCLK1,KAZN,ABI3BP,CD44,ID2,MYO6,PLCB1,PCDH15,PCSK5,UTY,EGR1,LHCGR,PDGFRA,SEMA6A,RBFOX1,LIN7A,THRB,FOS,ROR2,PTPRG,RIPOR2,BTG2,SEZ6,SEMA5A,SFRP1,RHOJ,MYO1E,CHRDL1,FREM1,RP1,AR…
GO:BP	cell development	GO:0048468	4.80156e-08	7.31862	2763	298	82	21110	TF,FLT1,NFIB,LRRC4C,RARB,TNIK,EPHA3,GRID2,CHL1,PROX1,CNTN1,RASGRP1,ST3GAL1,WNT5B,COBL,PRKCA,SLC1A3,ALDH1A2,CDH23,LAMA1,HECW2,SIPA1L1,UST,DNER,FGF13,SEMA5B,EPAS1,NRG1,LIMD1,HES5,HEY2,HDAC9,MEF2C,SNX10,KIT,NEDD4L,NYAP2,MEI4,CDON,DCLK1,MINAR1,ID2,PLCB1,PCDH15,FSIP2,DOCK10,EGR1,PDGFRA,SEMA6A,SPOCK1,THRB,FOS,CDH4,ROR2,PTPRG,RIPOR2,BTG2,KREMEN1,SEZ6,SRRM4,CCDC88C,SEMA5A,OSBP2,SFRP1,MYO1E,NLGN1,NFATC2,D…
GO:BP	developmental process	GO:0032502	7.8408e-08	7.10564	6489	620	267	21110	WIF1,TF,FLT1,NAV2,NFIB,CADM1,SAT1,LRRC4C,FAP,RARB,SOX5,TNIK,EPHA3,GRID2,CHL1,PROX1,CNTN1,FABP7,RASGRP1,LSAMP,ST3GAL1,WNT5B,COBL,PRKCA,PCYT1B,QDPR,SASH1,SLC1A3,ALDH1A2,CDH23,LAMA1,HECW2,PDGFC,KDM5B,PPP3CC,SIPA1L1,SERINC5,F3,ATP2B2,UST,DNER,NFIA,FGF13,KCNA2,SOX6,SEMA5B,EPAS1,NRG1,LIMD1,CALM1,HES5,PCDH11Y,THSD7A,PLCE1,SLC6A11,HEY2,RGS7,HDAC9,MEF2C,SNX10,ITGB5,PCDH17,KIT,NEDD4L,NYAP2,FSTL5,MEI4,NAV3,…
GO:BP	system process	GO:0003008	9.60403e-08	7.01755	2283	342	79	21110	GABRG3,NAV2,GRIK2,GRID2,APBB2,CHL1,RLBP1,STAC,NCALD,SCARB1,PRKCA,SLC1A3,CDH23,KDM5B,RGR,STK39,ATP2B2,TRPM3,FGF13,KCNA2,LUM,SEMA5B,EPAS1,CALM1,RHPN2,PLCE1,SLC6A1,HEY2,MEF2C,SNX10,KIT,NEDD4L,MYO5B,ID2,MYO6,PLCB1,PCDH15,ANKFN1,PCSK5,LHCGR,GPD1L,RGS16,RBFOX1,CRYM,THRB,FOS,RRH,RCVRN,ARHGAP42,NOS1AP,SLC15A2,RIPOR2,BTG2,NPVF,SEZ6,SRRM4,SCN1A,MYO1E,NLGN1,CRY1,PDC,NLGN4Y,RP1,GRIP2,PRKN,PTN,ATXN1,NRXN3,PDE…
GO:BP	cellular developmental process	GO:0048869	1.1609e-07	6.93521	4344	618	195	21110	WIF1,TF,FLT1,NAV2,NFIB,CADM1,LRRC4C,RARB,SOX5,TNIK,EPHA3,GRID2,CHL1,PROX1,CNTN1,RASGRP1,ST3GAL1,WNT5B,COBL,PRKCA,SLC1A3,ALDH1A2,CDH23,LAMA1,HECW2,KDM5B,SIPA1L1,ATP2B2,UST,DNER,NFIA,FGF13,SOX6,SEMA5B,EPAS1,NRG1,LIMD1,HES5,THSD7A,HEY2,HDAC9,MEF2C,SNX10,ITGB5,KIT,NEDD4L,NYAP2,FSTL5,MEI4,NAV3,CDON,DCLK1,MINAR1,KAZN,ABI3BP,CD44,ID2,MYO6,PLCB1,PCDH15,FSIP2,DOCK10,EGR1,PDGFRA,SEMA6A,RBFOX1,SPOCK1,THRB,F…
GO:BP	cell morphogenesis	GO:0000902	2.09169e-07	6.6795	978	295	42	21110	NFIB,LRRC4C,TNIK,EPHA3,CHL1,PROX1,CNTN1,COBL,SLC1A3,CDH23,LAMA1,HECW2,SIPA1L1,UST,NFIA,FGF13,SEMA5B,LIMD1,MEF2C,KIT,NEDD4L,NYAP2,DCLK1,CD44,PCDH15,DOCK10,SEMA6A,ARHGEF28,PALMD,CDH4,RIPOR2,CCDC88C,SEMA5A,RHOJ,NLGN1,PRKN,TIAM1,PTN,OPHN1,NRXN3,MAEL,NFASC
GO:BP	neuron projection development	GO:0031175	3.04765e-07	6.51603	990	295	42	21110	NFIB,LRRC4C,TNIK,EPHA3,GRID2,CHL1,CNTN1,COBL,CDH23,LAMA1,HECW2,SIPA1L1,UST,FGF13,SEMA5B,HES5,MEF2C,KIT,NEDD4L,NYAP2,DCLK1,MINAR1,PCDH15,DOCK10,SEMA6A,SPOCK1,CDH4,ROR2,PTPRG,RIPOR2,BTG2,KREMEN1,SEZ6,SEMA5A,SFRP1,NLGN1,PRKN,TIAM1,PTN,OPHN1,NRXN3,NFASC
GO:BP	cell morphogenesis involved in neuron differentiation	GO:0048667	6.22929e-07	6.20556	590	385	36	21110	NFIB,LRRC4C,TNIK,EPHA3,CHL1,CNTN1,COBL,SLC1A3,CDH23,LAMA1,HECW2,SIPA1L1,UST,FGF13,SEMA5B,MEF2C,KIT,NEDD4L,DCLK1,PCDH15,DOCK10,SEMA6A,CDH4,RIPOR2,SEMA5A,NLGN1,TIAM1,PTN,OPHN1,NRXN3,NFASC,CRPPA,IL1RAPL1,EPHB1,EPHA7,CTNNA2
GO:BP	cell morphogenesis involved in differentiation	GO:0000904	6.33751e-07	6.19808	662	295	33	21110	NFIB,LRRC4C,TNIK,EPHA3,CHL1,PROX1,CNTN1,COBL,SLC1A3,CDH23,LAMA1,HECW2,SIPA1L1,UST,FGF13,SEMA5B,MEF2C,KIT,NEDD4L,DCLK1,PCDH15,DOCK10,SEMA6A,CDH4,RIPOR2,CCDC88C,SEMA5A,NLGN1,TIAM1,PTN,OPHN1,NRXN3,NFASC
GO:BP	regulation of developmental process	GO:0050793	6.99279e-07	6.15535	2482	618	126	21110	WIF1,FLT1,NFIB,LRRC4C,RARB,SOX5,TNIK,EPHA3,GRID2,PROX1,RASGRP1,WNT5B,COBL,PRKCA,SASH1,LAMA1,HECW2,KDM5B,SIPA1L1,F3,UST,FGF13,SOX6,SEMA5B,NRG1,LIMD1,HES5,HEY2,HDAC9,MEF2C,KIT,NEDD4L,CDON,MINAR1,ABI3BP,CD44,ID2,PLCB1,PDGFRA,SEMA6A,RBFOX1,FOS,PALMD,CDH4,ROR2,RIPOR2,BTG2,KREMEN1,SEZ6,SEMA5A,KDM4C,PID1,SFRP1,RHOJ,NLGN1,NFATC2,DUSP10,SOX13,PRKN,LRRN3,TIAM1,EGF,PTN,PDE3A,ABCG1,HMGA2,MAEL,NEUROD4,PLAAT3,…
GO:BP	intracellular signal transduction	GO:0035556	7.39969e-07	6.13079	2669	891	177	21110	DGKB,TF,FLT1,TNIK,APBB2,PROX1,RASGRP1,ARHGEF3,NCALD,PRKCA,SASH1,PDGFC,PPP3CC,STK39,SIPA1L1,F3,GUCY1A2,CGNL1,FGF13,NRG1,RASGEF1B,LIMD1,ZC3HAV1,CALM1,MAPK4,PLCE1,DUSP16,RGS7,MEF2C,NR3C2,KIT,NYAP2,CDON,DCLK1,MINAR1,CD44,RASD1,MYO6,PLCB1,PAG1,DOCK10,LHCGR,PDGFRA,GPD1L,SEMA6A,FOS,ARHGEF28,ARHGAP42,NOS1AP,CLNK,ROR2,RIPOR2,MAP3K1,SEZ6,CCDC88C,SEMA5A,PPP1R1C,SFRP1,RHOJ,NLGN1,NFATC2,DUSP10,CRY1,RP1,PRKN,T…
GO:BP	cell differentiation	GO:0030154	7.41587e-07	6.12984	4318	618	191	21110	WIF1,TF,FLT1,NAV2,NFIB,CADM1,LRRC4C,RARB,SOX5,TNIK,EPHA3,GRID2,CHL1,PROX1,CNTN1,RASGRP1,ST3GAL1,WNT5B,COBL,PRKCA,SLC1A3,ALDH1A2,CDH23,LAMA1,HECW2,KDM5B,SIPA1L1,ATP2B2,UST,DNER,NFIA,FGF13,SOX6,SEMA5B,EPAS1,NRG1,LIMD1,HES5,THSD7A,HEY2,HDAC9,MEF2C,SNX10,ITGB5,KIT,NEDD4L,NYAP2,FSTL5,MEI4,NAV3,CDON,DCLK1,MINAR1,KAZN,ABI3BP,ID2,MYO6,PLCB1,PCDH15,FSIP2,DOCK10,EGR1,PDGFRA,SEMA6A,RBFOX1,SPOCK1,THRB,FOS,AR…
GO:BP	regulation of biological quality	GO:0065008	1.04786e-06	5.9797	2964	387	100	21110	DGKB,TF,GABRG3,NAV2,FAP,GRIK2,GRID2,NCALD,PRKCA,SLC1A3,ALDH1A2,KDM5B,STK39,SIPA1L1,F3,FGF13,KCNA2,KCNH8,SEMA5B,EPAS1,NRG1,LIMD1,CALM1,PLCE1,SLC6A1,SLC6A11,HEY2,MEF2C,KIT,NEDD4L,MYO5B,ID2,PLCB1,PCSK2,SV2B,PCSK5,EGR1,LHCGR,PDGFRA,GPD1L,SEMA6A,LIN7A,CRYM,THRB,PALMD,ARHGAP42,CDH4,NOS1AP,ROR2,BTG2,NPVF,PCSK6,SEZ6,CCDC88C,SEMA5A,ANO3,PID1,SFRP1,SCN1A,RHOJ,NLGN1,KCNH7,CHRDL1,CRY1,GRIP2,PRKN,PRR16,LRRN3,…
GO:BP	regulation of plasma membrane bounded cell projection organization	GO:0120035	1.24527e-06	5.90474	642	279	31	21110	LRRC4C,TNIK,EPHA3,GRID2,CNTN1,COBL,HECW2,SIPA1L1,UST,FGF13,SEMA5B,PLCE1,KIT,NEDD4L,MINAR1,CD44,SEMA6A,SPOCK1,CDH4,ROR2,PTPRG,RIPOR2,KREMEN1,SEZ6,SEMA5A,SFRP1,NLGN1,RP1,BCAS3,TIAM1,PTN
GO:BP	central nervous system development	GO:0007417	1.32876e-06	5.87655	1092	618	70	21110	NAV2,NFIB,CADM1,RARB,GRID2,PROX1,CNTN1,ALDH1A2,PDGFC,PPP3CC,ATP2B2,DNER,FGF13,KCNA2,SOX6,CALM1,HES5,SLC6A11,RGS7,CDON,DCLK1,ID2,PLCB1,LHCGR,SPOCK1,ROR2,PTPRG,BTG2,SEZ6,SEMA5A,SFRP1,NPAS2,DUSP10,SOX13,PRKN,EGF,PTN,OPHN1,ATXN1,FUT10,NFASC,NEUROD4,STAT3,GRIK1,EPHB1,CTTNBP2,CADM2,EPHA7,CTNNA2,BMP2,RPS6KA3,DCC,SHROOM4,ADAM23,MCPH1,PTPN11,SLC7A11,BTD,INHBA,OTX2,KDM7A,HES1,SLC8A1,ZEB1,NNAT,ASCL1,DAB1,CK…
GO:BP	cell migration	GO:0016477	1.67503e-06	5.77598	1505	873	112	21110	FLT1,FAP,EPHA3,SRGAP1,CHL1,PROX1,FRMD5,WNT5B,SCARB1,PRKCA,SASH1,LAMA1,PDGFC,STK39,F3,DNER,FGF13,SEMA5B,LIMD1,HDAC9,MEF2C,ITGB5,KIT,NAV3,DCLK1,CD44,PLCB1,DOCK10,PDGFRA,SEMA6A,SPOCK1,USP9Y,ROR2,PTPRG,RIPOR2,SEMA5A,SFRP1,RHOJ,NFATC2,DUSP10,FUT8,ARID5B,BCAS3,TIAM1,EGF,PTN,OPHN1,FUT10,NEUROD4,VEGFC,ABCC1,STAT3,SATB2,NR4A1,NTN4,EPHB1,CTNNA2,BMP2,VSTM4,PRR5L,MITF,DCC,MEGF10,MRTFA,SORL1,ATP8A1,ADAMTS12,A…
GO:BP	regulation of neuron projection development	GO:0010975	2.02124e-06	5.69438	449	230	23	21110	LRRC4C,TNIK,EPHA3,GRID2,CNTN1,COBL,HECW2,SIPA1L1,UST,FGF13,SEMA5B,NEDD4L,MINAR1,SEMA6A,SPOCK1,CDH4,ROR2,PTPRG,KREMEN1,SEZ6,SEMA5A,SFRP1,NLGN1
GO:BP	signal transduction	GO:0007165	2.0898e-06	5.6799	6034	262	121	21110	DGKB,WIF1,TF,FLT1,GABRG3,CADM1,DST,RARB,VIPR2,TNIK,EPHA3,GRIK2,GRID2,SRGAP1,APBB2,CHL1,PROX1,CNTN1,RASGRP1,STAC,WNT5B,ARHGEF3,NCALD,SCARB1,PRKCA,SASH1,ALDH1A2,LAMA1,PDGFC,RGR,PPP3CC,STK39,SIPA1L1,F3,GUCY1A2,CGNL1,PTH2R,DNER,NFIA,FGF13,SEMA5B,EPAS1,NRG1,RASGEF1B,LIMD1,ZC3HAV1,CALM1,HES5,PCDH11Y,MAPK4,RHPN2,PLCE1,SLC15A3,HEY2,DUSP16,RGS7,MEF2C,ITGB5,NR3C2,KIT,NYAP2,CDON,DCLK1,MINAR1,CD44,RASD1,MYO6…
GO:BP	regulation of cell projection organization	GO:0031344	2.09676e-06	5.67845	656	279	31	21110	LRRC4C,TNIK,EPHA3,GRID2,CNTN1,COBL,HECW2,SIPA1L1,UST,FGF13,SEMA5B,PLCE1,KIT,NEDD4L,MINAR1,CD44,SEMA6A,SPOCK1,CDH4,ROR2,PTPRG,RIPOR2,KREMEN1,SEZ6,SEMA5A,SFRP1,NLGN1,RP1,BCAS3,TIAM1,PTN
GO:BP	regulation of signal transduction	GO:0009966	2.21183e-06	5.65525	3003	891	192	21110	WIF1,FLT1,CADM1,TNIK,PROX1,RASGRP1,WNT5B,ARHGEF3,PRKCA,SASH1,LAMA1,PDGFC,PPP3CC,STK39,SIPA1L1,F3,GUCY1A2,CGNL1,NRG1,LIMD1,ZC3HAV1,CALM1,HES5,PCDH11Y,PLCE1,SLC15A3,HEY2,DUSP16,RGS7,MEF2C,NR3C2,KIT,CDON,MINAR1,CD44,PLCB1,GNG7,EGR1,LHCGR,PDGFRA,GPD1L,RGS16,SEMA6A,THRB,ARHGEF28,ARHGAP42,NOS1AP,ROR2,SLC15A2,RIPOR2,PCSK6,KREMEN1,SEZ6,CCDC88C,SEMA5A,KDM4C,PID1,SFRP1,NLGN1,DUSP10,CHRDL1,AFAP1,FRMPD1,CRY1…
GO:BP	ribosome assembly	GO:0042255	3.16229e-06	5.5	59	747	15	21110	RPL10,RPLP0,RPL11,RPS15,RPS28,RPL6,RPL5,RPS14,RPS5,RPSA,RPS27,RPS19,RPL38,RPL23A,NOP53
GO:BP	positive regulation of developmental process	GO:0051094	3.50927e-06	5.45478	1310	617	78	21110	WIF1,FLT1,SOX5,GRID2,PROX1,RASGRP1,WNT5B,COBL,PRKCA,SASH1,LAMA1,KDM5B,F3,SOX6,NRG1,HEY2,MEF2C,KIT,NEDD4L,CDON,ABI3BP,ID2,PLCB1,FOS,CDH4,ROR2,RIPOR2,SEMA5A,SFRP1,NLGN1,NFATC2,DUSP10,SOX13,PRKN,LRRN3,TIAM1,EGF,PTN,PDE3A,HMGA2,NEUROD4,DDAH1,VEGFC,STAT3,ATP11A,CAPN3,IL1RAPL1,EPHB1,BMP2,RPS6KA3,MME,SYNDIG1,SORL1,ERBB3,APOE,PCP4,NCOA3,ANGPT2,ADAM12,CCDC3,ITSN2,MAP3K5,INHBA,OTX2,CCN1,IL15,BRMS1L,BMPER,M…
GO:BP	detection of external stimulus	GO:0009581	3.66946e-06	5.4354	146	554	20	21110	GRIK2,RGR,TRPM3,SEMA5B,KIT,PCDH15,RRH,RCVRN,ANO3,SCN1A,PDC,RP1,AIPL1,GNGT2,EPHB1,ROM1,SCN9A,GNAT1,NR2E3,PRPH2
GO:BP	ribosomal small subunit biogenesis	GO:0042274	5.22005e-06	5.28233	80	748	17	21110	RPS16,RPS15,RPS9,RPS28,RPS7,RPS14,RPS5,RPSA,RPS24,RPS25,RPS6,RPS27,RPS19,RPS8,RPL38,RPS17,RPS21
GO:BP	detection of abiotic stimulus	GO:0009582	5.27281e-06	5.27796	149	554	20	21110	GRIK2,RGR,TRPM3,SEMA5B,KIT,PCDH15,RRH,RCVRN,ANO3,SCN1A,PDC,RP1,AIPL1,GNGT2,EPHB1,ROM1,SCN9A,GNAT1,NR2E3,PRPH2
GO:BP	retina development in camera-type eye	GO:0060041	6.20475e-06	5.20728	165	613	22	21110	NFIB,PROX1,LAMA1,ATP2B2,NFIA,CDON,DCLK1,PDGFRA,THRB,RHOJ,RP1,NEUROD4,NRL,STAT3,VSTM4,ROM1,GNAT1,IMPG2,NR2E3,PRPH2,HES1,NRP1
GO:BP	cell part morphogenesis	GO:0032990	6.34898e-06	5.1973	691	867	63	21110	NFIB,LRRC4C,TNIK,EPHA3,CHL1,CNTN1,COBL,LAMA1,HECW2,SIPA1L1,UST,FGF13,SEMA5B,KIT,NEDD4L,NYAP2,DCLK1,CD44,DOCK10,SEMA6A,CDH4,SEMA5A,PID1,NLGN1,PRKN,TIAM1,PTN,OPHN1,NRXN3,NFASC,CRPPA,MYH14,IL1RAPL1,EPHB1,EPHA7,CTNNA2,DCC,PRMT3,APOE,PTPN11,ITSN2,OTX2,TAOK3,KIF13B,MTM1,DAB1,NRP1,UNC5D,SEMA6D,ACTB,NES,BCL11B,C12ORF57,SEMA3A,GATA3,BCL2L1,LRTM1,SPAST,NTN1,TNR,PAK3,VAX2,PRKG1
GO:BP	enzyme-linked receptor protein signaling pathway	GO:0007167	1.00301e-05	4.99869	990	613	63	21110	TF,FLT1,CADM1,EPHA3,PDGFC,SIPA1L1,F3,NFIA,NRG1,HES5,PLCE1,ITGB5,KIT,PLCB1,GNG7,EGR1,PDGFRA,SEMA6A,FOS,ARHGEF28,USP9Y,CLNK,ROR2,PTPRG,PCSK6,PID1,SFRP1,MYO1E,CHRDL1,FUT8,ARID5B,KIF16B,TIAM1,EGF,PTN,VEGFC,STAT3,PDE6H,EPHB1,EPHA7,BMP2,SORL1,ADAMTS12,ERBB3,GAREM1,MTSS1,PTPN11,ANGPT2,CBL,NR4A3,SMAD6,INHBA,OTX2,CCN1,BRMS1L,PIK3R3,IDE,BMPER,HES1,SORBS1,ZEB1,FOXO1,NRP1
GO:BP	behavior	GO:0007610	1.01128e-05	4.99513	649	284	30	21110	NAV2,GRIK2,CHL1,CNTN1,SLC1A3,CDH23,FGF13,KCNA2,SLC6A1,MEF2C,PCDH17,KIT,ID2,PLCB1,PCDH15,ANKFN1,GNG7,EGR1,THRB,FOS,BTG2,SEZ6,SCN1A,NPAS2,NLGN1,NLGN4Y,PRKN,PTN,ATXN1,NRXN3
GO:BP	ribosomal large subunit biogenesis	GO:0042273	1.42696e-05	4.84559	75	747	16	21110	HEATR3,RPL7,RPL10,RPL7A,RPLP0,RPL11,RPL6,RPL10A,RPL5,RPL14,RPL35,RPL26,RPL35A,RPL38,RPL23A,NOP53
GO:BP	cellular component morphogenesis	GO:0032989	2.0957e-05	4.67867	796	867	68	21110	NFIB,LRRC4C,TNIK,EPHA3,CHL1,PROX1,CNTN1,COBL,LAMA1,HECW2,SIPA1L1,UST,FGF13,SEMA5B,KIT,NEDD4L,NYAP2,DCLK1,CD44,DOCK10,PDGFRA,SEMA6A,CDH4,SEMA5A,PID1,NLGN1,PRKN,TIAM1,PTN,OPHN1,NRXN3,NFASC,CRPPA,MYH14,CAPN3,IL1RAPL1,EPHB1,EPHA7,CTNNA2,DCC,PRMT3,APOE,PTPN11,TMOD2,ITSN2,OTX2,TAOK3,KIF13B,MTM1,DAB1,NRP1,UNC5D,SEMA6D,ACTB,ACTG1,NES,BCL11B,C12ORF57,SEMA3A,GATA3,BCL2L1,LRTM1,SPAST,NTN1,TNR,PAK3,VAX2,PRKG1
GO:BP	regulation of intracellular signal transduction	GO:1902531	2.12826e-05	4.67197	1728	881	121	21110	FLT1,TNIK,PROX1,RASGRP1,ARHGEF3,PRKCA,SASH1,PDGFC,PPP3CC,STK39,SIPA1L1,F3,GUCY1A2,CGNL1,NRG1,LIMD1,ZC3HAV1,CALM1,PLCE1,DUSP16,MEF2C,NR3C2,KIT,CDON,MINAR1,CD44,PLCB1,LHCGR,PDGFRA,GPD1L,SEMA6A,ARHGEF28,ARHGAP42,NOS1AP,ROR2,RIPOR2,SEZ6,SEMA5A,SFRP1,NLGN1,DUSP10,CRY1,PRKN,TIAM1,EGF,OPHN1,ARHGAP31,PDE3A,SESN1,WNK2,ITSN1,ARHGAP28,PDE6H,KSR1,CAPN3,EPHB1,EPHA7,SGMS1,BMP2,PRR5L,GPR137C,LIMS1,PLA2R1,CYTH1,…
GO:BP	ventricular cardiac muscle cell differentiation	GO:0055012	2.4022e-05	4.61939	15	111	5	21110	RARB,PROX1,NRG1,HEY2,MEF2C
GO:BP	regulation of multicellular organismal process	GO:0051239	4.38097e-05	4.35843	3021	233	66	21110	TF,FLT1,NFIB,CADM1,FAP,RARB,SOX5,GRID2,PROX1,RASGRP1,SCARB1,PRKCA,SASH1,LAMA1,PDGFC,KDM5B,STK39,F3,ATP2B2,PTH2R,FGF13,KCNA2,LUM,SOX6,SEMA5B,EPAS1,NRG1,ZC3HAV1,CALM1,HES5,PLCE1,HEY2,HDAC9,MEF2C,KIT,NAV3,CDON,MINAR1,ABI3BP,ID2,PLCB1,PAG1,EGR1,PDGFRA,GPD1L,SEMA6A,THRB,FOS,ARHGAP42,CDH4,NOS1AP,CLNK,ROR2,PTPRG,RIPOR2,BTG2,NPVF,KREMEN1,SEMA5A,CARD18,SFRP1,RHOJ,NPAS2,NLGN1,NFATC2,DUSP10
GO:BP	muscle structure development	GO:0061061	4.50662e-05	4.34615	664	842	58	21110	RARB,PROX1,WNT5B,LAMA1,DNER,SOX6,EPAS1,NRG1,HEY2,HDAC9,MEF2C,KIT,CDON,ID2,PLCB1,EGR1,PDGFRA,RBFOX1,FOS,RIPOR2,BTG2,NFATC2,ARID5B,SVIL,MYH14,ATP11A,NR4A1,ALPK2,CAPN3,EPHB1,TLL2,BMP2,CRYAB,MEGF10,KCNH1,MRTFA,ERBB3,TMOD2,ADAM12,MAP3K5,MTM1,HES1,SLC8A1,ZEB1,NACA,ACTB,ACTG1,DOCK5,FGF10,ADAMTS15,YBX1,SORT1,TRIP4,PPARA,NKD1,LARGE1,PLPP7,CTH
GO:BP	visual perception	GO:0007601	4.92027e-05	4.30801	221	554	23	21110	RLBP1,CDH23,RGR,LUM,SEMA5B,EPAS1,PCDH15,RGS16,RRH,RCVRN,PDC,RP1,AIPL1,NRL,PDE6H,ROM1,GNAT1,RAX2,CRX,IMPG2,NR2E3,RBP3,PRPH2
GO:BP	ribosome biogenesis	GO:0042254	5.38425e-05	4.26887	312	748	33	21110	HEATR3,RPL7,RPL10,RPS16,RPL7A,RPLP0,RPL11,RPS15,RPS9,RPS28,RPL6,RPL10A,RPS7,RPL5,RPS14,RPS5,RPSA,RPS24,RPS25,RPS6,RPS27,RPS19,RPL14,RPL35,RPS8,RPL26,RPL27,RPL35A,RPL38,RPL23A,RPS17,NOP53,RPS21
GO:BP	tube development	GO:0035295	5.68109e-05	4.24557	1082	166	28	21110	FLT1,NFIB,SAT1,FAP,RARB,PROX1,COBL,PRKCA,SASH1,ALDH1A2,LAMA1,PDGFC,KDM5B,F3,NFIA,EPAS1,HES5,THSD7A,HEY2,HDAC9,MEF2C,KIT,MINAR1,ID2,PCSK5,LHCGR,PDGFRA,SEMA6A
GO:BP	epithelial cell proliferation	GO:0050673	6.16845e-05	4.20982	449	771	42	21110	FLT1,NFIB,FAP,PROX1,FABP7,SCARB1,PRKCA,ALDH1A2,KDM5B,F3,ST8SIA1,HES5,MEF2C,KIT,ID2,SEMA5A,SFRP1,DUSP10,EGF,PTN,VEGFC,STAT3,NR4A1,BMP2,VSTM4,APOE,CNMD,MTSS1,NR4A3,BMPER,HES1,ZEB1,NRP1,HMGB1,CCND1,BCL11B,FGF10,GATA3,PRKX,NME2,BCL2L1,SCG2
GO:BP	sensory perception of light stimulus	GO:0050953	6.33926e-05	4.19796	224	554	23	21110	RLBP1,CDH23,RGR,LUM,SEMA5B,EPAS1,PCDH15,RGS16,RRH,RCVRN,PDC,RP1,AIPL1,NRL,PDE6H,ROM1,GNAT1,RAX2,CRX,IMPG2,NR2E3,RBP3,PRPH2
GO:BP	cell motility	GO:0048870	7.11189e-05	4.14801	1705	873	117	21110	TF,FLT1,DST,FAP,EPHA3,SRGAP1,CHL1,PROX1,FRMD5,WNT5B,SCARB1,PRKCA,SASH1,LAMA1,PDGFC,STK39,F3,DNER,FGF13,SEMA5B,LIMD1,HDAC9,MEF2C,ITGB5,KIT,NAV3,DCLK1,CD44,PLCB1,FSIP2,DOCK10,PDGFRA,SEMA6A,SPOCK1,USP9Y,ROR2,PTPRG,RIPOR2,SEMA5A,SFRP1,RHOJ,NFATC2,DUSP10,FUT8,ARID5B,BCAS3,TIAM1,EGF,PTN,OPHN1,FUT10,NEUROD4,VEGFC,ABCC1,STAT3,SATB2,NR4A1,NTN4,EPHB1,CTNNA2,BMP2,VSTM4,PRR5L,MITF,DCC,MEGF10,MRTFA,SORL1,ATP8…
GO:BP	cell projection morphogenesis	GO:0048858	7.5715e-05	4.12082	671	867	59	21110	NFIB,LRRC4C,TNIK,EPHA3,CHL1,CNTN1,COBL,LAMA1,HECW2,SIPA1L1,UST,FGF13,SEMA5B,KIT,NEDD4L,NYAP2,DCLK1,CD44,DOCK10,SEMA6A,CDH4,SEMA5A,NLGN1,PRKN,TIAM1,PTN,OPHN1,NRXN3,NFASC,CRPPA,IL1RAPL1,EPHB1,EPHA7,CTNNA2,DCC,PRMT3,APOE,PTPN11,ITSN2,OTX2,TAOK3,KIF13B,DAB1,NRP1,UNC5D,SEMA6D,ACTB,NES,BCL11B,C12ORF57,SEMA3A,GATA3,LRTM1,SPAST,NTN1,TNR,PAK3,VAX2,PRKG1
GO:BP	brain development	GO:0007420	8.03036e-05	4.09526	798	730	59	21110	NFIB,CADM1,RARB,GRID2,PROX1,CNTN1,ALDH1A2,PPP3CC,ATP2B2,FGF13,KCNA2,SOX6,CALM1,HES5,SLC6A11,RGS7,CDON,DCLK1,ID2,PLCB1,PTPRG,BTG2,SEZ6,SEMA5A,SFRP1,EGF,OPHN1,ATXN1,FUT10,NFASC,EPHB1,CTTNBP2,CADM2,EPHA7,CTNNA2,BMP2,SHROOM4,MCPH1,PTPN11,SLC7A11,INHBA,OTX2,KDM7A,HES1,SLC8A1,ZEB1,NNAT,ASCL1,DAB1,CKB,NRP1,SEMA6D,ACTB,NES,BCL11B,FGF10,C12ORF57,PCDH19,SEMA3A
GO:BP	cell fate commitment	GO:0045165	8.27838e-05	4.08205	284	135	13	21110	NFIB,SOX5,PROX1,WNT5B,NFIA,FGF13,SOX6,EPAS1,HES5,HEY2,MEF2C,CDON,ID2
GO:BP	regulation of cell migration	GO:0030334	0.000103856	3.98357	927	873	74	21110	FLT1,SRGAP1,PROX1,FRMD5,WNT5B,SCARB1,PRKCA,SASH1,LAMA1,PDGFC,STK39,F3,SEMA5B,HDAC9,MEF2C,KIT,NAV3,PLCB1,DOCK10,PDGFRA,SEMA6A,ROR2,PTPRG,RIPOR2,SEMA5A,SFRP1,RHOJ,DUSP10,BCAS3,TIAM1,EGF,PTN,VEGFC,STAT3,CTNNA2,BMP2,PRR5L,MITF,SORL1,ATP8A1,APOE,ANGPT2,IL1R1,NR4A3,CCN1,BRMS1L,PIK3R3,BMPER,SLC8A1,NRP1,UNC5D,HMGB1,SEMA6D,RACK1,MIF,TMSB4X,ACTG1,DOCK5,FGF10,SEMA3A,LRCH1,GATA3,PRKX,GCNT2,PADI2,NKD1,NTN1,TN…
GO:BP	cell surface receptor signaling pathway	GO:0007166	0.000105318	3.9775	2890	279	72	21110	WIF1,TF,FLT1,GABRG3,CADM1,DST,VIPR2,TNIK,EPHA3,GRIK2,GRID2,CNTN1,WNT5B,SCARB1,PRKCA,SASH1,LAMA1,PDGFC,STK39,SIPA1L1,F3,PTH2R,DNER,NFIA,SEMA5B,NRG1,LIMD1,HES5,PCDH11Y,PLCE1,HEY2,MEF2C,ITGB5,KIT,CDON,CD44,PLCB1,MAML2,GNG7,EGR1,CPEB4,PDGFRA,SEMA6A,FOS,ARHGEF28,USP9Y,CLNK,ROR2,PTPRG,MAP3K1,PCSK6,KREMEN1,SEZ6,CCDC88C,SEMA5A,PID1,SFRP1,MYO1E,NLGN1,NFATC2,CHRDL1,FUT8,GRIP2,ARID5B,SOX13,KIF16B,ADGRG7,PRK…
GO:BP	ribosomal small subunit assembly	GO:0000028	0.000112403	3.94922	18	707	8	21110	RPS15,RPS28,RPS14,RPS5,RPSA,RPS27,RPS19,RPL38
GO:BP	head development	GO:0060322	0.000125098	3.90275	848	730	61	21110	NFIB,CADM1,RARB,GRID2,PROX1,CNTN1,ALDH1A2,PPP3CC,ATP2B2,FGF13,KCNA2,SOX6,CALM1,HES5,SLC6A11,RGS7,CDON,DCLK1,ID2,PLCB1,PDGFRA,PTPRG,BTG2,SEZ6,SEMA5A,SFRP1,ARID5B,EGF,OPHN1,ATXN1,FUT10,NFASC,EPHB1,CTTNBP2,CADM2,EPHA7,CTNNA2,BMP2,SHROOM4,MCPH1,PTPN11,SLC7A11,INHBA,OTX2,KDM7A,HES1,SLC8A1,ZEB1,NNAT,ASCL1,DAB1,CKB,NRP1,SEMA6D,ACTB,NES,BCL11B,FGF10,C12ORF57,PCDH19,SEMA3A
GO:BP	locomotion	GO:0040011	0.000128718	3.89036	1365	873	98	21110	TF,FLT1,NFIB,EPHA3,SRGAP1,CHL1,PROX1,CNTN1,FRMD5,WNT5B,SCARB1,PRKCA,SASH1,LAMA1,PDGFC,STK39,F3,SEMA5B,NRG1,HDAC9,MEF2C,KIT,NAV3,PLCB1,DOCK10,PDGFRA,SEMA6A,CDH4,ROR2,PTPRG,RIPOR2,SEMA5A,SFRP1,RHOJ,DUSP10,BCAS3,TIAM1,EGF,PTN,OPHN1,NRXN3,NFASC,CRPPA,VEGFC,ABCC1,STAT3,NR4A1,EPHB1,EPHA7,CTNNA2,BMP2,PRR5L,MITF,DCC,SORL1,ATP8A1,APOE,ANGPT2,IL1R1,NR4A3,OTX2,CCN1,BRMS1L,PIK3R3,BMPER,SLC8A1,NRP1,UNC5D,HMGB…
GO:BP	plasma membrane bounded cell projection morphogenesis	GO:0120039	0.000138577	3.85831	666	867	58	21110	NFIB,LRRC4C,TNIK,EPHA3,CHL1,CNTN1,COBL,LAMA1,HECW2,SIPA1L1,UST,FGF13,SEMA5B,KIT,NEDD4L,NYAP2,DCLK1,CD44,DOCK10,SEMA6A,CDH4,SEMA5A,NLGN1,PRKN,TIAM1,PTN,OPHN1,NRXN3,NFASC,CRPPA,IL1RAPL1,EPHB1,EPHA7,CTNNA2,DCC,PRMT3,APOE,PTPN11,ITSN2,OTX2,TAOK3,KIF13B,DAB1,NRP1,UNC5D,SEMA6D,ACTB,BCL11B,C12ORF57,SEMA3A,GATA3,LRTM1,SPAST,NTN1,TNR,PAK3,VAX2,PRKG1
GO:BP	neuron projection morphogenesis	GO:0048812	0.000142681	3.84563	650	867	57	21110	NFIB,LRRC4C,TNIK,EPHA3,CHL1,CNTN1,COBL,LAMA1,HECW2,SIPA1L1,UST,FGF13,SEMA5B,KIT,NEDD4L,NYAP2,DCLK1,DOCK10,SEMA6A,CDH4,SEMA5A,NLGN1,PRKN,TIAM1,PTN,OPHN1,NRXN3,NFASC,CRPPA,IL1RAPL1,EPHB1,EPHA7,CTNNA2,DCC,PRMT3,APOE,PTPN11,ITSN2,OTX2,TAOK3,KIF13B,DAB1,NRP1,UNC5D,SEMA6D,ACTB,BCL11B,C12ORF57,SEMA3A,GATA3,LRTM1,SPAST,NTN1,TNR,PAK3,VAX2,PRKG1
GO:BP	axonogenesis	GO:0007409	0.000163727	3.78588	460	867	45	21110	NFIB,LRRC4C,EPHA3,CHL1,CNTN1,COBL,LAMA1,SIPA1L1,UST,FGF13,SEMA5B,KIT,DCLK1,SEMA6A,CDH4,SEMA5A,TIAM1,OPHN1,NRXN3,NFASC,CRPPA,EPHB1,EPHA7,CTNNA2,DCC,APOE,PTPN11,OTX2,KIF13B,DAB1,NRP1,UNC5D,SEMA6D,ACTB,BCL11B,C12ORF57,SEMA3A,GATA3,LRTM1,SPAST,NTN1,TNR,PAK3,VAX2,PRKG1
GO:BP	trans-synaptic signaling	GO:0099537	0.000166667	3.77815	759	525	45	21110	DGKB,GABRG3,LRRC4C,GRIK2,GRID2,SLC1A3,SIPA1L1,SLC6A1,MEF2C,PCDH17,KIT,PLCB1,SV2B,MPZ,LIN7A,ROR2,SEZ6,NLGN1,CHRDL1,RIMBP2,NLGN4Y,PRKN,PTN,OPHN1,NRXN3,CACNA1B,SNCAIP,SLC1A4,NR4A1,GRIK1,CPLX1,IL1RAPL1,EPHB1,EPHA7,CA2,RPS6KA3,MME,DCC,PXK,APOE,BTBD9,TMOD2,CADPS,SLC7A11,APBA1
GO:BP	negative regulation of ubiquitin protein ligase activity	GO:1904667	0.000168446	3.77354	13	719	7	21110	RPL11,RPS15,RPS7,RPL5,RPS20,RPL23,RPL37
GO:BP	axon development	GO:0061564	0.000185505	3.73164	509	867	48	21110	NFIB,LRRC4C,EPHA3,CHL1,CNTN1,COBL,LAMA1,SIPA1L1,UST,FGF13,SEMA5B,KIT,DCLK1,SEMA6A,CDH4,KREMEN1,SEMA5A,TIAM1,PTN,OPHN1,NRXN3,NFASC,CRPPA,EPHB1,EPHA7,CTNNA2,DCC,APOE,PTPN11,OTX2,KIF13B,DAB1,NRP1,UNC5D,SEMA6D,ACTB,BCL11B,C12ORF57,SEMA3A,GATA3,LRTM1,SPAST,NTN1,TNR,PAK3,VAX2,GRM7,PRKG1
GO:BP	endothelial cell proliferation	GO:0001935	0.000187422	3.72718	159	771	22	21110	FLT1,PROX1,SCARB1,PRKCA,ALDH1A2,F3,MEF2C,SEMA5A,EGF,VEGFC,STAT3,NR4A1,BMP2,VSTM4,APOE,CNMD,BMPER,NRP1,HMGB1,FGF10,PRKX,SCG2
GO:BP	modulation of chemical synaptic transmission	GO:0050804	0.000189445	3.72252	490	525	34	21110	DGKB,LRRC4C,GRIK2,GRID2,SLC1A3,SIPA1L1,SLC6A1,MEF2C,PCDH17,KIT,PLCB1,SV2B,ROR2,NLGN1,CHRDL1,NLGN4Y,PRKN,PTN,OPHN1,NRXN3,CACNA1B,SNCAIP,GRIK1,CPLX1,EPHB1,EPHA7,CA2,MME,DCC,PXK,APOE,BTBD9,SLC7A11,APBA1
GO:BP	ameboidal-type cell migration	GO:0001667	0.00019531	3.70928	429	873	43	21110	FAP,PROX1,SCARB1,PRKCA,SASH1,SEMA5B,HDAC9,MEF2C,KIT,SEMA6A,PTPRG,SEMA5A,RHOJ,DUSP10,FUT8,ARID5B,BCAS3,EGF,PTN,VEGFC,NR4A1,VSTM4,PRR5L,APOE,PTPN11,ANGPT2,PIK3R3,BMPER,SLC8A1,NRP1,HMGB1,SEMA6D,TMSB4X,DOCK5,FGF10,SEMA3A,GATA3,PRKX,SCG2,PAK3,KANK2,DCN,STARD13
GO:BP	regulation of trans-synaptic signaling	GO:0099177	0.000198892	3.70138	491	525	34	21110	DGKB,LRRC4C,GRIK2,GRID2,SLC1A3,SIPA1L1,SLC6A1,MEF2C,PCDH17,KIT,PLCB1,SV2B,ROR2,NLGN1,CHRDL1,NLGN4Y,PRKN,PTN,OPHN1,NRXN3,CACNA1B,SNCAIP,GRIK1,CPLX1,EPHB1,EPHA7,CA2,MME,DCC,PXK,APOE,BTBD9,SLC7A11,APBA1
GO:BP	plasma membrane bounded cell projection organization	GO:0120036	0.000211998	3.67367	1535	284	47	21110	NFIB,LRRC4C,TNIK,EPHA3,GRID2,CHL1,CNTN1,COBL,CDH23,LAMA1,HECW2,SIPA1L1,UST,FGF13,SEMA5B,HES5,PLCE1,MEF2C,SNX10,KIT,NEDD4L,NYAP2,DCLK1,MINAR1,CD44,PCDH15,FSIP2,DOCK10,SEMA6A,SPOCK1,CDH4,ROR2,PTPRG,RIPOR2,BTG2,KREMEN1,SEZ6,SEMA5A,SFRP1,NLGN1,RP1,PRKN,BCAS3,TIAM1,PTN,OPHN1,NRXN3
GO:BP	cell-cell signaling	GO:0007267	0.000228075	3.64192	1696	402	64	21110	DGKB,WIF1,GABRG3,LRRC4C,VIPR2,TNIK,GRIK2,GRID2,WNT5B,SLC1A3,KDM5B,SIPA1L1,FGF13,KCNA2,LIMD1,PCDH11Y,SLC6A1,MEF2C,PCDH17,KIT,PLCB1,SV2B,PCSK5,EGR1,MPZ,LIN7A,ROR2,NPVF,KREMEN1,SEZ6,CCDC88C,SEMA5A,SFRP1,NLGN1,CHRDL1,RIMBP2,CRY1,NLGN4Y,SOX13,PRKN,TIAM1,WWOX,EGF,PTN,OPHN1,NRXN3,HMGA2,CACNA1B,WNK2,G6PC2,SNCAIP,SLC1A4,NR4A1,GRIK1,ALPK2,CPLX1,IL1RAPL1,EPHB1,EPHA7,BMP2,CA2,RPS6KA3,MITF,MME
GO:BP	response to stimulus	GO:0050896	0.000234039	3.63071	9081	233	140	21110	DGKB,WIF1,TF,FLT1,GABRG3,NFIB,CADM1,DST,FAP,RARB,SOX5,VIPR2,TNIK,EPHA3,GRIK2,GRID2,SRGAP1,APBB2,CHL1,PROX1,CNTN1,RLBP1,RASGRP1,STAC,ST3GAL1,WNT5B,ARHGEF3,NCALD,SCARB1,PRKCA,QDPR,SASH1,SLC1A3,ALDH1A2,CDH23,LAMA1,PDGFC,KDM5B,RGR,PPP3CC,STK39,SIPA1L1,SERINC5,F3,GUCY1A2,CGNL1,TRPM3,PTH2R,DNER,NFIA,FGF13,SOX6,ST8SIA1,SEMA5B,EPAS1,NRG1,RASGEF1B,LIMD1,ZC3HAV1,CALM1,HES5,PCDH11Y,MAPK4,RHPN2,PLCE1,SLC15A3…
GO:BP	epithelial cell migration	GO:0010631	0.000292194	3.53433	302	873	34	21110	FAP,PROX1,SCARB1,PRKCA,SASH1,HDAC9,MEF2C,KIT,PTPRG,SEMA5A,RHOJ,DUSP10,BCAS3,EGF,PTN,VEGFC,NR4A1,VSTM4,APOE,PTPN11,ANGPT2,PIK3R3,BMPER,NRP1,HMGB1,TMSB4X,DOCK5,FGF10,GATA3,PRKX,SCG2,KANK2,DCN,STARD13
GO:BP	anterograde trans-synaptic signaling	GO:0098916	0.000339655	3.46896	752	525	44	21110	DGKB,GABRG3,LRRC4C,GRIK2,GRID2,SLC1A3,SIPA1L1,SLC6A1,MEF2C,PCDH17,KIT,PLCB1,SV2B,MPZ,LIN7A,ROR2,SEZ6,NLGN1,CHRDL1,RIMBP2,NLGN4Y,PRKN,PTN,OPHN1,NRXN3,CACNA1B,SNCAIP,SLC1A4,NR4A1,GRIK1,CPLX1,EPHB1,EPHA7,CA2,RPS6KA3,MME,DCC,PXK,APOE,BTBD9,TMOD2,CADPS,SLC7A11,APBA1
GO:BP	chemical synaptic transmission	GO:0007268	0.000339655	3.46896	752	525	44	21110	DGKB,GABRG3,LRRC4C,GRIK2,GRID2,SLC1A3,SIPA1L1,SLC6A1,MEF2C,PCDH17,KIT,PLCB1,SV2B,MPZ,LIN7A,ROR2,SEZ6,NLGN1,CHRDL1,RIMBP2,NLGN4Y,PRKN,PTN,OPHN1,NRXN3,CACNA1B,SNCAIP,SLC1A4,NR4A1,GRIK1,CPLX1,EPHB1,EPHA7,CA2,RPS6KA3,MME,DCC,PXK,APOE,BTBD9,TMOD2,CADPS,SLC7A11,APBA1
GO:BP	epithelium migration	GO:0090132	0.000370533	3.43117	305	873	34	21110	FAP,PROX1,SCARB1,PRKCA,SASH1,HDAC9,MEF2C,KIT,PTPRG,SEMA5A,RHOJ,DUSP10,BCAS3,EGF,PTN,VEGFC,NR4A1,VSTM4,APOE,PTPN11,ANGPT2,PIK3R3,BMPER,NRP1,HMGB1,TMSB4X,DOCK5,FGF10,GATA3,PRKX,SCG2,KANK2,DCN,STARD13
GO:BP	synaptic signaling	GO:0099536	0.000377344	3.42326	781	525	45	21110	DGKB,GABRG3,LRRC4C,GRIK2,GRID2,SLC1A3,SIPA1L1,SLC6A1,MEF2C,PCDH17,KIT,PLCB1,SV2B,MPZ,LIN7A,ROR2,SEZ6,NLGN1,CHRDL1,RIMBP2,NLGN4Y,PRKN,PTN,OPHN1,NRXN3,CACNA1B,SNCAIP,SLC1A4,NR4A1,GRIK1,CPLX1,IL1RAPL1,EPHB1,EPHA7,CA2,RPS6KA3,MME,DCC,PXK,APOE,BTBD9,TMOD2,CADPS,SLC7A11,APBA1
GO:BP	vasculature development	GO:0001944	0.000389866	3.40909	737	613	48	21110	FLT1,SAT1,FAP,PROX1,PRKCA,SASH1,ALDH1A2,LAMA1,F3,EPAS1,THSD7A,HEY2,HDAC9,MEF2C,KIT,MINAR1,PCSK5,EGR1,PDGFRA,SEMA6A,SEMA5A,SFRP1,RHOJ,MYO1E,NFATC2,BCAS3,EGF,NRXN3,HMGA2,DDAH1,VEGFC,STAT3,NR4A1,EPHB1,VSTM4,ROM1,ADAMTS6,APOE,CNMD,ANGPT2,ADAM12,SMAD6,CCN1,PIK3R3,BMPER,HES1,FOXO1,NRP1
GO:BP	cell projection organization	GO:0030030	0.000435379	3.36113	1573	284	47	21110	NFIB,LRRC4C,TNIK,EPHA3,GRID2,CHL1,CNTN1,COBL,CDH23,LAMA1,HECW2,SIPA1L1,UST,FGF13,SEMA5B,HES5,PLCE1,MEF2C,SNX10,KIT,NEDD4L,NYAP2,DCLK1,MINAR1,CD44,PCDH15,FSIP2,DOCK10,SEMA6A,SPOCK1,CDH4,ROR2,PTPRG,RIPOR2,BTG2,KREMEN1,SEZ6,SEMA5A,SFRP1,NLGN1,RP1,PRKN,BCAS3,TIAM1,PTN,OPHN1,NRXN3
GO:BP	circulatory system development	GO:0072359	0.000460873	3.33642	1123	166	27	21110	FLT1,SAT1,FAP,RARB,PROX1,PRKCA,SASH1,ALDH1A2,LAMA1,F3,SOX6,EPAS1,NRG1,THSD7A,PLCE1,HEY2,HDAC9,MEF2C,KIT,MINAR1,ABI3BP,ID2,PCSK5,UTY,EGR1,PDGFRA,SEMA6A
GO:BP	synapse organization	GO:0050808	0.000464024	3.33346	474	385	27	21110	DGKB,LRRC4C,GRID2,APBB2,SIPA1L1,DNER,NFIA,FGF13,SLC6A1,MEF2C,PCDH17,DOCK10,NOS1AP,ROR2,SEZ6,NLGN1,CHRDL1,NLGN4Y,LRRN3,OPHN1,NRXN3,NFASC,IL1RAPL1,EPHB1,CTTNBP2,EPHA7,CTNNA2
GO:BP	negative regulation of neuron projection development	GO:0010977	0.00052705	3.27815	141	851	21	21110	FGF13,SEMA5B,MINAR1,SEMA6A,SPOCK1,PTPRG,KREMEN1,SEMA5A,NLGN1,EPHA7,DCC,APOE,HES1,DAB1,NRP1,SEMA6D,SEMA3A,CBFA2T2,NTN1,TNR,TRPV4
GO:BP	transmembrane receptor protein tyrosine kinase signaling pathway	GO:0007169	0.000538223	3.26904	632	613	43	21110	FLT1,CADM1,EPHA3,PDGFC,SIPA1L1,F3,NRG1,PLCE1,KIT,PLCB1,PDGFRA,SEMA6A,ARHGEF28,CLNK,ROR2,PTPRG,PID1,MYO1E,ARID5B,KIF16B,TIAM1,EGF,VEGFC,STAT3,PDE6H,EPHB1,EPHA7,BMP2,SORL1,ADAMTS12,ERBB3,GAREM1,MTSS1,PTPN11,ANGPT2,CBL,NR4A3,OTX2,PIK3R3,IDE,SORBS1,FOXO1,NRP1
GO:BP	regulation of muscle cell differentiation	GO:0051147	0.000557765	3.25355	137	135	9	21110	PROX1,LAMA1,SOX6,NRG1,HEY2,HDAC9,MEF2C,KIT,ID2
GO:BP	detection of light stimulus	GO:0009583	0.000573264	3.24165	70	554	12	21110	RGR,SEMA5B,RRH,RCVRN,PDC,RP1,AIPL1,GNGT2,ROM1,GNAT1,NR2E3,PRPH2
GO:BP	regulation of anatomical structure morphogenesis	GO:0022603	0.000575672	3.23983	880	618	54	21110	FLT1,LRRC4C,TNIK,WNT5B,PRKCA,SASH1,HECW2,SIPA1L1,F3,UST,FGF13,SEMA5B,LIMD1,MEF2C,KIT,NEDD4L,MINAR1,CD44,SEMA6A,PALMD,CDH4,ROR2,SEMA5A,PID1,SFRP1,RHOJ,NLGN1,PRKN,TIAM1,EGF,HMGA2,DDAH1,VEGFC,MYH14,STAT3,IL1RAPL1,NTN4,EPHA7,BMP2,DCC,FGD3,ADAMTS12,CNMD,FBLIM1,ANGPT2,ADAM12,ITSN2,OTX2,KIF13B,BMPER,HES1,DAB1,NRP1,SEMA6D
GO:BP	tissue migration	GO:0090130	0.000589352	3.22963	311	873	34	21110	FAP,PROX1,SCARB1,PRKCA,SASH1,HDAC9,MEF2C,KIT,PTPRG,SEMA5A,RHOJ,DUSP10,BCAS3,EGF,PTN,VEGFC,NR4A1,VSTM4,APOE,PTPN11,ANGPT2,PIK3R3,BMPER,NRP1,HMGB1,TMSB4X,DOCK5,FGF10,GATA3,PRKX,SCG2,KANK2,DCN,STARD13
GO:BP	cell adhesion	GO:0007155	0.000603005	3.21968	1530	617	80	21110	CADM1,DST,LRRC4C,FAP,EPHA3,GRID2,CHL1,CNTN1,FRMD5,RASGRP1,LSAMP,PRKCA,CDH23,LAMA1,NRG1,HES5,PCDH11Y,ITGB5,PCDH17,KIT,CDON,ABI3BP,CD44,PCDH15,PAG1,PDGFRA,MPZ,SEMA6A,SPOCK1,CDH4,RIPOR2,SEMA5A,SFRP1,NLGN1,DUSP10,FREM1,NLGN4Y,SOX13,BCAS3,TIAM1,NRXN3,NFASC,IL1RAPL1,NTN4,CORO2B,EPHB1,CADM2,EPHA7,CTNNA2,BMP2,ROM1,LIMS1,DCC,MEGF10,CYTH1,ADAM23,ADAMTS12,ERBB3,MTSS1,PTPN11,FBLIM1,ANGPT2,SLC7A11,ADAM12,APBA…
GO:BP	muscle cell differentiation	GO:0042692	0.000619229	3.20815	384	842	38	21110	RARB,PROX1,WNT5B,LAMA1,DNER,SOX6,NRG1,HEY2,HDAC9,MEF2C,KIT,CDON,ID2,PDGFRA,RIPOR2,NFATC2,ATP11A,ALPK2,CAPN3,BMP2,MEGF10,KCNH1,MRTFA,TMOD2,ADAM12,HES1,SLC8A1,ZEB1,NACA,ACTG1,DOCK5,FGF10,ADAMTS15,YBX1,SORT1,PPARA,PLPP7,CTH
GO:BP	regulation of cell motility	GO:2000145	0.000630096	3.20059	988	873	75	21110	TF,FLT1,SRGAP1,PROX1,FRMD5,WNT5B,SCARB1,PRKCA,SASH1,LAMA1,PDGFC,STK39,F3,SEMA5B,HDAC9,MEF2C,KIT,NAV3,PLCB1,DOCK10,PDGFRA,SEMA6A,ROR2,PTPRG,RIPOR2,SEMA5A,SFRP1,RHOJ,DUSP10,BCAS3,TIAM1,EGF,PTN,VEGFC,STAT3,CTNNA2,BMP2,PRR5L,MITF,SORL1,ATP8A1,APOE,ANGPT2,IL1R1,NR4A3,CCN1,BRMS1L,PIK3R3,BMPER,SLC8A1,NRP1,UNC5D,HMGB1,SEMA6D,RACK1,MIF,TMSB4X,ACTG1,DOCK5,FGF10,SEMA3A,LRCH1,GATA3,PRKX,GCNT2,PADI2,NKD1,NTN1…
GO:BP	regulation of cell differentiation	GO:0045595	0.000760709	3.11878	1568	853	104	21110	WIF1,RARB,SOX5,EPHA3,PROX1,RASGRP1,PRKCA,LAMA1,FGF13,SOX6,SEMA5B,NRG1,LIMD1,HES5,HEY2,HDAC9,MEF2C,KIT,CDON,ABI3BP,ID2,PLCB1,PDGFRA,SEMA6A,RBFOX1,FOS,CDH4,ROR2,RIPOR2,BTG2,SEMA5A,KDM4C,SFRP1,NLGN1,NFATC2,DUSP10,SOX13,TIAM1,PTN,PDE3A,ABCG1,NEUROD4,GNB3,VEGFC,STAT3,ATP11A,CAPN3,IL1RAPL1,EPHB1,EPHA7,BMP2,RPS6KA3,MITF,MME,DCC,MEGF10,GRHL1,SORL1,ADAMTS12,PCP4,NCOA3,PTPN11,CCDC3,SMAD6,MAP3K5,INHBA,CCN1,…
GO:BP	endothelial cell migration	GO:0043542	0.000788758	3.10306	217	873	27	21110	FAP,PROX1,SCARB1,PRKCA,SASH1,HDAC9,MEF2C,SEMA5A,RHOJ,BCAS3,EGF,PTN,VEGFC,NR4A1,VSTM4,APOE,ANGPT2,PIK3R3,BMPER,NRP1,HMGB1,TMSB4X,GATA3,PRKX,SCG2,DCN,STARD13
GO:BP	muscle tissue development	GO:0060537	0.000805948	3.09369	410	198	17	21110	RARB,PROX1,ALDH1A2,DNER,SOX6,NRG1,HEY2,HDAC9,MEF2C,CDON,ID2,EGR1,PDGFRA,RBFOX1,FOS,RIPOR2,BTG2
GO:BP	positive regulation of cellular process	GO:0048522	0.000808719	3.0922	5615	118	57	21110	WIF1,TF,FLT1,NFIB,CADM1,FAP,RARB,SOX5,TNIK,CREB5,EPHA3,GRIK2,GRID2,APBB2,PROX1,CNTN1,FRMD5,RASGRP1,GLIS3,STAC,NFIX,WNT5B,COBL,ARHGEF3,SCARB1,PRKCA,SASH1,SLC1A3,ALDH1A2,SLAIN1,LAMA1,PDGFC,KDM5B,PPP3CC,STK39,F3,GUCY1A2,NFIA,LUM,SOX6,ST8SIA1,SEMA5B,EPAS1,NRG1,ZC3HAV1,CALM1,HES5,PCDH11Y,PLCE1,SLC15A3,HEY2,RGS7,HDAC9,MEF2C,NR3C2,KIT,NEDD4L
GO:BP	regulation of locomotion	GO:0040012	0.000892982	3.04916	1033	873	77	21110	TF,FLT1,SRGAP1,PROX1,FRMD5,WNT5B,SCARB1,PRKCA,SASH1,LAMA1,PDGFC,STK39,F3,SEMA5B,HDAC9,MEF2C,KIT,NAV3,PLCB1,DOCK10,PDGFRA,SEMA6A,ROR2,PTPRG,RIPOR2,SEMA5A,SFRP1,RHOJ,DUSP10,BCAS3,TIAM1,EGF,PTN,VEGFC,STAT3,CTNNA2,BMP2,PRR5L,MITF,SORL1,ATP8A1,APOE,ANGPT2,IL1R1,NR4A3,CCN1,BRMS1L,PIK3R3,BMPER,SLC8A1,NRP1,UNC5D,HMGB1,SEMA6D,RACK1,MIF,TMSB4X,ACTG1,DOCK5,FGF10,SEMA3A,LRCH1,GATA3,PRKX,GCNT2,SCG2,PADI2,TSHR…
GO:BP	nervous system process	GO:0050877	0.000933443	3.02991	1524	554	73	21110	GABRG3,NAV2,GRIK2,GRID2,CHL1,RLBP1,STAC,SLC1A3,CDH23,RGR,ATP2B2,TRPM3,FGF13,KCNA2,LUM,SEMA5B,EPAS1,SLC6A1,MEF2C,KIT,MYO6,PLCB1,PCDH15,ANKFN1,LHCGR,RGS16,RBFOX1,CRYM,THRB,FOS,RRH,RCVRN,RIPOR2,BTG2,SEZ6,SRRM4,SCN1A,NLGN1,PDC,NLGN4Y,RP1,PRKN,PTN,ATXN1,NRXN3,NFASC,AIPL1,NRL,MYH14,SLC1A4,PDE6H,NR4A1,EPHB1,CTNNA2,MME,ROM1,SHROOM4,SCN9A,GNAT1,KCNH1,ATP8A1,APOE,RAX2,BTBD9,TMOD2,CRX,IMPG2,NR2E3,SLC7A11,ST…
GO:BP	actin filament-based process	GO:0030029	0.00115035	2.93917	817	280	30	21110	TF,TNIK,EPHA3,PROX1,FRMD5,COBL,SIPA1L1,CGNL1,FGF13,THSD7A,RHPN2,ITGB5,KIT,NEDD4L,MYO5B,MYO6,PCDH15,PDGFRA,GPD1L,NOS1AP,CCDC88C,SEMA5A,SFRP1,SCN1A,RHOJ,MYO1E,PRKN,BCAS3,SVIL,OPHN1
GO:BP	regulation of transport	GO:0051049	0.00128892	2.88977	1771	617	88	21110	TF,EPHA3,CNTN1,STAC,SCARB1,HECW2,KDM5B,PPP3CC,STK39,FGF13,KCNA2,KCNH8,NRG1,CALM1,SLC6A1,RGS7,MEF2C,NEDD4L,MYO6,PLCB1,SV2B,LHCGR,GPD1L,RCVRN,NOS1AP,NPVF,BEST3,PID1,SFRP1,SCN1A,NLGN1,KCNH7,TTC39B,CRY1,PRKN,KCNIP4,BCAS3,DPP10,EGF,OPHN1,ABCG1,MTCL1,CACNA1B,WNK2,G6PC2,VEGFC,SNCAIP,AAK1,CPLX1,CAPN3,IL1RAPL1,BMP2,CA2,PRR5L,CRYAB,LLGL2,PLA2R1,CABP5,SCN9A,KCNH1,TMEM74,SORL1,ATP8A1,PXK,ERBB3,APOE,SCAMP5,TB…
GO:BP	cellular response to stimulus	GO:0051716	0.00139161	2.85648	7521	262	132	21110	DGKB,WIF1,TF,FLT1,GABRG3,CADM1,DST,RARB,VIPR2,TNIK,EPHA3,GRIK2,GRID2,SRGAP1,APBB2,CHL1,PROX1,CNTN1,RASGRP1,STAC,WNT5B,ARHGEF3,NCALD,SCARB1,PRKCA,QDPR,SASH1,SLC1A3,ALDH1A2,LAMA1,PDGFC,KDM5B,RGR,PPP3CC,STK39,SIPA1L1,F3,GUCY1A2,CGNL1,PTH2R,DNER,NFIA,FGF13,ST8SIA1,SEMA5B,EPAS1,NRG1,RASGEF1B,LIMD1,ZC3HAV1,CALM1,HES5,PCDH11Y,MAPK4,RHPN2,PLCE1,SLC15A3,HEY2,DUSP16,RGS7,HDAC9,MEF2C,SNX10,ITGB5,NR3C2,KIT,N…
GO:BP	neural precursor cell proliferation	GO:0061351	0.00151208	2.82043	157	367	14	21110	NFIB,SOX5,PROX1,NFIA,FGF13,CDON,ID2,BTG2,EGF,PTN,NEUROD4,VEGFC,ACSL6,EPHB1
GO:BP	cell junction organization	GO:0034330	0.00157793	2.80191	740	471	39	21110	DGKB,DST,LRRC4C,EPHA3,GRID2,APBB2,PRKCA,SIPA1L1,DNER,NFIA,FGF13,SLC6A1,MEF2C,PCDH17,DOCK10,MPP7,NOS1AP,ROR2,SEZ6,SFRP1,NLGN1,CHRDL1,NLGN4Y,LRRN3,BCAS3,OPHN1,NRXN3,NFASC,IL1RAPL1,CORO2B,EPHB1,CTTNBP2,EPHA7,CTNNA2,LIMS1,GRHL1,SYNDIG1,PRMT3,APOE
GO:BP	sensory perception of sound	GO:0007605	0.00165486	2.78124	165	207	11	21110	NAV2,SLC1A3,CDH23,ATP2B2,KIT,MYO6,PCDH15,CRYM,THRB,RIPOR2,SRRM4
GO:BP	blood vessel development	GO:0001568	0.00173429	2.76088	706	613	45	21110	FLT1,SAT1,FAP,PROX1,PRKCA,SASH1,ALDH1A2,LAMA1,F3,EPAS1,THSD7A,HEY2,HDAC9,MEF2C,MINAR1,PCSK5,EGR1,PDGFRA,SEMA6A,SEMA5A,SFRP1,RHOJ,MYO1E,BCAS3,EGF,NRXN3,HMGA2,DDAH1,VEGFC,STAT3,NR4A1,EPHB1,VSTM4,ADAMTS6,APOE,CNMD,ANGPT2,ADAM12,SMAD6,CCN1,PIK3R3,BMPER,HES1,FOXO1,NRP1
GO:BP	MAPK cascade	GO:0000165	0.00180853	2.74267	772	617	48	21110	TF,FLT1,TNIK,RASGRP1,PRKCA,SASH1,PDGFC,STK39,FGF13,NRG1,MAPK4,PLCE1,DUSP16,MEF2C,KIT,CDON,CD44,PLCB1,PDGFRA,SEMA6A,ROR2,MAP3K1,SFRP1,DUSP10,PRKN,EGF,WNK2,PDE6H,KSR1,SH2D3C,EPHB1,EPHA7,BMP2,CRYAB,GADD45G,SORL1,APOE,MAP2K6,GAREM1,PTPN11,MAP3K5,INHBA,TAOK3,CCN1,BMPER,FOXO1,NRP1,HMGB1
GO:BP	sensory perception of mechanical stimulus	GO:0050954	0.00199477	2.70011	188	225	12	21110	NAV2,SLC1A3,CDH23,ATP2B2,KIT,MYO6,PCDH15,CRYM,THRB,RIPOR2,SRRM4,SCN1A
GO:BP	oligopeptide transport	GO:0006857	0.00221709	2.65422	9	514	5	21110	SLC15A3,SLC15A2,CA2,ABCB9,SLC7A11
GO:BP	oligopeptide transmembrane transport	GO:0035672	0.00221709	2.65422	9	514	5	21110	SLC15A3,SLC15A2,CA2,ABCB9,SLC7A11
GO:BP	muscle organ development	GO:0007517	0.00226786	2.64438	351	430	23	21110	PROX1,DNER,SOX6,NRG1,HEY2,HDAC9,MEF2C,CDON,EGR1,RBFOX1,FOS,RIPOR2,BTG2,ARID5B,SVIL,MYH14,NR4A1,CAPN3,EPHB1,TLL2,BMP2,CRYAB,MEGF10
GO:BP	positive regulation of intracellular signal transduction	GO:1902533	0.00238393	2.62271	997	754	66	21110	FLT1,TNIK,PROX1,RASGRP1,ARHGEF3,PRKCA,SASH1,PDGFC,PPP3CC,STK39,F3,GUCY1A2,NRG1,ZC3HAV1,PLCE1,MEF2C,NR3C2,KIT,CDON,CD44,PLCB1,LHCGR,PDGFRA,NOS1AP,ROR2,SEMA5A,NLGN1,PRKN,EGF,PDE6H,KSR1,BMP2,PRR5L,GPR137C,LIMS1,PLA2R1,GADD45G,ERBB3,APOE,MAP2K6,GAREM1,PTPN11,CBL,MAP3K5,INHBA,TAOK3,BMPER,NRP1,HMGB1,GAPDH,RPL11,RPS15,RPS7,RACK1,MIF,RPS3,RPS20,RPL23,RPL26,HIP1,RPL37,FGF10,SEMA3A,GATA3,SH3RF3,GCNT2
GO:BP	ribosomal large subunit assembly	GO:0000027	0.00239269	2.62111	24	747	8	21110	RPL10,RPLP0,RPL11,RPL6,RPL5,RPL38,RPL23A,NOP53
GO:BP	negative regulation of neurogenesis	GO:0050768	0.00266828	2.57377	148	818	20	21110	PROX1,FGF13,SEMA5B,HES5,SEMA6A,BTG2,SEMA5A,DUSP10,PTN,EPHA7,DCC,SORL1,HES1,DAB1,NRP1,BRINP1,SEMA6D,SEMA3A,NTN1,TNR
GO:BP	regulation of multicellular organismal development	GO:2000026	0.003017	2.52042	1407	618	73	21110	FLT1,RARB,SOX5,GRID2,PROX1,RASGRP1,PRKCA,SASH1,LAMA1,F3,FGF13,SOX6,SEMA5B,NRG1,HES5,HEY2,MEF2C,KIT,CDON,MINAR1,ID2,PLCB1,SEMA6A,FOS,CDH4,ROR2,BTG2,SEMA5A,SFRP1,RHOJ,NLGN1,DUSP10,SOX13,LRRN3,TIAM1,EGF,PTN,HMGA2,DDAH1,VEGFC,STAT3,CAPN3,IL1RAPL1,EPHB1,EPHA7,BMP2,MITF,MME,DCC,GRHL1,SYNDIG1,SORL1,ADAMTS12,NCOA3,CNMD,PTPN11,ANGPT2,ADAM12,INHBA,OTX2,CCN1,IL15,BMPER,TENT5A,HES1,SLC8A1,ZEB1,ASCL1,DAB1,NRP…
GO:BP	positive regulation of cell migration	GO:0030335	0.00337215	2.47209	532	754	42	21110	FLT1,PROX1,WNT5B,SCARB1,PRKCA,SASH1,PDGFC,STK39,F3,SEMA5B,HDAC9,KIT,PDGFRA,SEMA6A,ROR2,RIPOR2,SEMA5A,RHOJ,BCAS3,TIAM1,EGF,PTN,VEGFC,STAT3,BMP2,ATP8A1,IL1R1,NR4A3,CCN1,PIK3R3,SLC8A1,NRP1,HMGB1,SEMA6D,RACK1,TMSB4X,ACTG1,DOCK5,FGF10,SEMA3A,GATA3,GCNT2
GO:BP	regulation of neuron death	GO:1901214	0.00340665	2.46767	324	782	31	21110	GRIK2,GRID2,CHL1,TRIM2,MEF2C,NCOA7,EGR1,CPEB4,FOS,BTG2,PRKN,EPHB1,EPHA7,DCC,SORL1,ERBB3,APOE,SLC7A11,CBL,RETREG1,NR4A3,MAP3K5,ASCL1,NRP1,RACK1,CCND1,NES,GATA3,SET,BCL2L1,PPARA
GO:BP	regulation of synaptic vesicle endocytosis	GO:1900242	0.00342602	2.46521	19	699	7	21110	PPP3CC,NLGN1,PRKN,OPHN1,BTBD9,ACTB,ACTG1
GO:BP	axon guidance	GO:0007411	0.00343906	2.46356	249	818	27	21110	NFIB,EPHA3,CHL1,CNTN1,LAMA1,SEMA5B,KIT,SEMA6A,CDH4,SEMA5A,OPHN1,NRXN3,NFASC,CRPPA,EPHB1,EPHA7,DCC,OTX2,NRP1,UNC5D,SEMA6D,BCL11B,SEMA3A,GATA3,LRTM1,NTN1,TNR
GO:BP	regulation of response to stimulus	GO:0048583	0.0036211	2.44116	4013	886	224	21110	WIF1,FLT1,CADM1,FAP,TNIK,GRID2,PROX1,RASGRP1,WNT5B,ARHGEF3,PRKCA,SASH1,LAMA1,PDGFC,PPP3CC,STK39,SIPA1L1,F3,GUCY1A2,CGNL1,SEMA5B,NRG1,LIMD1,ZC3HAV1,CALM1,HES5,PCDH11Y,PLCE1,SLC15A3,HEY2,DUSP16,RGS7,MEF2C,NR3C2,KIT,CDON,MINAR1,CD44,PLCB1,NCOA7,GNG7,EGR1,LHCGR,PDGFRA,GPD1L,RGS16,SEMA6A,THRB,ARHGEF28,ARHGAP42,NOS1AP,CLNK,ROR2,SLC15A2,RIPOR2,MAP3K1,PCSK6,KREMEN1,SEZ6,CCDC88C,SEMA5A,KDM4C,PID1,SFRP1,NP…
GO:BP	positive regulation of locomotion	GO:0040017	0.00362585	2.44059	574	851	48	21110	TF,FLT1,PROX1,WNT5B,SCARB1,PRKCA,SASH1,PDGFC,STK39,F3,SEMA5B,HDAC9,KIT,PDGFRA,SEMA6A,ROR2,RIPOR2,SEMA5A,RHOJ,BCAS3,TIAM1,EGF,PTN,VEGFC,STAT3,BMP2,ATP8A1,IL1R1,NR4A3,CCN1,PIK3R3,SLC8A1,NRP1,HMGB1,SEMA6D,RACK1,TMSB4X,ACTG1,DOCK5,FGF10,SEMA3A,GATA3,GCNT2,SCG2,NTN1,PAK3,ABL2,TRPV4
GO:BP	positive regulation of cell motility	GO:2000147	0.00370522	2.43119	558	279	23	21110	TF,FLT1,PROX1,WNT5B,SCARB1,PRKCA,SASH1,PDGFC,STK39,F3,SEMA5B,HDAC9,KIT,PDGFRA,SEMA6A,ROR2,RIPOR2,SEMA5A,RHOJ,BCAS3,TIAM1,EGF,PTN
GO:BP	neuron projection guidance	GO:0097485	0.00371661	2.42985	250	818	27	21110	NFIB,EPHA3,CHL1,CNTN1,LAMA1,SEMA5B,KIT,SEMA6A,CDH4,SEMA5A,OPHN1,NRXN3,NFASC,CRPPA,EPHB1,EPHA7,DCC,OTX2,NRP1,UNC5D,SEMA6D,BCL11B,SEMA3A,GATA3,LRTM1,NTN1,TNR
GO:BP	stem cell differentiation	GO:0048863	0.00409373	2.38788	246	291	15	21110	SOX5,ALDH1A2,SOX6,SEMA5B,NRG1,HES5,MEF2C,KIT,PDGFRA,SEMA6A,SEMA5A,KDM4C,SFRP1,PTN,HMGA2
GO:BP	regulation of cellular process	GO:0050794	0.00427298	2.36927	11108	202	139	21110	DGKB,WIF1,TF,FLT1,GABRG3,NFIB,CADM1,DST,LRRC4C,FAP,RARB,SOX5,VIPR2,TNIK,CREB5,EPHA3,GRIK2,GRID2,SRGAP1,APBB2,CHL1,PROX1,CNTN1,FABP7,FRMD5,RASGRP1,GLIS3,STAC,NFIX,ST3GAL1,WNT5B,COBL,ARHGEF3,NCALD,SCARB1,PRKCA,SASH1,SLC1A3,ALDH1A2,SLAIN1,LAMA1,HECW2,PDGFC,KDM5B,RGR,PPP3CC,STK39,SIPA1L1,F3,UST,GUCY1A2,CGNL1,TRIM2,PTH2R,DNER,NFIA,FGF13,KCNA2,LUM,SOX6,KCNH8,ST8SIA1,SEMA5B,EPAS1,NRG1,RASGEF1B,LIMD1,ZC3…
GO:BP	positive regulation of biological process	GO:0048518	0.00428742	2.3678	6358	118	60	21110	WIF1,TF,FLT1,NFIB,CADM1,FAP,RARB,SOX5,TNIK,CREB5,EPHA3,GRIK2,GRID2,APBB2,PROX1,CNTN1,FRMD5,RASGRP1,GLIS3,STAC,NFIX,WNT5B,COBL,ARHGEF3,SCARB1,PRKCA,SASH1,SLC1A3,ALDH1A2,SLAIN1,LAMA1,PDGFC,KDM5B,PPP3CC,STK39,F3,GUCY1A2,PTH2R,NFIA,LUM,SOX6,ST8SIA1,SEMA5B,EPAS1,NRG1,LIMD1,ZC3HAV1,CALM1,HES5,PCDH11Y,PLCE1,SLC15A3,SLC6A1,HEY2,RGS7,HDAC9,MEF2C,NR3C2,KIT,NEDD4L
GO:BP	monoatomic ion transport	GO:0006811	0.00441244	2.35532	1274	109	21	21110	TF,GABRG3,GRIK2,GRID2,CNTN1,STAC,SLC1A3,CDH23,HECW2,PPP3CC,STK39,ATP2B2,TRPM3,FGF13,KCNA2,KCNH8,CALM1,SLC15A3,SLC6A1,SLC6A11,RGS7
GO:BP	skeletal muscle tissue development	GO:0007519	0.00443757	2.35285	169	373	14	21110	DNER,HDAC9,MEF2C,CDON,EGR1,RBFOX1,FOS,RIPOR2,BTG2,SVIL,MYH14,NR4A1,EPHB1,TLL2
GO:BP	regulation of MAP kinase activity	GO:0043405	0.00463179	2.33425	184	677	20	21110	FLT1,RASGRP1,SASH1,PDGFC,DUSP16,MEF2C,KIT,ROR2,SFRP1,DUSP10,EGF,KSR1,BMP2,SORL1,APOE,MAP2K6,MAP3K5,TAOK3,MIF,RPS3
GO:BP	N-glycan processing	GO:0006491	0.00470983	2.32699	21	406	6	21110	ST8SIA5,ST8SIA1,MAN1C1,FUT8,GANC,ST8SIA4
GO:BP	secretion	GO:0046903	0.00473459	2.32472	955	610	54	21110	RASGRP1,KDM5B,STK39,KCNA2,NRG1,SLC6A1,MEF2C,SNX10,KIT,MYO6,PLCB1,SV2B,PCSK5,LHCGR,MTTP,LIN7A,CLNK,NPVF,PCSK6,SFRP1,NLGN1,AQP9,CRY1,PRKN,EGF,NRXN3,ABCG1,G6PC2,ITSN1,VEGFC,SNCAIP,NR4A1,CPLX1,IL1RAPL1,SYT16,BMP2,CA2,LLGL2,PLA2R1,ERBB3,APOE,SCAMP5,MAP2K6,PTPN11,CADPS,CBL,APBA1,ATP9A,NR4A3,INHBA,RAPGEF4,SCFD2,NNAT,FOXO1
GO:BP	negative regulation of nervous system development	GO:0051961	0.00501603	2.29964	154	818	20	21110	PROX1,FGF13,SEMA5B,HES5,SEMA6A,BTG2,SEMA5A,DUSP10,PTN,EPHA7,DCC,SORL1,HES1,DAB1,NRP1,BRINP1,SEMA6D,SEMA3A,NTN1,TNR
GO:BP	rRNA processing	GO:0006364	0.00512373	2.29041	229	748	24	21110	RPL7,RPS16,RPL7A,RPL11,RPS15,RPS28,RPL10A,RPS7,RPL5,RPS14,RPS24,RPS25,RPS6,RPS27,RPS19,RPL14,RPL35,RPS8,RPL26,RPL27,RPL35A,RPS17,NOP53,RPS21
GO:BP	regulation of nervous system development	GO:0051960	0.00556916	2.25421	461	618	33	21110	GRID2,PROX1,FGF13,SEMA5B,HES5,HEY2,KIT,CDON,ID2,SEMA6A,CDH4,BTG2,SEMA5A,NLGN1,DUSP10,LRRN3,TIAM1,PTN,VEGFC,IL1RAPL1,EPHB1,EPHA7,BMP2,MME,DCC,SYNDIG1,SORL1,HES1,ASCL1,DAB1,NRP1,BRINP1,SEMA6D
GO:BP	metal ion transport	GO:0030001	0.00567405	2.24611	898	118	18	21110	TF,CNTN1,STAC,SLC1A3,CDH23,HECW2,PPP3CC,STK39,ATP2B2,TRPM3,FGF13,KCNA2,KCNH8,CALM1,SLC6A1,SLC6A11,RGS7,NEDD4L
GO:BP	phototransduction	GO:0007602	0.00616489	2.21007	50	510	9	21110	RGR,RRH,RCVRN,PDC,RP1,AIPL1,GNGT2,GNAT1,NR2E3
GO:BP	tube morphogenesis	GO:0035239	0.00618203	2.20887	867	135	19	21110	FLT1,NFIB,SAT1,FAP,PROX1,COBL,PRKCA,SASH1,LAMA1,KDM5B,F3,EPAS1,HES5,THSD7A,HEY2,HDAC9,MEF2C,MINAR1,ID2
GO:BP	negative regulation of cellular process	GO:0048523	0.00620191	2.20747	4753	177	67	21110	WIF1,FLT1,NFIB,CADM1,FAP,RARB,VIPR2,EPHA3,GRIK2,GRID2,SRGAP1,APBB2,CHL1,PROX1,FABP7,FRMD5,GLIS3,NFIX,ST3GAL1,PRKCA,ALDH1A2,HECW2,KDM5B,PPP3CC,STK39,CGNL1,FGF13,SOX6,SEMA5B,NRG1,LIMD1,CALM1,HES5,RHPN2,SLC6A1,HEY2,DUSP16,RGS7,HDAC9,MEF2C,PCDH17,KIT,NEDD4L,NAV3,DCLK1,MINAR1,ABI3BP,CD44,RASD1,ID2,PLCB1,PAG1,L3MBTL4,NCOA7,EGR1,CPEB4,LHCGR,PDGFRA,GPD1L,RGS16,MPZ,SEMA6A,P3H2,SPOCK1,TSC22D1,CRYM,THRB
GO:BP	fat cell differentiation	GO:0045444	0.00660136	2.18037	237	891	27	21110	WIF1,WNT5B,ID2,PLCB1,PDGFRA,SFRP1,DUSP10,ARID5B,SOX13,HMGA2,GNB3,NR4A1,BMP2,CCDC3,RETREG1,NR4A3,SMAD6,HES1,FOXO1,CCND1,FGF10,GATA3,SORT1,TMEM120B,TRPV4,CREBL2,INHBB
GO:BP	embryonic organ development	GO:0048568	0.00661353	2.17957	462	162	15	21110	RARB,PROX1,COBL,ALDH1A2,CDH23,PDGFC,EPAS1,HEY2,MEF2C,KIT,ID2,MYO6,PCDH15,PCSK5,PDGFRA
GO:BP	neuroblast proliferation	GO:0007405	0.00674791	2.17083	73	346	9	21110	SOX5,PROX1,FGF13,CDON,BTG2,PTN,NEUROD4,VEGFC,ACSL6
GO:BP	macromolecule biosynthetic process	GO:0009059	0.00714248	2.14615	4824	760	227	21110	TF,NFIB,RARB,SOX5,CREB5,APBB2,PROX1,GLIS3,NFIX,ST3GAL1,GALNT13,ST8SIA5,KDM5B,UST,NFIA,LUM,SOX6,ST8SIA1,EPAS1,NRG1,LIMD1,HES5,HEY2,HDAC9,MEF2C,NR3C2,KIT,ST6GAL2,CDON,RASD1,ID2,MYO6,PLCB1,L3MBTL4,MAML2,NCOA7,EGR1,CPEB4,MTTP,TSC22D1,CRYM,THRB,FOS,TSHZ2,BTG2,MAN1C1,SETBP1,RPS4Y1,KDM4C,PID1,SFRP1,NPAS2,NFATC2,B3GLCT,CRY1,FUT8,RPS26,ARID5B,SOX13,PRKN,PRR16,BCAS3,WWOX,EGF,ATXN1,FUT10,HMGA2,MAEL,ZFY,NEUR…
GO:BP	neuron death	GO:0070997	0.0073943	2.1311	370	782	33	21110	GRIK2,GRID2,CHL1,TRIM2,MEF2C,NCOA7,EGR1,CPEB4,THRB,FOS,BTG2,PRKN,EPHB1,EPHA7,DCC,SORL1,ERBB3,APOE,SLC7A11,CBL,RETREG1,NR4A3,MAP3K5,ASCL1,NRP1,GAPDH,RACK1,CCND1,NES,GATA3,SET,BCL2L1,PPARA
GO:BP	renal system development	GO:0072001	0.00744233	2.12829	324	613	26	21110	RARB,PROX1,ALDH1A2,NFIA,HES5,PLCE1,MEF2C,PCSK5,EGR1,PDGFRA,SFRP1,MYO1E,ARID5B,CYP26A1,IFT88,EPHA7,BMP2,MME,ADAMTS6,MTSS1,ANGPT2,HS3ST3B1,SMAD6,BMPER,HES1,NRP1
GO:BP	regulation of epithelial cell proliferation	GO:0050678	0.0077386	2.11134	376	771	33	21110	FLT1,NFIB,PROX1,PRKCA,ALDH1A2,KDM5B,F3,ST8SIA1,HES5,MEF2C,SEMA5A,SFRP1,DUSP10,EGF,PTN,VEGFC,STAT3,NR4A1,BMP2,APOE,CNMD,MTSS1,NR4A3,HES1,ZEB1,NRP1,HMGB1,CCND1,BCL11B,FGF10,GATA3,NME2,SCG2
GO:BP	regulation of MAPK cascade	GO:0043408	0.00789077	2.10288	672	617	42	21110	FLT1,TNIK,RASGRP1,PRKCA,SASH1,PDGFC,STK39,NRG1,PLCE1,DUSP16,MEF2C,KIT,CDON,CD44,PLCB1,PDGFRA,SEMA6A,ROR2,SFRP1,DUSP10,PRKN,EGF,WNK2,PDE6H,KSR1,EPHB1,EPHA7,BMP2,GADD45G,SORL1,APOE,MAP2K6,GAREM1,PTPN11,MAP3K5,INHBA,TAOK3,CCN1,BMPER,FOXO1,NRP1,HMGB1
GO:BP	regulation of endothelial cell proliferation	GO:0001936	0.0079293	2.10077	140	617	16	21110	FLT1,PROX1,PRKCA,ALDH1A2,F3,MEF2C,SEMA5A,EGF,VEGFC,STAT3,NR4A1,BMP2,APOE,CNMD,NRP1,HMGB1
GO:BP	regulation of developmental growth	GO:0048638	0.008052	2.0941	323	818	31	21110	PROX1,FGF13,SEMA5B,NRG1,HEY2,MEF2C,NEDD4L,PLCB1,SEMA6A,CDH4,SEMA5A,DUSP10,PRKN,MAEL,STAT3,CAPN3,TLL2,EPHA7,DCC,APOE,ITSN2,MTM1,NRP1,SEMA6D,NACA,SEMA3A,PPARA,TSHR,NKD1,NTN1,TNR
GO:BP	positive regulation of MAPK cascade	GO:0043410	0.00952462	2.02115	483	140	14	21110	FLT1,TNIK,RASGRP1,PRKCA,SASH1,PDGFC,STK39,NRG1,PLCE1,MEF2C,KIT,CDON,CD44,PLCB1
GO:BP	cytoskeleton organization	GO:0007010	0.0095889	2.01823	1513	280	42	21110	TF,DST,TNIK,EPHA3,PROX1,FRMD5,COBL,SLAIN1,SIPA1L1,CGNL1,FGF13,LIMD1,THSD7A,RHPN2,PLCE1,ITGB5,KIT,MYO5B,NAV3,DCLK1,MYO6,PCDH15,FSIP2,ANKFN1,PDGFRA,SEMA6A,NOS1AP,RIPOR2,CCDC88C,SEMA5A,CLIP4,SFRP1,RHOJ,MYO1E,NLGN1,AFAP1,RP1,PRKN,HOOK1,BCAS3,SVIL,OPHN1
GO:BP	tissue development	GO:0009888	0.00961384	2.0171	2008	387	65	21110	NFIB,RARB,SOX5,EPHA3,PROX1,WNT5B,COBL,ALDH1A2,CDH23,LAMA1,KDM5B,DNER,NFIA,SOX6,SEMA5B,EPAS1,NRG1,HES5,HEY2,HDAC9,MEF2C,SNX10,ITGB5,CDON,KAZN,CD44,ID2,MYO6,PLCB1,PCDH15,EGR1,PDGFRA,SEMA6A,RBFOX1,THRB,FOS,ROR2,RIPOR2,BTG2,CCDC88C,SEMA5A,SFRP1,MYO1E,DUSP10,ARID5B,KIF16B,TIAM1,SVIL,EGF,PTN,OPHN1,HMGA2,PLAAT3,VEGFC,MYH14,SATB2,BFSP1,NR4A1,ALPK2,NTN4,EPHB1,TLL2,EPHA7,BMP2,CA2
GO:BP	monoatomic ion transmembrane transport	GO:0034220	0.00971073	2.01275	1030	118	19	21110	GABRG3,GRIK2,GRID2,STAC,SLC1A3,HECW2,PPP3CC,STK39,ATP2B2,TRPM3,FGF13,KCNA2,KCNH8,CALM1,SLC15A3,SLC6A1,SLC6A11,RGS7,NEDD4L
GO:BP	blood vessel morphogenesis	GO:0048514	0.0100452	1.99804	619	367	28	21110	FLT1,SAT1,FAP,PROX1,PRKCA,SASH1,LAMA1,F3,EPAS1,THSD7A,HEY2,HDAC9,MINAR1,PDGFRA,SEMA6A,SEMA5A,SFRP1,RHOJ,MYO1E,BCAS3,EGF,NRXN3,HMGA2,DDAH1,VEGFC,STAT3,NR4A1,EPHB1
GO:BP	phosphorylation	GO:0016310	0.0104933	1.97909	1787	132	28	21110	DGKB,TF,FLT1,CADM1,TNIK,EPHA3,PROX1,CNTN1,HKDC1,RASGRP1,ST3GAL1,PRKCA,SASH1,LAMA1,PDGFC,STK39,NRG1,LIMD1,CALM1,HES5,MAPK4,PLCE1,DUSP16,MEF2C,KIT,CDON,DCLK1,CD44
GO:BP	cellular response to endogenous stimulus	GO:0071495	0.0105302	1.97756	1469	613	73	21110	FLT1,RARB,SOX5,SLC1A3,PDGFC,KDM5B,NFIA,SOX6,HES5,HDAC9,MEF2C,ITGB5,NR3C2,KIT,CD44,PLCB1,EGR1,CPEB4,LHCGR,PDGFRA,SEMA6A,THRB,FOS,USP9Y,PCSK6,KDM4C,PID1,SFRP1,AQP9,CHRDL1,CRY1,FUT8,KIF16B,PRKN,BCAS3,WWOX,PDE3A,SESN1,PLPP1,IFT88,VEGFC,ABCC1,STAT3,NR4A1,BMP2,CA2,LIMS1,KDM5D,SORL1,ADAMTS12,NCOA3,TBC1D4,GAREM1,PTPN11,NR2E3,ANGPT2,CBL,NR4A3,SMAD6,INHBA,OTX2,CCN1,BRMS1L,PIK3R3,IDE,BMPER,HES1,SLC8A1,SORBS…
GO:BP	skeletal muscle organ development	GO:0060538	0.0106059	1.97445	182	373	14	21110	DNER,HDAC9,MEF2C,CDON,EGR1,RBFOX1,FOS,RIPOR2,BTG2,SVIL,MYH14,NR4A1,EPHB1,TLL2
GO:BP	postsynapse organization	GO:0099173	0.0106175	1.97398	191	514	17	21110	DGKB,GRID2,SIPA1L1,DOCK10,NOS1AP,ROR2,NLGN1,CHRDL1,NLGN4Y,OPHN1,NRXN3,IL1RAPL1,EPHB1,EPHA7,PRMT3,APOE,SLC7A11
GO:BP	embryonic digestive tract development	GO:0048566	0.0113427	1.94528	33	162	5	21110	RARB,ALDH1A2,ID2,PCSK5,PDGFRA
GO:BP	inner ear auditory receptor cell differentiation	GO:0042491	0.0116173	1.9349	48	195	6	21110	CDH23,HES5,HEY2,MYO6,PCDH15,RIPOR2
GO:BP	regulation of epithelial cell migration	GO:0010632	0.0117412	1.93029	227	738	23	21110	PROX1,SCARB1,PRKCA,SASH1,HDAC9,MEF2C,PTPRG,SEMA5A,RHOJ,DUSP10,BCAS3,EGF,PTN,VEGFC,APOE,ANGPT2,BMPER,NRP1,HMGB1,TMSB4X,DOCK5,FGF10,GATA3
GO:BP	circulatory system process	GO:0003013	0.0117902	1.92848	599	340	26	21110	NAV2,NCALD,SLC1A3,STK39,ATP2B2,FGF13,EPAS1,CALM1,SLC6A1,HEY2,NEDD4L,ID2,PCSK5,GPD1L,THRB,ARHGAP42,NOS1AP,SLC15A2,SCN1A,GRIP2,PDE3A,GNB3,DDAH1,VEGFC,ABCC1,SLC1A4
GO:BP	establishment of cell polarity	GO:0030010	0.0118346	1.92684	157	849	20	21110	LAMA1,UST,FGF13,HES5,ANKFN1,MPP7,RIPOR2,BCAS3,OPHN1,ALPK2,EPHB1,LLGL2,CYTH1,MCPH1,HES1,RACK1,FGF10,GATA3,ARHGEF11,ABL2
GO:BP	establishment or maintenance of cell polarity	GO:0007163	0.0121265	1.91626	243	792	25	21110	DST,LAMA1,UST,FGF13,HES5,ANKFN1,MPP7,LIN7A,RIPOR2,RHOJ,BCAS3,OPHN1,MTCL1,ALPK2,EPHB1,LLGL2,CYTH1,MCPH1,HES1,RACK1,ACTB,FGF10,GATA3,ARHGEF11,RHOBTB1
GO:BP	negative regulation of multicellular organismal process	GO:0051241	0.0124816	1.90373	1110	233	30	21110	NFIB,FAP,RARB,PROX1,STK39,FGF13,SOX6,SEMA5B,HES5,HEY2,HDAC9,MEF2C,NAV3,MINAR1,ABI3BP,ID2,PAG1,PDGFRA,SEMA6A,ARHGAP42,CLNK,PTPRG,RIPOR2,BTG2,NPVF,KREMEN1,SEMA5A,CARD18,SFRP1,DUSP10
GO:BP	positive regulation of signal transduction	GO:0009967	0.012636	1.89839	1538	891	101	21110	FLT1,TNIK,PROX1,RASGRP1,WNT5B,ARHGEF3,PRKCA,SASH1,LAMA1,PDGFC,PPP3CC,STK39,F3,GUCY1A2,NRG1,ZC3HAV1,HES5,PCDH11Y,PLCE1,SLC15A3,MEF2C,NR3C2,KIT,CDON,CD44,PLCB1,LHCGR,PDGFRA,THRB,NOS1AP,ROR2,SEMA5A,SFRP1,NLGN1,PRKN,WWOX,EGF,WNK2,STAT3,PDE6H,AAK1,KSR1,BMP2,PRR5L,MAOA,GPR137C,LIMS1,PLA2R1,GADD45G,SORL1,ERBB3,APOE,MAP2K6,GAREM1,PTPN11,TMOD2,CBL,CRADD,IL1R1,CSNK1G1,MAP3K5,INHBA,TAOK3,CCN1,BMPER,HES1,SOR…
GO:BP	sialylation	GO:0097503	0.0129539	1.8876	21	121	4	21110	ST3GAL1,ST8SIA5,ST8SIA1,ST6GAL2
GO:BP	positive regulation of endothelial cell migration	GO:0010595	0.0130584	1.88411	105	329	10	21110	PROX1,SCARB1,PRKCA,SASH1,HDAC9,SEMA5A,RHOJ,BCAS3,EGF,VEGFC
GO:BP	regulation of endothelial cell migration	GO:0010594	0.0131128	1.8823	167	873	21	21110	PROX1,SCARB1,PRKCA,SASH1,HDAC9,MEF2C,SEMA5A,RHOJ,BCAS3,EGF,PTN,VEGFC,APOE,ANGPT2,BMPER,NRP1,HMGB1,TMSB4X,GATA3,DCN,STARD13
GO:BP	kidney development	GO:0001822	0.0131578	1.88082	314	613	25	21110	RARB,PROX1,ALDH1A2,HES5,PLCE1,MEF2C,PCSK5,EGR1,PDGFRA,SFRP1,MYO1E,ARID5B,CYP26A1,IFT88,EPHA7,BMP2,MME,ADAMTS6,MTSS1,ANGPT2,HS3ST3B1,SMAD6,BMPER,HES1,NRP1
GO:BP	actin cytoskeleton organization	GO:0030036	0.0138059	1.85994	731	502	38	21110	TF,TNIK,EPHA3,PROX1,FRMD5,COBL,SIPA1L1,CGNL1,THSD7A,RHPN2,ITGB5,KIT,MYO5B,MYO6,PCDH15,PDGFRA,NOS1AP,SEMA5A,SFRP1,RHOJ,MYO1E,PRKN,BCAS3,SVIL,OPHN1,MYH14,ARHGAP28,CAPN3,CORO2B,CTNNA2,SHROOM4,LLGL2,FGD3,MRTFA,ARFGEF3,DIAPH2,MTSS1,TMOD2
GO:BP	striated muscle cell differentiation	GO:0051146	0.0147616	1.83087	281	782	27	21110	RARB,PROX1,DNER,SOX6,NRG1,HEY2,HDAC9,MEF2C,CDON,PDGFRA,RIPOR2,NFATC2,ATP11A,ALPK2,CAPN3,BMP2,KCNH1,TMOD2,ADAM12,SLC8A1,NACA,ACTG1,DOCK5,ADAMTS15,YBX1,SORT1,PPARA
GO:BP	epithelial cell differentiation	GO:0030855	0.0153288	1.81449	722	141	17	21110	NFIB,RARB,PROX1,WNT5B,CDH23,LAMA1,KDM5B,EPAS1,NRG1,HES5,HEY2,MEF2C,KAZN,ID2,MYO6,PLCB1,PCDH15
GO:BP	monoatomic cation transport	GO:0006812	0.0154685	1.81055	1064	118	19	21110	TF,CNTN1,STAC,SLC1A3,CDH23,HECW2,PPP3CC,STK39,ATP2B2,TRPM3,FGF13,KCNA2,KCNH8,CALM1,SLC15A3,SLC6A1,SLC6A11,RGS7,NEDD4L
GO:BP	cartilage development	GO:0051216	0.0161137	1.79281	210	132	9	21110	NFIB,RARB,SOX5,WNT5B,NFIA,SOX6,HES5,MEF2C,CD44
GO:BP	anatomical structure formation involved in morphogenesis	GO:0048646	0.0174661	1.7578	1174	128	21	21110	FLT1,NFIB,SAT1,FAP,GRID2,PROX1,CNTN1,COBL,PRKCA,SASH1,ALDH1A2,F3,EPAS1,HES5,THSD7A,HEY2,HDAC9,MEF2C,ITGB5,CDON,MINAR1
GO:BP	negative regulation of ubiquitin-protein transferase activity	GO:0051444	0.0178598	1.74812	23	719	7	21110	RPL11,RPS15,RPS7,RPL5,RPS20,RPL23,RPL37
GO:BP	regulation of neurogenesis	GO:0050767	0.0178744	1.74777	379	618	28	21110	PROX1,FGF13,SEMA5B,HES5,HEY2,KIT,CDON,ID2,SEMA6A,CDH4,BTG2,SEMA5A,DUSP10,TIAM1,PTN,VEGFC,IL1RAPL1,EPHA7,BMP2,MME,DCC,SORL1,HES1,ASCL1,DAB1,NRP1,BRINP1,SEMA6D
GO:BP	retina vasculature development in camera-type eye	GO:0061298	0.0183218	1.73703	18	613	6	21110	LAMA1,PDGFRA,RHOJ,VSTM4,ROM1,NRP1
GO:BP	positive regulation of signaling	GO:0023056	0.0187881	1.72612	1742	117	25	21110	FLT1,TNIK,GRIK2,PROX1,RASGRP1,WNT5B,ARHGEF3,PRKCA,SASH1,SLC1A3,LAMA1,PDGFC,PPP3CC,STK39,F3,GUCY1A2,NRG1,ZC3HAV1,HES5,PCDH11Y,PLCE1,SLC15A3,MEF2C,NR3C2,KIT
GO:BP	learning	GO:0007612	0.0190902	1.71919	155	284	11	21110	FGF13,SLC6A1,KIT,PLCB1,FOS,BTG2,NLGN4Y,PRKN,PTN,ATXN1,NRXN3
GO:BP	positive regulation of cell communication	GO:0010647	0.019166	1.71747	1744	117	25	21110	FLT1,TNIK,GRIK2,PROX1,RASGRP1,WNT5B,ARHGEF3,PRKCA,SASH1,SLC1A3,LAMA1,PDGFC,PPP3CC,STK39,F3,GUCY1A2,NRG1,ZC3HAV1,HES5,PCDH11Y,PLCE1,SLC15A3,MEF2C,NR3C2,KIT
GO:BP	negative regulation of developmental process	GO:0051093	0.0198534	1.70216	927	881	67	21110	NFIB,RARB,PROX1,FGF13,SOX6,SEMA5B,LIMD1,HES5,HEY2,KIT,MINAR1,ID2,SEMA6A,BTG2,KREMEN1,SEMA5A,SFRP1,NLGN1,NFATC2,DUSP10,PRKN,PTN,ABCG1,MAEL,VEGFC,STAT3,ALPK2,EPHB1,TLL2,EPHA7,BMP2,DCC,SORL1,ADAMTS12,CNMD,PTPN11,ANGPT2,SMAD6,INHBA,BRMS1L,HES1,ZEB1,ASCL1,DAB1,FOXO1,NRP1,BRINP1,HMGB1,SEMA6D,ACTB,CCND1,FGF10,SEMA3A,GATA3,TMEM131L,YBX1,SORT1,BCL2L1,PPARA,TTPA,NKD1,NTN1,TNR,PLPP7,TRPV4,DCN,CARTPT
GO:BP	positive regulation of signal transduction by p53 class mediator	GO:1901798	0.0201563	1.69559	32	719	8	21110	PLA2R1,RPL11,RPS15,RPS7,RPS20,RPL23,RPL26,RPL37
GO:BP	negative regulation of axonogenesis	GO:0050771	0.0202689	1.69317	67	818	12	21110	FGF13,SEMA5B,SEMA6A,SEMA5A,EPHA7,DCC,DAB1,NRP1,SEMA6D,SEMA3A,NTN1,TNR
GO:BP	cell surface receptor signaling pathway involved in cell-cell signaling	GO:1905114	0.0215821	1.66591	579	278	22	21110	WIF1,GABRG3,TNIK,GRIK2,GRID2,WNT5B,LIMD1,PCDH11Y,MEF2C,EGR1,ROR2,KREMEN1,SEZ6,CCDC88C,SEMA5A,SFRP1,NLGN1,SOX13,PRKN,TIAM1,WWOX,EGF
GO:BP	regulation of monoatomic ion transport	GO:0043269	0.0221265	1.65509	594	466	31	21110	TF,CNTN1,STAC,HECW2,PPP3CC,STK39,FGF13,KCNA2,KCNH8,CALM1,RGS7,NEDD4L,LHCGR,GPD1L,RCVRN,NOS1AP,BEST3,SCN1A,KCNH7,KCNIP4,DPP10,EGF,CACNA1B,WNK2,CAPN3,CA2,CABP5,SCN9A,KCNH1,TMEM74,PXK
GO:BP	digestive tract development	GO:0048565	0.0223085	1.65153	135	162	8	21110	RARB,COBL,ALDH1A2,PDGFC,KIT,ID2,PCSK5,PDGFRA
GO:BP	response to endogenous stimulus	GO:0009719	0.0227077	1.64383	1720	613	81	21110	FLT1,RARB,SOX5,QDPR,SLC1A3,PDGFC,KDM5B,STK39,NFIA,SOX6,HES5,HDAC9,MEF2C,ITGB5,NR3C2,KIT,CD44,PLCB1,EGR1,CPEB4,LHCGR,PDGFRA,SEMA6A,THRB,FOS,USP9Y,BTG2,PCSK6,KDM4C,PID1,SFRP1,AQP9,CHRDL1,CRY1,FUT8,KIF16B,PRKN,BCAS3,WWOX,PDE3A,SESN1,PLPP1,IFT88,VEGFC,ABCC1,STAT3,NR4A1,ME1,BMP2,CA2,MME,LIMS1,KDM5D,SORL1,ADAMTS12,APOE,NCOA3,TBC1D4,GAREM1,PTPN11,NR2E3,ANGPT2,CBL,NR4A3,SMAD6,INHBA,OTX2,CCN1,BRMS1L,PIK3R…
GO:BP	positive regulation of catalytic activity	GO:0043085	0.0229602	1.63903	1116	192	26	21110	FLT1,VIPR2,EPHA3,PROX1,RASGRP1,SCARB1,SASH1,PDGFC,SIPA1L1,SERINC5,F3,NRG1,RASGEF1B,CALM1,RGS7,MEF2C,KIT,CD44,DOCK10,EGR1,LHCGR,PDGFRA,RGS16,ARHGAP42,NOS1AP,ROR2
GO:BP	positive regulation of cell differentiation	GO:0045597	0.0241781	1.61658	849	617	48	21110	WIF1,SOX5,PROX1,RASGRP1,PRKCA,LAMA1,SOX6,NRG1,MEF2C,KIT,CDON,ABI3BP,ID2,PLCB1,FOS,CDH4,ROR2,RIPOR2,SEMA5A,SFRP1,DUSP10,SOX13,TIAM1,PTN,PDE3A,NEUROD4,VEGFC,STAT3,ATP11A,IL1RAPL1,BMP2,RPS6KA3,MME,PCP4,NCOA3,CCDC3,MAP3K5,INHBA,CCN1,IL15,TENT5A,HES1,ZEB1,ASCL1,DAB1,NRP1,BRINP1,HMGB1
GO:BP	regulation of G protein-coupled receptor signaling pathway	GO:0008277	0.0252253	1.59816	138	609	15	21110	PRKCA,PLCE1,RGS7,PLCB1,GNG7,RGS16,FRMPD1,CRY1,PDC,AIPL1,PDE6H,GNAT1,TMOD2,CRTC3,KCTD8
GO:BP	actin filament-based movement	GO:0030048	0.0258871	1.58692	129	228	9	21110	FGF13,NEDD4L,MYO5B,MYO6,GPD1L,NOS1AP,CCDC88C,SCN1A,MYO1E
GO:BP	dipeptide transmembrane transport	GO:0035442	0.0260702	1.58386	7	514	4	21110	SLC15A3,SLC15A2,CA2,SLC7A11
GO:BP	dipeptide transport	GO:0042938	0.0260702	1.58386	7	514	4	21110	SLC15A3,SLC15A2,CA2,SLC7A11
GO:BP	response to external stimulus	GO:0009605	0.0273333	1.56331	2900	66	23	21110	DGKB,TF,FLT1,NFIB,CADM1,FAP,EPHA3,GRIK2,GRID2,CHL1,PROX1,CNTN1,RASGRP1,SCARB1,PRKCA,SASH1,SLC1A3,ALDH1A2,LAMA1,RGR,STK39,SERINC5,F3
GO:BP	organic substance biosynthetic process	GO:1901576	0.0275834	1.55935	5894	760	265	21110	DGKB,TF,NFIB,SAT1,RARB,SOX5,CREB5,APBB2,PROX1,GLIS3,NFIX,ST3GAL1,GALNT13,ST8SIA5,SCARB1,PCYT1B,QDPR,SLC1A3,ALDH1A2,KDM5B,SERINC5,UST,GUCY1A2,NFIA,LUM,SOX6,ST8SIA1,EPAS1,NRG1,LIMD1,HES5,PLCE1,HEY2,HDAC9,MEF2C,NR3C2,KIT,ST6GAL2,CDON,RASD1,ID2,MYO6,PLCB1,L3MBTL4,MAML2,PCSK5,NCOA7,EGR1,CPEB4,LHCGR,MTTP,SPTLC3,TSC22D1,CRYM,THRB,FOS,TSHZ2,BTG2,MAN1C1,SETBP1,RPS4Y1,KDM4C,PID1,SFRP1,NPAS2,NFATC2,B3GLCT,C…
GO:BP	cognition	GO:0050890	0.029441	1.53105	319	514	22	21110	CHL1,FGF13,SLC6A1,MEF2C,KIT,PLCB1,LHCGR,FOS,BTG2,NLGN4Y,PRKN,PTN,ATXN1,NRXN3,SLC1A4,MME,SHROOM4,ATP8A1,APOE,BTBD9,TMOD2,SLC7A11
GO:BP	positive regulation of protein serine/threonine kinase activity	GO:0071902	0.0301268	1.52105	195	117	8	21110	FLT1,PROX1,RASGRP1,SASH1,PDGFC,CALM1,MEF2C,KIT
GO:BP	locomotory behavior	GO:0007626	0.0314439	1.50246	211	262	12	21110	NAV2,CHL1,CNTN1,CDH23,ID2,PCDH15,ANKFN1,GNG7,EGR1,SEZ6,SCN1A,PRKN
GO:BP	hair cell differentiation	GO:0035315	0.0320648	1.49397	57	195	6	21110	CDH23,HES5,HEY2,MYO6,PCDH15,RIPOR2
GO:BP	regulation of localization	GO:0032879	0.0322614	1.49132	2115	617	95	21110	TF,EPHA3,CNTN1,STAC,SCARB1,HECW2,KDM5B,PPP3CC,STK39,FGF13,KCNA2,KCNH8,NRG1,CALM1,SLC6A1,RGS7,MEF2C,PCDH17,NEDD4L,DCLK1,MYO6,PLCB1,SV2B,LHCGR,GPD1L,RCVRN,NOS1AP,RIPOR2,NPVF,BEST3,PID1,SFRP1,SCN1A,NLGN1,KCNH7,TTC39B,CRY1,PRKN,KCNIP4,BCAS3,DPP10,EGF,OPHN1,ABCG1,MTCL1,CACNA1B,WNK2,G6PC2,VEGFC,SNCAIP,AAK1,CPLX1,CAPN3,IL1RAPL1,CORO2B,BMP2,CA2,PRR5L,CRYAB,LLGL2,PLA2R1,CABP5,SCN9A,KCNH1,TMEM74,SORL1,ATP8…
GO:BP	inorganic ion transmembrane transport	GO:0098660	0.0330935	1.48026	922	118	17	21110	GABRG3,STAC,SLC1A3,HECW2,PPP3CC,STK39,ATP2B2,TRPM3,FGF13,KCNA2,KCNH8,CALM1,SLC15A3,SLC6A1,SLC6A11,RGS7,NEDD4L
GO:BP	inorganic cation transmembrane transport	GO:0098662	0.034168	1.46638	828	118	16	21110	STAC,SLC1A3,HECW2,PPP3CC,STK39,ATP2B2,TRPM3,FGF13,KCNA2,KCNH8,CALM1,SLC15A3,SLC6A1,SLC6A11,RGS7,NEDD4L
GO:BP	transmembrane transport	GO:0055085	0.0341772	1.46626	1558	118	23	21110	GABRG3,SLC35F1,GRIK2,GRID2,STAC,SCARB1,SLC1A3,HECW2,PPP3CC,STK39,ATP2B2,TRPM3,FGF13,KCNA2,KCNH8,CALM1,SLC35D1,SLC15A3,SLC6A1,SLC6A11,RGS7,MEF2C,NEDD4L
GO:BP	skeletal muscle cell differentiation	GO:0035914	0.0345237	1.46188	72	430	9	21110	MEF2C,CDON,EGR1,RBFOX1,FOS,BTG2,NR4A1,EPHB1,MEGF10
GO:BP	chemotaxis	GO:0006935	0.0352326	1.45306	631	818	47	21110	FLT1,NFIB,EPHA3,CHL1,CNTN1,LAMA1,STK39,F3,SEMA5B,NRG1,KIT,PDGFRA,SEMA6A,CDH4,RIPOR2,SEMA5A,PTN,OPHN1,NRXN3,NFASC,CRPPA,VEGFC,ABCC1,NR4A1,EPHB1,EPHA7,DCC,ANGPT2,OTX2,CCN1,NRP1,UNC5D,HMGB1,SEMA6D,RPL13A,MIF,TMSB4X,RPS19,BCL11B,FGF10,SEMA3A,GATA3,SCG2,LRTM1,PADI2,NTN1,TNR
GO:BP	gamma-aminobutyric acid reuptake	GO:0051936	0.0352691	1.45261	4	334	3	21110	SLC6A1,SLC6A11,SLC6A12
GO:BP	cellular response to growth factor stimulus	GO:0071363	0.0356649	1.44776	680	627	41	21110	FLT1,SOX5,KDM5B,NFIA,SOX6,HES5,MEF2C,ITGB5,CD44,EGR1,PDGFRA,SEMA6A,FOS,USP9Y,PCSK6,SFRP1,CHRDL1,FUT8,KIF16B,WWOX,PDE3A,VEGFC,STAT3,NR4A1,BMP2,LIMS1,SORL1,ADAMTS12,GAREM1,PTPN11,ANGPT2,CBL,SMAD6,OTX2,CCN1,BRMS1L,BMPER,HES1,ZEB1,NRP1,EEF1A1
GO:BP	regulation of cardiocyte differentiation	GO:1905207	0.0357079	1.44724	25	130	4	21110	SOX6,HEY2,MEF2C,ABI3BP
GO:BP	regulation of transferase activity	GO:0051338	0.0357367	1.44689	860	726	54	21110	FLT1,EPHA3,PROX1,RASGRP1,SASH1,PDGFC,SERINC5,NRG1,CALM1,PLCE1,DUSP16,MEF2C,KIT,CD44,EGR1,PDGFRA,ROR2,SFRP1,DUSP10,PRKN,EGF,HMGA2,VEGFC,KSR1,EPHB1,EPHA7,BMP2,CCNJL,MCPH1,SORL1,ERBB3,APOE,MAP2K6,CBL,MAP3K5,TAOK3,CCN1,PIK3R3,SLC8A1,DAB1,EEF1A1,RPL11,RPS15,RPS7,RPL5,RACK1,MIF,RPS3,ACTB,RPS20,RPL23,CCND1,RPL37,RPS2
GO:BP	cardiocyte differentiation	GO:0035051	0.0357484	1.44674	144	162	8	21110	RARB,PROX1,SOX6,NRG1,HEY2,MEF2C,ABI3BP,PDGFRA
GO:BP	negative regulation of cell differentiation	GO:0045596	0.0358468	1.44555	679	851	51	21110	RARB,PROX1,FGF13,SOX6,SEMA5B,LIMD1,HES5,HEY2,ID2,SEMA6A,BTG2,SEMA5A,SFRP1,NFATC2,DUSP10,PTN,ABCG1,VEGFC,STAT3,EPHB1,EPHA7,BMP2,DCC,SORL1,ADAMTS12,PTPN11,SMAD6,INHBA,HES1,ZEB1,ASCL1,DAB1,FOXO1,NRP1,BRINP1,HMGB1,SEMA6D,ACTB,CCND1,FGF10,SEMA3A,GATA3,TMEM131L,YBX1,SORT1,PPARA,TTPA,NTN1,TNR,PLPP7,TRPV4
GO:BP	regulation of synaptic vesicle recycling	GO:1903421	0.0365303	1.43735	26	699	7	21110	PPP3CC,NLGN1,PRKN,OPHN1,BTBD9,ACTB,ACTG1
GO:BP	biosynthetic process	GO:0009058	0.0374417	1.42664	5969	760	267	21110	DGKB,TF,NFIB,SAT1,RARB,SOX5,CREB5,APBB2,PROX1,GLIS3,NFIX,ST3GAL1,GALNT13,ST8SIA5,SCARB1,PCYT1B,QDPR,SLC1A3,ALDH1A2,KDM5B,SERINC5,UST,GUCY1A2,NFIA,LUM,SOX6,ST8SIA1,EPAS1,NRG1,LIMD1,HES5,PLCE1,HEY2,HDAC9,MEF2C,NR3C2,KIT,ST6GAL2,CDON,RASD1,ID2,MYO6,PLCB1,L3MBTL4,MAML2,PCSK5,NCOA7,EGR1,CPEB4,LHCGR,MTTP,SPTLC3,TSC22D1,CRYM,THRB,FOS,TSHZ2,NOS1AP,BTG2,MAN1C1,SETBP1,RPS4Y1,KDM4C,PID1,SFRP1,NPAS2,NFATC2,B…
GO:BP	taxis	GO:0042330	0.0381925	1.41802	633	818	47	21110	FLT1,NFIB,EPHA3,CHL1,CNTN1,LAMA1,STK39,F3,SEMA5B,NRG1,KIT,PDGFRA,SEMA6A,CDH4,RIPOR2,SEMA5A,PTN,OPHN1,NRXN3,NFASC,CRPPA,VEGFC,ABCC1,NR4A1,EPHB1,EPHA7,DCC,ANGPT2,OTX2,CCN1,NRP1,UNC5D,HMGB1,SEMA6D,RPL13A,MIF,TMSB4X,RPS19,BCL11B,FGF10,SEMA3A,GATA3,SCG2,LRTM1,PADI2,NTN1,TNR
GO:BP	animal organ morphogenesis	GO:0009887	0.0395318	1.40305	1076	386	40	21110	NFIB,RARB,SOX5,PROX1,ALDH1A2,CDH23,LAMA1,PDGFC,KDM5B,SOX6,NRG1,HES5,HEY2,MEF2C,SNX10,CDON,ID2,MYO6,PCDH15,PDGFRA,SEMA6A,THRB,ROR2,RIPOR2,SFRP1,FREM1,RP1,ARID5B,TIAM1,WWOX,PTN,NRL,VEGFC,STAT3,SATB2,ALPK2,NTN4,EPHB1,CTNNA2,BMP2
GO:BP	digestive system development	GO:0055123	0.0415197	1.38175	147	162	8	21110	RARB,COBL,ALDH1A2,PDGFC,KIT,ID2,PCSK5,PDGFRA
GO:BP	regulation of axonogenesis	GO:0050770	0.0431776	1.36474	159	839	19	21110	LRRC4C,SIPA1L1,UST,FGF13,SEMA5B,SEMA6A,CDH4,SEMA5A,TIAM1,EPHA7,DCC,KIF13B,DAB1,NRP1,SEMA6D,SEMA3A,NTN1,TNR,PAK3
GO:BP	response to growth factor	GO:0070848	0.0441281	1.35529	710	627	42	21110	FLT1,SOX5,KDM5B,NFIA,SOX6,HES5,MEF2C,ITGB5,CD44,EGR1,PDGFRA,SEMA6A,FOS,USP9Y,PCSK6,SFRP1,CHRDL1,FUT8,KIF16B,WWOX,PDE3A,VEGFC,STAT3,NR4A1,BMP2,LIMS1,SORL1,ADAMTS12,GAREM1,PTPN11,ANGPT2,CBL,SMAD6,OTX2,CCN1,BRMS1L,BMPER,HES1,ZEB1,ASCL1,NRP1,EEF1A1
GO:BP	regulation of catalytic activity	GO:0050790	0.045354	1.34338	1840	732	97	21110	FLT1,VIPR2,EPHA3,PROX1,RASGRP1,SCARB1,SASH1,PDGFC,SIPA1L1,SERINC5,F3,NRG1,RASGEF1B,CALM1,PLCE1,DUSP16,RGS7,HDAC9,MEF2C,KIT,CD44,DOCK10,PCSK5,GNG7,EGR1,LHCGR,PDGFRA,RGS16,SPOCK1,ARHGAP42,NOS1AP,ROR2,RIPOR2,PCSK6,CARD18,SFRP1,DUSP10,PRKN,BCAS3,TIAM1,EGF,PDE3A,HMGA2,DDAH1,VEGFC,STAT3,NR4A1,KSR1,CAPN3,EPHB1,EPHA7,BMP2,RPS6KA3,CRYAB,LIMS1,PLA2R1,FGD3,GNAT1,CCNJL,MCPH1,SORL1,ERBB3,APOE,TBC1D4,MAP2K6,CB…
GO:BP	regulation of metal ion transport	GO:0010959	0.0462861	1.33455	407	190	14	21110	TF,CNTN1,STAC,HECW2,PPP3CC,STK39,FGF13,CALM1,RGS7,NEDD4L,LHCGR,GPD1L,RCVRN,NOS1AP
GO:BP	angiogenesis	GO:0001525	0.048146	1.31744	530	367	24	21110	FLT1,SAT1,FAP,PRKCA,SASH1,F3,EPAS1,THSD7A,HDAC9,MINAR1,PDGFRA,SEMA6A,SEMA5A,SFRP1,RHOJ,BCAS3,EGF,NRXN3,HMGA2,DDAH1,VEGFC,STAT3,NR4A1,EPHB1
GO:CC	cytosolic ribosome	GO:0022626	1.04761e-96	95.9798	104	748	81	22122	RPS4Y1,RPS26,RPL7,RPL10,RPS16,RPS11,RPL7A,RPL19,RPL13A,RPS3A,RPL3,RPS27A,RPLP0,RPL15,RPL11,RPLP1,RPL27A,RPS13,RPS10,RPL28,RPL18A,RPS15,RPS9,RPS28,RPL18,RPL24,FAU,RPL6,RPL10A,RPL29,RPS7,RPL5,RPS18,RPS14,RPL30,RPL9,RPL13,RPL8,RACK1,RPS5,RPSA,RPS24,RPL32,RPS25,RPS6,RPL41,RPS27,RPL17,RPS23,RPL4,RPS3,RPL22,RPLP2,RPS20,RPL37A,RPS19,UBA52,RPL14,RPL35,RPS8,RPS12,RPL12,RPL23,RPS15A,RPL36,RPL26,RPL27,RPS29…
GO:CC	ribosomal subunit	GO:0044391	1.01264e-64	63.9945	194	748	81	22122	RPS4Y1,RPS26,RPL7,RPL10,RPS16,RPS11,RPL7A,RPL19,RPL13A,RPS3A,RPL3,RPS27A,RPLP0,RPL15,RPL11,RPLP1,RPL27A,RPS13,RPS10,RPL28,RPL18A,RPS15,RPS9,RPS28,RPL18,RPL24,FAU,RPL6,RPL10A,RPL29,RPS7,RPL5,RPS18,RPS14,RPL30,RPL9,RPL13,RPL8,RACK1,RPS5,RPSA,RPS24,RPL32,RPS25,RPS6,RPL41,RPS27,RPL17,RPS23,RPL4,RPS3,RPL22,RPLP2,RPS20,RPL37A,RPS19,UBA52,RPL14,RPL35,RPS8,RPS12,RPL12,RPL23,RPS15A,RPL36,RPL26,RPL27,RPS29…
GO:CC	cytosolic large ribosomal subunit	GO:0022625	6.91287e-59	58.1603	56	724	47	22122	RPL7,RPL10,RPL7A,RPL19,RPL13A,RPL3,RPLP0,RPL15,RPL11,RPLP1,RPL27A,RPL28,RPL18A,RPL18,RPL24,RPL6,RPL10A,RPL29,RPL5,RPL30,RPL9,RPL13,RPL8,RPL32,RPL41,RPL17,RPL4,RPL22,RPLP2,RPL37A,UBA52,RPL14,RPL35,RPL12,RPL23,RPL36,RPL26,RPL27,RPL35A,RPL38,RPL23A,RPL36A,RPL21,RPL34,RPL31,RPL37,RPL39
GO:CC	cytosolic small ribosomal subunit	GO:0022627	1.77984e-39	38.7496	47	748	35	22122	RPS4Y1,RPS26,RPS16,RPS11,RPS3A,RPS27A,RPS13,RPS10,RPS15,RPS9,RPS28,FAU,RPS7,RPS18,RPS14,RACK1,RPS5,RPSA,RPS24,RPS25,RPS6,RPS27,RPS23,RPS3,RPS20,RPS19,UBA52,RPS8,RPS12,RPS15A,RPS29,RPS4X,RPS17,RPS2,RPS21
GO:CC	large ribosomal subunit	GO:0015934	1.81649e-36	35.7408	117	724	47	22122	RPL7,RPL10,RPL7A,RPL19,RPL13A,RPL3,RPLP0,RPL15,RPL11,RPLP1,RPL27A,RPL28,RPL18A,RPL18,RPL24,RPL6,RPL10A,RPL29,RPL5,RPL30,RPL9,RPL13,RPL8,RPL32,RPL41,RPL17,RPL4,RPL22,RPLP2,RPL37A,UBA52,RPL14,RPL35,RPL12,RPL23,RPL36,RPL26,RPL27,RPL35A,RPL38,RPL23A,RPL36A,RPL21,RPL34,RPL31,RPL37,RPL39
GO:CC	ribosome	GO:0005840	1.82662e-30	29.7384	519	726	82	22122	RPS4Y1,RPS26,RPS6KA3,RPL7,RPL10,RPS16,RPS11,RPL7A,RPL19,RPL13A,RPS3A,RPL3,RPS27A,RPLP0,RPL15,RPL11,RPLP1,RPL27A,RPS13,RPS10,RPL28,RPL18A,RPS15,RPS9,RPS28,RPL18,RPL24,FAU,RPL6,RPL10A,BTF3,RPL29,RPS7,RPL5,RPS18,RPS14,RPL30,RPL9,RPL13,RPL8,RACK1,RPS5,RPSA,RPS24,RPL32,RPS25,RPS6,RPL41,RPS27,RPL17,RPS23,RPL4,RPS3,RPL22,RPLP2,RPS20,RPL37A,RPS19,UBA52,RPL14,RPL35,RPS8,RPS12,RPL12,RPL23,RPS15A,RPL36,RPL2…
GO:CC	cell junction	GO:0030054	1.67498e-28	27.776	2230	717	178	22122	DGKB,FLT1,GABRG3,CADM1,DST,LRRC4C,FAP,TNIK,GRIK2,GRID2,APBB2,CNTN1,FRMD5,SLC1A3,CDH23,LAMA1,PPP3CC,SIPA1L1,ATP2B2,CGNL1,NFIA,FGF13,KCNA2,NRG1,LIMD1,SLC6A1,SLC6A11,MEF2C,ITGB5,PCDH17,KIT,DCLK1,KAZN,CD44,PLCB1,PCDH15,DOCK10,SV2B,CPEB4,PDGFRA,MPZ,MPP7,LIN7A,SPOCK1,PALMD,NOS1AP,ROR2,SEZ6,CCDC88C,SCN1A,MYO1E,NLGN1,CHRDL1,AFAP1,RIMBP2,RPS26,NLGN4Y,GRIP2,PRKN,TIAM1,SVIL,PTN,OPHN1,ARHGAP31,NRXN3,NFASC,CA…
GO:CC	small ribosomal subunit	GO:0015935	6.88209e-28	27.1623	80	748	35	22122	RPS4Y1,RPS26,RPS16,RPS11,RPS3A,RPS27A,RPS13,RPS10,RPS15,RPS9,RPS28,FAU,RPS7,RPS18,RPS14,RACK1,RPS5,RPSA,RPS24,RPS25,RPS6,RPS27,RPS23,RPS3,RPS20,RPS19,UBA52,RPS8,RPS12,RPS15A,RPS29,RPS4X,RPS17,RPS2,RPS21
GO:CC	polysomal ribosome	GO:0042788	7.38598e-25	24.1316	32	748	23	22122	RPS26,RPL7A,RPL19,RPL11,RPL18A,RPS28,RPL18,RPL24,RPL6,RPL10A,BTF3,RPL30,RPL8,RPL32,RPL41,RPS23,RPL36,RPS29,RPL38,RPL36A,RPL31,RPL39,RPS21
GO:CC	synapse	GO:0045202	1.0791e-23	22.9669	1465	848	144	22122	DGKB,GABRG3,CADM1,LRRC4C,TNIK,GRIK2,GRID2,APBB2,CNTN1,SLC1A3,CDH23,PPP3CC,SIPA1L1,ATP2B2,KCNA2,NRG1,SLC6A1,SLC6A11,MEF2C,PCDH17,DCLK1,PLCB1,PCDH15,DOCK10,SV2B,CPEB4,MPZ,LIN7A,SPOCK1,PALMD,NOS1AP,ROR2,SEZ6,NLGN1,CHRDL1,RIMBP2,RPS26,NLGN4Y,GRIP2,PRKN,TIAM1,PTN,OPHN1,NRXN3,CACNA1B,ITSN1,SLC6A12,SNCAIP,SLC1A4,AAK1,NR4A1,GRIK1,CPLX1,IL1RAPL1,SNTB1,EPHB1,CTTNBP2,CADM2,EPHA7,GRIA4,RPS6KA3,MME,CRYAB,DCC,…
GO:CC	focal adhesion	GO:0005925	3.59841e-22	21.4439	425	726	64	22122	FLT1,DST,FAP,LIMD1,ITGB5,CD44,AFAP1,SVIL,ARHGAP31,NFASC,SNTB1,CORO2B,MME,LIMS1,SHROOM4,FBLIM1,CBL,SORBS1,NHS,NRP1,RPL7,RPS16,RPS11,RPL7A,RPL19,RPL13A,RPS3A,RPL3,RPLP0,RPLP1,RPS13,RPS10,RPS15,RPS9,RPL18,RPL6,RPL10A,RPS7,RPL5,RPS18,RPS14,RPL30,RPL9,RPL8,RPS5,MARCKS,RPL4,RPS3,RPL22,RPLP2,ACTB,RPL37A,RPS19,RPS8,RPL12,RPL23,RPL27,RPS29,ACTG1,RPS4X,RPL38,RPL31,RPS17,RPS2
GO:CC	cell-substrate junction	GO:0030055	1.32775e-21	20.8769	435	726	64	22122	FLT1,DST,FAP,LIMD1,ITGB5,CD44,AFAP1,SVIL,ARHGAP31,NFASC,SNTB1,CORO2B,MME,LIMS1,SHROOM4,FBLIM1,CBL,SORBS1,NHS,NRP1,RPL7,RPS16,RPS11,RPL7A,RPL19,RPL13A,RPS3A,RPL3,RPLP0,RPLP1,RPS13,RPS10,RPS15,RPS9,RPL18,RPL6,RPL10A,RPS7,RPL5,RPS18,RPS14,RPL30,RPL9,RPL8,RPS5,MARCKS,RPL4,RPS3,RPL22,RPLP2,ACTB,RPL37A,RPS19,RPS8,RPL12,RPL23,RPL27,RPS29,ACTG1,RPS4X,RPL38,RPL31,RPS17,RPS2
GO:CC	polysome	GO:0005844	2.43591e-20	19.6133	72	748	28	22122	RPS4Y1,RPS26,RPL7A,RPL19,RPL11,RPL18A,RPS28,RPL18,RPL24,RPL6,RPL10A,BTF3,RPL30,RPL8,RPL32,RPS6,RPL41,RPS23,RPS3,RPL36,RPS29,RPS4X,EEF2,RPL38,RPL36A,RPL31,RPL39,RPS21
GO:CC	anchoring junction	GO:0070161	4.07546e-17	16.3898	902	726	87	22122	FLT1,CADM1,DST,FAP,FRMD5,LAMA1,CGNL1,FGF13,KCNA2,LIMD1,ITGB5,KIT,KAZN,CD44,MPP7,LIN7A,NOS1AP,CCDC88C,SCN1A,MYO1E,AFAP1,TIAM1,SVIL,ARHGAP31,NFASC,SNTB1,CORO2B,CTNNA2,MME,LIMS1,SHROOM4,LLGL2,CYTH1,FBLIM1,CBL,CDH18,PDZD2,SLC8A1,SORBS1,CDH20,NHS,NRP1,RPL7,RPS16,RPS11,RPL7A,RPL19,RPL13A,RPS3A,RPL3,RPLP0,RPLP1,RPS13,RPS10,RPS15,RPS9,RPL18,RPL6,RPL10A,RPS7,RPL5,RPS18,RPS14,RPL30,RPL9,RPL8,RPS5,MARCKS,RP…
GO:CC	cytosol	GO:0005829	1.10535e-13	12.9565	5453	726	276	22122	DGKB,DST,SAT1,TNIK,EPHA3,SRGAP1,PROX1,FAM110B,FABP7,RLBP1,HKDC1,RASGRP1,STAC,LSAMP,ARHGEF3,NCALD,PRKCA,QDPR,ALDH1A2,PDGFC,KDM5B,PPP3CC,STK39,SERINC5,GUCY1A2,FGF13,KIF21A,EPAS1,LIMD1,ZC3HAV1,CALM1,MAPK4,RHPN2,PLCE1,DUSP16,RGS7,MEF2C,NR3C2,NEDD4L,GLT1D1,KAZN,CD44,ID2,AHCYL2,MYO6,HEATR5A,PLCB1,UBE2D2,DOCK10,GPD1L,MTTP,P3H2,TSC22D1,CRYM,FOS,ARHGEF28,OSBPL10,USP9Y,NOS1AP,MAP3K1,BTG2,SETBP1,RPS4Y1,OSBP…
GO:CC	neuron projection	GO:0043005	5.96365e-12	11.2245	1394	447	74	22122	GABRG3,NFIB,CADM1,DST,EPHA3,GRID2,APBB2,CHL1,CNTN1,COBL,QDPR,SLC1A3,CDH23,RGR,SIPA1L1,ATP2B2,DNER,FGF13,KCNA2,KIF21A,SLC6A1,SLC6A11,RGS7,DCLK1,AHCYL2,PCDH15,DOCK10,PCSK2,SV2B,CPEB4,SEMA6A,SPOCK1,FOS,PALMD,RRH,RCVRN,ROR2,RIPOR2,SEZ6,OSBP2,SCN1A,NLGN1,PDC,RP1,GRIP2,PRKN,KCNIP4,OPHN1,NFASC,UNC80,GNB3,ITSN1,MYH14,SLC6A12,SLC1A4,PDE6H,AAK1,CPLX1,IL1RAPL1,SH2D3C,EPHB1,CTTNBP2,CADM2,EPHA7,GRIA4,CTNNA2,M…
GO:CC	postsynapse	GO:0098794	2.70512e-11	10.5678	665	717	62	22122	DGKB,GABRG3,CADM1,LRRC4C,TNIK,GRIK2,GRID2,CNTN1,SIPA1L1,ATP2B2,KCNA2,SLC6A1,SLC6A11,MEF2C,PCDH17,DCLK1,PLCB1,DOCK10,CPEB4,LIN7A,SPOCK1,PALMD,ROR2,SEZ6,NLGN1,NLGN4Y,GRIP2,PRKN,OPHN1,GRIK1,CPLX1,IL1RAPL1,CTTNBP2,EPHA7,GRIA4,CRYAB,DCC,SYNDIG1,KCNH1,KCND3,APBA1,SLC8A1,KCTD8,NRP1,RPL7,RPLP0,RPS13,RPL6,RPS18,RPS14,RPL30,RPL8,RPS25,RPS27,RPS3,ACTB,RPS19,RPL14,RPL12,ACTG1,RPL38,HIP1
GO:CC	extracellular vesicle	GO:1903561	3.14665e-09	8.50215	2133	726	128	22122	TF,TNIK,CREB5,CHL1,CNTN1,ST3GAL1,WNT5B,SCARB1,PRKCA,QDPR,PDGFC,SERINC5,ATP2B2,LUM,ITGB5,NEDD4L,MYO5B,CD44,MYO6,PLCB1,UBE2D2,ART3,DOCK10,GNG7,GPD1L,LIN7A,CRYM,SLC15A2,PTPRG,BTG2,MAN1C1,SEMA5A,SFRP1,RHOJ,MYO1E,FUT8,RPS26,EGF,UBE2G1,GNB3,PLPP1,DDAH1,ABCC1,MYH14,SLC1A4,EPHB1,KLKB1,BBOX1,GRIA4,CA2,C5ORF46,MME,PGM1,CRYAB,SLC46A3,PCBP3,TMPRSS11D,COBLL1,SORL1,ATP8A1,C19ORF18,APOE,NCOA3,CUBN,GPX3,ITSN2,RB…
GO:CC	extracellular membrane-bounded organelle	GO:0065010	3.24889e-09	8.48827	2134	726	128	22122	TF,TNIK,CREB5,CHL1,CNTN1,ST3GAL1,WNT5B,SCARB1,PRKCA,QDPR,PDGFC,SERINC5,ATP2B2,LUM,ITGB5,NEDD4L,MYO5B,CD44,MYO6,PLCB1,UBE2D2,ART3,DOCK10,GNG7,GPD1L,LIN7A,CRYM,SLC15A2,PTPRG,BTG2,MAN1C1,SEMA5A,SFRP1,RHOJ,MYO1E,FUT8,RPS26,EGF,UBE2G1,GNB3,PLPP1,DDAH1,ABCC1,MYH14,SLC1A4,EPHB1,KLKB1,BBOX1,GRIA4,CA2,C5ORF46,MME,PGM1,CRYAB,SLC46A3,PCBP3,TMPRSS11D,COBLL1,SORL1,ATP8A1,C19ORF18,APOE,NCOA3,CUBN,GPX3,ITSN2,RB…
GO:CC	extracellular organelle	GO:0043230	3.24889e-09	8.48827	2134	726	128	22122	TF,TNIK,CREB5,CHL1,CNTN1,ST3GAL1,WNT5B,SCARB1,PRKCA,QDPR,PDGFC,SERINC5,ATP2B2,LUM,ITGB5,NEDD4L,MYO5B,CD44,MYO6,PLCB1,UBE2D2,ART3,DOCK10,GNG7,GPD1L,LIN7A,CRYM,SLC15A2,PTPRG,BTG2,MAN1C1,SEMA5A,SFRP1,RHOJ,MYO1E,FUT8,RPS26,EGF,UBE2G1,GNB3,PLPP1,DDAH1,ABCC1,MYH14,SLC1A4,EPHB1,KLKB1,BBOX1,GRIA4,CA2,C5ORF46,MME,PGM1,CRYAB,SLC46A3,PCBP3,TMPRSS11D,COBLL1,SORL1,ATP8A1,C19ORF18,APOE,NCOA3,CUBN,GPX3,ITSN2,RB…
GO:CC	extracellular exosome	GO:0070062	6.38918e-09	8.19455	2109	726	126	22122	TF,TNIK,CREB5,CHL1,CNTN1,ST3GAL1,WNT5B,SCARB1,PRKCA,QDPR,PDGFC,SERINC5,ATP2B2,LUM,ITGB5,NEDD4L,MYO5B,CD44,MYO6,PLCB1,UBE2D2,ART3,DOCK10,GNG7,GPD1L,LIN7A,CRYM,SLC15A2,PTPRG,BTG2,MAN1C1,SEMA5A,SFRP1,RHOJ,MYO1E,FUT8,RPS26,EGF,UBE2G1,GNB3,PLPP1,DDAH1,ABCC1,MYH14,SLC1A4,EPHB1,KLKB1,BBOX1,CA2,C5ORF46,MME,PGM1,CRYAB,SLC46A3,PCBP3,TMPRSS11D,COBLL1,SORL1,ATP8A1,C19ORF18,APOE,NCOA3,CUBN,GPX3,ITSN2,BTD,IDE,…
GO:CC	plasma membrane bounded cell projection	GO:0120025	1.88528e-08	7.72462	2286	385	83	22122	GABRG3,NFIB,CADM1,DST,FAP,EPHA3,GRID2,APBB2,CHL1,CNTN1,COBL,QDPR,SLC1A3,CDH23,RGR,SIPA1L1,ATP2B2,DNER,FGF13,KCNA2,KIF21A,CALM1,PCDH11Y,PLCE1,SLC6A1,SLC6A11,RGS7,DCLK1,CD44,AHCYL2,MYO6,PCDH15,FSIP2,DOCK10,PCSK2,SV2B,CPEB4,PDGFRA,SEMA6A,MTTP,SPOCK1,FOS,PALMD,RRH,RCVRN,NOS1AP,ROR2,RIPOR2,SEZ6,OSBP2,SCN1A,MYO1E,NLGN1,PDC,RP1,GRIP2,PRKN,KCNIP4,WWOX,OPHN1,ARHGAP31,NFASC,UNC80,GNB3,IFT88,ITSN1,MYH14,SLC…
GO:CC	postsynaptic density	GO:0014069	2.50433e-08	7.60131	338	707	37	22122	CADM1,LRRC4C,TNIK,GRIK2,GRID2,SIPA1L1,ATP2B2,DCLK1,CPEB4,LIN7A,SPOCK1,NLGN1,NLGN4Y,GRIP2,PRKN,EPHA7,CRYAB,DCC,SYNDIG1,KCNH1,KCND3,SLC8A1,RPL7,RPLP0,RPS13,RPL6,RPS18,RPS14,RPL30,RPL8,RPS25,RPS27,RPS3,RPS19,RPL14,RPL12,RPL38
GO:CC	cell projection	GO:0042995	2.74818e-08	7.56096	2400	447	95	22122	GABRG3,NFIB,CADM1,DST,FAP,EPHA3,GRID2,APBB2,CHL1,CNTN1,COBL,QDPR,SLC1A3,CDH23,RGR,SIPA1L1,ATP2B2,DNER,FGF13,KCNA2,KIF21A,CALM1,PCDH11Y,THSD7A,PLCE1,SLC6A1,SLC6A11,RGS7,DCLK1,CD44,AHCYL2,MYO6,PCDH15,FSIP2,DOCK10,PCSK2,SV2B,CPEB4,PDGFRA,SEMA6A,MTTP,SPOCK1,FOS,PALMD,RRH,RCVRN,NOS1AP,ROR2,RIPOR2,SEZ6,OSBP2,SCN1A,MYO1E,NLGN1,PDC,RP1,GRIP2,PRKN,KCNIP4,WWOX,SVIL,OPHN1,ARHGAP31,NFASC,UNC80,GNB3,IFT88,ITS…
GO:CC	asymmetric synapse	GO:0032279	3.70582e-08	7.43112	352	859	42	22122	CADM1,LRRC4C,TNIK,GRIK2,GRID2,SIPA1L1,ATP2B2,DCLK1,CPEB4,LIN7A,SPOCK1,NLGN1,NLGN4Y,GRIP2,PRKN,EPHA7,CRYAB,DCC,SYNDIG1,KCNH1,KCND3,SLC8A1,RPL7,RPLP0,RPS13,RPL6,RPS18,RPS14,RPL30,RPL8,RPS25,RPS27,RPS3,RPS19,RPL14,RPL12,RPL38,SORT1,GRID2IP,GRIN2A,PAK3,GRM7
GO:CC	neuron to neuron synapse	GO:0098984	1.54584e-07	6.81083	383	859	43	22122	CADM1,LRRC4C,TNIK,GRIK2,GRID2,SIPA1L1,ATP2B2,DCLK1,CPEB4,LIN7A,SPOCK1,NLGN1,NLGN4Y,GRIP2,PRKN,EPHA7,CRYAB,DCC,SYNDIG1,KCNH1,KCND3,RAPGEF4,SLC8A1,RPL7,RPLP0,RPS13,RPL6,RPS18,RPS14,RPL30,RPL8,RPS25,RPS27,RPS3,RPS19,RPL14,RPL12,RPL38,SORT1,GRID2IP,GRIN2A,PAK3,GRM7
GO:CC	postsynaptic specialization	GO:0099572	1.91198e-07	6.71852	363	707	37	22122	CADM1,LRRC4C,TNIK,GRIK2,GRID2,SIPA1L1,ATP2B2,DCLK1,CPEB4,LIN7A,SPOCK1,NLGN1,NLGN4Y,GRIP2,PRKN,EPHA7,CRYAB,DCC,SYNDIG1,KCNH1,KCND3,SLC8A1,RPL7,RPLP0,RPS13,RPL6,RPS18,RPS14,RPL30,RPL8,RPS25,RPS27,RPS3,RPS19,RPL14,RPL12,RPL38
GO:CC	somatodendritic compartment	GO:0036477	1.58997e-06	5.79861	867	471	47	22122	GABRG3,CADM1,GRIK2,GRID2,CHL1,COBL,SLC1A3,SIPA1L1,ATP2B2,DNER,FGF13,KCNA2,KIF21A,SLC6A1,DOCK10,PCSK2,CPEB4,PALMD,RCVRN,ROR2,KREMEN1,SEZ6,OSBP2,SCN1A,NLGN1,GRIP2,KCNIP4,OPHN1,NFASC,GNB3,CACNA1B,SNCAIP,SLC1A4,CPLX1,IL1RAPL1,EPHB1,CTTNBP2,CADM2,EPHA7,GRIA4,MME,CRYAB,GNAT1,SYNDIG1,KCNH1,SORL1,APOE
GO:CC	cell periphery	GO:0071944	2.52862e-06	5.59712	6303	618	241	22122	DGKB,TF,FLT1,GABRG3,NAV2,CADM1,DST,LRRC4C,FAP,VIPR2,TNIK,EPHA3,GRIK2,GRID2,CHL1,CNTN1,RASGRP1,STAC,LSAMP,WNT5B,COBL,SCARB1,PRKCA,SLC1A3,CDH23,LAMA1,PDGFC,RGR,STK39,SIPA1L1,SERINC5,F3,ATP2B2,TRPM3,PTH2R,DNER,FGF13,KCNA2,LUM,KCNH8,KIF21A,NRG1,RASGEF1B,LIMD1,CALM1,PCDH11Y,THSD7A,RHPN2,PLCE1,SLC6A1,SLC6A11,RGS7,ITGB5,PCDH17,KIT,NEDD4L,MYO5B,CDON,DCLK1,MINAR1,KAZN,ABI3BP,CD44,RASD1,MYO6,PCDH15,PAG1,AR…
GO:CC	extracellular region	GO:0005576	2.60867e-06	5.58358	4236	734	203	22122	WIF1,TF,FLT1,LRRC4C,FAP,TNIK,CREB5,EPHA3,CHL1,CNTN1,PRSS35,LSAMP,ST3GAL1,WNT5B,SCARB1,PRKCA,QDPR,LAMA1,PDGFC,SERINC5,F3,ATP2B2,FGF13,LUM,NRG1,CALM1,CPA6,THSD7A,ITGB5,KIT,NEDD4L,GLT1D1,MYO5B,FSTL5,ABI3BP,CD44,MYO6,PLCB1,PCDH15,UBE2D2,ART3,DOCK10,PCSK2,PCSK5,GNG7,LHCGR,GPD1L,SEMA6A,LIN7A,SPOCK1,CRYM,NELL2,SLC15A2,PTPRG,BTG2,NPVF,PCSK6,MAN1C1,SEMA5A,EVA1C,SFRP1,RHOJ,ZPLD1,MYO1E,NLGN1,CHRDL1,FUT8,FRE…
GO:CC	membrane	GO:0016020	3.10538e-06	5.50789	9878	730	401	22122	DGKB,TF,FLT1,GABRG3,CADM1,DST,LRRC4C,SLC35F1,FAP,VIPR2,TNIK,EPHA3,GRIK2,GRID2,APBB2,CHL1,CNTN1,FRMD5,HKDC1,RASGRP1,STAC,LSAMP,ST3GAL1,GALNT13,WNT5B,COBL,NCALD,ST8SIA5,SCARB1,PRKCA,PCYT1B,SLC1A3,SEL1L3,CDH23,LAMA1,PDGFC,RGR,STK39,SIPA1L1,SERINC5,F3,ATP2B2,UST,TRPM3,PTH2R,RHBDL3,DNER,FGF13,KCNA2,KCNH8,ST8SIA1,KIF21A,SEMA5B,NRG1,RASGEF1B,LIMD1,CALM1,SLC35D1,PCDH11Y,THSD7A,RHPN2,PLCE1,SLC15A3,SLC6A1,…
GO:CC	plasma membrane	GO:0005886	8.09517e-06	5.09177	5819	387	151	22122	DGKB,TF,FLT1,GABRG3,CADM1,DST,LRRC4C,FAP,VIPR2,TNIK,EPHA3,GRIK2,GRID2,CHL1,CNTN1,RASGRP1,STAC,LSAMP,WNT5B,COBL,SCARB1,PRKCA,SLC1A3,CDH23,PDGFC,RGR,STK39,SIPA1L1,SERINC5,F3,ATP2B2,TRPM3,PTH2R,DNER,FGF13,KCNA2,KCNH8,KIF21A,NRG1,RASGEF1B,LIMD1,CALM1,PCDH11Y,THSD7A,RHPN2,PLCE1,SLC6A1,SLC6A11,RGS7,ITGB5,PCDH17,KIT,NEDD4L,CDON,DCLK1,MINAR1,KAZN,CD44,RASD1,MYO6,PCDH15,PAG1,ART3,SV2B,RFTN2,GNG7,LHCGR,PDG…
GO:CC	plasma membrane region	GO:0098590	2.00441e-05	4.69801	1292	613	70	22122	DGKB,TF,GABRG3,CADM1,DST,LRRC4C,FAP,TNIK,GRIK2,GRID2,CNTN1,SCARB1,SLC1A3,STK39,ATP2B2,KCNA2,NRG1,SLC6A1,SLC6A11,PCDH17,CD44,MYO6,MPZ,MTTP,LIN7A,NOS1AP,SLC15A2,RIPOR2,NLGN1,AQP9,NLGN4Y,GRIP2,SVIL,MTCL1,PLPP1,ITSN1,ABCC1,SNCAIP,PDE6H,AAK1,GRIK1,KSR1,ALPK2,IL1RAPL1,SH2D3C,EPHA7,GRIA4,CRYAB,ROM1,DCC,SHROOM4,GNAT1,SYNDIG1,KCNH1,ADAM23,ERBB3,SLC7A11,CBL,CUBN,KCND3,APBA1,ITSN2,CNNM2,SLC2A9,IDE,SLC8A1,SO…
GO:CC	extracellular space	GO:0005615	2.22193e-05	4.65327	3384	734	166	22122	TF,FLT1,LRRC4C,FAP,TNIK,CREB5,CHL1,CNTN1,ST3GAL1,WNT5B,SCARB1,PRKCA,QDPR,LAMA1,PDGFC,SERINC5,F3,ATP2B2,LUM,NRG1,CPA6,ITGB5,KIT,NEDD4L,MYO5B,ABI3BP,CD44,MYO6,PLCB1,PCDH15,UBE2D2,ART3,DOCK10,PCSK2,PCSK5,GNG7,LHCGR,GPD1L,SEMA6A,LIN7A,SPOCK1,CRYM,SLC15A2,PTPRG,BTG2,PCSK6,MAN1C1,SEMA5A,SFRP1,RHOJ,ZPLD1,MYO1E,FUT8,RPS26,LRRN3,EGF,PTN,UBE2G1,MTCL1,GNB3,PLPP1,DDAH1,VEGFC,ABCC1,MYH14,SLC1A4,EPHB1,KLKB1,TL…
GO:CC	vesicle	GO:0031982	2.44855e-05	4.61109	3998	811	206	22122	TF,FLT1,DST,TNIK,CREB5,EPHA3,APBB2,CHL1,CNTN1,ST3GAL1,WNT5B,NCALD,SCARB1,PRKCA,QDPR,SLC1A3,PDGFC,SERINC5,ATP2B2,DNER,LUM,RASGEF1B,CALM1,SLC15A3,DUSP16,SNX10,ITGB5,KIT,NEDD4L,MYO5B,CD44,MYO6,HEATR5A,PLCB1,UBE2D2,ART3,DOCK10,PCSK2,SV2B,GNG7,LHCGR,GPD1L,MTTP,LIN7A,CRYM,ROR2,SLC15A2,PTPRG,BTG2,MAN1C1,SEMA5A,SFRP1,RHOJ,ZPLD1,MYO1E,FUT8,RPS26,KIF16B,PRKN,EGF,ABCG1,NFASC,UBE2G1,GNB3,PLPP1,ITSN1,DDAH1,VE…
GO:CC	postsynaptic membrane	GO:0045211	2.56794e-05	4.59042	282	447	22	22122	DGKB,GABRG3,LRRC4C,GRIK2,GRID2,CNTN1,ATP2B2,KCNA2,SLC6A1,SLC6A11,PCDH17,LIN7A,NLGN1,NLGN4Y,GRIP2,GRIK1,IL1RAPL1,EPHA7,GRIA4,DCC,SYNDIG1,KCNH1
GO:CC	dendrite	GO:0030425	2.87395e-05	4.54152	633	447	35	22122	GABRG3,CADM1,GRID2,CHL1,COBL,SIPA1L1,ATP2B2,DNER,FGF13,KCNA2,KIF21A,DOCK10,PCSK2,CPEB4,PALMD,RCVRN,ROR2,SEZ6,OSBP2,NLGN1,GRIP2,KCNIP4,OPHN1,NFASC,GNB3,SLC1A4,IL1RAPL1,EPHB1,CTTNBP2,EPHA7,GRIA4,MME,CRYAB,SYNDIG1,KCNH1
GO:CC	dendritic tree	GO:0097447	3.10198e-05	4.50836	635	447	35	22122	GABRG3,CADM1,GRID2,CHL1,COBL,SIPA1L1,ATP2B2,DNER,FGF13,KCNA2,KIF21A,DOCK10,PCSK2,CPEB4,PALMD,RCVRN,ROR2,SEZ6,OSBP2,NLGN1,GRIP2,KCNIP4,OPHN1,NFASC,GNB3,SLC1A4,IL1RAPL1,EPHB1,CTTNBP2,EPHA7,GRIA4,MME,CRYAB,SYNDIG1,KCNH1
GO:CC	cell body	GO:0044297	0.000169708	3.7703	580	670	41	22122	GRIK2,RLBP1,COBL,SLC1A3,STK39,ATP2B2,DNER,KCNA2,SLC6A1,PCSK2,RCVRN,ROR2,KREMEN1,SEZ6,SCN1A,GRIP2,KCNIP4,GNB3,CACNA1B,SNCAIP,SLC1A4,CPLX1,CADM2,EPHA7,GRIA4,MME,CRYAB,GNAT1,SYNDIG1,KCNH1,SORL1,APOE,KCND3,NRSN1,SLC8A1,ASCL1,CKB,BRINP1,RPL28,RACK1,RPS6
GO:CC	synaptic membrane	GO:0097060	0.0002309	3.63658	397	450	25	22122	DGKB,GABRG3,LRRC4C,GRIK2,GRID2,CNTN1,ATP2B2,KCNA2,SLC6A1,SLC6A11,PCDH17,LIN7A,NLGN1,NLGN4Y,GRIP2,SNCAIP,GRIK1,IL1RAPL1,EPHA7,GRIA4,CRYAB,DCC,SYNDIG1,KCNH1,ADAM23
GO:CC	glutamatergic synapse	GO:0098978	0.000522975	3.28152	433	839	38	22122	DGKB,LRRC4C,TNIK,GRIK2,GRID2,PPP3CC,ATP2B2,KCNA2,NRG1,PCDH17,PLCB1,NOS1AP,ROR2,NLGN1,NLGN4Y,GRIP2,OPHN1,NRXN3,CPLX1,IL1RAPL1,EPHB1,CTTNBP2,EPHA7,ADAM23,APOE,BTBD9,CADPS,APBA1,NRP1,RPL22,ACTB,HIP1,SORT1,TNR,GRID2IP,ANO2,GRIN2A,PAK3
GO:CC	presynapse	GO:0098793	0.000633046	3.19856	569	878	47	22122	TNIK,GRIK2,CNTN1,PPP3CC,ATP2B2,KCNA2,SLC6A1,SLC6A11,PCDH17,SV2B,LIN7A,NLGN1,NLGN4Y,PRKN,OPHN1,NRXN3,ITSN1,SLC6A12,SNCAIP,AAK1,NR4A1,CPLX1,CTTNBP2,MME,SYNDIG1,KCNH1,ADAM23,SCAMP5,CADPS,APBA1,ITSN2,TRIM9,SLC8A1,KCTD8,RPL22,ACTB,ACTG1,HIP1,BCL2L1,BORCS5,STX12,ANO2,ATP6V1A,GRIN2A,AP3S2,GRM7,ATCAY
GO:CC	GABA-ergic synapse	GO:0098982	0.00071599	3.14509	89	284	9	22122	GABRG3,ATP2B2,SLC6A1,SLC6A11,PCDH17,PLCB1,NLGN1,NLGN4Y,NRXN3
GO:CC	extrinsic component of plasma membrane	GO:0019897	0.000717052	3.14445	167	717	19	22122	TF,STAC,CDH23,GNG7,CDH4,TIAM1,ESYT2,GNB3,AAK1,GNGT2,CTNNA2,CYTH1,GNAT1,CUBN,STAC2,CDH18,CDH20,GNA14,HIP1
GO:CC	neuronal cell body	GO:0043025	0.000976521	3.01032	512	615	34	22122	GRIK2,COBL,SLC1A3,ATP2B2,DNER,KCNA2,SLC6A1,PCSK2,RCVRN,ROR2,KREMEN1,SEZ6,SCN1A,GRIP2,KCNIP4,CACNA1B,SNCAIP,SLC1A4,CPLX1,CADM2,EPHA7,GRIA4,MME,CRYAB,GNAT1,KCNH1,SORL1,APOE,KCND3,NRSN1,SLC8A1,ASCL1,CKB,BRINP1
GO:CC	cytoplasmic side of rough endoplasmic reticulum membrane	GO:0098556	0.00157741	2.80205	5	697	4	22122	RPS26,RPS28,RPL27,RPS29
GO:CC	neuron spine	GO:0044309	0.00250984	2.60035	182	525	16	22122	GRID2,SIPA1L1,ATP2B2,DOCK10,CPEB4,PALMD,SEZ6,NLGN1,GRIP2,OPHN1,CTTNBP2,GRIA4,CRYAB,SYNDIG1,KCND3,APBA1
GO:CC	actin-based cell projection	GO:0098858	0.00304276	2.51673	221	295	13	22122	CDH23,FGF13,CD44,MYO6,PCDH15,PDGFRA,MTTP,NOS1AP,RIPOR2,MYO1E,NLGN1,WWOX,NFASC
GO:CC	receptor complex	GO:0043235	0.00341926	2.46607	534	22	6	22122	TF,FLT1,GABRG3,EPHA3,GRIK2,GRID2
GO:CC	microtubule end	GO:1990752	0.00457645	2.33947	35	339	6	22122	DST,SLAIN1,NAV3,CLIP4,SVIL,CLIP1
GO:CC	basal part of cell	GO:0045178	0.00538209	2.26905	289	171	11	22122	TF,CADM1,DST,FAP,SLC1A3,STK39,ATP2B2,CD44,MPZ,MTTP,LIN7A
GO:CC	dendritic spine	GO:0043197	0.00743674	2.12862	177	525	15	22122	GRID2,SIPA1L1,ATP2B2,DOCK10,CPEB4,PALMD,SEZ6,NLGN1,OPHN1,CTTNBP2,GRIA4,CRYAB,SYNDIG1,KCND3,APBA1
GO:CC	presynaptic membrane	GO:0042734	0.00771663	2.11257	163	115	7	22122	GRIK2,CNTN1,ATP2B2,KCNA2,SLC6A1,SLC6A11,PCDH17
GO:CC	rough endoplasmic reticulum	GO:0005791	0.00927745	2.03257	85	748	12	22122	MPZ,MTTP,RPS26,SLC7A11,RPS28,RPL18,RPL6,RPS23,RPL4,RPL27,RPS29,RPS21
GO:CC	basal plasma membrane	GO:0009925	0.0165494	1.78122	270	171	10	22122	TF,CADM1,DST,SLC1A3,STK39,ATP2B2,CD44,MPZ,MTTP,LIN7A
GO:CC	cytoplasmic side of membrane	GO:0098562	0.0176417	1.75346	207	787	20	22122	STAC,KIT,GNG7,RPS26,TIAM1,ESYT2,GNB3,GNGT2,SHROOM4,CYTH1,GNAT1,MTSS1,STAC2,EEF1A1,RPS28,RPL27,RPS29,GNA14,PTPN7,BORCS5
GO:CC	axon	GO:0030424	0.02042	1.68994	648	447	29	22122	NFIB,DST,APBB2,CNTN1,COBL,FGF13,KCNA2,KIF21A,SLC6A1,CPEB4,SEMA6A,SPOCK1,SCN1A,OPHN1,NFASC,UNC80,MYH14,AAK1,CPLX1,IL1RAPL1,SH2D3C,EPHB1,CADM2,CTNNA2,MME,CRYAB,DCC,SCN9A,KCNH1
GO:CC	photoreceptor inner segment	GO:0001917	0.0225084	1.64766	71	554	9	22122	HKDC1,CDH23,RCVRN,PDC,RP1,AIPL1,ASRGL1,GNAT1,PRPH2
GO:CC	endoplasmic reticulum	GO:0005783	0.030463	1.51623	2059	785	105	22122	TF,DST,APBB2,RASGRP1,WNT5B,PRKCA,PCYT1B,PDGFC,KCNA2,SLC35D1,SNX10,NR3C2,RASD1,AHCYL2,CPEB4,LHCGR,PDGFRA,MPZ,MTTP,SPTLC3,P3H2,FOS,NOS1AP,PCSK6,SEZ6,MAN1C1,OSBP2,CHRDL1,B3GLCT,RPS26,PRKN,KCNIP4,PTN,ESYT2,FUT10,ABCG1,PLAAT3,CYP26A1,G6PC2,ATP11A,ACSL6,KSR1,EPHB1,SGMS1,MYRFL,MAMDC2,ABCB9,SORL1,ATP8A1,APOE,PLA2G4C,DIAPH2,CERS4,STX8,SLC7A11,CUBN,HHAT,CCDC3,RETREG1,MAP3K5,LPCAT2,PDZD2,CCN1,RNF43,BRINP1,H…
GO:CC	cytoplasm	GO:0005737	0.0386871	1.41243	12365	727	455	22122	DGKB,TF,FLT1,DST,SAT1,FAP,RARB,TNIK,EPHA3,SRGAP1,APBB2,PROX1,FAM110B,FABP7,RLBP1,HKDC1,RASGRP1,STAC,LSAMP,ST3GAL1,GALNT13,WNT5B,COBL,ARHGEF3,NCALD,ST8SIA5,SCARB1,PRKCA,PCYT1B,QDPR,SASH1,SLC1A3,ALDH1A2,SLAIN1,HECW2,PDGFC,KDM5B,PPP3CC,STK39,SIPA1L1,SERINC5,ATP2B2,UST,GUCY1A2,TRIM2,DNER,FGF13,KCNA2,LUM,SOX6,ST8SIA1,KIF21A,EPAS1,RASGEF1B,LIMD1,ZC3HAV1,CALM1,SLC35D1,MAPK4,RHPN2,PLCE1,SLC15A3,SLC6A11,H…
GO:CC	postsynaptic density membrane	GO:0098839	0.0470626	1.32732	96	447	9	22122	LRRC4C,GRID2,ATP2B2,LIN7A,NLGN4Y,EPHA7,DCC,SYNDIG1,KCNH1
KEGG	Ribosome	KEGG:03010	2.40814e-41	40.6183	153	748	80	8161	RPS4Y1,RPS26,RPL7,RPL10,RPS16,RPS11,RPL7A,RPL19,RPL13A,RPS3A,RPL3,RPS27A,RPLP0,RPL15,RPL11,RPLP1,RPL27A,RPS13,RPS10,RPL28,RPL18A,RPS15,RPS9,RPS28,RPL18,RPL24,FAU,RPL6,RPL10A,RPL29,RPS7,RPL5,RPS18,RPS14,RPL30,RPL9,RPL13,RPL8,RPS5,RPSA,RPS24,RPL32,RPS25,RPS6,RPL41,RPS27,RPL17,RPS23,RPL4,RPS3,RPL22,RPLP2,RPS20,RPL37A,RPS19,UBA52,RPL14,RPL35,RPS8,RPS12,RPL12,RPL23,RPS15A,RPL36,RPL26,RPL27,RPS29,RPL35…
KEGG	Coronavirus disease - COVID-19	KEGG:05171	1.64477e-30	29.7839	231	726	85	8161	PRKCA,FOS,RPS4Y1,RPS26,STAT3,IFIH1,PIK3R3,NRP1,RPL7,RPL10,RPS16,RPS11,RPL7A,RPL19,RPL13A,RPS3A,RPL3,RPS27A,RPLP0,RPL15,RPL11,RPLP1,RPL27A,RPS13,RPS10,RPL28,RPL18A,RPS15,RPS9,RPS28,RPL18,RPL24,FAU,RPL6,RPL10A,RPL29,RPS7,RPL5,RPS18,RPS14,RPL30,RPL9,RPL13,RPL8,RPS5,RPSA,RPS24,RPL32,RPS25,RPS6,RPL41,RPS27,RPL17,RPS23,RPL4,RPS3,RPL22,RPLP2,RPS20,RPL37A,RPS19,UBA52,RPL14,RPL35,RPS8,RPS12,RPL12,RPL23,RP…
KEGG	Glycosphingolipid biosynthesis - ganglio series	KEGG:00604	0.0417088	1.37977	14	85	3	8161	ST3GAL1,ST8SIA5,ST8SIA1
REAC	Eukaryotic Translation Elongation	REAC:R-HSA-156842	1.11395e-84	83.9531	94	748	84	10790	RPS4Y1,RPS26,RPL7,RPL10,RPS16,RPS11,RPL7A,RPL19,RPL13A,EEF1A1,RPS3A,RPL3,RPS27A,EEF1G,RPLP0,RPL15,RPL11,RPLP1,RPL27A,RPS13,RPS10,RPL28,RPL18A,RPS15,RPS9,RPS28,RPL18,RPL24,FAU,RPL6,RPL10A,RPL29,RPS7,RPL5,RPS18,RPS14,RPL30,RPL9,RPL13,RPL8,RPS5,RPSA,RPS24,RPL32,RPS25,RPS6,RPL41,RPS27,RPL17,RPS23,RPL4,RPS3,RPL22,RPLP2,RPS20,RPL37A,RPS19,UBA52,RPL14,RPL35,RPS8,RPS12,RPL12,RPL23,RPS15A,RPL36,RPL26,RPL2…
REAC	Peptide chain elongation	REAC:R-HSA-156902	2.80226e-84	83.5525	90	748	82	10790	RPS4Y1,RPS26,RPL7,RPL10,RPS16,RPS11,RPL7A,RPL19,RPL13A,EEF1A1,RPS3A,RPL3,RPS27A,RPLP0,RPL15,RPL11,RPLP1,RPL27A,RPS13,RPS10,RPL28,RPL18A,RPS15,RPS9,RPS28,RPL18,RPL24,FAU,RPL6,RPL10A,RPL29,RPS7,RPL5,RPS18,RPS14,RPL30,RPL9,RPL13,RPL8,RPS5,RPSA,RPS24,RPL32,RPS25,RPS6,RPL41,RPS27,RPL17,RPS23,RPL4,RPS3,RPL22,RPLP2,RPS20,RPL37A,RPS19,UBA52,RPL14,RPL35,RPS8,RPS12,RPL12,RPL23,RPS15A,RPL36,RPL26,RPL27,RPS2…
REAC	Viral mRNA Translation	REAC:R-HSA-192823	4.68128e-80	79.3296	90	748	80	10790	RPS4Y1,RPS26,RPL7,RPL10,RPS16,RPS11,RPL7A,RPL19,RPL13A,RPS3A,RPL3,RPS27A,RPLP0,RPL15,RPL11,RPLP1,RPL27A,RPS13,RPS10,RPL28,RPL18A,RPS15,RPS9,RPS28,RPL18,RPL24,FAU,RPL6,RPL10A,RPL29,RPS7,RPL5,RPS18,RPS14,RPL30,RPL9,RPL13,RPL8,RPS5,RPSA,RPS24,RPL32,RPS25,RPS6,RPL41,RPS27,RPL17,RPS23,RPL4,RPS3,RPL22,RPLP2,RPS20,RPL37A,RPS19,UBA52,RPL14,RPL35,RPS8,RPS12,RPL12,RPL23,RPS15A,RPL36,RPL26,RPL27,RPS29,RPL35…
REAC	Eukaryotic Translation Termination	REAC:R-HSA-72764	1.10561e-76	75.9564	94	748	80	10790	RPS4Y1,RPS26,RPL7,RPL10,RPS16,RPS11,RPL7A,RPL19,RPL13A,RPS3A,RPL3,RPS27A,RPLP0,RPL15,RPL11,RPLP1,RPL27A,RPS13,RPS10,RPL28,RPL18A,RPS15,RPS9,RPS28,RPL18,RPL24,FAU,RPL6,RPL10A,RPL29,RPS7,RPL5,RPS18,RPS14,RPL30,RPL9,RPL13,RPL8,RPS5,RPSA,RPS24,RPL32,RPS25,RPS6,RPL41,RPS27,RPL17,RPS23,RPL4,RPS3,RPL22,RPLP2,RPS20,RPL37A,RPS19,UBA52,RPL14,RPL35,RPS8,RPS12,RPL12,RPL23,RPS15A,RPL36,RPL26,RPL27,RPS29,RPL35…
REAC	Selenocysteine synthesis	REAC:R-HSA-2408557	1.10561e-76	75.9564	94	748	80	10790	RPS4Y1,RPS26,RPL7,RPL10,RPS16,RPS11,RPL7A,RPL19,RPL13A,RPS3A,RPL3,RPS27A,RPLP0,RPL15,RPL11,RPLP1,RPL27A,RPS13,RPS10,RPL28,RPL18A,RPS15,RPS9,RPS28,RPL18,RPL24,FAU,RPL6,RPL10A,RPL29,RPS7,RPL5,RPS18,RPS14,RPL30,RPL9,RPL13,RPL8,RPS5,RPSA,RPS24,RPL32,RPS25,RPS6,RPL41,RPS27,RPL17,RPS23,RPL4,RPS3,RPL22,RPLP2,RPS20,RPL37A,RPS19,UBA52,RPL14,RPL35,RPS8,RPS12,RPL12,RPL23,RPS15A,RPL36,RPL26,RPL27,RPS29,RPL35…
REAC	Nonsense Mediated Decay (NMD) independent of the Exon Junction Complex (EJC)	REAC:R-HSA-975956	3.69905e-75	74.4319	96	748	80	10790	RPS4Y1,RPS26,RPL7,RPL10,RPS16,RPS11,RPL7A,RPL19,RPL13A,RPS3A,RPL3,RPS27A,RPLP0,RPL15,RPL11,RPLP1,RPL27A,RPS13,RPS10,RPL28,RPL18A,RPS15,RPS9,RPS28,RPL18,RPL24,FAU,RPL6,RPL10A,RPL29,RPS7,RPL5,RPS18,RPS14,RPL30,RPL9,RPL13,RPL8,RPS5,RPSA,RPS24,RPL32,RPS25,RPS6,RPL41,RPS27,RPL17,RPS23,RPL4,RPS3,RPL22,RPLP2,RPS20,RPL37A,RPS19,UBA52,RPL14,RPL35,RPS8,RPS12,RPL12,RPL23,RPS15A,RPL36,RPL26,RPL27,RPS29,RPL35…
REAC	Formation of a pool of free 40S subunits	REAC:R-HSA-72689	4.55577e-71	70.3414	102	748	80	10790	RPS4Y1,RPS26,RPL7,RPL10,RPS16,RPS11,RPL7A,RPL19,RPL13A,RPS3A,RPL3,RPS27A,RPLP0,RPL15,RPL11,RPLP1,RPL27A,RPS13,RPS10,RPL28,RPL18A,RPS15,RPS9,RPS28,RPL18,RPL24,FAU,RPL6,RPL10A,RPL29,RPS7,RPL5,RPS18,RPS14,RPL30,RPL9,RPL13,RPL8,RPS5,RPSA,RPS24,RPL32,RPS25,RPS6,RPL41,RPS27,RPL17,RPS23,RPL4,RPS3,RPL22,RPLP2,RPS20,RPL37A,RPS19,UBA52,RPL14,RPL35,RPS8,RPS12,RPL12,RPL23,RPS15A,RPL36,RPL26,RPL27,RPS29,RPL35…
REAC	Response of EIF2AK4 (GCN2) to amino acid deficiency	REAC:R-HSA-9633012	4.55577e-71	70.3414	102	748	80	10790	RPS4Y1,RPS26,RPL7,RPL10,RPS16,RPS11,RPL7A,RPL19,RPL13A,RPS3A,RPL3,RPS27A,RPLP0,RPL15,RPL11,RPLP1,RPL27A,RPS13,RPS10,RPL28,RPL18A,RPS15,RPS9,RPS28,RPL18,RPL24,FAU,RPL6,RPL10A,RPL29,RPS7,RPL5,RPS18,RPS14,RPL30,RPL9,RPL13,RPL8,RPS5,RPSA,RPS24,RPL32,RPS25,RPS6,RPL41,RPS27,RPL17,RPS23,RPL4,RPS3,RPL22,RPLP2,RPS20,RPL37A,RPS19,UBA52,RPL14,RPL35,RPS8,RPS12,RPL12,RPL23,RPS15A,RPL36,RPL26,RPL27,RPS29,RPL35…
REAC	L13a-mediated translational silencing of Ceruloplasmin expression	REAC:R-HSA-156827	2.11321e-65	64.6751	112	748	80	10790	RPS4Y1,RPS26,RPL7,RPL10,RPS16,RPS11,RPL7A,RPL19,RPL13A,RPS3A,RPL3,RPS27A,RPLP0,RPL15,RPL11,RPLP1,RPL27A,RPS13,RPS10,RPL28,RPL18A,RPS15,RPS9,RPS28,RPL18,RPL24,FAU,RPL6,RPL10A,RPL29,RPS7,RPL5,RPS18,RPS14,RPL30,RPL9,RPL13,RPL8,RPS5,RPSA,RPS24,RPL32,RPS25,RPS6,RPL41,RPS27,RPL17,RPS23,RPL4,RPS3,RPL22,RPLP2,RPS20,RPL37A,RPS19,UBA52,RPL14,RPL35,RPS8,RPS12,RPL12,RPL23,RPS15A,RPL36,RPL26,RPL27,RPS29,RPL35…
REAC	GTP hydrolysis and joining of the 60S ribosomal subunit	REAC:R-HSA-72706	6.78921e-65	64.1682	113	748	80	10790	RPS4Y1,RPS26,RPL7,RPL10,RPS16,RPS11,RPL7A,RPL19,RPL13A,RPS3A,RPL3,RPS27A,RPLP0,RPL15,RPL11,RPLP1,RPL27A,RPS13,RPS10,RPL28,RPL18A,RPS15,RPS9,RPS28,RPL18,RPL24,FAU,RPL6,RPL10A,RPL29,RPS7,RPL5,RPS18,RPS14,RPL30,RPL9,RPL13,RPL8,RPS5,RPSA,RPS24,RPL32,RPS25,RPS6,RPL41,RPS27,RPL17,RPS23,RPL4,RPS3,RPL22,RPLP2,RPS20,RPL37A,RPS19,UBA52,RPL14,RPL35,RPS8,RPS12,RPL12,RPL23,RPS15A,RPL36,RPL26,RPL27,RPS29,RPL35…
REAC	SRP-dependent cotranslational protein targeting to membrane	REAC:R-HSA-1799339	6.78921e-65	64.1682	113	748	80	10790	RPS4Y1,RPS26,RPL7,RPL10,RPS16,RPS11,RPL7A,RPL19,RPL13A,RPS3A,RPL3,RPS27A,RPLP0,RPL15,RPL11,RPLP1,RPL27A,RPS13,RPS10,RPL28,RPL18A,RPS15,RPS9,RPS28,RPL18,RPL24,FAU,RPL6,RPL10A,RPL29,RPS7,RPL5,RPS18,RPS14,RPL30,RPL9,RPL13,RPL8,RPS5,RPSA,RPS24,RPL32,RPS25,RPS6,RPL41,RPS27,RPL17,RPS23,RPL4,RPS3,RPL22,RPLP2,RPS20,RPL37A,RPS19,UBA52,RPL14,RPL35,RPS8,RPS12,RPL12,RPL23,RPS15A,RPL36,RPL26,RPL27,RPS29,RPL35…
REAC	Selenoamino acid metabolism	REAC:R-HSA-2408522	1.79855e-64	63.7451	117	748	81	10790	RPS4Y1,RPS26,PAPSS1,RPL7,RPL10,RPS16,RPS11,RPL7A,RPL19,RPL13A,RPS3A,RPL3,RPS27A,RPLP0,RPL15,RPL11,RPLP1,RPL27A,RPS13,RPS10,RPL28,RPL18A,RPS15,RPS9,RPS28,RPL18,RPL24,FAU,RPL6,RPL10A,RPL29,RPS7,RPL5,RPS18,RPS14,RPL30,RPL9,RPL13,RPL8,RPS5,RPSA,RPS24,RPL32,RPS25,RPS6,RPL41,RPS27,RPL17,RPS23,RPL4,RPS3,RPL22,RPLP2,RPS20,RPL37A,RPS19,UBA52,RPL14,RPL35,RPS8,RPS12,RPL12,RPL23,RPS15A,RPL36,RPL26,RPL27,RPS2…
REAC	Nonsense-Mediated Decay (NMD)	REAC:R-HSA-927802	1.99046e-63	62.701	116	748	80	10790	RPS4Y1,RPS26,RPL7,RPL10,RPS16,RPS11,RPL7A,RPL19,RPL13A,RPS3A,RPL3,RPS27A,RPLP0,RPL15,RPL11,RPLP1,RPL27A,RPS13,RPS10,RPL28,RPL18A,RPS15,RPS9,RPS28,RPL18,RPL24,FAU,RPL6,RPL10A,RPL29,RPS7,RPL5,RPS18,RPS14,RPL30,RPL9,RPL13,RPL8,RPS5,RPSA,RPS24,RPL32,RPS25,RPS6,RPL41,RPS27,RPL17,RPS23,RPL4,RPS3,RPL22,RPLP2,RPS20,RPL37A,RPS19,UBA52,RPL14,RPL35,RPS8,RPS12,RPL12,RPL23,RPS15A,RPL36,RPL26,RPL27,RPS29,RPL35…
REAC	Nonsense Mediated Decay (NMD) enhanced by the Exon Junction Complex (EJC)	REAC:R-HSA-975957	1.99046e-63	62.701	116	748	80	10790	RPS4Y1,RPS26,RPL7,RPL10,RPS16,RPS11,RPL7A,RPL19,RPL13A,RPS3A,RPL3,RPS27A,RPLP0,RPL15,RPL11,RPLP1,RPL27A,RPS13,RPS10,RPL28,RPL18A,RPS15,RPS9,RPS28,RPL18,RPL24,FAU,RPL6,RPL10A,RPL29,RPS7,RPL5,RPS18,RPS14,RPL30,RPL9,RPL13,RPL8,RPS5,RPSA,RPS24,RPL32,RPS25,RPS6,RPL41,RPS27,RPL17,RPS23,RPL4,RPS3,RPL22,RPLP2,RPS20,RPL37A,RPS19,UBA52,RPL14,RPL35,RPS8,RPS12,RPL12,RPL23,RPS15A,RPL36,RPL26,RPL27,RPS29,RPL35…
REAC	Cap-dependent Translation Initiation	REAC:R-HSA-72737	1.38624e-61	60.8582	120	748	80	10790	RPS4Y1,RPS26,RPL7,RPL10,RPS16,RPS11,RPL7A,RPL19,RPL13A,RPS3A,RPL3,RPS27A,RPLP0,RPL15,RPL11,RPLP1,RPL27A,RPS13,RPS10,RPL28,RPL18A,RPS15,RPS9,RPS28,RPL18,RPL24,FAU,RPL6,RPL10A,RPL29,RPS7,RPL5,RPS18,RPS14,RPL30,RPL9,RPL13,RPL8,RPS5,RPSA,RPS24,RPL32,RPS25,RPS6,RPL41,RPS27,RPL17,RPS23,RPL4,RPS3,RPL22,RPLP2,RPS20,RPL37A,RPS19,UBA52,RPL14,RPL35,RPS8,RPS12,RPL12,RPL23,RPS15A,RPL36,RPL26,RPL27,RPS29,RPL35…
REAC	Eukaryotic Translation Initiation	REAC:R-HSA-72613	1.38624e-61	60.8582	120	748	80	10790	RPS4Y1,RPS26,RPL7,RPL10,RPS16,RPS11,RPL7A,RPL19,RPL13A,RPS3A,RPL3,RPS27A,RPLP0,RPL15,RPL11,RPLP1,RPL27A,RPS13,RPS10,RPL28,RPL18A,RPS15,RPS9,RPS28,RPL18,RPL24,FAU,RPL6,RPL10A,RPL29,RPS7,RPL5,RPS18,RPS14,RPL30,RPL9,RPL13,RPL8,RPS5,RPSA,RPS24,RPL32,RPS25,RPS6,RPL41,RPS27,RPL17,RPS23,RPL4,RPS3,RPL22,RPLP2,RPS20,RPL37A,RPS19,UBA52,RPL14,RPL35,RPS8,RPS12,RPL12,RPL23,RPS15A,RPL36,RPL26,RPL27,RPS29,RPL35…
REAC	Influenza Viral RNA Transcription and Replication	REAC:R-HSA-168273	2.56561e-56	55.5908	133	748	80	10790	RPS4Y1,RPS26,RPL7,RPL10,RPS16,RPS11,RPL7A,RPL19,RPL13A,RPS3A,RPL3,RPS27A,RPLP0,RPL15,RPL11,RPLP1,RPL27A,RPS13,RPS10,RPL28,RPL18A,RPS15,RPS9,RPS28,RPL18,RPL24,FAU,RPL6,RPL10A,RPL29,RPS7,RPL5,RPS18,RPS14,RPL30,RPL9,RPL13,RPL8,RPS5,RPSA,RPS24,RPL32,RPS25,RPS6,RPL41,RPS27,RPL17,RPS23,RPL4,RPS3,RPL22,RPLP2,RPS20,RPL37A,RPS19,UBA52,RPL14,RPL35,RPS8,RPS12,RPL12,RPL23,RPS15A,RPL36,RPL26,RPL27,RPS29,RPL35…
REAC	Influenza Infection	REAC:R-HSA-168255	1.61152e-52	51.7928	152	748	82	10790	RPS4Y1,RPS26,KPNA3,RPL7,RPL10,RPS16,RPS11,RPL7A,RPL19,RPL13A,RPS3A,RPL3,RPS27A,RPLP0,RPL15,RPL11,RPLP1,RPL27A,RPS13,RPS10,RPL28,RPL18A,RPS15,RPS9,RPS28,RPL18,RPL24,FAU,RPL6,RPL10A,RPL29,RPS7,SLC25A6,RPL5,RPS18,RPS14,RPL30,RPL9,RPL13,RPL8,RPS5,RPSA,RPS24,RPL32,RPS25,RPS6,RPL41,RPS27,RPL17,RPS23,RPL4,RPS3,RPL22,RPLP2,RPS20,RPL37A,RPS19,UBA52,RPL14,RPL35,RPS8,RPS12,RPL12,RPL23,RPS15A,RPL36,RPL26,RPL…
REAC	Cellular response to starvation	REAC:R-HSA-9711097	8.17044e-50	49.0878	157	748	81	10790	RPS4Y1,RPS26,SESN1,RPL7,RPL10,RPS16,RPS11,RPL7A,RPL19,RPL13A,RPS3A,RPL3,RPS27A,RPLP0,RPL15,RPL11,RPLP1,RPL27A,RPS13,RPS10,RPL28,RPL18A,RPS15,RPS9,RPS28,RPL18,RPL24,FAU,RPL6,RPL10A,RPL29,RPS7,RPL5,RPS18,RPS14,RPL30,RPL9,RPL13,RPL8,RPS5,RPSA,RPS24,RPL32,RPS25,RPS6,RPL41,RPS27,RPL17,RPS23,RPL4,RPS3,RPL22,RPLP2,RPS20,RPL37A,RPS19,UBA52,RPL14,RPL35,RPS8,RPS12,RPL12,RPL23,RPS15A,RPL36,RPL26,RPL27,RPS29…
REAC	Regulation of expression of SLITs and ROBOs	REAC:R-HSA-9010553	5.95514e-45	44.2251	171	748	80	10790	RPS4Y1,RPS26,RPL7,RPL10,RPS16,RPS11,RPL7A,RPL19,RPL13A,RPS3A,RPL3,RPS27A,RPLP0,RPL15,RPL11,RPLP1,RPL27A,RPS13,RPS10,RPL28,RPL18A,RPS15,RPS9,RPS28,RPL18,RPL24,FAU,RPL6,RPL10A,RPL29,RPS7,RPL5,RPS18,RPS14,RPL30,RPL9,RPL13,RPL8,RPS5,RPSA,RPS24,RPL32,RPS25,RPS6,RPL41,RPS27,RPL17,RPS23,RPL4,RPS3,RPL22,RPLP2,RPS20,RPL37A,RPS19,UBA52,RPL14,RPL35,RPS8,RPS12,RPL12,RPL23,RPS15A,RPL36,RPL26,RPL27,RPS29,RPL35…
REAC	Major pathway of rRNA processing in the nucleolus and cytosol	REAC:R-HSA-6791226	2.20639e-42	41.6563	182	748	80	10790	RPS4Y1,RPS26,RPL7,RPL10,RPS16,RPS11,RPL7A,RPL19,RPL13A,RPS3A,RPL3,RPS27A,RPLP0,RPL15,RPL11,RPLP1,RPL27A,RPS13,RPS10,RPL28,RPL18A,RPS15,RPS9,RPS28,RPL18,RPL24,FAU,RPL6,RPL10A,RPL29,RPS7,RPL5,RPS18,RPS14,RPL30,RPL9,RPL13,RPL8,RPS5,RPSA,RPS24,RPL32,RPS25,RPS6,RPL41,RPS27,RPL17,RPS23,RPL4,RPS3,RPL22,RPLP2,RPS20,RPL37A,RPS19,UBA52,RPL14,RPL35,RPS8,RPS12,RPL12,RPL23,RPS15A,RPL36,RPL26,RPL27,RPS29,RPL35…
REAC	Signaling by ROBO receptors	REAC:R-HSA-376176	2.02258e-40	39.6941	217	726	84	10790	SRGAP1,PRKCA,NELL2,RPS4Y1,RPS26,DCC,NRP1,RPL7,RPL10,RPS16,RPS11,RPL7A,RPL19,RPL13A,RPS3A,RPL3,RPS27A,RPLP0,RPL15,RPL11,RPLP1,RPL27A,RPS13,RPS10,RPL28,RPL18A,RPS15,RPS9,RPS28,RPL18,RPL24,FAU,RPL6,RPL10A,RPL29,RPS7,RPL5,RPS18,RPS14,RPL30,RPL9,RPL13,RPL8,RPS5,RPSA,RPS24,RPL32,RPS25,RPS6,RPL41,RPS27,RPL17,RPS23,RPL4,RPS3,RPL22,RPLP2,RPS20,RPL37A,RPS19,UBA52,RPL14,RPL35,RPS8,RPS12,RPL12,RPL23,RPS15A,R…
REAC	rRNA processing in the nucleus and cytosol	REAC:R-HSA-8868773	3.03416e-40	39.518	192	748	80	10790	RPS4Y1,RPS26,RPL7,RPL10,RPS16,RPS11,RPL7A,RPL19,RPL13A,RPS3A,RPL3,RPS27A,RPLP0,RPL15,RPL11,RPLP1,RPL27A,RPS13,RPS10,RPL28,RPL18A,RPS15,RPS9,RPS28,RPL18,RPL24,FAU,RPL6,RPL10A,RPL29,RPS7,RPL5,RPS18,RPS14,RPL30,RPL9,RPL13,RPL8,RPS5,RPSA,RPS24,RPL32,RPS25,RPS6,RPL41,RPS27,RPL17,RPS23,RPL4,RPS3,RPL22,RPLP2,RPS20,RPL37A,RPS19,UBA52,RPL14,RPL35,RPS8,RPS12,RPL12,RPL23,RPS15A,RPL36,RPL26,RPL27,RPS29,RPL35…
REAC	rRNA processing	REAC:R-HSA-72312	2.87956e-38	37.5407	202	748	80	10790	RPS4Y1,RPS26,RPL7,RPL10,RPS16,RPS11,RPL7A,RPL19,RPL13A,RPS3A,RPL3,RPS27A,RPLP0,RPL15,RPL11,RPLP1,RPL27A,RPS13,RPS10,RPL28,RPL18A,RPS15,RPS9,RPS28,RPL18,RPL24,FAU,RPL6,RPL10A,RPL29,RPS7,RPL5,RPS18,RPS14,RPL30,RPL9,RPL13,RPL8,RPS5,RPSA,RPS24,RPL32,RPS25,RPS6,RPL41,RPS27,RPL17,RPS23,RPL4,RPS3,RPL22,RPLP2,RPS20,RPL37A,RPS19,UBA52,RPL14,RPL35,RPS8,RPS12,RPL12,RPL23,RPS15A,RPL36,RPL26,RPL27,RPS29,RPL35…
REAC	Translation	REAC:R-HSA-72766	1.74061e-28	27.7593	292	726	83	10790	RPS4Y1,RPS26,RPL7,RPL10,RPS16,RPS11,RPL7A,RPL19,RPL13A,EEF1A1,RPS3A,RPL3,RPS27A,EEF1G,RPLP0,RPL15,RPL11,RPLP1,RPL27A,RPS13,RPS10,RPL28,RPL18A,RPS15,RPS9,RPS28,RPL18,RPL24,FAU,RPL6,RPL10A,RPL29,RPS7,RPL5,RPS18,RPS14,RPL30,RPL9,RPL13,RPL8,RPS5,RPSA,RPS24,RPL32,RPS25,RPS6,RPL41,RPS27,RPL17,RPS23,RPL4,RPS3,RPL22,RPLP2,RPS20,RPL37A,RPS19,UBA52,RPL14,RPL35,RPS8,RPS12,RPL12,RPL23,RPS15A,RPL36,RPL26,RPL2…
REAC	Metabolism of amino acids and derivatives	REAC:R-HSA-71291	6.9862e-25	24.1558	369	726	89	10790	SAT1,QDPR,SERINC5,SLC6A11,CRYM,RPS4Y1,RPS26,SLC6A12,BBOX1,ASRGL1,PAPSS1,CKB,RPL7,RPL10,RPS16,RPS11,RPL7A,RPL19,RPL13A,RPS3A,RPL3,RPS27A,RPLP0,RPL15,RPL11,RPLP1,RPL27A,RPS13,RPS10,RPL28,RPL18A,RPS15,RPS9,RPS28,RPL18,RPL24,FAU,RPL6,RPL10A,RPL29,RPS7,RPL5,RPS18,RPS14,RPL30,RPL9,RPL13,RPL8,RPS5,RPSA,RPS24,RPL32,RPS25,RPS6,RPL41,RPS27,RPL17,RPS23,RPL4,RPS3,RPL22,RPLP2,RPS20,RPL37A,RPS19,UBA52,RPL14,RP…
REAC	Axon guidance	REAC:R-HSA-422475	1.11098e-23	22.9543	549	730	110	10790	EPHA3,SRGAP1,CHL1,CNTN1,PRKCA,LAMA1,SEMA6A,ARHGEF28,NELL2,RPS4Y1,SEMA5A,SCN1A,RPS26,TIAM1,NFASC,ITSN1,MYH14,NTN4,EPHB1,EPHA7,RPS6KA3,ST8SIA4,DCC,SCN9A,PTPN11,PIK3R3,DAB1,NRP1,UNC5D,SEMA6D,RPL7,RPL10,RPS16,RPS11,RPL7A,RPL19,RPL13A,RPS3A,RPL3,RPS27A,RPLP0,RPL15,RPL11,RPLP1,RPL27A,RPS13,RPS10,RPL28,RPL18A,RPS15,RPS9,RPS28,RPL18,RPL24,FAU,RPL6,RPL10A,RPL29,RPS7,RPL5,RPS18,RPS14,RPL30,RPL9,RPL13,RPL8,…
REAC	SARS-CoV-2 modulates host translation machinery	REAC:R-HSA-9754678	1.19682e-23	22.922	51	748	33	10790	RPS4Y1,RPS26,RPS16,RPS11,RPS3A,RPS27A,RPS13,RPS10,RPS15,RPS9,RPS28,FAU,RPS7,RPS18,RPS14,RPS5,RPSA,RPS24,RPS25,RPS6,RPS27,RPS23,RPS3,RPS20,RPS19,RPS8,RPS12,RPS15A,RPS29,RPS4X,RPS17,RPS2,RPS21
REAC	Formation of the ternary complex, and subsequently, the 43S complex	REAC:R-HSA-72695	3.06408e-23	22.5137	52	748	33	10790	RPS4Y1,RPS26,RPS16,RPS11,RPS3A,RPS27A,RPS13,RPS10,RPS15,RPS9,RPS28,FAU,RPS7,RPS18,RPS14,RPS5,RPSA,RPS24,RPS25,RPS6,RPS27,RPS23,RPS3,RPS20,RPS19,RPS8,RPS12,RPS15A,RPS29,RPS4X,RPS17,RPS2,RPS21
REAC	Nervous system development	REAC:R-HSA-9675108	1.48102e-22	21.8294	574	730	111	10790	EPHA3,SRGAP1,CHL1,CNTN1,PRKCA,LAMA1,MPZ,SEMA6A,ARHGEF28,NELL2,RPS4Y1,SEMA5A,SCN1A,RPS26,TIAM1,NFASC,ITSN1,MYH14,NTN4,EPHB1,EPHA7,RPS6KA3,ST8SIA4,DCC,SCN9A,PTPN11,PIK3R3,DAB1,NRP1,UNC5D,SEMA6D,RPL7,RPL10,RPS16,RPS11,RPL7A,RPL19,RPL13A,RPS3A,RPL3,RPS27A,RPLP0,RPL15,RPL11,RPLP1,RPL27A,RPS13,RPS10,RPL28,RPL18A,RPS15,RPS9,RPS28,RPL18,RPL24,FAU,RPL6,RPL10A,RPL29,RPS7,RPL5,RPS18,RPS14,RPL30,RPL9,RPL13,R…
REAC	Translation initiation complex formation	REAC:R-HSA-72649	9.96061e-21	20.0017	59	748	33	10790	RPS4Y1,RPS26,RPS16,RPS11,RPS3A,RPS27A,RPS13,RPS10,RPS15,RPS9,RPS28,FAU,RPS7,RPS18,RPS14,RPS5,RPSA,RPS24,RPS25,RPS6,RPS27,RPS23,RPS3,RPS20,RPS19,RPS8,RPS12,RPS15A,RPS29,RPS4X,RPS17,RPS2,RPS21
REAC	Ribosomal scanning and start codon recognition	REAC:R-HSA-72702	9.96061e-21	20.0017	59	748	33	10790	RPS4Y1,RPS26,RPS16,RPS11,RPS3A,RPS27A,RPS13,RPS10,RPS15,RPS9,RPS28,FAU,RPS7,RPS18,RPS14,RPS5,RPSA,RPS24,RPS25,RPS6,RPS27,RPS23,RPS3,RPS20,RPS19,RPS8,RPS12,RPS15A,RPS29,RPS4X,RPS17,RPS2,RPS21
REAC	Activation of the mRNA upon binding of the cap-binding complex and eIFs, and subsequent binding to 43S	REAC:R-HSA-72662	2.07057e-20	19.6839	60	748	33	10790	RPS4Y1,RPS26,RPS16,RPS11,RPS3A,RPS27A,RPS13,RPS10,RPS15,RPS9,RPS28,FAU,RPS7,RPS18,RPS14,RPS5,RPSA,RPS24,RPS25,RPS6,RPS27,RPS23,RPS3,RPS20,RPS19,RPS8,RPS12,RPS15A,RPS29,RPS4X,RPS17,RPS2,RPS21
REAC	Cellular responses to stress	REAC:R-HSA-2262752	4.98554e-08	7.30229	778	726	100	10790	TNIK,EPAS1,LIMD1,MEF2C,NR3C2,UBE2D2,FOS,RPS4Y1,NPAS2,RPS26,HMGA2,SESN1,ABCC1,STAT3,ME1,RPS6KA3,CRYAB,MAP2K6,SLC7A11,GPX3,CRTC3,MAP3K5,RPL7,RPL10,RPS16,RPS11,RPL7A,RPL19,RPL13A,EEF1A1,RPS3A,RPL3,RPS27A,RPLP0,RPL15,RPL11,RPLP1,RPL27A,RPS13,RPS10,RPL28,RPL18A,RPS15,RPS9,RPS28,RPL18,RPL24,FAU,RPL6,RPL10A,RPL29,RPS7,RPL5,RPS18,RPS14,RPL30,RPL9,RPL13,RPL8,RPS5,RPSA,RPS24,RPL32,RPS25,RPS6,RPL41,RPS27,RP…
REAC	Cellular responses to stimuli	REAC:R-HSA-8953897	1.38183e-07	6.85955	792	726	100	10790	TNIK,EPAS1,LIMD1,MEF2C,NR3C2,UBE2D2,FOS,RPS4Y1,NPAS2,RPS26,HMGA2,SESN1,ABCC1,STAT3,ME1,RPS6KA3,CRYAB,MAP2K6,SLC7A11,GPX3,CRTC3,MAP3K5,RPL7,RPL10,RPS16,RPS11,RPL7A,RPL19,RPL13A,EEF1A1,RPS3A,RPL3,RPS27A,RPLP0,RPL15,RPL11,RPLP1,RPL27A,RPS13,RPS10,RPL28,RPL18A,RPS15,RPS9,RPS28,RPL18,RPL24,FAU,RPL6,RPL10A,RPL29,RPS7,RPL5,RPS18,RPS14,RPL30,RPL9,RPL13,RPL8,RPS5,RPSA,RPS24,RPL32,RPS25,RPS6,RPL41,RPS27,RP…
REAC	Developmental Biology	REAC:R-HSA-1266738	9.31541e-07	6.0308	1124	730	127	10790	RARB,EPHA3,SRGAP1,CHL1,CNTN1,PRKCA,LAMA1,EPAS1,MEF2C,CDON,KAZN,MAML2,MPZ,SEMA6A,ARHGEF28,NELL2,CDH4,PCSK6,RPS4Y1,SEMA5A,SCN1A,RPS26,TIAM1,NFASC,ITSN1,MYH14,STAT3,NTN4,EPHB1,EPHA7,CTNNA2,RPS6KA3,ST8SIA4,DCC,SCN9A,ADAM23,NCOA3,MAP2K6,PTPN11,PIK3R3,HES1,DAB1,FOXO1,NRP1,UNC5D,SEMA6D,RPL7,RPL10,RPS16,RPS11,RPL7A,RPL19,RPL13A,RPS3A,RPL3,RPS27A,RPLP0,RPL15,RPL11,RPLP1,RPL27A,RPS13,RPS10,RPL28,RPL18A,RPS…
REAC	Metabolism of RNA	REAC:R-HSA-8953854	1.0204e-05	4.99123	662	755	85	10790	PRKCA,RPS4Y1,RPS26,TRMT11,RPL7,RPL10,RPS16,RPS11,RPL7A,RPL19,RPL13A,RPS3A,RPL3,RPS27A,RPLP0,RPL15,RPL11,RPLP1,RPL27A,RPS13,RPS10,RPL28,RPL18A,RPS15,RPS9,RPS28,RPL18,RPL24,FAU,RPL6,RPL10A,RPL29,RPS7,RPL5,RPS18,RPS14,RPL30,RPL9,RPL13,RPL8,RPS5,RPSA,RPS24,RPL32,RPS25,RPS6,RPL41,RPS27,RPL17,RPS23,RPL4,RPS3,RPL22,RPLP2,RPS20,RPL37A,RPS19,UBA52,RPL14,RPL35,RPS8,RPS12,RPL12,RPL23,RPS15A,RPL36,RPL26,RPL2…
REAC	SARS-CoV-2-host interactions	REAC:R-HSA-9705683	3.18455e-05	4.49695	197	748	36	10790	RPS4Y1,RPS26,IFIH1,PTPN11,RPS16,RPS11,RPS3A,RPS27A,RPS13,RPS10,RPS15,RPS9,RPS28,FAU,RPS7,RPS18,RPS14,RPS5,RPSA,RPS24,RPS25,RPS6,RPS27,RPS23,RPS3,RPS20,RPS19,UBA52,RPS8,RPS12,RPS15A,RPS29,RPS4X,RPS17,RPS2,RPS21
REAC	Activation of kainate receptors upon glutamate binding	REAC:R-HSA-451326	0.00203224	2.69202	30	357	8	10790	GRIK2,NCALD,CALM1,PLCB1,GNG7,GNB3,GRIK1,GNGT2
REAC	SARS-CoV-2 Infection	REAC:R-HSA-9694516	0.0124031	1.90647	282	748	39	10790	ST3GAL1,RPS4Y1,FUT8,RPS26,IFIH1,PTPN11,NRP1,RPS16,RPS11,RPS3A,RPS27A,RPS13,RPS10,RPS15,RPS9,RPS28,FAU,RPS7,RPS18,RPS14,RPS5,RPSA,RPS24,RPS25,RPS6,RPS27,RPS23,RPS3,RPS20,RPS19,UBA52,RPS8,RPS12,RPS15A,RPS29,RPS4X,RPS17,RPS2,RPS21
REAC	Ionotropic activity of kainate receptors	REAC:R-HSA-451306	0.0352481	1.45286	10	93	3	10790	GRIK2,NCALD,CALM1
REAC	Activation of Ca-permeable Kainate Receptor	REAC:R-HSA-451308	0.0352481	1.45286	10	93	3	10790	GRIK2,NCALD,CALM1
REAC	Neuronal System	REAC:R-HSA-112316	0.0485221	1.31406	400	404	31	10790	GABRG3,GRIK2,NCALD,PRKCA,SLC1A3,SIPA1L1,KCNA2,KCNH8,NRG1,CALM1,SLC6A1,SLC6A11,MYO6,PLCB1,GNG7,LIN7A,NLGN1,KCNH7,NLGN4Y,GRIP2,NRXN3,GNB3,CACNA1B,SLC6A12,GRIK1,CPLX1,GNGT2,IL1RAPL1,GRIA4,RPS6KA3,MAOA
WP	Cytoplasmic ribosomal proteins	WP:WP477	1.39326e-74	73.856	88	748	81	8133	RPS4Y1,RPS26,RPS6KA3,RPL7,RPL10,RPS16,RPS11,RPL7A,RPL19,RPL13A,RPS3A,RPL3,RPS27A,RPLP0,RPL15,RPL11,RPLP1,RPL27A,RPS13,RPS10,RPL28,RPL18A,RPS15,RPS9,RPS28,RPL18,RPL24,FAU,RPL6,RPL10A,RPL29,RPS7,RPL5,RPS18,RPS14,RPL30,RPL9,RPL13,RPL8,RPS5,RPSA,RPS24,RPL32,RPS25,RPS6,RPL41,RPS27,RPL17,RPS23,RPL4,RPS3,RPL22,RPLP2,RPS20,RPL37A,RPS19,UBA52,RPL14,RPL35,RPS8,RPS12,RPL12,RPL23,RPS15A,RPL36,RPL26,RPL27,RPS…
WP	Vitamin A and carotenoid metabolism	WP:WP716	0.0340004	1.46852	42	54	4	8133	RARB,RLBP1,SCARB1,ALDH1A2
WP	Ganglio sphingolipid metabolism	WP:WP1423	0.0477747	1.3208	12	85	3	8133	ST3GAL1,ST8SIA5,ST8SIA1
TF	Factor: FPM315; motif: SRGGGAGGAGGN	TF:M01587	9.94722e-06	5.0023	3326	341	100	20011	DGKB,WIF1,DST,VIPR2,GRID2,SRGAP1,FABP7,PRSS35,GLIS3,LSAMP,NFIX,ST3GAL1,GALNT13,WNT5B,SCARB1,PRKCA,QDPR,CDH23,STK39,CGNL1,KLHL8,RHBDL3,ST8SIA1,KIF21A,SEMA5B,NRG1,HES5,SLC35D1,MAPK4,THSD7A,PLCE1,SLC6A1,HEY2,DUSP16,RGS7,HDAC9,SNX10,NR3C2,KIT,NEDD4L,MYO5B,CDON,DCLK1,ABI3BP,TMEM26,PLCB1,PAG1,UBE2D2,PCSK2,SV2B,SLC22A23,PLXDC2,EGR1,MPPED2,LIN7A,FOS,OSBPL10,RCVRN,ARHGAP42,BTG2,PCSK6,SRRM4,SEMA5A,PID1,EVA…
TF	Factor: Miz-1; motif: NNRGGWGGGGGAGGGGMRR	TF:M10112	0.0060169	2.22063	8711	56	42	20011	DGKB,WIF1,TF,FLT1,GABRG3,NFIB,CADM1,DST,LRRC4C,SLC35F1,RARB,SOX5,VIPR2,TNIK,CREB5,EPHA3,GRIK2,GRID2,SRGAP1,APBB2,PROX1,CNTN1,FAM110B,RLBP1,FRMD5,PRSS35,GLIS3,LSAMP,NFIX,ST3GAL1,GALNT13,WNT5B,COBL,NCALD,ST8SIA5,SCARB1,PCYT1B,QDPR,SEL1L3,ALDH1A2,CDH23,SLAIN1
TF	Factor: MAZ; motif: GGGGGAGGGGGNGRGRRRGNRG	TF:M09984	0.00832863	2.07943	9784	175	116	20011	DGKB,WIF1,TF,FLT1,GABRG3,NFIB,CADM1,DST,LRRC4C,SOX5,VIPR2,TNIK,GRIK2,GRID2,SRGAP1,APBB2,PROX1,CNTN1,FAM110B,RLBP1,FRMD5,HKDC1,PRSS35,GLIS3,STAC,LSAMP,NFIX,ST3GAL1,GALNT13,WNT5B,COBL,ARHGEF3,NCALD,ST8SIA5,SCARB1,PRKCA,SASH1,SEL1L3,CDH23,SLAIN1,LAMA1,PDGFC,KDM5B,RGR,STK39,SERINC5,F3,ATP2B2,UST,GUCY1A2,CGNL1,TRIM2,KLHL8,RHBDL3,DNER,NFIA,FGF13,KCNH8,ST8SIA1,KIF21A,SEMA5B,EPAS1,NRG1,RASGEF1B,LIMD1,CAL…
TF	Factor: ZNF142; motif: SNSCGCCCGCCCGCSCSS	TF:M12697	0.0236264	1.6266	3193	134	42	20011	WIF1,CADM1,DST,SAT1,VIPR2,FRMD5,PRSS35,LSAMP,GALNT13,COBL,PRKCA,SEL1L3,CDH23,LAMA1,HECW2,PDGFC,SERINC5,ATP2B2,GUCY1A2,RHBDL3,NFIA,FGF13,ST8SIA1,KIF21A,SEMA5B,EPAS1,LIMD1,ZC3HAV1,HES5,RHPN2,PLCE1,SLC6A11,HEY2,DUSP16,ITGB5,NR3C2,KIT,NEDD4L,MYO5B,CDON,RASD1,MTUS2
TF	Factor: GCMa:Erg; motif: ATGCGGGCGGAARKG; match class: 1	TF:M08487_1	0.0256571	1.59079	9009	140	89	20011	DGKB,WIF1,TF,GABRG3,CADM1,DST,SAT1,LRRC4C,RARB,VIPR2,TNIK,GRIK2,GRID2,SRGAP1,PROX1,FAM110B,RLBP1,FRMD5,PRSS35,STAC,LSAMP,NFIX,GALNT13,WNT5B,COBL,ST8SIA5,SCARB1,PRKCA,PCYT1B,SASH1,SLC1A3,SEL1L3,ALDH1A2,CDH23,SLAIN1,LAMA1,HECW2,PDGFC,KDM5B,PPP3CC,STK39,SERINC5,ATP2B2,UST,GUCY1A2,CGNL1,TRIM2,KLHL8,TRPM3,RHBDL3,DNER,NFIA,FGF13,ST8SIA1,KIF21A,SEMA5B,EPAS1,NRG1,CALM1,HES5,SLC35D1,MAPK4,RHPN2,PLCE1,SLC6…
TF	Factor: AP-3; motif: TKGAAAKN	TF:M04609	0.0300563	1.52206	4358	33	19	20011	DGKB,WIF1,GABRG3,NAV2,NFIB,DST,LRRC4C,SLC35F1,RARB,VIPR2,TNIK,EPHA3,GRIK2,CHL1,PROX1,CNTN1,FABP7,FRMD5,HKDC1
TF	Factor: Oct-4; motif: YWTTSTNATGCAAAT	TF:M01125	0.034044	1.46796	2054	52	17	20011	WIF1,TF,NFIB,CADM1,DST,SLC35F1,RARB,FRMD5,PRSS35,RASGRP1,GLIS3,WNT5B,NCALD,PCYT1B,QDPR,SASH1,SLC1A3
TF	Factor: ZNF383; motif: SSNGGGMGGNGSNGGS; match class: 1	TF:M12703_1	0.0381508	1.4185	4465	127	50	20011	GABRG3,CADM1,LRRC4C,TNIK,GRIK2,PROX1,FRMD5,NFIX,ST3GAL1,GALNT13,WNT5B,COBL,ARHGEF3,ST8SIA5,SCARB1,PRKCA,SEL1L3,SLAIN1,LAMA1,HECW2,PDGFC,STK39,SERINC5,F3,ATP2B2,UST,CGNL1,KLHL8,RHBDL3,DNER,NFIA,ST8SIA1,SEMA5B,NRG1,RASGEF1B,LIMD1,CALM1,SLC35D1,MAPK4,RHPN2,SLC15A3,HEY2,DUSP16,NR3C2,KIT,NEDD4L,GLT1D1,MYO5B,CDON,DCLK1
MIRNA	hsa-miR-100-5p	MIRNA:hsa-miR-100-5p	0.000939222	3.02723	249	750	32	14850	FLT1,SAT1,NFIA,RHPN2,TSC22D1,SGTB,DDAH1,RNF144B,GRHL1,PAPSS1,CCN1,HMGB1,RPL7,RPL10,RPL7A,RPL19,EEF1A1,RPL15,RPLP1,RPS15,RPL10A,RPL5,RPS27,ACTB,RPL14,RPS8,RPS15A,RPL26,RPL36A,RPL21,RPL31,SET
MIRNA	hsa-miR-181a-5p	MIRNA:hsa-miR-181a-5p	0.0288168	1.54035	550	178	19	14850	WIF1,SOX5,SRGAP1,CHL1,PROX1,SASH1,HECW2,SIPA1L1,TRIM2,HEY2,PLXDC2,NCOA7,EGR1,CPEB4,PDGFRA,GPD1L,RGS16,SPTLC3,FOS
MIRNA	hsa-miR-652-3p	MIRNA:hsa-miR-652-3p	0.0446472	1.35021	161	800	22	14850	SAT1,LRRC1,ZEB1,HMGB1,RPS16,EEF1A1,RPL18A,BTF3,RPL29,RPL32,RPS6,RPL4,RPS19,RPL26,RPL27,RPS29,RPL35A,ACTG1,RPL21,DOCK11,SLC12A6,RNF152
HPA	retina; photoreceptor cells[‚â•Low]	HPA:0411271	0.000409592	3.38765	78	554	16	11006	RARB,RLBP1,RCVRN,PDC,RP1,AIPL1,NRL,PDE6H,GNGT2,CFAP161,ROM1,GNAT1,CRX,IMPG2,RBP3,PRPH2
HPA	retina; photoreceptor cells[High]	HPA:0411273	0.00116849	2.93238	57	554	13	11006	RARB,RCVRN,PDC,AIPL1,NRL,PDE6H,GNGT2,ROM1,GNAT1,CRX,IMPG2,RBP3,PRPH2
HPA	retina	HPA:0410000	0.00311699	2.50627	111	554	18	11006	RARB,RLBP1,RCVRN,NPVF,PDC,RP1,AIPL1,NRL,PDE6H,GNGT2,CFAP161,ROM1,CABP5,GNAT1,CRX,IMPG2,RBP3,PRPH2
HPA	cerebellum; molecular layer - neuropil[‚â•Medium]	HPA:0090992	0.0043734	2.35918	146	109	9	11006	CHL1,CNTN1,FABP7,PRKCA,SLC1A3,TRIM2,KCNA2,SLC6A1,RGS7
HPA	retina; photoreceptor cells[‚â•Medium]	HPA:0411272	0.00504352	2.29727	74	554	14	11006	RARB,RCVRN,PDC,AIPL1,NRL,PDE6H,GNGT2,CFAP161,ROM1,GNAT1,CRX,IMPG2,RBP3,PRPH2
HPA	cerebellum; molecular layer - neuropil[High]	HPA:0090993	0.0337422	1.47183	35	151	5	11006	CHL1,CNTN1,SLC1A3,SLC6A1,SV2B
CORUM	Ribosome, cytoplasmic	CORUM:306	4.74168e-48	47.3241	74	748	74	3383	RPS4Y1,RPS26,RPL10,RPS16,RPS11,RPL7A,RPL19,RPL13A,RPS3A,RPL3,RPS27A,RPLP0,RPL15,RPL11,RPLP1,RPL27A,RPS13,RPS10,RPL28,RPL18A,RPS15,RPS9,RPS28,RPL18,RPL24,FAU,RPL6,RPL10A,RPL29,RPS7,RPL5,RPS18,RPS14,RPL30,RPL9,RPL8,RPS5,RPSA,RPS24,RPL32,RPS25,RPS6,RPL41,RPS27,RPL17,RPS23,RPL4,RPS3,RPL22,RPLP2,RPS20,RPL37A,RPS19,UBA52,RPL14,RPL35,RPS8,RPL23,RPS15A,RPL36,RPL26,RPL27,RPS29,RPS4X,RPL38,RPL23A,RPL36A,RP…
CORUM	60S ribosomal subunit, cytoplasmic	CORUM:308	1.66397e-27	26.7789	43	724	43	3383	RPL10,RPL7A,RPL19,RPL13A,RPL3,RPLP0,RPL15,RPL11,RPLP1,RPL27A,RPL28,RPL18A,RPL18,RPL24,RPL6,RPL10A,RPL29,RPL5,RPL30,RPL9,RPL8,RPL32,RPL41,RPL17,RPL4,RPL22,RPLP2,RPL37A,UBA52,RPL14,RPL35,RPL23,RPL36,RPL26,RPL27,RPL38,RPL23A,RPL36A,RPL21,RPL34,RPL31,RPL37,RPL39
CORUM	40S ribosomal subunit, cytoplasmic	CORUM:305	8.26578e-19	18.0827	31	748	31	3383	RPS4Y1,RPS26,RPS16,RPS11,RPS3A,RPS27A,RPS13,RPS10,RPS15,RPS9,RPS28,FAU,RPS7,RPS18,RPS14,RPS5,RPSA,RPS24,RPS25,RPS6,RPS27,RPS23,RPS3,RPS20,RPS19,RPS8,RPS15A,RPS29,RPS4X,RPS17,RPS21
CORUM	40S ribosomal subunit, cytoplasmic	CORUM:338	1.80064e-17	16.7446	29	748	29	3383	RPS26,RPS16,RPS11,RPS3A,RPS27A,RPS13,RPS10,RPS15,RPS9,RPS28,FAU,RPS7,RPS18,RPS14,RPS5,RPSA,RPS24,RPS25,RPS6,RPS23,RPS3,RPS20,RPS19,RPS8,RPS15A,RPS29,RPS4X,RPS17,RPS21
CORUM	Nop56p-associated pre-rRNA complex	CORUM:3055	5.37556e-14	13.2696	93	724	56	3383	RPL10,RPS16,RPS11,RPL7A,RPL19,RPL13A,EEF1A1,RPS3A,RPL3,RPLP0,RPL15,RPL11,RPLP1,RPL27A,RPS13,RPL28,RPL18A,RPS15,RPS9,RPL18,RPL24,RPL6,RPL10A,RPL29,RPS7,RPL5,RPS18,RPS14,RPL30,RPL9,RPL8,RPS24,RPL32,RPS6,RPL17,RPS23,RPL4,RPL22,RPLP2,RPL37A,RPL14,RPL35,RPS8,RPL23,RPS15A,RPL36,RPL26,RPL27,RPS29,HNRNPA1,RPL23A,RPL36A,RPL21,RPL31,RPS17,RPL39
CORUM	TRBP containing complex (DICER, RPL7A, EIF6, MOV10 and subunits of the 60S ribosomal particle)	CORUM:5380	1.93588e-06	5.71312	21	713	17	3383	RPL7A,RPL19,RPL15,RPL11,RPLP1,RPL28,RPL18A,RPL10A,RPL30,RPL32,RPLP2,RPL37A,RPL14,RPL36,RPL27,RPL21,RPL34
HP	Erythroid hypoplasia	HP:0012133	4.31774e-12	11.3647	28	716	23	4851	RPS26,TET2,HEATR3,RPL15,RPL11,RPS10,RPS28,RPL18,RPS7,RPL5,RPS14,RPS24,RPS27,RPS20,RPS19,RPL35,RPS15A,RPL26,RPL27,RPS29,RPL35A,RPL31,RPS17
HP	Abnormal radial artery morphology	HP:0031640	3.51512e-11	10.4541	23	716	20	4851	RPS26,RPL15,RPL11,RPS10,RPS28,RPL18,RPS7,RPL5,RPS24,RPS27,RPS20,RPS19,RPL35,RPS15A,RPL26,RPL27,RPS29,RPL35A,RPL31,RPS17
HP	Radial artery aplasia	HP:0020118	3.51512e-11	10.4541	23	716	20	4851	RPS26,RPL15,RPL11,RPS10,RPS28,RPL18,RPS7,RPL5,RPS24,RPS27,RPS20,RPS19,RPL35,RPS15A,RPL26,RPL27,RPS29,RPL35A,RPL31,RPS17
HP	Elevated red cell adenosine deaminase level	HP:0030270	3.51512e-11	10.4541	23	716	20	4851	RPS26,RPL15,RPL11,RPS10,RPS28,RPL18,RPS7,RPL5,RPS24,RPS27,RPS20,RPS19,RPL35,RPS15A,RPL26,RPL27,RPS29,RPL35A,RPL31,RPS17
HP	Macrocytic dyserythropoietic anemia	HP:0005532	7.85154e-10	9.10504	25	716	20	4851	RPS26,RPL15,RPL11,RPS10,RPS28,RPL18,RPS7,RPL5,RPS24,RPS27,RPS20,RPS19,RPL35,RPS15A,RPL26,RPL27,RPS29,RPL35A,RPL31,RPS17
HP	Pure red cell aplasia	HP:0012410	2.93591e-09	8.53226	26	716	20	4851	RPS26,RPL15,RPL11,RPS10,RPS28,RPL18,RPS7,RPL5,RPS24,RPS27,RPS20,RPS19,RPL35,RPS15A,RPL26,RPL27,RPS29,RPL35A,RPL31,RPS17
HP	Malignant genitourinary tract tumor	HP:0006758	9.77212e-09	8.01001	27	716	20	4851	RPS26,RPL15,RPL11,RPS10,RPS28,RPL18,RPS7,RPL5,RPS24,RPS27,RPS20,RPS19,RPL35,RPS15A,RPL26,RPL27,RPS29,RPL35A,RPL31,RPS17
HP	Normochromic anemia	HP:0001895	1.38516e-07	6.8585	35	716	22	4851	KIT,RPS26,TET2,RPL15,RPL11,RPS10,RPS28,RPL18,RPS7,RPL5,RPS24,RPS27,RPS20,RPS19,RPL35,RPS15A,RPL26,RPL27,RPS29,RPL35A,RPL31,RPS17
HP	Adenocarcinoma of the colon	HP:0040276	5.16845e-07	6.28664	31	716	20	4851	RPS26,RPL15,RPL11,RPS10,RPS28,RPL18,RPS7,RPL5,RPS24,RPS27,RPS20,RPS19,RPL35,RPS15A,RPL26,RPL27,RPS29,RPL35A,RPL31,RPS17
HP	Abnormality of the thenar eminence	HP:0001227	1.18955e-06	5.92462	32	716	20	4851	RPS26,RPL15,RPL11,RPS10,RPS28,RPL18,RPS7,RPL5,RPS24,RPS27,RPS20,RPS19,RPL35,RPS15A,RPL26,RPL27,RPS29,RPL35A,RPL31,RPS17
HP	Osteosarcoma	HP:0002669	1.30813e-06	5.88335	35	716	21	4851	RPS26,HEATR3,RPL15,RPL11,RPS10,RPS28,RPL18,RPS7,RPL5,RPS24,RPS27,RPS20,RPS19,RPL35,RPS15A,RPL26,RPL27,RPS29,RPL35A,RPL31,RPS17
HP	Abnormal number of erythroid precursors	HP:0012131	2.23138e-06	5.65143	45	716	24	4851	RPS26,ERBB3,TET2,HEATR3,RPL15,RPL11,RPS10,RPS28,RPL18,RPS7,RPL5,RPS14,RPS24,RPS27,RPS20,RPS19,RPL35,RPS15A,RPL26,RPL27,RPS29,RPL35A,RPL31,RPS17
HP	Persistence of hemoglobin F	HP:0011904	2.60627e-06	5.58398	33	716	20	4851	RPS26,RPL15,RPL11,RPS10,RPS28,RPL18,RPS7,RPL5,RPS24,RPS27,RPS20,RPS19,RPL35,RPS15A,RPL26,RPL27,RPS29,RPL35A,RPL31,RPS17
HP	Abnormal erythrocyte enzyme level	HP:0030272	2.60627e-06	5.58398	33	716	20	4851	RPS26,RPL15,RPL11,RPS10,RPS28,RPL18,RPS7,RPL5,RPS24,RPS27,RPS20,RPS19,RPL35,RPS15A,RPL26,RPL27,RPS29,RPL35A,RPL31,RPS17
HP	Reticulocytopenia	HP:0001896	5.46327e-06	5.26255	34	716	20	4851	RPS26,RPL15,RPL11,RPS10,RPS28,RPL18,RPS7,RPL5,RPS24,RPS27,RPS20,RPS19,RPL35,RPS15A,RPL26,RPL27,RPS29,RPL35A,RPL31,RPS17
HP	Adenocarcinoma of the large intestine	HP:0040275	1.10035e-05	4.95847	35	716	20	4851	RPS26,RPL15,RPL11,RPS10,RPS28,RPL18,RPS7,RPL5,RPS24,RPS27,RPS20,RPS19,RPL35,RPS15A,RPL26,RPL27,RPS29,RPL35A,RPL31,RPS17
HP	Partial duplication of thumb phalanx	HP:0009944	7.31778e-05	4.13562	38	716	20	4851	RPS26,RPL15,RPL11,RPS10,RPS28,RPL18,RPS7,RPL5,RPS24,RPS27,RPS20,RPS19,RPL35,RPS15A,RPL26,RPL27,RPS29,RPL35A,RPL31,RPS17
HP	Adenocarcinoma of the intestines	HP:0040273	0.000129676	3.88714	39	716	20	4851	RPS26,RPL15,RPL11,RPS10,RPS28,RPL18,RPS7,RPL5,RPS24,RPS27,RPS20,RPS19,RPL35,RPS15A,RPL26,RPL27,RPS29,RPL35A,RPL31,RPS17
HP	Partial duplication of the phalanx of hand	HP:0009999	0.000223913	3.64992	40	716	20	4851	RPS26,RPL15,RPL11,RPS10,RPS28,RPL18,RPS7,RPL5,RPS24,RPS27,RPS20,RPS19,RPL35,RPS15A,RPL26,RPL27,RPS29,RPL35A,RPL31,RPS17
HP	Increased mean corpuscular volume	HP:0005518	0.000488138	3.31146	45	716	21	4851	RPS26,SAMD9L,RPL15,RPL11,RPS10,RPS28,RPL18,RPS7,RPL5,RPS24,RPS27,RPS20,RPS19,RPL35,RPS15A,RPL26,RPL27,RPS29,RPL35A,RPL31,RPS17
HP	Absent thumb	HP:0009777	0.00513714	2.28928	50	725	21	4851	RPS26,RPL15,RPL11,RPS10,RPS28,RPL18,RPS7,RPL5,RPS24,RPS27,RPS20,RPS19,RPL35,RPS15A,RPL26,RPL27,RPS29,RPL35A,RPL31,RPS17,FGF10
HP	Duplication of thumb phalanx	HP:0009942	0.00575083	2.24027	58	725	23	4851	RPS26,RPL15,RPL11,RPS10,RPS28,RPL18,RPS7,RPL5,RPS24,RPS27,ACTB,RPS20,RPS19,RPL35,RPS15A,RPL26,RPL27,RPS29,RPL35A,ACTG1,RPL31,RPS17,FGF10
HP	Thrombocytosis	HP:0001894	0.00652929	2.18513	59	716	23	4851	RPS26,TET2,RPL15,RPL11,RPS10,RPS28,RPL18,RPS7,RPL5,RPS14,RPSA,RPS24,RPS27,RPS20,RPS19,RPL35,RPS15A,RPL26,RPL27,RPS29,RPL35A,RPL31,RPS17
HP	Nonimmune hydrops fetalis	HP:0001790	0.00888244	2.05147	52	716	21	4851	SLC35D1,RPS26,RPL15,RPL11,RPS10,RPS28,RPL18,RPS7,RPL5,RPS24,RPS27,RPS20,RPS19,RPL35,RPS15A,RPL26,RPL27,RPS29,RPL35A,RPL31,RPS17
HP	Acute myeloid leukemia	HP:0004808	0.0117656	1.92938	69	716	25	4851	KIT,RPS26,SAMD9L,ERBB3,TET2,RPL15,RPL11,RPS10,RPS28,RPL18,RPS7,RPL5,RPS14,RPS24,RPS27,RPS20,RPS19,RPL35,RPS15A,RPL26,RPL27,RPS29,RPL35A,RPL31,RPS17
HP	Sprengel anomaly	HP:0000912	0.0127043	1.89605	53	716	21	4851	RPS26,PTPN11,RPL15,RPL11,RPS10,RPS28,RPL18,RPS7,RPL5,RPS24,RPS27,RPS20,RPS19,RPL35,RPS15A,RPL26,RPL27,RPS29,RPL35A,RPL31,RPS17
HP	Abnormal mean corpuscular volume	HP:0025065	0.0179532	1.74586	54	716	21	4851	RPS26,SAMD9L,RPL15,RPL11,RPS10,RPS28,RPL18,RPS7,RPL5,RPS24,RPS27,RPS20,RPS19,RPL35,RPS15A,RPL26,RPL27,RPS29,RPL35A,RPL31,RPS17
