# Supplementary material for: Single Cell Multiome Atlas of the Human Developing Retina
Source: Research Square preprint supplement (doi:10.21203/rs.3.rs-3417373/v1), 2023-10-11
Supplement: Supplementary file 6 [file c7df2e8bdafa3f039654bc72.xlsx]

## Sheet: Sheet1
Name	Cell Fate Determination Function	Positive Regulation Cell Fate	Negative Regulation Cell Fate	Animal Model	Validation Method	PMID
ATOH7	TRUE	RGC	NA	Mouse	Cre recombinase	33712461
BACH2	Unknown	NA	NA	NA	NA	NA
CREB5	Unknown	NA	NA	NA	NA	NA
CRX	TRUE	Rod,Cone	NA	Mouse	Deleted a restriction fragment encoding the homeodomain.	10581037
CUX2	Unknown	NA	NA	NA	NA	NA
E2F8	Unknown	NA	NA	NA	NA	NA
EBF1	TRUE	NA	MG	Mouse	Homologous recombination	21971554
EBF2	TRUE	NA	MG	Mouse	Homologous recombination	21971554
EBF3	TRUE	NA	MG	Mouse	Homologous recombination	21971554
EGR1	TRUE	AC,HC	NA	Zebrafish	Morpholino	23405257
EPAS1	Unknown	NA	NA	NA	NA	NA
ESRRB	Unknown	NA	NA	NA	NA	NA
ESRRG	Unknown	NA	NA	NA	NA	NA
ETV5	Unknown	NA	NA	NA	NA	NA
FOS	Unknown	NA	NA	NA	NA	NA
FOXN4	TRUE	Rod,Cone,AC,HC	RGC	Mouse	Foxn4 lacZ/lacZ embryos	32071204
FOXP1	TRUE	RGC,Cone,HC,AC	AC,Rod,BC,MG	Mouse	Crossing Six3-Cre mice with Foxp1-floxed mice.	36924502
GLI2	TRUE	MG,BC	NA	Mouse	Gli2-/- mice explants	19124651
GLI3	Unknown	NA	NA	NA	NA	NA
GLIS3	Unknown	NA	NA	NA	NA	NA
HES1	TRUE	Cone	RGC	Mouse	Hes1 conditional KO	31949107
HES4	TRUE	Rod,Cone	NA	Zebrafish	CRISPR	32647335
HES5	TRUE	MG	NA	Mouse	Hes5-mutant	10821751
HES6	TRUE	Rod	NA	Mouse	retrovirus CLIG	10851137
HEY1	Unknown	NA	NA	NA	NA	NA
HIF3A	Unknown	NA	NA	NA	NA	NA
HIVEP3	Unknown	NA	NA	NA	NA	NA
HMGA2	Unknown	NA	NA	NA	NA	NA
HMGB2	Unknown	NA	NA	NA	NA	NA
ID3	TRUE	MG	NA	Mouse	RNA interference	23824579
ISL1	TRUE	BC,AC,RGC	NA	Mouse	Targeting construct in which exon 2 of Isl1 was flanked by two loxP sequences	18003851
JAZF1	Unknown	NA	NA	NA	NA	NA
KLF7	TRUE	RGC	NA	H9 human ESCs	shRNA	34584087
LHX1	Unknown	NA	NA	NA	NA	NA
LHX4	TRUE	BC	NA	Mouse	Conditional knockout and tdTomato knock-in	32937137
MEF2C	TRUE	Cone	NA	iPSC Organoids	The patient mutation (NRL c.233dup(C),p.(L75Pfs19X)) was confirmed in iPSCs and organoids by PCR amplifying a 770 nt genomic region surrounding the duplication with F-5'-TCCCTGCTCCTGGTTC-3' and R-5'-CACCATCCCTCTGGCTTTCC-3' followed by Sanger sequencing (University of Wisconsin Biotech Center, Madison, WI) with the F primer.	32081919
MEIS2	Unknown	NA	NA	NA	NA	NA
MITF	Unknown	NA	NA	NA	NA	NA
MYB	Unknown	NA	NA	NA	NA	NA
MYBL1	Unknown	NA	NA	NA	NA	NA
MYT1L	TRUE	NA	MG	NA	NA	https://iovs.arvojournals.org/article.aspx?articleid=2783268
NEUROD1	TRUE	Rod,Cone	NA	Mouse	Mice expressing Cre recombinase under the control of the Crx 2-kb promoter were crossed with the NeuroD1 flox mouse line, in which the second exon of the NeuroD1 gene is flanked by two loxP sites.	22784109
NEUROD4	TRUE	Rod,Cone	RGC,MG	Mouse	Triple mutant	15105417
NFIA	TRUE	BC,MG	NA	Mouse	Nfia lox/lox; Nfia lox/lox, and Nfix lox/lox mice were crossed to Chx10-Cre-GFP	31128945
NFIB	TRUE	BC,MG	NA	Mouse	Nfia lox/lox; Nfia lox/lox, and Nfix lox/lox mice were crossed to Chx10-Cre-GFP	31128945
NFIC	TRUE	BC,MG	NA	Mouse	Nfia lox/lox; Nfia lox/lox, and Nfix lox/lox mice were crossed to Chx10-Cre-GFP	31128945
NFIX	TRUE	BC,MG	NA	Mouse	Nfia lox/lox; Nfia lox/lox, and Nfix lox/lox mice were crossed to Chx10-Cre-GFP	31128945
NR2E1	TRUE	NA	AC,Cone	Mouse	Crossing Nr2e1 frc/+ heterozygote females	26092486
NR2E3	TRUE	Rod	Cone	Patients	Normal subjects and patients with ESCS caused by NR2E3 mutations were included in the study.	18547563
NR3C2	Unknown	NA	NA	NA	NA	NA
NR4A1	Unknown	NA	NA	NA	NA	NA
NRL	TRUE	Rod	Cone	iPSC Organoids	The patient mutation (NRL c.233dup(C),p.(L75Pfs19X)) was confirmed in iPSCs and organoids by PCR amplifying a 770 nt genomic region surrounding the duplication with F-5'-TCCCTGCTCCTGGTTC-3' and R-5'-CACCATCCCTCTGGCTTTCC-3' followed by Sanger sequencing (University of Wisconsin Biotech Center, Madison, WI) with the F primer.	32081919
ONECUT1	TRUE	HC,RGC,Cone,AC,Rod	NA	Mouse	Using recombineering, a targeting construct was generated by inserting a loxP site upstream of the transcription start site and a loxP-FRT-Neo-FRT cassette in the first intron of Oc2	25228773
ONECUT2	TRUE	HC,RGC,Cone,AC,Rod	NA	Mouse	Using recombineering, a targeting construct was generated by inserting a loxP site upstream of the transcription start site and a loxP-FRT-Neo-FRT cassette in the first intron of Oc2	25228773
ONECUT3	Unknown	NA	NA	NA	NA	NA
OTX2	TRUE	BC,Rod,Cone	NA	Mouse	Otx2 flox/flox	17908793
PBX3	Unknown	NA	NA	NA	NA	NA
PBX4	Unknown	NA	NA	NA	NA	NA
POU2F2	TRUE	Cone	NA	Mouse	CRISPR-Cas9 gRNAs targeting Pou2f1 and Pou2f2	32878923
POU4F2	TRUE	RGC	NA	Mouse	Recombineering	25775587
POU6F2	Unknown	NA	NA	NA	NA	NA
PPARA	Unknown	NA	NA	NA	NA	NA
PRDM1	TRUE	Cone,Rod	BC	Mouse	LoxP-STOP-LoxP sequence	32562755
PRDM13	TRUE	AC	NA	Mouse	Prdm13 flox mouse	25995483
PRDM8	TRUE	BC,AC	NA	Mouse	The Prdm8 mutant allele was generated by partially replacing the Prdm8 coding region with a reporter/selection cassette (IRES-EGFPnls/DTA-Neo)	26023183
PROX1	TRUE	HC	NA	Mouse	A B-galactosidase-neomycin resistance cassette was fused in frame to the N-terminal part of Prox1.	12692551
PTF1A	TRUE	AC,HC	NA	Mouse	Ptf1a Cre mutant mice have a knock-in Ptf1a null allele, where the Ptf1a-coding region is replaced by Cre-recombinase.	17075007
RARB	TRUE	RGC	NA	Mouse	Isoform gene targeting	11723443
RAX2	Unknown	NA	NA	NA	NA	NA
RREB1	Unknown	NA	NA	NA	NA	NA
RUNX1	Unknown	NA	NA	NA	NA	NA
RXRG	Unknown	NA	NA	NA	NA	NA
SKOR2	Unknown	NA	NA	NA	NA	NA
SMAD6	Unknown	NA	NA	NA	NA	NA
SMAD9	Unknown	NA	NA	NA	NA	NA
SOX2	TRUE	AC	NA	Mouse	SOX2i	33422527
SOX6	Unknown	NA	NA	NA	NA	NA
SP8	Unknown	NA	NA	NA	NA	NA
ST18	Unknown	NA	NA	NA	NA	NA
TCF7L1	Unknown	NA	NA	NA	NA	NA
TFAP2A	TRUE	AC,HC	NA	Mouse	Ptf1a-cre	25966682
TFAP2B	TRUE	AC,HC	NA	Mouse	Ptf1a-cre	25966682
THRB	TRUE	Cone	NA	Mouse	We used a linker to introduce a KpnI site at a StuI site in the TrB2 exon, allowing the in-frame insertion of a lacZ-neo cassette.	11138006
TSHZ2	Unknown	NA	NA	NA	NA	NA
VSX1	TRUE	BC	NA	Mouse	Knock-in null mutant allele	21917795
VSX2	TRUE	BC	NA	Mouse	CRISPR-Cas9	35017532
ZBTB16	Unknown	NA	NA	NA	NA	NA
ZBTB38	Unknown	NA	NA	NA	NA	NA
ZBTB7C	Unknown	NA	NA	NA	NA	NA
ZFHX3	Unknown	NA	NA	NA	NA	NA
ZFPM2	Unknown	NA	NA	NA	NA	NA
ZNF521	Unknown	NA	NA	NA	NA	NA
ZNF536	Unknown	NA	NA	NA	NA	NA
ZNF704	Unknown	NA	NA	NA	NA	NA
ZNF83	Unknown	NA	NA	NA	NA	NA
