# Supplementary material for: Single Cell Multiome Atlas of the Human Developing Retina
Source: Research Square preprint supplement (doi:10.21203/rs.3.rs-3417373/v1), 2023-10-11
Supplement: Supplementary file 7 [file cca0f661c22f144b76210c85.xlsx]

## Sheet: Sheet1
TF Name	Predicted Cell Specificaiton Function
ATOH7	Cone
BACH2	HC
CREB5	Rod
CRX	Rod
CUX2	Rod
E2F8	RGC
EBF1	RGC
EBF2	RGC
EBF3	RGC
EGR1	BC
EPAS1	Rod
ESRRB	HC
ESRRG	HC
ETV5	Rod
FOS	BC
FOXN4	RGC
FOXP1	RGC
GLI2	Rod
GLI3	Rod
GLIS3	Rod
HES1	Rod
HES4	Rod
HES5	Rod
HES6	AC
HEY1	RGC
HIF3A	BC
HIVEP3	HC
HMGA2	Rod
HMGB2	Rod
ID3	Rod
ISL1	RGC
JAZF1	Rod
KLF7	RGC
LHX1	HC
LHX4	Cone
MEF2C	BC
MEIS2	Cone
MITF	BC
MYB	Rod
MYBL1	Cone
MYT1L	HC
NEUROD1	Cone
NEUROD4	Cone
NFIA	BC
NFIB	BC
NFIC	BC
NFIX	Rod
NR2E1	Rod
NR2E3	Rod
NR3C2	Rod
NR4A1	BC
NRL	Rod
ONECUT1	HC
ONECUT2	HC
ONECUT3	HC
OTX2	Cone
PBX3	RGC
PBX4	Cone
POU2F2	RGC
POU4F2	RGC
POU6F2	RGC
PPARA	Rod
PRDM1	Cone
PRDM13	AC
PRDM8	BC
PROX1	BC
PTF1A	AC
RARB	BC
RAX2	Rod
RREB1	Rod
RUNX1	Cone
RXRG	Cone
SKOR2	BC
SMAD6	Rod
SMAD9	RGC
SOX2	Rod
SOX6	BC
SP8	RGC
ST18	AC
TCF7L1	Rod
TFAP2A	HC
TFAP2B	HC
THRB	Cone
TSHZ2	HC
VSX1	BC
VSX2	BC
ZBTB16	RGC
ZBTB38	BC
ZBTB7C	Rod
ZFHX3	HC
ZFPM2	HC
ZNF521	HC
ZNF536	Rod
ZNF704	Rod
ZNF83	Cone
