# Supplementary material for: Single Cell Multiome Atlas of the Human Developing Retina
Source: Research Square preprint supplement (doi:10.21203/rs.3.rs-3417373/v1), 2023-10-11
Supplement: Supplementary file 8 [file d56e381a6161b23b1fafcb0f.xlsx]

## Sheet: PRPC GRN
tf	target	region
CREB5	PLCB1	chr20-8037983-8039061
CREB5	PLCB1	chr20-8473244-8474235
CREB5	PLCB1	chr20-8709546-8710421
CREB5	PLCB1	chr20-8753317-8754346
CREB5	PLCB1	chr20-8790262-8791117
CREB5	PLCB1	chr20-8861912-8862866
CREB5	SPTLC3	chr20-12923459-12924731
CREB5	SPTLC3	chr20-12969956-12971071
CREB5	SPTLC3	chr20-13009494-13010495
CREB5	KIF16B	chr20-16244843-16245202
CREB5	KIF16B	chr20-16260780-16261777
CREB5	KIF16B	chr20-16363465-16364472
CREB5	KIF16B	chr20-16644594-16645503
CREB5	PCSK2	chr20-17172639-17173629
CREB5	PCSK2	chr20-17226380-17226990
CREB5	PCSK2	chr20-17349974-17350976
CREB5	PCSK2	chr20-17399146-17400026
CREB5	PCSK2	chr20-17466825-17467744
CREB5	TSHZ2	chr20-52918742-52920848
CREB5	TSHZ2	chr20-52963762-52964733
CREB5	TSHZ2	chr20-53162145-53162991
CREB5	TSHZ2	chr20-53412365-53413492
CREB5	TSHZ2	chr20-53419412-53420414
CREB5	TSHZ2	chr20-53467776-53468756
CREB5	CDH4	chr20-61185963-61186744
CREB5	CDH4	chr20-61289136-61289771
CREB5	CDH4	chr20-61339827-61340794
CREB5	CDH4	chr20-61382630-61383168
CREB5	CDH4	chr20-61477368-61478671
CREB5	CDH4	chr20-61698677-61700455
CREB5	CDH4	chr20-61705225-61706271
CREB5	CDH4	chr20-61809195-61810084
CREB5	CDH4	chr20-61828906-61830956
CREB5	CDH4	chr20-61869633-61870583
CREB5	CDH4	chr20-61886098-61887763
CREB5	KAZN	chr1-13808570-13809505
CREB5	KAZN	chr1-13877421-13878653
CREB5	KAZN	chr1-14108322-14109358
CREB5	KAZN	chr1-14263016-14264023
CREB5	KAZN	chr1-14305353-14306166
CREB5	KAZN	chr1-14364850-14365650
CREB5	KAZN	chr1-14539750-14540684
CREB5	KAZN	chr1-14686468-14687394
CREB5	KAZN	chr1-14699327-14700306
CREB5	KAZN	chr1-14841146-14842057
CREB5	KAZN	chr1-14913475-14914461
CREB5	KAZN	chr1-14935554-14936209
CREB5	KAZN	chr1-14941584-14942840
CREB5	KAZN	chr1-15027316-15028514
CREB5	IFFO2	chr1-18921801-18925203
CREB5	IFFO2	chr1-18944385-18946197
CREB5	IFFO2	chr1-18953866-18955667
CREB5	MAN1C1	chr1-25568887-25570586
CREB5	MAN1C1	chr1-25572447-25574850
CREB5	MAN1C1	chr1-25640696-25641687
CREB5	MAN1C1	chr1-25690262-25691057
CREB5	MAN1C1	chr1-25765001-25766295
CREB5	CSMD2	chr1-33431053-33431872
CREB5	CSMD2	chr1-33712007-33713647
CREB5	CSMD2	chr1-33717870-33718819
CREB5	CSMD2	chr1-33719124-33720015
CREB5	CSMD2	chr1-33960823-33961437
CREB5	CSMD2	chr1-34025511-34026466
CREB5	CSMD2	chr1-34052300-34053315
CREB5	AGBL4	chr1-48462488-48463478
CREB5	AGBL4	chr1-48472209-48473034
CREB5	AGBL4	chr1-48480334-48481186
CREB5	AGBL4	chr1-48525758-48526837
CREB5	AGBL4	chr1-48681403-48682441
CREB5	AGBL4	chr1-48831315-48832406
CREB5	AGBL4	chr1-48870158-48871202
CREB5	AGBL4	chr1-48871289-48871957
CREB5	AGBL4	chr1-48917678-48918634
CREB5	AGBL4	chr1-49204627-49205513
CREB5	PLPP3	chr1-56564977-56567681
CREB5	PRKAA2	chr1-56564977-56567681
CREB5	HOOK1	chr1-59747231-59748383
CREB5	HOOK1	chr1-59804651-59806140
CREB5	NFIA	chr1-60903276-60904216
CREB5	NFIA	chr1-60930782-60931805
CREB5	NFIA	chr1-61196408-61197416
CREB5	NFIA	chr1-61271099-61272007
CREB5	NFIA	chr1-61426557-61427088
CREB5	NFIA	chr1-61441562-61442379
CREB5	NFIA	chr1-61452378-61454040
CREB5	SLC35D1	chr1-67019738-67020368
CREB5	SLC44A5	chr1-75203834-75204319
CREB5	SLC44A5	chr1-75234337-75235415
CREB5	SLC44A5	chr1-75274718-75274957
CREB5	SLC44A5	chr1-75632060-75633186
CREB5	DDAH1	chr1-85343971-85344819
CREB5	DDAH1	chr1-85369768-85370778
CREB5	DDAH1	chr1-85406901-85407844
CREB5	DDAH1	chr1-85611516-85612520
CREB5	F3	chr1-94527111-94529161
CREB5	DPYD	chr1-96978203-96981051
CREB5	DPYD	chr1-96984058-96985030
CREB5	DPYD	chr1-97063121-97064832
CREB5	DPYD	chr1-97239801-97240851
CREB5	DPYD	chr1-97243654-97244728
CREB5	DPYD	chr1-97305811-97306176
CREB5	DPYD	chr1-97373073-97373560
CREB5	DPYD	chr1-97427302-97428121
CREB5	DPYD	chr1-97558965-97559987
CREB5	DPYD	chr1-97625309-97626211
CREB5	DPYD	chr1-97826539-97827447
CREB5	DPYD	chr1-97836968-97837839
CREB5	PALMD	chr1-99662685-99663593
CREB5	COL11A1	chr1-102800114-102801082
CREB5	COL11A1	chr1-103125408-103126385
CREB5	KCNA2	chr1-110494334-110497042
CREB5	KCNA2	chr1-110503971-110504812
CREB5	KCNA2	chr1-110552003-110552847
CREB5	KCNA2	chr1-110612069-110612259
CREB5	KCNA2	chr1-110671701-110672464
CREB5	MAGI3	chr1-113388253-113390748
CREB5	MAGI3	chr1-113415049-113416028
CREB5	MAGI3	chr1-113416459-113417819
CREB5	MAGI3	chr1-113509747-113510532
CREB5	MAGI3	chr1-113650571-113651013
CREB5	MAGI3	chr1-113652468-113653829
CREB5	SPAG17	chr1-117892398-117893312
CREB5	SPAG17	chr1-117970119-117970938
CREB5	SPAG17	chr1-118160815-118161736
CREB5	SPAG17	chr1-118210399-118211265
CREB5	SPAG17	chr1-118252513-118254261
CREB5	C1orf61	chr1-156421810-156423220
CREB5	C1orf61	chr1-156504019-156506232
CREB5	MPZ	chr1-161381936-161382816
CREB5	MPZ	chr1-161399913-161400933
CREB5	RGS16	chr1-182616630-182618717
CREB5	RGS16	chr1-182633293-182635526
CREB5	KCNT2	chr1-196141887-196142809
CREB5	KCNT2	chr1-196546083-196546959
CREB5	ASPM	chr1-197197169-197198111
CREB5	ASPM	chr1-197226145-197227222
CREB5	KDM5B	chr1-202681154-202682245
CREB5	KDM5B	chr1-202685618-202686114
CREB5	KDM5B	chr1-202795915-202799626
CREB5	BTG2	chr1-203263061-203264850
CREB5	BTG2	chr1-203272810-203273375
CREB5	PLEKHA6	chr1-204152004-204153152
CREB5	PLEKHA6	chr1-204190798-204192221
CREB5	PLEKHA6	chr1-204275009-204275901
CREB5	PLEKHA6	chr1-204323886-204324145
CREB5	PLEKHA6	chr1-204334994-204337184
CREB5	PLEKHA6	chr1-204347634-204351951
CREB5	PLEKHA6	chr1-204357328-204359693
CREB5	PROX1-AS1	chr1-213851353-213852481
CREB5	PROX1-AS1	chr1-213969902-213970863
CREB5	PROX1-AS1	chr1-214013233-214014231
CREB5	PROX1-AS1	chr1-214018805-214020677
CREB5	PROX1	chr1-213969902-213970863
CREB5	PROX1	chr1-214013233-214014231
CREB5	PROX1	chr1-214018805-214020677
CREB5	CENPF	chr1-214648828-214649491
CREB5	CENPF	chr1-214659029-214659502
CREB5	CENPF	chr1-214660627-214661596
CREB5	ESRRG	chr1-216576142-216576921
CREB5	ESRRG	chr1-216672679-216673760
CREB5	ESRRG	chr1-216719469-216720365
CREB5	ESRRG	chr1-216944628-216945555
CREB5	ESRRG	chr1-217134030-217137666
CREB5	TGFB2	chr1-218273847-218274810
CREB5	TGFB2	chr1-218351348-218352437
CREB5	TGFB2	chr1-218366430-218367296
CREB5	TGFB2	chr1-218384373-218385425
CREB5	TGFB2	chr1-218420088-218420987
CREB5	TGFB2	chr1-218421207-218422197
CREB5	DUSP10	chr1-221708814-221709980
CREB5	DUSP10	chr1-221717927-221718894
CREB5	DUSP10	chr1-221742177-221744165
CREB5	DUSP10	chr1-221793909-221794888
CREB5	DUSP10	chr1-221831914-221832823
CREB5	DNAH14	chr1-224852673-224853624
CREB5	DNAH14	chr1-224929836-224930620
CREB5	RGS7	chr1-240706365-240707282
CREB5	RGS7	chr1-240987618-240988533
CREB5	RGS7	chr1-241076825-241078075
CREB5	RGS7	chr1-241078800-241080133
CREB5	RGS7	chr1-241207666-241208337
CREB5	RGS7	chr1-241331727-241332732
CREB5	RGS7	chr1-241376414-241377338
CREB5	RGS7	chr1-241420655-241421551
CREB5	RGS7	chr1-241424550-241424625
CREB5	KIF26B	chr1-245209666-245210686
CREB5	KIF26B	chr1-245214954-245215929
CREB5	KIF26B	chr1-245306725-245307653
CREB5	KIF26B	chr1-245310330-245311548
CREB5	KIF26B	chr1-245332023-245332974
CREB5	KIF26B	chr1-245371718-245371893
CREB5	KIF26B	chr1-245419746-245420206
CREB5	KIF26B	chr1-245474845-245475851
CREB5	KIF26B	chr1-245476315-245477116
CREB5	KIF26B	chr1-245512171-245512838
CREB5	SLC22A23	chr6-3176380-3177245
CREB5	SLC22A23	chr6-3195757-3196534
CREB5	SLC22A23	chr6-3227736-3231402
CREB5	SLC22A23	chr6-3246419-3253127
CREB5	SLC22A23	chr6-3317382-3318446
CREB5	SLC22A23	chr6-3338676-3339722
CREB5	SLC22A23	chr6-3354752-3359748
CREB5	SLC22A23	chr6-3380659-3382443
CREB5	SLC22A23	chr6-3408361-3409246
CREB5	SLC22A23	chr6-3422041-3423093
CREB5	SLC22A23	chr6-3454535-3455905
CREB5	SLC22A23	chr6-3489068-3490933
CREB5	SLC22A23	chr6-3549191-3550137
CREB5	DST	chr6-56363691-56364847
CREB5	DST	chr6-56369867-56371232
CREB5	DST	chr6-56542809-56543600
CREB5	DST	chr6-56551223-56552148
CREB5	DST	chr6-56575566-56576474
CREB5	DST	chr6-56581936-56582846
CREB5	DST	chr6-56708552-56709633
CREB5	DST	chr6-56954629-56955125
CREB5	DST	chr6-57020855-57021801
CREB5	DST	chr6-57051634-57052071
CREB5	ADGRB3	chr6-68734298-68735124
CREB5	ADGRB3	chr6-68936990-68937909
CREB5	ADGRB3	chr6-69116281-69117273
CREB5	ADGRB3	chr6-69281669-69282507
CREB5	COL9A1	chr6-70124999-70126180
CREB5	COL9A1	chr6-70151571-70152330
CREB5	COL9A1	chr6-70220722-70221705
CREB5	COL9A1	chr6-70365213-70366039
CREB5	LINC00472	chr6-71338528-71339453
CREB5	LINC00472	chr6-71345246-71346357
CREB5	LCA5	chr6-79430778-79431803
CREB5	LCA5	chr6-79544216-79545826
CREB5	LCA5	chr6-79570287-79571396
CREB5	LCA5	chr6-79574477-79575451
CREB5	LCA5	chr6-79599454-79601394
CREB5	LCA5	chr6-79604595-79605526
CREB5	LINC01621	chr6-79780575-79781519
CREB5	LINC01621	chr6-79791592-79792467
CREB5	LINC01621	chr6-79801276-79803582
CREB5	LINC01621	chr6-79808092-79812587
CREB5	LINC01621	chr6-79832490-79834889
CREB5	LINC01621	chr6-79860797-79861749
CREB5	LINC01621	chr6-79863502-79864705
CREB5	BACH2	chr6-89951863-89953424
CREB5	BACH2	chr6-89984881-89987692
CREB5	BACH2	chr6-89997795-89998544
CREB5	BACH2	chr6-90068148-90069835
CREB5	BACH2	chr6-90072743-90075156
CREB5	BACH2	chr6-90082610-90083470
CREB5	BACH2	chr6-90131371-90132337
CREB5	BACH2	chr6-90192769-90193697
CREB5	BACH2	chr6-90215594-90216713
CREB5	BACH2	chr6-90218246-90220295
CREB5	BACH2	chr6-90296909-90298472
CREB5	BACH2	chr6-90396017-90396997
CREB5	MMS22L	chr6-97048084-97049119
CREB5	MMS22L	chr6-97279564-97280519
CREB5	MMS22L	chr6-97306097-97307518
CREB5	GRIK2	chr6-101379618-101381728
CREB5	GRIK2	chr6-101985160-101985996
CREB5	METTL24	chr6-110360395-110361337
CREB5	METTL24	chr6-110448931-110449850
CREB5	SLC35F1	chr6-117981393-117982213
CREB5	SLC35F1	chr6-118171610-118172565
CREB5	SLC35F1	chr6-118197526-118198314
CREB5	SLC35F1	chr6-118242518-118243516
CREB5	SLC35F1	chr6-118256054-118256861
CREB5	SLC35F1	chr6-118263721-118264675
CREB5	SLC35F1	chr6-118276736-118277493
CREB5	SLC35F1	chr6-118283546-118284438
CREB5	MAN1A1	chr6-119195130-119197764
CREB5	MAN1A1	chr6-119311149-119312141
CREB5	MAN1A1	chr6-119445694-119446756
CREB5	HEY2	chr6-125699291-125700143
CREB5	NCOA7	chr6-125699291-125700143
CREB5	NCOA7	chr6-125812206-125813740
CREB5	EPB41L2	chr6-130873279-130874287
CREB5	EPB41L2	chr6-130899579-130900003
CREB5	EPB41L2	chr6-130966666-130969469
CREB5	EPB41L2	chr6-131003474-131004269
CREB5	EPB41L2	chr6-131111539-131112626
CREB5	EPB41L2	chr6-131122312-131123196
CREB5	AHI1	chr6-135224898-135225861
CREB5	AHI1	chr6-135233666-135234618
CREB5	AHI1	chr6-135495899-135497187
CREB5	AHI1	chr6-135505968-135507095
CREB5	PDE7B	chr6-135851196-135851695
CREB5	PDE7B	chr6-136113372-136114526
CREB5	PDE7B	chr6-136168990-136170360
CREB5	PDE7B	chr6-136180612-136181226
CREB5	NHSL1	chr6-138473510-138474445
CREB5	NHSL1	chr6-138526712-138528591
CREB5	NHSL1	chr6-138679972-138680891
CREB5	UTRN	chr6-144310297-144312175
CREB5	UTRN	chr6-144366249-144367122
CREB5	UTRN	chr6-144660276-144662279
CREB5	UTRN	chr6-144719764-144720670
CREB5	UTRN	chr6-144735034-144736013
CREB5	UTRN	chr6-144745548-144746413
CREB5	ADGB	chr6-146546358-146547181
CREB5	ADGB	chr6-146631954-146632963
CREB5	SAMD5	chr6-147433850-147434702
CREB5	SAMD5	chr6-147441559-147442417
CREB5	SAMD5	chr6-147503322-147504265
CREB5	SAMD5	chr6-147561371-147562269
CREB5	SASH1	chr6-148203485-148204653
CREB5	SASH1	chr6-148226119-148227114
CREB5	SASH1	chr6-148239887-148240856
CREB5	SASH1	chr6-148283122-148283759
CREB5	SASH1	chr6-148328776-148329895
CREB5	SASH1	chr6-148460711-148461622
CREB5	SASH1	chr6-148464416-148465413
CREB5	SASH1	chr6-148471675-148472613
CREB5	SASH1	chr6-148491248-148492140
CREB5	SASH1	chr6-148509338-148510403
CREB5	SASH1	chr6-148520383-148520875
CREB5	UST	chr6-148738898-148739795
CREB5	UST	chr6-148789961-148790868
CREB5	UST	chr6-148967023-148968150
CREB5	PLEKHG1	chr6-150548857-150550944
CREB5	PLEKHG1	chr6-150579698-150580738
CREB5	PLEKHG1	chr6-150581891-150583024
CREB5	PLEKHG1	chr6-150616516-150618202
CREB5	PLEKHG1	chr6-150645920-150646860
CREB5	PLEKHG1	chr6-150720405-150721087
CREB5	PLEKHG1	chr6-150813049-150814102
CREB5	PDE10A	chr6-165309608-165310203
CREB5	PDE10A	chr6-165648462-165650182
CREB5	PDE10A	chr6-165847310-165849007
CREB5	PDE10A	chr6-165895098-165895502
CREB5	PDE10A	chr6-165960734-165961778
CREB5	PDE10A	chr6-165986604-165987528
CREB5	PDE10A	chr6-166004372-166011247
CREB5	CHL1	chr3-212154-213102
CREB5	CHL1	chr3-228425-230319
CREB5	ATP2B2	chr3-10517000-10519160
CREB5	ATP2B2	chr3-10550439-10551332
CREB5	ATP2B2	chr3-10553208-10554736
CREB5	ATP2B2	chr3-10646217-10647198
CREB5	ATP2B2	chr3-10694219-10695148
CREB5	SLC6A11	chr3-10929340-10932412
CREB5	SLC6A1	chr3-10929340-10932412
CREB5	SLC6A1	chr3-10948843-10951777
CREB5	SLC6A1	chr3-10961291-10963039
CREB5	SLC6A1	chr3-10964390-10965484
CREB5	SLC6A1	chr3-10996593-10997632
CREB5	SLC6A1	chr3-11005790-11006673
CREB5	SLC6A1	chr3-11017975-11018597
CREB5	KCNH8	chr3-19432432-19433368
CREB5	KCNH8	chr3-19473844-19474904
CREB5	KCNH8	chr3-19475950-19476909
CREB5	ZNF385D	chr3-21360158-21361095
CREB5	ZNF385D	chr3-21475860-21476821
CREB5	ZNF385D	chr3-21738810-21739818
CREB5	ZNF385D	chr3-21750053-21750894
CREB5	ZNF385D	chr3-21878959-21879875
CREB5	ZNF385D	chr3-21913502-21914665
CREB5	ZNF385D	chr3-21943739-21945293
CREB5	ZNF385D	chr3-21989411-21990301
CREB5	THRB	chr3-24162719-24163703
CREB5	THRB	chr3-24165596-24166182
CREB5	THRB	chr3-24166325-24167315
CREB5	THRB	chr3-24303023-24303956
CREB5	THRB	chr3-24354926-24355875
CREB5	THRB	chr3-24505423-24506286
CREB5	RARB	chr3-25426119-25428262
CREB5	RARB	chr3-25433168-25434782
CREB5	RARB	chr3-25503817-25504733
CREB5	RARB	chr3-25547701-25548766
CREB5	OSBPL10	chr3-31610544-31611390
CREB5	OSBPL10	chr3-31745464-31746409
CREB5	OSBPL10	chr3-31858024-31858918
CREB5	OSBPL10	chr3-31879135-31879405
CREB5	OSBPL10	chr3-32018808-32019713
CREB5	OSBPL10	chr3-32116399-32117298
CREB5	GPD1L	chr3-32018808-32019713
CREB5	GPD1L	chr3-32116399-32117298
CREB5	LIMD1	chr3-45551182-45552158
CREB5	LIMD1	chr3-45575226-45576149
CREB5	LIMD1	chr3-45611204-45612260
CREB5	ERC2	chr3-55416135-55417092
CREB5	ERC2	chr3-55545602-55546497
CREB5	ERC2	chr3-55607911-55609181
CREB5	ERC2	chr3-55765161-55765982
CREB5	ERC2	chr3-55802592-55803510
CREB5	ERC2	chr3-56007322-56007870
CREB5	ERC2	chr3-56219849-56221088
CREB5	ERC2	chr3-56243908-56244865
CREB5	ERC2	chr3-56355294-56356355
CREB5	ERC2	chr3-56357045-56358084
CREB5	ERC2	chr3-56451357-56452665
CREB5	ARHGEF3	chr3-56633973-56634472
CREB5	ARHGEF3	chr3-56836751-56838033
CREB5	ARHGEF3	chr3-56855610-56856642
CREB5	ARHGEF3	chr3-56904352-56905396
CREB5	ARHGEF3	chr3-56928169-56929044
CREB5	ARHGEF3	chr3-57014304-57015223
CREB5	ARHGEF3	chr3-57068182-57069185
CREB5	ARHGEF3	chr3-57160343-57161203
CREB5	PTPRG	chr3-61596860-61598376
CREB5	PTPRG	chr3-61598459-61599358
CREB5	PTPRG	chr3-61682429-61683572
CREB5	PTPRG	chr3-61688041-61689173
CREB5	PTPRG	chr3-61857650-61858493
CREB5	PTPRG	chr3-61961604-61962573
CREB5	PTPRG	chr3-62132276-62132601
CREB5	PTPRG	chr3-62188608-62189643
CREB5	PTPRG	chr3-62239991-62243575
CREB5	FRMD4B	chr3-69433623-69434527
CREB5	FRMD4B	chr3-69496137-69497061
CREB5	FRMD4B	chr3-69522836-69523765
CREB5	CNTN3	chr3-74210465-74212201
CREB5	CNTN3	chr3-74377679-74378562
CREB5	CNTN3	chr3-74380483-74381392
CREB5	CNTN3	chr3-74387394-74388342
CREB5	CNTN3	chr3-74431651-74432648
CREB5	CNTN3	chr3-74447006-74447875
CREB5	ROBO2	chr3-76039335-76040243
CREB5	ROBO2	chr3-76070727-76071709
CREB5	ROBO2	chr3-76313488-76314424
CREB5	ROBO2	chr3-76501789-76502800
CREB5	ROBO2	chr3-76552603-76553091
CREB5	ROBO2	chr3-76958826-76959846
CREB5	ROBO2	chr3-77079813-77082043
CREB5	ROBO2	chr3-77106791-77107660
CREB5	ROBO2	chr3-77121843-77123016
CREB5	ROBO2	chr3-77125888-77126864
CREB5	ROBO2	chr3-77145690-77146649
CREB5	ROBO2	chr3-77147251-77150697
CREB5	ROBO2	chr3-77182305-77184115
CREB5	ROBO2	chr3-77233875-77234703
CREB5	ROBO2	chr3-77254998-77256030
CREB5	ROBO2	chr3-77526505-77527402
CREB5	VGLL3	chr3-86991120-86991985
CREB5	EPHA3	chr3-89098663-89099589
CREB5	EPHA3	chr3-89113896-89115209
CREB5	EPHA3	chr3-89137678-89138537
CREB5	EPHA3	chr3-89314166-89315092
CREB5	EPHA6	chr3-96862817-96863833
CREB5	EPHA6	chr3-97244864-97245851
CREB5	EPHA6	chr3-97579047-97580050
CREB5	EPHA6	chr3-97601029-97602003
CREB5	ADGRG7	chr3-100534382-100535163
CREB5	ADGRG7	chr3-100682034-100683197
CREB5	ABI3BP	chr3-100682034-100683197
CREB5	ABI3BP	chr3-100696772-100697703
CREB5	ABI3BP	chr3-100761080-100761957
CREB5	ABI3BP	chr3-100952836-100953800
CREB5	ABI3BP	chr3-100993516-100993943
CREB5	ZPLD1	chr3-102098272-102099227
CREB5	ZPLD1	chr3-102223911-102224727
CREB5	ZPLD1	chr3-102225055-102226063
CREB5	ALCAM	chr3-105355314-105357123
CREB5	ALCAM	chr3-105422345-105423250
CREB5	ALCAM	chr3-105431247-105431615
CREB5	BOC	chr3-113240837-113244490
CREB5	BOC	chr3-113255990-113256896
CREB5	LSAMP	chr3-115766787-115767718
CREB5	LSAMP	chr3-115783255-115785929
CREB5	LSAMP	chr3-116003161-116004131
CREB5	LSAMP	chr3-116319315-116320199
CREB5	LSAMP	chr3-116600533-116601404
CREB5	LSAMP	chr3-116651031-116651966
CREB5	LSAMP	chr3-116814363-116815486
CREB5	LSAMP	chr3-116826668-116827718
CREB5	LSAMP	chr3-117194018-117194902
CREB5	LSAMP	chr3-117217595-117218446
CREB5	MAATS1	chr3-119731608-119732293
CREB5	SEMA5B	chr3-122977073-122979234
CREB5	SEMA5B	chr3-123045119-123045976
CREB5	SEMA5B	chr3-123046426-123047466
CREB5	SEMA5B	chr3-123052717-123053720
CREB5	SEMA5B	chr3-123054640-123055766
CREB5	SEMA5B	chr3-123099499-123101241
CREB5	SEMA5B	chr3-123125259-123126834
CREB5	ITGB5	chr3-124780705-124781618
CREB5	ITGB5	chr3-124923931-124924786
CREB5	ITGB5	chr3-124993348-124994293
CREB5	TF	chr3-133691591-133692388
CREB5	TF	chr3-133717231-133718129
CREB5	SPSB4	chr3-140974839-140975765
CREB5	SPSB4	chr3-141055543-141059005
CREB5	SPSB4	chr3-141087067-141088828
CREB5	ZIC1	chr3-147354428-147355519
CREB5	ZIC1	chr3-147389768-147390102
CREB5	ZIC1	chr3-147421560-147424963
CREB5	CP	chr3-149080085-149080988
CREB5	TNIK	chr3-171225712-171226294
CREB5	TNIK	chr3-171266109-171267052
CREB5	TNIK	chr3-171373638-171374643
CREB5	TNIK	chr3-171381875-171385385
CREB5	TNIK	chr3-171415499-171416185
CREB5	TNIK	chr3-171416239-171417102
CREB5	NLGN1	chr3-173360562-173361471
CREB5	NLGN1	chr3-173693896-173694832
CREB5	NLGN1	chr3-173745884-173746665
CREB5	NLGN1	chr3-173913836-173914828
CREB5	NLGN1	chr3-174169961-174170839
CREB5	NLGN1	chr3-174204261-174205173
CREB5	NLGN1	chr3-174219149-174220107
CREB5	NLGN1	chr3-174248912-174249897
CREB5	P3H2	chr3-189955845-189956711
CREB5	P3H2	chr3-190101483-190102438
CREB5	P3H2	chr3-190108819-190110847
CREB5	P3H2	chr3-190182726-190183902
CREB5	SDK1	chr7-3299962-3301447
CREB5	SDK1	chr7-3369995-3371277
CREB5	SDK1	chr7-3399520-3400458
CREB5	SDK1	chr7-3400700-3401643
CREB5	SDK1	chr7-3415622-3417227
CREB5	SDK1	chr7-3470817-3471761
CREB5	SDK1	chr7-3494918-3495979
CREB5	SDK1	chr7-3523011-3523962
CREB5	SDK1	chr7-3844362-3845256
CREB5	SDK1	chr7-3847003-3847950
CREB5	SDK1	chr7-3861596-3862432
CREB5	SDK1	chr7-3921897-3922839
CREB5	SDK1	chr7-3954852-3956849
CREB5	SDK1	chr7-3971003-3971465
CREB5	SDK1	chr7-3978811-3980357
CREB5	SDK1	chr7-4027664-4028663
CREB5	SDK1	chr7-4042124-4043184
CREB5	SDK1	chr7-4126477-4127181
CREB5	SDK1	chr7-4167565-4167966
CREB5	THSD7A	chr7-11340982-11341973
CREB5	THSD7A	chr7-11614917-11615809
CREB5	THSD7A	chr7-11701691-11704383
CREB5	THSD7A	chr7-11781823-11782757
CREB5	THSD7A	chr7-11809828-11810771
CREB5	THSD7A	chr7-11875447-11876484
CREB5	DGKB	chr7-14182393-14183463
CREB5	DGKB	chr7-14467472-14468501
CREB5	DGKB	chr7-14746887-14748774
CREB5	DGKB	chr7-14766920-14767853
CREB5	HDAC9	chr7-18238132-18239189
CREB5	HDAC9	chr7-18489549-18490183
CREB5	HDAC9	chr7-18715709-18716638
CREB5	DNAH11	chr7-21677108-21677770
CREB5	DNAH11	chr7-21767056-21767958
CREB5	DNAH11	chr7-21886141-21887049
CREB5	NPVF	chr7-25125362-25126337
CREB5	NPVF	chr7-25228194-25228301
CREB5	NPVF	chr7-25258564-25260310
CREB5	NPVF	chr7-25294755-25295649
CREB5	NPVF	chr7-25314262-25315216
CREB5	EEPD1	chr7-36070064-36071037
CREB5	EEPD1	chr7-36155203-36156909
CREB5	AMPH	chr7-38318356-38319508
CREB5	AMPH	chr7-38331473-38332395
CREB5	AMPH	chr7-38337854-38338608
CREB5	AMPH	chr7-38452652-38453466
CREB5	GRB10	chr7-50501999-50503030
CREB5	GRB10	chr7-50531306-50532653
CREB5	GRB10	chr7-50584792-50585523
CREB5	GRB10	chr7-50609881-50610879
CREB5	GRB10	chr7-50676475-50678336
CREB5	GRB10	chr7-50712652-50713470
CREB5	GRB10	chr7-50728005-50728923
CREB5	GRB10	chr7-50742046-50742923
CREB5	GRB10	chr7-50781501-50782423
CREB5	GRB10	chr7-50793463-50794368
CREB5	GRB10	chr7-50812564-50813512
CREB5	GRB10	chr7-50864393-50865385
CREB5	GRB10	chr7-50866712-50867666
CREB5	COBL	chr7-50957017-50958115
CREB5	COBL	chr7-51153933-51154871
CREB5	COBL	chr7-51162397-51163397
CREB5	COBL	chr7-51255714-51256712
CREB5	COBL	chr7-51356690-51357518
CREB5	EGFR	chr7-54932758-54934063
CREB5	EGFR	chr7-54949610-54950320
CREB5	EGFR	chr7-55019366-55021156
CREB5	EGFR	chr7-55073686-55074571
CREB5	EGFR	chr7-55098107-55101260
CREB5	EGFR	chr7-55128743-55132325
CREB5	EGFR	chr7-55195512-55196398
CREB5	GNAI1	chr7-80039190-80040141
CREB5	CDK6	chr7-92691209-92692257
CREB5	CDK6	chr7-92753561-92756027
CREB5	CDK6	chr7-92780845-92781777
CREB5	RELN	chr7-103406519-103407639
CREB5	RELN	chr7-103541849-103542604
CREB5	RELN	chr7-103752563-103753181
CREB5	RELN	chr7-103907095-103907919
CREB5	RELN	chr7-103929898-103930800
CREB5	FOXP2	chr7-114081531-114086326
CREB5	FOXP2	chr7-114426680-114427265
CREB5	FOXP2	chr7-114432431-114433402
CREB5	FOXP2	chr7-114659674-114660607
CREB5	CADPS2	chr7-122304512-122307673
CREB5	CADPS2	chr7-122310692-122312432
CREB5	CADPS2	chr7-122369446-122370475
CREB5	CADPS2	chr7-122437913-122438340
CREB5	CADPS2	chr7-122520794-122521804
CREB5	CADPS2	chr7-122617075-122618081
CREB5	CADPS2	chr7-122618382-122619128
CREB5	CADPS2	chr7-122766343-122767840
CREB5	CADPS2	chr7-122965117-122966026
CREB5	AHCYL2	chr7-129143699-129144891
CREB5	AHCYL2	chr7-129342782-129343768
CREB5	PTN	chr7-137150420-137151657
CREB5	PTN	chr7-137305864-137306735
CREB5	PTN	chr7-137316454-137317453
CREB5	PTN	chr7-137328071-137329044
CREB5	PTN	chr7-137341890-137342688
CREB5	ZC3HAV1	chr7-138978824-138981082
CREB5	LINC00689	chr7-158973214-158974559
CREB5	LINC00689	chr7-158975821-158979367
CREB5	LINC00689	chr7-158991433-158993520
CREB5	LINC00689	chr7-159004845-159005843
CREB5	VIPR2	chr7-158973214-158974559
CREB5	VIPR2	chr7-158975821-158979367
CREB5	VIPR2	chr7-158991433-158993520
CREB5	VIPR2	chr7-159004845-159005843
CREB5	VIPR2	chr7-159036903-159037513
CREB5	VIPR2	chr7-159040732-159041742
CREB5	VIPR2	chr7-159073397-159074314
CREB5	VIPR2	chr7-159130048-159131033
CREB5	VIPR2	chr7-159160263-159161120
CREB5	WNT5B	chr12-1453711-1454813
CREB5	WNT5B	chr12-1579593-1582076
CREB5	WNT5B	chr12-1604670-1606654
CREB5	DUSP16	chr12-12397921-12398869
CREB5	DUSP16	chr12-12497042-12497994
CREB5	DUSP16	chr12-12562384-12564660
CREB5	PTPRO	chr12-15226859-15227521
CREB5	PTPRO	chr12-15372570-15373400
CREB5	PTPRO	chr12-15417328-15418423
CREB5	ST8SIA1	chr12-22192421-22193390
CREB5	ST8SIA1	chr12-22262044-22264780
CREB5	ST8SIA1	chr12-22287973-22288895
CREB5	ST8SIA1	chr12-22306896-22307823
CREB5	SOX5	chr12-23687501-23688473
CREB5	SOX5	chr12-23763579-23764015
CREB5	SOX5	chr12-23810033-23810934
CREB5	SOX5	chr12-24020130-24021132
CREB5	TMTC1	chr12-29694762-29695747
CREB5	TMTC1	chr12-29727808-29728701
CREB5	TMTC1	chr12-29732091-29733068
CREB5	TMTC1	chr12-29769118-29770104
CREB5	TMTC1	chr12-29882555-29883453
CREB5	KIF21A	chr12-39199080-39200003
CREB5	CNTN1	chr12-40621891-40622949
CREB5	CNTN1	chr12-40751489-40752720
CREB5	CNTN1	chr12-40898417-40899206
CREB5	CNTN1	chr12-40899654-40900578
CREB5	CNTN1	chr12-40901432-40902111
CREB5	CNTN1	chr12-40917365-40918265
CREB5	SLC38A1	chr12-46160058-46161214
CREB5	SLC38A1	chr12-46302779-46303791
CREB5	SLC38A1	chr12-46342309-46343312
CREB5	SRGAP1	chr12-63866699-63867687
CREB5	SRGAP1	chr12-63996181-63997240
CREB5	SRGAP1	chr12-64082677-64083803
CREB5	WIF1	chr12-64990834-64992950
CREB5	WIF1	chr12-65011781-65013098
CREB5	WIF1	chr12-65093392-65094255
CREB5	LGR5	chr12-71414296-71415234
CREB5	LGR5	chr12-71438460-71439769
CREB5	LGR5	chr12-71474754-71475819
CREB5	LGR5	chr12-71548624-71549647
CREB5	PHLDA1	chr12-75952943-75954575
CREB5	PHLDA1	chr12-75990944-75991820
CREB5	PHLDA1	chr12-76085034-76086307
CREB5	NAV3	chr12-77349488-77350396
CREB5	NAV3	chr12-77492217-77494084
CREB5	NAV3	chr12-77546678-77547480
CREB5	NAV3	chr12-77942028-77942785
CREB5	NAV3	chr12-77999729-78000694
CREB5	NAV3	chr12-78082602-78083584
CREB5	NAV3	chr12-78181247-78182211
CREB5	LIN7A	chr12-80837093-80839295
CREB5	LIN7A	chr12-80863113-80863728
CREB5	PPFIA2	chr12-81295036-81295685
CREB5	PPFIA2	chr12-81296894-81298062
CREB5	PPFIA2	chr12-81316859-81317807
CREB5	PPFIA2	chr12-81454603-81455446
CREB5	PPFIA2	chr12-81465607-81466581
CREB5	PPFIA2	chr12-81543968-81544839
CREB5	PPFIA2	chr12-81579025-81579983
CREB5	PPFIA2	chr12-81614908-81615752
CREB5	PPFIA2	chr12-81627202-81628170
CREB5	PPFIA2	chr12-81853018-81854003
CREB5	LUM	chr12-91043083-91044045
CREB5	LUM	chr12-91205491-91206695
CREB5	LINC01619	chr12-91965375-91966286
CREB5	LINC01619	chr12-92137022-92137730
CREB5	LINC01619	chr12-92145898-92147250
CREB5	LINC01619	chr12-92172408-92173308
CREB5	PLXNC1	chr12-94073120-94074876
CREB5	PLXNC1	chr12-94150868-94153058
CREB5	PLXNC1	chr12-94164463-94165641
CREB5	PLXNC1	chr12-94245785-94246538
CREB5	PLXNC1	chr12-94274914-94275738
CREB5	RMST	chr12-97563319-97564149
CREB5	TMPO	chr12-98474752-98475899
CREB5	CRY1	chr12-106919677-106920720
CREB5	CRY1	chr12-106968156-106969098
CREB5	CRY1	chr12-107038470-107039387
CREB5	CRY1	chr12-107126752-107128154
CREB5	TBX5	chr12-114263049-114264102
CREB5	TBX5	chr12-114443555-114444493
CREB5	TBX5	chr12-114499034-114499969
CREB5	TBX5	chr12-114508086-114509124
CREB5	KSR2	chr12-117377460-117378369
CREB5	KSR2	chr12-117388772-117389783
CREB5	KSR2	chr12-117449908-117450803
CREB5	KSR2	chr12-117467206-117467553
CREB5	KSR2	chr12-117487107-117488018
CREB5	KSR2	chr12-117696506-117697432
CREB5	KSR2	chr12-117794516-117795493
CREB5	KSR2	chr12-117857465-117858316
CREB5	KSR2	chr12-117872303-117873300
CREB5	KSR2	chr12-117874438-117876801
CREB5	KSR2	chr12-117878203-117879171
CREB5	KSR2	chr12-118014427-118016700
CREB5	KSR2	chr12-118036735-118037637
CREB5	SRRM4	chr12-119072071-119073039
CREB5	SRRM4	chr12-119139322-119140117
CREB5	SRRM4	chr12-119148996-119149919
CREB5	SCARB1	chr12-124680877-124682895
CREB5	SCARB1	chr12-124685237-124686735
CREB5	SCARB1	chr12-124687530-124688591
CREB5	SCARB1	chr12-124712854-124714849
CREB5	SCARB1	chr12-124761677-124762595
CREB5	SCARB1	chr12-124764428-124765315
CREB5	SCARB1	chr12-124796432-124798089
CREB5	SCARB1	chr12-124841120-124845553
CREB5	SCARB1	chr12-124904317-124905477
CREB5	GLT1D1	chr12-128763345-128764441
CREB5	GLT1D1	chr12-128817360-128818412
CREB5	GLT1D1	chr12-128864466-128865409
CREB5	GLT1D1	chr12-128971587-128972591
CREB5	GLT1D1	chr12-128975884-128976871
CREB5	TMEM132D	chr12-128975884-128976871
CREB5	TMEM132D	chr12-129145163-129146057
CREB5	TMEM132D	chr12-129230615-129231985
CREB5	TMEM132D	chr12-129261294-129262226
CREB5	TMEM132D	chr12-129467291-129468369
CREB5	TMEM132D	chr12-129559532-129560484
CREB5	TMEM132D	chr12-129877118-129878090
CREB5	ST5	chr11-8603639-8604724
CREB5	ST5	chr11-8658837-8659255
CREB5	ST5	chr11-8764924-8765657
CREB5	ST5	chr11-8766713-8767136
CREB5	ST5	chr11-8772846-8773653
CREB5	ST5	chr11-8783949-8784914
CREB5	ST5	chr11-8805459-8807825
CREB5	ST5	chr11-8832588-8833863
CREB5	ST5	chr11-8914097-8914825
CREB5	SPON1	chr11-14026720-14027661
CREB5	SPON1	chr11-14114242-14115197
CREB5	SPON1	chr11-14182965-14183867
CREB5	SOX6	chr11-15889673-15890923
CREB5	SOX6	chr11-16031332-16032148
CREB5	SOX6	chr11-16093756-16094631
CREB5	SOX6	chr11-16161004-16162068
CREB5	SOX6	chr11-16453503-16454416
CREB5	SOX6	chr11-16796122-16796931
CREB5	NAV2	chr11-19330052-19330957
CREB5	NAV2	chr11-19349121-19350184
CREB5	NAV2	chr11-19359107-19360647
CREB5	NAV2	chr11-19381722-19383850
CREB5	NAV2	chr11-19392340-19393229
CREB5	NAV2	chr11-19398132-19400110
CREB5	NAV2	chr11-19524062-19524992
CREB5	NAV2	chr11-19577566-19578886
CREB5	NAV2	chr11-19595983-19599282
CREB5	NAV2	chr11-19650094-19650989
CREB5	NAV2	chr11-19691459-19692454
CREB5	NAV2	chr11-19750788-19751682
CREB5	NAV2	chr11-19758068-19759260
CREB5	NAV2	chr11-19765890-19766886
CREB5	NAV2	chr11-19790952-19791778
CREB5	NAV2	chr11-19837311-19838223
CREB5	NAV2	chr11-19876773-19877677
CREB5	NAV2	chr11-19890042-19890986
CREB5	NAV2	chr11-19937895-19938854
CREB5	NAV2	chr11-19957045-19958217
CREB5	KIF18A	chr11-28120475-28121526
CREB5	MPPED2	chr11-30508098-30510131
CREB5	MPPED2	chr11-30594232-30595210
CREB5	MPPED2	chr11-30635018-30636380
CREB5	DCDC1	chr11-31091512-31092095
CREB5	DCDC1	chr11-31110638-31111557
CREB5	DCDC1	chr11-31129900-31130626
CREB5	DCDC1	chr11-31131333-31133848
CREB5	DCDC1	chr11-31398406-31399259
CREB5	DCDC1	chr11-31402255-31403083
CREB5	DCDC1	chr11-31449092-31449711
CREB5	CD44	chr11-35183170-35184646
CREB5	LRRC4C	chr11-40023000-40024056
CREB5	LRRC4C	chr11-40024876-40025627
CREB5	LRRC4C	chr11-40171250-40172352
CREB5	LRRC4C	chr11-40213270-40215311
CREB5	LRRC4C	chr11-40328863-40329747
CREB5	LRRC4C	chr11-40593780-40594658
CREB5	LRRC4C	chr11-41003289-41004855
CREB5	LRRC4C	chr11-41117868-41119027
CREB5	LRRC4C	chr11-41145986-41146946
CREB5	LRRC4C	chr11-41177672-41178508
CREB5	LRRC4C	chr11-41189371-41190256
CREB5	LRRC4C	chr11-41235413-41236301
CREB5	LRRC4C	chr11-41280812-41281845
CREB5	LRRC4C	chr11-41362484-41363404
CREB5	LRRC4C	chr11-41366267-41367194
CREB5	LRRC4C	chr11-41367565-41368756
CREB5	LRRC4C	chr11-41446619-41447572
CREB5	MDK	chr11-46290241-46291179
CREB5	MDK	chr11-46310508-46310913
CREB5	MDK	chr11-46318344-46319335
CREB5	SLC15A3	chr11-60841227-60842070
CREB5	SLC15A3	chr11-60891719-60892470
CREB5	SLC15A3	chr11-60905453-60906363
CREB5	SLC15A3	chr11-61011136-61013347
CREB5	MAML2	chr11-96045702-96046633
CREB5	MAML2	chr11-96193733-96197500
CREB5	MAML2	chr11-96265130-96265865
CREB5	CNTN5	chr11-99268585-99269520
CREB5	CNTN5	chr11-99443143-99444093
CREB5	CNTN5	chr11-99777845-99778856
CREB5	CNTN5	chr11-100009665-100010484
CREB5	ARHGAP42	chr11-100673412-100674191
CREB5	ARHGAP42	chr11-100703587-100705619
CREB5	ARHGAP42	chr11-100731223-100732186
CREB5	ARHGAP42	chr11-100830026-100830966
CREB5	ARHGAP42	chr11-100857231-100858161
CREB5	GRIA4	chr11-105535916-105536860
CREB5	GRIA4	chr11-105609183-105609993
CREB5	GRIA4	chr11-105698971-105699665
CREB5	GRIA4	chr11-105857274-105858391
CREB5	GUCY1A2	chr11-106765507-106766443
CREB5	GUCY1A2	chr11-106834294-106835192
CREB5	GUCY1A2	chr11-106860203-106861212
CREB5	CRYAB	chr11-111907524-111908544
CREB5	CRYAB	chr11-111918535-111918677
CREB5	CRYAB	chr11-111937560-111940609
CREB5	CRYAB	chr11-111991975-111992414
CREB5	ZBTB16	chr11-113974701-113974880
CREB5	ZBTB16	chr11-114147532-114148561
CREB5	ZBTB16	chr11-114163913-114164558
CREB5	ZBTB16	chr11-114182143-114183851
CREB5	CADM1	chr11-115194111-115195254
CREB5	CADM1	chr11-115207063-115207301
CREB5	CADM1	chr11-115244400-115245242
CREB5	CADM1	chr11-115276104-115277269
CREB5	CADM1	chr11-115279543-115281518
CREB5	CADM1	chr11-115281824-115282723
CREB5	CADM1	chr11-115321400-115322456
CREB5	CADM1	chr11-115396264-115396755
CREB5	CADM1	chr11-115576888-115578542
CREB5	AP000462.1	chr11-115321400-115322456
CREB5	AP000462.1	chr11-115396264-115396755
CREB5	MCAM	chr11-119315821-119315982
CREB5	MCAM	chr11-119373522-119376223
CREB5	CDON	chr11-125986766-125987633
CREB5	CDON	chr11-126072164-126073191
CREB5	CDON	chr11-126079261-126080774
CREB5	CDON	chr11-126102414-126107107
CREB5	CDON	chr11-126145787-126148209
CREB5	CDON	chr11-126153258-126156090
CREB5	KIRREL3	chr11-126496708-126499689
CREB5	KIRREL3	chr11-126537810-126539193
CREB5	KIRREL3	chr11-126546282-126549283
CREB5	KIRREL3	chr11-126601142-126603943
CREB5	KIRREL3	chr11-126624364-126625415
CREB5	KIRREL3	chr11-126638120-126640997
CREB5	KIRREL3	chr11-126700480-126704822
CREB5	KIRREL3	chr11-126790329-126791885
CREB5	KIRREL3	chr11-126878639-126879676
CREB5	KIRREL3	chr11-126929150-126931052
CREB5	KIRREL3	chr11-126942322-126943174
CREB5	KIRREL3	chr11-126949082-126950076
CREB5	KIRREL3	chr11-127054934-127056969
CREB5	KIRREL3	chr11-127101321-127102240
CREB5	ARHGAP32	chr11-128874116-128875124
CREB5	ARHGAP32	chr11-129312735-129314610
CREB5	ARHGAP32	chr11-129363860-129364805
CREB5	OPCML	chr11-132405422-132406345
CREB5	OPCML	chr11-132576459-132577338
CREB5	OPCML	chr11-132578589-132580378
CREB5	OPCML	chr11-132595382-132596369
CREB5	OPCML	chr11-132751444-132752474
CREB5	OPCML	chr11-132781895-132782738
CREB5	OPCML	chr11-132834196-132835182
CREB5	OPCML	chr11-132884764-132885657
CREB5	OPCML	chr11-132901352-132902281
CREB5	OPCML	chr11-132909117-132910773
CREB5	OPCML	chr11-133041355-133042647
CREB5	OPCML	chr11-133123144-133124102
CREB5	OPCML	chr11-133132736-133133711
CREB5	OPCML	chr11-133187659-133188461
CREB5	OPCML	chr11-133204662-133205677
CREB5	OPCML	chr11-133234609-133235574
CREB5	OPCML	chr11-133429340-133430193
CREB5	OPCML	chr11-133618248-133619277
CREB5	AFAP1	chr4-7670367-7671234
CREB5	AFAP1	chr4-7750332-7751240
CREB5	AFAP1	chr4-7801815-7802786
CREB5	AFAP1	chr4-7872314-7873242
CREB5	AFAP1	chr4-7969515-7974344
CREB5	CLNK	chr4-10456299-10457133
CREB5	CLNK	chr4-10599299-10600233
CREB5	CLNK	chr4-10667912-10668901
CREB5	CLNK	chr4-10677486-10678479
CREB5	LDB2	chr4-16615424-16616223
CREB5	LDB2	chr4-16668546-16669521
CREB5	LDB2	chr4-16674320-16674697
CREB5	LDB2	chr4-16782943-16783838
CREB5	LDB2	chr4-16887636-16888526
CREB5	QDPR	chr4-17467198-17468034
CREB5	QDPR	chr4-17543821-17545546
CREB5	QDPR	chr4-17576161-17577191
CREB5	SEL1L3	chr4-25859310-25860406
CREB5	SEL1L3	chr4-25876196-25877149
CREB5	SEL1L3	chr4-25886061-25887300
CREB5	SEL1L3	chr4-25889873-25891521
CREB5	SEL1L3	chr4-25925524-25928214
CREB5	PCDH7	chr4-30821637-30823954
CREB5	PCDH7	chr4-30834903-30835801
CREB5	NWD2	chr4-37157025-37158142
CREB5	NWD2	chr4-37252935-37253769
CREB5	NWD2	chr4-37321659-37322655
CREB5	NWD2	chr4-37339113-37339213
CREB5	NWD2	chr4-37392322-37393310
CREB5	APBB2	chr4-41256090-41256412
CREB5	APBB2	chr4-41264466-41264885
CREB5	APBB2	chr4-41267721-41267986
CREB5	APBB2	chr4-41269729-41270531
CREB5	APBB2	chr4-41284853-41285953
CREB5	KIT	chr4-54658082-54660482
CREB5	CEP135	chr4-55903216-55904172
CREB5	ADAMTS3	chr4-72207405-72208306
CREB5	ART3	chr4-76024558-76025382
CREB5	SHROOM3	chr4-76430352-76431337
CREB5	SHROOM3	chr4-76568298-76568387
CREB5	SHROOM3	chr4-76588043-76588995
CREB5	SHROOM3	chr4-76597316-76598261
CREB5	SHROOM3	chr4-76680972-76682459
CREB5	SHROOM3	chr4-76749091-76749353
CREB5	RASGEF1B	chr4-81353384-81354522
CREB5	RASGEF1B	chr4-81400171-81401061
CREB5	RASGEF1B	chr4-81503294-81505323
CREB5	RASGEF1B	chr4-81611372-81612364
CREB5	RASGEF1B	chr4-81631613-81632567
CREB5	RASGEF1B	chr4-81632652-81633575
CREB5	RASGEF1B	chr4-81684078-81685037
CREB5	RASGEF1B	chr4-81807209-81808054
CREB5	RASGEF1B	chr4-81844412-81845364
CREB5	RASGEF1B	chr4-82027977-82028784
CREB5	CDS1	chr4-84520363-84521257
CREB5	CDS1	chr4-84581594-84582978
CREB5	MAPK10	chr4-86014310-86015122
CREB5	MAPK10	chr4-86272428-86273319
CREB5	MAPK10	chr4-86282696-86283678
CREB5	MAPK10	chr4-86488847-86489700
CREB5	KLHL8	chr4-87117000-87119282
CREB5	GRID2	chr4-92863605-92864854
CREB5	GRID2	chr4-93413879-93414801
CREB5	GRID2	chr4-93646421-93647279
CREB5	GRID2	chr4-93754713-93755734
CREB5	GRID2	chr4-93762405-93763296
CREB5	PDLIM5	chr4-94621222-94622142
CREB5	MTTP	chr4-99564033-99564080
CREB5	PPP3CA	chr4-101027057-101028058
CREB5	LEF1	chr4-107988732-107989713
CREB5	LEF1	chr4-108114372-108115296
CREB5	LEF1	chr4-108141064-108142066
CREB5	LEF1	chr4-108144276-108145185
CREB5	COL25A1	chr4-108730383-108731402
CREB5	COL25A1	chr4-108877902-108878865
CREB5	COL25A1	chr4-109160254-109161137
CREB5	COL25A1	chr4-109265460-109265897
CREB5	COL25A1	chr4-109298219-109299270
CREB5	EGF	chr4-109860457-109861394
CREB5	EGF	chr4-109878798-109879644
CREB5	EGF	chr4-109954838-109955807
CREB5	EGF	chr4-109977537-109979577
CREB5	SYNPO2	chr4-118834730-118835940
CREB5	SYNPO2	chr4-118980618-118982585
CREB5	SCLT1	chr4-128869095-128870000
CREB5	HHIP	chr4-144649458-144650614
CREB5	HHIP	chr4-144709877-144710872
CREB5	TTC29	chr4-146793396-146794323
CREB5	TTC29	chr4-146833898-146834705
CREB5	TTC29	chr4-146916210-146917219
CREB5	NR3C2	chr4-148054083-148054848
CREB5	NR3C2	chr4-148064127-148064415
CREB5	FAM160A1	chr4-151522387-151523580
CREB5	FAM160A1	chr4-151599391-151600513
CREB5	TRIM2	chr4-153059717-153060845
CREB5	TRIM2	chr4-153061719-153062754
CREB5	TRIM2	chr4-153079642-153080592
CREB5	TRIM2	chr4-153142685-153144625
CREB5	TRIM2	chr4-153241893-153242979
CREB5	TRIM2	chr4-153265621-153266520
CREB5	PDGFC	chr4-156663401-156664406
CREB5	PDGFC	chr4-156773718-156774371
CREB5	PDGFC	chr4-156961386-156962253
CREB5	FSTL5	chr4-161510907-161511734
CREB5	FSTL5	chr4-162151155-162153066
CREB5	FSTL5	chr4-162157327-162158348
CREB5	FSTL5	chr4-162164036-162165142
CREB5	2023-03-01	chr4-163564682-163565136
CREB5	2023-03-01	chr4-163592054-163592988
CREB5	2023-03-01	chr4-163701602-163703946
CREB5	2023-03-01	chr4-163991208-163992137
CREB5	2023-03-01	chr4-164012325-164013254
CREB5	2023-03-01	chr4-164165716-164166766
CREB5	2023-03-01	chr4-164375509-164376473
CREB5	2023-03-01	chr4-164384051-164385610
CREB5	2023-03-01	chr4-164439740-164440708
CREB5	CPE	chr4-165457566-165458578
CREB5	PALLD	chr4-168557349-168558293
CREB5	PALLD	chr4-168618505-168619369
CREB5	PALLD	chr4-168633830-168635032
CREB5	PALLD	chr4-168647542-168648457
CREB5	PALLD	chr4-168651112-168653418
CREB5	PALLD	chr4-168784519-168785852
CREB5	PALLD	chr4-168803461-168804451
CREB5	PALLD	chr4-168832172-168833845
CREB5	TENM3	chr4-182136893-182137990
CREB5	TENM3	chr4-182180915-182181853
CREB5	TENM3	chr4-182189251-182191993
CREB5	TENM3	chr4-182292475-182293312
CREB5	TENM3	chr4-182302583-182303483
CREB5	TENM3	chr4-182455069-182455618
CREB5	TENM3	chr4-182478076-182479023
CREB5	TENM3	chr4-182533715-182534657
CREB5	TENM3	chr4-182695416-182696255
CREB5	TENM3	chr4-182700639-182701445
CREB5	TENM3	chr4-182778102-182779070
CREB5	TEKT1	chr17-6752821-6754140
CREB5	TEKT1	chr17-6853408-6854373
CREB5	RCVRN	chr17-9808178-9808829
CREB5	RCVRN	chr17-9812909-9813801
CREB5	RCVRN	chr17-9816790-9817795
CREB5	RCVRN	chr17-9898205-9900988
CREB5	RCVRN	chr17-9903262-9904799
CREB5	RASD1	chr17-17405652-17406704
CREB5	RASD1	chr17-17478692-17479670
CREB5	RASD1	chr17-17535706-17536611
CREB5	RASD1	chr17-17564665-17565250
CREB5	RHBDL3	chr17-32167655-32168542
CREB5	RHBDL3	chr17-32261301-32263128
CREB5	RHBDL3	chr17-32285023-32286902
CREB5	RHBDL3	chr17-32302829-32304459
CREB5	TOP2A	chr17-40304658-40305311
CREB5	TOP2A	chr17-40419718-40420543
CREB5	ANKFN1	chr17-55783667-55784589
CREB5	ANKFN1	chr17-56075177-56076066
CREB5	ANKFN1	chr17-56394139-56395149
CREB5	PPM1E	chr17-58666913-58667295
CREB5	PPM1E	chr17-58671258-58672624
CREB5	PPM1E	chr17-58964999-58965693
CREB5	BRIP1	chr17-61583000-61584202
CREB5	CEP112	chr17-65658966-65659930
CREB5	CEP112	chr17-66200416-66201351
CREB5	PRKCA	chr17-66354202-66355601
CREB5	PRKCA	chr17-66363450-66366242
CREB5	PRKCA	chr17-66420525-66421512
CREB5	PRKCA	chr17-66423409-66424370
CREB5	PRKCA	chr17-66451447-66452369
CREB5	PRKCA	chr17-66461571-66462543
CREB5	PRKCA	chr17-66515244-66515971
CREB5	PRKCA	chr17-66523519-66524467
CREB5	PRKCA	chr17-66566940-66567863
CREB5	PRKCA	chr17-66578561-66579484
CREB5	PRKCA	chr17-66624965-66625854
CREB5	PRKCA	chr17-66632557-66634073
CREB5	PRKCA	chr17-66714347-66718459
CREB5	CASC17	chr17-71032393-71034154
CREB5	CASC17	chr17-71260316-71261186
CREB5	SOX9-AS1	chr17-71975319-71975811
CREB5	SOX9-AS1	chr17-72126517-72127504
CREB5	SOX9-AS1	chr17-72204627-72206916
CREB5	SOX9-AS1	chr17-72211712-72212725
CREB5	SOX9-AS1	chr17-72215317-72216220
CREB5	SOX9-AS1	chr17-72272977-72273932
CREB5	SOX9-AS1	chr17-72314098-72314991
CREB5	LINC00511	chr17-72272977-72273932
CREB5	LINC00511	chr17-72314098-72314991
CREB5	LINC00511	chr17-72341704-72342939
CREB5	LINC00511	chr17-72422458-72422784
CREB5	LINC00511	chr17-72514700-72518039
CREB5	LINC00511	chr17-72545878-72546372
CREB5	LINC00511	chr17-72556674-72557704
CREB5	LINC00511	chr17-72571293-72573182
CREB5	LINC00511	chr17-72660609-72662122
CREB5	LINC00511	chr17-72715796-72716815
CREB5	LINC00511	chr17-72734341-72735359
CREB5	ID2	chr2-8659401-8660585
CREB5	GREB1	chr2-11407809-11408742
CREB5	GREB1	chr2-11473240-11474524
CREB5	GREB1	chr2-11582302-11583260
CREB5	CLIP4	chr2-29147616-29148591
CREB5	CLIP4	chr2-29168935-29169875
CREB5	LTBP1	chr2-32926694-32927126
CREB5	LTBP1	chr2-32946118-32946971
CREB5	LTBP1	chr2-33011060-33011866
CREB5	LTBP1	chr2-33086190-33087014
CREB5	LTBP1	chr2-33108315-33109304
CREB5	LTBP1	chr2-33214436-33215574
CREB5	CYP1B1	chr2-38012650-38013491
CREB5	CYP1B1	chr2-38202372-38203362
CREB5	SLC8A1	chr2-40225501-40227189
CREB5	SLC8A1	chr2-40239811-40240680
CREB5	SLC8A1	chr2-40287247-40288268
CREB5	SLC8A1	chr2-40363276-40365342
CREB5	SLC8A1	chr2-40371349-40372320
CREB5	SLC8A1	chr2-40411802-40412738
CREB5	SLC8A1	chr2-40431028-40431923
CREB5	SLC8A1	chr2-40433504-40434350
CREB5	SLC8A1	chr2-40447975-40449051
CREB5	SLC8A1	chr2-40470837-40471801
CREB5	EPAS1	chr2-46228919-46230693
CREB5	EPAS1	chr2-46330027-46332630
CREB5	LHCGR	chr2-48598514-48599252
CREB5	LHCGR	chr2-48699131-48700096
CREB5	LHCGR	chr2-48759501-48761544
CREB5	LHCGR	chr2-48780947-48781900
CREB5	MIR217HG	chr2-56000226-56001172
CREB5	MIR217HG	chr2-56118232-56119131
CREB5	MIR217HG	chr2-56126967-56128570
CREB5	AC011306.1	chr2-56000226-56001172
CREB5	AC011306.1	chr2-56118232-56119131
CREB5	AC011306.1	chr2-56126967-56128570
CREB5	VRK2	chr2-57875364-57876401
CREB5	LRRTM4	chr2-76692641-76693625
CREB5	LRRTM4	chr2-76953429-76954382
CREB5	LRRTM4	chr2-77008672-77009450
CREB5	LRRTM4	chr2-77310160-77311075
CREB5	LRRTM4	chr2-77552756-77553623
CREB5	ST6GAL2	chr2-106882432-106883372
CREB5	ST6GAL2	chr2-106956127-106957329
CREB5	AC096669.1	chr2-107266709-107267463
CREB5	AC096669.1	chr2-107306776-107307597
CREB5	AC096669.1	chr2-107388840-107389925
CREB5	FBLN7	chr2-112047472-112048275
CREB5	NCKAP5	chr2-132650866-132651795
CREB5	NCKAP5	chr2-132813046-132814030
CREB5	NCKAP5	chr2-132911477-132912557
CREB5	NCKAP5	chr2-132915681-132916744
CREB5	NCKAP5	chr2-132943604-132944500
CREB5	NCKAP5	chr2-132950869-132951857
CREB5	NCKAP5	chr2-133043236-133044120
CREB5	NCKAP5	chr2-133247596-133248323
CREB5	NCKAP5	chr2-133342250-133343398
CREB5	NCKAP5	chr2-133343708-133344491
CREB5	NCKAP5	chr2-133361698-133362628
CREB5	NCKAP5	chr2-133420914-133423719
CREB5	NCKAP5	chr2-133568464-133570109
CREB5	NCKAP5	chr2-133598514-133601120
CREB5	NCKAP5	chr2-133603402-133605980
CREB5	NCKAP5	chr2-133606575-133607333
CREB5	NCKAP5	chr2-133642514-133643522
CREB5	GALNT13	chr2-154217494-154218403
CREB5	GALNT13	chr2-154225471-154227576
CREB5	GALNT13	chr2-154243354-154244367
CREB5	PKP4	chr2-158455968-158456414
CREB5	PKP4	chr2-158501105-158502041
CREB5	PKP4	chr2-158502702-158503638
CREB5	PKP4	chr2-158517691-158518720
CREB5	PKP4	chr2-158530329-158531231
CREB5	PKP4	chr2-158649608-158651118
CREB5	TANC1	chr2-158935257-158936244
CREB5	TANC1	chr2-158953654-158954586
CREB5	TANC1	chr2-158984472-158985468
CREB5	TANC1	chr2-158998350-158999396
CREB5	TANC1	chr2-159001582-159003228
CREB5	TANC1	chr2-159012301-159013828
CREB5	TANC1	chr2-159035689-159036697
CREB5	TANC1	chr2-159051667-159054671
CREB5	TANC1	chr2-159101550-159102494
CREB5	TANC1	chr2-159111209-159112123
CREB5	TANC1	chr2-159118205-159120463
CREB5	TANC1	chr2-159137356-159138799
CREB5	TANC1	chr2-159202438-159203366
CREB5	FAP	chr2-162153281-162154277
CREB5	KCNH7	chr2-162890408-162891453
CREB5	FIGN	chr2-163637648-163638856
CREB5	FIGN	chr2-163669782-163670694
CREB5	FIGN	chr2-163675171-163676096
CREB5	SCN1A	chr2-166118560-166119546
CREB5	STK39	chr2-167862462-167863593
CREB5	STK39	chr2-167875201-167875995
CREB5	STK39	chr2-167986533-167987824
CREB5	STK39	chr2-168178528-168181891
CREB5	STK39	chr2-168186021-168186391
CREB5	STK39	chr2-168278078-168278997
CREB5	STK39	chr2-168300993-168302009
CREB5	CERS6	chr2-168419868-168420712
CREB5	CERS6	chr2-168543975-168546317
CREB5	CERS6	chr2-168648888-168649711
CREB5	LRP2	chr2-169104909-169106289
CREB5	LRP2	chr2-169254612-169255591
CREB5	LRP2	chr2-169284999-169286215
CREB5	LRP2	chr2-169286738-169287550
CREB5	LRP2	chr2-169295117-169295688
CREB5	LRP2	chr2-169362686-169365439
CREB5	LRP2	chr2-169409414-169410418
CREB5	LRP2	chr2-169415018-169416048
CREB5	PPP1R1C	chr2-181925397-181926180
CREB5	PPP1R1C	chr2-181987922-181988748
CREB5	PPP1R1C	chr2-182077375-182078380
CREB5	CALCRL	chr2-187429690-187430655
CREB5	CALCRL	chr2-187452790-187453698
CREB5	CALCRL	chr2-187500765-187501704
CREB5	CALCRL	chr2-187510535-187511291
CREB5	HECW2	chr2-196364928-196365867
CREB5	HECW2	chr2-196413456-196414709
CREB5	PARD3B	chr2-204454842-204455646
CREB5	PARD3B	chr2-204579126-204580041
CREB5	PARD3B	chr2-204585667-204586622
CREB5	PARD3B	chr2-204915587-204916470
CREB5	PARD3B	chr2-204966965-204967993
CREB5	PARD3B	chr2-205444041-205445062
CREB5	PARD3B	chr2-205482739-205483580
CREB5	PTH2R	chr2-208267547-208268245
CREB5	PTH2R	chr2-208382520-208383320
CREB5	PTH2R	chr2-208500863-208501939
CREB5	PTH2R	chr2-208584091-208585425
CREB5	MAP2	chr2-209424277-209427116
CREB5	MAP2	chr2-209469809-209470744
CREB5	MAP2	chr2-209478180-209479078
CREB5	MAP2	chr2-209577339-209579314
CREB5	DIRC3	chr2-217249534-217250834
CREB5	DIRC3	chr2-217288258-217288983
CREB5	DIRC3	chr2-217370673-217372683
CREB5	DIRC3	chr2-217621720-217623433
CREB5	DIRC3	chr2-217648125-217649211
CREB5	DIRC3	chr2-217694928-217695811
CREB5	DIRC3	chr2-217729392-217730368
CREB5	DIRC3	chr2-217792392-217793406
CREB5	DOCK10	chr2-224722494-224723391
CREB5	DOCK10	chr2-224782330-224782419
CREB5	DOCK10	chr2-224789727-224790556
CREB5	DOCK10	chr2-224908364-224910659
CREB5	DOCK10	chr2-224944448-224945570
CREB5	DOCK10	chr2-225121884-225122443
CREB5	NYAP2	chr2-225354046-225354980
CREB5	NYAP2	chr2-225649754-225650672
CREB5	PID1	chr2-228796274-228797147
CREB5	PID1	chr2-229205301-229207309
CREB5	PID1	chr2-229368448-229369144
CREB5	DNER	chr2-229368448-229369144
CREB5	DNER	chr2-229417672-229418107
CREB5	DNER	chr2-229421844-229422815
CREB5	DNER	chr2-229429856-229430838
CREB5	DNER	chr2-229439671-229440401
CREB5	DNER	chr2-229517993-229518976
CREB5	DNER	chr2-229519147-229520147
CREB5	DNER	chr2-229572660-229573570
CREB5	DNER	chr2-229675212-229676125
CREB5	RBFOX1	chr16-6023202-6024185
CREB5	RBFOX1	chr16-6513698-6514702
CREB5	RBFOX1	chr16-6860127-6860828
CREB5	RBFOX1	chr16-6881783-6882733
CREB5	RBFOX1	chr16-7227084-7228119
CREB5	RBFOX1	chr16-7233695-7234581
CREB5	RBFOX1	chr16-7321491-7322677
CREB5	RBFOX1	chr16-7376265-7377131
CREB5	RBFOX1	chr16-7584223-7585129
CREB5	RBFOX1	chr16-7644847-7645823
CREB5	CRYM	chr16-21284105-21284394
CREB5	TOX3	chr16-52434801-52437843
CREB5	TOX3	chr16-52557041-52557997
CREB5	HYDIN	chr16-70756951-70757875
CREB5	HYDIN	chr16-70800397-70800796
CREB5	HYDIN	chr16-71289716-71290308
CREB5	HYDIN	chr16-71326535-71327567
CREB5	LINC01572	chr16-72209821-72211305
CREB5	LINC01572	chr16-72225726-72226745
CREB5	LINC01572	chr16-72473916-72474847
CREB5	LINC01572	chr16-72760291-72761136
CREB5	PSD3	chr8-18549801-18550769
CREB5	PSD3	chr8-18682421-18683149
CREB5	PSD3	chr8-18822126-18823017
CREB5	PSD3	chr8-18854375-18855361
CREB5	PSD3	chr8-18878092-18878773
CREB5	PSD3	chr8-18887035-18887489
CREB5	PSD3	chr8-18910531-18911693
CREB5	PSD3	chr8-18954467-18955398
CREB5	PSD3	chr8-18957114-18958230
CREB5	PSD3	chr8-18978313-18979387
CREB5	PSD3	chr8-19046589-19050542
CREB5	PSD3	chr8-19093531-19095446
CREB5	PPP3CC	chr8-22392427-22392829
CREB5	PPP3CC	chr8-22424671-22425647
CREB5	NRG1	chr8-31677842-31678640
CREB5	NRG1	chr8-31950380-31951753
CREB5	NRG1	chr8-32013218-32014071
CREB5	NRG1	chr8-32063950-32065015
CREB5	NRG1	chr8-32072795-32073698
CREB5	NRG1	chr8-32108567-32109755
CREB5	NRG1	chr8-32219568-32220927
CREB5	NRG1	chr8-32421056-32421945
CREB5	NRG1	chr8-32467389-32468377
CREB5	NRG1	chr8-32585003-32585971
CREB5	NRG1	chr8-32650151-32651345
CREB5	NRG1	chr8-32724906-32725758
CREB5	SPIDR	chr8-47187866-47189826
CREB5	SPIDR	chr8-47292628-47293721
CREB5	SPIDR	chr8-47304572-47305590
CREB5	SPIDR	chr8-47384298-47385170
CREB5	SPIDR	chr8-47511923-47513011
CREB5	SPIDR	chr8-47524241-47525076
CREB5	FAM110B	chr8-57992600-57993382
CREB5	FAM110B	chr8-58128924-58129971
CREB5	FAM110B	chr8-58145292-58145906
CREB5	TOX	chr8-58882483-58883390
CREB5	TOX	chr8-58922440-58923351
CREB5	TOX	chr8-58982489-58983274
CREB5	TOX	chr8-59018653-59019646
CREB5	TOX	chr8-59029040-59030764
CREB5	TOX	chr8-59049641-59050567
CREB5	TOX	chr8-59077164-59078096
CREB5	TOX	chr8-59106222-59109885
CREB5	TOX	chr8-59123394-59124727
CREB5	TOX	chr8-59201961-59202762
CREB5	ASPH	chr8-61710660-61711597
CREB5	ASPH	chr8-61733173-61734163
CREB5	ASPH	chr8-61745457-61747179
CREB5	ASPH	chr8-61791760-61792711
CREB5	NKAIN3	chr8-62582278-62583171
CREB5	NKAIN3	chr8-62695978-62696725
CREB5	NKAIN3	chr8-62867265-62869017
CREB5	CPA6	chr8-67375634-67376598
CREB5	CPA6	chr8-67764726-67765840
CREB5	PREX2	chr8-67951308-67952117
CREB5	PREX2	chr8-68006390-68007222
CREB5	SULF1	chr8-69448245-69448365
CREB5	SULF1	chr8-69506350-69507319
CREB5	SULF1	chr8-69536666-69537183
CREB5	KCNB2	chr8-72634793-72635769
CREB5	KCNB2	chr8-72675406-72676275
CREB5	KCNB2	chr8-72682789-72683781
CREB5	KCNB2	chr8-72894833-72895657
CREB5	KCNB2	chr8-72912719-72913747
CREB5	KCNB2	chr8-72928723-72929869
CREB5	ZFHX4	chr8-76664918-76666060
CREB5	ZFHX4	chr8-76693507-76695314
CREB5	ZFHX4	chr8-76698475-76700711
CREB5	ZFHX4	chr8-76707090-76707545
CREB5	ZFHX4	chr8-76726672-76728353
CREB5	ZFHX4	chr8-76736465-76737434
CREB5	ZFHX4	chr8-76840040-76842429
CREB5	ZFHX4	chr8-76842793-76843584
CREB5	ZFHX4	chr8-76844880-76845835
CREB5	STMN2	chr8-79658286-79659245
CREB5	PAG1	chr8-80966347-80967275
CREB5	PAG1	chr8-81050428-81051523
CREB5	PAG1	chr8-81052147-81053127
CREB5	PAG1	chr8-81106895-81107972
CREB5	RALYL	chr8-84174892-84175854
CREB5	RALYL	chr8-84216640-84217540
CREB5	RALYL	chr8-84360991-84361928
CREB5	RALYL	chr8-84365704-84366478
CREB5	RALYL	chr8-84492347-84493333
CREB5	RALYL	chr8-84584562-84585559
CREB5	RALYL	chr8-84860123-84860970
CREB5	NIPAL2	chr8-98163443-98165638
CREB5	NIPAL2	chr8-98245562-98246452
CREB5	NIPAL2	chr8-98282425-98283338
CREB5	NIPAL2	chr8-98362329-98365268
CREB5	RGS22	chr8-100016585-100017540
CREB5	RGS22	chr8-100017797-100018576
CREB5	NCALD	chr8-101603576-101604700
CREB5	NCALD	chr8-101657543-101658651
CREB5	NCALD	chr8-101699572-101700505
CREB5	NCALD	chr8-101744526-101745816
CREB5	NCALD	chr8-101769576-101770808
CREB5	NCALD	chr8-101816260-101818514
CREB5	NCALD	chr8-101839371-101840299
CREB5	NCALD	chr8-101867632-101868616
CREB5	NCALD	chr8-101939095-101939944
CREB5	NCALD	chr8-102044738-102045683
CREB5	LRRC6	chr8-132486345-132488508
CREB5	ST3GAL1	chr8-133501641-133502637
CREB5	GNG7	chr19-2456997-2457821
CREB5	GNG7	chr19-2469182-2470100
CREB5	GNG7	chr19-2493974-2495847
CREB5	GNG7	chr19-2550435-2551471
CREB5	GNG7	chr19-2598832-2599812
CREB5	GNG7	chr19-2702710-2703427
CREB5	GNG7	chr19-2721419-2723673
CREB5	GNG7	chr19-2771575-2772786
CREB5	GNG7	chr19-2791031-2792716
CREB5	PCP2	chr19-7649123-7650036
CREB5	PCP2	chr19-7670455-7671050
CREB5	PCP2	chr19-7718548-7719414
CREB5	NFIX	chr19-12944986-12945854
CREB5	NFIX	chr19-12969207-12969481
CREB5	NFIX	chr19-12982981-12986480
CREB5	NFIX	chr19-13049298-13049699
CREB5	NFIX	chr19-13070070-13073046
CREB5	CPAMD8	chr19-17078313-17080844
CREB5	ZNF730	chr19-23117177-23118621
CREB5	TSHZ3	chr19-31263425-31263651
CREB5	TSHZ3	chr19-31288983-31289884
CREB5	TSHZ3	chr19-31346108-31349179
CREB5	TSHZ3	chr19-31419682-31421996
CREB5	TSHZ3	chr19-31447955-31448926
CREB5	RHPN2	chr19-33031874-33032804
CREB5	GLIS3	chr9-3768795-3769701
CREB5	GLIS3	chr9-3845543-3846348
CREB5	GLIS3	chr9-3849889-3851007
CREB5	GLIS3	chr9-3916170-3917196
CREB5	GLIS3	chr9-4027326-4028306
CREB5	GLIS3	chr9-4132031-4133056
CREB5	GLIS3	chr9-4235571-4236495
CREB5	KDM4C	chr9-6715684-6716494
CREB5	KDM4C	chr9-6742676-6743661
CREB5	KDM4C	chr9-6952945-6953756
CREB5	KDM4C	chr9-7104515-7105401
CREB5	KDM4C	chr9-7137086-7137895
CREB5	KDM4C	chr9-7153727-7154687
CREB5	KDM4C	chr9-7171790-7173018
CREB5	NFIB	chr9-14153074-14153972
CREB5	NFIB	chr9-14232794-14233209
CREB5	NFIB	chr9-14251054-14252045
CREB5	NFIB	chr9-14269067-14269886
CREB5	NFIB	chr9-14273140-14274776
CREB5	NFIB	chr9-14301155-14302035
CREB5	NFIB	chr9-14309060-14310022
CREB5	NFIB	chr9-14395252-14396587
CREB5	MLLT3	chr9-20478541-20479522
CREB5	MLLT3	chr9-20603233-20604171
CREB5	MLLT3	chr9-20640188-20641147
CREB5	TRPM3	chr9-70472087-70473018
CREB5	TRPM3	chr9-70594320-70595201
CREB5	TRPM3	chr9-70668549-70669478
CREB5	TRPM3	chr9-70893332-70894220
CREB5	TRPM3	chr9-70979106-70980741
CREB5	TRPM3	chr9-71101405-71102275
CREB5	TRPM3	chr9-71121599-71122947
CREB5	TRPM3	chr9-71265260-71266178
CREB5	ALDH1A1	chr9-72818254-72818678
CREB5	ALDH1A1	chr9-72827897-72828917
CREB5	ALDH1A1	chr9-72872491-72873026
CREB5	ALDH1A1	chr9-73050567-73051553
CREB5	ALDH1A1	chr9-73131990-73132940
CREB5	ALDH1A1	chr9-73137062-73137865
CREB5	PCSK5	chr9-75909523-75910459
CREB5	PCSK5	chr9-76009434-76010638
CREB5	PCSK5	chr9-76292276-76292898
CREB5	ROR2	chr9-91514825-91515767
CREB5	ROR2	chr9-91571811-91572788
CREB5	ROR2	chr9-91643739-91644565
CREB5	ROR2	chr9-91690475-91691451
CREB5	ROR2	chr9-91775819-91776033
CREB5	ROR2	chr9-91882303-91883154
CREB5	ROR2	chr9-91948058-91948606
CREB5	WNK2	chr9-93093444-93096217
CREB5	WNK2	chr9-93131542-93134142
CREB5	WNK2	chr9-93177469-93178560
CREB5	PLPPR1	chr9-101054352-101056163
CREB5	PLPPR1	chr9-101160555-101161404
CREB5	PLPPR1	chr9-101270069-101270658
CREB5	PLPPR1	chr9-101311227-101312331
CREB5	FRRS1L	chr9-109072558-109073247
CREB5	FRRS1L	chr9-109109727-109110682
CREB5	LPAR1	chr9-111099036-111100126
CREB5	SH2D3C	chr9-127678533-127679009
CREB5	SH2D3C	chr9-127753012-127754835
CREB5	SH2D3C	chr9-127767708-127768692
CREB5	SH2D3C	chr9-127780120-127781970
CREB5	SH2D3C	chr9-127782766-127785678
CREB5	SH2D3C	chr9-127794813-127797583
CREB5	SH2D3C	chr9-127808890-127809683
CREB5	FLT1	chr13-28295351-28296280
CREB5	FLT1	chr13-28308435-28308842
CREB5	FLT1	chr13-28495129-28495968
CREB5	FLT1	chr13-28503219-28504194
CREB5	MTUS2	chr13-28796131-28797142
CREB5	MTUS2	chr13-28822120-28823048
CREB5	MTUS2	chr13-29161447-29162220
CREB5	MTUS2	chr13-29317707-29318532
CREB5	MTUS2	chr13-29424648-29424937
CREB5	B3GLCT	chr13-31162389-31163290
CREB5	FRY	chr13-32205063-32206038
CREB5	FRY	chr13-32206138-32207167
CREB5	FRY	chr13-32207172-32207896
CREB5	DCLK1	chr13-35839624-35840578
CREB5	DCLK1	chr13-35961870-35962687
CREB5	DCLK1	chr13-35984020-35985896
CREB5	DCLK1	chr13-36163355-36164330
CREB5	TSC22D1	chr13-44394363-44395317
CREB5	TSC22D1	chr13-44402527-44404354
CREB5	TSC22D1	chr13-44435285-44435792
CREB5	DLEU1	chr13-50123466-50128484
CREB5	DLEU1	chr13-50244261-50245216
CREB5	DLEU1	chr13-50357360-50358914
CREB5	DLEU1	chr13-50470184-50470852
CREB5	DLEU1	chr13-50592134-50593014
CREB5	DLEU1	chr13-50677469-50678441
CREB5	WDFY2	chr13-51717617-51719197
CREB5	WDFY2	chr13-51744550-51746203
CREB5	PCDH17	chr13-57627319-57628270
CREB5	PCDH17	chr13-57641281-57642198
CREB5	PCDH17	chr13-57652851-57654537
CREB5	PCDH17	chr13-57666009-57666467
CREB5	DIAPH3	chr13-59643064-59644096
CREB5	DIAPH3	chr13-59964881-59965805
CREB5	DIAPH3	chr13-60163325-60163586
CREB5	DIAPH3	chr13-60229473-60230453
CREB5	PCDH9	chr13-66341150-66342175
CREB5	PCDH9	chr13-66405624-66406583
CREB5	PCDH9	chr13-66655607-66658013
CREB5	PCDH9	chr13-66888090-66888795
CREB5	PCDH9	chr13-67069133-67070168
CREB5	PCDH9	chr13-67119622-67119861
CREB5	SLAIN1	chr13-77729386-77730403
CREB5	SLAIN1	chr13-77741619-77742685
CREB5	MIR4500HG	chr13-87661112-87662061
CREB5	GPC6	chr13-93226109-93226841
CREB5	GPC6	chr13-93343878-93346726
CREB5	GPC6	chr13-93450746-93450999
CREB5	GPC6	chr13-93461570-93462521
CREB5	GPC6	chr13-93622661-93623638
CREB5	GPC6	chr13-93629533-93630360
CREB5	GPC6	chr13-93646713-93648153
CREB5	GPC6	chr13-93777696-93778535
CREB5	GPC6	chr13-94328038-94329222
CREB5	GPC6	chr13-94362127-94363154
CREB5	NALCN	chr13-100982849-100984894
CREB5	NALCN	chr13-101514426-101515355
CREB5	MYO16	chr13-108527797-108528798
CREB5	MYO16	chr13-108678784-108679703
CREB5	MYO16	chr13-108706715-108707704
CREB5	MYO16	chr13-108940291-108940878
CREB5	MYO16	chr13-108941802-108942812
CREB5	MYO16	chr13-109123655-109124807
CREB5	HEATR5A	chr14-31354618-31355509
CREB5	HEATR5A	chr14-31457511-31458913
CREB5	HEATR5A	chr14-31509856-31510890
CREB5	NPAS3	chr14-32986547-32987551
CREB5	NPAS3	chr14-33030150-33031148
CREB5	NPAS3	chr14-33240669-33242092
CREB5	NPAS3	chr14-33385310-33386035
CREB5	NPAS3	chr14-33393545-33394526
CREB5	NPAS3	chr14-33467553-33468786
CREB5	NPAS3	chr14-33480371-33481410
CREB5	NPAS3	chr14-33678090-33678977
CREB5	NPAS3	chr14-33699693-33700695
CREB5	NPAS3	chr14-33727781-33728729
CREB5	MDGA2	chr14-47055981-47056980
CREB5	MDGA2	chr14-47722763-47723723
CREB5	MDGA2	chr14-47730098-47731242
CREB5	TRIM9	chr14-50931997-50933434
CREB5	TRIM9	chr14-50980282-50981215
CREB5	TRIM9	chr14-50998189-50999081
CREB5	TRIM9	chr14-51039942-51040709
CREB5	TRIM9	chr14-51084495-51085441
CREB5	TRIM9	chr14-51086661-51087501
CREB5	TRIM9	chr14-51138710-51139737
CREB5	TRIM9	chr14-51185920-51186816
CREB5	GPR137C	chr14-52522333-52523308
CREB5	GPR137C	chr14-52550834-52552315
CREB5	RHOJ	chr14-63203882-63204113
CREB5	RHOJ	chr14-63223943-63224880
CREB5	SIPA1L1	chr14-71228400-71229270
CREB5	SIPA1L1	chr14-71465772-71467184
CREB5	SIPA1L1	chr14-71551239-71552233
CREB5	SIPA1L1	chr14-71666545-71667508
CREB5	SIPA1L1	chr14-71725554-71726403
CREB5	FOS	chr14-75181104-75182233
CREB5	FOS	chr14-75257944-75260319
CREB5	FOS	chr14-75275975-75278773
CREB5	NRXN3	chr14-78163926-78164820
CREB5	NRXN3	chr14-78194420-78195234
CREB5	NRXN3	chr14-78226876-78228229
CREB5	NRXN3	chr14-78468958-78469895
CREB5	NRXN3	chr14-78683769-78684643
CREB5	NRXN3	chr14-78705886-78706820
CREB5	NRXN3	chr14-78709826-78710936
CREB5	NRXN3	chr14-78862886-78863800
CREB5	NRXN3	chr14-78888762-78889854
CREB5	NRXN3	chr14-78968865-78969996
CREB5	NRXN3	chr14-78970456-78971369
CREB5	NRXN3	chr14-78985466-78986411
CREB5	NRXN3	chr14-79021340-79022261
CREB5	NRXN3	chr14-79294294-79295107
CREB5	NRXN3	chr14-79437299-79438237
CREB5	NRXN3	chr14-79605487-79606423
CREB5	NRXN3	chr14-79708672-79709890
CREB5	NRXN3	chr14-79852730-79853538
CREB5	CALM1	chr14-90344083-90344933
CREB5	CALM1	chr14-90355232-90356223
CREB5	CCDC88C	chr14-91257203-91258298
CREB5	CCDC88C	chr14-91329435-91330880
CREB5	PRIMA1	chr14-93645069-93645976
CREB5	PRIMA1	chr14-93803616-93804538
CREB5	PRIMA1	chr14-93856479-93858166
CREB5	MEG8	chr14-100782378-100784973
CREB5	FBXL7	chr5-15473784-15474686
CREB5	FBXL7	chr5-15573089-15573910
CREB5	FBXL7	chr5-15605890-15606880
CREB5	FBXL7	chr5-15680243-15681169
CREB5	FBXL7	chr5-15687113-15688041
CREB5	FBXL7	chr5-15719783-15720743
CREB5	FBXL7	chr5-15763600-15764440
CREB5	CDH12	chr5-21925770-21926676
CREB5	CDH12	chr5-22053102-22054006
CREB5	CDH12	chr5-22094228-22095038
CREB5	CDH12	chr5-22162612-22163390
CREB5	CDH12	chr5-22163963-22165945
CREB5	CDH12	chr5-22167819-22168382
CREB5	CDH12	chr5-22212133-22212201
CREB5	CDH6	chr5-31267702-31269388
CREB5	PRLR	chr5-35245777-35247943
CREB5	SLC1A3	chr5-36656247-36657177
CREB5	HMGCS1	chr5-43302870-43303942
CREB5	MAP3K1	chr5-56800190-56801088
CREB5	ARHGEF28	chr5-73619713-73620653
CREB5	ARHGEF28	chr5-73625412-73626157
CREB5	ARHGEF28	chr5-73636409-73638270
CREB5	ARHGEF28	chr5-73656339-73657220
CREB5	ARHGEF28	chr5-73786125-73787073
CREB5	IQGAP2	chr5-76608625-76609094
CREB5	VCAN	chr5-83405542-83406442
CREB5	VCAN	chr5-83467223-83468146
CREB5	MEF2C	chr5-88667592-88668500
CREB5	MEF2C	chr5-88684937-88686554
CREB5	MEF2C	chr5-88688839-88690912
CREB5	MEF2C	chr5-88729520-88730210
CREB5	MEF2C	chr5-88824915-88825648
CREB5	ADGRV1	chr5-90546855-90547702
CREB5	ADGRV1	chr5-90598007-90598953
CREB5	ADGRV1	chr5-90688795-90689682
CREB5	ADGRV1	chr5-90865983-90866954
CREB5	ADGRV1	chr5-90962245-90963194
CREB5	SLF1	chr5-94522388-94523247
CREB5	SLF1	chr5-94544878-94545821
CREB5	SLF1	chr5-94546194-94546999
CREB5	SLF1	chr5-94562156-94563153
CREB5	ELL2	chr5-95940495-95942422
CREB5	ELL2	chr5-95962072-95963197
CREB5	EFNA5	chr5-107375569-107376347
CREB5	EFNA5	chr5-107388554-107389961
CREB5	EFNA5	chr5-107415518-107416549
CREB5	EFNA5	chr5-107417784-107418759
CREB5	EFNA5	chr5-107465883-107466921
CREB5	EFNA5	chr5-107467268-107468202
CREB5	EFNA5	chr5-107502311-107503342
CREB5	EFNA5	chr5-107511791-107512665
CREB5	EFNA5	chr5-107532079-107534532
CREB5	EFNA5	chr5-107538600-107540439
CREB5	EFNA5	chr5-107607625-107608578
CREB5	EFNA5	chr5-107668639-107670488
CREB5	SEMA6A	chr5-116550647-116551564
CREB5	SEMA6A	chr5-116553064-116554049
CREB5	SEMA6A	chr5-116564711-116565682
CREB5	SEMA6A	chr5-116609007-116609984
CREB5	SEMA6A	chr5-116625887-116626871
CREB5	SEMA6A	chr5-116654912-116656023
CREB5	2023-03-03	chr5-126776487-126776622
CREB5	2023-03-03	chr5-126809834-126810179
CREB5	2023-03-03	chr5-126845386-126849572
CREB5	2023-03-03	chr5-127018899-127020050
CREB5	2023-03-03	chr5-127068539-127069469
CREB5	2023-03-03	chr5-127094103-127095036
CREB5	FBN2	chr5-128247900-128248757
CREB5	FBN2	chr5-128253524-128254440
CREB5	CHSY3	chr5-129963192-129964057
CREB5	CHSY3	chr5-130115606-130116895
CREB5	SPOCK1	chr5-137086100-137087111
CREB5	SPOCK1	chr5-137121735-137122736
CREB5	SPOCK1	chr5-137144048-137147136
CREB5	SPOCK1	chr5-137305814-137307138
CREB5	SPOCK1	chr5-137506082-137507202
CREB5	SPOCK1	chr5-137582776-137583769
CREB5	SPOCK1	chr5-137648958-137649897
CREB5	EGR1	chr5-138448031-138450883
CREB5	UBE2D2	chr5-139444492-139444815
CREB5	UBE2D2	chr5-139487885-139488881
CREB5	UBE2D2	chr5-139492491-139493229
CREB5	UBE2D2	chr5-139531100-139532398
CREB5	C5orf46	chr5-147906539-147907109
CREB5	C5orf46	chr5-147963883-147964844
CREB5	GPX3	chr5-151003315-151004057
CREB5	GPX3	chr5-151007470-151008408
CREB5	GRIA1	chr5-153487618-153488507
CREB5	GRIA1	chr5-153505813-153506730
CREB5	GRIA1	chr5-153526650-153527813
CREB5	GRIA1	chr5-153555377-153556259
CREB5	GRIA1	chr5-153595703-153597511
CREB5	GRIA1	chr5-153690109-153691218
CREB5	GRIA1	chr5-153756123-153757010
CREB5	CPEB4	chr5-173850852-173851788
CREB5	CPEB4	chr5-173860606-173860947
CREB5	CPEB4	chr5-173918255-173920512
CREB5	CPEB4	chr5-173921013-173921888
CREB5	COL23A1	chr5-178169184-178170152
CREB5	COL23A1	chr5-178329994-178332380
CREB5	COL23A1	chr5-178347975-178352059
CREB5	COL23A1	chr5-178361615-178362201
CREB5	COL23A1	chr5-178364700-178366070
CREB5	COL23A1	chr5-178376645-178377664
CREB5	COL23A1	chr5-178413516-178414551
CREB5	COL23A1	chr5-178544920-178545837
CREB5	COL23A1	chr5-178627115-178628062
CREB5	MICAL3	chr22-17926900-17927839
CREB5	MICAL3	chr22-17942016-17947539
CREB5	MICAL3	chr22-18055814-18056811
CREB5	SGSM1	chr22-24814305-24815135
CREB5	SGSM1	chr22-24834901-24835969
CREB5	SGSM1	chr22-24859086-24859715
CREB5	OSBP2	chr22-30763539-30764252
CREB5	OSBP2	chr22-30822710-30823402
CREB5	OSBP2	chr22-30850743-30851508
CREB5	OSBP2	chr22-30870946-30872308
CREB5	ADARB2	chr10-1200386-1201811
CREB5	ADARB2	chr10-1243548-1244506
CREB5	ADARB2	chr10-1271674-1272827
CREB5	ADARB2	chr10-1391749-1392830
CREB5	ADARB2	chr10-1459160-1460076
CREB5	ADARB2	chr10-1460793-1462561
CREB5	ADARB2	chr10-1522187-1523202
CREB5	ADARB2	chr10-1539749-1540584
CREB5	ADARB2	chr10-1545973-1547411
CREB5	ADARB2	chr10-1570205-1571145
CREB5	ADARB2	chr10-1643411-1644896
CREB5	ADARB2	chr10-1687510-1688913
CREB5	ADARB2	chr10-1743049-1743928
CREB5	ADARB2	chr10-1790392-1791386
CREB5	FRMD4A	chr10-13614492-13615391
CREB5	FRMD4A	chr10-13615516-13616397
CREB5	FRMD4A	chr10-13649745-13650652
CREB5	FRMD4A	chr10-13716059-13717283
CREB5	FRMD4A	chr10-13787459-13791013
CREB5	FRMD4A	chr10-13826113-13828063
CREB5	FRMD4A	chr10-13834303-13835798
CREB5	FRMD4A	chr10-13925894-13926653
CREB5	FRMD4A	chr10-13941745-13942740
CREB5	FRMD4A	chr10-13978544-13979456
CREB5	FRMD4A	chr10-14016689-14017345
CREB5	FRMD4A	chr10-14025491-14026408
CREB5	FRMD4A	chr10-14056392-14057440
CREB5	FRMD4A	chr10-14087637-14089916
CREB5	FRMD4A	chr10-14111024-14112803
CREB5	FRMD4A	chr10-14141107-14142000
CREB5	FRMD4A	chr10-14167277-14168797
CREB5	FRMD4A	chr10-14197902-14198714
CREB5	FRMD4A	chr10-14239964-14240923
CREB5	FRMD4A	chr10-14360236-14361195
CREB5	FRMD4A	chr10-14548671-14548985
CREB5	PLXDC2	chr10-19840435-19841255
CREB5	PLXDC2	chr10-19842076-19843122
CREB5	PLXDC2	chr10-19959814-19960569
CREB5	PLXDC2	chr10-19967919-19968835
CREB5	PLXDC2	chr10-19970025-19970956
CREB5	PLXDC2	chr10-20094253-20095220
CREB5	PLXDC2	chr10-20099979-20100917
CREB5	PLXDC2	chr10-20161846-20162720
CREB5	PLXDC2	chr10-20165763-20166781
CREB5	KIAA1217	chr10-23606048-23607250
CREB5	KIAA1217	chr10-23693110-23694745
CREB5	KIAA1217	chr10-23814426-23815193
CREB5	KIAA1217	chr10-23868011-23869970
CREB5	KIAA1217	chr10-23870161-23871035
CREB5	KIAA1217	chr10-23994146-23995128
CREB5	KIAA1217	chr10-24000201-24001183
CREB5	KIAA1217	chr10-24126582-24129826
CREB5	KIAA1217	chr10-24136864-24137782
CREB5	KIAA1217	chr10-24209264-24210730
CREB5	KIAA1217	chr10-24352856-24353769
CREB5	KIAA1217	chr10-24393083-24394047
CREB5	KIAA1217	chr10-24415422-24417533
CREB5	KIAA1217	chr10-24440740-24441832
CREB5	KIAA1217	chr10-24463771-24464685
CREB5	KIAA1217	chr10-24510284-24511419
CREB5	MPP7	chr10-28063979-28064775
CREB5	MPP7	chr10-28280143-28282009
CREB5	MPP7	chr10-28301818-28303299
CREB5	SVIL	chr10-29370144-29371250
CREB5	SVIL	chr10-29482288-29483674
CREB5	SVIL	chr10-29566521-29567616
CREB5	SVIL	chr10-29580670-29581461
CREB5	SVIL	chr10-29663579-29664487
CREB5	SVIL	chr10-29746064-29746990
CREB5	SVIL	chr10-29802664-29803522
CREB5	SVIL	chr10-29811387-29812322
CREB5	PCDH15	chr10-54194612-54195585
CREB5	PCDH15	chr10-54767832-54768676
CREB5	PCDH15	chr10-54973364-54974194
CREB5	PCDH15	chr10-55141554-55142416
CREB5	PCDH15	chr10-55423909-55424949
CREB5	PCDH15	chr10-55629621-55631896
CREB5	CTNNA3	chr10-66095355-66096220
CREB5	CTNNA3	chr10-66180296-66181308
CREB5	CTNNA3	chr10-66231391-66232269
CREB5	CTNNA3	chr10-66327038-66327952
CREB5	CTNNA3	chr10-66496383-66497383
CREB5	CTNNA3	chr10-66875254-66876093
CREB5	CTNNA3	chr10-66941045-66942079
CREB5	CTNNA3	chr10-67171731-67172684
CREB5	CTNNA3	chr10-67255040-67256955
CREB5	CTNNA3	chr10-67794766-67795674
CREB5	COL13A1	chr10-69809649-69811494
CREB5	COL13A1	chr10-69880554-69882276
CREB5	CDH23	chr10-71323129-71324063
CREB5	CDH23	chr10-71344292-71347912
CREB5	CDH23	chr10-71404201-71405367
CREB5	CDH23	chr10-71408307-71409242
CREB5	CDH23	chr10-71464555-71467628
CREB5	CDH23	chr10-71486225-71487209
CREB5	CDH23	chr10-71565290-71566215
CREB5	CDH23	chr10-71572643-71575261
CREB5	CDH23	chr10-71606412-71606471
CREB5	CDH23	chr10-71754849-71755358
CREB5	RGR	chr10-84171368-84172374
CREB5	RGR	chr10-84225590-84226022
CREB5	PLCE1	chr10-94016905-94017902
CREB5	PLCE1	chr10-94121277-94122713
CREB5	PLCE1	chr10-94319972-94320878
CREB5	SORBS1	chr10-95246278-95247214
CREB5	SORBS1	chr10-95266413-95267251
CREB5	SORBS1	chr10-95374341-95375284
CREB5	SORBS1	chr10-95390826-95391775
CREB5	SORBS1	chr10-95430117-95431175
CREB5	SORBS1	chr10-95433072-95434621
CREB5	SORBS1	chr10-95572075-95573050
CREB5	SORBS1	chr10-95656707-95657427
CREB5	ADD3	chr10-109930865-109931817
CREB5	ADD3	chr10-110000722-110001585
CREB5	MXI1	chr10-110210316-110212561
CREB5	MXI1	chr10-110221464-110222417
CREB5	MXI1	chr10-110224415-110225992
CREB5	MXI1	chr10-110265279-110266177
CREB5	MXI1	chr10-110279295-110279913
CREB5	GFRA1	chr10-116039625-116040579
CREB5	GFRA1	chr10-116053488-116054386
CREB5	GFRA1	chr10-116132423-116134031
CREB5	GFRA1	chr10-116207596-116211630
CREB5	GFRA1	chr10-116254245-116257217
CREB5	GFRA1	chr10-116269587-116270821
CREB5	GFRA1	chr10-116278509-116279868
CREB5	MKI67	chr10-128088062-128089037
CREB5	MKI67	chr10-128169615-128170645
CREB5	MKI67	chr10-128209887-128212721
CREB5	EPB41L3	chr18-5297054-5297595
CREB5	EPB41L3	chr18-5413214-5415508
CREB5	EPB41L3	chr18-5470928-5471840
CREB5	EPB41L3	chr18-5628992-5630376
CREB5	L3MBTL4	chr18-5941713-5943030
CREB5	L3MBTL4	chr18-5969563-5970440
CREB5	LAMA1	chr18-7069155-7073478
CREB5	LAMA1	chr18-7176829-7177771
CREB5	PTPRM	chr18-7577555-7578473
CREB5	PTPRM	chr18-7686328-7687250
CREB5	PTPRM	chr18-7766172-7767150
CREB5	PTPRM	chr18-7807698-7808656
CREB5	PTPRM	chr18-8083874-8084806
CREB5	PTPRM	chr18-8216812-8219010
CREB5	PTPRM	chr18-8241480-8242383
CREB5	PTPRM	chr18-8260406-8262737
CREB5	PTPRM	chr18-8279193-8280339
CREB5	CABLES1	chr18-23129746-23130563
CREB5	CABLES1	chr18-23140860-23142035
CREB5	CABLES1	chr18-23155953-23156309
CREB5	CABLES1	chr18-23183517-23183798
CREB5	CABLES1	chr18-23213161-23213976
CREB5	CABLES1	chr18-23231374-23233207
CREB5	SETBP1	chr18-44658590-44659691
CREB5	SETBP1	chr18-44789825-44790095
CREB5	SETBP1	chr18-44791215-44792084
CREB5	SETBP1	chr18-44996945-44998801
CREB5	SETBP1	chr18-45026000-45026885
CREB5	MYO5B	chr18-49767620-49768571
CREB5	MYO5B	chr18-49919609-49922785
CREB5	MYO5B	chr18-50075695-50076583
CREB5	MYO5B	chr18-50162528-50163560
CREB5	MYO5B	chr18-50183677-50184101
CREB5	MAPK4	chr18-50542102-50543059
CREB5	MAPK4	chr18-50571735-50572579
CREB5	MAPK4	chr18-50653336-50655438
CREB5	MAPK4	chr18-50679099-50680170
CREB5	DCC	chr18-52310369-52311294
CREB5	DCC	chr18-52311999-52313015
CREB5	DCC	chr18-52471945-52472855
CREB5	DCC	chr18-52694451-52695474
CREB5	DCC	chr18-52728235-52729193
CREB5	DCC	chr18-53135358-53136431
CREB5	DCC	chr18-53193852-53194782
CREB5	DCC	chr18-53230659-53231668
CREB5	DCC	chr18-53290124-53291025
CREB5	TCF4	chr18-55351317-55351794
CREB5	TCF4	chr18-55390750-55391557
CREB5	TCF4	chr18-55405575-55406493
CREB5	TCF4	chr18-55407292-55408776
CREB5	TCF4	chr18-55422513-55423518
CREB5	TCF4	chr18-55524386-55525332
CREB5	TCF4	chr18-55534485-55535417
CREB5	TCF4	chr18-55541320-55542228
CREB5	TCF4	chr18-55577515-55578559
CREB5	TCF4	chr18-55598682-55599580
CREB5	TCF4	chr18-55647321-55648178
CREB5	NEDD4L	chr18-57984405-57985389
CREB5	NEDD4L	chr18-58040553-58041753
CREB5	NEDD4L	chr18-58100930-58101903
CREB5	NEDD4L	chr18-58117541-58120541
CREB5	NEDD4L	chr18-58220963-58221534
CREB5	NEDD4L	chr18-58254679-58255439
CREB5	NEDD4L	chr18-58279861-58281679
CREB5	NEDD4L	chr18-58284679-58285605
CREB5	PHLPP1	chr18-62630869-62631821
CREB5	PHLPP1	chr18-62658601-62660080
CREB5	PHLPP1	chr18-62674098-62675186
CREB5	PHLPP1	chr18-62721787-62722752
CREB5	PHLPP1	chr18-62784789-62785724
CREB5	PHLPP1	chr18-62810491-62811363
CREB5	PHLPP1	chr18-62821557-62822442
CREB5	PHLPP1	chr18-62974957-62975396
CREB5	GABRG3	chr15-26927280-26929056
CREB5	GABRG3	chr15-26967343-26968479
CREB5	GABRG3	chr15-27085836-27087791
CREB5	GABRG3	chr15-27195656-27197575
CREB5	GABRG3	chr15-27341430-27342281
CREB5	GABRG3	chr15-27358306-27359439
CREB5	GABRG3	chr15-27454073-27455084
CREB5	GABRG3	chr15-27479499-27480381
CREB5	GABRG3	chr15-27485776-27486920
CREB5	RASGRP1	chr15-38474299-38475019
CREB5	RASGRP1	chr15-38535304-38536883
CREB5	FRMD5	chr15-43974603-43975530
CREB5	FRMD5	chr15-43989505-43990266
CREB5	FRMD5	chr15-43998310-43999276
CREB5	FRMD5	chr15-44035577-44036520
CREB5	FRMD5	chr15-44074457-44075436
CREB5	FRMD5	chr15-44188471-44189462
CREB5	FBN1	chr15-48437388-48437621
CREB5	FBN1	chr15-48449308-48450233
CREB5	FBN1	chr15-48564964-48566321
CREB5	PRTG	chr15-55648123-55649111
CREB5	TEX9	chr15-56164663-56165593
CREB5	TEX9	chr15-56241345-56242101
CREB5	CGNL1	chr15-57402888-57404251
CREB5	CGNL1	chr15-57406065-57406793
CREB5	CGNL1	chr15-57541898-57542855
CREB5	ALDH1A2	chr15-57969096-57969750
CREB5	ALDH1A2	chr15-58042820-58043789
CREB5	ALDH1A2	chr15-58212658-58213643
CREB5	ALDH1A2	chr15-58222698-58224801
CREB5	ALDH1A2	chr15-58306829-58308074
CREB5	ALDH1A2	chr15-58403362-58404308
CREB5	ALDH1A2	chr15-58492539-58493565
CREB5	AQP9	chr15-58042820-58043789
CREB5	RLBP1	chr15-89139510-89140439
CREB5	RLBP1	chr15-89150534-89151570
CREB5	RLBP1	chr15-89226449-89227393
CREB5	RLBP1	chr15-89270238-89271123
CREB5	CYYR1	chr21-26594709-26595647
CREB5	CYYR1	chr21-26635343-26636277
CREB5	ABCG1	chr21-42107247-42109293
CREB5	ABCG1	chr21-42198706-42199658
CREB5	ABCG1	chr21-42253522-42255422
CREB5	ABCG1	chr21-42265131-42265925
CREB5	ABCG1	chr21-42280720-42281942
CREB5	PDE9A	chr21-42635721-42638303
CREB5	PDE9A	chr21-42643884-42646706
CREB5	PDE9A	chr21-42661218-42669792
CREB5	PDE9A	chr21-42672086-42675965
CREB5	PDE9A	chr21-42702578-42703756
CREB5	PDE9A	chr21-42760908-42761978
E2F8	PCNA	chr20-5113104-5113765
E2F8	PCNA	chr20-5118867-5119577
E2F8	PCNA	chr20-5222767-5224597
E2F8	MCM8	chr20-5864284-5865065
E2F8	MCM8	chr20-5893458-5894051
E2F8	MGME1	chr20-17925128-17926111
E2F8	GINS1	chr20-25328827-25329651
E2F8	GINS1	chr20-25336315-25337334
E2F8	GINS1	chr20-25354717-25357168
E2F8	TPX2	chr20-31718979-31721654
E2F8	RBL1	chr20-37094952-37095772
E2F8	RBL1	chr20-37194692-37196333
E2F8	FAM83D	chr20-38829324-38830371
E2F8	MYBL2	chr20-43667304-43668142
E2F8	MYBL2	chr20-43681271-43681783
E2F8	E2F2	chr1-23419387-23419806
E2F8	E2F2	chr1-23478617-23479501
E2F8	E2F2	chr1-23482962-23484004
E2F8	E2F2	chr1-23524592-23525646
E2F8	E2F2	chr1-23531221-23532134
E2F8	E2F2	chr1-23539443-23540438
E2F8	E2F2	chr1-23567178-23569859
E2F8	E2F2	chr1-23591231-23592148
E2F8	CEP85	chr1-26164456-26165707
E2F8	CSMD2	chr1-33436445-33437555
E2F8	CSMD2	chr1-33634625-33635213
E2F8	CSMD2	chr1-33654044-33654979
E2F8	CSMD2	chr1-33683619-33684571
E2F8	CSMD2	chr1-33712007-33713647
E2F8	CSMD2	chr1-33717870-33718819
E2F8	CSMD2	chr1-33784563-33785362
E2F8	CSMD2	chr1-33905774-33906830
E2F8	CSMD2	chr1-34020909-34021764
E2F8	CSMD2	chr1-34025511-34026466
E2F8	CSMD2	chr1-34104231-34105284
E2F8	CSMD2	chr1-34149128-34150179
[truncated: 46,125 more rows]

## Sheet: NRPC GRN
tf	target	region
PRDM8	RASSF2	chr20-4685098-4686235
PRDM8	RASSF2	chr20-4693286-4694234
PRDM8	RASSF2	chr20-4703974-4705008
PRDM8	RASSF2	chr20-4716379-4717201
PRDM8	RASSF2	chr20-4719974-4721464
PRDM8	RASSF2	chr20-4730404-4731281
PRDM8	RASSF2	chr20-4757122-4757989
PRDM8	RASSF2	chr20-4758878-4759758
RARB	RASSF2	chr20-4775579-4776619
PRDM8	RASSF2	chr20-4775579-4776619
PRDM8	RASSF2	chr20-4809408-4810356
PRDM8	RASSF2	chr20-4812610-4814824
PRDM8	RASSF2	chr20-4820556-4821491
PRDM8	RASSF2	chr20-4822124-4822328
RARB	RASSF2	chr20-4857891-4858779
PRDM8	RASSF2	chr20-4873159-4873876
PRDM8	RASSF2	chr20-4879953-4880756
RARB	RASSF2	chr20-4893667-4894787
PRDM8	RASSF2	chr20-4893667-4894787
PRDM8	RASSF2	chr20-4895943-4898746
PRDM8	RASSF2	chr20-4900227-4901307
PRDM8	RASSF2	chr20-4912532-4912879
PRDM8	RASSF2	chr20-4916890-4917903
PRDM8	RASSF2	chr20-4918881-4919907
NEUROD1	SLC23A2	chr20-4757122-4757989
PRDM8	SLC23A2	chr20-4757122-4757989
MEF2C	SLC23A2	chr20-4757122-4757989
CREB5	SLC23A2	chr20-4757122-4757989
NFIB	SLC23A2	chr20-4757122-4757989
HMGA2	SLC23A2	chr20-4757122-4757989
NEUROD1	SLC23A2	chr20-4758878-4759758
KLF7	SLC23A2	chr20-4758878-4759758
PRDM8	SLC23A2	chr20-4758878-4759758
RREB1	SLC23A2	chr20-4758878-4759758
PRDM13	SLC23A2	chr20-4758878-4759758
JAZF1	SLC23A2	chr20-4758878-4759758
NFIB	SLC23A2	chr20-4758878-4759758
PTF1A	SLC23A2	chr20-4758878-4759758
ATOH7	SLC23A2	chr20-4758878-4759758
HMGA2	SLC23A2	chr20-4758878-4759758
NR2E3	SLC23A2	chr20-4758878-4759758
NFIX	SLC23A2	chr20-4758878-4759758
ZNF536	SLC23A2	chr20-4758878-4759758
HIF3A	SLC23A2	chr20-4758878-4759758
CRX	SLC23A2	chr20-4758878-4759758
KLF7	SLC23A2	chr20-4760178-4761299
EBF1	SLC23A2	chr20-4760178-4761299
RREB1	SLC23A2	chr20-4760178-4761299
PRDM13	SLC23A2	chr20-4760178-4761299
JAZF1	SLC23A2	chr20-4760178-4761299
GLI3	SLC23A2	chr20-4760178-4761299
NR2E3	SLC23A2	chr20-4760178-4761299
ZNF536	SLC23A2	chr20-4760178-4761299
CRX	SLC23A2	chr20-4760178-4761299
RXRG	SLC23A2	chr20-4775579-4776619
NEUROD1	SLC23A2	chr20-4775579-4776619
KLF7	SLC23A2	chr20-4775579-4776619
HES6	SLC23A2	chr20-4775579-4776619
RARB	SLC23A2	chr20-4775579-4776619
PRDM8	SLC23A2	chr20-4775579-4776619
PRDM13	SLC23A2	chr20-4775579-4776619
JAZF1	SLC23A2	chr20-4775579-4776619
GLI3	SLC23A2	chr20-4775579-4776619
NFIB	SLC23A2	chr20-4775579-4776619
NFIX	SLC23A2	chr20-4775579-4776619
ZNF536	SLC23A2	chr20-4775579-4776619
RXRG	SLC23A2	chr20-4809408-4810356
MITF	SLC23A2	chr20-4809408-4810356
PRDM8	SLC23A2	chr20-4809408-4810356
NR3C2	SLC23A2	chr20-4809408-4810356
EBF1	SLC23A2	chr20-4809408-4810356
RREB1	SLC23A2	chr20-4809408-4810356
PRDM13	SLC23A2	chr20-4809408-4810356
JAZF1	SLC23A2	chr20-4809408-4810356
GLI3	SLC23A2	chr20-4809408-4810356
PTF1A	SLC23A2	chr20-4809408-4810356
NFIX	SLC23A2	chr20-4809408-4810356
ZNF536	SLC23A2	chr20-4809408-4810356
HIF3A	SLC23A2	chr20-4809408-4810356
RXRG	SLC23A2	chr20-4812610-4814824
TCF7L1	SLC23A2	chr20-4812610-4814824
KLF7	SLC23A2	chr20-4812610-4814824
PRDM8	SLC23A2	chr20-4812610-4814824
EBF1	SLC23A2	chr20-4812610-4814824
RREB1	SLC23A2	chr20-4812610-4814824
PRDM13	SLC23A2	chr20-4812610-4814824
JAZF1	SLC23A2	chr20-4812610-4814824
GLI3	SLC23A2	chr20-4812610-4814824
PTF1A	SLC23A2	chr20-4812610-4814824
HMGA2	SLC23A2	chr20-4812610-4814824
NR2E3	SLC23A2	chr20-4812610-4814824
NFIX	SLC23A2	chr20-4812610-4814824
ZNF536	SLC23A2	chr20-4812610-4814824
PRDM8	SLC23A2	chr20-4820556-4821491
PRDM13	SLC23A2	chr20-4820556-4821491
JAZF1	SLC23A2	chr20-4820556-4821491
NFIB	SLC23A2	chr20-4820556-4821491
PTF1A	SLC23A2	chr20-4820556-4821491
NFIX	SLC23A2	chr20-4820556-4821491
HIF3A	SLC23A2	chr20-4820556-4821491
PRDM8	SLC23A2	chr20-4822124-4822328
PTF1A	SLC23A2	chr20-4822124-4822328
NR2E3	SLC23A2	chr20-4822124-4822328
KLF7	SLC23A2	chr20-4822404-4823556
EBF1	SLC23A2	chr20-4822404-4823556
PRDM13	SLC23A2	chr20-4822404-4823556
JAZF1	SLC23A2	chr20-4822404-4823556
NFIB	SLC23A2	chr20-4822404-4823556
HIF3A	SLC23A2	chr20-4822404-4823556
RREB1	SLC23A2	chr20-4823646-4825319
SOX6	SLC23A2	chr20-4823646-4825319
HMGA2	SLC23A2	chr20-4823646-4825319
CRX	SLC23A2	chr20-4823646-4825319
HMGA2	SLC23A2	chr20-4829294-4829639
RREB1	SLC23A2	chr20-4833272-4834011
PRDM13	SLC23A2	chr20-4833272-4834011
CREB5	SLC23A2	chr20-4833272-4834011
GLI3	SLC23A2	chr20-4833272-4834011
HMGA2	SLC23A2	chr20-4833272-4834011
NR2E3	SLC23A2	chr20-4833272-4834011
ZNF536	SLC23A2	chr20-4833272-4834011
HIF3A	SLC23A2	chr20-4833272-4834011
CRX	SLC23A2	chr20-4833272-4834011
RXRG	SLC23A2	chr20-4835491-4836401
KLF7	SLC23A2	chr20-4835491-4836401
PRDM13	SLC23A2	chr20-4835491-4836401
PTF1A	SLC23A2	chr20-4835491-4836401
NR2E3	SLC23A2	chr20-4835491-4836401
RXRG	SLC23A2	chr20-4857891-4858779
NEUROD1	SLC23A2	chr20-4857891-4858779
RARB	SLC23A2	chr20-4857891-4858779
RREB1	SLC23A2	chr20-4857891-4858779
JAZF1	SLC23A2	chr20-4857891-4858779
HMGA2	SLC23A2	chr20-4857891-4858779
NRL	SLC23A2	chr20-4857891-4858779
NR2E3	SLC23A2	chr20-4857891-4858779
NFIX	SLC23A2	chr20-4857891-4858779
PRDM8	SLC23A2	chr20-4873159-4873876
EBF1	SLC23A2	chr20-4873159-4873876
PRDM13	SLC23A2	chr20-4873159-4873876
PTF1A	SLC23A2	chr20-4873159-4873876
OTX2	SLC23A2	chr20-4873159-4873876
NR2E3	SLC23A2	chr20-4873159-4873876
CRX	SLC23A2	chr20-4873159-4873876
GLIS3	SLC23A2	chr20-4874093-4874575
ZNF536	SLC23A2	chr20-4874093-4874575
JAZF1	SLC23A2	chr20-4874697-4874862
PRDM13	SLC23A2	chr20-4875303-4876322
NFIB	SLC23A2	chr20-4875303-4876322
NRL	SLC23A2	chr20-4875303-4876322
NR2E3	SLC23A2	chr20-4875303-4876322
NFIX	SLC23A2	chr20-4875303-4876322
HIF3A	SLC23A2	chr20-4875303-4876322
RXRG	SLC23A2	chr20-4879953-4880756
PROX1	SLC23A2	chr20-4879953-4880756
NEUROD1	SLC23A2	chr20-4879953-4880756
PRDM8	SLC23A2	chr20-4879953-4880756
PRDM13	SLC23A2	chr20-4879953-4880756
PTF1A	SLC23A2	chr20-4879953-4880756
SOX6	SLC23A2	chr20-4879953-4880756
NEUROD1	SLC23A2	chr20-4885272-4885820
ATOH7	SLC23A2	chr20-4885272-4885820
HMGA2	SLC23A2	chr20-4885272-4885820
NR2E3	SLC23A2	chr20-4885272-4885820
HIF3A	SLC23A2	chr20-4885272-4885820
NFIA	SLC23A2	chr20-4885992-4886222
RREB1	SLC23A2	chr20-4885992-4886222
JAZF1	SLC23A2	chr20-4885992-4886222
GLI3	SLC23A2	chr20-4885992-4886222
NFIX	SLC23A2	chr20-4885992-4886222
ZNF536	SLC23A2	chr20-4885992-4886222
LHX4	SLC23A2	chr20-4886858-4887554
TCF7L1	SLC23A2	chr20-4886858-4887554
NEUROD1	SLC23A2	chr20-4886858-4887554
JAZF1	SLC23A2	chr20-4886858-4887554
CREB5	SLC23A2	chr20-4886858-4887554
ZNF536	SLC23A2	chr20-4886858-4887554
MEF2C	SLC23A2	chr20-4889033-4889952
PRDM13	SLC23A2	chr20-4889033-4889952
GLI3	SLC23A2	chr20-4889033-4889952
PTF1A	SLC23A2	chr20-4889033-4889952
ZNF536	SLC23A2	chr20-4889033-4889952
CRX	SLC23A2	chr20-4889033-4889952
RXRG	SLC23A2	chr20-4893667-4894787
TCF7L1	SLC23A2	chr20-4893667-4894787
RARB	SLC23A2	chr20-4893667-4894787
PRDM8	SLC23A2	chr20-4893667-4894787
MEF2C	SLC23A2	chr20-4893667-4894787
PRDM13	SLC23A2	chr20-4893667-4894787
NR2E3	SLC23A2	chr20-4893667-4894787
NEUROD1	SLC23A2	chr20-4895943-4898746
KLF7	SLC23A2	chr20-4895943-4898746
PRDM8	SLC23A2	chr20-4895943-4898746
MEF2C	SLC23A2	chr20-4895943-4898746
EBF1	SLC23A2	chr20-4895943-4898746
RREB1	SLC23A2	chr20-4895943-4898746
PRDM13	SLC23A2	chr20-4895943-4898746
JAZF1	SLC23A2	chr20-4895943-4898746
GLI3	SLC23A2	chr20-4895943-4898746
GLIS3	SLC23A2	chr20-4895943-4898746
PTF1A	SLC23A2	chr20-4895943-4898746
HMGA2	SLC23A2	chr20-4895943-4898746
NRL	SLC23A2	chr20-4895943-4898746
NFIX	SLC23A2	chr20-4895943-4898746
ZNF536	SLC23A2	chr20-4895943-4898746
HIF3A	SLC23A2	chr20-4895943-4898746
CRX	SLC23A2	chr20-4895943-4898746
LHX4	SLC23A2	chr20-4900227-4901307
KLF7	SLC23A2	chr20-4900227-4901307
HES6	SLC23A2	chr20-4900227-4901307
PRDM8	SLC23A2	chr20-4900227-4901307
RREB1	SLC23A2	chr20-4900227-4901307
PRDM13	SLC23A2	chr20-4900227-4901307
PTF1A	SLC23A2	chr20-4900227-4901307
HMGA2	SLC23A2	chr20-4900227-4901307
OTX2	SLC23A2	chr20-4900227-4901307
NR2E3	SLC23A2	chr20-4900227-4901307
RAX2	SLC23A2	chr20-4900227-4901307
PRDM13	SLC23A2	chr20-4906685-4907491
PTF1A	SLC23A2	chr20-4906685-4907491
HMGA2	SLC23A2	chr20-4906685-4907491
ZNF536	SLC23A2	chr20-4906685-4907491
HIF3A	SLC23A2	chr20-4906685-4907491
RXRG	SLC23A2	chr20-4912532-4912879
PRDM8	SLC23A2	chr20-4912532-4912879
EBF1	SLC23A2	chr20-4912532-4912879
PRDM13	SLC23A2	chr20-4912532-4912879
JAZF1	SLC23A2	chr20-4912532-4912879
HMGA2	SLC23A2	chr20-4912532-4912879
NFIA	SLC23A2	chr20-4916890-4917903
PRDM8	SLC23A2	chr20-4916890-4917903
EBF1	SLC23A2	chr20-4916890-4917903
RREB1	SLC23A2	chr20-4916890-4917903
PRDM13	SLC23A2	chr20-4916890-4917903
PTF1A	SLC23A2	chr20-4916890-4917903
HMGA2	SLC23A2	chr20-4916890-4917903
NFIX	SLC23A2	chr20-4916890-4917903
PRDM8	SLC23A2	chr20-4918881-4919907
EBF1	SLC23A2	chr20-4918881-4919907
JAZF1	SLC23A2	chr20-4918881-4919907
CREB5	SLC23A2	chr20-4918881-4919907
CRX	SLC23A2	chr20-4918881-4919907
TCF7L1	SLC23A2	chr20-4923899-4924794
KLF7	SLC23A2	chr20-4923899-4924794
PRDM8	SLC23A2	chr20-4923899-4924794
PRDM13	SLC23A2	chr20-4923899-4924794
JAZF1	SLC23A2	chr20-4923899-4924794
ZNF536	SLC23A2	chr20-4923899-4924794
HIF3A	SLC23A2	chr20-4923899-4924794
TCF7L1	SLC23A2	chr20-4936519-4937383
PRDM8	SLC23A2	chr20-4936519-4937383
NR3C2	SLC23A2	chr20-4936519-4937383
PRDM13	SLC23A2	chr20-4936519-4937383
JAZF1	SLC23A2	chr20-4936519-4937383
GLIS3	SLC23A2	chr20-4936519-4937383
HMGA2	SLC23A2	chr20-4936519-4937383
NFIX	SLC23A2	chr20-4936519-4937383
NFIA	SLC23A2	chr20-4939176-4940098
TCF7L1	SLC23A2	chr20-4939176-4940098
NEUROD1	SLC23A2	chr20-4939176-4940098
PRDM8	SLC23A2	chr20-4939176-4940098
PTF1A	SLC23A2	chr20-4939176-4940098
ATOH7	SLC23A2	chr20-4939176-4940098
OTX2	SLC23A2	chr20-4939176-4940098
NR2E3	SLC23A2	chr20-4939176-4940098
RAX2	SLC23A2	chr20-4939176-4940098
NFIX	SLC23A2	chr20-4939176-4940098
ZNF536	SLC23A2	chr20-4939176-4940098
HIF3A	SLC23A2	chr20-4939176-4940098
CRX	SLC23A2	chr20-4939176-4940098
RXRG	SLC23A2	chr20-4944341-4945253
TCF7L1	SLC23A2	chr20-4944341-4945253
PRDM8	SLC23A2	chr20-4944341-4945253
MEF2C	SLC23A2	chr20-4944341-4945253
ATOH7	SLC23A2	chr20-4944341-4945253
HMGA2	SLC23A2	chr20-4944341-4945253
OTX2	SLC23A2	chr20-4944341-4945253
NR2E3	SLC23A2	chr20-4944341-4945253
HIF3A	SLC23A2	chr20-4944341-4945253
CRX	SLC23A2	chr20-4944341-4945253
PRDM8	SLC23A2	chr20-4949607-4950500
JAZF1	SLC23A2	chr20-4949607-4950500
PTF1A	SLC23A2	chr20-4949607-4950500
HMGA2	SLC23A2	chr20-4949607-4950500
RXRG	SLC23A2	chr20-4955976-4956833
PRDM13	SLC23A2	chr20-4955976-4956833
PTF1A	SLC23A2	chr20-4955976-4956833
HMGA2	SLC23A2	chr20-4955976-4956833
NR2E3	SLC23A2	chr20-4955976-4956833
CRX	SLC23A2	chr20-4955976-4956833
PRDM8	SLC23A2	chr20-4957711-4958578
MEF2C	SLC23A2	chr20-4957711-4958578
PRDM13	SLC23A2	chr20-4957711-4958578
HMGA2	SLC23A2	chr20-4957711-4958578
NRL	SLC23A2	chr20-4957711-4958578
NR2E3	SLC23A2	chr20-4957711-4958578
MEF2C	SLC23A2	chr20-4959419-4960266
BACH2	SLC23A2	chr20-4959419-4960266
HMGA2	SLC23A2	chr20-4959419-4960266
VSX2	SLC23A2	chr20-4959419-4960266
NR2E3	SLC23A2	chr20-4959419-4960266
VSX1	SLC23A2	chr20-4959419-4960266
RXRG	SLC23A2	chr20-4964052-4964938
TCF7L1	SLC23A2	chr20-4964052-4964938
PRDM8	SLC23A2	chr20-4964052-4964938
MEF2C	SLC23A2	chr20-4964052-4964938
BACH2	SLC23A2	chr20-4964052-4964938
HMGA2	SLC23A2	chr20-4964052-4964938
OTX2	SLC23A2	chr20-4964052-4964938
HIF3A	SLC23A2	chr20-4964052-4964938
CRX	SLC23A2	chr20-4964052-4964938
RXRG	SLC23A2	chr20-4966468-4967390
TCF7L1	SLC23A2	chr20-4966468-4967390
MEF2C	SLC23A2	chr20-4966468-4967390
RREB1	SLC23A2	chr20-4966468-4967390
JAZF1	SLC23A2	chr20-4966468-4967390
PTF1A	SLC23A2	chr20-4966468-4967390
OTX2	SLC23A2	chr20-4966468-4967390
NR2E3	SLC23A2	chr20-4966468-4967390
ONECUT2	SLC23A2	chr20-4966468-4967390
HIF3A	SLC23A2	chr20-4966468-4967390
CRX	SLC23A2	chr20-4966468-4967390
LHX4	SLC23A2	chr20-4973337-4974201
PROX1	SLC23A2	chr20-4973337-4974201
TCF7L1	SLC23A2	chr20-4973337-4974201
NEUROD1	SLC23A2	chr20-4973337-4974201
MITF	SLC23A2	chr20-4973337-4974201
PRDM8	SLC23A2	chr20-4973337-4974201
PRDM13	SLC23A2	chr20-4973337-4974201
HMGA2	SLC23A2	chr20-4973337-4974201
NR2E3	SLC23A2	chr20-4973337-4974201
RAX2	SLC23A2	chr20-4973337-4974201
ZNF536	SLC23A2	chr20-4973337-4974201
LHX4	SLC23A2	chr20-4978047-4979071
HES6	SLC23A2	chr20-4978047-4979071
NR3C2	SLC23A2	chr20-4978047-4979071
PRDM13	SLC23A2	chr20-4978047-4979071
NFIB	SLC23A2	chr20-4978047-4979071
HMGA2	SLC23A2	chr20-4978047-4979071
CRX	SLC23A2	chr20-4978047-4979071
TCF7L1	SLC23A2	chr20-4980818-4981713
MEF2C	SLC23A2	chr20-4980818-4981713
PRDM13	SLC23A2	chr20-4980818-4981713
ZNF536	SLC23A2	chr20-4980818-4981713
NEUROD1	SLC23A2	chr20-4985378-4986299
ATOH7	SLC23A2	chr20-4985378-4986299
HMGA2	SLC23A2	chr20-4985378-4986299
HIF3A	SLC23A2	chr20-4985378-4986299
CRX	SLC23A2	chr20-4985378-4986299
PRDM8	SLC23A2	chr20-4989233-4990004
PRDM13	SLC23A2	chr20-4989233-4990004
HMGA2	SLC23A2	chr20-4989233-4990004
OTX2	SLC23A2	chr20-4989233-4990004
CRX	SLC23A2	chr20-4989233-4990004
KLF7	SLC23A2	chr20-4999842-5001405
MITF	SLC23A2	chr20-4999842-5001405
PRDM8	SLC23A2	chr20-4999842-5001405
EBF1	SLC23A2	chr20-4999842-5001405
RREB1	SLC23A2	chr20-4999842-5001405
PRDM13	SLC23A2	chr20-4999842-5001405
JAZF1	SLC23A2	chr20-4999842-5001405
GLI3	SLC23A2	chr20-4999842-5001405
PTF1A	SLC23A2	chr20-4999842-5001405
HMGA2	SLC23A2	chr20-4999842-5001405
ONECUT2	SLC23A2	chr20-4999842-5001405
ZNF536	SLC23A2	chr20-4999842-5001405
HIF3A	SLC23A2	chr20-4999842-5001405
NEUROD1	SLC23A2	chr20-5001500-5002450
VSX2	SLC23A2	chr20-5001500-5002450
VSX1	SLC23A2	chr20-5001500-5002450
NEUROD1	SLC23A2	chr20-5024579-5025437
MEF2C	SLC23A2	chr20-5024579-5025437
ATOH7	SLC23A2	chr20-5024579-5025437
HMGA2	SLC23A2	chr20-5024579-5025437
NR2E3	SLC23A2	chr20-5024579-5025437
HIF3A	SLC23A2	chr20-5024579-5025437
CRX	SLC23A2	chr20-5024579-5025437
KLF7	SLC23A2	chr20-5028185-5029169
PRDM8	SLC23A2	chr20-5028185-5029169
PTF1A	SLC23A2	chr20-5028185-5029169
SOX6	SLC23A2	chr20-5028185-5029169
HMGA2	SLC23A2	chr20-5028185-5029169
NRL	SLC23A2	chr20-5028185-5029169
NR2E3	SLC23A2	chr20-5028185-5029169
ONECUT2	SLC23A2	chr20-5028185-5029169
CRX	SLC23A2	chr20-5028185-5029169
PRDM8	SLC23A2	chr20-5048000-5048900
NR3C2	SLC23A2	chr20-5048000-5048900
MEF2C	SLC23A2	chr20-5048000-5048900
RREB1	SLC23A2	chr20-5048000-5048900
JAZF1	SLC23A2	chr20-5048000-5048900
HMGA2	SLC23A2	chr20-5048000-5048900
NR2E3	SLC23A2	chr20-5048000-5048900
CRX	SLC23A2	chr20-5048000-5048900
KLF7	SLC23A2	chr20-5050322-5051107
HES6	SLC23A2	chr20-5050322-5051107
PRDM8	SLC23A2	chr20-5050322-5051107
MEF2C	SLC23A2	chr20-5050322-5051107
JAZF1	SLC23A2	chr20-5050322-5051107
HMGA2	SLC23A2	chr20-5050322-5051107
NR2E3	SLC23A2	chr20-5050322-5051107
ONECUT2	SLC23A2	chr20-5050322-5051107
LHX4	SLC23A2	chr20-5055826-5056759
NEUROD1	SLC23A2	chr20-5055826-5056759
HES6	SLC23A2	chr20-5055826-5056759
MEF2C	SLC23A2	chr20-5055826-5056759
RREB1	SLC23A2	chr20-5055826-5056759
PRDM13	SLC23A2	chr20-5055826-5056759
JAZF1	SLC23A2	chr20-5055826-5056759
HMGA2	SLC23A2	chr20-5055826-5056759
NR2E3	SLC23A2	chr20-5055826-5056759
HIF3A	SLC23A2	chr20-5055826-5056759
CRX	SLC23A2	chr20-5055826-5056759
NFIA	SLC23A2	chr20-5060915-5061036
ONECUT2	SLC23A2	chr20-5060915-5061036
RREB1	SLC23A2	chr20-5061341-5061834
JAZF1	SLC23A2	chr20-5061341-5061834
NRL	SLC23A2	chr20-5061341-5061834
ZNF536	SLC23A2	chr20-5061341-5061834
RXRG	SLC23A2	chr20-5095739-5096818
TCF7L1	SLC23A2	chr20-5095739-5096818
NEUROD1	SLC23A2	chr20-5095739-5096818
RARB	SLC23A2	chr20-5095739-5096818
PRDM8	SLC23A2	chr20-5095739-5096818
NR3C2	SLC23A2	chr20-5095739-5096818
PRDM13	SLC23A2	chr20-5095739-5096818
NFIB	SLC23A2	chr20-5095739-5096818
PTF1A	SLC23A2	chr20-5095739-5096818
ATOH7	SLC23A2	chr20-5095739-5096818
HMGA2	SLC23A2	chr20-5095739-5096818
OTX2	SLC23A2	chr20-5095739-5096818
HIF3A	SLC23A2	chr20-5095739-5096818
CRX	SLC23A2	chr20-5095739-5096818
MEF2C	SLC23A2	chr20-5100932-5101401
JAZF1	SLC23A2	chr20-5100932-5101401
HMGA2	SLC23A2	chr20-5100932-5101401
OTX2	SLC23A2	chr20-5100932-5101401
NR2E3	SLC23A2	chr20-5100932-5101401
CRX	SLC23A2	chr20-5100932-5101401
NR2E1	PCNA	chr20-5024579-5025437
HMGB2	PCNA	chr20-5028185-5029169
NR2E1	PCNA	chr20-5028185-5029169
CUX2	PCNA	chr20-5028185-5029169
NRL	PCNA	chr20-5028185-5029169
HMGB2	PCNA	chr20-5048000-5048900
NR2E1	PCNA	chr20-5050322-5051107
NR2E1	PCNA	chr20-5055826-5056759
CUX2	PCNA	chr20-5060915-5061036
NRL	PCNA	chr20-5061341-5061834
HMGB2	PCNA	chr20-5112277-5112719
ETV5	PCNA	chr20-5113104-5113765
E2F8	PCNA	chr20-5113104-5113765
GLI2	PCNA	chr20-5118867-5119577
NR2E1	PCNA	chr20-5118867-5119577
E2F8	PCNA	chr20-5118867-5119577
HMGB2	PCNA	chr20-5120027-5120688
SOX2	PCNA	chr20-5125836-5126499
HMGB2	PCNA	chr20-5125836-5126499
NR2E1	PCNA	chr20-5125836-5126499
MYB	PCNA	chr20-5148183-5149073
MYB	PCNA	chr20-5150234-5151234
HMGB2	PCNA	chr20-5164532-5165420
ETV5	PCNA	chr20-5166408-5167742
NR2E1	PCNA	chr20-5166408-5167742
MYB	PCNA	chr20-5168730-5169641
NR2E1	PCNA	chr20-5170982-5172111
FOXN4	PCNA	chr20-5170982-5172111
NR2E1	PCNA	chr20-5202105-5203125
HMGB2	PCNA	chr20-5205119-5207097
MYB	PCNA	chr20-5205119-5207097
ST18	PCNA	chr20-5205119-5207097
NR2E1	PCNA	chr20-5216331-5217390
HMGB2	PCNA	chr20-5220666-5221669
SOX2	PCNA	chr20-5222767-5224597
HMGB2	PCNA	chr20-5222767-5224597
NR2E1	PCNA	chr20-5222767-5224597
E2F8	PCNA	chr20-5222767-5224597
RREB1	CHGB	chr20-5817069-5818048
ST18	CHGB	chr20-5817069-5818048
ZNF83	CHGB	chr20-5817069-5818048
NFIB	CHGB	chr20-5824929-5825859
SOX6	CHGB	chr20-5824929-5825859
RXRG	CHGB	chr20-5826876-5827775
THRB	CHGB	chr20-5826876-5827775
RREB1	CHGB	chr20-5826876-5827775
PRDM1	CHGB	chr20-5826876-5827775
NFIB	CHGB	chr20-5826876-5827775
ZNF83	CHGB	chr20-5826876-5827775
LHX4	CHGB	chr20-5828953-5829900
NEUROD1	CHGB	chr20-5828953-5829900
NEUROD4	CHGB	chr20-5828953-5829900
MEIS2	CHGB	chr20-5828953-5829900
CRX	CHGB	chr20-5828953-5829900
RXRG	CHGB	chr20-5864284-5865065
PRDM1	CHGB	chr20-5864284-5865065
OTX2	CHGB	chr20-5864284-5865065
CRX	CHGB	chr20-5864284-5865065
LHX4	CHGB	chr20-5870063-5871251
NEUROD1	CHGB	chr20-5870063-5871251
THRB	CHGB	chr20-5870063-5871251
PRDM1	CHGB	chr20-5870063-5871251
NEUROD4	CHGB	chr20-5870063-5871251
CRX	CHGB	chr20-5870063-5871251
PRDM1	CHGB	chr20-5871692-5872696
PRDM1	CHGB	chr20-5883463-5884331
CRX	CHGB	chr20-5883463-5884331
RREB1	CHGB	chr20-5886328-5887210
ST18	CHGB	chr20-5886328-5887210
OTX2	CHGB	chr20-5886328-5887210
CRX	CHGB	chr20-5886328-5887210
THRB	CHGB	chr20-5910764-5911429
RREB1	CHGB	chr20-5910764-5911429
ST18	CHGB	chr20-5910764-5911429
GLI3	MCM8	chr20-5864284-5865065
GLI3	MCM8	chr20-5871692-5872696
ST18	MCM8	chr20-5886328-5887210
GLI3	MCM8	chr20-5910764-5911429
ST18	MCM8	chr20-5910764-5911429
SOX6	BMP2	chr20-6681280-6682141
HMGA2	BMP2	chr20-6681280-6682141
HMGA2	BMP2	chr20-6715701-6716487
PRDM8	BMP2	chr20-6736137-6736948
PRDM8	BMP2	chr20-6765076-6766050
HMGA2	BMP2	chr20-6765076-6766050
NFIC	BMP2	chr20-6765076-6766050
PRDM8	BMP2	chr20-6767051-6767663
HMGA2	BMP2	chr20-6767051-6767663
NFIC	BMP2	chr20-6768876-6770119
NFIX	BMP2	chr20-6768876-6770119
NFIB	BMP2	chr20-6770473-6770777
HIVEP3	PLCB1	chr20-7976793-7977347
TCF7L1	PLCB1	chr20-7976793-7977347
SOX2	PLCB1	chr20-7976793-7977347
SOX6	PLCB1	chr20-7976793-7977347
NR4A1	PLCB1	chr20-7976793-7977347
NEUROD4	PLCB1	chr20-7976793-7977347
NR2E3	PLCB1	chr20-7976793-7977347
CRX	PLCB1	chr20-7976793-7977347
TCF7L1	PLCB1	chr20-7982622-7983276
SOX2	PLCB1	chr20-7982622-7983276
MEF2C	PLCB1	chr20-7982622-7983276
SOX6	PLCB1	chr20-7982622-7983276
HMGA2	PLCB1	chr20-7982622-7983276
THRB	PLCB1	chr20-7985645-7986573
ZBTB38	PLCB1	chr20-7985645-7986573
PRDM8	PLCB1	chr20-7985645-7986573
MEF2C	PLCB1	chr20-7985645-7986573
NR2E1	PLCB1	chr20-7985645-7986573
JAZF1	PLCB1	chr20-7985645-7986573
POU6F2	PLCB1	chr20-7985645-7986573
NEUROD4	PLCB1	chr20-7985645-7986573
HMGA2	PLCB1	chr20-7985645-7986573
FOS	PLCB1	chr20-7985645-7986573
NR2E3	PLCB1	chr20-7985645-7986573
RAX2	PLCB1	chr20-7985645-7986573
TSHZ2	PLCB1	chr20-7985645-7986573
FOS	PLCB1	chr20-7995841-7996025
PRDM8	PLCB1	chr20-7996072-7996828
PRDM13	PLCB1	chr20-7996072-7996828
PTF1A	PLCB1	chr20-7996072-7996828
NR2E1	PLCB1	chr20-7999079-7999731
PTF1A	PLCB1	chr20-7999079-7999731
FOS	PLCB1	chr20-7999079-7999731
ONECUT1	PLCB1	chr20-7999079-7999731
NR2E3	PLCB1	chr20-7999079-7999731
MEF2C	PLCB1	chr20-7999861-7999941
HMGA2	PLCB1	chr20-7999861-7999941
THRB	PLCB1	chr20-8004819-8005757
PRDM8	PLCB1	chr20-8004819-8005757
PRDM13	PLCB1	chr20-8004819-8005757
NR2E1	PLCB1	chr20-8004819-8005757
POU6F2	PLCB1	chr20-8004819-8005757
PTF1A	PLCB1	chr20-8004819-8005757
NR2E3	PLCB1	chr20-8004819-8005757
HIF3A	PLCB1	chr20-8004819-8005757
PPARA	PLCB1	chr20-8004819-8005757
MITF	PLCB1	chr20-8012440-8013369
ZBTB38	PLCB1	chr20-8012440-8013369
SOX2	PLCB1	chr20-8012440-8013369
ISL1	PLCB1	chr20-8012440-8013369
PRDM13	PLCB1	chr20-8012440-8013369
PTF1A	PLCB1	chr20-8012440-8013369
NEUROD4	PLCB1	chr20-8012440-8013369
HMGA2	PLCB1	chr20-8012440-8013369
CRX	PLCB1	chr20-8012440-8013369
HIVEP3	PLCB1	chr20-8018107-8018792
THRB	PLCB1	chr20-8018107-8018792
PRDM8	PLCB1	chr20-8018107-8018792
EGR1	PLCB1	chr20-8018107-8018792
PRDM13	PLCB1	chr20-8018107-8018792
JAZF1	PLCB1	chr20-8018107-8018792
SOX6	PLCB1	chr20-8018107-8018792
SMAD6	PLCB1	chr20-8018107-8018792
HES1	PLCB1	chr20-8019830-8020810
MEF2C	PLCB1	chr20-8019830-8020810
PTF1A	PLCB1	chr20-8019830-8020810
EBF3	PLCB1	chr20-8019830-8020810
FOS	PLCB1	chr20-8019830-8020810
ONECUT1	PLCB1	chr20-8019830-8020810
NR2E3	PLCB1	chr20-8019830-8020810
ZBTB7C	PLCB1	chr20-8019830-8020810
RAX2	PLCB1	chr20-8019830-8020810
TSHZ2	PLCB1	chr20-8019830-8020810
THRB	PLCB1	chr20-8027167-8028108
ZBTB38	PLCB1	chr20-8027167-8028108
SOX2	PLCB1	chr20-8027167-8028108
ISL1	PLCB1	chr20-8027167-8028108
MEF2C	PLCB1	chr20-8027167-8028108
EGR1	PLCB1	chr20-8027167-8028108
BACH2	PLCB1	chr20-8027167-8028108
POU6F2	PLCB1	chr20-8027167-8028108
GLI3	PLCB1	chr20-8027167-8028108
SOX6	PLCB1	chr20-8027167-8028108
HMGA2	PLCB1	chr20-8027167-8028108
VSX2	PLCB1	chr20-8027167-8028108
NR2E3	PLCB1	chr20-8027167-8028108
ZNF536	PLCB1	chr20-8027167-8028108
VSX1	PLCB1	chr20-8027167-8028108
HIVEP3	PLCB1	chr20-8037983-8039061
NFIA	PLCB1	chr20-8037983-8039061
THRB	PLCB1	chr20-8037983-8039061
ZBTB38	PLCB1	chr20-8037983-8039061
PRDM8	PLCB1	chr20-8037983-8039061
NR3C2	PLCB1	chr20-8037983-8039061
PRDM13	PLCB1	chr20-8037983-8039061
NR2E1	PLCB1	chr20-8037983-8039061
CREB5	PLCB1	chr20-8037983-8039061
NEUROD4	PLCB1	chr20-8037983-8039061
HMGA2	PLCB1	chr20-8037983-8039061
NRL	PLCB1	chr20-8037983-8039061
ONECUT1	PLCB1	chr20-8037983-8039061
SMAD6	PLCB1	chr20-8037983-8039061
NR2E3	PLCB1	chr20-8037983-8039061
RAX2	PLCB1	chr20-8037983-8039061
CRX	PLCB1	chr20-8037983-8039061
TCF7L1	PLCB1	chr20-8043508-8044435
PRDM8	PLCB1	chr20-8043508-8044435
MEF2C	PLCB1	chr20-8043508-8044435
BACH2	PLCB1	chr20-8043508-8044435
PRDM13	PLCB1	chr20-8043508-8044435
HMGA2	PLCB1	chr20-8043508-8044435
FOS	PLCB1	chr20-8043508-8044435
NR2E3	PLCB1	chr20-8043508-8044435
HIF3A	PLCB1	chr20-8043508-8044435
TSHZ2	PLCB1	chr20-8043508-8044435
NFIA	PLCB1	chr20-8054772-8055720
ZBTB38	PLCB1	chr20-8054772-8055720
NR2E1	PLCB1	chr20-8054772-8055720
JAZF1	PLCB1	chr20-8054772-8055720
PTF1A	PLCB1	chr20-8054772-8055720
NEUROD4	PLCB1	chr20-8054772-8055720
NR2E3	PLCB1	chr20-8054772-8055720
CRX	PLCB1	chr20-8054772-8055720
PPARA	PLCB1	chr20-8054772-8055720
SOX2	PLCB1	chr20-8065170-8066028
ETV5	PLCB1	chr20-8065170-8066028
PRDM8	PLCB1	chr20-8065170-8066028
ATOH7	PLCB1	chr20-8065170-8066028
HMGA2	PLCB1	chr20-8065170-8066028
NRL	PLCB1	chr20-8065170-8066028
ONECUT1	PLCB1	chr20-8065170-8066028
ONECUT2	PLCB1	chr20-8065170-8066028
HIF3A	PLCB1	chr20-8065170-8066028
CRX	PLCB1	chr20-8065170-8066028
PRDM8	PLCB1	chr20-8082769-8083678
MEF2C	PLCB1	chr20-8082769-8083678
PRDM13	PLCB1	chr20-8082769-8083678
PTF1A	PLCB1	chr20-8082769-8083678
EBF3	PLCB1	chr20-8082769-8083678
NR4A1	PLCB1	chr20-8082769-8083678
HMGA2	PLCB1	chr20-8082769-8083678
NR2E3	PLCB1	chr20-8082769-8083678
CRX	PLCB1	chr20-8082769-8083678
THRB	PLCB1	chr20-8092732-8093599
RARB	PLCB1	chr20-8092732-8093599
MEF2C	PLCB1	chr20-8092732-8093599
POU6F2	PLCB1	chr20-8092732-8093599
SOX6	PLCB1	chr20-8092732-8093599
NR4A1	PLCB1	chr20-8092732-8093599
SMAD6	PLCB1	chr20-8092732-8093599
NR2E3	PLCB1	chr20-8092732-8093599
RAX2	PLCB1	chr20-8092732-8093599
MYT1L	PLCB1	chr20-8115957-8117494
RARB	PLCB1	chr20-8115957-8117494
PRDM8	PLCB1	chr20-8115957-8117494
NR2E1	PLCB1	chr20-8115957-8117494
ST18	PLCB1	chr20-8115957-8117494
NFIB	PLCB1	chr20-8115957-8117494
ATOH7	PLCB1	chr20-8115957-8117494
NEUROD4	PLCB1	chr20-8115957-8117494
FOS	PLCB1	chr20-8115957-8117494
SMAD6	PLCB1	chr20-8115957-8117494
NR2E3	PLCB1	chr20-8115957-8117494
NFIC	PLCB1	chr20-8115957-8117494
HIF3A	PLCB1	chr20-8115957-8117494
PPARA	PLCB1	chr20-8115957-8117494
HIVEP3	PLCB1	chr20-8131552-8132137
PRDM8	PLCB1	chr20-8131552-8132137
THRB	PLCB1	chr20-8132751-8133305
PRDM13	PLCB1	chr20-8132751-8133305
JAZF1	PLCB1	chr20-8132751-8133305
TCF7L1	PLCB1	chr20-8144461-8145365
THRB	PLCB1	chr20-8144461-8145365
ZBTB38	PLCB1	chr20-8144461-8145365
ETV5	PLCB1	chr20-8144461-8145365
PTF1A	PLCB1	chr20-8144461-8145365
HMGA2	PLCB1	chr20-8144461-8145365
ONECUT2	PLCB1	chr20-8144461-8145365
ZNF536	PLCB1	chr20-8144461-8145365
CRX	PLCB1	chr20-8144461-8145365
TSHZ2	PLCB1	chr20-8144461-8145365
HIVEP3	PLCB1	chr20-8151356-8152265
MYT1L	PLCB1	chr20-8151356-8152265
SOX2	PLCB1	chr20-8151356-8152265
MEF2C	PLCB1	chr20-8151356-8152265
NR2E1	PLCB1	chr20-8151356-8152265
JAZF1	PLCB1	chr20-8151356-8152265
ST18	PLCB1	chr20-8151356-8152265
SOX6	PLCB1	chr20-8151356-8152265
HMGA2	PLCB1	chr20-8151356-8152265
NR2E3	PLCB1	chr20-8151356-8152265
PRDM13	PLCB1	chr20-8204288-8204371
ZBTB38	PLCB1	chr20-8209395-8210322
SOX2	PLCB1	chr20-8209395-8210322
ISL1	PLCB1	chr20-8209395-8210322
MEF2C	PLCB1	chr20-8209395-8210322
JAZF1	PLCB1	chr20-8209395-8210322
HMGA2	PLCB1	chr20-8209395-8210322
ONECUT1	PLCB1	chr20-8209395-8210322
NR2E3	PLCB1	chr20-8209395-8210322
ZBTB38	PLCB1	chr20-8210827-8211510
JAZF1	PLCB1	chr20-8210827-8211510
THRB	PLCB1	chr20-8213799-8214695
PRDM8	PLCB1	chr20-8213799-8214695
BACH2	PLCB1	chr20-8213799-8214695
PRDM13	PLCB1	chr20-8213799-8214695
NR2E1	PLCB1	chr20-8213799-8214695
NRL	PLCB1	chr20-8213799-8214695
NR2E3	PLCB1	chr20-8213799-8214695
NFIC	PLCB1	chr20-8213799-8214695
RAX2	PLCB1	chr20-8213799-8214695
NFIA	PLCB1	chr20-8297514-8298352
ZBTB38	PLCB1	chr20-8297514-8298352
MEF2C	PLCB1	chr20-8297514-8298352
BACH2	PLCB1	chr20-8297514-8298352
PRDM13	PLCB1	chr20-8297514-8298352
NR2E1	PLCB1	chr20-8297514-8298352
GLI3	PLCB1	chr20-8297514-8298352
HMGA2	PLCB1	chr20-8297514-8298352
ONECUT1	PLCB1	chr20-8297514-8298352
ZBTB7C	PLCB1	chr20-8297514-8298352
NFIC	PLCB1	chr20-8297514-8298352
ZNF536	PLCB1	chr20-8297514-8298352
HIVEP3	PLCB1	chr20-8304030-8305117
THRB	PLCB1	chr20-8304030-8305117
ZBTB38	PLCB1	chr20-8304030-8305117
SOX2	PLCB1	chr20-8304030-8305117
PRDM8	PLCB1	chr20-8304030-8305117
ISL1	PLCB1	chr20-8304030-8305117
EGR1	PLCB1	chr20-8304030-8305117
JAZF1	PLCB1	chr20-8304030-8305117
GLIS3	PLCB1	chr20-8304030-8305117
PTF1A	PLCB1	chr20-8304030-8305117
NR4A1	PLCB1	chr20-8304030-8305117
NRL	PLCB1	chr20-8304030-8305117
CRX	PLCB1	chr20-8304030-8305117
ETV5	PLCB1	chr20-8305374-8305673
NFIX	PLCB1	chr20-8305374-8305673
HIF3A	PLCB1	chr20-8305374-8305673
TSHZ2	PLCB1	chr20-8305374-8305673
TCF7L1	PLCB1	chr20-8305934-8306365
GLI3	PLCB1	chr20-8305934-8306365
PTF1A	PLCB1	chr20-8305934-8306365
NEUROD4	PLCB1	chr20-8305934-8306365
ZNF536	PLCB1	chr20-8305934-8306365
CRX	PLCB1	chr20-8305934-8306365
HIVEP3	PLCB1	chr20-8306748-8307749
EPAS1	PLCB1	chr20-8306748-8307749
ZBTB38	PLCB1	chr20-8306748-8307749
SOX2	PLCB1	chr20-8306748-8307749
HES1	PLCB1	chr20-8306748-8307749
MEF2C	PLCB1	chr20-8306748-8307749
EGR1	PLCB1	chr20-8306748-8307749
PRDM13	PLCB1	chr20-8306748-8307749
NR2E1	PLCB1	chr20-8306748-8307749
POU6F2	PLCB1	chr20-8306748-8307749
GLIS3	PLCB1	chr20-8306748-8307749
PTF1A	PLCB1	chr20-8306748-8307749
ONECUT1	PLCB1	chr20-8306748-8307749
SMAD6	PLCB1	chr20-8306748-8307749
RAX2	PLCB1	chr20-8306748-8307749
HIF3A	PLCB1	chr20-8306748-8307749
CRX	PLCB1	chr20-8306748-8307749
HIVEP3	PLCB1	chr20-8309246-8310162
MEF2C	PLCB1	chr20-8309246-8310162
HMGA2	PLCB1	chr20-8309246-8310162
NR2E3	PLCB1	chr20-8309246-8310162
RAX2	PLCB1	chr20-8309246-8310162
ZNF536	PLCB1	chr20-8309246-8310162
CRX	PLCB1	chr20-8309246-8310162
TSHZ2	PLCB1	chr20-8309246-8310162
PRDM13	PLCB1	chr20-8330976-8331879
NR2E1	PLCB1	chr20-8330976-8331879
JAZF1	PLCB1	chr20-8330976-8331879
NR4A1	PLCB1	chr20-8330976-8331879
HMGA2	PLCB1	chr20-8330976-8331879
NR2E3	PLCB1	chr20-8330976-8331879
NFIC	PLCB1	chr20-8330976-8331879
PROX1	PLCB1	chr20-8360840-8361895
TCF7L1	PLCB1	chr20-8360840-8361895
SOX2	PLCB1	chr20-8360840-8361895
NR4A1	PLCB1	chr20-8360840-8361895
VSX2	PLCB1	chr20-8360840-8361895
VSX1	PLCB1	chr20-8360840-8361895
PPARA	PLCB1	chr20-8360840-8361895
ZBTB38	PLCB1	chr20-8372881-8373163
HIF3A	PLCB1	chr20-8372881-8373163
HIVEP3	PLCB1	chr20-8385010-8385971
PRDM8	PLCB1	chr20-8385010-8385971
BACH2	PLCB1	chr20-8385010-8385971
PRDM13	PLCB1	chr20-8385010-8385971
PTF1A	PLCB1	chr20-8385010-8385971
EBF3	PLCB1	chr20-8385010-8385971
HMGA2	PLCB1	chr20-8385010-8385971
FOS	PLCB1	chr20-8385010-8385971
SMAD6	PLCB1	chr20-8385010-8385971
NFIC	PLCB1	chr20-8385010-8385971
ZNF536	PLCB1	chr20-8385010-8385971
TSHZ2	PLCB1	chr20-8385010-8385971
PRDM8	PLCB1	chr20-8389134-8390147
BACH2	PLCB1	chr20-8389134-8390147
JAZF1	PLCB1	chr20-8389134-8390147
PTF1A	PLCB1	chr20-8389134-8390147
ATOH7	PLCB1	chr20-8389134-8390147
EBF3	PLCB1	chr20-8389134-8390147
NR4A1	PLCB1	chr20-8389134-8390147
FOS	PLCB1	chr20-8389134-8390147
HIF3A	PLCB1	chr20-8389134-8390147
PPARA	PLCB1	chr20-8389134-8390147
PRDM8	PLCB1	chr20-8404930-8405856
NR2E1	PLCB1	chr20-8404930-8405856
PTF1A	PLCB1	chr20-8404930-8405856
SOX6	PLCB1	chr20-8404930-8405856
PROX1	PLCB1	chr20-8414587-8415505
MYT1L	PLCB1	chr20-8414587-8415505
TCF7L1	PLCB1	chr20-8414587-8415505
THRB	PLCB1	chr20-8414587-8415505
PRDM8	PLCB1	chr20-8414587-8415505
ISL1	PLCB1	chr20-8414587-8415505
BACH2	PLCB1	chr20-8414587-8415505
NR2E1	PLCB1	chr20-8414587-8415505
POU6F2	PLCB1	chr20-8414587-8415505
ST18	PLCB1	chr20-8414587-8415505
NFIB	PLCB1	chr20-8414587-8415505
PTF1A	PLCB1	chr20-8414587-8415505
SOX6	PLCB1	chr20-8414587-8415505
HMGA2	PLCB1	chr20-8414587-8415505
FOS	PLCB1	chr20-8414587-8415505
NFIC	PLCB1	chr20-8414587-8415505
RAX2	PLCB1	chr20-8414587-8415505
NFIX	PLCB1	chr20-8414587-8415505
CRX	PLCB1	chr20-8414587-8415505
TSHZ2	PLCB1	chr20-8414587-8415505
TCF7L1	PLCB1	chr20-8432510-8433297
ZBTB38	PLCB1	chr20-8432510-8433297
PTF1A	PLCB1	chr20-8432510-8433297
HMGA2	PLCB1	chr20-8432510-8433297
VSX2	PLCB1	chr20-8432510-8433297
NR2E3	PLCB1	chr20-8432510-8433297
VSX1	PLCB1	chr20-8432510-8433297
PRDM8	PLCB1	chr20-8469860-8470726
NR3C2	PLCB1	chr20-8469860-8470726
PRDM13	PLCB1	chr20-8469860-8470726
JAZF1	PLCB1	chr20-8469860-8470726
ATOH7	PLCB1	chr20-8469860-8470726
NR4A1	PLCB1	chr20-8469860-8470726
HMGA2	PLCB1	chr20-8469860-8470726
NR2E3	PLCB1	chr20-8469860-8470726
HIF3A	PLCB1	chr20-8469860-8470726
CRX	PLCB1	chr20-8469860-8470726
PROX1	PLCB1	chr20-8473244-8474235
TCF7L1	PLCB1	chr20-8473244-8474235
HES6	PLCB1	chr20-8473244-8474235
THRB	PLCB1	chr20-8473244-8474235
ZBTB38	PLCB1	chr20-8473244-8474235
MEF2C	PLCB1	chr20-8473244-8474235
BACH2	PLCB1	chr20-8473244-8474235
CREB5	PLCB1	chr20-8473244-8474235
FOS	PLCB1	chr20-8473244-8474235
ONECUT1	PLCB1	chr20-8473244-8474235
SMAD6	PLCB1	chr20-8473244-8474235
NR2E3	PLCB1	chr20-8473244-8474235
ONECUT2	PLCB1	chr20-8473244-8474235
NFIA	PLCB1	chr20-8475623-8476677
ZBTB38	PLCB1	chr20-8475623-8476677
ISL1	PLCB1	chr20-8475623-8476677
JAZF1	PLCB1	chr20-8475623-8476677
POU6F2	PLCB1	chr20-8475623-8476677
PTF1A	PLCB1	chr20-8475623-8476677
SOX6	PLCB1	chr20-8475623-8476677
HMGA2	PLCB1	chr20-8475623-8476677
NFIC	PLCB1	chr20-8475623-8476677
NFIX	PLCB1	chr20-8475623-8476677
ATOH7	PLCB1	chr20-8485195-8486163
FOS	PLCB1	chr20-8485195-8486163
SMAD6	PLCB1	chr20-8485195-8486163
ONECUT2	PLCB1	chr20-8485195-8486163
HIF3A	PLCB1	chr20-8485195-8486163
PRDM8	PLCB1	chr20-8518699-8519656
PRDM13	PLCB1	chr20-8518699-8519656
HMGA2	PLCB1	chr20-8518699-8519656
SMAD6	PLCB1	chr20-8518699-8519656
NR2E3	PLCB1	chr20-8518699-8519656
HIVEP3	PLCB1	chr20-8523322-8524238
JAZF1	PLCB1	chr20-8523322-8524238
POU6F2	PLCB1	chr20-8523322-8524238
PTF1A	PLCB1	chr20-8523322-8524238
HMGA2	PLCB1	chr20-8523322-8524238
ONECUT1	PLCB1	chr20-8523322-8524238
SMAD6	PLCB1	chr20-8523322-8524238
NR2E3	PLCB1	chr20-8523322-8524238
RAX2	PLCB1	chr20-8523322-8524238
HIVEP3	PLCB1	chr20-8524300-8525168
THRB	PLCB1	chr20-8524300-8525168
ZBTB38	PLCB1	chr20-8524300-8525168
PRDM8	PLCB1	chr20-8524300-8525168
MEF2C	PLCB1	chr20-8524300-8525168
PRDM13	PLCB1	chr20-8524300-8525168
PTF1A	PLCB1	chr20-8524300-8525168
SOX6	PLCB1	chr20-8524300-8525168
NR4A1	PLCB1	chr20-8524300-8525168
HMGA2	PLCB1	chr20-8524300-8525168
NRL	PLCB1	chr20-8524300-8525168
HIF3A	PLCB1	chr20-8524300-8525168
TCF7L1	PLCB1	chr20-8526238-8527274
ZBTB38	PLCB1	chr20-8526238-8527274
MEF2C	PLCB1	chr20-8526238-8527274
NR2E1	PLCB1	chr20-8526238-8527274
HMGA2	PLCB1	chr20-8526238-8527274
SMAD6	PLCB1	chr20-8526238-8527274
NR2E3	PLCB1	chr20-8526238-8527274
CRX	PLCB1	chr20-8526238-8527274
TCF7L1	PLCB1	chr20-8541875-8542762
ISL1	PLCB1	chr20-8541875-8542762
NR2E1	PLCB1	chr20-8541875-8542762
JAZF1	PLCB1	chr20-8541875-8542762
SOX6	PLCB1	chr20-8541875-8542762
HMGA2	PLCB1	chr20-8541875-8542762
NR2E3	PLCB1	chr20-8541875-8542762
NFIC	PLCB1	chr20-8541875-8542762
TCF7L1	PLCB1	chr20-8572158-8573128
THRB	PLCB1	chr20-8572158-8573128
ZBTB38	PLCB1	chr20-8572158-8573128
SOX2	PLCB1	chr20-8572158-8573128
MEF2C	PLCB1	chr20-8572158-8573128
PRDM13	PLCB1	chr20-8572158-8573128
NR2E1	PLCB1	chr20-8572158-8573128
GLI3	PLCB1	chr20-8572158-8573128
SOX6	PLCB1	chr20-8572158-8573128
NR4A1	PLCB1	chr20-8572158-8573128
HMGA2	PLCB1	chr20-8572158-8573128
NR2E3	PLCB1	chr20-8572158-8573128
ZBTB7C	PLCB1	chr20-8572158-8573128
ONECUT2	PLCB1	chr20-8572158-8573128
ZNF536	PLCB1	chr20-8572158-8573128
CRX	PLCB1	chr20-8572158-8573128
PPARA	PLCB1	chr20-8572158-8573128
POU6F2	PLCB1	chr20-8585841-8586203
ZBTB38	PLCB1	chr20-8602128-8602988
ISL1	PLCB1	chr20-8602128-8602988
JAZF1	PLCB1	chr20-8602128-8602988
SOX6	PLCB1	chr20-8602128-8602988
NR4A1	PLCB1	chr20-8602128-8602988
HIVEP3	PLCB1	chr20-8632405-8633339
HES6	PLCB1	chr20-8632405-8633339
PRDM8	PLCB1	chr20-8632405-8633339
PRDM13	PLCB1	chr20-8632405-8633339
NR2E1	PLCB1	chr20-8632405-8633339
JAZF1	PLCB1	chr20-8632405-8633339
PTF1A	PLCB1	chr20-8632405-8633339
NR4A1	PLCB1	chr20-8632405-8633339
NEUROD4	PLCB1	chr20-8632405-8633339
HMGA2	PLCB1	chr20-8632405-8633339
ONECUT1	PLCB1	chr20-8632405-8633339
SMAD6	PLCB1	chr20-8632405-8633339
ONECUT2	PLCB1	chr20-8632405-8633339
HIF3A	PLCB1	chr20-8632405-8633339
MYT1L	PLCB1	chr20-8661170-8662063
THRB	PLCB1	chr20-8661170-8662063
NR2E1	PLCB1	chr20-8661170-8662063
ST18	PLCB1	chr20-8661170-8662063
EBF3	PLCB1	chr20-8661170-8662063
NR4A1	PLCB1	chr20-8661170-8662063
HMGA2	PLCB1	chr20-8661170-8662063
ONECUT1	PLCB1	chr20-8661170-8662063
MYT1L	PLCB1	chr20-8662624-8663340
NR2E1	PLCB1	chr20-8662624-8663340
JAZF1	PLCB1	chr20-8662624-8663340
POU6F2	PLCB1	chr20-8662624-8663340
ST18	PLCB1	chr20-8662624-8663340
ATOH7	PLCB1	chr20-8662624-8663340
HMGA2	PLCB1	chr20-8662624-8663340
ONECUT1	PLCB1	chr20-8662624-8663340
NR2E3	PLCB1	chr20-8662624-8663340
ONECUT2	PLCB1	chr20-8662624-8663340
HIF3A	PLCB1	chr20-8662624-8663340
PPARA	PLCB1	chr20-8662624-8663340
TCF7L1	PLCB1	chr20-8663349-8663785
RARB	PLCB1	chr20-8663349-8663785
MEF2C	PLCB1	chr20-8663349-8663785
SOX6	PLCB1	chr20-8663349-8663785
HMGA2	PLCB1	chr20-8663349-8663785
NR2E3	PLCB1	chr20-8663349-8663785
NFIA	PLCB1	chr20-8670695-8671485
MYT1L	PLCB1	chr20-8670695-8671485
MEF2C	PLCB1	chr20-8670695-8671485
ST18	PLCB1	chr20-8670695-8671485
NEUROD4	PLCB1	chr20-8670695-8671485
SMAD6	PLCB1	chr20-8670695-8671485
ZBTB7C	PLCB1	chr20-8670695-8671485
NFIX	PLCB1	chr20-8670695-8671485
CRX	PLCB1	chr20-8670695-8671485
ZBTB38	PLCB1	chr20-8709546-8710421
MEF2C	PLCB1	chr20-8709546-8710421
CREB5	PLCB1	chr20-8709546-8710421
FOS	PLCB1	chr20-8709546-8710421
RAX2	PLCB1	chr20-8709546-8710421
NFIX	PLCB1	chr20-8709546-8710421
TSHZ2	PLCB1	chr20-8709546-8710421
PRDM8	PLCB1	chr20-8720803-8721679
ISL1	PLCB1	chr20-8720803-8721679
NR2E1	PLCB1	chr20-8720803-8721679
HMGA2	PLCB1	chr20-8720803-8721679
NRL	PLCB1	chr20-8720803-8721679
ONECUT1	PLCB1	chr20-8720803-8721679
NR2E3	PLCB1	chr20-8720803-8721679
ONECUT2	PLCB1	chr20-8720803-8721679
ISL1	PLCB1	chr20-8722099-8722353
JAZF1	PLCB1	chr20-8722099-8722353
NR4A1	PLCB1	chr20-8722099-8722353
HMGA2	PLCB1	chr20-8722099-8722353
ONECUT1	PLCB1	chr20-8722099-8722353
NR2E3	PLCB1	chr20-8722099-8722353
ONECUT2	PLCB1	chr20-8722099-8722353
MYT1L	PLCB1	chr20-8722422-8723023
TCF7L1	PLCB1	chr20-8722422-8723023
MEF2C	PLCB1	chr20-8722422-8723023
PRDM13	PLCB1	chr20-8722422-8723023
ST18	PLCB1	chr20-8722422-8723023
SOX6	PLCB1	chr20-8722422-8723023
NFIC	PLCB1	chr20-8722422-8723023
ZNF536	PLCB1	chr20-8722422-8723023
TSHZ2	PLCB1	chr20-8722422-8723023
HIVEP3	PLCB1	chr20-8723801-8724655
MYT1L	PLCB1	chr20-8723801-8724655
HES6	PLCB1	chr20-8723801-8724655
ZBTB38	PLCB1	chr20-8723801-8724655
ISL1	PLCB1	chr20-8723801-8724655
MEF2C	PLCB1	chr20-8723801-8724655
PRDM13	PLCB1	chr20-8723801-8724655
ST18	PLCB1	chr20-8723801-8724655
HMGA2	PLCB1	chr20-8723801-8724655
NRL	PLCB1	chr20-8723801-8724655
NR2E3	PLCB1	chr20-8723801-8724655
ZBTB7C	PLCB1	chr20-8723801-8724655
THRB	PLCB1	chr20-8753317-8754346
ZBTB38	PLCB1	chr20-8753317-8754346
MEF2C	PLCB1	chr20-8753317-8754346
PRDM13	PLCB1	chr20-8753317-8754346
NR2E1	PLCB1	chr20-8753317-8754346
CREB5	PLCB1	chr20-8753317-8754346
ATOH7	PLCB1	chr20-8753317-8754346
EBF3	PLCB1	chr20-8753317-8754346
NEUROD4	PLCB1	chr20-8753317-8754346
HMGA2	PLCB1	chr20-8753317-8754346
SMAD6	PLCB1	chr20-8753317-8754346
NR2E3	PLCB1	chr20-8753317-8754346
HIF3A	PLCB1	chr20-8753317-8754346
MYT1L	PLCB1	chr20-8759385-8760321
TCF7L1	PLCB1	chr20-8759385-8760321
ZBTB38	PLCB1	chr20-8759385-8760321
PRDM8	PLCB1	chr20-8759385-8760321
MEF2C	PLCB1	chr20-8759385-8760321
PRDM13	PLCB1	chr20-8759385-8760321
NR2E1	PLCB1	chr20-8759385-8760321
POU6F2	PLCB1	chr20-8759385-8760321
ST18	PLCB1	chr20-8759385-8760321
NR4A1	PLCB1	chr20-8759385-8760321
HMGA2	PLCB1	chr20-8759385-8760321
SMAD6	PLCB1	chr20-8759385-8760321
NR2E3	PLCB1	chr20-8759385-8760321
RAX2	PLCB1	chr20-8759385-8760321
SOX2	PLCB1	chr20-8790262-8791117
PRDM8	PLCB1	chr20-8790262-8791117
MEF2C	PLCB1	chr20-8790262-8791117
JAZF1	PLCB1	chr20-8790262-8791117
CREB5	PLCB1	chr20-8790262-8791117
SOX6	PLCB1	chr20-8790262-8791117
HMGA2	PLCB1	chr20-8790262-8791117
NRL	PLCB1	chr20-8790262-8791117
ONECUT1	PLCB1	chr20-8790262-8791117
ZBTB38	PLCB1	chr20-8823822-8824755
ETV5	PLCB1	chr20-8823822-8824755
NR2E1	PLCB1	chr20-8823822-8824755
PTF1A	PLCB1	chr20-8823822-8824755
NEUROD4	PLCB1	chr20-8823822-8824755
HMGA2	PLCB1	chr20-8823822-8824755
NR2E3	PLCB1	chr20-8823822-8824755
CRX	PLCB1	chr20-8823822-8824755
PROX1	PLCB1	chr20-8849768-8850714
TCF7L1	PLCB1	chr20-8849768-8850714
ZBTB38	PLCB1	chr20-8849768-8850714
PRDM8	PLCB1	chr20-8849768-8850714
MEF2C	PLCB1	chr20-8849768-8850714
NR2E1	PLCB1	chr20-8849768-8850714
EBF3	PLCB1	chr20-8849768-8850714
HMGA2	PLCB1	chr20-8849768-8850714
NR2E3	PLCB1	chr20-8849768-8850714
NFIC	PLCB1	chr20-8849768-8850714
CRX	PLCB1	chr20-8849768-8850714
PROX1	PLCB1	chr20-8853493-8854876
MYT1L	PLCB1	chr20-8853493-8854876
THRB	PLCB1	chr20-8853493-8854876
ZBTB38	PLCB1	chr20-8853493-8854876
PRDM8	PLCB1	chr20-8853493-8854876
MEF2C	PLCB1	chr20-8853493-8854876
PRDM13	PLCB1	chr20-8853493-8854876
GLI3	PLCB1	chr20-8853493-8854876
ST18	PLCB1	chr20-8853493-8854876
PTF1A	PLCB1	chr20-8853493-8854876
ATOH7	PLCB1	chr20-8853493-8854876
NR4A1	PLCB1	chr20-8853493-8854876
HMGA2	PLCB1	chr20-8853493-8854876
NR2E3	PLCB1	chr20-8853493-8854876
ZBTB7C	PLCB1	chr20-8853493-8854876
ZNF536	PLCB1	chr20-8853493-8854876
HIF3A	PLCB1	chr20-8853493-8854876
TSHZ2	PLCB1	chr20-8853493-8854876
HIVEP3	PLCB1	chr20-8858031-8859051
THRB	PLCB1	chr20-8858031-8859051
ZBTB38	PLCB1	chr20-8858031-8859051
NR3C2	PLCB1	chr20-8858031-8859051
MEF2C	PLCB1	chr20-8858031-8859051
JAZF1	PLCB1	chr20-8858031-8859051
NFIB	PLCB1	chr20-8858031-8859051
EBF3	PLCB1	chr20-8858031-8859051
SOX6	PLCB1	chr20-8858031-8859051
HMGA2	PLCB1	chr20-8858031-8859051
NR2E3	PLCB1	chr20-8858031-8859051
TSHZ2	PLCB1	chr20-8858031-8859051
PPARA	PLCB1	chr20-8858031-8859051
THRB	PLCB1	chr20-8861912-8862866
MEF2C	PLCB1	chr20-8861912-8862866
NR2E1	PLCB1	chr20-8861912-8862866
CREB5	PLCB1	chr20-8861912-8862866
HMGA2	PLCB1	chr20-8861912-8862866
ONECUT1	PLCB1	chr20-8861912-8862866
NR2E3	PLCB1	chr20-8861912-8862866
ONECUT2	PLCB1	chr20-8861912-8862866
CRX	PLCB1	chr20-8861912-8862866
THRB	PLCB1	chr20-8866786-8867913
RARB	PLCB1	chr20-8866786-8867913
MEF2C	PLCB1	chr20-8866786-8867913
NR2E1	PLCB1	chr20-8866786-8867913
JAZF1	PLCB1	chr20-8866786-8867913
POU6F2	PLCB1	chr20-8866786-8867913
HMGA2	PLCB1	chr20-8866786-8867913
VSX2	PLCB1	chr20-8866786-8867913
ONECUT1	PLCB1	chr20-8866786-8867913
NR2E3	PLCB1	chr20-8866786-8867913
ONECUT2	PLCB1	chr20-8866786-8867913
CRX	PLCB1	chr20-8866786-8867913
VSX1	PLCB1	chr20-8866786-8867913
THRB	PLCB1	chr20-8877058-8877950
PRDM8	PLCB1	chr20-8877058-8877950
ISL1	PLCB1	chr20-8877058-8877950
NFIB	PLCB1	chr20-8877058-8877950
NR2E3	PLCB1	chr20-8877058-8877950
NFIC	PLCB1	chr20-8877058-8877950
NFIX	PLCB1	chr20-8877058-8877950
CRX	PLCB1	chr20-8877058-8877950
PPARA	PLCB1	chr20-8877058-8877950
TCF7L1	PLCB1	chr20-8888943-8889834
ZBTB38	PLCB1	chr20-8888943-8889834
ISL1	PLCB1	chr20-8888943-8889834
MEF2C	PLCB1	chr20-8888943-8889834
NR2E1	PLCB1	chr20-8888943-8889834
NFIB	PLCB1	chr20-8888943-8889834
PTF1A	PLCB1	chr20-8888943-8889834
NEUROD4	PLCB1	chr20-8888943-8889834
HMGA2	PLCB1	chr20-8888943-8889834
NR2E3	PLCB1	chr20-8888943-8889834
MYT1L	PLCB1	chr20-8912480-8913332
TCF7L1	PLCB1	chr20-8912480-8913332
MEF2C	PLCB1	chr20-8912480-8913332
BACH2	PLCB1	chr20-8912480-8913332
PRDM13	PLCB1	chr20-8912480-8913332
NR2E1	PLCB1	chr20-8912480-8913332
ST18	PLCB1	chr20-8912480-8913332
ATOH7	PLCB1	chr20-8912480-8913332
NEUROD4	PLCB1	chr20-8912480-8913332
HMGA2	PLCB1	chr20-8912480-8913332
FOS	PLCB1	chr20-8912480-8913332
NR2E3	PLCB1	chr20-8912480-8913332
HIF3A	PLCB1	chr20-8912480-8913332
CRX	PLCB1	chr20-8912480-8913332
PRDM8	PLCB1	chr20-8941219-8942095
NR2E1	PLCB1	chr20-8941219-8942095
HMGA2	PLCB1	chr20-8941219-8942095
NRL	PLCB1	chr20-8941219-8942095
NR2E3	PLCB1	chr20-8941219-8942095
CRX	PLCB1	chr20-8941219-8942095
THRB	PLCB1	chr20-8946223-8947161
SOX2	PLCB1	chr20-8946223-8947161
JAZF1	PLCB1	chr20-8946223-8947161
PTF1A	PLCB1	chr20-8946223-8947161
EBF3	PLCB1	chr20-8946223-8947161
HMGA2	PLCB1	chr20-8946223-8947161
NR2E3	PLCB1	chr20-8946223-8947161
ZNF536	PLCB1	chr20-8946223-8947161
CRX	PLCB1	chr20-8946223-8947161
TSHZ2	PLCB1	chr20-8946223-8947161
TCF7L1	PLCB1	chr20-8949719-8950709
THRB	PLCB1	chr20-8949719-8950709
MEF2C	PLCB1	chr20-8949719-8950709
PTF1A	PLCB1	chr20-8949719-8950709
NR4A1	PLCB1	chr20-8949719-8950709
NEUROD4	PLCB1	chr20-8949719-8950709
HMGA2	PLCB1	chr20-8949719-8950709
SMAD6	PLCB1	chr20-8949719-8950709
NR2E3	PLCB1	chr20-8949719-8950709
NFIC	PLCB1	chr20-8949719-8950709
PPARA	PLCB1	chr20-8949719-8950709
NFIA	PLCB1	chr20-8964780-8965089
HES6	PLCB1	chr20-8964780-8965089
PRDM8	PLCB1	chr20-8964780-8965089
SMAD6	PLCB1	chr20-8964780-8965089
NFIC	PLCB1	chr20-8964780-8965089
NFIX	PLCB1	chr20-8964780-8965089
TCF7L1	PLCB1	chr20-8965436-8965834
NEUROD4	PLCB1	chr20-8965436-8965834
ONECUT1	PLCB1	chr20-8965436-8965834
NR2E3	PLCB1	chr20-8965436-8965834
TFAP2A	PLCB4	chr20-8990764-8991728
TFAP2B	PLCB4	chr20-8990764-8991728
ZFPM2	PLCB4	chr20-8990764-8991728
ESRRG	PLCB4	chr20-8996758-8998719
PRDM8	PLCB4	chr20-8996758-8998719
ISL1	PLCB4	chr20-8996758-8998719
TFAP2A	PLCB4	chr20-8996758-8998719
TFAP2B	PLCB4	chr20-8996758-8998719
ZFPM2	PLCB4	chr20-8996758-8998719
NEUROD4	PLCB4	chr20-8996758-8998719
ONECUT1	PLCB4	chr20-8996758-8998719
ZFHX3	PLCB4	chr20-8996758-8998719
ONECUT3	PLCB4	chr20-8996758-8998719
ZNF536	PLCB4	chr20-8996758-8998719
TSHZ2	PLCB4	chr20-8996758-8998719
ESRRG	PLCB4	chr20-9028046-9028951
ISL1	PLCB4	chr20-9028046-9028951
BACH2	PLCB4	chr20-9028046-9028951
ATOH7	PLCB4	chr20-9028046-9028951
ZNF521	PLCB4	chr20-9028046-9028951
HIF3A	PLCB4	chr20-9028046-9028951
MYT1L	PLCB4	chr20-9050249-9051188
ST18	PLCB4	chr20-9050249-9051188
ZFPM2	PLCB4	chr20-9050249-9051188
ZNF521	PLCB4	chr20-9050249-9051188
ONECUT3	PLCB4	chr20-9050249-9051188
ZNF536	PLCB4	chr20-9050249-9051188
TSHZ2	PLCB4	chr20-9050249-9051188
ESRRG	PLCB4	chr20-9055453-9056322
HIF3A	PLCB4	chr20-9055453-9056322
HES5	PLCB4	chr20-9066189-9068762
HIVEP3	PLCB4	chr20-9066189-9068762
ESRRG	PLCB4	chr20-9066189-9068762
MYT1L	PLCB4	chr20-9066189-9068762
PRDM8	PLCB4	chr20-9066189-9068762
ISL1	PLCB4	chr20-9066189-9068762
EGR1	PLCB4	chr20-9066189-9068762
TFAP2A	PLCB4	chr20-9066189-9068762
TFAP2B	PLCB4	chr20-9066189-9068762
ST18	PLCB4	chr20-9066189-9068762
ZFPM2	PLCB4	chr20-9066189-9068762
ONECUT1	PLCB4	chr20-9066189-9068762
ZNF521	PLCB4	chr20-9066189-9068762
ZNF536	PLCB4	chr20-9066189-9068762
HIF3A	PLCB4	chr20-9066189-9068762
TSHZ2	PLCB4	chr20-9066189-9068762
ESRRG	PLCB4	chr20-9078950-9079849
HES6	PLCB4	chr20-9078950-9079849
PRDM8	PLCB4	chr20-9078950-9079849
ISL1	PLCB4	chr20-9078950-9079849
ZFPM2	PLCB4	chr20-9078950-9079849
NEUROD4	PLCB4	chr20-9078950-9079849
ZNF521	PLCB4	chr20-9078950-9079849
TSHZ2	PLCB4	chr20-9078950-9079849
MYT1L	PLCB4	chr20-9094394-9095380
PRDM8	PLCB4	chr20-9094394-9095380
ISL1	PLCB4	chr20-9094394-9095380
ST18	PLCB4	chr20-9094394-9095380
CUX2	PLCB4	chr20-9094394-9095380
ONECUT3	PLCB4	chr20-9094394-9095380
TFAP2A	PLCB4	chr20-9100549-9101437
BACH2	PLCB4	chr20-9100549-9101437
NEUROD4	PLCB4	chr20-9100549-9101437
ONECUT3	PLCB4	chr20-9100549-9101437
HIF3A	PLCB4	chr20-9100549-9101437
PROX1	PLCB4	chr20-9107745-9108828
ESRRG	PLCB4	chr20-9107745-9108828
PRDM8	PLCB4	chr20-9107745-9108828
ISL1	PLCB4	chr20-9107745-9108828
BACH2	PLCB4	chr20-9107745-9108828
ONECUT1	PLCB4	chr20-9107745-9108828
ZFHX3	PLCB4	chr20-9107745-9108828
ONECUT3	PLCB4	chr20-9107745-9108828
VSX1	PLCB4	chr20-9107745-9108828
ESRRG	PLCB4	chr20-9114422-9115182
ZFPM2	PLCB4	chr20-9114422-9115182
ZNF521	PLCB4	chr20-9114422-9115182
TSHZ2	PLCB4	chr20-9114422-9115182
ESRRG	PLCB4	chr20-9119553-9120512
TFAP2A	PLCB4	chr20-9119553-9120512
TFAP2B	PLCB4	chr20-9119553-9120512
ZFPM2	PLCB4	chr20-9119553-9120512
NEUROD4	PLCB4	chr20-9119553-9120512
ZFHX3	PLCB4	chr20-9119553-9120512
HIF3A	PLCB4	chr20-9119553-9120512
VSX1	PLCB4	chr20-9119553-9120512
ZNF521	PLCB4	chr20-9122293-9123264
HIVEP3	PLCB4	chr20-9185266-9186202
ESRRG	PLCB4	chr20-9185266-9186202
ISL1	PLCB4	chr20-9185266-9186202
BACH2	PLCB4	chr20-9185266-9186202
CREB5	PLCB4	chr20-9185266-9186202
ZNF521	PLCB4	chr20-9185266-9186202
HIVEP3	PLCB4	chr20-9236188-9237089
PRDM8	PLCB4	chr20-9236188-9237089
ISL1	PLCB4	chr20-9236188-9237089
CREB5	PLCB4	chr20-9236188-9237089
ZNF521	PLCB4	chr20-9236188-9237089
ESRRG	PLCB4	chr20-9269066-9269979
PRDM8	PLCB4	chr20-9269066-9269979
ISL1	PLCB4	chr20-9269066-9269979
ZNF536	PLCB4	chr20-9269066-9269979
HIVEP3	PLCB4	chr20-9277036-9278033
ZNF521	PLCB4	chr20-9277036-9278033
HIVEP3	PLCB4	chr20-9301408-9302325
PRDM8	PLCB4	chr20-9301408-9302325
ZFPM2	PLCB4	chr20-9301408-9302325
ZNF521	PLCB4	chr20-9301408-9302325
ZNF536	PLCB4	chr20-9301408-9302325
TSHZ2	PLCB4	chr20-9301408-9302325
HIVEP3	PLCB4	chr20-9318721-9319501
ZFPM2	PLCB4	chr20-9318721-9319501
ZNF521	PLCB4	chr20-9318721-9319501
TSHZ2	PLCB4	chr20-9318721-9319501
HIVEP3	PLCB4	chr20-9324244-9325069
TFAP2A	PLCB4	chr20-9324244-9325069
ZNF521	PLCB4	chr20-9324244-9325069
ZFPM2	PLCB4	chr20-9325360-9326387
ZNF521	PLCB4	chr20-9325360-9326387
ZNF536	PLCB4	chr20-9325360-9326387
TSHZ2	PLCB4	chr20-9325360-9326387
ESRRG	PLCB4	chr20-9331766-9332807
PRDM8	PLCB4	chr20-9331766-9332807
ESRRG	PLCB4	chr20-9344353-9345307
ONECUT1	PLCB4	chr20-9344353-9345307
ZNF521	PLCB4	chr20-9344353-9345307
ESRRG	PLCB4	chr20-9352972-9353871
EGR1	PLCB4	chr20-9352972-9353871
ZFPM2	PLCB4	chr20-9352972-9353871
ZNF521	PLCB4	chr20-9352972-9353871
ZNF536	PLCB4	chr20-9352972-9353871
TSHZ2	PLCB4	chr20-9352972-9353871
ESRRG	PLCB4	chr20-9359390-9360399
PRDM8	PLCB4	chr20-9359390-9360399
TFAP2A	PLCB4	chr20-9359390-9360399
TFAP2B	PLCB4	chr20-9359390-9360399
ZFPM2	PLCB4	chr20-9359390-9360399
ONECUT1	PLCB4	chr20-9359390-9360399
ZNF521	PLCB4	chr20-9359390-9360399
TSHZ2	PLCB4	chr20-9359390-9360399
HIVEP3	PLCB4	chr20-9361601-9362530
ESRRG	PLCB4	chr20-9361601-9362530
PRDM8	PLCB4	chr20-9361601-9362530
ATOH7	PLCB4	chr20-9361601-9362530
NEUROD4	PLCB4	chr20-9361601-9362530
ZNF521	PLCB4	chr20-9361601-9362530
HIF3A	PLCB4	chr20-9361601-9362530
ESRRG	PLCB4	chr20-9371734-9372302
TFAP2A	PLCB4	chr20-9371734-9372302
TFAP2B	PLCB4	chr20-9371734-9372302
BACH2	PLCB4	chr20-9371734-9372302
ONECUT1	PLCB4	chr20-9371734-9372302
ZNF521	PLCB4	chr20-9371734-9372302
ONECUT3	PLCB4	chr20-9372404-9372654
PRDM8	PLCB4	chr20-9392897-9393587
EGR1	PLCB4	chr20-9392897-9393587
TFAP2A	PLCB4	chr20-9392897-9393587
ZNF536	PLCB4	chr20-9392897-9393587
ESRRG	PLCB4	chr20-9397650-9398661
PRDM8	PLCB4	chr20-9397650-9398661
ZFHX3	PLCB4	chr20-9397650-9398661
ZNF521	PLCB4	chr20-9397650-9398661
PROX1	PLCB4	chr20-9408059-9408632
ESRRG	PLCB4	chr20-9408059-9408632
TFAP2B	PLCB4	chr20-9408059-9408632
NEUROD4	PLCB4	chr20-9408059-9408632
ATOH7	PLCB4	chr20-9409182-9409727
NEUROD4	PLCB4	chr20-9409182-9409727
HIF3A	PLCB4	chr20-9409182-9409727
RARB	PLCB4	chr20-9430338-9431227
PRDM8	PLCB4	chr20-9430338-9431227
ISL1	PLCB4	chr20-9430338-9431227
ATOH7	PLCB4	chr20-9430338-9431227
NEUROD4	PLCB4	chr20-9430338-9431227
HIF3A	PLCB4	chr20-9430338-9431227
ONECUT1	PLCB4	chr20-9442642-9443531
ZNF521	PLCB4	chr20-9442642-9443531
ONECUT3	PLCB4	chr20-9442642-9443531
MYT1L	PLCB4	chr20-9467643-9468570
RARB	PLCB4	chr20-9467643-9468570
PRDM8	PLCB4	chr20-9467643-9468570
ISL1	PLCB4	chr20-9467643-9468570
ST18	PLCB4	chr20-9467643-9468570
ZFPM2	PLCB4	chr20-9467643-9468570
ZNF521	PLCB4	chr20-9467643-9468570
ZNF536	PLCB4	chr20-9467643-9468570
RARB	LAMP5	chr20-9430338-9431227
MITF	LAMP5	chr20-9430338-9431227
PRDM8	LAMP5	chr20-9430338-9431227
ATOH7	LAMP5	chr20-9430338-9431227
NFIC	LAMP5	chr20-9430338-9431227
HIF3A	LAMP5	chr20-9430338-9431227
HMGA2	LAMP5	chr20-9442642-9443531
RARB	LAMP5	chr20-9467643-9468570
PRDM8	LAMP5	chr20-9467643-9468570
GLI3	LAMP5	chr20-9467643-9468570
HMGA2	LAMP5	chr20-9467643-9468570
ZNF536	LAMP5	chr20-9467643-9468570
MEF2C	LAMP5	chr20-9491329-9492164
HMGA2	LAMP5	chr20-9491329-9492164
ZFHX3	LAMP5	chr20-9491329-9492164
NFIC	LAMP5	chr20-9491329-9492164
RAX2	LAMP5	chr20-9491329-9492164
JAZF1	LAMP5	chr20-9494342-9495177
SOX6	LAMP5	chr20-9494342-9495177
NR4A1	LAMP5	chr20-9494342-9495177
FOS	LAMP5	chr20-9494342-9495177
HIF3A	LAMP5	chr20-9494342-9495177
HES1	LAMP5	chr20-9506226-9509295
PRDM8	LAMP5	chr20-9506226-9509295
EGR1	LAMP5	chr20-9506226-9509295
GLI3	LAMP5	chr20-9506226-9509295
GLIS3	LAMP5	chr20-9506226-9509295
SOX6	LAMP5	chr20-9506226-9509295
HMGA2	LAMP5	chr20-9506226-9509295
NFIC	LAMP5	chr20-9506226-9509295
NFIX	LAMP5	chr20-9506226-9509295
ZNF536	LAMP5	chr20-9506226-9509295
HIF3A	LAMP5	chr20-9506226-9509295
PRDM8	LAMP5	chr20-9514917-9515452
HMGA2	LAMP5	chr20-9514917-9515452
HIF3A	LAMP5	chr20-9514917-9515452
EGR1	LAMP5	chr20-9515626-9515999
JAZF1	LAMP5	chr20-9515626-9515999
NR4A1	LAMP5	chr20-9516362-9516767
ZNF536	LAMP5	chr20-9516362-9516767
PRDM8	LAMP5	chr20-9517847-9517951
JAZF1	LAMP5	chr20-9517847-9517951
HMGA2	LAMP5	chr20-9517847-9517951
PRDM8	LAMP5	chr20-9518810-9519116
EGR1	LAMP5	chr20-9518810-9519116
JAZF1	LAMP5	chr20-9518810-9519116
HIF3A	LAMP5	chr20-9518810-9519116
MITF	LAMP5	chr20-9520006-9521417
JAZF1	LAMP5	chr20-9520006-9521417
FOS	LAMP5	chr20-9520006-9521417
ZFHX3	LAMP5	chr20-9520006-9521417
NFIC	LAMP5	chr20-9520006-9521417
HIF3A	LAMP5	chr20-9520006-9521417
VSX1	LAMP5	chr20-9520006-9521417
MEF2C	LAMP5	chr20-9524268-9525166
SOX6	LAMP5	chr20-9524268-9525166
HMGA2	LAMP5	chr20-9524268-9525166
EBF1	PAK5	chr20-9442642-9443531
ONECUT1	PAK5	chr20-9442642-9443531
NR2E3	PAK5	chr20-9442642-9443531
ZNF521	PAK5	chr20-9442642-9443531
ONECUT3	PAK5	chr20-9442642-9443531
RXRG	PAK5	chr20-9467643-9468570
MYT1L	PAK5	chr20-9467643-9468570
ISL1	PAK5	chr20-9467643-9468570
EBF1	PAK5	chr20-9467643-9468570
PRDM13	PAK5	chr20-9467643-9468570
PRDM1	PAK5	chr20-9467643-9468570
ZFPM2	PAK5	chr20-9467643-9468570
NR2E3	PAK5	chr20-9467643-9468570
ZNF521	PAK5	chr20-9467643-9468570
ESRRG	PAK5	chr20-9491329-9492164
ISL1	PAK5	chr20-9491329-9492164
MEIS2	PAK5	chr20-9491329-9492164
NR2E3	PAK5	chr20-9491329-9492164
ZFHX3	PAK5	chr20-9491329-9492164
ZNF521	PAK5	chr20-9491329-9492164
TFAP2A	PAK5	chr20-9494342-9495177
PRDM1	PAK5	chr20-9494342-9495177
ZFPM2	PAK5	chr20-9494342-9495177
NR2E3	PAK5	chr20-9494342-9495177
ONECUT2	PAK5	chr20-9494342-9495177
ONECUT3	PAK5	chr20-9494342-9495177
POU2F2	PAK5	chr20-9494342-9495177
CRX	PAK5	chr20-9494342-9495177
HES5	PAK5	chr20-9506226-9509295
HIVEP3	PAK5	chr20-9506226-9509295
RXRG	PAK5	chr20-9506226-9509295
ESRRG	PAK5	chr20-9506226-9509295
NEUROD1	PAK5	chr20-9506226-9509295
EBF1	PAK5	chr20-9506226-9509295
RREB1	PAK5	chr20-9506226-9509295
TFAP2A	PAK5	chr20-9506226-9509295
TFAP2B	PAK5	chr20-9506226-9509295
PRDM13	PAK5	chr20-9506226-9509295
ZFPM2	PAK5	chr20-9506226-9509295
ZNF521	PAK5	chr20-9506226-9509295
CRX	PAK5	chr20-9506226-9509295
TSHZ2	PAK5	chr20-9506226-9509295
RXRG	PAK5	chr20-9513960-9514357
PRDM13	PAK5	chr20-9513960-9514357
ISL1	PAK5	chr20-9514917-9515452
NR2E3	PAK5	chr20-9514917-9515452
POU2F2	PAK5	chr20-9514917-9515452
TFAP2A	PAK5	chr20-9515626-9515999
TFAP2B	PAK5	chr20-9516132-9516255
ZFPM2	PAK5	chr20-9516362-9516767
TSHZ2	PAK5	chr20-9516362-9516767
ESRRG	PAK5	chr20-9518810-9519116
HES5	PAK5	chr20-9520006-9521417
HIVEP3	PAK5	chr20-9520006-9521417
ISL1	PAK5	chr20-9520006-9521417
RREB1	PAK5	chr20-9520006-9521417
PRDM13	PAK5	chr20-9520006-9521417
ZFPM2	PAK5	chr20-9520006-9521417
MEIS2	PAK5	chr20-9520006-9521417
ZFHX3	PAK5	chr20-9520006-9521417
ZNF521	PAK5	chr20-9520006-9521417
POU2F2	PAK5	chr20-9520006-9521417
TSHZ2	PAK5	chr20-9520006-9521417
PRDM13	PAK5	chr20-9524268-9525166
PRDM1	PAK5	chr20-9524268-9525166
ZFPM2	PAK5	chr20-9524268-9525166
MEIS2	PAK5	chr20-9524268-9525166
ONECUT1	PAK5	chr20-9524268-9525166
NR2E3	PAK5	chr20-9524268-9525166
ONECUT2	PAK5	chr20-9524268-9525166
ONECUT3	PAK5	chr20-9524268-9525166
CRX	PAK5	chr20-9524268-9525166
HIVEP3	PAK5	chr20-9531834-9532854
RXRG	PAK5	chr20-9531834-9532854
ESRRG	PAK5	chr20-9531834-9532854
NEUROD1	PAK5	chr20-9531834-9532854
ISL1	PAK5	chr20-9531834-9532854
RREB1	PAK5	chr20-9531834-9532854
TFAP2A	PAK5	chr20-9531834-9532854
TFAP2B	PAK5	chr20-9531834-9532854
PRDM1	PAK5	chr20-9531834-9532854
ZFPM2	PAK5	chr20-9531834-9532854
NFIB	PAK5	chr20-9531834-9532854
ZNF521	PAK5	chr20-9531834-9532854
RXRG	PAK5	chr20-9535193-9536193
ESRRG	PAK5	chr20-9535193-9536193
NEUROD1	PAK5	chr20-9535193-9536193
EBF1	PAK5	chr20-9535193-9536193
PRDM13	PAK5	chr20-9535193-9536193
PRDM1	PAK5	chr20-9535193-9536193
ZFPM2	PAK5	chr20-9535193-9536193
ATOH7	PAK5	chr20-9535193-9536193
ESRRB	PAK5	chr20-9535193-9536193
ONECUT1	PAK5	chr20-9535193-9536193
NR2E3	PAK5	chr20-9535193-9536193
ONECUT2	PAK5	chr20-9535193-9536193
ONECUT3	PAK5	chr20-9535193-9536193
NR2E3	PAK5	chr20-9570717-9570806
TFAP2A	PAK5	chr20-9571511-9572204
TFAP2B	PAK5	chr20-9571511-9572204
PRDM13	PAK5	chr20-9571511-9572204
MEIS2	PAK5	chr20-9571511-9572204
ONECUT1	PAK5	chr20-9571511-9572204
ZNF521	PAK5	chr20-9571511-9572204
ONECUT2	PAK5	chr20-9571511-9572204
ONECUT3	PAK5	chr20-9571511-9572204
HIVEP3	PAK5	chr20-9572269-9575329
RXRG	PAK5	chr20-9572269-9575329
MYT1L	PAK5	chr20-9572269-9575329
RREB1	PAK5	chr20-9572269-9575329
BACH2	PAK5	chr20-9572269-9575329
PRDM13	PAK5	chr20-9572269-9575329
PRDM1	PAK5	chr20-9572269-9575329
ZFPM2	PAK5	chr20-9572269-9575329
OTX2	PAK5	chr20-9572269-9575329
MEIS2	PAK5	chr20-9572269-9575329
ONECUT1	PAK5	chr20-9572269-9575329
NR2E3	PAK5	chr20-9572269-9575329
LHX1	PAK5	chr20-9572269-9575329
ZNF521	PAK5	chr20-9572269-9575329
CRX	PAK5	chr20-9572269-9575329
TSHZ2	PAK5	chr20-9572269-9575329
NR2E3	PAK5	chr20-9576244-9577215
ZFHX3	PAK5	chr20-9576244-9577215
CRX	PAK5	chr20-9576244-9577215
ONECUT1	PAK5	chr20-9588668-9589022
NR2E3	PAK5	chr20-9588668-9589022
ONECUT2	PAK5	chr20-9588668-9589022
ONECUT3	PAK5	chr20-9588668-9589022
ESRRG	PAK5	chr20-9600137-9601219
PRDM13	PAK5	chr20-9600137-9601219
PRDM1	PAK5	chr20-9600137-9601219
ZFPM2	PAK5	chr20-9600137-9601219
OTX2	PAK5	chr20-9600137-9601219
MEIS2	PAK5	chr20-9600137-9601219
ONECUT1	PAK5	chr20-9600137-9601219
NR2E3	PAK5	chr20-9600137-9601219
ONECUT2	PAK5	chr20-9600137-9601219
ONECUT3	PAK5	chr20-9600137-9601219
CRX	PAK5	chr20-9600137-9601219
NEUROD1	PAK5	chr20-9602609-9603446
TFAP2A	PAK5	chr20-9602609-9603446
TFAP2B	PAK5	chr20-9602609-9603446
PRDM13	PAK5	chr20-9602609-9603446
MEIS2	PAK5	chr20-9602609-9603446
NR2E3	PAK5	chr20-9602609-9603446
ZFHX3	PAK5	chr20-9602609-9603446
HIVEP3	PAK5	chr20-9608410-9610567
ESRRG	PAK5	chr20-9608410-9610567
NEUROD1	PAK5	chr20-9608410-9610567
RREB1	PAK5	chr20-9608410-9610567
PRDM13	PAK5	chr20-9608410-9610567
ZFPM2	PAK5	chr20-9608410-9610567
NFIB	PAK5	chr20-9608410-9610567
NR2E3	PAK5	chr20-9608410-9610567
ZNF521	PAK5	chr20-9608410-9610567
POU2F2	PAK5	chr20-9608410-9610567
TSHZ2	PAK5	chr20-9608410-9610567
HIVEP3	PAK5	chr20-9616753-9617760
RREB1	PAK5	chr20-9616753-9617760
TFAP2B	PAK5	chr20-9616753-9617760
PRDM1	PAK5	chr20-9616753-9617760
ZFPM2	PAK5	chr20-9616753-9617760
MEIS2	PAK5	chr20-9616753-9617760
NR2E3	PAK5	chr20-9616753-9617760
ZFHX3	PAK5	chr20-9616753-9617760
ZNF521	PAK5	chr20-9616753-9617760
POU2F2	PAK5	chr20-9616753-9617760
TSHZ2	PAK5	chr20-9616753-9617760
HES5	PAK5	chr20-9617899-9618722
ATOH7	PAK5	chr20-9617899-9618722
MEIS2	PAK5	chr20-9617899-9618722
CRX	PAK5	chr20-9617899-9618722
ISL1	PAK5	chr20-9673437-9674354
POU2F2	PAK5	chr20-9673437-9674354
TFAP2A	PAK5	chr20-9674627-9675403
TFAP2B	PAK5	chr20-9674627-9675403
ZFPM2	PAK5	chr20-9674627-9675403
NR2E3	PAK5	chr20-9674627-9675403
ZNF521	PAK5	chr20-9674627-9675403
TSHZ2	PAK5	chr20-9674627-9675403
RXRG	PAK5	chr20-9679203-9680217
ESRRG	PAK5	chr20-9679203-9680217
ISL1	PAK5	chr20-9679203-9680217
EBF1	PAK5	chr20-9679203-9680217
BACH2	PAK5	chr20-9679203-9680217
NRL	PAK5	chr20-9679203-9680217
ESRRB	PAK5	chr20-9679203-9680217
ONECUT1	PAK5	chr20-9679203-9680217
NR2E3	PAK5	chr20-9679203-9680217
ZNF521	PAK5	chr20-9679203-9680217
CRX	PAK5	chr20-9679203-9680217
ESRRG	PAK5	chr20-9685589-9686550
TSHZ2	PAK5	chr20-9685589-9686550
PRDM1	PAK5	chr20-9718575-9719392
ZFPM2	PAK5	chr20-9718575-9719392
MEIS2	PAK5	chr20-9718575-9719392
NR2E3	PAK5	chr20-9718575-9719392
ZNF521	PAK5	chr20-9718575-9719392
TFAP2B	PAK5	chr20-9719480-9720274
OTX2	PAK5	chr20-9719480-9720274
ONECUT1	PAK5	chr20-9719480-9720274
NR2E3	PAK5	chr20-9719480-9720274
ZNF521	PAK5	chr20-9719480-9720274
ONECUT2	PAK5	chr20-9719480-9720274
ONECUT3	PAK5	chr20-9719480-9720274
CRX	PAK5	chr20-9719480-9720274
RXRG	PAK5	chr20-9730409-9731325
BACH2	PAK5	chr20-9730409-9731325
PRDM1	PAK5	chr20-9730409-9731325
ZFPM2	PAK5	chr20-9730409-9731325
MEIS2	PAK5	chr20-9730409-9731325
NR2E3	PAK5	chr20-9730409-9731325
HIVEP3	PAK5	chr20-9742638-9743493
RREB1	PAK5	chr20-9742638-9743493
TFAP2A	PAK5	chr20-9742638-9743493
ESRRB	PAK5	chr20-9742638-9743493
ZNF521	PAK5	chr20-9742638-9743493
ESRRG	PAK5	chr20-9785528-9786614
NEUROD1	PAK5	chr20-9785528-9786614
PRDM13	PAK5	chr20-9785528-9786614
PRDM1	PAK5	chr20-9785528-9786614
ZFPM2	PAK5	chr20-9785528-9786614
ESRRB	PAK5	chr20-9785528-9786614
ZFHX3	PAK5	chr20-9785528-9786614
ZNF521	PAK5	chr20-9785528-9786614
POU2F2	PAK5	chr20-9785528-9786614
TSHZ2	PAK5	chr20-9785528-9786614
ESRRG	PAK5	chr20-9803184-9803411
ONECUT1	PAK5	chr20-9803184-9803411
ONECUT2	PAK5	chr20-9803184-9803411
ONECUT3	PAK5	chr20-9803184-9803411
HIVEP3	PAK5	chr20-9837613-9838761
RREB1	PAK5	chr20-9837613-9838761
TFAP2A	PAK5	chr20-9837613-9838761
TFAP2B	PAK5	chr20-9837613-9838761
PRDM13	PAK5	chr20-9837613-9838761
PRDM1	PAK5	chr20-9837613-9838761
ZFPM2	PAK5	chr20-9837613-9838761
NFIB	PAK5	chr20-9837613-9838761
MEIS2	PAK5	chr20-9837613-9838761
NR2E3	PAK5	chr20-9837613-9838761
ZNF521	PAK5	chr20-9837613-9838761
TSHZ2	PAK5	chr20-9837613-9838761
MYT1L	PAK5	chr20-9839042-9839796
EBF1	PAK5	chr20-9839042-9839796
RXRG	PAK5	chr20-9883932-9884788
EBF1	PAK5	chr20-9883932-9884788
PRDM13	PAK5	chr20-9883932-9884788
ZFPM2	PAK5	chr20-9883932-9884788
NR2E3	PAK5	chr20-9883932-9884788
ZNF521	PAK5	chr20-9883932-9884788
TSHZ2	PAK5	chr20-9883932-9884788
ESRRG	PAK5	chr20-9912393-9913561
OTX2	PAK5	chr20-9912393-9913561
ESRRB	PAK5	chr20-9912393-9913561
ONECUT1	PAK5	chr20-9912393-9913561
NR2E3	PAK5	chr20-9912393-9913561
ZFHX3	PAK5	chr20-9912393-9913561
ONECUT3	PAK5	chr20-9912393-9913561
HIVEP3	PAK5	chr20-9916370-9917467
ESRRG	PAK5	chr20-9916370-9917467
EBF1	PAK5	chr20-9916370-9917467
RREB1	PAK5	chr20-9916370-9917467
MEIS2	PAK5	chr20-9916370-9917467
ZNF521	PAK5	chr20-9916370-9917467
TFAP2A	PAK5	chr20-9919626-9920654
TFAP2B	PAK5	chr20-9919626-9920654
PRDM1	PAK5	chr20-9919626-9920654
ZFPM2	PAK5	chr20-9919626-9920654
OTX2	PAK5	chr20-9919626-9920654
NR2E3	PAK5	chr20-9919626-9920654
ZNF521	PAK5	chr20-9919626-9920654
CRX	PAK5	chr20-9919626-9920654
RXRG	PAK5	chr20-9925715-9926626
ESRRG	PAK5	chr20-9925715-9926626
ISL1	PAK5	chr20-9925715-9926626
BACH2	PAK5	chr20-9925715-9926626
PRDM13	PAK5	chr20-9925715-9926626
PRDM1	PAK5	chr20-9925715-9926626
ZFPM2	PAK5	chr20-9925715-9926626
ZNF521	PAK5	chr20-9925715-9926626
CRX	PAK5	chr20-9925715-9926626
KLF7	SNAP25	chr20-10128021-10128904
PRDM8	SNAP25	chr20-10128021-10128904
PBX3	SNAP25	chr20-10128021-10128904
PTF1A	SNAP25	chr20-10128021-10128904
SOX6	SNAP25	chr20-10128021-10128904
NRL	SNAP25	chr20-10128021-10128904
MEIS2	SNAP25	chr20-10128021-10128904
NFIC	SNAP25	chr20-10128021-10128904
CRX	SNAP25	chr20-10128021-10128904
NEUROD1	SNAP25	chr20-10131592-10132561
RARB	SNAP25	chr20-10131592-10132561
PRDM13	SNAP25	chr20-10131592-10132561
JAZF1	SNAP25	chr20-10131592-10132561
NFIB	SNAP25	chr20-10131592-10132561
PTF1A	SNAP25	chr20-10131592-10132561
ATOH7	SNAP25	chr20-10131592-10132561
NFIC	SNAP25	chr20-10131592-10132561
NFIX	SNAP25	chr20-10131592-10132561
HIF3A	SNAP25	chr20-10131592-10132561
ZNF83	SNAP25	chr20-10131592-10132561
LHX4	SNAP25	chr20-10137342-10138244
PRDM13	SNAP25	chr20-10137342-10138244
SOX6	SNAP25	chr20-10137342-10138244
OTX2	SNAP25	chr20-10137342-10138244
NR2E3	SNAP25	chr20-10137342-10138244
ONECUT2	SNAP25	chr20-10137342-10138244
CRX	SNAP25	chr20-10137342-10138244
ZNF83	SNAP25	chr20-10137342-10138244
KLF7	SNAP25	chr20-10171793-10173092
PRDM8	SNAP25	chr20-10171793-10173092
MEF2C	SNAP25	chr20-10171793-10173092
EBF1	SNAP25	chr20-10171793-10173092
RREB1	SNAP25	chr20-10171793-10173092
BACH2	SNAP25	chr20-10171793-10173092
PRDM13	SNAP25	chr20-10171793-10173092
JAZF1	SNAP25	chr20-10171793-10173092
NFIB	SNAP25	chr20-10171793-10173092
HMGA2	SNAP25	chr20-10171793-10173092
MEIS2	SNAP25	chr20-10171793-10173092
NFIC	SNAP25	chr20-10171793-10173092
NFIX	SNAP25	chr20-10171793-10173092
CRX	SNAP25	chr20-10171793-10173092
ZNF83	SNAP25	chr20-10171793-10173092
MEF2C	SNAP25	chr20-10175208-10176178
PRDM13	SNAP25	chr20-10175208-10176178
NFIB	SNAP25	chr20-10175208-10176178
PBX3	SNAP25	chr20-10175208-10176178
HMGA2	SNAP25	chr20-10175208-10176178
NRL	SNAP25	chr20-10175208-10176178
OTX2	SNAP25	chr20-10175208-10176178
NR2E3	SNAP25	chr20-10175208-10176178
NFIC	SNAP25	chr20-10175208-10176178
HIF3A	SNAP25	chr20-10175208-10176178
CRX	SNAP25	chr20-10175208-10176178
ZNF83	SNAP25	chr20-10175208-10176178
THRB	SNAP25	chr20-10179367-10180234
CREB5	SNAP25	chr20-10179367-10180234
RXRG	SNAP25	chr20-10208845-10209802
MEF2C	SNAP25	chr20-10208845-10209802
RREB1	SNAP25	chr20-10208845-10209802
PTF1A	SNAP25	chr20-10208845-10209802
HMGA2	SNAP25	chr20-10208845-10209802
NR2E3	SNAP25	chr20-10208845-10209802
NFIC	SNAP25	chr20-10208845-10209802
HIF3A	SNAP25	chr20-10208845-10209802
CRX	SNAP25	chr20-10208845-10209802
LHX4	SNAP25	chr20-10216399-10218829
KLF7	SNAP25	chr20-10216399-10218829
PRDM8	SNAP25	chr20-10216399-10218829
NR3C2	SNAP25	chr20-10216399-10218829
MEF2C	SNAP25	chr20-10216399-10218829
RREB1	SNAP25	chr20-10216399-10218829
PRDM13	SNAP25	chr20-10216399-10218829
JAZF1	SNAP25	chr20-10216399-10218829
PBX3	SNAP25	chr20-10216399-10218829
PTF1A	SNAP25	chr20-10216399-10218829
HMGA2	SNAP25	chr20-10216399-10218829
NRL	SNAP25	chr20-10216399-10218829
ZNF83	SNAP25	chr20-10216399-10218829
HIF3A	SNAP25	chr20-10218978-10219065
RXRG	SNAP25	chr20-10219214-10220464
THRB	SNAP25	chr20-10219214-10220464
PRDM1	SNAP25	chr20-10219214-10220464
MEIS2	SNAP25	chr20-10219214-10220464
NR2E3	SNAP25	chr20-10219214-10220464
ONECUT2	SNAP25	chr20-10219214-10220464
ZNF536	SNAP25	chr20-10219214-10220464
PPARA	SNAP25	chr20-10219214-10220464
LHX4	SNAP25	chr20-10220959-10221848
NEUROD1	SNAP25	chr20-10220959-10221848
THRB	SNAP25	chr20-10220959-10221848
MEF2C	SNAP25	chr20-10220959-10221848
PRDM13	SNAP25	chr20-10220959-10221848
PTF1A	SNAP25	chr20-10220959-10221848
HMGA2	SNAP25	chr20-10220959-10221848
RAX2	SNAP25	chr20-10220959-10221848
RXRG	SNAP25	chr20-10224010-10226203
LHX4	SNAP25	chr20-10224010-10226203
TCF7L1	SNAP25	chr20-10224010-10226203
NEUROD1	SNAP25	chr20-10224010-10226203
THRB	SNAP25	chr20-10224010-10226203
PRDM8	SNAP25	chr20-10224010-10226203
BACH2	SNAP25	chr20-10224010-10226203
CREB5	SNAP25	chr20-10224010-10226203
ST18	SNAP25	chr20-10224010-10226203
PTF1A	SNAP25	chr20-10224010-10226203
ATOH7	SNAP25	chr20-10224010-10226203
HMGA2	SNAP25	chr20-10224010-10226203
NRL	SNAP25	chr20-10224010-10226203
OTX2	SNAP25	chr20-10224010-10226203
NR2E3	SNAP25	chr20-10224010-10226203
ONECUT2	SNAP25	chr20-10224010-10226203
NFIX	SNAP25	chr20-10224010-10226203
HIF3A	SNAP25	chr20-10224010-10226203
CRX	SNAP25	chr20-10224010-10226203
ZNF83	SNAP25	chr20-10224010-10226203
PPARA	SNAP25	chr20-10224010-10226203
MEF2C	SNAP25	chr20-10232841-10233746
HMGA2	SNAP25	chr20-10232841-10233746
NRL	SNAP25	chr20-10232841-10233746
MEIS2	SNAP25	chr20-10232841-10233746
NR2E3	SNAP25	chr20-10232841-10233746
LHX4	SNAP25	chr20-10236305-10237472
TCF7L1	SNAP25	chr20-10236305-10237472
PRDM8	SNAP25	chr20-10236305-10237472
MEF2C	SNAP25	chr20-10236305-10237472
PRDM13	SNAP25	chr20-10236305-10237472
JAZF1	SNAP25	chr20-10236305-10237472
ST18	SNAP25	chr20-10236305-10237472
PTF1A	SNAP25	chr20-10236305-10237472
SOX6	SNAP25	chr20-10236305-10237472
OTX2	SNAP25	chr20-10236305-10237472
MEIS2	SNAP25	chr20-10236305-10237472
NR2E3	SNAP25	chr20-10236305-10237472
NFIC	SNAP25	chr20-10236305-10237472
NFIX	SNAP25	chr20-10236305-10237472
ZNF536	SNAP25	chr20-10236305-10237472
CRX	SNAP25	chr20-10236305-10237472
RXRG	SNAP25	chr20-10239583-10240904
THRB	SNAP25	chr20-10239583-10240904
CREB5	SNAP25	chr20-10239583-10240904
NFIB	SNAP25	chr20-10239583-10240904
PTF1A	SNAP25	chr20-10239583-10240904
HMGA2	SNAP25	chr20-10239583-10240904
MEIS2	SNAP25	chr20-10239583-10240904
NR2E3	SNAP25	chr20-10239583-10240904
NFIC	SNAP25	chr20-10239583-10240904
PRDM8	SNAP25	chr20-10241834-10242751
EBF1	SNAP25	chr20-10241834-10242751
PRDM13	SNAP25	chr20-10241834-10242751
PRDM1	SNAP25	chr20-10241834-10242751
GLIS3	SNAP25	chr20-10241834-10242751
PTF1A	SNAP25	chr20-10241834-10242751
MEIS2	SNAP25	chr20-10241834-10242751
ZNF83	SNAP25	chr20-10241834-10242751
MEF2C	SNAP25	chr20-10247272-10248287
BACH2	SNAP25	chr20-10247272-10248287
ST18	SNAP25	chr20-10247272-10248287
HMGA2	SNAP25	chr20-10247272-10248287
NRL	SNAP25	chr20-10247272-10248287
RXRG	SNAP25	chr20-10253494-10254447
NEUROD1	SNAP25	chr20-10253494-10254447
PRDM8	SNAP25	chr20-10253494-10254447
BACH2	SNAP25	chr20-10253494-10254447
PRDM13	SNAP25	chr20-10253494-10254447
JAZF1	SNAP25	chr20-10253494-10254447
PBX3	SNAP25	chr20-10253494-10254447
NR2E3	SNAP25	chr20-10253494-10254447
NFIX	SNAP25	chr20-10253494-10254447
PPARA	SNAP25	chr20-10253494-10254447
LHX4	SNAP25	chr20-10255557-10256489
NEUROD1	SNAP25	chr20-10255557-10256489
PRDM8	SNAP25	chr20-10255557-10256489
MEF2C	SNAP25	chr20-10255557-10256489
PRDM1	SNAP25	chr20-10255557-10256489
JAZF1	SNAP25	chr20-10255557-10256489
PTF1A	SNAP25	chr20-10255557-10256489
HMGA2	SNAP25	chr20-10255557-10256489
MEIS2	SNAP25	chr20-10255557-10256489
ONECUT2	SNAP25	chr20-10255557-10256489
NEUROD1	SNAP25	chr20-10259036-10260036
MEF2C	SNAP25	chr20-10259036-10260036
JAZF1	SNAP25	chr20-10259036-10260036
ST18	SNAP25	chr20-10259036-10260036
GLIS3	SNAP25	chr20-10259036-10260036
PTF1A	SNAP25	chr20-10259036-10260036
HMGA2	SNAP25	chr20-10259036-10260036
ZNF536	SNAP25	chr20-10259036-10260036
CRX	SNAP25	chr20-10259036-10260036
ZNF83	SNAP25	chr20-10259036-10260036
KLF7	SNAP25	chr20-10262537-10263437
NR3C2	SNAP25	chr20-10262537-10263437
MEF2C	SNAP25	chr20-10262537-10263437
EBF1	SNAP25	chr20-10262537-10263437
RREB1	SNAP25	chr20-10262537-10263437
JAZF1	SNAP25	chr20-10262537-10263437
HMGA2	SNAP25	chr20-10262537-10263437
MEIS2	SNAP25	chr20-10262537-10263437
ZNF83	SNAP25	chr20-10262537-10263437
RXRG	SNAP25	chr20-10268266-10269234
NEUROD1	SNAP25	chr20-10268266-10269234
THRB	SNAP25	chr20-10268266-10269234
JAZF1	SNAP25	chr20-10268266-10269234
ATOH7	SNAP25	chr20-10268266-10269234
SOX6	SNAP25	chr20-10268266-10269234
MEIS2	SNAP25	chr20-10268266-10269234
NR2E3	SNAP25	chr20-10268266-10269234
NFIX	SNAP25	chr20-10268266-10269234
ZNF536	SNAP25	chr20-10268266-10269234
HIF3A	SNAP25	chr20-10268266-10269234
LHX4	SNAP25	chr20-10270393-10272346
KLF7	SNAP25	chr20-10270393-10272346
THRB	SNAP25	chr20-10270393-10272346
MEF2C	SNAP25	chr20-10270393-10272346
JAZF1	SNAP25	chr20-10270393-10272346
GLIS3	SNAP25	chr20-10270393-10272346
PTF1A	SNAP25	chr20-10270393-10272346
HMGA2	SNAP25	chr20-10270393-10272346
NRL	SNAP25	chr20-10270393-10272346
NR2E3	SNAP25	chr20-10270393-10272346
NFIC	SNAP25	chr20-10270393-10272346
RAX2	SNAP25	chr20-10270393-10272346
ZNF83	SNAP25	chr20-10270393-10272346
TCF7L1	JAG1	chr20-10540244-10541215
HMGA2	JAG1	chr20-10540244-10541215
NR2E3	JAG1	chr20-10540244-10541215
HIF3A	JAG1	chr20-10540244-10541215
ZBTB38	JAG1	chr20-10541947-10542823
GLIS3	JAG1	chr20-10544749-10545445
HMGA2	JAG1	chr20-10544749-10545445
[truncated: 488,613+ more rows]

## Sheet: AC GRN
tf	target	region
SOX11	PLCB1	chr20-7976793-7977347
SOX2	PLCB1	chr20-7976793-7977347
TOX	PLCB1	chr20-7976793-7977347
ZFPM2	PLCB1	chr20-7976793-7977347
NEUROD4	PLCB1	chr20-7976793-7977347
SOX11	PLCB1	chr20-7982622-7983276
SOX2	PLCB1	chr20-7982622-7983276
FOXP2	PLCB1	chr20-7982622-7983276
TOX	PLCB1	chr20-7982622-7983276
POU6F2	PLCB1	chr20-7985645-7986573
TOX	PLCB1	chr20-7985645-7986573
TCF7L2	PLCB1	chr20-7985645-7986573
NEUROD4	PLCB1	chr20-7985645-7986573
MEIS2	PLCB1	chr20-7985645-7986573
EBF1	PLCB1	chr20-7996072-7996828
PRDM13	PLCB1	chr20-7996072-7996828
ZFPM2	PLCB1	chr20-7996072-7996828
PTF1A	PLCB1	chr20-7996072-7996828
TCF4	PLCB1	chr20-7996072-7996828
SOX11	PLCB1	chr20-7999079-7999731
TOX	PLCB1	chr20-7999079-7999731
PTF1A	PLCB1	chr20-7999079-7999731
TCF7L2	PLCB1	chr20-7999079-7999731
ONECUT1	PLCB1	chr20-7999079-7999731
SOX11	PLCB1	chr20-8004819-8005757
KLF7	PLCB1	chr20-8004819-8005757
PRDM13	PLCB1	chr20-8004819-8005757
MYB	PLCB1	chr20-8004819-8005757
POU6F2	PLCB1	chr20-8004819-8005757
PTF1A	PLCB1	chr20-8004819-8005757
SOX11	PLCB1	chr20-8012440-8013369
SOX2	PLCB1	chr20-8012440-8013369
PRDM13	PLCB1	chr20-8012440-8013369
TOX	PLCB1	chr20-8012440-8013369
ZFPM2	PLCB1	chr20-8012440-8013369
PTF1A	PLCB1	chr20-8012440-8013369
NEUROD4	PLCB1	chr20-8012440-8013369
DACH1	PLCB1	chr20-8012440-8013369
MEIS2	PLCB1	chr20-8012440-8013369
SOX11	PLCB1	chr20-8018107-8018792
KLF7	PLCB1	chr20-8018107-8018792
PRDM13	PLCB1	chr20-8018107-8018792
TOX	PLCB1	chr20-8018107-8018792
ZFPM2	PLCB1	chr20-8018107-8018792
HEYL	PLCB1	chr20-8019830-8020810
FOXP2	PLCB1	chr20-8019830-8020810
PTF1A	PLCB1	chr20-8019830-8020810
ONECUT1	PLCB1	chr20-8019830-8020810
TCF4	PLCB1	chr20-8019830-8020810
SOX11	PLCB1	chr20-8027167-8028108
SOX2	PLCB1	chr20-8027167-8028108
POU6F2	PLCB1	chr20-8027167-8028108
DACH1	PLCB1	chr20-8027167-8028108
ZNF536	PLCB1	chr20-8027167-8028108
PRDM13	PLCB1	chr20-8037983-8039061
FOXP2	PLCB1	chr20-8037983-8039061
NEUROD4	PLCB1	chr20-8037983-8039061
MEIS2	PLCB1	chr20-8037983-8039061
ONECUT1	PLCB1	chr20-8037983-8039061
SOX11	PLCB1	chr20-8043508-8044435
PRDM13	PLCB1	chr20-8043508-8044435
TOX	PLCB1	chr20-8043508-8044435
ZFPM2	PLCB1	chr20-8043508-8044435
TCF7L2	PLCB1	chr20-8043508-8044435
SOX11	PLCB1	chr20-8054772-8055720
TOX	PLCB1	chr20-8054772-8055720
ZFPM2	PLCB1	chr20-8054772-8055720
PTF1A	PLCB1	chr20-8054772-8055720
NEUROD4	PLCB1	chr20-8054772-8055720
MEIS2	PLCB1	chr20-8054772-8055720
SOX11	PLCB1	chr20-8065170-8066028
SOX2	PLCB1	chr20-8065170-8066028
TOX	PLCB1	chr20-8065170-8066028
ZFPM2	PLCB1	chr20-8065170-8066028
ONECUT1	PLCB1	chr20-8065170-8066028
ONECUT2	PLCB1	chr20-8065170-8066028
ONECUT3	PLCB1	chr20-8065170-8066028
PRDM13	PLCB1	chr20-8082769-8083678
MYB	PLCB1	chr20-8082769-8083678
PTF1A	PLCB1	chr20-8082769-8083678
MEIS2	PLCB1	chr20-8082769-8083678
TCF4	PLCB1	chr20-8082769-8083678
SOX11	PLCB1	chr20-8092732-8093599
POU6F2	PLCB1	chr20-8092732-8093599
TOX	PLCB1	chr20-8092732-8093599
TCF7L2	PLCB1	chr20-8092732-8093599
SOX11	PLCB1	chr20-8115957-8117494
TFAP2A	PLCB1	chr20-8115957-8117494
MYB	PLCB1	chr20-8115957-8117494
ST18	PLCB1	chr20-8115957-8117494
TOX	PLCB1	chr20-8115957-8117494
ZFPM2	PLCB1	chr20-8115957-8117494
TCF7L2	PLCB1	chr20-8115957-8117494
NEUROD4	PLCB1	chr20-8115957-8117494
EBF1	PLCB1	chr20-8131552-8132137
KLF7	PLCB1	chr20-8132751-8133305
TFAP2A	PLCB1	chr20-8132751-8133305
TFAP2B	PLCB1	chr20-8132751-8133305
PRDM13	PLCB1	chr20-8132751-8133305
ZFPM2	PLCB1	chr20-8144461-8145365
PTF1A	PLCB1	chr20-8144461-8145365
ONECUT2	PLCB1	chr20-8144461-8145365
ONECUT3	PLCB1	chr20-8144461-8145365
ZNF536	PLCB1	chr20-8144461-8145365
SOX11	PLCB1	chr20-8151356-8152265
SOX2	PLCB1	chr20-8151356-8152265
FOXP2	PLCB1	chr20-8151356-8152265
ST18	PLCB1	chr20-8151356-8152265
TOX	PLCB1	chr20-8151356-8152265
ONECUT3	PLCB1	chr20-8151356-8152265
PRDM13	PLCB1	chr20-8204288-8204371
SOX2	PLCB1	chr20-8209395-8210322
TOX	PLCB1	chr20-8209395-8210322
ONECUT1	PLCB1	chr20-8209395-8210322
SOX11	PLCB1	chr20-8210827-8211510
KLF7	PLCB1	chr20-8210827-8211510
EBF1	PLCB1	chr20-8210827-8211510
TFAP2A	PLCB1	chr20-8210827-8211510
TOX	PLCB1	chr20-8210827-8211510
MEIS2	PLCB1	chr20-8210827-8211510
SOX11	PLCB1	chr20-8213799-8214695
TFAP2A	PLCB1	chr20-8213799-8214695
PRDM13	PLCB1	chr20-8213799-8214695
FOXP2	PLCB1	chr20-8213799-8214695
TOX	PLCB1	chr20-8213799-8214695
ZFPM2	PLCB1	chr20-8213799-8214695
PRDM13	PLCB1	chr20-8297514-8298352
ONECUT1	PLCB1	chr20-8297514-8298352
ZNF536	PLCB1	chr20-8297514-8298352
SOX11	PLCB1	chr20-8304030-8305117
SOX2	PLCB1	chr20-8304030-8305117
TFAP2A	PLCB1	chr20-8304030-8305117
TOX	PLCB1	chr20-8304030-8305117
PTF1A	PLCB1	chr20-8304030-8305117
TCF7L2	PLCB1	chr20-8304030-8305117
DACH1	PLCB1	chr20-8304030-8305117
MEIS2	PLCB1	chr20-8304030-8305117
ZFPM2	PLCB1	chr20-8305374-8305673
TCF4	PLCB1	chr20-8305374-8305673
PTF1A	PLCB1	chr20-8305934-8306365
NEUROD4	PLCB1	chr20-8305934-8306365
ZNF536	PLCB1	chr20-8305934-8306365
HEYL	PLCB1	chr20-8306748-8307749
SOX11	PLCB1	chr20-8306748-8307749
SOX2	PLCB1	chr20-8306748-8307749
PRDM13	PLCB1	chr20-8306748-8307749
MYB	PLCB1	chr20-8306748-8307749
POU6F2	PLCB1	chr20-8306748-8307749
TOX	PLCB1	chr20-8306748-8307749
PTF1A	PLCB1	chr20-8306748-8307749
TCF7L2	PLCB1	chr20-8306748-8307749
MEIS2	PLCB1	chr20-8306748-8307749
ONECUT1	PLCB1	chr20-8306748-8307749
SOX11	PLCB1	chr20-8309246-8310162
ZFPM2	PLCB1	chr20-8309246-8310162
MEIS2	PLCB1	chr20-8309246-8310162
ZNF536	PLCB1	chr20-8309246-8310162
SOX11	PLCB1	chr20-8330976-8331879
PRDM13	PLCB1	chr20-8330976-8331879
TOX	PLCB1	chr20-8330976-8331879
PROX1	PLCB1	chr20-8360840-8361895
SOX11	PLCB1	chr20-8360840-8361895
SOX2	PLCB1	chr20-8360840-8361895
DACH1	PLCB1	chr20-8372881-8373163
EBF1	PLCB1	chr20-8385010-8385971
TFAP2B	PLCB1	chr20-8385010-8385971
PRDM13	PLCB1	chr20-8385010-8385971
ZFPM2	PLCB1	chr20-8385010-8385971
PTF1A	PLCB1	chr20-8385010-8385971
DACH1	PLCB1	chr20-8385010-8385971
ZNF536	PLCB1	chr20-8385010-8385971
KLF7	PLCB1	chr20-8389134-8390147
PTF1A	PLCB1	chr20-8389134-8390147
EBF1	PLCB1	chr20-8404930-8405856
PTF1A	PLCB1	chr20-8404930-8405856
ONECUT3	PLCB1	chr20-8404930-8405856
PROX1	PLCB1	chr20-8414587-8415505
TFAP2A	PLCB1	chr20-8414587-8415505
TFAP2B	PLCB1	chr20-8414587-8415505
POU6F2	PLCB1	chr20-8414587-8415505
ST18	PLCB1	chr20-8414587-8415505
TOX	PLCB1	chr20-8414587-8415505
ZFPM2	PLCB1	chr20-8414587-8415505
PTF1A	PLCB1	chr20-8414587-8415505
TCF7L2	PLCB1	chr20-8414587-8415505
TCF4	PLCB1	chr20-8414587-8415505
TOX	PLCB1	chr20-8432510-8433297
PTF1A	PLCB1	chr20-8432510-8433297
TCF7L2	PLCB1	chr20-8432510-8433297
SOX11	PLCB1	chr20-8469860-8470726
PRDM13	PLCB1	chr20-8469860-8470726
FOXP2	PLCB1	chr20-8469860-8470726
TOX	PLCB1	chr20-8469860-8470726
TCF7L2	PLCB1	chr20-8469860-8470726
PROX1	PLCB1	chr20-8473244-8474235
HES6	PLCB1	chr20-8473244-8474235
TFAP2A	PLCB1	chr20-8473244-8474235
TFAP2B	PLCB1	chr20-8473244-8474235
TOX	PLCB1	chr20-8473244-8474235
TCF7L2	PLCB1	chr20-8473244-8474235
ONECUT1	PLCB1	chr20-8473244-8474235
ONECUT2	PLCB1	chr20-8473244-8474235
ONECUT3	PLCB1	chr20-8473244-8474235
SOX11	PLCB1	chr20-8475623-8476677
TFAP2A	PLCB1	chr20-8475623-8476677
POU6F2	PLCB1	chr20-8475623-8476677
TOX	PLCB1	chr20-8475623-8476677
PTF1A	PLCB1	chr20-8475623-8476677
SOX11	PLCB1	chr20-8485195-8486163
TFAP2A	PLCB1	chr20-8485195-8486163
TFAP2B	PLCB1	chr20-8485195-8486163
FOXP2	PLCB1	chr20-8485195-8486163
ONECUT2	PLCB1	chr20-8485195-8486163
ONECUT3	PLCB1	chr20-8485195-8486163
SOX11	PLCB1	chr20-8518699-8519656
EBF1	PLCB1	chr20-8518699-8519656
PRDM13	PLCB1	chr20-8518699-8519656
FOXP2	PLCB1	chr20-8518699-8519656
TOX	PLCB1	chr20-8518699-8519656
SOX11	PLCB1	chr20-8523322-8524238
KLF7	PLCB1	chr20-8523322-8524238
POU6F2	PLCB1	chr20-8523322-8524238
TOX	PLCB1	chr20-8523322-8524238
PTF1A	PLCB1	chr20-8523322-8524238
ONECUT1	PLCB1	chr20-8523322-8524238
ONECUT3	PLCB1	chr20-8523322-8524238
SOX11	PLCB1	chr20-8524300-8525168
TFAP2A	PLCB1	chr20-8524300-8525168
TFAP2B	PLCB1	chr20-8524300-8525168
PRDM13	PLCB1	chr20-8524300-8525168
TOX	PLCB1	chr20-8524300-8525168
PTF1A	PLCB1	chr20-8524300-8525168
DACH1	PLCB1	chr20-8524300-8525168
MEIS2	PLCB1	chr20-8524300-8525168
TCF4	PLCB1	chr20-8524300-8525168
TOX	PLCB1	chr20-8526238-8527274
TCF7L2	PLCB1	chr20-8526238-8527274
SOX11	PLCB1	chr20-8541875-8542762
TFAP2A	PLCB1	chr20-8541875-8542762
TFAP2B	PLCB1	chr20-8541875-8542762
TOX	PLCB1	chr20-8541875-8542762
ZFPM2	PLCB1	chr20-8541875-8542762
TCF7L2	PLCB1	chr20-8541875-8542762
DACH1	PLCB1	chr20-8541875-8542762
SOX11	PLCB1	chr20-8572158-8573128
SOX2	PLCB1	chr20-8572158-8573128
PRDM13	PLCB1	chr20-8572158-8573128
TOX	PLCB1	chr20-8572158-8573128
ZFPM2	PLCB1	chr20-8572158-8573128
ONECUT2	PLCB1	chr20-8572158-8573128
ONECUT3	PLCB1	chr20-8572158-8573128
ZNF536	PLCB1	chr20-8572158-8573128
POU6F2	PLCB1	chr20-8585841-8586203
TOX	PLCB1	chr20-8602128-8602988
ZFPM2	PLCB1	chr20-8602128-8602988
HES6	PLCB1	chr20-8632405-8633339
TFAP2A	PLCB1	chr20-8632405-8633339
TFAP2B	PLCB1	chr20-8632405-8633339
PRDM13	PLCB1	chr20-8632405-8633339
FOXP2	PLCB1	chr20-8632405-8633339
PTF1A	PLCB1	chr20-8632405-8633339
NEUROD4	PLCB1	chr20-8632405-8633339
ONECUT1	PLCB1	chr20-8632405-8633339
TCF4	PLCB1	chr20-8632405-8633339
ONECUT2	PLCB1	chr20-8632405-8633339
ONECUT3	PLCB1	chr20-8632405-8633339
EBF1	PLCB1	chr20-8661170-8662063
ST18	PLCB1	chr20-8661170-8662063
MEIS2	PLCB1	chr20-8661170-8662063
ONECUT1	PLCB1	chr20-8661170-8662063
TCF4	PLCB1	chr20-8661170-8662063
POU6F2	PLCB1	chr20-8662624-8663340
ST18	PLCB1	chr20-8662624-8663340
ONECUT1	PLCB1	chr20-8662624-8663340
ONECUT2	PLCB1	chr20-8662624-8663340
ONECUT3	PLCB1	chr20-8662624-8663340
TOX	PLCB1	chr20-8663349-8663785
TCF7L2	PLCB1	chr20-8663349-8663785
ST18	PLCB1	chr20-8670695-8671485
ZFPM2	PLCB1	chr20-8670695-8671485
NEUROD4	PLCB1	chr20-8670695-8671485
EBF1	PLCB1	chr20-8709546-8710421
ZFPM2	PLCB1	chr20-8709546-8710421
TCF4	PLCB1	chr20-8709546-8710421
EBF1	PLCB1	chr20-8720803-8721679
ONECUT1	PLCB1	chr20-8720803-8721679
ONECUT2	PLCB1	chr20-8720803-8721679
ONECUT3	PLCB1	chr20-8720803-8721679
ONECUT1	PLCB1	chr20-8722099-8722353
ONECUT2	PLCB1	chr20-8722099-8722353
ONECUT3	PLCB1	chr20-8722099-8722353
SOX11	PLCB1	chr20-8722422-8723023
TFAP2B	PLCB1	chr20-8722422-8723023
PRDM13	PLCB1	chr20-8722422-8723023
ST18	PLCB1	chr20-8722422-8723023
ZFPM2	PLCB1	chr20-8722422-8723023
TCF4	PLCB1	chr20-8722422-8723023
ZNF536	PLCB1	chr20-8722422-8723023
HEYL	PLCB1	chr20-8723801-8724655
HES6	PLCB1	chr20-8723801-8724655
PRDM13	PLCB1	chr20-8723801-8724655
FOXP2	PLCB1	chr20-8723801-8724655
ST18	PLCB1	chr20-8723801-8724655
ZFPM2	PLCB1	chr20-8723801-8724655
SOX11	PLCB1	chr20-8753317-8754346
EBF1	PLCB1	chr20-8753317-8754346
PRDM13	PLCB1	chr20-8753317-8754346
TOX	PLCB1	chr20-8753317-8754346
TCF7L2	PLCB1	chr20-8753317-8754346
NEUROD4	PLCB1	chr20-8753317-8754346
MEIS2	PLCB1	chr20-8753317-8754346
PRDM13	PLCB1	chr20-8759385-8760321
POU6F2	PLCB1	chr20-8759385-8760321
ST18	PLCB1	chr20-8759385-8760321
DACH1	PLCB1	chr20-8759385-8760321
TCF4	PLCB1	chr20-8759385-8760321
SOX11	PLCB1	chr20-8790262-8791117
SOX2	PLCB1	chr20-8790262-8791117
EBF1	PLCB1	chr20-8790262-8791117
MYB	PLCB1	chr20-8790262-8791117
ZFPM2	PLCB1	chr20-8790262-8791117
MEIS2	PLCB1	chr20-8790262-8791117
ONECUT1	PLCB1	chr20-8790262-8791117
TFAP2A	PLCB1	chr20-8823822-8824755
TFAP2B	PLCB1	chr20-8823822-8824755
ZFPM2	PLCB1	chr20-8823822-8824755
PTF1A	PLCB1	chr20-8823822-8824755
NEUROD4	PLCB1	chr20-8823822-8824755
MEIS2	PLCB1	chr20-8823822-8824755
PROX1	PLCB1	chr20-8849768-8850714
TOX	PLCB1	chr20-8849768-8850714
ZFPM2	PLCB1	chr20-8849768-8850714
TCF7L2	PLCB1	chr20-8849768-8850714
MEIS2	PLCB1	chr20-8849768-8850714
PROX1	PLCB1	chr20-8853493-8854876
SOX11	PLCB1	chr20-8853493-8854876
TFAP2A	PLCB1	chr20-8853493-8854876
TFAP2B	PLCB1	chr20-8853493-8854876
PRDM13	PLCB1	chr20-8853493-8854876
FOXP2	PLCB1	chr20-8853493-8854876
ST18	PLCB1	chr20-8853493-8854876
TOX	PLCB1	chr20-8853493-8854876
ZFPM2	PLCB1	chr20-8853493-8854876
PTF1A	PLCB1	chr20-8853493-8854876
TCF7L2	PLCB1	chr20-8853493-8854876
ZNF536	PLCB1	chr20-8853493-8854876
EBF1	PLCB1	chr20-8858031-8859051
TFAP2A	PLCB1	chr20-8858031-8859051
FOXP2	PLCB1	chr20-8858031-8859051
ZFPM2	PLCB1	chr20-8858031-8859051
ZFPM2	PLCB1	chr20-8861912-8862866
MEIS2	PLCB1	chr20-8861912-8862866
ONECUT1	PLCB1	chr20-8861912-8862866
ONECUT2	PLCB1	chr20-8861912-8862866
ONECUT3	PLCB1	chr20-8861912-8862866
TFAP2A	PLCB1	chr20-8866786-8867913
TFAP2B	PLCB1	chr20-8866786-8867913
POU6F2	PLCB1	chr20-8866786-8867913
ZFPM2	PLCB1	chr20-8866786-8867913
MEIS2	PLCB1	chr20-8866786-8867913
ONECUT1	PLCB1	chr20-8866786-8867913
ONECUT2	PLCB1	chr20-8866786-8867913
ONECUT3	PLCB1	chr20-8866786-8867913
FOXP2	PLCB1	chr20-8888943-8889834
TOX	PLCB1	chr20-8888943-8889834
ZFPM2	PLCB1	chr20-8888943-8889834
PTF1A	PLCB1	chr20-8888943-8889834
TCF7L2	PLCB1	chr20-8888943-8889834
NEUROD4	PLCB1	chr20-8888943-8889834
PRDM13	PLCB1	chr20-8912480-8913332
ST18	PLCB1	chr20-8912480-8913332
ZFPM2	PLCB1	chr20-8912480-8913332
NEUROD4	PLCB1	chr20-8912480-8913332
FOXP2	PLCB1	chr20-8941219-8942095
TOX	PLCB1	chr20-8941219-8942095
TCF7L2	PLCB1	chr20-8941219-8942095
TCF4	PLCB1	chr20-8941219-8942095
SOX2	PLCB1	chr20-8946223-8947161
ZFPM2	PLCB1	chr20-8946223-8947161
PTF1A	PLCB1	chr20-8946223-8947161
ZNF536	PLCB1	chr20-8946223-8947161
SOX11	PLCB1	chr20-8949719-8950709
TFAP2A	PLCB1	chr20-8949719-8950709
TFAP2B	PLCB1	chr20-8949719-8950709
TOX	PLCB1	chr20-8949719-8950709
PTF1A	PLCB1	chr20-8949719-8950709
TCF7L2	PLCB1	chr20-8949719-8950709
NEUROD4	PLCB1	chr20-8949719-8950709
HEYL	PLCB1	chr20-8964780-8965089
SOX11	PLCB1	chr20-8964780-8965089
HES6	PLCB1	chr20-8964780-8965089
FOXP2	PLCB1	chr20-8964780-8965089
TOX	PLCB1	chr20-8964780-8965089
ZFPM2	PLCB1	chr20-8964780-8965089
EBF1	PLCB1	chr20-8965436-8965834
TCF7L2	PLCB1	chr20-8965436-8965834
NEUROD4	PLCB1	chr20-8965436-8965834
ONECUT1	PLCB1	chr20-8965436-8965834
EBF1	PLCB4	chr20-8990764-8991728
TFAP2A	PLCB4	chr20-8990764-8991728
TFAP2B	PLCB4	chr20-8990764-8991728
PRDM13	PLCB4	chr20-8990764-8991728
TOX	PLCB4	chr20-8990764-8991728
EBF3	PLCB4	chr20-8990764-8991728
NFIA	PLCB4	chr20-8996758-8998719
SOX11	PLCB4	chr20-8996758-8998719
TFAP2A	PLCB4	chr20-8996758-8998719
TFAP2B	PLCB4	chr20-8996758-8998719
PRDM13	PLCB4	chr20-8996758-8998719
TOX	PLCB4	chr20-8996758-8998719
NFIB	PLCB4	chr20-8996758-8998719
EBF3	PLCB4	chr20-8996758-8998719
NEUROD4	PLCB4	chr20-8996758-8998719
SOX11	PLCB4	chr20-9028046-9028951
EBF1	PLCB4	chr20-9028046-9028951
TOX	PLCB4	chr20-9028046-9028951
SOX11	PLCB4	chr20-9050249-9051188
ST18	PLCB4	chr20-9050249-9051188
TOX	PLCB4	chr20-9050249-9051188
NFIA	PLCB4	chr20-9055453-9056322
SOX11	PLCB4	chr20-9055453-9056322
HES5	PLCB4	chr20-9066189-9068762
EBF1	PLCB4	chr20-9066189-9068762
TFAP2A	PLCB4	chr20-9066189-9068762
TFAP2B	PLCB4	chr20-9066189-9068762
PRDM13	PLCB4	chr20-9066189-9068762
ST18	PLCB4	chr20-9066189-9068762
TOX	PLCB4	chr20-9066189-9068762
EBF3	PLCB4	chr20-9066189-9068762
HIF1A	PLCB4	chr20-9066189-9068762
TCF4	PLCB4	chr20-9066189-9068762
NFIA	PLCB4	chr20-9069207-9069820
NFIB	PLCB4	chr20-9069207-9069820
HES6	PLCB4	chr20-9078950-9079849
NEUROD4	PLCB4	chr20-9078950-9079849
TCF4	PLCB4	chr20-9078950-9079849
SOX11	PLCB4	chr20-9094394-9095380
PRDM13	PLCB4	chr20-9094394-9095380
ST18	PLCB4	chr20-9094394-9095380
HIF1A	PLCB4	chr20-9094394-9095380
TFAP2A	PLCB4	chr20-9100549-9101437
PRDM13	PLCB4	chr20-9100549-9101437
EBF3	PLCB4	chr20-9100549-9101437
NEUROD4	PLCB4	chr20-9100549-9101437
NFIA	PLCB4	chr20-9107745-9108828
PROX1	PLCB4	chr20-9107745-9108828
HIF1A	PLCB4	chr20-9107745-9108828
TCF4	PLCB4	chr20-9107745-9108828
TFAP2A	PLCB4	chr20-9119553-9120512
TFAP2B	PLCB4	chr20-9119553-9120512
TOX	PLCB4	chr20-9119553-9120512
NEUROD4	PLCB4	chr20-9119553-9120512
SOX11	PLCB4	chr20-9185266-9186202
PRDM13	PLCB4	chr20-9185266-9186202
SOX11	PLCB4	chr20-9220681-9221490
PRDM13	PLCB4	chr20-9220681-9221490
SOX11	PLCB4	chr20-9236188-9237089
TOX	PLCB4	chr20-9236188-9237089
PRDM13	PLCB4	chr20-9269066-9269979
SOX11	PLCB4	chr20-9277036-9278033
PRDM13	PLCB4	chr20-9277036-9278033
TOX	PLCB4	chr20-9277036-9278033
SOX11	PLCB4	chr20-9301408-9302325
PRDM13	PLCB4	chr20-9301408-9302325
NFIB	PLCB4	chr20-9301408-9302325
LHX9	PLCB4	chr20-9318721-9319501
SOX11	PLCB4	chr20-9318721-9319501
SOX11	PLCB4	chr20-9324244-9325069
EBF1	PLCB4	chr20-9324244-9325069
TFAP2A	PLCB4	chr20-9324244-9325069
NFIB	PLCB4	chr20-9324244-9325069
EBF3	PLCB4	chr20-9324244-9325069
SOX11	PLCB4	chr20-9325360-9326387
TOX	PLCB4	chr20-9325360-9326387
SOX11	PLCB4	chr20-9331766-9332807
EBF1	PLCB4	chr20-9331766-9332807
EBF3	PLCB4	chr20-9331766-9332807
NFIB	PLCB4	chr20-9344353-9345307
EBF1	PLCB4	chr20-9352972-9353871
TOX	PLCB4	chr20-9352972-9353871
EBF3	PLCB4	chr20-9352972-9353871
SOX11	PLCB4	chr20-9359390-9360399
TFAP2A	PLCB4	chr20-9359390-9360399
TFAP2B	PLCB4	chr20-9359390-9360399
PRDM13	PLCB4	chr20-9359390-9360399
TOX	PLCB4	chr20-9359390-9360399
TCF4	PLCB4	chr20-9359390-9360399
SOX11	PLCB4	chr20-9361601-9362530
EBF3	PLCB4	chr20-9361601-9362530
NEUROD4	PLCB4	chr20-9361601-9362530
TFAP2A	PLCB4	chr20-9371734-9372302
TFAP2B	PLCB4	chr20-9371734-9372302
TCF4	PLCB4	chr20-9372404-9372654
EBF1	PLCB4	chr20-9392897-9393587
TFAP2A	PLCB4	chr20-9392897-9393587
PRDM13	PLCB4	chr20-9392897-9393587
EBF3	PLCB4	chr20-9392897-9393587
EBF3	PLCB4	chr20-9397650-9398661
HIF1A	PLCB4	chr20-9407755-9407916
PROX1	PLCB4	chr20-9408059-9408632
TFAP2B	PLCB4	chr20-9408059-9408632
NEUROD4	PLCB4	chr20-9408059-9408632
SOX11	PLCB4	chr20-9408824-9409056
TOX	PLCB4	chr20-9408824-9409056
NEUROD4	PLCB4	chr20-9409182-9409727
EBF1	PLCB4	chr20-9430338-9431227
NEUROD4	PLCB4	chr20-9430338-9431227
EBF1	PLCB4	chr20-9442642-9443531
EBF1	PLCB4	chr20-9467643-9468570
PRDM13	PLCB4	chr20-9467643-9468570
ST18	PLCB4	chr20-9467643-9468570
NEUROD4	LAMP5	chr20-9430338-9431227
MEIS2	LAMP5	chr20-9430338-9431227
PTF1A	LAMP5	chr20-9442642-9443531
HMGA2	LAMP5	chr20-9442642-9443531
ONECUT1	LAMP5	chr20-9442642-9443531
ZNF423	LAMP5	chr20-9442642-9443531
ONECUT3	LAMP5	chr20-9442642-9443531
PRDM13	LAMP5	chr20-9467643-9468570
FOXP2	LAMP5	chr20-9467643-9468570
ST18	LAMP5	chr20-9467643-9468570
ZFPM2	LAMP5	chr20-9467643-9468570
HMGA2	LAMP5	chr20-9467643-9468570
FOXO1	LAMP5	chr20-9467643-9468570
ZNF423	LAMP5	chr20-9467643-9468570
SOX11	LAMP5	chr20-9491329-9492164
TOX	LAMP5	chr20-9491329-9492164
PTF1A	LAMP5	chr20-9491329-9492164
HMGA2	LAMP5	chr20-9491329-9492164
MEIS2	LAMP5	chr20-9491329-9492164
ZNF423	LAMP5	chr20-9491329-9492164
ZFHX3	LAMP5	chr20-9491329-9492164
SOX11	LAMP5	chr20-9494342-9495177
TFAP2A	LAMP5	chr20-9494342-9495177
TOX	LAMP5	chr20-9494342-9495177
ZFPM2	LAMP5	chr20-9494342-9495177
PTF1A	LAMP5	chr20-9494342-9495177
CUX2	LAMP5	chr20-9494342-9495177
ONECUT2	LAMP5	chr20-9494342-9495177
ONECUT3	LAMP5	chr20-9494342-9495177
POU2F2	LAMP5	chr20-9494342-9495177
SOX11	LAMP5	chr20-9506226-9509295
KLF7	LAMP5	chr20-9506226-9509295
TFAP2A	LAMP5	chr20-9506226-9509295
TFAP2B	LAMP5	chr20-9506226-9509295
PRDM13	LAMP5	chr20-9506226-9509295
TOX	LAMP5	chr20-9506226-9509295
ZFPM2	LAMP5	chr20-9506226-9509295
PTF1A	LAMP5	chr20-9506226-9509295
TCF7L2	LAMP5	chr20-9506226-9509295
NEUROD4	LAMP5	chr20-9506226-9509295
HMGA2	LAMP5	chr20-9506226-9509295
ZNF423	LAMP5	chr20-9506226-9509295
SMAD2	LAMP5	chr20-9506226-9509295
TCF4	LAMP5	chr20-9506226-9509295
PRDM13	LAMP5	chr20-9513960-9514357
PTF1A	LAMP5	chr20-9514917-9515452
HMGA2	LAMP5	chr20-9514917-9515452
FOXO1	LAMP5	chr20-9514917-9515452
POU2F2	LAMP5	chr20-9514917-9515452
KLF7	LAMP5	chr20-9515626-9515999
TFAP2A	LAMP5	chr20-9515626-9515999
TFAP2B	LAMP5	chr20-9516132-9516255
ZFPM2	LAMP5	chr20-9516362-9516767
ZNF423	LAMP5	chr20-9516362-9516767
HMGA2	LAMP5	chr20-9517847-9517951
PTF1A	LAMP5	chr20-9518810-9519116
SMAD2	LAMP5	chr20-9518810-9519116
SOX11	LAMP5	chr20-9520006-9521417
PRDM13	LAMP5	chr20-9520006-9521417
POU6F2	LAMP5	chr20-9520006-9521417
TOX	LAMP5	chr20-9520006-9521417
ZFPM2	LAMP5	chr20-9520006-9521417
PTF1A	LAMP5	chr20-9520006-9521417
TEAD1	LAMP5	chr20-9520006-9521417
MEIS2	LAMP5	chr20-9520006-9521417
ZNF423	LAMP5	chr20-9520006-9521417
ZFHX3	LAMP5	chr20-9520006-9521417
TCF4	LAMP5	chr20-9520006-9521417
POU2F2	LAMP5	chr20-9520006-9521417
SOX11	LAMP5	chr20-9524268-9525166
PRDM13	LAMP5	chr20-9524268-9525166
TOX	LAMP5	chr20-9524268-9525166
ZFPM2	LAMP5	chr20-9524268-9525166
HMGA2	LAMP5	chr20-9524268-9525166
MEIS2	LAMP5	chr20-9524268-9525166
ONECUT1	LAMP5	chr20-9524268-9525166
ONECUT2	LAMP5	chr20-9524268-9525166
ONECUT3	LAMP5	chr20-9524268-9525166
SOX11	SNAP25	chr20-10128021-10128904
PTF1A	SNAP25	chr20-10128021-10128904
TFAP2A	SNAP25	chr20-10131592-10132561
TFAP2B	SNAP25	chr20-10131592-10132561
PRDM13	SNAP25	chr20-10131592-10132561
ZFPM2	SNAP25	chr20-10131592-10132561
PTF1A	SNAP25	chr20-10131592-10132561
NEUROD4	SNAP25	chr20-10131592-10132561
SOX11	SNAP25	chr20-10137342-10138244
PRDM13	SNAP25	chr20-10137342-10138244
FOXP2	SNAP25	chr20-10137342-10138244
TCF7L2	SNAP25	chr20-10137342-10138244
ONECUT1	SNAP25	chr20-10137342-10138244
ONECUT2	SNAP25	chr20-10137342-10138244
EBF1	SNAP25	chr20-10171793-10173092
TFAP2A	SNAP25	chr20-10171793-10173092
TFAP2B	SNAP25	chr20-10171793-10173092
PRDM13	SNAP25	chr20-10171793-10173092
FOXP2	SNAP25	chr20-10171793-10173092
SOX11	SNAP25	chr20-10175208-10176178
PRDM13	SNAP25	chr20-10175208-10176178
ZFPM2	SNAP25	chr20-10175208-10176178
TFAP2A	SNAP25	chr20-10208845-10209802
TFAP2B	SNAP25	chr20-10208845-10209802
POU6F2	SNAP25	chr20-10208845-10209802
PTF1A	SNAP25	chr20-10208845-10209802
DACH1	SNAP25	chr20-10208845-10209802
SOX11	SNAP25	chr20-10216399-10218829
TFAP2A	SNAP25	chr20-10216399-10218829
TFAP2B	SNAP25	chr20-10216399-10218829
PRDM13	SNAP25	chr20-10216399-10218829
FOXP2	SNAP25	chr20-10216399-10218829
PTF1A	SNAP25	chr20-10216399-10218829
ONECUT1	SNAP25	chr20-10216399-10218829
GLI3	SNAP25	chr20-10219214-10220464
ZFPM2	SNAP25	chr20-10219214-10220464
ONECUT2	SNAP25	chr20-10219214-10220464
PRDM13	SNAP25	chr20-10220959-10221848
POU6F2	SNAP25	chr20-10220959-10221848
FOXP2	SNAP25	chr20-10220959-10221848
PTF1A	SNAP25	chr20-10220959-10221848
NEUROD4	SNAP25	chr20-10220959-10221848
TFAP2A	SNAP25	chr20-10224010-10226203
ST18	SNAP25	chr20-10224010-10226203
PTF1A	SNAP25	chr20-10224010-10226203
NEUROD4	SNAP25	chr20-10224010-10226203
DACH1	SNAP25	chr20-10224010-10226203
ONECUT1	SNAP25	chr20-10224010-10226203
ONECUT2	SNAP25	chr20-10224010-10226203
PRDM13	SNAP25	chr20-10236305-10237472
ST18	SNAP25	chr20-10236305-10237472
ZFPM2	SNAP25	chr20-10236305-10237472
PTF1A	SNAP25	chr20-10236305-10237472
TCF7L2	SNAP25	chr20-10236305-10237472
ONECUT1	SNAP25	chr20-10236305-10237472
SOX11	SNAP25	chr20-10239583-10240904
TFAP2A	SNAP25	chr20-10239583-10240904
TFAP2B	SNAP25	chr20-10239583-10240904
ZFPM2	SNAP25	chr20-10239583-10240904
PTF1A	SNAP25	chr20-10239583-10240904
EBF1	SNAP25	chr20-10241834-10242751
PRDM13	SNAP25	chr20-10241834-10242751
ZFPM2	SNAP25	chr20-10241834-10242751
PTF1A	SNAP25	chr20-10241834-10242751
DACH1	SNAP25	chr20-10241834-10242751
MYB	SNAP25	chr20-10247272-10248287
ST18	SNAP25	chr20-10247272-10248287
TCF7L2	SNAP25	chr20-10247272-10248287
SOX11	SNAP25	chr20-10253494-10254447
TFAP2A	SNAP25	chr20-10253494-10254447
PRDM13	SNAP25	chr20-10253494-10254447
NEUROD4	SNAP25	chr20-10253494-10254447
SOX11	SNAP25	chr20-10255557-10256489
POU6F2	SNAP25	chr20-10255557-10256489
FOXP2	SNAP25	chr20-10255557-10256489
ZFPM2	SNAP25	chr20-10255557-10256489
PTF1A	SNAP25	chr20-10255557-10256489
NEUROD4	SNAP25	chr20-10255557-10256489
ONECUT1	SNAP25	chr20-10255557-10256489
ONECUT2	SNAP25	chr20-10255557-10256489
GLI3	SNAP25	chr20-10259036-10260036
ST18	SNAP25	chr20-10259036-10260036
ZFPM2	SNAP25	chr20-10259036-10260036
PTF1A	SNAP25	chr20-10259036-10260036
NEUROD4	SNAP25	chr20-10259036-10260036
DACH1	SNAP25	chr20-10259036-10260036
EBF1	SNAP25	chr20-10262537-10263437
TFAP2A	SNAP25	chr20-10262537-10263437
TFAP2B	SNAP25	chr20-10262537-10263437
SOX11	SNAP25	chr20-10268266-10269234
TFAP2A	SNAP25	chr20-10268266-10269234
TFAP2B	SNAP25	chr20-10268266-10269234
GLI3	SNAP25	chr20-10268266-10269234
ZFPM2	SNAP25	chr20-10268266-10269234
NEUROD4	SNAP25	chr20-10268266-10269234
SOX11	SNAP25	chr20-10270393-10272346
TFAP2A	SNAP25	chr20-10270393-10272346
MYB	SNAP25	chr20-10270393-10272346
ZFPM2	SNAP25	chr20-10270393-10272346
PTF1A	SNAP25	chr20-10270393-10272346
DACH1	SNAP25	chr20-10270393-10272346
FOS	SPTLC3	chr20-12916720-12917920
FOXP2	SPTLC3	chr20-12918625-12919524
HMGA2	SPTLC3	chr20-12918625-12919524
TCF7L1	SPTLC3	chr20-12923459-12924731
CREB5	SPTLC3	chr20-12923459-12924731
HMGA2	SPTLC3	chr20-12923459-12924731
FOS	SPTLC3	chr20-12923459-12924731
RARB	SPTLC3	chr20-12960608-12961531
FOXP2	SPTLC3	chr20-12965134-12967535
NR4A1	SPTLC3	chr20-12965134-12967535
HMGA2	SPTLC3	chr20-12965134-12967535
CREB5	SPTLC3	chr20-12969956-12971071
HMGA2	SPTLC3	chr20-12969956-12971071
HMGA2	SPTLC3	chr20-13003220-13004183
CREB5	SPTLC3	chr20-13009494-13010495
FOXP2	SPTLC3	chr20-13009494-13010495
TCF7L2	SPTLC3	chr20-13009494-13010495
HMGA2	SPTLC3	chr20-13009494-13010495
FOS	SPTLC3	chr20-13009494-13010495
TCF7L1	SPTLC3	chr20-13041560-13042535
HMGA2	SPTLC3	chr20-13041560-13042535
FOS	SPTLC3	chr20-13041560-13042535
HMGA2	SPTLC3	chr20-13096851-13097722
HMGA2	SPTLC3	chr20-13103602-13104557
TCF7L2	SPTLC3	chr20-13105818-13106718
HMGA2	SPTLC3	chr20-13105818-13106718
HMGA2	SPTLC3	chr20-13110648-13111514
NR4A1	SPTLC3	chr20-13115331-13116643
FOXP2	SPTLC3	chr20-13119244-13120179
SATB2	MACROD2	chr20-13928625-13929585
NFIB	MACROD2	chr20-13928625-13929585
ZNF423	MACROD2	chr20-13928625-13929585
NFIX	MACROD2	chr20-13928625-13929585
PRDM13	MACROD2	chr20-13990203-13990476
SOX11	MACROD2	chr20-13990617-13991278
PTF1A	MACROD2	chr20-13990617-13991278
TCF7L2	MACROD2	chr20-13990617-13991278
HEYL	MACROD2	chr20-13995810-13996319
HES6	MACROD2	chr20-13995810-13996319
EBF1	MACROD2	chr20-13995810-13996319
TFAP2A	MACROD2	chr20-13995810-13996319
TFAP2B	MACROD2	chr20-13995810-13996319
PRDM13	MACROD2	chr20-13995810-13996319
PTF1A	MACROD2	chr20-13995810-13996319
ZNF423	MACROD2	chr20-13995810-13996319
TCF4	MACROD2	chr20-13995810-13996319
SATB2	MACROD2	chr20-14053760-14054497
PRDM13	MACROD2	chr20-14053760-14054497
TCF4	MACROD2	chr20-14053760-14054497
SOX11	MACROD2	chr20-14054989-14055928
PTF1A	MACROD2	chr20-14054989-14055928
NEUROD4	MACROD2	chr20-14054989-14055928
DACH1	MACROD2	chr20-14054989-14055928
ZNF423	MACROD2	chr20-14054989-14055928
TCF4	MACROD2	chr20-14054989-14055928
SATB2	MACROD2	chr20-14141851-14142787
ZNF423	MACROD2	chr20-14141851-14142787
SATB2	MACROD2	chr20-14155365-14156196
POU6F2	MACROD2	chr20-14155365-14156196
ST18	MACROD2	chr20-14189629-14190529
NEUROD4	MACROD2	chr20-14189629-14190529
PTF1A	MACROD2	chr20-14226056-14227051
ZNF423	MACROD2	chr20-14226056-14227051
TCF4	MACROD2	chr20-14226056-14227051
TCF7L2	MACROD2	chr20-14235233-14236208
POU6F2	MACROD2	chr20-14293767-14294717
SATB2	MACROD2	chr20-14331265-14332068
PRDM13	MACROD2	chr20-14331265-14332068
POU6F2	MACROD2	chr20-14331265-14332068
ZNF423	MACROD2	chr20-14331265-14332068
SOX11	MACROD2	chr20-14334217-14335839
SATB2	MACROD2	chr20-14334217-14335839
TFAP2A	MACROD2	chr20-14334217-14335839
TFAP2B	MACROD2	chr20-14334217-14335839
PRDM13	MACROD2	chr20-14334217-14335839
PTF1A	MACROD2	chr20-14334217-14335839
TCF7L2	MACROD2	chr20-14334217-14335839
SATB2	MACROD2	chr20-14336662-14337403
PRDM13	MACROD2	chr20-14336662-14337403
ST18	MACROD2	chr20-14336662-14337403
SOX11	MACROD2	chr20-14337617-14338127
NEUROD4	MACROD2	chr20-14337617-14338127
SOX11	MACROD2	chr20-14344496-14345410
SATB2	MACROD2	chr20-14344496-14345410
EBF1	MACROD2	chr20-14344496-14345410
TFAP2A	MACROD2	chr20-14344496-14345410
TFAP2B	MACROD2	chr20-14344496-14345410
POU6F2	MACROD2	chr20-14344496-14345410
ST18	MACROD2	chr20-14344496-14345410
TCF7L2	MACROD2	chr20-14344496-14345410
EBF3	MACROD2	chr20-14344496-14345410
ZNF423	MACROD2	chr20-14344496-14345410
SOX11	MACROD2	chr20-14373950-14374911
SATB2	MACROD2	chr20-14373950-14374911
EBF1	MACROD2	chr20-14373950-14374911
DACH1	MACROD2	chr20-14373950-14374911
POU6F2	MACROD2	chr20-14393321-14394275
PTF1A	MACROD2	chr20-14393321-14394275
TCF4	MACROD2	chr20-14393321-14394275
SOX11	MACROD2	chr20-14401342-14402411
SATB2	MACROD2	chr20-14401342-14402411
NFIB	MACROD2	chr20-14401342-14402411
PTF1A	MACROD2	chr20-14401342-14402411
EBF3	MACROD2	chr20-14401342-14402411
DACH1	MACROD2	chr20-14401342-14402411
NFIX	MACROD2	chr20-14401342-14402411
SOX11	MACROD2	chr20-14449350-14450272
SATB2	MACROD2	chr20-14449350-14450272
EBF1	MACROD2	chr20-14449350-14450272
POU6F2	MACROD2	chr20-14449350-14450272
PTF1A	MACROD2	chr20-14449350-14450272
EBF3	MACROD2	chr20-14449350-14450272
NEUROD4	MACROD2	chr20-14449350-14450272
NFIX	MACROD2	chr20-14449350-14450272
SOX11	MACROD2	chr20-14470369-14471568
TFAP2A	MACROD2	chr20-14470369-14471568
TFAP2B	MACROD2	chr20-14470369-14471568
PRDM13	MACROD2	chr20-14470369-14471568
NFIB	MACROD2	chr20-14470369-14471568
PTF1A	MACROD2	chr20-14470369-14471568
EBF3	MACROD2	chr20-14470369-14471568
NFIX	MACROD2	chr20-14470369-14471568
SATB2	MACROD2	chr20-14480141-14481036
PTF1A	MACROD2	chr20-14480141-14481036
TCF7L2	MACROD2	chr20-14480141-14481036
ZNF423	MACROD2	chr20-14480141-14481036
SATB2	MACROD2	chr20-14498567-14499504
PRDM13	MACROD2	chr20-14498567-14499504
PTF1A	MACROD2	chr20-14498567-14499504
ZNF423	MACROD2	chr20-14498567-14499504
SOX11	MACROD2	chr20-14566934-14569167
SATB2	MACROD2	chr20-14566934-14569167
TFAP2A	MACROD2	chr20-14566934-14569167
TFAP2B	MACROD2	chr20-14566934-14569167
POU6F2	MACROD2	chr20-14566934-14569167
NFIB	MACROD2	chr20-14566934-14569167
PTF1A	MACROD2	chr20-14566934-14569167
TCF7L2	MACROD2	chr20-14566934-14569167
ZNF423	MACROD2	chr20-14566934-14569167
NFIX	MACROD2	chr20-14566934-14569167
SOX11	MACROD2	chr20-14575884-14576856
SATB2	MACROD2	chr20-14575884-14576856
ZNF423	MACROD2	chr20-14575884-14576856
SOX11	MACROD2	chr20-14582017-14583207
SATB2	MACROD2	chr20-14582017-14583207
PTF1A	MACROD2	chr20-14582017-14583207
ZNF423	MACROD2	chr20-14582017-14583207
SOX11	MACROD2	chr20-14597428-14598383
POU6F2	MACROD2	chr20-14597428-14598383
ZNF423	MACROD2	chr20-14597428-14598383
PRDM13	MACROD2	chr20-14599296-14600262
PTF1A	MACROD2	chr20-14599296-14600262
ZNF423	MACROD2	chr20-14599296-14600262
SOX11	MACROD2	chr20-14602435-14603279
SATB2	MACROD2	chr20-14602435-14603279
TCF7L2	MACROD2	chr20-14602435-14603279
SATB2	MACROD2	chr20-14659655-14660513
TCF7L2	MACROD2	chr20-14659655-14660513
TFAP2A	MACROD2	chr20-14685080-14685942
TCF7L2	MACROD2	chr20-14685080-14685942
TFAP2A	MACROD2	chr20-14687625-14688574
TFAP2B	MACROD2	chr20-14687625-14688574
SATB2	MACROD2	chr20-14692855-14693743
TFAP2A	MACROD2	chr20-14692855-14693743
PTF1A	MACROD2	chr20-14692855-14693743
DACH1	MACROD2	chr20-14692855-14693743
SOX11	MACROD2	chr20-14716031-14717077
PRDM13	MACROD2	chr20-14716031-14717077
SOX11	MACROD2	chr20-14740221-14741127
POU6F2	MACROD2	chr20-14740221-14741127
NEUROD4	MACROD2	chr20-14740221-14741127
ZNF423	MACROD2	chr20-14740221-14741127
TCF4	MACROD2	chr20-14757519-14757977
SOX11	MACROD2	chr20-14758082-14758977
POU6F2	MACROD2	chr20-14758082-14758977
ZNF423	MACROD2	chr20-14758082-14758977
POU6F2	MACROD2	chr20-14800615-14801580
ZNF423	MACROD2	chr20-14800615-14801580
NFIB	MACROD2	chr20-14820477-14821399
EBF3	MACROD2	chr20-14820477-14821399
NEUROD4	MACROD2	chr20-14820477-14821399
NFIX	MACROD2	chr20-14820477-14821399
SOX11	MACROD2	chr20-14824417-14826070
POU6F2	MACROD2	chr20-14824417-14826070
PTF1A	MACROD2	chr20-14824417-14826070
ZNF423	MACROD2	chr20-14824417-14826070
SOX11	MACROD2	chr20-14826619-14827657
SATB2	MACROD2	chr20-14826619-14827657
EBF1	MACROD2	chr20-14826619-14827657
PTF1A	MACROD2	chr20-14826619-14827657
TCF7L2	MACROD2	chr20-14826619-14827657
EBF3	MACROD2	chr20-14826619-14827657
DACH1	MACROD2	chr20-14826619-14827657
ZNF423	MACROD2	chr20-14826619-14827657
SOX11	MACROD2	chr20-14829788-14830763
SATB2	MACROD2	chr20-14829788-14830763
EBF1	MACROD2	chr20-14829788-14830763
EBF3	MACROD2	chr20-14829788-14830763
ZNF423	MACROD2	chr20-14829788-14830763
HES6	MACROD2	chr20-14838324-14839349
PRDM13	MACROD2	chr20-14838324-14839349
POU6F2	MACROD2	chr20-14838324-14839349
PTF1A	MACROD2	chr20-14838324-14839349
TCF7L2	MACROD2	chr20-14838324-14839349
SOX11	MACROD2	chr20-14859998-14861019
SATB2	MACROD2	chr20-14859998-14861019
TFAP2A	MACROD2	chr20-14859998-14861019
PRDM13	MACROD2	chr20-14859998-14861019
TCF7L2	MACROD2	chr20-14859998-14861019
ZNF423	MACROD2	chr20-14859998-14861019
PRDM13	MACROD2	chr20-14861139-14862102
NEUROD4	MACROD2	chr20-14861139-14862102
DACH1	MACROD2	chr20-14861139-14862102
PTF1A	MACROD2	chr20-14864579-14865502
SOX11	MACROD2	chr20-14879156-14879873
SATB2	MACROD2	chr20-14879156-14879873
PTF1A	MACROD2	chr20-14879156-14879873
SOX11	MACROD2	chr20-14880134-14881071
SATB2	MACROD2	chr20-14880134-14881071
PRDM13	MACROD2	chr20-14880134-14881071
ZNF423	MACROD2	chr20-14888669-14888827
HES5	MACROD2	chr20-14913462-14914402
SOX11	MACROD2	chr20-14913462-14914402
HES6	MACROD2	chr20-14913462-14914402
TFAP2A	MACROD2	chr20-14913462-14914402
PRDM13	MACROD2	chr20-14913462-14914402
PTF1A	MACROD2	chr20-14913462-14914402
ZNF423	MACROD2	chr20-14913462-14914402
ZNF423	MACROD2	chr20-14915153-14916062
TCF4	MACROD2	chr20-14915153-14916062
NFIX	MACROD2	chr20-14915153-14916062
SOX11	MACROD2	chr20-14921110-14922025
SATB2	MACROD2	chr20-14921110-14922025
TFAP2A	MACROD2	chr20-14921110-14922025
NFIB	MACROD2	chr20-14921110-14922025
PTF1A	MACROD2	chr20-14921110-14922025
DACH1	MACROD2	chr20-14921110-14922025
PTF1A	MACROD2	chr20-14926298-14926765
ZNF423	MACROD2	chr20-14926298-14926765
TCF4	MACROD2	chr20-14926298-14926765
SOX11	MACROD2	chr20-14953308-14954168
PRDM13	MACROD2	chr20-14953308-14954168
TCF7L2	MACROD2	chr20-14953308-14954168
SOX11	MACROD2	chr20-14955055-14957014
SATB2	MACROD2	chr20-14955055-14957014
PRDM13	MACROD2	chr20-14955055-14957014
POU6F2	MACROD2	chr20-14955055-14957014
TCF4	MACROD2	chr20-14955055-14957014
SOX11	MACROD2	chr20-15006328-15007340
PRDM13	MACROD2	chr20-15006328-15007340
POU6F2	MACROD2	chr20-15006328-15007340
PTF1A	MACROD2	chr20-15006328-15007340
HES5	MACROD2	chr20-15012289-15013399
SOX11	MACROD2	chr20-15012289-15013399
TFAP2A	MACROD2	chr20-15012289-15013399
PRDM13	MACROD2	chr20-15012289-15013399
PTF1A	MACROD2	chr20-15012289-15013399
TCF7L2	MACROD2	chr20-15012289-15013399
TCF4	MACROD2	chr20-15012289-15013399
PRDM13	MACROD2	chr20-15014149-15015069
NFIB	MACROD2	chr20-15014149-15015069
ZNF423	MACROD2	chr20-15018245-15019156
SOX11	MACROD2	chr20-15060369-15061007
TFAP2A	MACROD2	chr20-15060369-15061007
TFAP2B	MACROD2	chr20-15060369-15061007
TCF7L2	MACROD2	chr20-15060369-15061007
NFIX	MACROD2	chr20-15060369-15061007
TFAP2A	MACROD2	chr20-15061114-15062074
TFAP2B	MACROD2	chr20-15061114-15062074
PRDM13	MACROD2	chr20-15061114-15062074
NFIB	MACROD2	chr20-15061114-15062074
PTF1A	MACROD2	chr20-15061114-15062074
NFIX	MACROD2	chr20-15061114-15062074
SOX11	MACROD2	chr20-15076609-15077459
SATB2	MACROD2	chr20-15076609-15077459
POU6F2	MACROD2	chr20-15076609-15077459
ST18	MACROD2	chr20-15076609-15077459
NFIB	MACROD2	chr20-15076609-15077459
ZNF423	MACROD2	chr20-15076609-15077459
NFIX	MACROD2	chr20-15076609-15077459
SOX11	MACROD2	chr20-15082772-15083647
PTF1A	MACROD2	chr20-15082772-15083647
NEUROD4	MACROD2	chr20-15082772-15083647
EBF1	MACROD2	chr20-15119409-15119653
EBF3	MACROD2	chr20-15119409-15119653
SOX11	MACROD2	chr20-15139051-15140013
TCF4	MACROD2	chr20-15139051-15140013
NFIX	MACROD2	chr20-15139051-15140013
SOX11	MACROD2	chr20-15192186-15193131
NFIB	MACROD2	chr20-15192186-15193131
NEUROD4	MACROD2	chr20-15192186-15193131
ZNF423	MACROD2	chr20-15192186-15193131
SOX11	MACROD2	chr20-15252061-15253027
TFAP2A	MACROD2	chr20-15252061-15253027
PRDM13	MACROD2	chr20-15252061-15253027
POU6F2	MACROD2	chr20-15252061-15253027
ST18	MACROD2	chr20-15252061-15253027
TFAP2A	MACROD2	chr20-15339004-15339906
TFAP2B	MACROD2	chr20-15339004-15339906
NEUROD4	MACROD2	chr20-15339004-15339906
PRDM13	MACROD2	chr20-15342590-15343668
HIF1A	MACROD2	chr20-15342590-15343668
HES5	MACROD2	chr20-15475209-15476143
HEYL	MACROD2	chr20-15475209-15476143
SOX11	MACROD2	chr20-15475209-15476143
PRDM13	MACROD2	chr20-15475209-15476143
ST18	MACROD2	chr20-15475209-15476143
NFIB	MACROD2	chr20-15475209-15476143
EBF3	MACROD2	chr20-15475209-15476143
ZNF423	MACROD2	chr20-15475209-15476143
NFIX	MACROD2	chr20-15475209-15476143
HEYL	MACROD2	chr20-15494530-15495438
SATB2	MACROD2	chr20-15494530-15495438
EBF1	MACROD2	chr20-15494530-15495438
TCF7L2	MACROD2	chr20-15494530-15495438
ZNF423	MACROD2	chr20-15494530-15495438
SOX11	MACROD2	chr20-15515025-15515421
NFIB	MACROD2	chr20-15515025-15515421
SOX11	MACROD2	chr20-15515467-15516368
SATB2	MACROD2	chr20-15515467-15516368
NEUROD4	MACROD2	chr20-15515467-15516368
ZNF423	MACROD2	chr20-15515467-15516368
PTF1A	MACROD2	chr20-15555701-15556755
NEUROD4	MACROD2	chr20-15555701-15556755
SOX11	MACROD2	chr20-15557444-15558376
ST18	MACROD2	chr20-15557444-15558376
PTF1A	MACROD2	chr20-15557444-15558376
EBF3	MACROD2	chr20-15557444-15558376
SOX11	MACROD2	chr20-15563608-15564659
SATB2	MACROD2	chr20-15563608-15564659
TCF7L2	MACROD2	chr20-15563608-15564659
NEUROD4	MACROD2	chr20-15563608-15564659
ZNF423	MACROD2	chr20-15563608-15564659
SATB2	MACROD2	chr20-15565515-15566482
HES6	MACROD2	chr20-15565515-15566482
EBF1	MACROD2	chr20-15565515-15566482
PRDM13	MACROD2	chr20-15565515-15566482
PTF1A	MACROD2	chr20-15565515-15566482
SOX11	MACROD2	chr20-15568092-15568999
PTF1A	MACROD2	chr20-15568092-15568999
TCF7L2	MACROD2	chr20-15568092-15568999
SOX11	MACROD2	chr20-15585697-15586592
SATB2	MACROD2	chr20-15585697-15586592
PRDM13	MACROD2	chr20-15585697-15586592
ST18	MACROD2	chr20-15585697-15586592
SOX11	MACROD2	chr20-15591904-15592759
EBF1	MACROD2	chr20-15591904-15592759
PRDM13	MACROD2	chr20-15591904-15592759
PTF1A	MACROD2	chr20-15591904-15592759
NEUROD4	MACROD2	chr20-15591904-15592759
SOX11	MACROD2	chr20-15653840-15654853
SATB2	MACROD2	chr20-15653840-15654853
TFAP2A	MACROD2	chr20-15653840-15654853
TFAP2B	MACROD2	chr20-15653840-15654853
PRDM13	MACROD2	chr20-15653840-15654853
NFIB	MACROD2	chr20-15653840-15654853
PTF1A	MACROD2	chr20-15653840-15654853
SOX11	MACROD2	chr20-15658030-15658980
TFAP2A	MACROD2	chr20-15658030-15658980
TFAP2B	MACROD2	chr20-15658030-15658980
SATB2	MACROD2	chr20-15708700-15709577
PRDM13	MACROD2	chr20-15708700-15709577
NEUROD4	MACROD2	chr20-15708700-15709577
ZNF423	MACROD2	chr20-15708700-15709577
EBF1	MACROD2	chr20-15759529-15760776
PRDM13	MACROD2	chr20-15759529-15760776
NEUROD4	MACROD2	chr20-15759529-15760776
ZNF423	MACROD2	chr20-15759529-15760776
TCF4	MACROD2	chr20-15759529-15760776
SOX11	MACROD2	chr20-15794350-15795390
EBF1	MACROD2	chr20-15794350-15795390
TFAP2A	MACROD2	chr20-15794350-15795390
TFAP2B	MACROD2	chr20-15794350-15795390
PRDM13	MACROD2	chr20-15794350-15795390
EBF3	MACROD2	chr20-15794350-15795390
ZNF423	MACROD2	chr20-15794350-15795390
SATB2	MACROD2	chr20-15805859-15806831
PTF1A	MACROD2	chr20-15811554-15812558
TCF7L2	MACROD2	chr20-15811554-15812558
ZNF423	MACROD2	chr20-15811554-15812558
SATB2	MACROD2	chr20-15823459-15824405
ZNF423	MACROD2	chr20-15823459-15824405
EBF1	MACROD2	chr20-15835578-15836568
PRDM13	MACROD2	chr20-15835578-15836568
POU6F2	MACROD2	chr20-15835578-15836568
EBF3	MACROD2	chr20-15835578-15836568
SOX11	MACROD2	chr20-15842859-15843829
SATB2	MACROD2	chr20-15842859-15843829
TCF7L2	MACROD2	chr20-15842859-15843829
SOX11	MACROD2	chr20-15847181-15848060
ST18	MACROD2	chr20-15847181-15848060
NEUROD4	MACROD2	chr20-15847181-15848060
SOX11	MACROD2	chr20-15848086-15848660
PRDM13	MACROD2	chr20-15848086-15848660
NFIB	MACROD2	chr20-15848086-15848660
EBF3	MACROD2	chr20-15848086-15848660
NFIX	MACROD2	chr20-15848086-15848660
HEYL	MACROD2	chr20-15851489-15852491
SOX11	MACROD2	chr20-15851489-15852491
SATB2	MACROD2	chr20-15851489-15852491
HES6	MACROD2	chr20-15851489-15852491
PRDM13	MACROD2	chr20-15851489-15852491
ZNF423	MACROD2	chr20-15851489-15852491
TFAP2A	MACROD2	chr20-15854597-15855536
PTF1A	MACROD2	chr20-15854597-15855536
SATB2	MACROD2	chr20-15875186-15876106
ZNF423	MACROD2	chr20-15875186-15876106
EBF1	MACROD2	chr20-15888877-15890031
TFAP2A	MACROD2	chr20-15888877-15890031
NFIB	MACROD2	chr20-15888877-15890031
EBF3	MACROD2	chr20-15888877-15890031
NFIX	MACROD2	chr20-15888877-15890031
SOX11	MACROD2	chr20-15893683-15894564
PTF1A	MACROD2	chr20-15893683-15894564
ZNF423	MACROD2	chr20-15893683-15894564
TCF4	MACROD2	chr20-15893683-15894564
SOX11	MACROD2	chr20-15899548-15900607
SOX11	MACROD2	chr20-15905525-15906447
TFAP2A	MACROD2	chr20-15905525-15906447
PRDM13	MACROD2	chr20-15905525-15906447
NFIB	MACROD2	chr20-15905525-15906447
EBF3	MACROD2	chr20-15905525-15906447
ZNF423	MACROD2	chr20-15905525-15906447
SOX11	MACROD2	chr20-15921634-15922516
TFAP2A	MACROD2	chr20-15921634-15922516
PTF1A	MACROD2	chr20-15921634-15922516
TCF7L2	MACROD2	chr20-15921634-15922516
NEUROD4	MACROD2	chr20-15921634-15922516
DACH1	MACROD2	chr20-15921634-15922516
ZNF423	MACROD2	chr20-15921634-15922516
SOX11	MACROD2	chr20-15929999-15930965
EBF1	MACROD2	chr20-15929999-15930965
TFAP2A	MACROD2	chr20-15929999-15930965
TFAP2B	MACROD2	chr20-15929999-15930965
PRDM13	MACROD2	chr20-15929999-15930965
EBF3	MACROD2	chr20-15929999-15930965
NFIX	MACROD2	chr20-15929999-15930965
ST18	MACROD2	chr20-15936850-15937475
PTF1A	MACROD2	chr20-15936850-15937475
ZNF423	MACROD2	chr20-15936850-15937475
SOX11	MACROD2	chr20-15961815-15962630
PRDM13	MACROD2	chr20-15961815-15962630
PTF1A	MACROD2	chr20-15961815-15962630
DACH1	MACROD2	chr20-15961815-15962630
SOX11	MACROD2	chr20-15975878-15976983
PRDM13	MACROD2	chr20-15975878-15976983
PTF1A	MACROD2	chr20-15975878-15976983
TCF7L2	MACROD2	chr20-15975878-15976983
NEUROD4	MACROD2	chr20-15975878-15976983
ZNF423	MACROD2	chr20-15975878-15976983
SATB2	MACROD2	chr20-16005413-16006389
TFAP2A	MACROD2	chr20-16005413-16006389
TFAP2B	MACROD2	chr20-16005413-16006389
PRDM13	MACROD2	chr20-16005413-16006389
POU6F2	MACROD2	chr20-16005413-16006389
PTF1A	MACROD2	chr20-16005413-16006389
NEUROD4	MACROD2	chr20-16005413-16006389
ZNF423	MACROD2	chr20-16005413-16006389
NFIX	MACROD2	chr20-16005413-16006389
SOX11	MACROD2	chr20-16010812-16011751
TFAP2A	MACROD2	chr20-16010812-16011751
TFAP2B	MACROD2	chr20-16010812-16011751
PTF1A	MACROD2	chr20-16010812-16011751
ZNF423	MACROD2	chr20-16010812-16011751
SOX11	MACROD2	chr20-16024172-16025013
SATB2	MACROD2	chr20-16024172-16025013
PRDM13	MACROD2	chr20-16024172-16025013
ZNF423	MACROD2	chr20-16024172-16025013
SOX11	MACROD2	chr20-16026898-16027471
TCF7L2	MACROD2	chr20-16026898-16027471
ZNF423	MACROD2	chr20-16026898-16027471
SOX11	MACROD2	chr20-16027481-16028424
TFAP2A	MACROD2	chr20-16027481-16028424
TFAP2B	MACROD2	chr20-16027481-16028424
PRDM13	MACROD2	chr20-16027481-16028424
POU6F2	MACROD2	chr20-16027481-16028424
PRDM13	MACROD2	chr20-16033842-16034854
POU6F2	MACROD2	chr20-16033842-16034854
TCF7L2	MACROD2	chr20-16033842-16034854
HIF1A	MACROD2	chr20-16033842-16034854
SOX11	MACROD2	chr20-16036047-16037179
PRDM13	MACROD2	chr20-16036047-16037179
SOX11	MACROD2	chr20-16048616-16049541
ZFPM2	FLRT3	chr20-14331265-14332068
SOX11	FLRT3	chr20-14334217-14335839
SOX11	FLRT3	chr20-14337617-14338127
SOX11	FLRT3	chr20-14344496-14345410
SOX11	FLRT3	chr20-14373950-14374911
SOX11	FLRT3	chr20-14401342-14402411
ZFPM2	KIF16B	chr20-16178286-16179319
ZFPM2	KIF16B	chr20-16189068-16189998
EBF3	KIF16B	chr20-16189068-16189998
ZFPM2	KIF16B	chr20-16221340-16222290
SATB2	KIF16B	chr20-16225426-16226614
ZFPM2	KIF16B	chr20-16225426-16226614
NFIB	KIF16B	chr20-16225426-16226614
EBF3	KIF16B	chr20-16225426-16226614
NFIX	KIF16B	chr20-16225426-16226614
SATB2	KIF16B	chr20-16236618-16237711
EBF3	KIF16B	chr20-16236618-16237711
ZFPM2	KIF16B	chr20-16241610-16242502
TCF4	KIF16B	chr20-16241610-16242502
ZFPM2	KIF16B	chr20-16243189-16244158
NFIB	KIF16B	chr20-16243189-16244158
SATB2	KIF16B	chr20-16244843-16245202
ZFPM2	KIF16B	chr20-16263238-16264224
EBF3	KIF16B	chr20-16263238-16264224
SATB2	KIF16B	chr20-16271113-16272098
ZFHX3	KIF16B	chr20-16271113-16272098
SATB2	KIF16B	chr20-16273554-16274560
ZFPM2	KIF16B	chr20-16273554-16274560
NFIX	KIF16B	chr20-16273554-16274560
ZFPM2	KIF16B	chr20-16348633-16349405
ZFHX3	KIF16B	chr20-16348633-16349405
TCF4	KIF16B	chr20-16348633-16349405
ZFPM2	KIF16B	chr20-16349694-16351891
TCF4	KIF16B	chr20-16349694-16351891
ZFPM2	KIF16B	chr20-16366204-16366842
NFIB	KIF16B	chr20-16366204-16366842
ZFPM2	KIF16B	chr20-16404187-16404812
NFIX	KIF16B	chr20-16404187-16404812
ZFHX3	KIF16B	chr20-16404902-16405723
SATB2	KIF16B	chr20-16407056-16407876
ZFPM2	KIF16B	chr20-16407056-16407876
TCF4	KIF16B	chr20-16407056-16407876
SATB2	KIF16B	chr20-16433516-16434846
ZFPM2	KIF16B	chr20-16433516-16434846
NFIX	KIF16B	chr20-16441220-16442239
SATB2	KIF16B	chr20-16457253-16458177
ZFPM2	KIF16B	chr20-16457253-16458177
TCF4	KIF16B	chr20-16457253-16458177
NFIX	KIF16B	chr20-16483872-16484860
SATB2	KIF16B	chr20-16485398-16486237
SATB2	KIF16B	chr20-16487732-16488713
ZFPM2	KIF16B	chr20-16487732-16488713
ZFHX3	KIF16B	chr20-16507107-16507940
ZFPM2	KIF16B	chr20-16508347-16509118
SATB2	KIF16B	chr20-16512468-16512825
NFIX	KIF16B	chr20-16516181-16516912
SATB2	KIF16B	chr20-16517943-16518913
EBF3	KIF16B	chr20-16517943-16518913
NFIX	KIF16B	chr20-16517943-16518913
SATB2	KIF16B	chr20-16519840-16520849
TCF4	KIF16B	chr20-16519840-16520849
ZFPM2	KIF16B	chr20-16547402-16548868
TCF4	KIF16B	chr20-16547402-16548868
NFIX	KIF16B	chr20-16547402-16548868
EBF3	KIF16B	chr20-16568423-16569274
ZFPM2	KIF16B	chr20-16573435-16576067
NFIX	KIF16B	chr20-16573435-16576067
SATB2	KIF16B	chr20-16577161-16578096
ZFPM2	KIF16B	chr20-16577161-16578096
SATB2	KIF16B	chr20-16579616-16580257
EBF3	KIF16B	chr20-16580623-16581149
ZFPM2	KIF16B	chr20-16607651-16608547
NFIB	KIF16B	chr20-16607651-16608547
TCF4	KIF16B	chr20-16607651-16608547
NFIX	KIF16B	chr20-16607651-16608547
SATB2	KIF16B	chr20-16614886-16615800
NFIB	KIF16B	chr20-16614886-16615800
TCF4	KIF16B	chr20-16614886-16615800
NFIX	KIF16B	chr20-16614886-16615800
SATB2	KIF16B	chr20-16616845-16617814
ZFHX3	KIF16B	chr20-16616845-16617814
SATB2	KIF16B	chr20-16663681-16664699
EBF3	KIF16B	chr20-16663681-16664699
ZFPM2	KIF16B	chr20-16671724-16672540
ZNF536	PCSK2	chr20-17140377-17141224
PRDM6	PCSK2	chr20-17149361-17150873
EBF1	PCSK2	chr20-17149361-17150873
PTF1A	PCSK2	chr20-17149361-17150873
PRDM6	PCSK2	chr20-17158618-17159699
EBF1	PCSK2	chr20-17158618-17159699
NFIA	PCSK2	chr20-17161498-17162531
PRDM6	PCSK2	chr20-17161498-17162531
MEIS2	PCSK2	chr20-17161498-17162531
ZNF536	PCSK2	chr20-17161498-17162531
TFAP2A	PCSK2	chr20-17169407-17170413
PTF1A	PCSK2	chr20-17169407-17170413
PRDM6	PCSK2	chr20-17172639-17173629
ONECUT1	PCSK2	chr20-17172639-17173629
ONECUT3	PCSK2	chr20-17172639-17173629
PRDM6	PCSK2	chr20-17176878-17177902
TFAP2A	PCSK2	chr20-17176878-17177902
PRDM6	PCSK2	chr20-17179429-17180443
EBF1	PCSK2	chr20-17179429-17180443
TFAP2A	PCSK2	chr20-17179429-17180443
PTF1A	PCSK2	chr20-17179429-17180443
MEIS2	PCSK2	chr20-17179429-17180443
PRDM6	PCSK2	chr20-17202451-17203380
MEIS2	PCSK2	chr20-17202451-17203380
PRDM6	PCSK2	chr20-17222148-17223011
DACH1	PCSK2	chr20-17222148-17223011
KLF7	PCSK2	chr20-17225252-17226106
PRDM6	PCSK2	chr20-17225252-17226106
PTF1A	PCSK2	chr20-17225252-17226106
MEIS2	PCSK2	chr20-17225252-17226106
ONECUT3	PCSK2	chr20-17225252-17226106
EBF1	PCSK2	chr20-17226380-17226990
TFAP2A	PCSK2	chr20-17226380-17226990
ZNF536	PCSK2	chr20-17227483-17228130
NFIA	PCSK2	chr20-17228303-17229232
EBF1	PCSK2	chr20-17233196-17234189
MEIS2	PCSK2	chr20-17233196-17234189
ONECUT1	PCSK2	chr20-17233196-17234189
ONECUT2	PCSK2	chr20-17233196-17234189
ONECUT3	PCSK2	chr20-17233196-17234189
RARB	PCSK2	chr20-17242312-17243389
PRDM6	PCSK2	chr20-17242312-17243389
PTF1A	PCSK2	chr20-17242312-17243389
MEIS2	PCSK2	chr20-17242312-17243389
ONECUT1	PCSK2	chr20-17242312-17243389
ONECUT3	PCSK2	chr20-17242312-17243389
PTF1A	PCSK2	chr20-17248328-17248475
EBF1	PCSK2	chr20-17266843-17267737
PTF1A	PCSK2	chr20-17266843-17267737
MEIS2	PCSK2	chr20-17266843-17267737
PRDM6	PCSK2	chr20-17270366-17271290
LHX9	PCSK2	chr20-17281124-17283222
RARB	PCSK2	chr20-17281124-17283222
PRDM6	PCSK2	chr20-17281124-17283222
EBF1	PCSK2	chr20-17281124-17283222
MEIS2	PCSK2	chr20-17281124-17283222
ONECUT1	PCSK2	chr20-17281124-17283222
ONECUT2	PCSK2	chr20-17281124-17283222
ONECUT3	PCSK2	chr20-17281124-17283222
LHX9	PCSK2	chr20-17295148-17296462
PRDM6	PCSK2	chr20-17295148-17296462
PTF1A	PCSK2	chr20-17295148-17296462
MEIS2	PCSK2	chr20-17295148-17296462
ONECUT1	PCSK2	chr20-17295148-17296462
ONECUT3	PCSK2	chr20-17295148-17296462
PRDM6	PCSK2	chr20-17299789-17300757
EBF1	PCSK2	chr20-17299789-17300757
MEIS2	PCSK2	chr20-17299789-17300757
KLF7	PCSK2	chr20-17314007-17317392
PRDM6	PCSK2	chr20-17314007-17317392
EBF1	PCSK2	chr20-17314007-17317392
PTF1A	PCSK2	chr20-17314007-17317392
MEIS2	PCSK2	chr20-17314007-17317392
ONECUT1	PCSK2	chr20-17314007-17317392
ONECUT2	PCSK2	chr20-17314007-17317392
ONECUT3	PCSK2	chr20-17314007-17317392
ZNF536	PCSK2	chr20-17314007-17317392
PRDM6	PCSK2	chr20-17318610-17318859
PRDM6	PCSK2	chr20-17326764-17328111
EBF1	PCSK2	chr20-17326764-17328111
TFAP2A	PCSK2	chr20-17326764-17328111
PTF1A	PCSK2	chr20-17326764-17328111
MEIS2	PCSK2	chr20-17326764-17328111
ZNF536	PCSK2	chr20-17326764-17328111
PTF1A	PCSK2	chr20-17334391-17335295
PRDM6	PCSK2	chr20-17341061-17341973
PTF1A	PCSK2	chr20-17341061-17341973
MEIS2	PCSK2	chr20-17341061-17341973
ONECUT1	PCSK2	chr20-17341061-17341973
ONECUT3	PCSK2	chr20-17341061-17341973
ZNF536	PCSK2	chr20-17341061-17341973
PRDM6	PCSK2	chr20-17343491-17344607
PTF1A	PCSK2	chr20-17343491-17344607
LHX9	PCSK2	chr20-17344949-17345660
EBF1	PCSK2	chr20-17344949-17345660
PRDM6	PCSK2	chr20-17346739-17347763
MEIS2	PCSK2	chr20-17346739-17347763
ONECUT1	PCSK2	chr20-17346739-17347763
ONECUT2	PCSK2	chr20-17346739-17347763
ONECUT3	PCSK2	chr20-17346739-17347763
LHX9	PCSK2	chr20-17349974-17350976
PTF1A	PCSK2	chr20-17349974-17350976
DACH1	PCSK2	chr20-17349974-17350976
NFIA	PCSK2	chr20-17355368-17356239
PRDM6	PCSK2	chr20-17355368-17356239
PTF1A	PCSK2	chr20-17355368-17356239
EBF1	PCSK2	chr20-17358441-17359328
TFAP2A	PCSK2	chr20-17358441-17359328
ONECUT1	PCSK2	chr20-17358441-17359328
ONECUT2	PCSK2	chr20-17358441-17359328
ONECUT3	PCSK2	chr20-17358441-17359328
ZNF536	PCSK2	chr20-17358441-17359328
PRDM6	PCSK2	chr20-17361042-17362003
PTF1A	PCSK2	chr20-17361042-17362003
ZNF536	PCSK2	chr20-17361042-17362003
EBF1	PCSK2	chr20-17368554-17369239
TFAP2A	PCSK2	chr20-17368554-17369239
PTF1A	PCSK2	chr20-17368554-17369239
EBF1	PCSK2	chr20-17372755-17373577
PTF1A	PCSK2	chr20-17372755-17373577
PRDM6	PCSK2	chr20-17377023-17377948
EBF1	PCSK2	chr20-17377023-17377948
TFAP2A	PCSK2	chr20-17377023-17377948
MEIS2	PCSK2	chr20-17377023-17377948
ONECUT1	PCSK2	chr20-17377023-17377948
PRDM6	PCSK2	chr20-17388381-17389238
ONECUT1	PCSK2	chr20-17388381-17389238
NFIA	PCSK2	chr20-17391117-17392184
RARB	PCSK2	chr20-17391117-17392184
PRDM6	PCSK2	chr20-17391117-17392184
MEIS2	PCSK2	chr20-17391117-17392184
ONECUT1	PCSK2	chr20-17391117-17392184
ZNF536	PCSK2	chr20-17391117-17392184
TFAP2A	PCSK2	chr20-17399146-17400026
MEIS2	PCSK2	chr20-17399146-17400026
DACH1	PCSK2	chr20-17418222-17419076
ZNF536	PCSK2	chr20-17418222-17419076
PRDM6	PCSK2	chr20-17419270-17420238
MEIS2	PCSK2	chr20-17419270-17420238
PRDM6	PCSK2	chr20-17430215-17431224
PTF1A	PCSK2	chr20-17430215-17431224
PRDM6	PCSK2	chr20-17431440-17432325
EBF1	PCSK2	chr20-17431440-17432325
MEIS2	PCSK2	chr20-17431440-17432325
ONECUT1	PCSK2	chr20-17431440-17432325
ZNF536	PCSK2	chr20-17437502-17438267
PRDM6	PCSK2	chr20-17443130-17443951
EBF1	PCSK2	chr20-17443130-17443951
TFAP2A	PCSK2	chr20-17443130-17443951
PTF1A	PCSK2	chr20-17443130-17443951
MEIS2	PCSK2	chr20-17443130-17443951
KLF7	PCSK2	chr20-17448706-17449653
RARB	PCSK2	chr20-17448706-17449653
PRDM6	PCSK2	chr20-17448706-17449653
TFAP2A	PCSK2	chr20-17448706-17449653
PTF1A	PCSK2	chr20-17448706-17449653
ZNF536	PCSK2	chr20-17448706-17449653
PRDM6	PCSK2	chr20-17452065-17452939
TFAP2A	PCSK2	chr20-17452065-17452939
PTF1A	PCSK2	chr20-17452065-17452939
ZNF536	PCSK2	chr20-17452065-17452939
TFAP2A	PCSK2	chr20-17455751-17456347
HIF1A	PCSK2	chr20-17455751-17456347
ONECUT1	PCSK2	chr20-17455751-17456347
ZNF536	PCSK2	chr20-17456449-17456720
EBF1	PCSK2	chr20-17456803-17457815
TFAP2A	PCSK2	chr20-17456803-17457815
ZNF536	PCSK2	chr20-17456803-17457815
PRDM6	PCSK2	chr20-17466825-17467744
MEIS2	PCSK2	chr20-17466825-17467744
KLF7	PCSK2	chr20-17478849-17479820
PRDM6	PCSK2	chr20-17478849-17479820
EBF1	PCSK2	chr20-17478849-17479820
TFAP2A	PCSK2	chr20-17478849-17479820
MEIS2	PCSK2	chr20-17478849-17479820
LHX9	RRBP1	chr20-17518148-17519233
POU6F2	RRBP1	chr20-17518148-17519233
ZFHX3	RRBP1	chr20-17518148-17519233
ZNF423	RRBP1	chr20-17525323-17526419
ZNF423	RRBP1	chr20-17530463-17530952
TOX	RRBP1	chr20-17533141-17534221
ZNF423	RRBP1	chr20-17533141-17534221
TOX	RRBP1	chr20-17536691-17537627
ZNF423	RRBP1	chr20-17536691-17537627
MEIS2	RRBP1	chr20-17538532-17539323
ZNF423	RRBP1	chr20-17538532-17539323
TCF4	RRBP1	chr20-17538532-17539323
TOX	RRBP1	chr20-17568872-17569170
ZNF423	RRBP1	chr20-17569221-17569862
LHX9	RRBP1	chr20-17570212-17571478
ZFHX3	RRBP1	chr20-17570212-17571478
ZNF423	RRBP1	chr20-17610929-17611912
TCF4	RRBP1	chr20-17610929-17611912
ZNF423	RRBP1	chr20-17612465-17612856
TCF4	RRBP1	chr20-17612465-17612856
ZNF423	RRBP1	chr20-17614881-17615430
NFIA	RRBP1	chr20-17617206-17618156
ZNF423	RRBP1	chr20-17617206-17618156
TCF4	RRBP1	chr20-17617206-17618156
ZNF423	RRBP1	chr20-17624959-17625511
TCF4	RRBP1	chr20-17624959-17625511
ZNF423	RRBP1	chr20-17635153-17635545
TCF4	RRBP1	chr20-17635153-17635545
TOX	RRBP1	chr20-17635665-17636576
NFIA	RRBP1	chr20-17643351-17644822
MEIS2	RRBP1	chr20-17643351-17644822
ZNF423	RRBP1	chr20-17643351-17644822
TCF4	RRBP1	chr20-17643351-17644822
PBX1	RRBP1	chr20-17645956-17649711
TOX	RRBP1	chr20-17645956-17649711
MEIS2	RRBP1	chr20-17645956-17649711
ZNF423	RRBP1	chr20-17645956-17649711
TCF4	RRBP1	chr20-17645956-17649711
ZNF423	RRBP1	chr20-17656838-17657745
NFIA	RRBP1	chr20-17660551-17661393
ZNF423	RRBP1	chr20-17660551-17661393
LHX9	RRBP1	chr20-17667998-17668931
POU6F2	RRBP1	chr20-17667998-17668931
ZNF423	RRBP1	chr20-17667998-17668931
TCF4	RRBP1	chr20-17667998-17668931
NFIA	RRBP1	chr20-17680102-17682027
TOX	RRBP1	chr20-17682296-17683303
ZFHX3	RRBP1	chr20-17682296-17683303
MEIS2	RRBP1	chr20-17684591-17685321
ZNF423	RRBP1	chr20-17684591-17685321
POU6F2	RRBP1	chr20-17693296-17693671
TOX	RRBP1	chr20-17721832-17722525
MEIS2	RRBP1	chr20-17721832-17722525
ZNF423	RRBP1	chr20-17721832-17722525
TCF4	RRBP1	chr20-17724829-17725022
ZNF423	RRBP1	chr20-17725152-17725831
ZNF423	RRBP1	chr20-17742452-17743123
ZNF423	RRBP1	chr20-17747132-17748119
POU6F2	RRBP1	chr20-17761476-17762391
TOX	RRBP1	chr20-17761476-17762391
MEIS2	RRBP1	chr20-17761476-17762391
TOX	RRBP1	chr20-17771184-17772134
EBF1	SLC24A3	chr20-19131138-19132105
ZFPM2	SLC24A3	chr20-19131138-19132105
EBF3	SLC24A3	chr20-19131138-19132105
MEIS2	SLC24A3	chr20-19131138-19132105
ST18	SLC24A3	chr20-19205748-19206669
SOX11	SLC24A3	chr20-19211265-19212645
KLF7	SLC24A3	chr20-19211265-19212645
SOX2	SLC24A3	chr20-19211265-19212645
EBF1	SLC24A3	chr20-19211265-19212645
TFAP2B	SLC24A3	chr20-19211265-19212645
GLI3	SLC24A3	chr20-19211265-19212645
TOX	SLC24A3	chr20-19211265-19212645
ZFPM2	SLC24A3	chr20-19211265-19212645
NFIB	SLC24A3	chr20-19211265-19212645
TCF4	SLC24A3	chr20-19211265-19212645
HES6	SLC24A3	chr20-19212985-19213595
HEYL	SLC24A3	chr20-19216481-19217284
TOX	SLC24A3	chr20-19216481-19217284
TCF7L2	SLC24A3	chr20-19216481-19217284
MEIS2	SLC24A3	chr20-19216481-19217284
NFIA	SLC24A3	chr20-19249630-19250420
MYB	SLC24A3	chr20-19249630-19250420
MEIS2	SLC24A3	chr20-19249630-19250420
TFAP2B	SLC24A3	chr20-19275402-19276370
NFIB	SLC24A3	chr20-19275402-19276370
ZFHX3	SLC24A3	chr20-19275402-19276370
NFIX	SLC24A3	chr20-19275402-19276370
NFIA	SLC24A3	chr20-19317238-19318173
SOX11	SLC24A3	chr20-19317238-19318173
KLF7	SLC24A3	chr20-19317238-19318173
TFAP2B	SLC24A3	chr20-19317238-19318173
ZFPM2	SLC24A3	chr20-19317238-19318173
SOX11	SLC24A3	chr20-19319618-19320728
TOX	SLC24A3	chr20-19319618-19320728
ZFPM2	SLC24A3	chr20-19319618-19320728
NFIB	SLC24A3	chr20-19319618-19320728
FOXO1	SLC24A3	chr20-19319618-19320728
NFIX	SLC24A3	chr20-19319618-19320728
EBF1	SLC24A3	chr20-19333307-19334151
GLI3	SLC24A3	chr20-19333307-19334151
TOX	SLC24A3	chr20-19333307-19334151
TCF7L2	SLC24A3	chr20-19333307-19334151
FOXO1	SLC24A3	chr20-19333307-19334151
TCF4	SLC24A3	chr20-19333307-19334151
POU2F2	SLC24A3	chr20-19333307-19334151
EBF1	SLC24A3	chr20-19338660-19339505
EBF3	SLC24A3	chr20-19338660-19339505
POU2F2	SLC24A3	chr20-19338660-19339505
SATB2	SLC24A3	chr20-19347805-19348754
ZFPM2	SLC24A3	chr20-19347805-19348754
SATB2	SLC24A3	chr20-19361790-19362690
TFAP2B	SLC24A3	chr20-19361790-19362690
GLI3	SLC24A3	chr20-19361790-19362690
ZFPM2	SLC24A3	chr20-19361790-19362690
MEIS2	SLC24A3	chr20-19361790-19362690
TCF4	SLC24A3	chr20-19361790-19362690
RAX	SLC24A3	chr20-19361790-19362690
SATB2	SLC24A3	chr20-19368052-19368967
KLF7	SLC24A3	chr20-19368052-19368967
MYB	SLC24A3	chr20-19368052-19368967
TOX	SLC24A3	chr20-19368052-19368967
TCF7L2	SLC24A3	chr20-19368052-19368967
EBF3	SLC24A3	chr20-19368052-19368967
NFIB	SLC24A3	chr20-19370015-19370826
TEAD1	SLC24A3	chr20-19370015-19370826
FOXO1	SLC24A3	chr20-19370015-19370826
NFIX	SLC24A3	chr20-19370015-19370826
TFAP2B	SLC24A3	chr20-19375039-19375805
ZFPM2	SLC24A3	chr20-19375039-19375805
SOX11	SLC24A3	chr20-19376261-19377486
SOX2	SLC24A3	chr20-19376261-19377486
MYB	SLC24A3	chr20-19376261-19377486
GLI3	SLC24A3	chr20-19376261-19377486
FOXO1	SLC24A3	chr20-19376261-19377486
MEIS2	SLC24A3	chr20-19376261-19377486
ZFHX3	SLC24A3	chr20-19376261-19377486
TCF4	SLC24A3	chr20-19376261-19377486
POU2F2	SLC24A3	chr20-19376261-19377486
HES4	SLC24A3	chr20-19381668-19384079
HES5	SLC24A3	chr20-19381668-19384079
HEYL	SLC24A3	chr20-19381668-19384079
SOX11	SLC24A3	chr20-19381668-19384079
SATB2	SLC24A3	chr20-19381668-19384079
HES6	SLC24A3	chr20-19381668-19384079
TFAP2B	SLC24A3	chr20-19381668-19384079
MYB	SLC24A3	chr20-19381668-19384079
TOX	SLC24A3	chr20-19381668-19384079
ZFPM2	SLC24A3	chr20-19381668-19384079
FOXO1	SLC24A3	chr20-19381668-19384079
MEIS2	SLC24A3	chr20-19381668-19384079
POU2F2	SLC24A3	chr20-19381668-19384079
PBX1	SLC24A3	chr20-19385105-19386066
SOX11	SLC24A3	chr20-19385105-19386066
SATB2	SLC24A3	chr20-19385105-19386066
MYB	SLC24A3	chr20-19385105-19386066
TOX	SLC24A3	chr20-19385105-19386066
TCF7L2	SLC24A3	chr20-19385105-19386066
ZFHX3	SLC24A3	chr20-19385105-19386066
TCF4	SLC24A3	chr20-19385105-19386066
RAX	SLC24A3	chr20-19385105-19386066
NFIX	SLC24A3	chr20-19385105-19386066
SOX11	SLC24A3	chr20-19390222-19390613
GLI3	SLC24A3	chr20-19390222-19390613
TOX	SLC24A3	chr20-19390222-19390613
ZFPM2	SLC24A3	chr20-19390222-19390613
NFIB	SLC24A3	chr20-19390222-19390613
ZFPM2	SLC24A3	chr20-19396389-19397315
FOXO1	SLC24A3	chr20-19396389-19397315
MEIS2	SLC24A3	chr20-19396389-19397315
POU2F2	SLC24A3	chr20-19396389-19397315
SATB2	SLC24A3	chr20-19427251-19428086
KLF7	SLC24A3	chr20-19427251-19428086
POU2F2	SLC24A3	chr20-19427251-19428086
SOX11	SLC24A3	chr20-19429404-19430407
SATB2	SLC24A3	chr20-19429404-19430407
KLF7	SLC24A3	chr20-19429404-19430407
EBF1	SLC24A3	chr20-19429404-19430407
ZFPM2	SLC24A3	chr20-19429404-19430407
EBF3	SLC24A3	chr20-19429404-19430407
FOXO1	SLC24A3	chr20-19429404-19430407
MEIS2	SLC24A3	chr20-19429404-19430407
TCF4	SLC24A3	chr20-19429404-19430407
HEYL	SLC24A3	chr20-19430445-19431367
EBF1	SLC24A3	chr20-19430445-19431367
TOX	SLC24A3	chr20-19430445-19431367
TCF7L2	SLC24A3	chr20-19430445-19431367
EBF3	SLC24A3	chr20-19430445-19431367
HIF1A	SLC24A3	chr20-19430445-19431367
TFAP2B	SLC24A3	chr20-19440555-19441458
ZFPM2	SLC24A3	chr20-19440555-19441458
EBF1	SLC24A3	chr20-19448829-19449591
ZFPM2	SLC24A3	chr20-19448829-19449591
NFIB	SLC24A3	chr20-19448829-19449591
MEIS2	SLC24A3	chr20-19448829-19449591
NFIX	SLC24A3	chr20-19448829-19449591
SOX11	SLC24A3	chr20-19453554-19454452
FOXO1	SLC24A3	chr20-19453554-19454452
HES5	SLC24A3	chr20-19456395-19457126
SATB2	SLC24A3	chr20-19456395-19457126
GLI3	SLC24A3	chr20-19456395-19457126
ZFPM2	SLC24A3	chr20-19456395-19457126
EBF3	SLC24A3	chr20-19456395-19457126
HES4	SLC24A3	chr20-19457373-19458326
HEYL	SLC24A3	chr20-19457373-19458326
HES6	SLC24A3	chr20-19457373-19458326
EBF1	SLC24A3	chr20-19457373-19458326
TFAP2B	SLC24A3	chr20-19457373-19458326
ZFPM2	SLC24A3	chr20-19457373-19458326
MEIS2	SLC24A3	chr20-19457373-19458326
MYB	SLC24A3	chr20-19459913-19460901
ZFPM2	SLC24A3	chr20-19459913-19460901
TCF4	SLC24A3	chr20-19459913-19460901
SOX11	SLC24A3	chr20-19465665-19467316
SATB2	SLC24A3	chr20-19465665-19467316
TFAP2B	SLC24A3	chr20-19465665-19467316
GLI3	SLC24A3	chr20-19465665-19467316
ZFPM2	SLC24A3	chr20-19465665-19467316
NFIB	SLC24A3	chr20-19465665-19467316
MEIS2	SLC24A3	chr20-19465665-19467316
POU2F2	SLC24A3	chr20-19465665-19467316
NFIA	SLC24A3	chr20-19473513-19474533
SOX11	SLC24A3	chr20-19473513-19474533
EBF1	SLC24A3	chr20-19473513-19474533
TFAP2B	SLC24A3	chr20-19473513-19474533
GLI3	SLC24A3	chr20-19473513-19474533
TOX	SLC24A3	chr20-19473513-19474533
TCF7L2	SLC24A3	chr20-19473513-19474533
MEIS2	SLC24A3	chr20-19473513-19474533
SATB2	SLC24A3	chr20-19492658-19493625
ST18	SLC24A3	chr20-19492658-19493625
EBF3	SLC24A3	chr20-19492658-19493625
TFAP2B	SLC24A3	chr20-19501500-19502593
NFIB	SLC24A3	chr20-19501500-19502593
FOXO1	SLC24A3	chr20-19501500-19502593
NFIX	SLC24A3	chr20-19501500-19502593
SATB2	SLC24A3	chr20-19508173-19509151
EBF1	SLC24A3	chr20-19508173-19509151
TFAP2B	SLC24A3	chr20-19508173-19509151
TOX	SLC24A3	chr20-19508173-19509151
TCF7L2	SLC24A3	chr20-19508173-19509151
TCF4	SLC24A3	chr20-19508173-19509151
SOX11	SLC24A3	chr20-19511798-19512669
EBF1	SLC24A3	chr20-19511798-19512669
MYB	SLC24A3	chr20-19511798-19512669
TOX	SLC24A3	chr20-19511798-19512669
ZFPM2	SLC24A3	chr20-19511798-19512669
EBF3	SLC24A3	chr20-19511798-19512669
HES4	SLC24A3	chr20-19512698-19513712
NFIA	SLC24A3	chr20-19512698-19513712
SOX11	SLC24A3	chr20-19512698-19513712
SATB2	SLC24A3	chr20-19512698-19513712
SOX2	SLC24A3	chr20-19512698-19513712
EBF1	SLC24A3	chr20-19512698-19513712
TFAP2B	SLC24A3	chr20-19512698-19513712
TOX	SLC24A3	chr20-19512698-19513712
NFIB	SLC24A3	chr20-19512698-19513712
EBF3	SLC24A3	chr20-19512698-19513712
TCF4	SLC24A3	chr20-19512698-19513712
NFIX	SLC24A3	chr20-19512698-19513712
TFAP2B	SLC24A3	chr20-19519965-19520870
GLI3	SLC24A3	chr20-19519965-19520870
MEIS2	SLC24A3	chr20-19519965-19520870
ZFHX3	SLC24A3	chr20-19519965-19520870
RAX	SLC24A3	chr20-19519965-19520870
SOX11	SLC24A3	chr20-19529791-19530699
TFAP2B	SLC24A3	chr20-19529791-19530699
TOX	SLC24A3	chr20-19529791-19530699
FOXO1	SLC24A3	chr20-19529791-19530699
MEIS2	SLC24A3	chr20-19529791-19530699
TFAP2B	SLC24A3	chr20-19533587-19534223
FOXO1	SLC24A3	chr20-19533587-19534223
SOX11	SLC24A3	chr20-19538877-19539735
SATB2	SLC24A3	chr20-19538877-19539735
MYB	SLC24A3	chr20-19538877-19539735
GLI3	SLC24A3	chr20-19538877-19539735
TOX	SLC24A3	chr20-19538877-19539735
FOXO1	SLC24A3	chr20-19538877-19539735
HEYL	SLC24A3	chr20-19540178-19541089
TOX	SLC24A3	chr20-19540178-19541089
ZFPM2	SLC24A3	chr20-19540178-19541089
TCF7L2	SLC24A3	chr20-19540178-19541089
EBF3	SLC24A3	chr20-19540178-19541089
FOXO1	SLC24A3	chr20-19540178-19541089
SOX11	SLC24A3	chr20-19547235-19548051
TOX	SLC24A3	chr20-19547235-19548051
ZFPM2	SLC24A3	chr20-19547235-19548051
TCF7L2	SLC24A3	chr20-19547235-19548051
MEIS2	SLC24A3	chr20-19547235-19548051
POU2F2	SLC24A3	chr20-19547235-19548051
PBX1	SLC24A3	chr20-19552070-19553175
SOX2	SLC24A3	chr20-19552070-19553175
ZFPM2	SLC24A3	chr20-19552070-19553175
MEIS2	SLC24A3	chr20-19552070-19553175
HES4	SLC24A3	chr20-19560791-19563166
SOX11	SLC24A3	chr20-19560791-19563166
EBF1	SLC24A3	chr20-19560791-19563166
TOX	SLC24A3	chr20-19560791-19563166
ZFPM2	SLC24A3	chr20-19560791-19563166
EBF3	SLC24A3	chr20-19560791-19563166
TEAD1	SLC24A3	chr20-19560791-19563166
MEIS2	SLC24A3	chr20-19560791-19563166
ZFHX3	SLC24A3	chr20-19560791-19563166
NFIX	SLC24A3	chr20-19560791-19563166
POU2F2	SLC24A3	chr20-19560791-19563166
HES4	SLC24A3	chr20-19577834-19578655
EBF1	SLC24A3	chr20-19577834-19578655
MYB	SLC24A3	chr20-19577834-19578655
MEIS2	SLC24A3	chr20-19577834-19578655
KLF7	SLC24A3	chr20-19582445-19584441
EBF1	SLC24A3	chr20-19582445-19584441
ZFPM2	SLC24A3	chr20-19582445-19584441
FOXO1	SLC24A3	chr20-19582445-19584441
MEIS2	SLC24A3	chr20-19582445-19584441
TCF4	SLC24A3	chr20-19582445-19584441
POU2F2	SLC24A3	chr20-19582445-19584441
SOX11	SLC24A3	chr20-19587906-19588803
TOX	SLC24A3	chr20-19587906-19588803
ZFPM2	SLC24A3	chr20-19587906-19588803
TCF7L2	SLC24A3	chr20-19587906-19588803
TEAD1	SLC24A3	chr20-19587906-19588803
FOXO1	SLC24A3	chr20-19587906-19588803
MEIS2	SLC24A3	chr20-19587906-19588803
POU2F2	SLC24A3	chr20-19587906-19588803
PBX1	SLC24A3	chr20-19588921-19589836
SOX11	SLC24A3	chr20-19588921-19589836
EBF1	SLC24A3	chr20-19588921-19589836
TFAP2B	SLC24A3	chr20-19588921-19589836
MYB	SLC24A3	chr20-19588921-19589836
TOX	SLC24A3	chr20-19588921-19589836
ZFPM2	SLC24A3	chr20-19588921-19589836
EBF3	SLC24A3	chr20-19588921-19589836
TEAD1	SLC24A3	chr20-19588921-19589836
FOXO1	SLC24A3	chr20-19588921-19589836
SATB2	SLC24A3	chr20-19605883-19606791
ZFPM2	SLC24A3	chr20-19605883-19606791
POU2F2	SLC24A3	chr20-19605883-19606791
HES4	SLC24A3	chr20-19614390-19615360
SATB2	SLC24A3	chr20-19614390-19615360
TOX	SLC24A3	chr20-19614390-19615360
ZFPM2	SLC24A3	chr20-19614390-19615360
TEAD1	SLC24A3	chr20-19614390-19615360
ZFHX3	SLC24A3	chr20-19614390-19615360
RAX	SLC24A3	chr20-19614390-19615360
NFIA	SLC24A3	chr20-19654458-19655623
SOX11	SLC24A3	chr20-19654458-19655623
TFAP2B	SLC24A3	chr20-19654458-19655623
GLI3	SLC24A3	chr20-19654458-19655623
TOX	SLC24A3	chr20-19654458-19655623
NFIB	SLC24A3	chr20-19654458-19655623
TCF7L2	SLC24A3	chr20-19654458-19655623
FOXO1	SLC24A3	chr20-19654458-19655623
NFIX	SLC24A3	chr20-19654458-19655623
HES5	SLC24A3	chr20-19661843-19662998
HEYL	SLC24A3	chr20-19661843-19662998
HES6	SLC24A3	chr20-19661843-19662998
TFAP2B	SLC24A3	chr20-19661843-19662998
GLI3	SLC24A3	chr20-19661843-19662998
TOX	SLC24A3	chr20-19661843-19662998
TCF7L2	SLC24A3	chr20-19661843-19662998
EBF3	SLC24A3	chr20-19661843-19662998
TFAP2B	SLC24A3	chr20-19667538-19668499
TEAD1	SLC24A3	chr20-19667538-19668499
PBX1	SLC24A3	chr20-19688039-19688982
NFIB	SLC24A3	chr20-19688039-19688982
FOXO1	SLC24A3	chr20-19688039-19688982
ZFHX3	SLC24A3	chr20-19688039-19688982
NFIX	SLC24A3	chr20-19688039-19688982
ST18	SLC24A3	chr20-19692288-19693208
TOX	SLC24A3	chr20-19692288-19693208
ZFPM2	SLC24A3	chr20-19692288-19693208
NFIB	SLC24A3	chr20-19692288-19693208
TCF7L2	SLC24A3	chr20-19692288-19693208
TEAD1	SLC24A3	chr20-19692288-19693208
FOXO1	SLC24A3	chr20-19692288-19693208
NFIX	SLC24A3	chr20-19692288-19693208
POU2F2	SLC24A3	chr20-19692288-19693208
SOX11	SLC24A3	chr20-19704249-19705915
TOX	SLC24A3	chr20-19704249-19705915
EBF3	SLC24A3	chr20-19704249-19705915
SOX11	SLC24A3	chr20-19710042-19711136
TFAP2B	SLC24A3	chr20-19710042-19711136
TOX	SLC24A3	chr20-19710042-19711136
TCF7L2	SLC24A3	chr20-19710042-19711136
FOXO1	SLC24A3	chr20-19710042-19711136
POU2F2	SLC24A3	chr20-19710042-19711136
HEYL	SLC24A3	chr20-19712576-19713684
PROX1	SLC24A3	chr20-19712576-19713684
TFAP2B	SLC24A3	chr20-19712576-19713684
TOX	SLC24A3	chr20-19712576-19713684
TCF7L2	SLC24A3	chr20-19712576-19713684
POU2F2	SLC24A3	chr20-19712576-19713684
TOX	SLC24A3	chr20-19719034-19720161
ZFPM2	SLC24A3	chr20-19719034-19720161
TCF7L2	SLC24A3	chr20-19719034-19720161
TCF4	SLC24A3	chr20-19719034-19720161
RAX	SLC24A3	chr20-19719034-19720161
POU6F2	RIN2	chr20-19786048-19786982
DACH1	RIN2	chr20-19786048-19786982
DACH1	RIN2	chr20-19827982-19828954
TCF7L2	RIN2	chr20-19831738-19833354
TCF4	RIN2	chr20-19831738-19833354
ONECUT1	RIN2	chr20-19836836-19837679
ONECUT2	RIN2	chr20-19836836-19837679
TCF7L2	RIN2	chr20-19851397-19852392
DACH1	RIN2	chr20-19851397-19852392
ONECUT1	RIN2	chr20-19851397-19852392
FOXP2	RIN2	chr20-19867921-19868884
POU6F2	RIN2	chr20-19884212-19886520
FOXP2	RIN2	chr20-19884212-19886520
ONECUT1	RIN2	chr20-19884212-19886520
TCF4	RIN2	chr20-19884212-19886520
FOXP2	RIN2	chr20-19887911-19889374
POU6F2	RIN2	chr20-19889659-19891326
TCF7L2	RIN2	chr20-19918628-19919600
TCF4	RIN2	chr20-19918628-19919600
FOXP2	RIN2	chr20-19920087-19920927
TCF4	RIN2	chr20-19920087-19920927
FOXP2	RIN2	chr20-19942621-19943527
POU6F2	RIN2	chr20-19960812-19961725
TCF7L2	RIN2	chr20-19960812-19961725
FOXP2	RIN2	chr20-19968223-19969252
TCF7L2	RIN2	chr20-19968223-19969252
DACH1	RIN2	chr20-19973781-19974653
ONECUT1	RIN2	chr20-19973781-19974653
FOXP2	RIN2	chr20-19975788-19977730
TCF7L2	RIN2	chr20-19975788-19977730
TCF4	RIN2	chr20-19975788-19977730
TCF7L2	RIN2	chr20-19986647-19987538
POU6F2	RIN2	chr20-19990364-19992142
FOXP2	RIN2	chr20-19990364-19992142
POU6F2	RIN2	chr20-19994836-19995826
GLI3	KIZ	chr20-21096019-21097388
GLI3	KIZ	chr20-21099320-21101383
LHX9	KIZ	chr20-21165105-21166019
GLI3	KIZ	chr20-21189392-21191050
GLI3	KIZ	chr20-21220388-21221380
GLI3	KIZ	chr20-21234331-21236456
TOX	SYNDIG1	chr20-24372842-24374021
POU2F2	SYNDIG1	chr20-24372842-24374021
PROX1	SYNDIG1	chr20-24374072-24374729
NFIB	SYNDIG1	chr20-24374072-24374729
TEAD1	SYNDIG1	chr20-24374072-24374729
NFIX	SYNDIG1	chr20-24374072-24374729
NFIA	SYNDIG1	chr20-24378110-24379292
POU6F2	SYNDIG1	chr20-24378110-24379292
ZFHX3	SYNDIG1	chr20-24378110-24379292
POU2F2	SYNDIG1	chr20-24378110-24379292
TOX	SYNDIG1	chr20-24381722-24384511
NFIB	SYNDIG1	chr20-24381722-24384511
TEAD1	SYNDIG1	chr20-24381722-24384511
MEIS2	SYNDIG1	chr20-24381722-24384511
ZNF423	SYNDIG1	chr20-24381722-24384511
TCF4	SYNDIG1	chr20-24381722-24384511
NFIX	SYNDIG1	chr20-24381722-24384511
POU2F2	SYNDIG1	chr20-24381722-24384511
TEAD1	SYNDIG1	chr20-24392806-24393577
NFIA	SYNDIG1	chr20-24401994-24402875
MEIS2	SYNDIG1	chr20-24401994-24402875
ZNF423	SYNDIG1	chr20-24401994-24402875
TCF4	SYNDIG1	chr20-24401994-24402875
NFIX	SYNDIG1	chr20-24401994-24402875
NFIB	SYNDIG1	chr20-24420319-24421236
MEIS2	SYNDIG1	chr20-24420319-24421236
ZNF423	SYNDIG1	chr20-24420319-24421236
TCF4	SYNDIG1	chr20-24420319-24421236
NFIX	SYNDIG1	chr20-24420319-24421236
KLF7	SYNDIG1	chr20-24422117-24422945
ZNF423	SYNDIG1	chr20-24423110-24424052
POU2F2	SYNDIG1	chr20-24423110-24424052
TOX	SYNDIG1	chr20-24424811-24425694
ZNF423	SYNDIG1	chr20-24424811-24425694
POU2F2	SYNDIG1	chr20-24424811-24425694
TEAD1	SYNDIG1	chr20-24430117-24431047
ZNF423	SYNDIG1	chr20-24430117-24431047
TCF4	SYNDIG1	chr20-24430117-24431047
ZNF423	SYNDIG1	chr20-24439566-24440618
TCF4	SYNDIG1	chr20-24439566-24440618
PBX1	SYNDIG1	chr20-24441408-24442355
POU6F2	SYNDIG1	chr20-24441408-24442355
TOX	SYNDIG1	chr20-24441408-24442355
ZNF423	SYNDIG1	chr20-24441408-24442355
POU6F2	SYNDIG1	chr20-24445186-24446981
ZNF423	SYNDIG1	chr20-24445186-24446981
TCF4	SYNDIG1	chr20-24445186-24446981
TOX	SYNDIG1	chr20-24450362-24451253
NFIX	SYNDIG1	chr20-24451321-24452338
KLF7	SYNDIG1	chr20-24452551-24453359
TOX	SYNDIG1	chr20-24452551-24453359
ZNF423	SYNDIG1	chr20-24452551-24453359
TCF4	SYNDIG1	chr20-24452551-24453359
ZNF423	SYNDIG1	chr20-24455453-24456570
POU2F2	SYNDIG1	chr20-24455453-24456570
KLF7	SYNDIG1	chr20-24458194-24459146
NFIB	SYNDIG1	chr20-24458194-24459146
TEAD1	SYNDIG1	chr20-24459634-24460444
ZNF423	SYNDIG1	chr20-24459634-24460444
TCF4	SYNDIG1	chr20-24459634-24460444
PBX1	SYNDIG1	chr20-24462081-24462952
TOX	SYNDIG1	chr20-24462081-24462952
ZNF423	SYNDIG1	chr20-24462081-24462952
NFIB	SYNDIG1	chr20-24464868-24466393
ZNF423	SYNDIG1	chr20-24464868-24466393
NFIX	SYNDIG1	chr20-24464868-24466393
POU2F2	SYNDIG1	chr20-24464868-24466393
TEAD1	SYNDIG1	chr20-24467727-24467910
KLF7	SYNDIG1	chr20-24468505-24469198
ZNF423	SYNDIG1	chr20-24468505-24469198
LHX9	SYNDIG1	chr20-24469754-24471879
POU6F2	SYNDIG1	chr20-24469754-24471879
ZFHX3	SYNDIG1	chr20-24469754-24471879
TCF4	SYNDIG1	chr20-24469754-24471879
NFIX	SYNDIG1	chr20-24469754-24471879
ZNF423	SYNDIG1	chr20-24479294-24480338
TCF4	SYNDIG1	chr20-24479294-24480338
NFIX	SYNDIG1	chr20-24479294-24480338
TOX	SYNDIG1	chr20-24483291-24484282
NFIB	SYNDIG1	chr20-24483291-24484282
ZNF423	SYNDIG1	chr20-24483291-24484282
TCF4	SYNDIG1	chr20-24483291-24484282
NFIX	SYNDIG1	chr20-24483291-24484282
PROX1	SYNDIG1	chr20-24490694-24491684
TOX	SYNDIG1	chr20-24490694-24491684
MEIS2	SYNDIG1	chr20-24490694-24491684
TCF4	SYNDIG1	chr20-24490694-24491684
NFIB	SYNDIG1	chr20-24492005-24492944
TEAD1	SYNDIG1	chr20-24492005-24492944
ZNF423	SYNDIG1	chr20-24492005-24492944
TCF4	SYNDIG1	chr20-24492005-24492944
PROX1	SYNDIG1	chr20-24501868-24503841
TOX	SYNDIG1	chr20-24501868-24503841
NFIB	SYNDIG1	chr20-24501868-24503841
ZNF423	SYNDIG1	chr20-24501868-24503841
NFIX	SYNDIG1	chr20-24501868-24503841
ZNF423	SYNDIG1	chr20-24507243-24508013
TCF4	SYNDIG1	chr20-24507243-24508013
NFIB	SYNDIG1	chr20-24523543-24524350
TEAD1	SYNDIG1	chr20-24523543-24524350
NFIX	SYNDIG1	chr20-24523543-24524350
CUX2	SYNDIG1	chr20-24528180-24529086
NFIX	SYNDIG1	chr20-24528180-24529086
POU2F2	SYNDIG1	chr20-24528180-24529086
NFIA	SYNDIG1	chr20-24531435-24532387
POU6F2	SYNDIG1	chr20-24531435-24532387
TOX	SYNDIG1	chr20-24531435-24532387
ZNF423	SYNDIG1	chr20-24531435-24532387
TCF4	SYNDIG1	chr20-24531435-24532387
POU2F2	SYNDIG1	chr20-24531435-24532387
ZNF423	SYNDIG1	chr20-24542228-24543019
TCF4	SYNDIG1	chr20-24542228-24543019
NFIX	SYNDIG1	chr20-24542228-24543019
PROX1	SYNDIG1	chr20-24587098-24588041
TOX	SYNDIG1	chr20-24587098-24588041
ZNF423	SYNDIG1	chr20-24587098-24588041
KLF7	SYNDIG1	chr20-24588672-24591177
NFIB	SYNDIG1	chr20-24588672-24591177
ZNF423	SYNDIG1	chr20-24588672-24591177
ZFHX3	SYNDIG1	chr20-24588672-24591177
TCF4	SYNDIG1	chr20-24588672-24591177
POU2F2	SYNDIG1	chr20-24588672-24591177
NFIA	SYNDIG1	chr20-24609065-24610067
ZNF423	SYNDIG1	chr20-24616358-24617260
TCF4	SYNDIG1	chr20-24616358-24617260
ZNF423	SYNDIG1	chr20-24617526-24618575
NFIX	SYNDIG1	chr20-24617526-24618575
PBX1	SYNDIG1	chr20-24627906-24628467
[truncated: 243,299+ more rows]

## Sheet: BC GRN
tf	target	region
DMBX1	PLCB1	chr20-7976793-7977347
SKOR2	PLCB1	chr20-8012440-8013369
HES1	PLCB1	chr20-8019830-8020810
GLI3	PLCB1	chr20-8027167-8028108
CREB5	PLCB1	chr20-8037983-8039061
ETV5	PLCB1	chr20-8065170-8066028
RARB	PLCB1	chr20-8092732-8093599
RARB	PLCB1	chr20-8115957-8117494
NFIB	PLCB1	chr20-8115957-8117494
ETV5	PLCB1	chr20-8144461-8145365
GLI3	PLCB1	chr20-8297514-8298352
DMBX1	PLCB1	chr20-8304030-8305117
GLIS3	PLCB1	chr20-8304030-8305117
ETV5	PLCB1	chr20-8305374-8305673
DMBX1	PLCB1	chr20-8305934-8306365
GLI3	PLCB1	chr20-8305934-8306365
DMBX1	PLCB1	chr20-8306748-8307749
HES1	PLCB1	chr20-8306748-8307749
GLIS3	PLCB1	chr20-8306748-8307749
DMBX1	PLCB1	chr20-8309246-8310162
NFIB	PLCB1	chr20-8414587-8415505
DMBX1	PLCB1	chr20-8469860-8470726
CREB5	PLCB1	chr20-8473244-8474235
SKOR2	PLCB1	chr20-8473244-8474235
DMBX1	PLCB1	chr20-8526238-8527274
GLI3	PLCB1	chr20-8572158-8573128
SKOR2	PLCB1	chr20-8602128-8602988
RARB	PLCB1	chr20-8663349-8663785
DMBX1	PLCB1	chr20-8670695-8671485
CREB5	PLCB1	chr20-8709546-8710421
SKOR2	PLCB1	chr20-8720803-8721679
CREB5	PLCB1	chr20-8753317-8754346
CREB5	PLCB1	chr20-8790262-8791117
ETV5	PLCB1	chr20-8823822-8824755
GLI3	PLCB1	chr20-8853493-8854876
NFIB	PLCB1	chr20-8858031-8859051
CREB5	PLCB1	chr20-8861912-8862866
DMBX1	PLCB1	chr20-8866786-8867913
RARB	PLCB1	chr20-8866786-8867913
NFIB	PLCB1	chr20-8877058-8877950
NFIB	PLCB1	chr20-8888943-8889834
DMBX1	PLCB1	chr20-8941219-8942095
SKOR2	PLCB1	chr20-8941219-8942095
DMBX1	PLCB1	chr20-8946223-8947161
ID2	LAMP5	chr20-9430338-9431227
RARB	LAMP5	chr20-9430338-9431227
RARB	LAMP5	chr20-9467643-9468570
GLI3	LAMP5	chr20-9467643-9468570
ID2	LAMP5	chr20-9506226-9509295
SOX2	LAMP5	chr20-9506226-9509295
ETV5	LAMP5	chr20-9506226-9509295
HES1	LAMP5	chr20-9506226-9509295
EGR1	LAMP5	chr20-9506226-9509295
GLI3	LAMP5	chr20-9506226-9509295
GLIS3	LAMP5	chr20-9506226-9509295
EGR1	LAMP5	chr20-9515626-9515999
EGR1	LAMP5	chr20-9518810-9519116
ID2	LAMP5	chr20-9520006-9521417
TCF7L2	BTBD3	chr20-11791199-11791923
NR2E1	BTBD3	chr20-11792263-11793250
FOXP2	BTBD3	chr20-11792263-11793250
TCF7L2	BTBD3	chr20-11792263-11793250
TOX3	BTBD3	chr20-11792263-11793250
NR2E1	BTBD3	chr20-11798847-11799844
RORB	BTBD3	chr20-11798847-11799844
PAX6	BTBD3	chr20-11798847-11799844
TOX3	BTBD3	chr20-11798847-11799844
HES1	BTBD3	chr20-11890955-11891326
NR2E1	BTBD3	chr20-11891448-11892492
TOX3	BTBD3	chr20-11891448-11892492
RAX	BTBD3	chr20-11891448-11892492
ZBTB18	BTBD3	chr20-11892544-11892913
NR2E1	BTBD3	chr20-11893756-11894630
TCF7L1	BTBD3	chr20-11906752-11907636
PRDM1	BTBD3	chr20-11906752-11907636
MYB	BTBD3	chr20-11906752-11907636
TEAD1	BTBD3	chr20-11906752-11907636
TOX3	BTBD3	chr20-11906752-11907636
ZBTB18	BTBD3	chr20-11911871-11912843
TCF7L1	BTBD3	chr20-11911871-11912843
ETV5	BTBD3	chr20-11911871-11912843
RREB1	BTBD3	chr20-11911871-11912843
NR2E1	BTBD3	chr20-11911871-11912843
RORB	BTBD3	chr20-11911871-11912843
TOX3	BTBD3	chr20-11911871-11912843
ID2	BTBD3	chr20-11915866-11916737
PRDM1	BTBD3	chr20-11915866-11916737
RORB	BTBD3	chr20-11915866-11916737
CUX2	BTBD3	chr20-11915866-11916737
DACH1	BTBD3	chr20-11915866-11916737
ZFHX3	BTBD3	chr20-11915866-11916737
RAX	BTBD3	chr20-11915866-11916737
RAX	BTBD3	chr20-11917395-11917777
ZBTB18	BTBD3	chr20-11918602-11918809
TCF7L1	BTBD3	chr20-11918602-11918809
DACH1	BTBD3	chr20-11918602-11918809
TOX3	BTBD3	chr20-11918602-11918809
CUX2	BTBD3	chr20-11921044-11921565
ID2	SPTLC3	chr20-12916720-12917920
FOS	SPTLC3	chr20-12916720-12917920
ID2	SPTLC3	chr20-12918625-12919524
NR2E1	SPTLC3	chr20-12918625-12919524
FOXP2	SPTLC3	chr20-12918625-12919524
NFIB	SPTLC3	chr20-12918625-12919524
TCF7L1	SPTLC3	chr20-12923459-12924731
SOX2	SPTLC3	chr20-12923459-12924731
RREB1	SPTLC3	chr20-12923459-12924731
CREB5	SPTLC3	chr20-12923459-12924731
FOS	SPTLC3	chr20-12923459-12924731
TOX3	SPTLC3	chr20-12923459-12924731
NR2E1	SPTLC3	chr20-12951108-12951450
RARB	SPTLC3	chr20-12960608-12961531
SMAD6	SPTLC3	chr20-12960608-12961531
TOX3	SPTLC3	chr20-12960608-12961531
ZBTB18	SPTLC3	chr20-12965134-12967535
FOXP2	SPTLC3	chr20-12965134-12967535
RORB	SPTLC3	chr20-12965134-12967535
PAX6	SPTLC3	chr20-12965134-12967535
NR4A1	SPTLC3	chr20-12965134-12967535
DACH1	SPTLC3	chr20-12965134-12967535
ID2	SPTLC3	chr20-12969956-12971071
CREB5	SPTLC3	chr20-12969956-12971071
MEIS1	SPTLC3	chr20-13003220-13004183
ID2	SPTLC3	chr20-13008432-13008978
NR2E1	SPTLC3	chr20-13009494-13010495
CREB5	SPTLC3	chr20-13009494-13010495
FOXP2	SPTLC3	chr20-13009494-13010495
NFIB	SPTLC3	chr20-13009494-13010495
TCF7L2	SPTLC3	chr20-13009494-13010495
FOS	SPTLC3	chr20-13009494-13010495
TOX3	SPTLC3	chr20-13009494-13010495
HES5	SPTLC3	chr20-13041560-13042535
ID2	SPTLC3	chr20-13041560-13042535
MEIS1	SPTLC3	chr20-13041560-13042535
TCF7L1	SPTLC3	chr20-13041560-13042535
EGR1	SPTLC3	chr20-13041560-13042535
NR2E1	SPTLC3	chr20-13041560-13042535
FOS	SPTLC3	chr20-13041560-13042535
TOX3	SPTLC3	chr20-13041560-13042535
RREB1	SPTLC3	chr20-13096851-13097722
NFIB	SPTLC3	chr20-13096851-13097722
ID2	SPTLC3	chr20-13103602-13104557
MEIS1	SPTLC3	chr20-13103602-13104557
RREB1	SPTLC3	chr20-13103602-13104557
RREB1	SPTLC3	chr20-13105818-13106718
TCF7L2	SPTLC3	chr20-13105818-13106718
ID2	SPTLC3	chr20-13110648-13111514
NFIB	SPTLC3	chr20-13110648-13111514
MEIS1	SPTLC3	chr20-13115331-13116643
RREB1	SPTLC3	chr20-13115331-13116643
NR2E1	SPTLC3	chr20-13115331-13116643
PAX6	SPTLC3	chr20-13115331-13116643
NR4A1	SPTLC3	chr20-13115331-13116643
FOXP2	SPTLC3	chr20-13119244-13120179
PRDM8	KIF16B	chr20-16178286-16179319
RREB1	KIF16B	chr20-16178286-16179319
PRDM1	KIF16B	chr20-16178286-16179319
FOXP2	KIF16B	chr20-16178286-16179319
DACH1	KIF16B	chr20-16178286-16179319
MEIS2	KIF16B	chr20-16178286-16179319
ZNF521	KIF16B	chr20-16178286-16179319
FOXP2	KIF16B	chr20-16187469-16188387
ZBTB18	KIF16B	chr20-16189068-16189998
PRDM1	KIF16B	chr20-16189068-16189998
DACH1	KIF16B	chr20-16189068-16189998
PRDM1	KIF16B	chr20-16221340-16222290
ATOH7	KIF16B	chr20-16221340-16222290
TOX3	KIF16B	chr20-16221340-16222290
NFIA	KIF16B	chr20-16225426-16226614
PRDM8	KIF16B	chr20-16225426-16226614
PRDM1	KIF16B	chr20-16225426-16226614
NFIB	KIF16B	chr20-16225426-16226614
ONECUT1	KIF16B	chr20-16225426-16226614
ZNF521	KIF16B	chr20-16225426-16226614
PRDM8	KIF16B	chr20-16236618-16237711
RREB1	KIF16B	chr20-16236618-16237711
ONECUT1	KIF16B	chr20-16236618-16237711
TOX3	KIF16B	chr20-16236618-16237711
ZNF521	KIF16B	chr20-16236618-16237711
RREB1	KIF16B	chr20-16241610-16242502
ZNF521	KIF16B	chr20-16241610-16242502
ZBTB18	KIF16B	chr20-16243189-16244158
PRDM1	KIF16B	chr20-16243189-16244158
NFIB	KIF16B	chr20-16243189-16244158
DACH1	KIF16B	chr20-16243189-16244158
ONECUT1	KIF16B	chr20-16244843-16245202
PRDM8	KIF16B	chr20-16259132-16259747
RREB1	KIF16B	chr20-16259132-16259747
ZNF521	KIF16B	chr20-16259132-16259747
SMAD2	KIF16B	chr20-16259132-16259747
PRDM8	KIF16B	chr20-16260780-16261777
RREB1	KIF16B	chr20-16260780-16261777
RORB	KIF16B	chr20-16260780-16261777
ATOH7	KIF16B	chr20-16260780-16261777
TOX3	KIF16B	chr20-16260780-16261777
ZNF521	KIF16B	chr20-16260780-16261777
NFIA	KIF16B	chr20-16263238-16264224
ZBTB18	KIF16B	chr20-16263238-16264224
PRDM1	KIF16B	chr20-16263238-16264224
RAX	KIF16B	chr20-16263238-16264224
ATOH7	KIF16B	chr20-16271113-16272098
ONECUT1	KIF16B	chr20-16271113-16272098
ZFHX3	KIF16B	chr20-16271113-16272098
RAX	KIF16B	chr20-16271113-16272098
NFIA	KIF16B	chr20-16273554-16274560
NEUROD1	KIF16B	chr20-16273554-16274560
PRDM8	KIF16B	chr20-16273554-16274560
PRDM1	KIF16B	chr20-16273554-16274560
MEIS2	KIF16B	chr20-16273554-16274560
ONECUT1	KIF16B	chr20-16273554-16274560
SMAD2	KIF16B	chr20-16273554-16274560
PRDM8	KIF16B	chr20-16348633-16349405
MEIS2	KIF16B	chr20-16348633-16349405
ZFHX3	KIF16B	chr20-16348633-16349405
ZNF521	KIF16B	chr20-16348633-16349405
RAX	KIF16B	chr20-16348633-16349405
VSX1	KIF16B	chr20-16348633-16349405
NEUROD1	KIF16B	chr20-16349694-16351891
HES6	KIF16B	chr20-16349694-16351891
PRDM8	KIF16B	chr20-16349694-16351891
RREB1	KIF16B	chr20-16349694-16351891
FOXP2	KIF16B	chr20-16349694-16351891
MEIS2	KIF16B	chr20-16349694-16351891
ZNF521	KIF16B	chr20-16349694-16351891
SMAD2	KIF16B	chr20-16349694-16351891
NFIA	KIF16B	chr20-16363465-16364472
ZBTB18	KIF16B	chr20-16363465-16364472
NEUROD1	KIF16B	chr20-16363465-16364472
RREB1	KIF16B	chr20-16363465-16364472
RORB	KIF16B	chr20-16363465-16364472
ATOH7	KIF16B	chr20-16363465-16364472
TOX3	KIF16B	chr20-16363465-16364472
ZNF521	KIF16B	chr20-16363465-16364472
PRDM1	KIF16B	chr20-16366204-16366842
NFIB	KIF16B	chr20-16366204-16366842
DACH1	KIF16B	chr20-16366204-16366842
TOX3	KIF16B	chr20-16366204-16366842
NFIA	KIF16B	chr20-16404187-16404812
PRDM8	KIF16B	chr20-16404902-16405723
RORB	KIF16B	chr20-16404902-16405723
ZFHX3	KIF16B	chr20-16404902-16405723
SMAD2	KIF16B	chr20-16404902-16405723
HES6	KIF16B	chr20-16407056-16407876
DACH1	KIF16B	chr20-16407056-16407876
ONECUT1	KIF16B	chr20-16407056-16407876
TOX3	KIF16B	chr20-16407056-16407876
SMAD2	KIF16B	chr20-16407056-16407876
HES6	KIF16B	chr20-16433516-16434846
RREB1	KIF16B	chr20-16433516-16434846
PRDM1	KIF16B	chr20-16433516-16434846
MEIS2	KIF16B	chr20-16433516-16434846
ONECUT1	KIF16B	chr20-16433516-16434846
ZNF521	KIF16B	chr20-16433516-16434846
NFIA	KIF16B	chr20-16441220-16442239
NEUROD1	KIF16B	chr20-16441220-16442239
TOX3	KIF16B	chr20-16441220-16442239
ZBTB18	KIF16B	chr20-16457253-16458177
DACH1	KIF16B	chr20-16457253-16458177
ZNF521	KIF16B	chr20-16457253-16458177
SMAD2	KIF16B	chr20-16457253-16458177
FOXP2	KIF16B	chr20-16475642-16476571
ZNF521	KIF16B	chr20-16475642-16476571
MEIS2	KIF16B	chr20-16483872-16484860
TOX3	KIF16B	chr20-16483872-16484860
SMAD2	KIF16B	chr20-16483872-16484860
ZBTB18	KIF16B	chr20-16485398-16486237
HES6	KIF16B	chr20-16485398-16486237
FOXP2	KIF16B	chr20-16485398-16486237
DACH1	KIF16B	chr20-16485398-16486237
MEIS2	KIF16B	chr20-16485398-16486237
ONECUT1	KIF16B	chr20-16485398-16486237
ZNF521	KIF16B	chr20-16485398-16486237
NEUROD1	KIF16B	chr20-16487732-16488713
PRDM8	KIF16B	chr20-16487732-16488713
ATOH7	KIF16B	chr20-16487732-16488713
ONECUT1	KIF16B	chr20-16487732-16488713
TOX3	KIF16B	chr20-16487732-16488713
ZBTB18	KIF16B	chr20-16507107-16507940
DACH1	KIF16B	chr20-16507107-16507940
TOX3	KIF16B	chr20-16507107-16507940
ZFHX3	KIF16B	chr20-16507107-16507940
PRDM8	KIF16B	chr20-16508347-16509118
PRDM8	KIF16B	chr20-16512468-16512825
RREB1	KIF16B	chr20-16512468-16512825
ONECUT1	KIF16B	chr20-16512468-16512825
ZNF521	KIF16B	chr20-16512468-16512825
RORB	KIF16B	chr20-16512924-16513315
DACH1	KIF16B	chr20-16512924-16513315
ZBTB18	KIF16B	chr20-16516181-16516912
PRDM8	KIF16B	chr20-16516181-16516912
RREB1	KIF16B	chr20-16516181-16516912
ZNF521	KIF16B	chr20-16516181-16516912
NFIA	KIF16B	chr20-16517943-16518913
RREB1	KIF16B	chr20-16517943-16518913
ONECUT1	KIF16B	chr20-16517943-16518913
TOX3	KIF16B	chr20-16517943-16518913
ZNF521	KIF16B	chr20-16517943-16518913
PRDM8	KIF16B	chr20-16519840-16520849
FOXP2	KIF16B	chr20-16519840-16520849
SMAD2	KIF16B	chr20-16519840-16520849
NEUROD1	KIF16B	chr20-16541121-16542118
PRDM8	KIF16B	chr20-16541121-16542118
RREB1	KIF16B	chr20-16541121-16542118
RORB	KIF16B	chr20-16541121-16542118
ZNF521	KIF16B	chr20-16541121-16542118
SMAD2	KIF16B	chr20-16541121-16542118
NFIA	KIF16B	chr20-16547402-16548868
MEIS2	KIF16B	chr20-16547402-16548868
ZNF521	KIF16B	chr20-16547402-16548868
RAX	KIF16B	chr20-16547402-16548868
PRDM8	KIF16B	chr20-16568423-16569274
PRDM8	KIF16B	chr20-16572796-16573228
MEIS2	KIF16B	chr20-16573435-16576067
ZNF521	KIF16B	chr20-16573435-16576067
SMAD2	KIF16B	chr20-16573435-16576067
ZBTB18	KIF16B	chr20-16577161-16578096
HES6	KIF16B	chr20-16577161-16578096
PRDM8	KIF16B	chr20-16577161-16578096
RREB1	KIF16B	chr20-16577161-16578096
ONECUT1	KIF16B	chr20-16577161-16578096
ZNF521	KIF16B	chr20-16577161-16578096
PRDM8	KIF16B	chr20-16579616-16580257
FOXP2	KIF16B	chr20-16579616-16580257
RORB	KIF16B	chr20-16579616-16580257
ONECUT1	KIF16B	chr20-16579616-16580257
PRDM1	KIF16B	chr20-16607651-16608547
NFIB	KIF16B	chr20-16607651-16608547
TOX3	KIF16B	chr20-16607651-16608547
ZNF521	KIF16B	chr20-16607651-16608547
NFIB	KIF16B	chr20-16614886-16615800
SOX6	KIF16B	chr20-16614886-16615800
DACH1	KIF16B	chr20-16614886-16615800
ONECUT1	KIF16B	chr20-16614886-16615800
TOX3	KIF16B	chr20-16614886-16615800
PRDM8	KIF16B	chr20-16616845-16617814
ONECUT1	KIF16B	chr20-16616845-16617814
ZFHX3	KIF16B	chr20-16616845-16617814
VSX1	KIF16B	chr20-16616845-16617814
SOX6	KIF16B	chr20-16634238-16635130
DACH1	KIF16B	chr20-16634238-16635130
ZBTB18	KIF16B	chr20-16637641-16638416
DACH1	KIF16B	chr20-16637641-16638416
MEIS2	KIF16B	chr20-16637641-16638416
ZBTB18	KIF16B	chr20-16644594-16645503
RAX	KIF16B	chr20-16644594-16645503
PRDM8	KIF16B	chr20-16647607-16648532
MEIS2	KIF16B	chr20-16647607-16648532
NEUROD1	KIF16B	chr20-16663681-16664699
PRDM8	KIF16B	chr20-16663681-16664699
RREB1	KIF16B	chr20-16663681-16664699
DACH1	KIF16B	chr20-16663681-16664699
ONECUT1	KIF16B	chr20-16663681-16664699
ZNF521	KIF16B	chr20-16663681-16664699
NEUROD1	KIF16B	chr20-16671724-16672540
PRDM1	KIF16B	chr20-16671724-16672540
ZNF521	KIF16B	chr20-16671724-16672540
RXRG	PCSK2	chr20-17140377-17141224
RREB1	PCSK2	chr20-17140377-17141224
ZNF521	PCSK2	chr20-17140377-17141224
PRDM1	PCSK2	chr20-17149361-17150873
ZNF83	PCSK2	chr20-17149361-17150873
PROX1	PCSK2	chr20-17158618-17159699
FOXP2	PCSK2	chr20-17158618-17159699
PAX6	PCSK2	chr20-17158618-17159699
SMAD2	PCSK2	chr20-17158618-17159699
ZBTB18	PCSK2	chr20-17161498-17162531
MEIS1	PCSK2	chr20-17161498-17162531
ATOH7	PCSK2	chr20-17161498-17162531
MEIS2	PCSK2	chr20-17161498-17162531
ZNF521	PCSK2	chr20-17161498-17162531
ZNF83	PCSK2	chr20-17161498-17162531
MEIS1	PCSK2	chr20-17169407-17170413
PRDM1	PCSK2	chr20-17169407-17170413
FOXP2	PCSK2	chr20-17169407-17170413
SMAD2	PCSK2	chr20-17169407-17170413
ZBTB18	PCSK2	chr20-17172639-17173629
NEUROD1	PCSK2	chr20-17172639-17173629
ISL1	PCSK2	chr20-17172639-17173629
TCF7L2	PCSK2	chr20-17172639-17173629
TEAD1	PCSK2	chr20-17172639-17173629
ONECUT1	PCSK2	chr20-17172639-17173629
ZFHX3	PCSK2	chr20-17172639-17173629
RAX	PCSK2	chr20-17172639-17173629
ONECUT3	PCSK2	chr20-17172639-17173629
RXRG	PCSK2	chr20-17176878-17177902
MYT1L	PCSK2	chr20-17176878-17177902
PRDM8	PCSK2	chr20-17176878-17177902
ST18	PCSK2	chr20-17176878-17177902
NFIB	PCSK2	chr20-17176878-17177902
RORB	PCSK2	chr20-17176878-17177902
ZNF521	PCSK2	chr20-17176878-17177902
MEIS1	PCSK2	chr20-17179429-17180443
PRDM8	PCSK2	chr20-17179429-17180443
RREB1	PCSK2	chr20-17179429-17180443
NFIB	PCSK2	chr20-17179429-17180443
RORB	PCSK2	chr20-17179429-17180443
MEIS2	PCSK2	chr20-17179429-17180443
ZNF521	PCSK2	chr20-17179429-17180443
MEIS1	PCSK2	chr20-17202451-17203380
PRDM8	PCSK2	chr20-17202451-17203380
RREB1	PCSK2	chr20-17202451-17203380
PRDM1	PCSK2	chr20-17202451-17203380
PAX6	PCSK2	chr20-17202451-17203380
MEIS2	PCSK2	chr20-17202451-17203380
ZNF521	PCSK2	chr20-17202451-17203380
ZNF83	PCSK2	chr20-17202451-17203380
PRDM1	PCSK2	chr20-17222148-17223011
MYB	PCSK2	chr20-17222148-17223011
FOXP2	PCSK2	chr20-17222148-17223011
DACH1	PCSK2	chr20-17222148-17223011
TOX3	PCSK2	chr20-17222148-17223011
ISL1	PCSK2	chr20-17225252-17226106
NFIB	PCSK2	chr20-17225252-17226106
MEIS2	PCSK2	chr20-17225252-17226106
ONECUT3	PCSK2	chr20-17225252-17226106
SOX2	PCSK2	chr20-17226380-17226990
PRDM8	PCSK2	chr20-17226380-17226990
RREB1	PCSK2	chr20-17226380-17226990
PRDM1	PCSK2	chr20-17226380-17226990
ZNF521	PCSK2	chr20-17226380-17226990
ZNF83	PCSK2	chr20-17227483-17228130
MEIS1	PCSK2	chr20-17228303-17229232
GLI2	PCSK2	chr20-17228303-17229232
GLI3	PCSK2	chr20-17228303-17229232
TCF7L2	PCSK2	chr20-17233196-17234189
MEIS2	PCSK2	chr20-17233196-17234189
ONECUT1	PCSK2	chr20-17233196-17234189
ONECUT3	PCSK2	chr20-17233196-17234189
ZBTB18	PCSK2	chr20-17242312-17243389
MEIS1	PCSK2	chr20-17242312-17243389
RARB	PCSK2	chr20-17242312-17243389
PRDM8	PCSK2	chr20-17242312-17243389
PAX6	PCSK2	chr20-17242312-17243389
MEIS2	PCSK2	chr20-17242312-17243389
ONECUT1	PCSK2	chr20-17242312-17243389
ZNF521	PCSK2	chr20-17242312-17243389
ONECUT3	PCSK2	chr20-17242312-17243389
PRDM1	PCSK2	chr20-17248328-17248475
ATOH7	PCSK2	chr20-17248328-17248475
MEIS1	PCSK2	chr20-17266843-17267737
TCF7L1	PCSK2	chr20-17266843-17267737
NEUROD1	PCSK2	chr20-17266843-17267737
PRDM8	PCSK2	chr20-17266843-17267737
MEIS2	PCSK2	chr20-17266843-17267737
TOX3	PCSK2	chr20-17266843-17267737
ZNF83	PCSK2	chr20-17266843-17267737
RXRG	PCSK2	chr20-17270366-17271290
TCF7L1	PCSK2	chr20-17270366-17271290
PRDM1	PCSK2	chr20-17270366-17271290
FOXP2	PCSK2	chr20-17270366-17271290
TCF7L2	PCSK2	chr20-17270366-17271290
TOX3	PCSK2	chr20-17270366-17271290
ZNF521	PCSK2	chr20-17270366-17271290
RAX	PCSK2	chr20-17270366-17271290
RXRG	PCSK2	chr20-17281124-17283222
ZBTB18	PCSK2	chr20-17281124-17283222
TCF7L1	PCSK2	chr20-17281124-17283222
RARB	PCSK2	chr20-17281124-17283222
PRDM8	PCSK2	chr20-17281124-17283222
ISL1	PCSK2	chr20-17281124-17283222
RORB	PCSK2	chr20-17281124-17283222
TCF7L2	PCSK2	chr20-17281124-17283222
CUX2	PCSK2	chr20-17281124-17283222
MEIS2	PCSK2	chr20-17281124-17283222
ONECUT1	PCSK2	chr20-17281124-17283222
TOX3	PCSK2	chr20-17281124-17283222
ZFHX3	PCSK2	chr20-17281124-17283222
ZNF521	PCSK2	chr20-17281124-17283222
RAX	PCSK2	chr20-17281124-17283222
ONECUT3	PCSK2	chr20-17281124-17283222
ZNF83	PCSK2	chr20-17281124-17283222
MEIS1	PCSK2	chr20-17295148-17296462
RREB1	PCSK2	chr20-17295148-17296462
CUX2	PCSK2	chr20-17295148-17296462
MEIS2	PCSK2	chr20-17295148-17296462
ONECUT1	PCSK2	chr20-17295148-17296462
ZFHX3	PCSK2	chr20-17295148-17296462
ZNF521	PCSK2	chr20-17295148-17296462
SMAD2	PCSK2	chr20-17295148-17296462
RAX	PCSK2	chr20-17295148-17296462
ONECUT3	PCSK2	chr20-17295148-17296462
RXRG	PCSK2	chr20-17299789-17300757
NEUROD1	PCSK2	chr20-17299789-17300757
MEIS2	PCSK2	chr20-17299789-17300757
ZNF521	PCSK2	chr20-17299789-17300757
ZNF83	PCSK2	chr20-17299789-17300757
RXRG	PCSK2	chr20-17314007-17317392
MYT1L	PCSK2	chr20-17314007-17317392
GLI2	PCSK2	chr20-17314007-17317392
SOX2	PCSK2	chr20-17314007-17317392
PRDM8	PCSK2	chr20-17314007-17317392
ISL1	PCSK2	chr20-17314007-17317392
RREB1	PCSK2	chr20-17314007-17317392
PRDM1	PCSK2	chr20-17314007-17317392
GLI3	PCSK2	chr20-17314007-17317392
ST18	PCSK2	chr20-17314007-17317392
TCF7L2	PCSK2	chr20-17314007-17317392
PAX6	PCSK2	chr20-17314007-17317392
CUX2	PCSK2	chr20-17314007-17317392
MEIS2	PCSK2	chr20-17314007-17317392
ONECUT1	PCSK2	chr20-17314007-17317392
TOX3	PCSK2	chr20-17314007-17317392
ZNF521	PCSK2	chr20-17314007-17317392
SMAD2	PCSK2	chr20-17314007-17317392
ONECUT3	PCSK2	chr20-17314007-17317392
NEUROD1	PCSK2	chr20-17318610-17318859
RREB1	PCSK2	chr20-17318610-17318859
TCF7L2	PCSK2	chr20-17318610-17318859
ZNF521	PCSK2	chr20-17318610-17318859
PRDM8	PCSK2	chr20-17326764-17328111
RREB1	PCSK2	chr20-17326764-17328111
FOXP2	PCSK2	chr20-17326764-17328111
TEAD1	PCSK2	chr20-17326764-17328111
MEIS2	PCSK2	chr20-17326764-17328111
ZNF521	PCSK2	chr20-17326764-17328111
ZNF83	PCSK2	chr20-17326764-17328111
ZBTB18	PCSK2	chr20-17334391-17335295
PRDM8	PCSK2	chr20-17334391-17335295
MYB	PCSK2	chr20-17334391-17335295
NFIB	PCSK2	chr20-17334391-17335295
RAX	PCSK2	chr20-17334391-17335295
MEIS1	PCSK2	chr20-17341061-17341973
NEUROD1	PCSK2	chr20-17341061-17341973
FOXP2	PCSK2	chr20-17341061-17341973
MEIS2	PCSK2	chr20-17341061-17341973
ONECUT1	PCSK2	chr20-17341061-17341973
ONECUT3	PCSK2	chr20-17341061-17341973
NEUROD1	PCSK2	chr20-17343491-17344607
PRDM8	PCSK2	chr20-17343491-17344607
PRDM1	PCSK2	chr20-17343491-17344607
NFIB	PCSK2	chr20-17343491-17344607
ZNF83	PCSK2	chr20-17343491-17344607
ZBTB18	PCSK2	chr20-17344949-17345660
MYT1L	PCSK2	chr20-17344949-17345660
RREB1	PCSK2	chr20-17344949-17345660
FOXP2	PCSK2	chr20-17344949-17345660
ST18	PCSK2	chr20-17344949-17345660
RORB	PCSK2	chr20-17344949-17345660
ATOH7	PCSK2	chr20-17344949-17345660
ZFHX3	PCSK2	chr20-17344949-17345660
ZNF521	PCSK2	chr20-17344949-17345660
ZBTB18	PCSK2	chr20-17346739-17347763
MEIS2	PCSK2	chr20-17346739-17347763
ONECUT1	PCSK2	chr20-17346739-17347763
TOX3	PCSK2	chr20-17346739-17347763
ONECUT3	PCSK2	chr20-17346739-17347763
ZNF83	PCSK2	chr20-17346739-17347763
RXRG	PCSK2	chr20-17349974-17350976
SOX2	PCSK2	chr20-17349974-17350976
PRDM8	PCSK2	chr20-17349974-17350976
PRDM1	PCSK2	chr20-17349974-17350976
RORB	PCSK2	chr20-17349974-17350976
DACH1	PCSK2	chr20-17349974-17350976
ZFHX3	PCSK2	chr20-17349974-17350976
ZNF521	PCSK2	chr20-17349974-17350976
RAX	PCSK2	chr20-17349974-17350976
PRDM8	PCSK2	chr20-17355368-17356239
RREB1	PCSK2	chr20-17355368-17356239
NFIB	PCSK2	chr20-17355368-17356239
ZNF521	PCSK2	chr20-17355368-17356239
ZNF83	PCSK2	chr20-17355368-17356239
RXRG	PCSK2	chr20-17358441-17359328
MEIS1	PCSK2	chr20-17358441-17359328
SOX2	PCSK2	chr20-17358441-17359328
PRDM8	PCSK2	chr20-17358441-17359328
TEAD1	PCSK2	chr20-17358441-17359328
ONECUT1	PCSK2	chr20-17358441-17359328
TOX3	PCSK2	chr20-17358441-17359328
ONECUT3	PCSK2	chr20-17358441-17359328
GLI2	PCSK2	chr20-17361042-17362003
NEUROD1	PCSK2	chr20-17361042-17362003
PRDM8	PCSK2	chr20-17361042-17362003
ISL1	PCSK2	chr20-17361042-17362003
RREB1	PCSK2	chr20-17361042-17362003
MYB	PCSK2	chr20-17361042-17362003
GLI3	PCSK2	chr20-17361042-17362003
NFIB	PCSK2	chr20-17361042-17362003
RORB	PCSK2	chr20-17361042-17362003
TCF7L2	PCSK2	chr20-17361042-17362003
TOX3	PCSK2	chr20-17361042-17362003
ZNF521	PCSK2	chr20-17361042-17362003
SMAD2	PCSK2	chr20-17361042-17362003
ISL1	PCSK2	chr20-17368554-17369239
PRDM1	PCSK2	chr20-17368554-17369239
NFIB	PCSK2	chr20-17368554-17369239
SMAD2	PCSK2	chr20-17368554-17369239
RREB1	PCSK2	chr20-17369278-17369449
ZNF521	PCSK2	chr20-17369278-17369449
ISL1	PCSK2	chr20-17372755-17373577
RORB	PCSK2	chr20-17372755-17373577
MEIS1	PCSK2	chr20-17377023-17377948
TEAD1	PCSK2	chr20-17377023-17377948
PAX6	PCSK2	chr20-17377023-17377948
CUX2	PCSK2	chr20-17377023-17377948
MEIS2	PCSK2	chr20-17377023-17377948
ONECUT1	PCSK2	chr20-17377023-17377948
PROX1	PCSK2	chr20-17388381-17389238
PRDM1	PCSK2	chr20-17388381-17389238
ONECUT1	PCSK2	chr20-17388381-17389238
ZNF521	PCSK2	chr20-17388381-17389238
ZNF83	PCSK2	chr20-17388381-17389238
RXRG	PCSK2	chr20-17389313-17389764
PRDM1	PCSK2	chr20-17389313-17389764
TEAD1	PCSK2	chr20-17389313-17389764
MEIS1	PCSK2	chr20-17391117-17392184
RARB	PCSK2	chr20-17391117-17392184
PRDM1	PCSK2	chr20-17391117-17392184
MEIS2	PCSK2	chr20-17391117-17392184
ONECUT1	PCSK2	chr20-17391117-17392184
ZNF83	PCSK2	chr20-17391117-17392184
MEIS1	PCSK2	chr20-17399146-17400026
ISL1	PCSK2	chr20-17399146-17400026
TCF7L2	PCSK2	chr20-17399146-17400026
PAX6	PCSK2	chr20-17399146-17400026
MEIS2	PCSK2	chr20-17399146-17400026
PRDM1	PCSK2	chr20-17418222-17419076
NFIB	PCSK2	chr20-17418222-17419076
DACH1	PCSK2	chr20-17418222-17419076
ZNF83	PCSK2	chr20-17418222-17419076
MYT1L	PCSK2	chr20-17419270-17420238
MEIS1	PCSK2	chr20-17419270-17420238
NEUROD1	PCSK2	chr20-17419270-17420238
SOX2	PCSK2	chr20-17419270-17420238
RREB1	PCSK2	chr20-17419270-17420238
ST18	PCSK2	chr20-17419270-17420238
RORB	PCSK2	chr20-17419270-17420238
MEIS2	PCSK2	chr20-17419270-17420238
ZFHX3	PCSK2	chr20-17419270-17420238
ZNF521	PCSK2	chr20-17419270-17420238
ZNF83	PCSK2	chr20-17419270-17420238
ZBTB18	PCSK2	chr20-17430215-17431224
TCF7L1	PCSK2	chr20-17430215-17431224
PRDM8	PCSK2	chr20-17430215-17431224
FOXP2	PCSK2	chr20-17430215-17431224
TOX3	PCSK2	chr20-17430215-17431224
RREB1	PCSK2	chr20-17431440-17432325
MEIS2	PCSK2	chr20-17431440-17432325
ONECUT1	PCSK2	chr20-17431440-17432325
ZFHX3	PCSK2	chr20-17431440-17432325
ZNF521	PCSK2	chr20-17431440-17432325
SMAD2	PCSK2	chr20-17431440-17432325
PRDM8	PCSK2	chr20-17436884-17437202
RXRG	PCSK2	chr20-17437502-17438267
GLI2	PCSK2	chr20-17437502-17438267
PRDM8	PCSK2	chr20-17437502-17438267
GLI3	PCSK2	chr20-17437502-17438267
PROX1	PCSK2	chr20-17443130-17443951
NEUROD1	PCSK2	chr20-17443130-17443951
TCF7L2	PCSK2	chr20-17443130-17443951
MEIS2	PCSK2	chr20-17443130-17443951
ZNF521	PCSK2	chr20-17443130-17443951
RXRG	PCSK2	chr20-17448706-17449653
GLI2	PCSK2	chr20-17448706-17449653
NEUROD1	PCSK2	chr20-17448706-17449653
RARB	PCSK2	chr20-17448706-17449653
PRDM8	PCSK2	chr20-17448706-17449653
GLI3	PCSK2	chr20-17448706-17449653
SMAD2	PCSK2	chr20-17448706-17449653
ZNF83	PCSK2	chr20-17448706-17449653
MYT1L	PCSK2	chr20-17452065-17452939
MEIS1	PCSK2	chr20-17452065-17452939
GLI2	PCSK2	chr20-17452065-17452939
MYB	PCSK2	chr20-17452065-17452939
GLI3	PCSK2	chr20-17452065-17452939
ST18	PCSK2	chr20-17452065-17452939
ZNF521	PCSK2	chr20-17452065-17452939
HES5	PCSK2	chr20-17455751-17456347
HES6	PCSK2	chr20-17455751-17456347
PRDM8	PCSK2	chr20-17455751-17456347
NFIB	PCSK2	chr20-17455751-17456347
ONECUT1	PCSK2	chr20-17455751-17456347
TOX3	PCSK2	chr20-17455751-17456347
ZNF521	PCSK2	chr20-17455751-17456347
TEAD1	PCSK2	chr20-17456449-17456720
RXRG	PCSK2	chr20-17456803-17457815
ZBTB18	PCSK2	chr20-17456803-17457815
MYT1L	PCSK2	chr20-17456803-17457815
MEIS1	PCSK2	chr20-17456803-17457815
GLI2	PCSK2	chr20-17456803-17457815
GLI3	PCSK2	chr20-17456803-17457815
ST18	PCSK2	chr20-17456803-17457815
ZNF521	PCSK2	chr20-17456803-17457815
SMAD2	PCSK2	chr20-17456803-17457815
MEIS1	PCSK2	chr20-17466825-17467744
NFIB	PCSK2	chr20-17466825-17467744
TCF7L2	PCSK2	chr20-17466825-17467744
PAX6	PCSK2	chr20-17466825-17467744
MEIS2	PCSK2	chr20-17466825-17467744
TOX3	PCSK2	chr20-17466825-17467744
RXRG	PCSK2	chr20-17478849-17479820
PROX1	PCSK2	chr20-17478849-17479820
ZBTB18	PCSK2	chr20-17478849-17479820
MEIS2	PCSK2	chr20-17478849-17479820
ZFHX3	PCSK2	chr20-17478849-17479820
ZNF83	PCSK2	chr20-17478849-17479820
RREB1	SLC24A3	chr20-19131138-19132105
ZNF521	SLC24A3	chr20-19131138-19132105
ZNF83	SLC24A3	chr20-19131138-19132105
ZBTB18	SLC24A3	chr20-19205748-19206669
MYT1L	SLC24A3	chr20-19205748-19206669
ISL1	SLC24A3	chr20-19205748-19206669
FOXP2	SLC24A3	chr20-19205748-19206669
NEUROD1	SLC24A3	chr20-19211265-19212645
THRB	SLC24A3	chr20-19211265-19212645
RREB1	SLC24A3	chr20-19211265-19212645
GLI3	SLC24A3	chr20-19211265-19212645
NFIB	SLC24A3	chr20-19211265-19212645
ZNF521	SLC24A3	chr20-19211265-19212645
ZNF536	SLC24A3	chr20-19211265-19212645
ZNF83	SLC24A3	chr20-19211265-19212645
HES6	SLC24A3	chr20-19212985-19213595
MEIS1	SLC24A3	chr20-19216481-19217284
ISL1	SLC24A3	chr20-19216481-19217284
NFIA	SLC24A3	chr20-19249630-19250420
ZBTB18	SLC24A3	chr20-19249630-19250420
ISL1	SLC24A3	chr20-19249630-19250420
ISL1	SLC24A3	chr20-19275402-19276370
NFIB	SLC24A3	chr20-19275402-19276370
RORB	SLC24A3	chr20-19275402-19276370
VSX1	SLC24A3	chr20-19275402-19276370
NFIA	SLC24A3	chr20-19317238-19318173
RXRG	SLC24A3	chr20-19317238-19318173
THRB	SLC24A3	chr20-19317238-19318173
FOXP2	SLC24A3	chr20-19317238-19318173
DACH1	SLC24A3	chr20-19317238-19318173
ZNF521	SLC24A3	chr20-19317238-19318173
ZNF83	SLC24A3	chr20-19317238-19318173
ZBTB18	SLC24A3	chr20-19319618-19320728
MEIS1	SLC24A3	chr20-19319618-19320728
NEUROD1	SLC24A3	chr20-19319618-19320728
RREB1	SLC24A3	chr20-19319618-19320728
NFIB	SLC24A3	chr20-19319618-19320728
DACH1	SLC24A3	chr20-19319618-19320728
ZNF521	SLC24A3	chr20-19319618-19320728
ZNF536	SLC24A3	chr20-19319618-19320728
ZNF83	SLC24A3	chr20-19319618-19320728
TCF7L1	SLC24A3	chr20-19333307-19334151
RREB1	SLC24A3	chr20-19333307-19334151
GLI3	SLC24A3	chr20-19333307-19334151
ZNF521	SLC24A3	chr20-19333307-19334151
ZNF536	SLC24A3	chr20-19333307-19334151
ZBTB18	SLC24A3	chr20-19338660-19339505
CCDC88A	SLC24A3	chr20-19338660-19339505
NEUROD1	SLC24A3	chr20-19338660-19339505
THRB	SLC24A3	chr20-19338660-19339505
SKOR2	SLC24A3	chr20-19338660-19339505
ZNF83	SLC24A3	chr20-19338660-19339505
RXRG	SLC24A3	chr20-19347805-19348754
ZBTB18	SLC24A3	chr20-19347805-19348754
CCDC88A	SLC24A3	chr20-19347805-19348754
MEIS1	SLC24A3	chr20-19347805-19348754
RORB	SLC24A3	chr20-19347805-19348754
ONECUT1	SLC24A3	chr20-19347805-19348754
ZNF536	SLC24A3	chr20-19347805-19348754
ZNF83	SLC24A3	chr20-19347805-19348754
ISL1	SLC24A3	chr20-19361790-19362690
PRDM1	SLC24A3	chr20-19361790-19362690
GLI3	SLC24A3	chr20-19361790-19362690
ONECUT1	SLC24A3	chr20-19361790-19362690
ZNF521	SLC24A3	chr20-19361790-19362690
RAX	SLC24A3	chr20-19361790-19362690
ONECUT3	SLC24A3	chr20-19361790-19362690
ZNF536	SLC24A3	chr20-19361790-19362690
ZNF83	SLC24A3	chr20-19361790-19362690
RXRG	SLC24A3	chr20-19368052-19368967
NEUROD1	SLC24A3	chr20-19368052-19368967
RREB1	SLC24A3	chr20-19368052-19368967
ONECUT1	SLC24A3	chr20-19368052-19368967
ZNF521	SLC24A3	chr20-19368052-19368967
SMAD2	SLC24A3	chr20-19368052-19368967
CCDC88A	SLC24A3	chr20-19370015-19370826
NFIB	SLC24A3	chr20-19370015-19370826
TEAD1	SLC24A3	chr20-19370015-19370826
DACH1	SLC24A3	chr20-19370015-19370826
SMAD2	SLC24A3	chr20-19370015-19370826
ONECUT3	SLC24A3	chr20-19370015-19370826
ZBTB18	SLC24A3	chr20-19375039-19375805
MEIS1	SLC24A3	chr20-19375039-19375805
NEUROD1	SLC24A3	chr20-19375039-19375805
PRDM1	SLC24A3	chr20-19375039-19375805
ZNF521	SLC24A3	chr20-19375039-19375805
ZNF83	SLC24A3	chr20-19375039-19375805
RXRG	SLC24A3	chr20-19376261-19377486
THRB	SLC24A3	chr20-19376261-19377486
ISL1	SLC24A3	chr20-19376261-19377486
RREB1	SLC24A3	chr20-19376261-19377486
GLI3	SLC24A3	chr20-19376261-19377486
SOX6	SLC24A3	chr20-19376261-19377486
ZNF521	SLC24A3	chr20-19376261-19377486
SMAD2	SLC24A3	chr20-19376261-19377486
ZNF536	SLC24A3	chr20-19376261-19377486
ZNF83	SLC24A3	chr20-19376261-19377486
VSX1	SLC24A3	chr20-19376261-19377486
CCDC88A	SLC24A3	chr20-19381668-19384079
MEIS1	SLC24A3	chr20-19381668-19384079
NEUROD1	SLC24A3	chr20-19381668-19384079
HES6	SLC24A3	chr20-19381668-19384079
THRB	SLC24A3	chr20-19381668-19384079
PRDM1	SLC24A3	chr20-19381668-19384079
FOXP2	SLC24A3	chr20-19381668-19384079
RORB	SLC24A3	chr20-19381668-19384079
ONECUT1	SLC24A3	chr20-19381668-19384079
SKOR2	SLC24A3	chr20-19381668-19384079
SMAD2	SLC24A3	chr20-19381668-19384079
ONECUT3	SLC24A3	chr20-19381668-19384079
ZNF536	SLC24A3	chr20-19381668-19384079
ZNF83	SLC24A3	chr20-19381668-19384079
THRB	SLC24A3	chr20-19385105-19386066
RREB1	SLC24A3	chr20-19385105-19386066
ONECUT1	SLC24A3	chr20-19385105-19386066
ZNF521	SLC24A3	chr20-19385105-19386066
SKOR2	SLC24A3	chr20-19385105-19386066
RAX	SLC24A3	chr20-19385105-19386066
ZNF83	SLC24A3	chr20-19385105-19386066
NEUROD1	SLC24A3	chr20-19390222-19390613
GLI3	SLC24A3	chr20-19390222-19390613
NFIB	SLC24A3	chr20-19390222-19390613
ZNF536	SLC24A3	chr20-19390222-19390613
PRDM1	SLC24A3	chr20-19396389-19397315
FOXP2	SLC24A3	chr20-19396389-19397315
ZNF521	SLC24A3	chr20-19396389-19397315
ZNF83	SLC24A3	chr20-19396389-19397315
CUX2	SLC24A3	chr20-19427251-19428086
ONECUT3	SLC24A3	chr20-19427251-19428086
RXRG	SLC24A3	chr20-19429404-19430407
CCDC88A	SLC24A3	chr20-19429404-19430407
MEIS1	SLC24A3	chr20-19429404-19430407
TCF7L1	SLC24A3	chr20-19429404-19430407
THRB	SLC24A3	chr20-19429404-19430407
ONECUT1	SLC24A3	chr20-19429404-19430407
ZNF521	SLC24A3	chr20-19429404-19430407
ONECUT3	SLC24A3	chr20-19429404-19430407
RXRG	SLC24A3	chr20-19430445-19431367
TCF7L1	SLC24A3	chr20-19430445-19431367
NEUROD1	SLC24A3	chr20-19430445-19431367
RARB	SLC24A3	chr20-19430445-19431367
ISL1	SLC24A3	chr20-19430445-19431367
ZNF83	SLC24A3	chr20-19430445-19431367
ZNF536	SLC24A3	chr20-19440555-19441458
ZNF83	SLC24A3	chr20-19440555-19441458
ZBTB18	SLC24A3	chr20-19448829-19449591
THRB	SLC24A3	chr20-19448829-19449591
PRDM1	SLC24A3	chr20-19448829-19449591
NFIB	SLC24A3	chr20-19448829-19449591
ZNF521	SLC24A3	chr20-19448829-19449591
ZNF83	SLC24A3	chr20-19448829-19449591
RXRG	SLC24A3	chr20-19453554-19454452
NEUROD1	SLC24A3	chr20-19453554-19454452
THRB	SLC24A3	chr20-19453554-19454452
SMAD2	SLC24A3	chr20-19453554-19454452
MEIS1	SLC24A3	chr20-19456395-19457126
TCF7L1	SLC24A3	chr20-19456395-19457126
RREB1	SLC24A3	chr20-19456395-19457126
PRDM1	SLC24A3	chr20-19456395-19457126
GLI3	SLC24A3	chr20-19456395-19457126
ONECUT1	SLC24A3	chr20-19456395-19457126
ZNF521	SLC24A3	chr20-19456395-19457126
SMAD2	SLC24A3	chr20-19456395-19457126
ONECUT3	SLC24A3	chr20-19456395-19457126
ZNF536	SLC24A3	chr20-19456395-19457126
RXRG	SLC24A3	chr20-19457373-19458326
NEUROD1	SLC24A3	chr20-19457373-19458326
HES6	SLC24A3	chr20-19457373-19458326
THRB	SLC24A3	chr20-19457373-19458326
PRDM1	SLC24A3	chr20-19457373-19458326
SOX6	SLC24A3	chr20-19457373-19458326
ZBTB18	SLC24A3	chr20-19459913-19460901
CCDC88A	SLC24A3	chr20-19459913-19460901
NEUROD1	SLC24A3	chr20-19459913-19460901
ZNF521	SLC24A3	chr20-19459913-19460901
ZNF536	SLC24A3	chr20-19459913-19460901
ZNF83	SLC24A3	chr20-19459913-19460901
RXRG	SLC24A3	chr20-19465665-19467316
ZBTB18	SLC24A3	chr20-19465665-19467316
ZNF385D	SLC24A3	chr20-19465665-19467316
PRDM1	SLC24A3	chr20-19465665-19467316
GLI3	SLC24A3	chr20-19465665-19467316
FOXP2	SLC24A3	chr20-19465665-19467316
NFIB	SLC24A3	chr20-19465665-19467316
ONECUT1	SLC24A3	chr20-19465665-19467316
ZNF521	SLC24A3	chr20-19465665-19467316
ONECUT3	SLC24A3	chr20-19465665-19467316
ZNF536	SLC24A3	chr20-19465665-19467316
ZNF83	SLC24A3	chr20-19465665-19467316
NFIA	SLC24A3	chr20-19473513-19474533
RXRG	SLC24A3	chr20-19473513-19474533
MEIS1	SLC24A3	chr20-19473513-19474533
GLI3	SLC24A3	chr20-19473513-19474533
ZNF521	SLC24A3	chr20-19473513-19474533
SKOR2	SLC24A3	chr20-19473513-19474533
ZNF536	SLC24A3	chr20-19473513-19474533
ZNF83	SLC24A3	chr20-19473513-19474533
ZBTB18	SLC24A3	chr20-19492658-19493625
MYT1L	SLC24A3	chr20-19492658-19493625
ONECUT1	SLC24A3	chr20-19492658-19493625
ZNF521	SLC24A3	chr20-19492658-19493625
SKOR2	SLC24A3	chr20-19492658-19493625
ONECUT3	SLC24A3	chr20-19492658-19493625
ISL1	SLC24A3	chr20-19501500-19502593
NFIB	SLC24A3	chr20-19501500-19502593
ZNF521	SLC24A3	chr20-19501500-19502593
ZNF83	SLC24A3	chr20-19501500-19502593
RXRG	SLC24A3	chr20-19508173-19509151
NEUROD1	SLC24A3	chr20-19508173-19509151
THRB	SLC24A3	chr20-19508173-19509151
FOXP2	SLC24A3	chr20-19508173-19509151
CUX2	SLC24A3	chr20-19508173-19509151
ZNF83	SLC24A3	chr20-19508173-19509151
ZBTB18	SLC24A3	chr20-19511798-19512669
ZNF536	SLC24A3	chr20-19511798-19512669
NFIA	SLC24A3	chr20-19512698-19513712
RXRG	SLC24A3	chr20-19512698-19513712
MEIS1	SLC24A3	chr20-19512698-19513712
NEUROD1	SLC24A3	chr20-19512698-19513712
THRB	SLC24A3	chr20-19512698-19513712
RREB1	SLC24A3	chr20-19512698-19513712
NFIB	SLC24A3	chr20-19512698-19513712
RORB	SLC24A3	chr20-19512698-19513712
SOX6	SLC24A3	chr20-19512698-19513712
CUX2	SLC24A3	chr20-19512698-19513712
ZNF521	SLC24A3	chr20-19512698-19513712
ZNF83	SLC24A3	chr20-19512698-19513712
RXRG	SLC24A3	chr20-19519965-19520870
MEIS1	SLC24A3	chr20-19519965-19520870
NEUROD1	SLC24A3	chr20-19519965-19520870
RARB	SLC24A3	chr20-19519965-19520870
ISL1	SLC24A3	chr20-19519965-19520870
GLI3	SLC24A3	chr20-19519965-19520870
RAX	SLC24A3	chr20-19519965-19520870
ZNF536	SLC24A3	chr20-19519965-19520870
ZNF83	SLC24A3	chr20-19519965-19520870
VSX1	SLC24A3	chr20-19519965-19520870
CCDC88A	SLC24A3	chr20-19529791-19530699
MEIS1	SLC24A3	chr20-19529791-19530699
DACH1	SLC24A3	chr20-19529791-19530699
SMAD2	SLC24A3	chr20-19529791-19530699
SKOR2	SLC24A3	chr20-19533587-19534223
SMAD2	SLC24A3	chr20-19533587-19534223
ZNF83	SLC24A3	chr20-19533587-19534223
RXRG	SLC24A3	chr20-19538877-19539735
ZBTB18	SLC24A3	chr20-19538877-19539735
CCDC88A	SLC24A3	chr20-19538877-19539735
GLI3	SLC24A3	chr20-19538877-19539735
ONECUT1	SLC24A3	chr20-19538877-19539735
ONECUT3	SLC24A3	chr20-19538877-19539735
ZNF536	SLC24A3	chr20-19538877-19539735
ZNF536	SLC24A3	chr20-19540178-19541089
ISL1	SLC24A3	chr20-19547235-19548051
PRDM1	SLC24A3	chr20-19547235-19548051
RXRG	SLC24A3	chr20-19552070-19553175
MEIS1	SLC24A3	chr20-19552070-19553175
PRDM1	SLC24A3	chr20-19552070-19553175
SOX6	SLC24A3	chr20-19552070-19553175
ZNF521	SLC24A3	chr20-19552070-19553175
SMAD2	SLC24A3	chr20-19552070-19553175
ZNF536	SLC24A3	chr20-19552070-19553175
RXRG	SLC24A3	chr20-19560791-19563166
ZBTB18	SLC24A3	chr20-19560791-19563166
NEUROD1	SLC24A3	chr20-19560791-19563166
THRB	SLC24A3	chr20-19560791-19563166
ISL1	SLC24A3	chr20-19560791-19563166
PRDM1	SLC24A3	chr20-19560791-19563166
RORB	SLC24A3	chr20-19560791-19563166
TEAD1	SLC24A3	chr20-19560791-19563166
SKOR2	SLC24A3	chr20-19560791-19563166
ZNF83	SLC24A3	chr20-19560791-19563166
VSX1	SLC24A3	chr20-19560791-19563166
RXRG	SLC24A3	chr20-19577834-19578655
ZBTB18	SLC24A3	chr20-19577834-19578655
THRB	SLC24A3	chr20-19577834-19578655
ZNF83	SLC24A3	chr20-19577834-19578655
RXRG	SLC24A3	chr20-19582445-19584441
CCDC88A	SLC24A3	chr20-19582445-19584441
RREB1	SLC24A3	chr20-19582445-19584441
PRDM1	SLC24A3	chr20-19582445-19584441
RORB	SLC24A3	chr20-19582445-19584441
ZNF521	SLC24A3	chr20-19582445-19584441
ZNF83	SLC24A3	chr20-19582445-19584441
ISL1	SLC24A3	chr20-19587906-19588803
TEAD1	SLC24A3	chr20-19587906-19588803
SKOR2	SLC24A3	chr20-19587906-19588803
ZNF536	SLC24A3	chr20-19587906-19588803
MEIS1	SLC24A3	chr20-19588921-19589836
ISL1	SLC24A3	chr20-19588921-19589836
PRDM1	SLC24A3	chr20-19588921-19589836
TEAD1	SLC24A3	chr20-19588921-19589836
SOX6	SLC24A3	chr20-19588921-19589836
SMAD2	SLC24A3	chr20-19588921-19589836
ZNF83	SLC24A3	chr20-19588921-19589836
RXRG	SLC24A3	chr20-19605883-19606791
CCDC88A	SLC24A3	chr20-19605883-19606791
THRB	SLC24A3	chr20-19605883-19606791
RARB	SLC24A3	chr20-19605883-19606791
ONECUT1	SLC24A3	chr20-19605883-19606791
ZNF521	SLC24A3	chr20-19605883-19606791
ONECUT3	SLC24A3	chr20-19605883-19606791
ZNF83	SLC24A3	chr20-19605883-19606791
RREB1	SLC24A3	chr20-19614390-19615360
PRDM1	SLC24A3	chr20-19614390-19615360
TEAD1	SLC24A3	chr20-19614390-19615360
CUX2	SLC24A3	chr20-19614390-19615360
ONECUT1	SLC24A3	chr20-19614390-19615360
ZNF521	SLC24A3	chr20-19614390-19615360
SKOR2	SLC24A3	chr20-19614390-19615360
RAX	SLC24A3	chr20-19614390-19615360
ONECUT3	SLC24A3	chr20-19614390-19615360
ZNF83	SLC24A3	chr20-19614390-19615360
NFIA	SLC24A3	chr20-19654458-19655623
RXRG	SLC24A3	chr20-19654458-19655623
CCDC88A	SLC24A3	chr20-19654458-19655623
THRB	SLC24A3	chr20-19654458-19655623
GLI3	SLC24A3	chr20-19654458-19655623
NFIB	SLC24A3	chr20-19654458-19655623
ZNF536	SLC24A3	chr20-19654458-19655623
ZNF83	SLC24A3	chr20-19654458-19655623
RXRG	SLC24A3	chr20-19661843-19662998
CCDC88A	SLC24A3	chr20-19661843-19662998
HES6	SLC24A3	chr20-19661843-19662998
THRB	SLC24A3	chr20-19661843-19662998
RREB1	SLC24A3	chr20-19661843-19662998
GLI3	SLC24A3	chr20-19661843-19662998
RORB	SLC24A3	chr20-19661843-19662998
DACH1	SLC24A3	chr20-19661843-19662998
ZNF521	SLC24A3	chr20-19661843-19662998
ZNF536	SLC24A3	chr20-19661843-19662998
ZNF83	SLC24A3	chr20-19661843-19662998
ZBTB18	SLC24A3	chr20-19667538-19668499
THRB	SLC24A3	chr20-19667538-19668499
TEAD1	SLC24A3	chr20-19667538-19668499
RXRG	SLC24A3	chr20-19683354-19683829
MEIS1	SLC24A3	chr20-19688039-19688982
NFIB	SLC24A3	chr20-19688039-19688982
DACH1	SLC24A3	chr20-19688039-19688982
ZNF83	SLC24A3	chr20-19688039-19688982
MYT1L	SLC24A3	chr20-19692288-19693208
NEUROD1	SLC24A3	chr20-19692288-19693208
NFIB	SLC24A3	chr20-19692288-19693208
TEAD1	SLC24A3	chr20-19692288-19693208
ZNF521	SLC24A3	chr20-19692288-19693208
CCDC88A	SLC24A3	chr20-19704249-19705915
THRB	SLC24A3	chr20-19704249-19705915
ISL1	SLC24A3	chr20-19704249-19705915
ZNF83	SLC24A3	chr20-19704249-19705915
ZBTB18	SLC24A3	chr20-19710042-19711136
ISL1	SLC24A3	chr20-19710042-19711136
DACH1	SLC24A3	chr20-19710042-19711136
ZNF83	SLC24A3	chr20-19710042-19711136
PROX1	SLC24A3	chr20-19712576-19713684
SOX6	SLC24A3	chr20-19712576-19713684
ZBTB18	SLC24A3	chr20-19719034-19720161
CCDC88A	SLC24A3	chr20-19719034-19720161
ISL1	SLC24A3	chr20-19719034-19720161
RORB	SLC24A3	chr20-19719034-19720161
ZNF521	SLC24A3	chr20-19719034-19720161
RAX	SLC24A3	chr20-19719034-19720161
ZNF83	SLC24A3	chr20-19719034-19720161
CCDC88A	SYNDIG1	chr20-24372842-24374021
PROX1	SYNDIG1	chr20-24374072-24374729
ZFHX3	SYNDIG1	chr20-24378110-24379292
CCDC88A	SYNDIG1	chr20-24381722-24384511
ZNF536	SYNDIG1	chr20-24385308-24386209
CCDC88A	SYNDIG1	chr20-24392806-24393577
ISL1	SYNDIG1	chr20-24420319-24421236
CCDC88A	SYNDIG1	chr20-24422117-24422945
ZNF536	SYNDIG1	chr20-24450362-24451253
ZNF536	SYNDIG1	chr20-24452551-24453359
CCDC88A	SYNDIG1	chr20-24455453-24456570
ZNF536	SYNDIG1	chr20-24458194-24459146
ZNF536	SYNDIG1	chr20-24468505-24469198
MYT1L	SYNDIG1	chr20-24469754-24471879
ST18	SYNDIG1	chr20-24469754-24471879
ZFHX3	SYNDIG1	chr20-24469754-24471879
ZNF536	SYNDIG1	chr20-24479294-24480338
MYT1L	SYNDIG1	chr20-24483291-24484282
ST18	SYNDIG1	chr20-24483291-24484282
PROX1	SYNDIG1	chr20-24490694-24491684
ZNF536	SYNDIG1	chr20-24492005-24492944
PROX1	SYNDIG1	chr20-24501868-24503841
CCDC88A	SYNDIG1	chr20-24501868-24503841
ISL1	SYNDIG1	chr20-24507243-24508013
CCDC88A	SYNDIG1	chr20-24531435-24532387
CCDC88A	SYNDIG1	chr20-24542228-24543019
PROX1	SYNDIG1	chr20-24587098-24588041
ZFHX3	SYNDIG1	chr20-24588672-24591177
ZNF536	SYNDIG1	chr20-24588672-24591177
CCDC88A	SYNDIG1	chr20-24616358-24617260
CCDC88A	SYNDIG1	chr20-24627906-24628467
ISL1	SYNDIG1	chr20-24627906-24628467
ISL1	SYNDIG1	chr20-24633083-24633882
ZNF536	SYNDIG1	chr20-24633083-24633882
CCDC88A	SYNDIG1	chr20-24634551-24635484
ZNF536	SYNDIG1	chr20-24634551-24635484
CCDC88A	SYNDIG1	chr20-24638765-24639798
ZNF536	SYNDIG1	chr20-24638765-24639798
ZFHX3	SYNDIG1	chr20-24651602-24652354
ZNF536	SYNDIG1	chr20-24651602-24652354
CCDC88A	SYNDIG1	chr20-24653159-24653877
ZBTB18	VSX1	chr20-24980651-24981728
PRDM8	VSX1	chr20-24980651-24981728
DACH1	VSX1	chr20-24980651-24981728
MEIS2	VSX1	chr20-24980651-24981728
ESRRG	VSX1	chr20-24991846-24992593
PRDM8	VSX1	chr20-24991846-24992593
ZNF521	VSX1	chr20-24991846-24992593
NFIA	VSX1	chr20-24992980-24996718
RXRG	VSX1	chr20-24992980-24996718
ZBTB18	VSX1	chr20-24992980-24996718
MYT1L	VSX1	chr20-24992980-24996718
RREB1	VSX1	chr20-24992980-24996718
PRDM1	VSX1	chr20-24992980-24996718
ST18	VSX1	chr20-24992980-24996718
NFIB	VSX1	chr20-24992980-24996718
ATOH7	VSX1	chr20-24992980-24996718
MEIS2	VSX1	chr20-24992980-24996718
ONECUT1	VSX1	chr20-24992980-24996718
TOX3	VSX1	chr20-24992980-24996718
SMAD2	VSX1	chr20-24992980-24996718
ONECUT3	VSX1	chr20-24992980-24996718
ZNF83	VSX1	chr20-24992980-24996718
RXRG	VSX1	chr20-25025291-25026123
CCDC88A	VSX1	chr20-25025291-25026123
TCF7L2	VSX1	chr20-25025291-25026123
ZNF521	VSX1	chr20-25025291-25026123
SMAD2	VSX1	chr20-25025291-25026123
RXRG	VSX1	chr20-25029983-25030758
ZBTB18	VSX1	chr20-25029983-25030758
CCDC88A	VSX1	chr20-25029983-25030758
PRDM8	VSX1	chr20-25029983-25030758
RORB	VSX1	chr20-25029983-25030758
ZNF521	VSX1	chr20-25029983-25030758
ZNF83	VSX1	chr20-25029983-25030758
HES6	VSX1	chr20-25032012-25032368
PRDM8	VSX1	chr20-25032012-25032368
PRDM1	VSX1	chr20-25032012-25032368
NEUROD1	VSX1	chr20-25032707-25033931
RREB1	VSX1	chr20-25032707-25033931
NFIB	VSX1	chr20-25032707-25033931
MEIS2	VSX1	chr20-25032707-25033931
ZNF521	VSX1	chr20-25032707-25033931
ZNF83	VSX1	chr20-25032707-25033931
CCDC88A	VSX1	chr20-25036728-25039344
NEUROD1	VSX1	chr20-25036728-25039344
PRDM8	VSX1	chr20-25036728-25039344
ISL1	VSX1	chr20-25036728-25039344
RREB1	VSX1	chr20-25036728-25039344
PRDM1	VSX1	chr20-25036728-25039344
FOXP2	VSX1	chr20-25036728-25039344
NFIB	VSX1	chr20-25036728-25039344
TCF7L2	VSX1	chr20-25036728-25039344
ZNF521	VSX1	chr20-25036728-25039344
SMAD2	VSX1	chr20-25036728-25039344
ZNF83	VSX1	chr20-25036728-25039344
NFIA	VSX1	chr20-25039673-25040466
NEUROD1	VSX1	chr20-25039673-25040466
FOXP2	VSX1	chr20-25039673-25040466
NFIB	VSX1	chr20-25039673-25040466
PAX6	VSX1	chr20-25039673-25040466
DACH1	VSX1	chr20-25039673-25040466
ZNF83	VSX1	chr20-25039673-25040466
RXRG	VSX1	chr20-25042552-25043727
ZBTB18	VSX1	chr20-25042552-25043727
PRDM8	VSX1	chr20-25042552-25043727
RREB1	VSX1	chr20-25042552-25043727
ZNF521	VSX1	chr20-25042552-25043727
RAX	VSX1	chr20-25042552-25043727
ZNF83	VSX1	chr20-25042552-25043727
RXRG	VSX1	chr20-25044595-25045596
ESRRG	VSX1	chr20-25044595-25045596
NEUROD1	VSX1	chr20-25044595-25045596
SOX2	VSX1	chr20-25044595-25045596
FOXP2	VSX1	chr20-25044595-25045596
MEIS2	VSX1	chr20-25044595-25045596
ONECUT1	VSX1	chr20-25044595-25045596
ZFHX3	VSX1	chr20-25044595-25045596
ZNF521	VSX1	chr20-25044595-25045596
SMAD2	VSX1	chr20-25044595-25045596
ONECUT3	VSX1	chr20-25044595-25045596
NFIA	VSX1	chr20-25048309-25051623
RXRG	VSX1	chr20-25048309-25051623
ESRRG	VSX1	chr20-25048309-25051623
ZBTB18	VSX1	chr20-25048309-25051623
PRDM8	VSX1	chr20-25048309-25051623
RREB1	VSX1	chr20-25048309-25051623
TCF7L2	VSX1	chr20-25048309-25051623
SOX6	VSX1	chr20-25048309-25051623
TOX3	VSX1	chr20-25048309-25051623
ZFHX3	VSX1	chr20-25048309-25051623
ZNF521	VSX1	chr20-25048309-25051623
SMAD2	VSX1	chr20-25048309-25051623
ZNF83	VSX1	chr20-25048309-25051623
RXRG	VSX1	chr20-25054047-25054593
ESRRG	VSX1	chr20-25054047-25054593
ZBTB18	VSX1	chr20-25054047-25054593
PRDM8	VSX1	chr20-25054047-25054593
ZNF521	VSX1	chr20-25054047-25054593
NFIA	VSX1	chr20-25056592-25057768
PRDM8	VSX1	chr20-25056592-25057768
SMAD2	VSX1	chr20-25056592-25057768
ZNF83	VSX1	chr20-25056592-25057768
ZBTB18	VSX1	chr20-25058981-25060066
HES6	VSX1	chr20-25058981-25060066
FOXP2	VSX1	chr20-25058981-25060066
MEIS2	VSX1	chr20-25058981-25060066
ONECUT1	VSX1	chr20-25058981-25060066
RXRG	VSX1	chr20-25064312-25066607
TCF7L1	VSX1	chr20-25064312-25066607
SOX2	VSX1	chr20-25064312-25066607
PRDM8	VSX1	chr20-25064312-25066607
ISL1	VSX1	chr20-25064312-25066607
TCF7L2	VSX1	chr20-25064312-25066607
PAX6	VSX1	chr20-25064312-25066607
TOX3	VSX1	chr20-25064312-25066607
ZNF521	VSX1	chr20-25064312-25066607
SMAD2	VSX1	chr20-25064312-25066607
ZNF83	VSX1	chr20-25064312-25066607
ESRRG	VSX1	chr20-25072019-25072535
ZBTB18	VSX1	chr20-25072019-25072535
TOX3	VSX1	chr20-25072019-25072535
ONECUT1	VSX1	chr20-25072644-25072824
ONECUT3	VSX1	chr20-25072644-25072824
RXRG	VSX1	chr20-25073493-25073880
ESRRG	VSX1	chr20-25073493-25073880
ZNF521	VSX1	chr20-25073493-25073880
SMAD2	VSX1	chr20-25073493-25073880
RXRG	VSX1	chr20-25075203-25075298
ZNF521	VSX1	chr20-25075203-25075298
ZNF83	VSX1	chr20-25075203-25075298
CCDC88A	VSX1	chr20-25076551-25077684
PRDM8	VSX1	chr20-25076551-25077684
NFIB	VSX1	chr20-25076551-25077684
ZFHX3	VSX1	chr20-25076551-25077684
RAX	VSX1	chr20-25076551-25077684
ZNF83	VSX1	chr20-25076551-25077684
PRDM8	VSX1	chr20-25080937-25081672
RREB1	VSX1	chr20-25080937-25081672
PRDM1	VSX1	chr20-25080937-25081672
ZNF521	VSX1	chr20-25080937-25081672
RXRG	VSX1	chr20-25082366-25085698
PROX1	VSX1	chr20-25082366-25085698
ESRRG	VSX1	chr20-25082366-25085698
CCDC88A	VSX1	chr20-25082366-25085698
TCF7L2	VSX1	chr20-25082366-25085698
TOX3	VSX1	chr20-25082366-25085698
SMAD2	VSX1	chr20-25082366-25085698
ZNF83	VSX1	chr20-25082366-25085698
ESRRG	VSX1	chr20-25087280-25088200
PRDM8	VSX1	chr20-25087280-25088200
RREB1	VSX1	chr20-25087280-25088200
NFIB	VSX1	chr20-25087280-25088200
SOX6	VSX1	chr20-25087280-25088200
ZNF521	VSX1	chr20-25087280-25088200
ZNF83	VSX1	chr20-25087280-25088200
RXRG	VSX1	chr20-25090555-25091569
NEUROD1	VSX1	chr20-25090555-25091569
PRDM8	VSX1	chr20-25090555-25091569
NFIB	VSX1	chr20-25090555-25091569
ATOH7	VSX1	chr20-25090555-25091569
ZNF521	VSX1	chr20-25090555-25091569
ZNF83	VSX1	chr20-25090555-25091569
CCDC88A	VSX1	chr20-25091636-25092477
NEUROD1	VSX1	chr20-25091636-25092477
PRDM8	VSX1	chr20-25091636-25092477
ZNF83	VSX1	chr20-25091636-25092477
NEUROD1	VSX1	chr20-25105067-25105951
PRDM8	VSX1	chr20-25105067-25105951
FOXP2	VSX1	chr20-25105067-25105951
NFIB	VSX1	chr20-25105067-25105951
RORB	VSX1	chr20-25105067-25105951
ZNF83	VSX1	chr20-25105067-25105951
MYT1L	VSX1	chr20-25112988-25113551
HES6	VSX1	chr20-25112988-25113551
PRDM8	VSX1	chr20-25112988-25113551
ST18	VSX1	chr20-25112988-25113551
ZNF521	VSX1	chr20-25112988-25113551
RXRG	VSX1	chr20-25114928-25117672
MYT1L	VSX1	chr20-25114928-25117672
CCDC88A	VSX1	chr20-25114928-25117672
NEUROD1	VSX1	chr20-25114928-25117672
SOX2	VSX1	chr20-25114928-25117672
PRDM8	VSX1	chr20-25114928-25117672
ISL1	VSX1	chr20-25114928-25117672
RREB1	VSX1	chr20-25114928-25117672
ST18	VSX1	chr20-25114928-25117672
NFIB	VSX1	chr20-25114928-25117672
SOX6	VSX1	chr20-25114928-25117672
MEIS2	VSX1	chr20-25114928-25117672
ZNF521	VSX1	chr20-25114928-25117672
ZNF83	VSX1	chr20-25114928-25117672
ZNF83	VSX1	chr20-25118033-25118959
ISL1	VSX1	chr20-25121891-25122632
TCF7L2	VSX1	chr20-25121891-25122632
ZNF521	VSX1	chr20-25121891-25122632
RXRG	VSX1	chr20-25128697-25129727
PRDM8	VSX1	chr20-25128697-25129727
SOX6	VSX1	chr20-25128697-25129727
ONECUT1	VSX1	chr20-25128697-25129727
TOX3	VSX1	chr20-25128697-25129727
ZFHX3	VSX1	chr20-25128697-25129727
ZNF521	VSX1	chr20-25128697-25129727
SMAD2	VSX1	chr20-25128697-25129727
ONECUT3	VSX1	chr20-25128697-25129727
ESRRG	VSX1	chr20-25135924-25136936
CCDC88A	VSX1	chr20-25135924-25136936
SOX2	VSX1	chr20-25135924-25136936
PRDM8	VSX1	chr20-25135924-25136936
PRDM1	VSX1	chr20-25135924-25136936
ATOH7	VSX1	chr20-25135924-25136936
SOX6	VSX1	chr20-25135924-25136936
TOX3	VSX1	chr20-25135924-25136936
SMAD2	VSX1	chr20-25135924-25136936
CCDC88A	VSX1	chr20-25138712-25139745
RREB1	VSX1	chr20-25138712-25139745
RORB	VSX1	chr20-25138712-25139745
ZNF521	VSX1	chr20-25138712-25139745
SMAD2	VSX1	chr20-25138712-25139745
ONECUT3	VSX1	chr20-25138712-25139745
RXRG	VSX1	chr20-25142985-25143239
ESRRG	VSX1	chr20-25142985-25143239
ZFHX3	VSX1	chr20-25142985-25143239
MEIS2	VSX1	chr20-25143514-25143914
HES6	VSX1	chr20-25144867-25145759
RREB1	VSX1	chr20-25144867-25145759
NFIB	VSX1	chr20-25144867-25145759
TCF7L2	VSX1	chr20-25144867-25145759
MEIS2	VSX1	chr20-25144867-25145759
ONECUT1	VSX1	chr20-25144867-25145759
TOX3	VSX1	chr20-25144867-25145759
ZNF521	VSX1	chr20-25144867-25145759
ZNF83	VSX1	chr20-25144867-25145759
PRDM8	VSX1	chr20-25146371-25147448
RREB1	VSX1	chr20-25146371-25147448
PRDM1	VSX1	chr20-25146371-25147448
MEIS2	VSX1	chr20-25146371-25147448
ZNF521	VSX1	chr20-25146371-25147448
SMAD2	VSX1	chr20-25146371-25147448
ZNF83	VSX1	chr20-25146371-25147448
CCDC88A	VSX1	chr20-25148791-25149191
HES6	VSX1	chr20-25148791-25149191
PAX6	VSX1	chr20-25148791-25149191
NFIA	VSX1	chr20-25149259-25151201
ZBTB18	VSX1	chr20-25149259-25151201
MYT1L	VSX1	chr20-25149259-25151201
ISL1	VSX1	chr20-25149259-25151201
ST18	VSX1	chr20-25149259-25151201
NFIB	VSX1	chr20-25149259-25151201
DACH1	VSX1	chr20-25149259-25151201
ONECUT1	VSX1	chr20-25149259-25151201
ZFHX3	VSX1	chr20-25149259-25151201
RXRG	VSX1	chr20-25176372-25177205
RREB1	VSX1	chr20-25176372-25177205
PRDM1	VSX1	chr20-25176372-25177205
NFIB	VSX1	chr20-25176372-25177205
ZNF521	VSX1	chr20-25176372-25177205
CCDC88A	VSX1	chr20-25178821-25179789
ISL1	VSX1	chr20-25178821-25179789
FOXP2	VSX1	chr20-25178821-25179789
ONECUT1	VSX1	chr20-25178821-25179789
EGR1	ID1	chr20-31513481-31514427
NR2E1	ID1	chr20-31513481-31514427
CREB5	ID1	chr20-31513481-31514427
FOXP2	ID1	chr20-31513481-31514427
ID2	ID1	chr20-31543874-31544811
TCF7L1	ID1	chr20-31543874-31544811
GLI3	ID1	chr20-31543874-31544811
TCF7L2	ID1	chr20-31543874-31544811
FOS	ID1	chr20-31543874-31544811
NR2E1	ID1	chr20-31545823-31545971
ETV5	ID1	chr20-31546431-31547381
ID2	ID1	chr20-31553140-31554587
NR2E1	ID1	chr20-31553140-31554587
GLI3	ID1	chr20-31553140-31554587
TCF7L1	ID1	chr20-31554830-31555144
HES5	ID1	chr20-31556887-31558071
ID2	ID1	chr20-31556887-31558071
RARB	ID1	chr20-31556887-31558071
HES1	ID1	chr20-31556887-31558071
NR2E1	ID1	chr20-31556887-31558071
MYB	ID1	chr20-31556887-31558071
GLI3	ID1	chr20-31556887-31558071
NR2E1	ID1	chr20-31559765-31560650
NR2E1	ID1	chr20-31562672-31563563
NR4A1	ID1	chr20-31562672-31563563
ID2	ID1	chr20-31568652-31569119
GLI3	ID1	chr20-31568652-31569119
TCF7L1	ID1	chr20-31572020-31574620
EGR1	ID1	chr20-31572020-31574620
NR2E1	ID1	chr20-31572020-31574620
FOS	ID1	chr20-31572020-31574620
EGR1	ID1	chr20-31578126-31579034
GLI3	ID1	chr20-31578126-31579034
ID2	ID1	chr20-31586930-31589094
EGR1	ID1	chr20-31586930-31589094
NR2E1	ID1	chr20-31586930-31589094
PAX6	ID1	chr20-31586930-31589094
FOS	ID1	chr20-31586930-31589094
ID2	ID1	chr20-31590975-31591650
RARB	ID1	chr20-31590975-31591650
NR2E1	ID1	chr20-31590975-31591650
ID2	ID1	chr20-31594614-31596838
SOX2	ID1	chr20-31594614-31596838
HES1	ID1	chr20-31594614-31596838
EGR1	ID1	chr20-31594614-31596838
NR2E1	ID1	chr20-31594614-31596838
GLI3	ID1	chr20-31594614-31596838
FOXP2	ID1	chr20-31594614-31596838
GLIS3	ID1	chr20-31594614-31596838
RARB	ID1	chr20-31602517-31605282
EGR1	ID1	chr20-31602517-31605282
NR2E1	ID1	chr20-31602517-31605282
CREB5	ID1	chr20-31602517-31605282
GLI3	ID1	chr20-31602517-31605282
FOXP2	ID1	chr20-31602517-31605282
FOS	ID1	chr20-31602517-31605282
PRDM8	BCL2L1	chr20-31568652-31569119
PRDM1	BCL2L1	chr20-31568652-31569119
RXRG	BCL2L1	chr20-31572020-31574620
NEUROD1	BCL2L1	chr20-31572020-31574620
THRB	BCL2L1	chr20-31572020-31574620
PRDM8	BCL2L1	chr20-31572020-31574620
RREB1	BCL2L1	chr20-31572020-31574620
ONECUT1	BCL2L1	chr20-31572020-31574620
SMAD2	BCL2L1	chr20-31572020-31574620
ONECUT3	BCL2L1	chr20-31572020-31574620
ZNF83	BCL2L1	chr20-31572020-31574620
PRDM8	BCL2L1	chr20-31578126-31579034
MEIS2	BCL2L1	chr20-31578126-31579034
RAX	BCL2L1	chr20-31578126-31579034
ZNF83	BCL2L1	chr20-31578126-31579034
RXRG	BCL2L1	chr20-31586930-31589094
ZBTB18	BCL2L1	chr20-31586930-31589094
NEUROD1	BCL2L1	chr20-31586930-31589094
THRB	BCL2L1	chr20-31586930-31589094
PRDM8	BCL2L1	chr20-31586930-31589094
RREB1	BCL2L1	chr20-31586930-31589094
ONECUT1	BCL2L1	chr20-31586930-31589094
SMAD2	BCL2L1	chr20-31586930-31589094
ONECUT3	BCL2L1	chr20-31586930-31589094
ZNF83	BCL2L1	chr20-31586930-31589094
RXRG	BCL2L1	chr20-31590975-31591650
ZBTB18	BCL2L1	chr20-31590975-31591650
RREB1	BCL2L1	chr20-31590975-31591650
PRDM1	BCL2L1	chr20-31590975-31591650
SMAD2	BCL2L1	chr20-31590975-31591650
ZNF83	BCL2L1	chr20-31590975-31591650
RXRG	BCL2L1	chr20-31594614-31596838
ZBTB18	BCL2L1	chr20-31594614-31596838
THRB	BCL2L1	chr20-31594614-31596838
PRDM8	BCL2L1	chr20-31594614-31596838
RREB1	BCL2L1	chr20-31594614-31596838
PRDM1	BCL2L1	chr20-31594614-31596838
FOXP2	BCL2L1	chr20-31594614-31596838
ZNF83	BCL2L1	chr20-31594614-31596838
RXRG	BCL2L1	chr20-31602517-31605282
ZBTB18	BCL2L1	chr20-31602517-31605282
PRDM8	BCL2L1	chr20-31602517-31605282
RREB1	BCL2L1	chr20-31602517-31605282
PRDM1	BCL2L1	chr20-31602517-31605282
FOXP2	BCL2L1	chr20-31602517-31605282
ZFHX3	BCL2L1	chr20-31602517-31605282
SMAD2	BCL2L1	chr20-31602517-31605282
RAX	BCL2L1	chr20-31602517-31605282
THRB	BCL2L1	chr20-31606516-31609205
DACH1	BCL2L1	chr20-31606516-31609205
MEIS2	BCL2L1	chr20-31606516-31609205
ONECUT1	BCL2L1	chr20-31606516-31609205
ONECUT3	BCL2L1	chr20-31606516-31609205
ZNF83	BCL2L1	chr20-31606516-31609205
PRDM8	BCL2L1	chr20-31610538-31610869
SMAD2	BCL2L1	chr20-31610538-31610869
ZNF83	BCL2L1	chr20-31610538-31610869
RXRG	BCL2L1	chr20-31612337-31613865
ZNF83	BCL2L1	chr20-31612337-31613865
THRB	BCL2L1	chr20-31633936-31634921
RREB1	BCL2L1	chr20-31633936-31634921
ONECUT1	BCL2L1	chr20-31633936-31634921
ONECUT3	BCL2L1	chr20-31633936-31634921
ZNF83	BCL2L1	chr20-31633936-31634921
THRB	BCL2L1	chr20-31637450-31637887
RXRG	BCL2L1	chr20-31637963-31639017
ZBTB18	BCL2L1	chr20-31637963-31639017
NEUROD1	BCL2L1	chr20-31637963-31639017
PRDM8	BCL2L1	chr20-31637963-31639017
RREB1	BCL2L1	chr20-31637963-31639017
SMAD2	BCL2L1	chr20-31637963-31639017
ZNF83	BCL2L1	chr20-31637963-31639017
PRDM8	BCL2L1	chr20-31644357-31644767
PRDM1	BCL2L1	chr20-31644357-31644767
ZFHX3	BCL2L1	chr20-31645007-31645327
SMAD2	BCL2L1	chr20-31645007-31645327
RAX	BCL2L1	chr20-31645007-31645327
ZNF83	BCL2L1	chr20-31645007-31645327
RXRG	BCL2L1	chr20-31647963-31648969
ZBTB18	BCL2L1	chr20-31647963-31648969
THRB	BCL2L1	chr20-31647963-31648969
RREB1	BCL2L1	chr20-31647963-31648969
DACH1	BCL2L1	chr20-31647963-31648969
ONECUT1	BCL2L1	chr20-31647963-31648969
ONECUT3	BCL2L1	chr20-31647963-31648969
NEUROD1	BCL2L1	chr20-31652607-31653578
PRDM8	BCL2L1	chr20-31652607-31653578
ZBTB18	BCL2L1	chr20-31659332-31660170
PRDM1	BCL2L1	chr20-31659332-31660170
ONECUT1	BCL2L1	chr20-31659332-31660170
ZNF83	BCL2L1	chr20-31659332-31660170
PRDM8	BCL2L1	chr20-31661101-31662617
PRDM1	BCL2L1	chr20-31661101-31662617
ONECUT1	BCL2L1	chr20-31661101-31662617
ONECUT3	BCL2L1	chr20-31661101-31662617
ZNF83	BCL2L1	chr20-31661101-31662617
PRDM8	BCL2L1	chr20-31663958-31664451
FOXP2	BCL2L1	chr20-31663958-31664451
SMAD2	BCL2L1	chr20-31663958-31664451
ZNF83	BCL2L1	chr20-31663958-31664451
ZBTB18	BCL2L1	chr20-31666180-31667255
NEUROD1	BCL2L1	chr20-31666180-31667255
THRB	BCL2L1	chr20-31666180-31667255
PRDM8	BCL2L1	chr20-31666180-31667255
DACH1	BCL2L1	chr20-31666180-31667255
RXRG	BCL2L1	chr20-31675687-31676857
NEUROD1	BCL2L1	chr20-31675687-31676857
THRB	BCL2L1	chr20-31675687-31676857
PRDM8	BCL2L1	chr20-31675687-31676857
DACH1	BCL2L1	chr20-31675687-31676857
SMAD2	BCL2L1	chr20-31675687-31676857
ONECUT3	BCL2L1	chr20-31675687-31676857
RXRG	BCL2L1	chr20-31684130-31685463
PRDM8	BCL2L1	chr20-31684130-31685463
RREB1	BCL2L1	chr20-31684130-31685463
PRDM1	BCL2L1	chr20-31684130-31685463
SMAD2	BCL2L1	chr20-31684130-31685463
ZNF83	BCL2L1	chr20-31684130-31685463
RREB1	BCL2L1	chr20-31687473-31688355
SMAD2	BCL2L1	chr20-31687473-31688355
PRDM8	BCL2L1	chr20-31688859-31689769
RREB1	BCL2L1	chr20-31688859-31689769
ZNF83	BCL2L1	chr20-31688859-31689769
NEUROD1	BCL2L1	chr20-31693441-31695036
THRB	BCL2L1	chr20-31693441-31695036
PRDM8	BCL2L1	chr20-31693441-31695036
RREB1	BCL2L1	chr20-31693441-31695036
ZFHX3	BCL2L1	chr20-31693441-31695036
RAX	BCL2L1	chr20-31693441-31695036
ZNF83	BCL2L1	chr20-31693441-31695036
RXRG	BCL2L1	chr20-31698753-31699614
PRDM8	BCL2L1	chr20-31698753-31699614
PRDM1	BCL2L1	chr20-31698753-31699614
FOXP2	BCL2L1	chr20-31698753-31699614
PRDM8	BCL2L1	chr20-31704031-31704850
RREB1	BCL2L1	chr20-31704031-31704850
RXRG	BCL2L1	chr20-31708045-31709424
ZBTB18	BCL2L1	chr20-31708045-31709424
THRB	BCL2L1	chr20-31708045-31709424
PRDM8	BCL2L1	chr20-31708045-31709424
RREB1	BCL2L1	chr20-31708045-31709424
MEIS2	BCL2L1	chr20-31708045-31709424
SMAD2	BCL2L1	chr20-31708045-31709424
ZNF83	BCL2L1	chr20-31708045-31709424
NEUROD1	BCL2L1	chr20-31709971-31711355
PRDM8	BCL2L1	chr20-31709971-31711355
PRDM1	BCL2L1	chr20-31709971-31711355
FOXP2	BCL2L1	chr20-31709971-31711355
ZNF83	BCL2L1	chr20-31709971-31711355
PRDM8	BCL2L1	chr20-31711924-31713374
DACH1	BCL2L1	chr20-31711924-31713374
ZFHX3	BCL2L1	chr20-31711924-31713374
SMAD2	BCL2L1	chr20-31711924-31713374
ZNF83	BCL2L1	chr20-31711924-31713374
RXRG	BCL2L1	chr20-31716021-31716160
PRDM8	BCL2L1	chr20-31716594-31717494
RREB1	BCL2L1	chr20-31716594-31717494
ZNF83	BCL2L1	chr20-31716594-31717494
NEUROD1	BCL2L1	chr20-31718979-31721654
THRB	BCL2L1	chr20-31718979-31721654
PRDM8	BCL2L1	chr20-31718979-31721654
RREB1	BCL2L1	chr20-31718979-31721654
FOXP2	BCL2L1	chr20-31718979-31721654
ZNF83	BCL2L1	chr20-31718979-31721654
ONECUT1	BCL2L1	chr20-31723990-31724773
RAX	BCL2L1	chr20-31723990-31724773
ONECUT3	BCL2L1	chr20-31723990-31724773
PRDM8	BCL2L1	chr20-31738193-31739270
RREB1	BCL2L1	chr20-31738193-31739270
FOXP2	BCL2L1	chr20-31738193-31739270
ZFHX3	BCL2L1	chr20-31738193-31739270
ZNF83	BCL2L1	chr20-31738193-31739270
RXRG	BCL2L1	chr20-31748945-31749879
THRB	BCL2L1	chr20-31779105-31779966
PRDM8	BCL2L1	chr20-31779105-31779966
RREB1	BCL2L1	chr20-31779105-31779966
VSX2	BCL2L1	chr20-31779105-31779966
ZFHX3	BCL2L1	chr20-31779105-31779966
SMAD2	BCL2L1	chr20-31779105-31779966
RAX	BCL2L1	chr20-31779105-31779966
ZNF83	BCL2L1	chr20-31779105-31779966
RXRG	BCL2L1	chr20-31803859-31804815
NEUROD1	BCL2L1	chr20-31803859-31804815
PRDM8	BCL2L1	chr20-31803859-31804815
PRDM1	BCL2L1	chr20-31803859-31804815
SMAD2	BCL2L1	chr20-31803859-31804815
ZBTB18	BCL2L1	chr20-31810119-31811147
NEUROD1	BCL2L1	chr20-31810119-31811147
PRDM8	BCL2L1	chr20-31810119-31811147
FOXP2	BCL2L1	chr20-31810119-31811147
DACH1	BCL2L1	chr20-31810119-31811147
ZBTB18	BCL2L1	chr20-31815183-31816585
PRDM8	BCL2L1	chr20-31815183-31816585
RREB1	BCL2L1	chr20-31815183-31816585
DACH1	BCL2L1	chr20-31815183-31816585
RAX	BCL2L1	chr20-31815183-31816585
ZNF83	BCL2L1	chr20-31815183-31816585
ZBTB18	BCL2L1	chr20-31818710-31819307
THRB	BCL2L1	chr20-31818710-31819307
PRDM8	BCL2L1	chr20-31818710-31819307
PRDM1	BCL2L1	chr20-31818710-31819307
ZNF83	BCL2L1	chr20-31818710-31819307
PRDM8	BCL2L1	chr20-31822317-31823476
RREB1	BCL2L1	chr20-31822317-31823476
MEIS2	BCL2L1	chr20-31822317-31823476
ZNF83	BCL2L1	chr20-31822317-31823476
MYBL1	TPX2	chr20-31661101-31662617
GLI3	TPX2	chr20-31693441-31695036
RXRG	CBFA2T2	chr20-33400694-33401427
MEIS1	CBFA2T2	chr20-33400694-33401427
HES6	CBFA2T2	chr20-33400694-33401427
NFIB	CBFA2T2	chr20-33400694-33401427
CUX2	CBFA2T2	chr20-33401562-33402311
ONECUT1	CBFA2T2	chr20-33401562-33402311
NEUROD1	CBFA2T2	chr20-33410992-33411852
PRDM8	CBFA2T2	chr20-33410992-33411852
RREB1	CBFA2T2	chr20-33410992-33411852
PRDM1	CBFA2T2	chr20-33410992-33411852
NFIB	CBFA2T2	chr20-33415676-33416626
RORB	CBFA2T2	chr20-33415676-33416626
HES6	CBFA2T2	chr20-33433384-33434309
PRDM8	CBFA2T2	chr20-33437244-33438097
NFIB	CBFA2T2	chr20-33437244-33438097
RORB	CBFA2T2	chr20-33437244-33438097
PRDM8	CBFA2T2	chr20-33442432-33443310
RREB1	CBFA2T2	chr20-33442432-33443310
PRDM1	CBFA2T2	chr20-33442432-33443310
NFIB	CBFA2T2	chr20-33442432-33443310
DACH1	CBFA2T2	chr20-33442432-33443310
ONECUT1	CBFA2T2	chr20-33443893-33445229
SMAD2	CBFA2T2	chr20-33443893-33445229
RAX	CBFA2T2	chr20-33443893-33445229
PRDM8	CBFA2T2	chr20-33454594-33455562
ISL1	CBFA2T2	chr20-33454594-33455562
PRDM1	CBFA2T2	chr20-33454594-33455562
SMAD2	CBFA2T2	chr20-33454594-33455562
NEUROD1	CBFA2T2	chr20-33456940-33457854
HES6	CBFA2T2	chr20-33456940-33457854
PRDM8	CBFA2T2	chr20-33456940-33457854
PRDM1	CBFA2T2	chr20-33456940-33457854
NFIB	CBFA2T2	chr20-33456940-33457854
PRDM8	CBFA2T2	chr20-33460018-33460950
RREB1	CBFA2T2	chr20-33460018-33460950
RAX	CBFA2T2	chr20-33460018-33460950
ZBTB18	CBFA2T2	chr20-33462820-33463692
TCF7L1	CBFA2T2	chr20-33462820-33463692
PRDM8	CBFA2T2	chr20-33462820-33463692
RREB1	CBFA2T2	chr20-33462820-33463692
TEAD1	CBFA2T2	chr20-33462820-33463692
TOX3	CBFA2T2	chr20-33462820-33463692
RXRG	CBFA2T2	chr20-33465023-33466355
MEIS1	CBFA2T2	chr20-33465023-33466355
NEUROD1	CBFA2T2	chr20-33465023-33466355
PRDM8	CBFA2T2	chr20-33465023-33466355
ISL1	CBFA2T2	chr20-33465023-33466355
ATOH7	CBFA2T2	chr20-33465023-33466355
SMAD2	CBFA2T2	chr20-33465023-33466355
PRDM8	CBFA2T2	chr20-33472761-33473669
ISL1	CBFA2T2	chr20-33472761-33473669
TEAD1	CBFA2T2	chr20-33472761-33473669
CUX2	CBFA2T2	chr20-33472761-33473669
ONECUT1	CBFA2T2	chr20-33472761-33473669
SMAD2	CBFA2T2	chr20-33472761-33473669
RXRG	CBFA2T2	chr20-33474390-33476509
MEIS1	CBFA2T2	chr20-33474390-33476509
NEUROD1	CBFA2T2	chr20-33474390-33476509
PRDM8	CBFA2T2	chr20-33474390-33476509
RREB1	CBFA2T2	chr20-33474390-33476509
MYBL1	CBFA2T2	chr20-33474390-33476509
NFIB	CBFA2T2	chr20-33474390-33476509
DACH1	CBFA2T2	chr20-33474390-33476509
SMAD2	CBFA2T2	chr20-33474390-33476509
MEIS1	CBFA2T2	chr20-33482320-33483253
NEUROD1	CBFA2T2	chr20-33482320-33483253
PRDM8	CBFA2T2	chr20-33482320-33483253
RREB1	CBFA2T2	chr20-33482320-33483253
FOXP2	CBFA2T2	chr20-33482320-33483253
TEAD1	CBFA2T2	chr20-33482320-33483253
ONECUT1	CBFA2T2	chr20-33482320-33483253
SMAD2	CBFA2T2	chr20-33482320-33483253
RXRG	CBFA2T2	chr20-33488768-33490074
PRDM8	CBFA2T2	chr20-33488768-33490074
ONECUT1	CBFA2T2	chr20-33488768-33490074
NEUROD1	CBFA2T2	chr20-33490302-33491054
RARB	CBFA2T2	chr20-33490302-33491054
PRDM8	CBFA2T2	chr20-33501389-33502304
HES6	CBFA2T2	chr20-33517837-33518705
PRDM8	CBFA2T2	chr20-33517837-33518705
SMAD2	CBFA2T2	chr20-33517837-33518705
ZBTB18	CBFA2T2	chr20-33532922-33533782
TCF7L1	CBFA2T2	chr20-33532922-33533782
NEUROD1	CBFA2T2	chr20-33532922-33533782
FOXP2	CBFA2T2	chr20-33532922-33533782
ATOH7	CBFA2T2	chr20-33532922-33533782
TCF7L2	CBFA2T2	chr20-33532922-33533782
DACH1	CBFA2T2	chr20-33532922-33533782
TOX3	CBFA2T2	chr20-33532922-33533782
RAX	CBFA2T2	chr20-33532922-33533782
NEUROD1	CBFA2T2	chr20-33554680-33555520
ISL1	CBFA2T2	chr20-33554680-33555520
RREB1	CBFA2T2	chr20-33554680-33555520
FOXP2	CBFA2T2	chr20-33554680-33555520
SMAD2	CBFA2T2	chr20-33554680-33555520
FOXP2	CBFA2T2	chr20-33561889-33562333
NFIB	CBFA2T2	chr20-33561889-33562333
ONECUT1	CBFA2T2	chr20-33561889-33562333
TOX3	CBFA2T2	chr20-33561889-33562333
RXRG	CBFA2T2	chr20-33562675-33562835
TCF7L1	CBFA2T2	chr20-33563957-33564824
ISL1	CBFA2T2	chr20-33563957-33564824
NFIB	CBFA2T2	chr20-33563957-33564824
TOX3	CBFA2T2	chr20-33563957-33564824
ZBTB18	CBFA2T2	chr20-33568154-33569158
SOX2	CBFA2T2	chr20-33568154-33569158
PRDM8	CBFA2T2	chr20-33568154-33569158
RREB1	CBFA2T2	chr20-33568154-33569158
CUX2	CBFA2T2	chr20-33568154-33569158
ONECUT1	CBFA2T2	chr20-33568154-33569158
TOX3	CBFA2T2	chr20-33568154-33569158
ZBTB18	CBFA2T2	chr20-33569746-33570553
PRDM8	CBFA2T2	chr20-33576276-33577118
FOXP2	CBFA2T2	chr20-33576276-33577118
NFIB	CBFA2T2	chr20-33576276-33577118
DACH1	CBFA2T2	chr20-33576276-33577118
ZBTB18	CBFA2T2	chr20-33578376-33579231
PRDM8	CBFA2T2	chr20-33578376-33579231
RREB1	CBFA2T2	chr20-33578376-33579231
PRDM1	CBFA2T2	chr20-33578376-33579231
NFIB	CBFA2T2	chr20-33578376-33579231
CUX2	CBFA2T2	chr20-33578376-33579231
ONECUT1	CBFA2T2	chr20-33578376-33579231
RXRG	CBFA2T2	chr20-33580320-33581122
PRDM8	CBFA2T2	chr20-33580320-33581122
ONECUT1	CBFA2T2	chr20-33580320-33581122
RXRG	CBFA2T2	chr20-33581238-33582178
NEUROD1	CBFA2T2	chr20-33581238-33582178
RREB1	CBFA2T2	chr20-33581238-33582178
RORB	CBFA2T2	chr20-33581238-33582178
DACH1	CBFA2T2	chr20-33581238-33582178
RXRG	CBFA2T2	chr20-33598329-33599174
PRDM8	CBFA2T2	chr20-33598329-33599174
TOX3	CBFA2T2	chr20-33598329-33599174
NEUROD1	CBFA2T2	chr20-33604392-33605364
SOX2	CBFA2T2	chr20-33604392-33605364
PRDM8	CBFA2T2	chr20-33604392-33605364
RREB1	CBFA2T2	chr20-33604392-33605364
FOXP2	CBFA2T2	chr20-33604392-33605364
PRDM8	CBFA2T2	chr20-33635148-33636091
PRDM1	CBFA2T2	chr20-33635148-33636091
DACH1	CBFA2T2	chr20-33635148-33636091
NEUROD1	CBFA2T2	chr20-33637980-33638738
TEAD1	CBFA2T2	chr20-33637980-33638738
ATOH7	CBFA2T2	chr20-33639911-33640340
SOX2	CBFA2T2	chr20-33640532-33640763
RXRG	TGIF2	chr20-36477832-36478742
ZBTB18	TGIF2	chr20-36477832-36478742
NEUROD1	TGIF2	chr20-36477832-36478742
PRDM8	TGIF2	chr20-36477832-36478742
NFIB	TGIF2	chr20-36477832-36478742
TEAD1	TGIF2	chr20-36477832-36478742
PRDM8	TGIF2	chr20-36481589-36482548
NR2E1	TGIF2	chr20-36481589-36482548
MYB	TGIF2	chr20-36481589-36482548
CREB5	TGIF2	chr20-36481589-36482548
NFIB	TGIF2	chr20-36481589-36482548
RXRG	TGIF2	chr20-36485205-36486082
ZBTB18	TGIF2	chr20-36485205-36486082
MEIS1	TGIF2	chr20-36485205-36486082
NEUROD1	TGIF2	chr20-36485205-36486082
PRDM8	TGIF2	chr20-36485205-36486082
PRDM1	TGIF2	chr20-36485205-36486082
NR2E1	TGIF2	chr20-36485205-36486082
TCF7L2	TGIF2	chr20-36485205-36486082
ONECUT1	TGIF2	chr20-36485205-36486082
TOX3	TGIF2	chr20-36485205-36486082
SMAD2	TGIF2	chr20-36485205-36486082
HES6	TGIF2	chr20-36493186-36494303
PRDM8	TGIF2	chr20-36493186-36494303
RREB1	TGIF2	chr20-36493186-36494303
RXRG	TGIF2	chr20-36505782-36506586
GLI2	TGIF2	chr20-36505782-36506586
NEUROD1	TGIF2	chr20-36505782-36506586
MYB	TGIF2	chr20-36505782-36506586
CREB5	TGIF2	chr20-36505782-36506586
GLI3	TGIF2	chr20-36505782-36506586
TCF7L1	TGIF2	chr20-36521477-36522432
SOX2	TGIF2	chr20-36521477-36522432
PRDM8	TGIF2	chr20-36521477-36522432
TOX3	TGIF2	chr20-36521477-36522432
NR2E1	TGIF2	chr20-36524771-36525552
HES5	TGIF2	chr20-36526078-36526812
GLI2	TGIF2	chr20-36526078-36526812
SOX2	TGIF2	chr20-36526078-36526812
PRDM8	TGIF2	chr20-36526078-36526812
NR2E1	TGIF2	chr20-36526078-36526812
GLI3	TGIF2	chr20-36526078-36526812
GLIS3	TGIF2	chr20-36526078-36526812
ATOH7	TGIF2	chr20-36526078-36526812
RXRG	TGIF2	chr20-36528638-36530655
NEUROD1	TGIF2	chr20-36528638-36530655
RREB1	TGIF2	chr20-36528638-36530655
NFIB	TGIF2	chr20-36528638-36530655
SMAD2	TGIF2	chr20-36528638-36530655
GLI2	TGIF2	chr20-36540553-36541483
PRDM8	TGIF2	chr20-36540553-36541483
RREB1	TGIF2	chr20-36540553-36541483
NR2E1	TGIF2	chr20-36540553-36541483
GLI3	TGIF2	chr20-36540553-36541483
RXRG	TGIF2	chr20-36541562-36543471
ZBTB18	TGIF2	chr20-36541562-36543471
NEUROD1	TGIF2	chr20-36541562-36543471
SOX2	TGIF2	chr20-36541562-36543471
NFIB	TGIF2	chr20-36541562-36543471
RORB	TGIF2	chr20-36541562-36543471
DACH1	TGIF2	chr20-36541562-36543471
GLI2	TGIF2	chr20-36544051-36544858
PRDM8	TGIF2	chr20-36544051-36544858
RREB1	TGIF2	chr20-36544051-36544858
GLI3	TGIF2	chr20-36544051-36544858
NFIB	TGIF2	chr20-36544051-36544858
TEAD1	TGIF2	chr20-36544051-36544858
HES1	TGIF2	chr20-36547641-36548031
PRDM8	TGIF2	chr20-36547641-36548031
NFIA	TGIF2	chr20-36548194-36548558
NEUROD1	TGIF2	chr20-36548194-36548558
RXRG	TGIF2	chr20-36556275-36557225
HES6	TGIF2	chr20-36556275-36557225
NR2E1	TGIF2	chr20-36556275-36557225
NFIB	TGIF2	chr20-36556275-36557225
SMAD2	TGIF2	chr20-36556275-36557225
RXRG	TGIF2	chr20-36571307-36573487
MEIS1	TGIF2	chr20-36571307-36573487
RARB	TGIF2	chr20-36571307-36573487
ETV5	TGIF2	chr20-36571307-36573487
PRDM8	TGIF2	chr20-36571307-36573487
RREB1	TGIF2	chr20-36571307-36573487
NR2E1	TGIF2	chr20-36571307-36573487
GLI2	TGIF2	chr20-36573746-36574552
NEUROD1	TGIF2	chr20-36573746-36574552
HES1	TGIF2	chr20-36573746-36574552
PRDM1	TGIF2	chr20-36573746-36574552
GLI3	TGIF2	chr20-36573746-36574552
GLIS3	TGIF2	chr20-36573746-36574552
NFIB	TGIF2	chr20-36574849-36575943
SMAD2	TGIF2	chr20-36574849-36575943
RAX	TGIF2	chr20-36574849-36575943
MEIS1	NDRG3	chr20-36571307-36573487
MEIS1	NDRG3	chr20-36642677-36643689
MEIS1	NDRG3	chr20-36711939-36713011
MEIS1	NDRG3	chr20-36717468-36718315
MEIS1	NDRG3	chr20-36739418-36740250
MEIS1	NDRG3	chr20-36740883-36742119
MEIS1	NDRG3	chr20-36772992-36773393
MEIS1	NDRG3	chr20-36823844-36826860
MEIS1	NDRG3	chr20-36832061-36837317
MEIS1	NDRG3	chr20-36844787-36848623
ZBTB18	NNAT	chr20-37419554-37424058
TCF7L1	NNAT	chr20-37419554-37424058
RREB1	NNAT	chr20-37419554-37424058
PRDM1	NNAT	chr20-37419554-37424058
GLI3	NNAT	chr20-37419554-37424058
TEAD1	NNAT	chr20-37419554-37424058
TOX3	NNAT	chr20-37419554-37424058
SMAD2	NNAT	chr20-37419554-37424058
ZNF536	NNAT	chr20-37419554-37424058
NEUROD1	NNAT	chr20-37425752-37426735
RREB1	NNAT	chr20-37425752-37426735
PRDM1	NNAT	chr20-37425752-37426735
GLI3	NNAT	chr20-37425752-37426735
TEAD1	NNAT	chr20-37425752-37426735
SMAD2	NNAT	chr20-37425752-37426735
ZNF536	NNAT	chr20-37425752-37426735
NEUROD1	NNAT	chr20-37430828-37431785
SOX2	NNAT	chr20-37430828-37431785
RREB1	NNAT	chr20-37430828-37431785
ZNF536	NNAT	chr20-37430828-37431785
RREB1	NNAT	chr20-37436594-37437217
NEUROD1	NNAT	chr20-37439307-37440147
NFIB	NNAT	chr20-37439307-37440147
ZNF536	NNAT	chr20-37439307-37440147
RREB1	NNAT	chr20-37441572-37442602
PRDM1	NNAT	chr20-37441572-37442602
GLI3	NNAT	chr20-37441572-37442602
FOXP2	NNAT	chr20-37441572-37442602
CUX2	NNAT	chr20-37441572-37442602
ONECUT1	NNAT	chr20-37441572-37442602
SMAD2	NNAT	chr20-37441572-37442602
ZNF536	NNAT	chr20-37441572-37442602
NEUROD1	NNAT	chr20-37448882-37449932
RARB	NNAT	chr20-37448882-37449932
RREB1	NNAT	chr20-37448882-37449932
TEAD1	NNAT	chr20-37448882-37449932
SMAD2	NNAT	chr20-37448882-37449932
ZNF536	NNAT	chr20-37448882-37449932
ZBTB18	NNAT	chr20-37453325-37454375
MEIS1	NNAT	chr20-37453325-37454375
NEUROD1	NNAT	chr20-37453325-37454375
PRDM1	NNAT	chr20-37453325-37454375
RORB	NNAT	chr20-37453325-37454375
ZNF536	NNAT	chr20-37453325-37454375
NEUROD1	NNAT	chr20-37463756-37464777
CREB5	NNAT	chr20-37463756-37464777
NFIB	NNAT	chr20-37463756-37464777
TOX3	NNAT	chr20-37463756-37464777
NEUROD1	NNAT	chr20-37467570-37468449
RREB1	NNAT	chr20-37467570-37468449
PRDM1	NNAT	chr20-37467570-37468449
RORB	NNAT	chr20-37467570-37468449
ONECUT1	NNAT	chr20-37467570-37468449
SMAD2	NNAT	chr20-37467570-37468449
ZNF536	NNAT	chr20-37467570-37468449
NEUROD1	NNAT	chr20-37468828-37470170
SOX2	NNAT	chr20-37468828-37470170
RREB1	NNAT	chr20-37468828-37470170
MYB	NNAT	chr20-37468828-37470170
DACH1	NNAT	chr20-37468828-37470170
SMAD2	NNAT	chr20-37468828-37470170
ZNF536	NNAT	chr20-37468828-37470170
SOX2	NNAT	chr20-37471554-37472482
RREB1	NNAT	chr20-37471554-37472482
GLI3	NNAT	chr20-37471554-37472482
ONECUT1	NNAT	chr20-37471554-37472482
TOX3	NNAT	chr20-37471554-37472482
SMAD2	NNAT	chr20-37471554-37472482
ZNF536	NNAT	chr20-37471554-37472482
NEUROD1	NNAT	chr20-37473182-37473377
RREB1	NNAT	chr20-37473182-37473377
HES5	NNAT	chr20-37474458-37475876
ZBTB18	NNAT	chr20-37474458-37475876
MEIS1	NNAT	chr20-37474458-37475876
PRDM1	NNAT	chr20-37474458-37475876
GLI3	NNAT	chr20-37474458-37475876
FOXP2	NNAT	chr20-37474458-37475876
SMAD2	NNAT	chr20-37474458-37475876
ZNF536	NNAT	chr20-37474458-37475876
MEIS1	NNAT	chr20-37476606-37477528
RREB1	NNAT	chr20-37476606-37477528
ZFHX3	NNAT	chr20-37476606-37477528
ZBTB18	NNAT	chr20-37504571-37504899
RREB1	NNAT	chr20-37504571-37504899
TCF7L1	NNAT	chr20-37509566-37510385
CREB5	NNAT	chr20-37509566-37510385
NFIB	NNAT	chr20-37509566-37510385
TCF7L2	NNAT	chr20-37509566-37510385
TOX3	NNAT	chr20-37509566-37510385
NFIB	NNAT	chr20-37513438-37514349
TOX3	NNAT	chr20-37513438-37514349
ZFHX3	NNAT	chr20-37513438-37514349
NEUROD1	NNAT	chr20-37516746-37517416
RARB	NNAT	chr20-37516746-37517416
NFIB	NNAT	chr20-37516746-37517416
ONECUT1	NNAT	chr20-37516746-37517416
NEUROD1	NNAT	chr20-37519351-37520235
RREB1	NNAT	chr20-37519351-37520235
SMAD2	NNAT	chr20-37519351-37520235
ZBTB18	VSTM2L	chr20-37803049-37805652
PRDM8	VSTM2L	chr20-37803049-37805652
RREB1	VSTM2L	chr20-37803049-37805652
PRDM1	VSTM2L	chr20-37803049-37805652
FOXP2	VSTM2L	chr20-37803049-37805652
ST18	VSTM2L	chr20-37803049-37805652
NFIB	VSTM2L	chr20-37803049-37805652
ZNF83	VSTM2L	chr20-37803049-37805652
ESRRG	VSTM2L	chr20-37807725-37808844
THRB	VSTM2L	chr20-37807725-37808844
ZNF83	VSTM2L	chr20-37807725-37808844
HES6	VSTM2L	chr20-37812755-37813561
THRB	VSTM2L	chr20-37812755-37813561
VSX2	VSTM2L	chr20-37812755-37813561
ZFHX3	VSTM2L	chr20-37812755-37813561
RAX	VSTM2L	chr20-37812755-37813561
VSX1	VSTM2L	chr20-37812755-37813561
MEIS2	VSTM2L	chr20-37820819-37821642
ONECUT1	VSTM2L	chr20-37820819-37821642
ONECUT3	VSTM2L	chr20-37820819-37821642
ZNF83	VSTM2L	chr20-37820819-37821642
NEUROD1	VSTM2L	chr20-37822929-37824260
PRDM8	VSTM2L	chr20-37822929-37824260
RREB1	VSTM2L	chr20-37822929-37824260
ZNF83	VSTM2L	chr20-37822929-37824260
NEUROD1	VSTM2L	chr20-37828465-37829327
THRB	VSTM2L	chr20-37828465-37829327
NFIB	VSTM2L	chr20-37828465-37829327
MEIS2	VSTM2L	chr20-37828465-37829327
NEUROD1	VSTM2L	chr20-37833025-37834087
RREB1	VSTM2L	chr20-37833025-37834087
[truncated: 264,348+ more rows]

## Sheet: Rod GRN
tf	target	region
TFAP2B	RAD21L1	chr20-1184676-1185137
NEUROG2	RAD21L1	chr20-1203652-1204123
TFAP2B	RAD21L1	chr20-1203652-1204123
TFAP2B	RAD21L1	chr20-1212667-1213728
TFAP2B	RAD21L1	chr20-1225078-1226055
NEUROG2	RAD21L1	chr20-1263662-1264236
NEUROG2	RAD21L1	chr20-1266761-1267516
TFAP2B	RAD21L1	chr20-1274684-1275663
TFAP2B	RAD21L1	chr20-1279623-1280558
EBF1	SNPH	chr20-1185416-1186091
KLF9	SNPH	chr20-1212667-1213728
KLF9	SNPH	chr20-1263662-1264236
EBF1	SNPH	chr20-1266761-1267516
KLF9	SNPH	chr20-1266761-1267516
EBF1	SNPH	chr20-1296422-1297139
EBF1	SNPH	chr20-1302511-1303446
ETS2	C20orf141	chr20-2752546-2753224
ETS2	C20orf141	chr20-2759198-2759267
ZNF695	GNRH2	chr20-2943928-2944918
LHX9	GNRH2	chr20-2947082-2947981
ZNF695	GNRH2	chr20-2947082-2947981
LHX9	GNRH2	chr20-2997896-2998804
ZNF695	GNRH2	chr20-3041272-3042182
ZNF695	GNRH2	chr20-3043666-3044009
TEAD4	UBOX5	chr20-3237277-3237543
ZNF695	SLC4A11	chr20-3159082-3159765
ZNF695	SLC4A11	chr20-3161933-3162616
ZNF695	SLC4A11	chr20-3171988-3173454
ZNF695	SLC4A11	chr20-3204686-3205250
ZNF695	SLC4A11	chr20-3238167-3238547
ZNF695	SLC4A11	chr20-3275078-3276045
GLI2	HSPA12B	chr20-3661290-3662083
ZNF695	HSPA12B	chr20-3665996-3666873
GLI2	HSPA12B	chr20-3665996-3666873
GLI2	HSPA12B	chr20-3673497-3673573
ZNF695	HSPA12B	chr20-3673912-3674063
IRF1	HSPA12B	chr20-3676131-3677066
GLI2	HSPA12B	chr20-3677144-3677954
IRF1	HSPA12B	chr20-3682247-3682849
GLI2	HSPA12B	chr20-3686403-3686969
ZNF695	HSPA12B	chr20-3729995-3732666
GLI2	HSPA12B	chr20-3729995-3732666
IRF1	HSPA12B	chr20-3729995-3732666
GLI2	HSPA12B	chr20-3744788-3744901
GLI2	HSPA12B	chr20-3748392-3749231
ZEB1	RNF24	chr20-3845904-3846798
TBX3	RNF24	chr20-4013848-4015144
ZEB1	RNF24	chr20-4019403-4020258
ZEB1	RNF24	chr20-4021036-4021971
ZEB1	RNF24	chr20-4027063-4027834
ZEB1	RNF24	chr20-4035790-4036752
ZEB1	RNF24	chr20-4046213-4047058
ZEB1	RNF24	chr20-4084948-4088025
TBX3	RNF24	chr20-4084948-4088025
ZEB1	RNF24	chr20-4091454-4092463
TBX3	RNF24	chr20-4105299-4106197
ZEB1	RNF24	chr20-4108337-4109279
MYBL1	RNF24	chr20-4113958-4114981
ID3	PCNA	chr20-5024579-5025437
ZNF367	PCNA	chr20-5024579-5025437
ZEB1	PCNA	chr20-5028185-5029169
ONECUT2	PCNA	chr20-5028185-5029169
MYBL1	PCNA	chr20-5048000-5048900
HES6	PCNA	chr20-5050322-5051107
ZNF367	PCNA	chr20-5050322-5051107
ONECUT2	PCNA	chr20-5050322-5051107
ID3	PCNA	chr20-5055826-5056759
HES6	PCNA	chr20-5055826-5056759
ID3	PCNA	chr20-5095739-5096818
FOXM1	PCNA	chr20-5112277-5112719
ZEB1	PCNA	chr20-5113104-5113765
E2F8	PCNA	chr20-5113104-5113765
E2F7	PCNA	chr20-5113104-5113765
E2F2	PCNA	chr20-5118867-5119577
E2F8	PCNA	chr20-5118867-5119577
E2F7	PCNA	chr20-5118867-5119577
ZEB1	PCNA	chr20-5125836-5126499
FOXM1	PCNA	chr20-5125836-5126499
TSHZ3	PCNA	chr20-5125836-5126499
ZNF367	PCNA	chr20-5127150-5128149
ID3	PCNA	chr20-5150234-5151234
ZEB1	PCNA	chr20-5150234-5151234
FOXM1	PCNA	chr20-5150234-5151234
FOXM1	PCNA	chr20-5155342-5156356
PBX4	PCNA	chr20-5166408-5167742
LHX9	PCNA	chr20-5168730-5169641
ZEB1	PCNA	chr20-5168730-5169641
ZEB1	PCNA	chr20-5170982-5172111
ID3	PCNA	chr20-5202105-5203125
ZEB1	PCNA	chr20-5202105-5203125
ID3	PCNA	chr20-5205119-5207097
HES6	PCNA	chr20-5205119-5207097
FOXM1	PCNA	chr20-5205119-5207097
TSHZ3	PCNA	chr20-5205119-5207097
ZEB1	PCNA	chr20-5216331-5217390
FOS	PCNA	chr20-5216331-5217390
ZEB1	PCNA	chr20-5222767-5224597
ZEB1	MCM8	chr20-5864284-5865065
MYBL1	MCM8	chr20-5883463-5884331
MEF2C	MCM8	chr20-5894154-5894611
MEF2C	MCM8	chr20-5979339-5980263
ZEB1	MCM8	chr20-5992252-5993210
ZEB1	BMP2	chr20-6715701-6716487
SOX11	PLCB1	chr20-7976793-7977347
SOX11	PLCB1	chr20-7982622-7983276
MEF2C	PLCB1	chr20-7982622-7983276
LHX4	PLCB1	chr20-7985645-7986573
MEF2C	PLCB1	chr20-7985645-7986573
HMGA2	PLCB1	chr20-7985645-7986573
SOX11	PLCB1	chr20-8004819-8005757
SOX11	PLCB1	chr20-8012440-8013369
SOX11	PLCB1	chr20-8018107-8018792
EGR1	PLCB1	chr20-8018107-8018792
SMAD7	PLCB1	chr20-8018107-8018792
LHX4	PLCB1	chr20-8019830-8020810
MEF2C	PLCB1	chr20-8019830-8020810
ZEB1	PLCB1	chr20-8019830-8020810
SOX11	PLCB1	chr20-8027167-8028108
MEF2C	PLCB1	chr20-8027167-8028108
EGR1	PLCB1	chr20-8027167-8028108
HMGA2	PLCB1	chr20-8027167-8028108
LHX4	PLCB1	chr20-8037983-8039061
HMGA2	PLCB1	chr20-8037983-8039061
SMAD7	PLCB1	chr20-8037983-8039061
SOX11	PLCB1	chr20-8043508-8044435
MEF2C	PLCB1	chr20-8043508-8044435
ZEB1	PLCB1	chr20-8043508-8044435
HMGA2	PLCB1	chr20-8043508-8044435
SOX11	PLCB1	chr20-8054772-8055720
SOX11	PLCB1	chr20-8065170-8066028
MEF2C	PLCB1	chr20-8082769-8083678
SOX11	PLCB1	chr20-8092732-8093599
MEF2C	PLCB1	chr20-8092732-8093599
SMAD7	PLCB1	chr20-8092732-8093599
LHX4	PLCB1	chr20-8115957-8117494
SOX11	PLCB1	chr20-8115957-8117494
SMAD7	PLCB1	chr20-8115957-8117494
SOX11	PLCB1	chr20-8210827-8211510
SOX11	PLCB1	chr20-8213799-8214695
LHX4	PLCB1	chr20-8304030-8305117
SOX11	PLCB1	chr20-8304030-8305117
EGR1	PLCB1	chr20-8304030-8305117
ZEB1	PLCB1	chr20-8305374-8305673
SOX11	PLCB1	chr20-8306748-8307749
MEF2C	PLCB1	chr20-8306748-8307749
SOX11	PLCB1	chr20-8309246-8310162
MEF2C	PLCB1	chr20-8309246-8310162
HMGA2	PLCB1	chr20-8309246-8310162
SOX11	PLCB1	chr20-8330976-8331879
HMGA2	PLCB1	chr20-8330976-8331879
PROX1	PLCB1	chr20-8360840-8361895
SOX11	PLCB1	chr20-8360840-8361895
HMGA2	PLCB1	chr20-8385010-8385971
SMAD7	PLCB1	chr20-8385010-8385971
LHX4	PLCB1	chr20-8414587-8415505
PROX1	PLCB1	chr20-8414587-8415505
HMGA2	PLCB1	chr20-8432510-8433297
SOX11	PLCB1	chr20-8469860-8470726
LHX4	PLCB1	chr20-8473244-8474235
PROX1	PLCB1	chr20-8473244-8474235
HES6	PLCB1	chr20-8473244-8474235
MEF2C	PLCB1	chr20-8473244-8474235
SOX11	PLCB1	chr20-8475623-8476677
HMGA2	PLCB1	chr20-8475623-8476677
SOX11	PLCB1	chr20-8485195-8486163
SOX11	PLCB1	chr20-8518699-8519656
LHX4	PLCB1	chr20-8523322-8524238
SOX11	PLCB1	chr20-8523322-8524238
MEF2C	PLCB1	chr20-8524300-8525168
SOX11	PLCB1	chr20-8541875-8542762
SOX11	PLCB1	chr20-8572158-8573128
LHX4	PLCB1	chr20-8602128-8602988
HMGA2	PLCB1	chr20-8661170-8662063
MEF2C	PLCB1	chr20-8670695-8671485
SMAD7	PLCB1	chr20-8670695-8671485
LHX4	PLCB1	chr20-8720803-8721679
HMGA2	PLCB1	chr20-8720803-8721679
HMGA2	PLCB1	chr20-8722099-8722353
SOX11	PLCB1	chr20-8722422-8723023
MEF2C	PLCB1	chr20-8722422-8723023
SOX11	PLCB1	chr20-8753317-8754346
MEF2C	PLCB1	chr20-8753317-8754346
LHX4	PLCB1	chr20-8759385-8760321
MEF2C	PLCB1	chr20-8759385-8760321
SOX11	PLCB1	chr20-8790262-8791117
MEF2C	PLCB1	chr20-8790262-8791117
PROX1	PLCB1	chr20-8849768-8850714
LHX4	PLCB1	chr20-8853493-8854876
PROX1	PLCB1	chr20-8853493-8854876
SOX11	PLCB1	chr20-8853493-8854876
MEF2C	PLCB1	chr20-8853493-8854876
HMGA2	PLCB1	chr20-8853493-8854876
LHX4	PLCB1	chr20-8866786-8867913
HMGA2	PLCB1	chr20-8941219-8942095
HMGA2	PLCB1	chr20-8946223-8947161
SOX11	PLCB1	chr20-8949719-8950709
SOX11	PLCB1	chr20-8964780-8965089
HMGA2	PLCB4	chr20-8996758-8998719
HMGA2	PLCB4	chr20-9028046-9028951
ZEB1	PLCB4	chr20-9050249-9051188
HMGA2	PLCB4	chr20-9050249-9051188
ZEB1	PLCB4	chr20-9066189-9068762
HMGA2	PLCB4	chr20-9066189-9068762
ZEB1	PLCB4	chr20-9078950-9079849
HMGA2	PLCB4	chr20-9078950-9079849
HMGA2	PLCB4	chr20-9094394-9095380
HMGA2	PLCB4	chr20-9100549-9101437
HMGA2	PLCB4	chr20-9107745-9108828
ZEB1	PLCB4	chr20-9114422-9115182
HMGA2	PLCB4	chr20-9122293-9123264
HMGA2	PLCB4	chr20-9185266-9186202
HMGA2	PLCB4	chr20-9220681-9221490
HMGA2	PLCB4	chr20-9277036-9278033
ZEB1	PLCB4	chr20-9318721-9319501
HMGA2	PLCB4	chr20-9318721-9319501
HMGA2	PLCB4	chr20-9324244-9325069
HMGA2	PLCB4	chr20-9325360-9326387
HMGA2	PLCB4	chr20-9331766-9332807
ZEB1	PLCB4	chr20-9359390-9360399
HMGA2	PLCB4	chr20-9359390-9360399
HMGA2	PLCB4	chr20-9393679-9393914
HMGA2	PLCB4	chr20-9408059-9408632
HMGA2	PLCB4	chr20-9409182-9409727
HMGA2	PLCB4	chr20-9442642-9443531
HMGA2	PLCB4	chr20-9467643-9468570
EGR1	LAMP5	chr20-9506226-9509295
ZEB1	LAMP5	chr20-9506226-9509295
EGR1	LAMP5	chr20-9515626-9515999
NR4A1	LAMP5	chr20-9516362-9516767
ZEB1	LAMP5	chr20-9520006-9521417
MYT1L	PAK5	chr20-9467643-9468570
PRDM13	PAK5	chr20-9467643-9468570
FOS	PAK5	chr20-9494342-9495177
PRDM13	PAK5	chr20-9506226-9509295
PRDM13	PAK5	chr20-9513960-9514357
KLF9	PAK5	chr20-9516132-9516255
KLF9	PAK5	chr20-9520006-9521417
FOS	PAK5	chr20-9520006-9521417
PRDM13	PAK5	chr20-9571511-9572204
MYT1L	PAK5	chr20-9572269-9575329
PRDM13	PAK5	chr20-9572269-9575329
KLF9	PAK5	chr20-9572269-9575329
PRDM13	PAK5	chr20-9600137-9601219
PRDM13	PAK5	chr20-9602609-9603446
FOS	PAK5	chr20-9608410-9610567
PRDM13	PAK5	chr20-9837613-9838761
KLF9	PAK5	chr20-9837613-9838761
MYT1L	PAK5	chr20-9839042-9839796
FOS	PAK5	chr20-9925715-9926626
HMGA2	JAG1	chr20-10540244-10541215
HMGA2	JAG1	chr20-10544749-10545445
MEF2C	JAG1	chr20-10545870-10546834
ZEB1	JAG1	chr20-10545870-10546834
MEF2C	JAG1	chr20-10551491-10552532
HMGA2	JAG1	chr20-10551491-10552532
ZNF367	JAG1	chr20-10553088-10554014
HMGA2	JAG1	chr20-10553088-10554014
HMGA2	JAG1	chr20-10555537-10556230
MEF2C	JAG1	chr20-10603230-10605061
HMGA2	JAG1	chr20-10603230-10605061
ZNF367	JAG1	chr20-10610914-10612017
MEF2C	JAG1	chr20-10618527-10620369
HMGA2	JAG1	chr20-10618527-10620369
MEF2C	JAG1	chr20-10629713-10630778
ZEB1	JAG1	chr20-10629713-10630778
ZNF367	JAG1	chr20-10636093-10636295
HMGA2	JAG1	chr20-10636093-10636295
HMGA2	JAG1	chr20-10639956-10640782
ZEB1	JAG1	chr20-10644980-10645142
MEF2C	JAG1	chr20-10650361-10651232
ZEB1	JAG1	chr20-10650361-10651232
E2F7	JAG1	chr20-10650361-10651232
ZNF367	JAG1	chr20-10651695-10652130
HMGA2	JAG1	chr20-10652723-10654144
ZNF367	JAG1	chr20-10654551-10656370
HMGA2	JAG1	chr20-10654551-10656370
E2F7	JAG1	chr20-10654551-10656370
ZEB1	JAG1	chr20-10665289-10666250
ZNF367	JAG1	chr20-10670666-10672700
ZEB1	JAG1	chr20-10670666-10672700
HMGA2	JAG1	chr20-10670666-10672700
MEF2C	JAG1	chr20-10686353-10687362
E2F7	JAG1	chr20-10686353-10687362
ZNF367	JAG1	chr20-10708004-10708947
HMGA2	JAG1	chr20-10708004-10708947
THAP8	LINC00687	chr20-11735933-11736810
THAP8	LINC00687	chr20-11919177-11919276
SOX11	SPTLC3	chr20-12916720-12917920
LEF1	SPTLC3	chr20-12916720-12917920
PBX4	SPTLC3	chr20-12916720-12917920
SOX11	SPTLC3	chr20-12918625-12919524
ZEB1	SPTLC3	chr20-12918625-12919524
HMGA2	SPTLC3	chr20-12918625-12919524
SOX11	SPTLC3	chr20-12923459-12924731
HMGA2	SPTLC3	chr20-12923459-12924731
ZEB1	SPTLC3	chr20-12924909-12925847
PBX4	SPTLC3	chr20-12924909-12925847
SOX11	SPTLC3	chr20-12960608-12961531
SOX11	SPTLC3	chr20-12965134-12967535
LEF1	SPTLC3	chr20-12965134-12967535
HMGA2	SPTLC3	chr20-12965134-12967535
LEF1	SPTLC3	chr20-12969956-12971071
ZNF367	SPTLC3	chr20-12969956-12971071
LHX4	SPTLC3	chr20-13003220-13004183
HMGA2	SPTLC3	chr20-13003220-13004183
PBX4	SPTLC3	chr20-13003220-13004183
ID3	SPTLC3	chr20-13008432-13008978
SOX11	SPTLC3	chr20-13009494-13010495
ZNF367	SPTLC3	chr20-13009494-13010495
ZEB1	SPTLC3	chr20-13009494-13010495
HMGA2	SPTLC3	chr20-13009494-13010495
ID3	SPTLC3	chr20-13041560-13042535
SOX11	SPTLC3	chr20-13041560-13042535
SOX11	SPTLC3	chr20-13096851-13097722
HMGA2	SPTLC3	chr20-13103602-13104557
SOX11	SPTLC3	chr20-13105818-13106718
LEF1	SPTLC3	chr20-13105818-13106718
ID3	SPTLC3	chr20-13110648-13111514
HMGA2	SPTLC3	chr20-13110648-13111514
LHX4	SPTLC3	chr20-13115331-13116643
SOX11	SPTLC3	chr20-13115331-13116643
ZNF367	SPTLC3	chr20-13115331-13116643
SOX11	SPTLC3	chr20-13119244-13120179
ST18	ISM1	chr20-13261634-13263634
ST18	ISM1	chr20-13295823-13296793
MYBL2	SEL1L2	chr20-13787906-13788588
LHX4	MACROD2	chr20-13928625-13929585
HMGA2	MACROD2	chr20-13928625-13929585
HMGA2	MACROD2	chr20-13990617-13991278
HES6	MACROD2	chr20-13995810-13996319
LHX4	MACROD2	chr20-14054989-14055928
HMGA2	MACROD2	chr20-14054989-14055928
HMGA2	MACROD2	chr20-14141851-14142787
LHX4	MACROD2	chr20-14155365-14156196
HMGA2	MACROD2	chr20-14155365-14156196
HMGA2	MACROD2	chr20-14189629-14190529
LHX4	MACROD2	chr20-14293767-14294717
LHX4	MACROD2	chr20-14334217-14335839
HMGA2	MACROD2	chr20-14334217-14335839
ONECUT3	MACROD2	chr20-14334217-14335839
ONECUT3	MACROD2	chr20-14336662-14337403
HMGA2	MACROD2	chr20-14337617-14338127
HMGA2	MACROD2	chr20-14344496-14345410
HMGA2	MACROD2	chr20-14373950-14374911
LHX4	MACROD2	chr20-14393321-14394275
HMGA2	MACROD2	chr20-14393321-14394275
HMGA2	MACROD2	chr20-14401342-14402411
HMGA2	MACROD2	chr20-14449350-14450272
HMGA2	MACROD2	chr20-14498567-14499504
LHX4	MACROD2	chr20-14566934-14569167
HMGA2	MACROD2	chr20-14566934-14569167
HMGA2	MACROD2	chr20-14575884-14576856
ONECUT3	MACROD2	chr20-14575884-14576856
HMGA2	MACROD2	chr20-14582017-14583207
ONECUT3	MACROD2	chr20-14582017-14583207
LHX4	MACROD2	chr20-14597428-14598383
HMGA2	MACROD2	chr20-14597428-14598383
HMGA2	MACROD2	chr20-14599296-14600262
HMGA2	MACROD2	chr20-14602435-14603279
HMGA2	MACROD2	chr20-14685080-14685942
HMGA2	MACROD2	chr20-14687625-14688574
LHX4	MACROD2	chr20-14692855-14693743
HMGA2	MACROD2	chr20-14716031-14717077
HMGA2	MACROD2	chr20-14740221-14741127
LHX4	MACROD2	chr20-14799323-14800122
HMGA2	MACROD2	chr20-14799323-14800122
LHX4	MACROD2	chr20-14800615-14801580
HMGA2	MACROD2	chr20-14800615-14801580
HMGA2	MACROD2	chr20-14820477-14821399
LHX4	MACROD2	chr20-14824417-14826070
ONECUT3	MACROD2	chr20-14826619-14827657
HMGA2	MACROD2	chr20-14829788-14830763
HES6	MACROD2	chr20-14838324-14839349
HMGA2	MACROD2	chr20-14838324-14839349
HMGA2	MACROD2	chr20-14859998-14861019
HMGA2	MACROD2	chr20-14864579-14865502
ONECUT3	MACROD2	chr20-14880134-14881071
HMGA2	MACROD2	chr20-14887777-14888142
LHX4	MACROD2	chr20-14913462-14914402
HES6	MACROD2	chr20-14913462-14914402
HMGA2	MACROD2	chr20-14913462-14914402
HMGA2	MACROD2	chr20-14953308-14954168
LHX4	MACROD2	chr20-14955055-14957014
HMGA2	MACROD2	chr20-14955055-14957014
ONECUT3	MACROD2	chr20-14955055-14957014
LHX4	MACROD2	chr20-15006328-15007340
HMGA2	MACROD2	chr20-15006328-15007340
HMGA2	MACROD2	chr20-15012289-15013399
HMGA2	MACROD2	chr20-15044901-15045794
HMGA2	MACROD2	chr20-15061114-15062074
HMGA2	MACROD2	chr20-15076609-15077459
LHX4	MACROD2	chr20-15082772-15083647
HMGA2	MACROD2	chr20-15082772-15083647
LHX4	MACROD2	chr20-15252061-15253027
HMGA2	MACROD2	chr20-15515467-15516368
HMGA2	MACROD2	chr20-15555701-15556755
HMGA2	MACROD2	chr20-15557444-15558376
HMGA2	MACROD2	chr20-15563608-15564659
HES6	MACROD2	chr20-15565515-15566482
HMGA2	MACROD2	chr20-15565515-15566482
HMGA2	MACROD2	chr20-15568092-15568999
HMGA2	MACROD2	chr20-15585697-15586592
HMGA2	MACROD2	chr20-15653840-15654853
HMGA2	MACROD2	chr20-15658030-15658980
HMGA2	MACROD2	chr20-15708700-15709577
LHX4	MACROD2	chr20-15794350-15795390
ONECUT3	MACROD2	chr20-15805859-15806831
HMGA2	MACROD2	chr20-15811554-15812558
HMGA2	MACROD2	chr20-15823459-15824405
ONECUT3	MACROD2	chr20-15823459-15824405
LHX4	MACROD2	chr20-15842859-15843829
HMGA2	MACROD2	chr20-15842859-15843829
HMGA2	MACROD2	chr20-15847181-15848060
LHX4	MACROD2	chr20-15848086-15848660
LHX4	MACROD2	chr20-15854597-15855536
HMGA2	MACROD2	chr20-15888877-15890031
HMGA2	MACROD2	chr20-15899548-15900607
HMGA2	MACROD2	chr20-15905525-15906447
HMGA2	MACROD2	chr20-15929999-15930965
LHX4	MACROD2	chr20-15961815-15962630
LHX4	MACROD2	chr20-15975878-15976983
LHX4	MACROD2	chr20-16005413-16006389
LHX4	MACROD2	chr20-16026898-16027471
HMGA2	MACROD2	chr20-16027481-16028424
HMGA2	MACROD2	chr20-16033842-16034854
LHX4	MACROD2	chr20-16036047-16037179
HMGA2	MACROD2	chr20-16036047-16037179
MEF2C	KIF16B	chr20-16236618-16237711
ZEB1	KIF16B	chr20-16241610-16242502
ZEB1	KIF16B	chr20-16348633-16349405
PROX1	KIF16B	chr20-16349694-16351891
HES6	KIF16B	chr20-16349694-16351891
MEF2C	KIF16B	chr20-16349694-16351891
ZEB1	KIF16B	chr20-16349694-16351891
HES6	KIF16B	chr20-16433516-16434846
MEF2C	KIF16B	chr20-16433516-16434846
ZEB1	KIF16B	chr20-16457253-16458177
HES6	KIF16B	chr20-16485398-16486237
MEF2C	KIF16B	chr20-16485398-16486237
MEF2C	KIF16B	chr20-16508347-16509118
MEF2C	KIF16B	chr20-16512924-16513315
PROX1	KIF16B	chr20-16547402-16548868
ZEB1	KIF16B	chr20-16547402-16548868
MEF2C	KIF16B	chr20-16573435-16576067
ZEB1	KIF16B	chr20-16573435-16576067
HES6	KIF16B	chr20-16577161-16578096
MEF2C	KIF16B	chr20-16577161-16578096
ZEB1	KIF16B	chr20-16577161-16578096
ZEB1	KIF16B	chr20-16607651-16608547
MEF2C	KIF16B	chr20-16614886-16615800
MEF2C	KIF16B	chr20-16634238-16635130
MEF2C	KIF16B	chr20-16671724-16672540
HMGA2	PCSK2	chr20-17140377-17141224
LHX4	PCSK2	chr20-17149361-17150873
SMAD7	PCSK2	chr20-17158618-17159699
ATOH7	PCSK2	chr20-17161498-17162531
HMGA2	PCSK2	chr20-17169407-17170413
SMAD7	PCSK2	chr20-17169407-17170413
LHX4	PCSK2	chr20-17172639-17173629
HMGA2	PCSK2	chr20-17172639-17173629
ST18	PCSK2	chr20-17176878-17177902
NFIB	PCSK2	chr20-17176878-17177902
NFIB	PCSK2	chr20-17179429-17180443
HMGA2	PCSK2	chr20-17202451-17203380
LHX4	PCSK2	chr20-17222148-17223011
HMGA2	PCSK2	chr20-17222148-17223011
NFIB	PCSK2	chr20-17225252-17226106
HMGA2	PCSK2	chr20-17225252-17226106
LHX4	PCSK2	chr20-17227483-17228130
ZEB1	PCSK2	chr20-17228303-17229232
HMGA2	PCSK2	chr20-17233196-17234189
HMGA2	PCSK2	chr20-17242312-17243389
ATOH7	PCSK2	chr20-17248328-17248475
HMGA2	PCSK2	chr20-17266843-17267737
LHX4	PCSK2	chr20-17281124-17283222
HMGA2	PCSK2	chr20-17281124-17283222
LHX4	PCSK2	chr20-17295148-17296462
SMAD7	PCSK2	chr20-17295148-17296462
ZEB1	PCSK2	chr20-17299789-17300757
HMGA2	PCSK2	chr20-17299789-17300757
ST18	PCSK2	chr20-17314007-17317392
SMAD7	PCSK2	chr20-17314007-17317392
LHX4	PCSK2	chr20-17334391-17335295
NFIB	PCSK2	chr20-17334391-17335295
HMGA2	PCSK2	chr20-17334391-17335295
HMGA2	PCSK2	chr20-17341061-17341973
NFIB	PCSK2	chr20-17343491-17344607
LHX4	PCSK2	chr20-17344949-17345660
ST18	PCSK2	chr20-17344949-17345660
ATOH7	PCSK2	chr20-17344949-17345660
HMGA2	PCSK2	chr20-17344949-17345660
LHX4	PCSK2	chr20-17346739-17347763
LHX4	PCSK2	chr20-17349974-17350976
HMGA2	PCSK2	chr20-17349974-17350976
NFIB	PCSK2	chr20-17355368-17356239
HMGA2	PCSK2	chr20-17355368-17356239
HMGA2	PCSK2	chr20-17358441-17359328
NFIB	PCSK2	chr20-17361042-17362003
HMGA2	PCSK2	chr20-17361042-17362003
SMAD7	PCSK2	chr20-17361042-17362003
NFIB	PCSK2	chr20-17368554-17369239
LHX4	PCSK2	chr20-17372755-17373577
HMGA2	PCSK2	chr20-17372755-17373577
HMGA2	PCSK2	chr20-17377023-17377948
HMGA2	PCSK2	chr20-17388381-17389238
LHX4	PCSK2	chr20-17391117-17392184
HMGA2	PCSK2	chr20-17391117-17392184
HMGA2	PCSK2	chr20-17399146-17400026
NFIB	PCSK2	chr20-17418222-17419076
ST18	PCSK2	chr20-17419270-17420238
HMGA2	PCSK2	chr20-17419270-17420238
HMGA2	PCSK2	chr20-17431440-17432325
SMAD7	PCSK2	chr20-17431440-17432325
ZEB1	PCSK2	chr20-17443130-17443951
HMGA2	PCSK2	chr20-17448706-17449653
SMAD7	PCSK2	chr20-17448706-17449653
ST18	PCSK2	chr20-17452065-17452939
ZEB1	PCSK2	chr20-17452065-17452939
NFIB	PCSK2	chr20-17455751-17456347
ZEB1	PCSK2	chr20-17455751-17456347
HMGA2	PCSK2	chr20-17455751-17456347
ST18	PCSK2	chr20-17456803-17457815
NFIB	PCSK2	chr20-17466825-17467744
HMGA2	PCSK2	chr20-17466825-17467744
HMGA2	PCSK2	chr20-17478849-17479820
VSX1	BANF2	chr20-17682296-17683303
E2F7	OVOL2	chr20-17866924-17868027
E2F7	OVOL2	chr20-17894814-17897302
E2F7	OVOL2	chr20-17925128-17926111
E2F7	OVOL2	chr20-17995785-17996560
E2F7	MGME1	chr20-17894814-17897302
E2F7	MGME1	chr20-17925128-17926111
MYBL1	MGME1	chr20-17966338-17967687
HES6	DZANK1	chr20-18349990-18350764
HES6	DZANK1	chr20-18504256-18505100
NR1I3	DTD1	chr20-18566797-18567346
NR1I3	DTD1	chr20-18674352-18675347
ID3	SLC24A3	chr20-19131138-19132105
SOX11	SLC24A3	chr20-19211265-19212645
GLI2	SLC24A3	chr20-19211265-19212645
ZEB1	SLC24A3	chr20-19211265-19212645
SMAD9	SLC24A3	chr20-19211265-19212645
HES6	SLC24A3	chr20-19212985-19213595
ID3	SLC24A3	chr20-19216481-19217284
LEF1	SLC24A3	chr20-19216481-19217284
HMGA2	SLC24A3	chr20-19216481-19217284
ZNF367	SLC24A3	chr20-19249630-19250420
PBX4	SLC24A3	chr20-19275402-19276370
ID3	SLC24A3	chr20-19319618-19320728
LHX4	SLC24A3	chr20-19319618-19320728
SOX11	SLC24A3	chr20-19319618-19320728
SMAD9	SLC24A3	chr20-19319618-19320728
LHX4	SLC24A3	chr20-19338660-19339505
HMGA2	SLC24A3	chr20-19338660-19339505
ZNF367	SLC24A3	chr20-19347805-19348754
LHX4	SLC24A3	chr20-19361790-19362690
GLI2	SLC24A3	chr20-19361790-19362690
ID3	SLC24A3	chr20-19375039-19375805
ZEB1	SLC24A3	chr20-19375039-19375805
HMGA2	SLC24A3	chr20-19375039-19375805
SOX11	SLC24A3	chr20-19376261-19377486
GLI2	SLC24A3	chr20-19376261-19377486
ZNF367	SLC24A3	chr20-19376261-19377486
HMGA2	SLC24A3	chr20-19376261-19377486
PBX4	SLC24A3	chr20-19376261-19377486
ID3	SLC24A3	chr20-19381668-19384079
SOX11	SLC24A3	chr20-19381668-19384079
HES6	SLC24A3	chr20-19381668-19384079
LHX4	SLC24A3	chr20-19385105-19386066
SOX11	SLC24A3	chr20-19385105-19386066
HMGA2	SLC24A3	chr20-19385105-19386066
ID3	SLC24A3	chr20-19390222-19390613
SOX11	SLC24A3	chr20-19429404-19430407
ZNF367	SLC24A3	chr20-19440555-19441458
ID3	SLC24A3	chr20-19456395-19457126
SOX11	SLC24A3	chr20-19465665-19467316
SOX11	SLC24A3	chr20-19473513-19474533
GLI2	SLC24A3	chr20-19473513-19474533
SOX11	SLC24A3	chr20-19511798-19512669
SOX11	SLC24A3	chr20-19512698-19513712
SOX11	SLC24A3	chr20-19529791-19530699
LEF1	SLC24A3	chr20-19533587-19534223
LHX4	SLC24A3	chr20-19547235-19548051
SOX11	SLC24A3	chr20-19547235-19548051
ZEB1	SLC24A3	chr20-19552070-19553175
HMGA2	SLC24A3	chr20-19552070-19553175
ID3	SLC24A3	chr20-19560791-19563166
LHX4	SLC24A3	chr20-19560791-19563166
SOX11	SLC24A3	chr20-19560791-19563166
LEF1	SLC24A3	chr20-19560791-19563166
HMGA2	SLC24A3	chr20-19560791-19563166
PBX4	SLC24A3	chr20-19560791-19563166
ID3	SLC24A3	chr20-19582445-19584441
ZNF367	SLC24A3	chr20-19582445-19584441
HMGA2	SLC24A3	chr20-19582445-19584441
LHX4	SLC24A3	chr20-19587906-19588803
SOX11	SLC24A3	chr20-19587906-19588803
ZNF367	SLC24A3	chr20-19614390-19615360
SOX11	SLC24A3	chr20-19654458-19655623
GLI2	SLC24A3	chr20-19654458-19655623
LEF1	SLC24A3	chr20-19654458-19655623
ID3	SLC24A3	chr20-19661843-19662998
GLI2	SLC24A3	chr20-19661843-19662998
HES6	SLC24A3	chr20-19661843-19662998
HMGA2	SLC24A3	chr20-19661843-19662998
HMGA2	SLC24A3	chr20-19667538-19668499
HMGA2	SLC24A3	chr20-19683354-19683829
ZEB1	SLC24A3	chr20-19692288-19693208
SOX11	SLC24A3	chr20-19704249-19705915
ID3	SLC24A3	chr20-19710042-19711136
PROX1	SLC24A3	chr20-19712576-19713684
LEF1	SLC24A3	chr20-19712576-19713684
ID3	SLC24A3	chr20-19719034-19720161
LEF1	SLC24A3	chr20-19719034-19720161
ZEB1	SLC24A3	chr20-19719034-19720161
NFIA	CFAP61	chr20-19960812-19961725
NFIA	CFAP61	chr20-19975788-19977730
NFIA	CFAP61	chr20-19990364-19992142
NFIA	CFAP61	chr20-20071005-20072035
NFIA	CFAP61	chr20-20073934-20074301
NFIA	CFAP61	chr20-20084767-20085461
NFIA	CFAP61	chr20-20317094-20319556
FOXM1	LINC00261	chr20-22448967-22449434
FOXM1	LINC00261	chr20-22462983-22464070
FOXM1	LINC00261	chr20-22490161-22491568
FOXM1	LINC00261	chr20-22499326-22500291
FOXM1	LINC00261	chr20-22512284-22513224
FOXM1	LINC00261	chr20-22544032-22544940
FOXM1	LINC00261	chr20-22559072-22560552
FOXM1	LINC00261	chr20-22570759-22571790
FOXM1	LINC00261	chr20-22585456-22587407
FOXM1	LINC00261	chr20-22652362-22653346
ZNF367	CST4	chr20-23604014-23604976
ST18	CST4	chr20-23614129-23615021
ZNF600	GGTLC1	chr20-23918797-23922504
ZNF600	GGTLC1	chr20-23974309-23975410
ZNF600	GGTLC1	chr20-23978135-23979075
ZNF600	GGTLC1	chr20-23993245-23994607
LEF1	SYNDIG1	chr20-24372842-24374021
LEF1	SYNDIG1	chr20-24381722-24384511
ZEB1	SYNDIG1	chr20-24381722-24384511
ZEB1	SYNDIG1	chr20-24420319-24421236
ZEB1	SYNDIG1	chr20-24424811-24425694
ZEB1	SYNDIG1	chr20-24430117-24431047
HES6	SYNDIG1	chr20-24439566-24440618
ZNF367	SYNDIG1	chr20-24439566-24440618
ZEB1	SYNDIG1	chr20-24439566-24440618
ZNF367	SYNDIG1	chr20-24441408-24442355
ZNF367	SYNDIG1	chr20-24445186-24446981
ZEB1	SYNDIG1	chr20-24445186-24446981
LEF1	SYNDIG1	chr20-24450362-24451253
HES6	SYNDIG1	chr20-24452551-24453359
ZEB1	SYNDIG1	chr20-24452551-24453359
ZEB1	SYNDIG1	chr20-24455453-24456570
LEF1	SYNDIG1	chr20-24459634-24460444
ZEB1	SYNDIG1	chr20-24459634-24460444
ZEB1	SYNDIG1	chr20-24462081-24462952
ZEB1	SYNDIG1	chr20-24464868-24466393
ZEB1	SYNDIG1	chr20-24468505-24469198
ZEB1	SYNDIG1	chr20-24479294-24480338
LEF1	SYNDIG1	chr20-24483291-24484282
ZEB1	SYNDIG1	chr20-24483291-24484282
LEF1	SYNDIG1	chr20-24490694-24491684
ZEB1	SYNDIG1	chr20-24492005-24492944
E2F7	SYNDIG1	chr20-24523543-24524350
ZEB1	SYNDIG1	chr20-24531435-24532387
ZEB1	SYNDIG1	chr20-24542228-24543019
ZEB1	SYNDIG1	chr20-24587098-24588041
ZNF367	SYNDIG1	chr20-24588672-24591177
ZEB1	SYNDIG1	chr20-24588672-24591177
ZEB1	SYNDIG1	chr20-24616358-24617260
HES6	SYNDIG1	chr20-24633083-24633882
ZEB1	SYNDIG1	chr20-24638765-24639798
ZEB1	SYNDIG1	chr20-24647367-24648336
ZEB1	SYNDIG1	chr20-24653159-24653877
NR4A1	VSX1	chr20-24991846-24992593
EGR1	VSX1	chr20-24992980-24996718
EGR1	VSX1	chr20-25032012-25032368
EGR1	VSX1	chr20-25036728-25039344
NR4A1	VSX1	chr20-25036728-25039344
EGR1	VSX1	chr20-25042552-25043727
EGR1	VSX1	chr20-25048309-25051623
EGR1	VSX1	chr20-25056592-25057768
EGR1	VSX1	chr20-25064312-25066607
NR4A1	VSX1	chr20-25064312-25066607
EGR1	VSX1	chr20-25078000-25078341
PROX1	VSX1	chr20-25082366-25085698
EGR1	VSX1	chr20-25082366-25085698
EGR1	VSX1	chr20-25114928-25117672
EGR1	VSX1	chr20-25118033-25118959
EGR1	VSX1	chr20-25135924-25136936
NR4A1	VSX1	chr20-25138712-25139745
EGR1	VSX1	chr20-25146371-25147448
FOXM1	GINS1	chr20-25310473-25310806
FOXM1	GINS1	chr20-25314971-25315780
SOX11	GINS1	chr20-25317489-25320198
ZEB1	GINS1	chr20-25317489-25320198
ZEB1	GINS1	chr20-25328827-25329651
SOX11	GINS1	chr20-25336315-25337334
E2F8	GINS1	chr20-25336315-25337334
PROX1	GINS1	chr20-25350501-25351582
SOX11	GINS1	chr20-25350501-25351582
TP73	GINS1	chr20-25353423-25354263
SOX11	GINS1	chr20-25353423-25354263
ZEB1	GINS1	chr20-25353423-25354263
SOX11	GINS1	chr20-25354717-25357168
ZNF367	GINS1	chr20-25354717-25357168
ZEB1	GINS1	chr20-25354717-25357168
E2F8	GINS1	chr20-25354717-25357168
FOXM1	GINS1	chr20-25354717-25357168
E2F7	GINS1	chr20-25354717-25357168
ZNF695	GINS1	chr20-25376445-25377389
HES6	GINS1	chr20-25389329-25389925
ZEB1	GINS1	chr20-25390135-25390512
SOX11	GINS1	chr20-25390984-25391977
ZNF367	GINS1	chr20-25390984-25391977
FOXM1	GINS1	chr20-25390984-25391977
SOX11	GINS1	chr20-25398839-25401275
ZNF367	GINS1	chr20-25398839-25401275
ZNF695	GINS1	chr20-25407072-25407726
EGR1	ID1	chr20-31513481-31514427
FOXM1	ID1	chr20-31513481-31514427
FOSB	ID1	chr20-31513481-31514427
ID3	ID1	chr20-31543874-31544811
ID3	ID1	chr20-31553140-31554587
FOXM1	ID1	chr20-31553140-31554587
ID3	ID1	chr20-31556887-31558071
NR4A1	ID1	chr20-31562672-31563563
EGR1	ID1	chr20-31572020-31574620
FOS	ID1	chr20-31572020-31574620
FOSB	ID1	chr20-31572020-31574620
EGR1	ID1	chr20-31578126-31579034
ID3	ID1	chr20-31586930-31589094
EGR1	ID1	chr20-31586930-31589094
FOS	ID1	chr20-31586930-31589094
FOSB	ID1	chr20-31586930-31589094
ID3	ID1	chr20-31594614-31596838
EGR1	ID1	chr20-31594614-31596838
EGR1	ID1	chr20-31602517-31605282
E2F8	ID1	chr20-31602517-31605282
FOXM1	ID1	chr20-31602517-31605282
FOS	ID1	chr20-31602517-31605282
FOSB	ID1	chr20-31602517-31605282
SOX11	TPX2	chr20-31647963-31648969
SOX11	TPX2	chr20-31661101-31662617
TFAP2D	TPX2	chr20-31661101-31662617
MYBL1	TPX2	chr20-31661101-31662617
ZNF367	TPX2	chr20-31661101-31662617
SOX11	TPX2	chr20-31663958-31664451
TFAP2D	TPX2	chr20-31663958-31664451
FOXM1	TPX2	chr20-31663958-31664451
TFAP2D	TPX2	chr20-31666180-31667255
SOX11	TPX2	chr20-31684130-31685463
TFAP2D	TPX2	chr20-31684130-31685463
ZNF695	TPX2	chr20-31687473-31688355
HES6	TPX2	chr20-31687473-31688355
ZNF695	TPX2	chr20-31688859-31689769
SOX11	TPX2	chr20-31688859-31689769
TFAP2D	TPX2	chr20-31688859-31689769
SOX11	TPX2	chr20-31693441-31695036
GLI2	TPX2	chr20-31693441-31695036
HES6	TPX2	chr20-31693441-31695036
FOXM1	TPX2	chr20-31693441-31695036
FOXM1	TPX2	chr20-31708045-31709424
ZNF695	TPX2	chr20-31709971-31711355
SOX11	TPX2	chr20-31709971-31711355
TFAP2D	TPX2	chr20-31709971-31711355
ZNF367	TPX2	chr20-31709971-31711355
FOXM1	TPX2	chr20-31709971-31711355
ZNF695	TPX2	chr20-31711924-31713374
SOX11	TPX2	chr20-31711924-31713374
FOXM1	TPX2	chr20-31711924-31713374
TFAP2D	TPX2	chr20-31716594-31717494
ZNF695	TPX2	chr20-31718979-31721654
SOX11	TPX2	chr20-31718979-31721654
TFAP2D	TPX2	chr20-31718979-31721654
E2F8	TPX2	chr20-31718979-31721654
FOXM1	TPX2	chr20-31718979-31721654
ZNF367	TPX2	chr20-31723099-31723734
SOX11	TPX2	chr20-31738193-31739270
ZNF367	TPX2	chr20-31738193-31739270
BCL11B	TTLL9	chr20-31834690-31837511
DMRT3	XKR7	chr20-31962394-31964644
MSX1	CCM2L	chr20-31911142-31912208
SOX11	DNMT3B	chr20-32663375-32665799
SOX11	DNMT3B	chr20-32666919-32667850
SOX11	DNMT3B	chr20-32675521-32676466
SOX11	DNMT3B	chr20-32706761-32707048
SOX11	DNMT3B	chr20-32709378-32710335
SOX11	DNMT3B	chr20-32724792-32725542
SOX11	DNMT3B	chr20-32744849-32745560
SOX11	DNMT3B	chr20-32749747-32751373
SOX11	DNMT3B	chr20-32760248-32761019
SOX11	DNMT3B	chr20-32761559-32762384
SOX11	DNMT3B	chr20-32774735-32779851
SOX11	DNMT3B	chr20-32792068-32792625
HES6	CBFA2T2	chr20-33400694-33401427
E2F7	CBFA2T2	chr20-33400694-33401427
ONECUT2	CBFA2T2	chr20-33401562-33402311
GLI2	CBFA2T2	chr20-33410992-33411852
ZEB1	CBFA2T2	chr20-33415676-33416626
HES6	CBFA2T2	chr20-33433384-33434309
GLI2	CBFA2T2	chr20-33437244-33438097
LHX4	CBFA2T2	chr20-33442432-33443310
GLI2	CBFA2T2	chr20-33442432-33443310
ZNF367	CBFA2T2	chr20-33442432-33443310
TBX3	CBFA2T2	chr20-33443893-33445229
ZNF367	CBFA2T2	chr20-33454594-33455562
ZEB1	CBFA2T2	chr20-33454594-33455562
TBX3	CBFA2T2	chr20-33454594-33455562
HES6	CBFA2T2	chr20-33456940-33457854
E2F7	CBFA2T2	chr20-33456940-33457854
GLI2	CBFA2T2	chr20-33460018-33460950
LHX4	CBFA2T2	chr20-33462820-33463692
GLI2	CBFA2T2	chr20-33462820-33463692
ZEB1	CBFA2T2	chr20-33465023-33466355
ATOH7	CBFA2T2	chr20-33465023-33466355
TBX3	CBFA2T2	chr20-33465023-33466355
ZEB1	CBFA2T2	chr20-33472761-33473669
TBX3	CBFA2T2	chr20-33472761-33473669
ONECUT2	CBFA2T2	chr20-33472761-33473669
LHX4	CBFA2T2	chr20-33474390-33476509
ST18	CBFA2T2	chr20-33474390-33476509
MYBL1	CBFA2T2	chr20-33474390-33476509
ZNF367	CBFA2T2	chr20-33474390-33476509
ZEB1	CBFA2T2	chr20-33474390-33476509
TBX3	CBFA2T2	chr20-33474390-33476509
TBX3	CBFA2T2	chr20-33482320-33483253
ZEB1	CBFA2T2	chr20-33488768-33490074
ONECUT2	CBFA2T2	chr20-33488768-33490074
LHX4	CBFA2T2	chr20-33501389-33502304
HES6	CBFA2T2	chr20-33517837-33518705
GLI2	CBFA2T2	chr20-33531670-33531731
ST18	CBFA2T2	chr20-33532922-33533782
ATOH7	CBFA2T2	chr20-33532922-33533782
ONECUT2	CBFA2T2	chr20-33561889-33562333
LHX4	CBFA2T2	chr20-33563957-33564824
ZEB1	CBFA2T2	chr20-33563957-33564824
LHX4	CBFA2T2	chr20-33568154-33569158
ZEB1	CBFA2T2	chr20-33568154-33569158
ONECUT2	CBFA2T2	chr20-33568154-33569158
PBX4	CBFA2T2	chr20-33568154-33569158
ZNF367	CBFA2T2	chr20-33569746-33570553
ZEB1	CBFA2T2	chr20-33569746-33570553
ZEB1	CBFA2T2	chr20-33580320-33581122
ZEB1	CBFA2T2	chr20-33581238-33582178
TBX3	CBFA2T2	chr20-33581238-33582178
ZEB1	CBFA2T2	chr20-33598329-33599174
LHX4	CBFA2T2	chr20-33635148-33636091
ATOH7	CBFA2T2	chr20-33639911-33640340
ZNF367	E2F1	chr20-33576276-33577118
ZEB1	E2F1	chr20-33580320-33581122
SOX11	E2F1	chr20-33581238-33582178
ZEB1	E2F1	chr20-33581238-33582178
ID3	E2F1	chr20-33598329-33599174
ZEB1	E2F1	chr20-33598329-33599174
SOX11	E2F1	chr20-33604392-33605364
SOX11	E2F1	chr20-33635148-33636091
ZEB1	E2F1	chr20-33659733-33659884
ZNF367	E2F1	chr20-33665868-33666497
ID3	E2F1	chr20-33668526-33669142
SOX11	E2F1	chr20-33668526-33669142
HES6	E2F1	chr20-33668526-33669142
SOX11	E2F1	chr20-33672423-33674223
ZEB1	E2F1	chr20-33672423-33674223
ZNF695	E2F1	chr20-33674464-33675682
ZNF695	E2F1	chr20-33684167-33686003
SOX11	E2F1	chr20-33684167-33686003
ZEB1	E2F1	chr20-33684167-33686003
ID3	E2F1	chr20-33686405-33687901
E2F8	E2F1	chr20-33686405-33687901
E2F7	E2F1	chr20-33686405-33687901
SOX11	E2F1	chr20-33689615-33690543
ID3	E2F1	chr20-33692833-33695243
SOX11	E2F1	chr20-33692833-33695243
ZEB1	E2F1	chr20-33692833-33695243
E2F8	E2F1	chr20-33692833-33695243
ZNF695	E2F1	chr20-33709522-33710554
SOX11	E2F1	chr20-33719468-33720094
ZNF367	E2F1	chr20-33720320-33721058
ZEB1	E2F1	chr20-33720320-33721058
ZNF367	E2F1	chr20-33732053-33734340
ZEB1	E2F1	chr20-33783865-33784695
E2F7	E2F1	chr20-33783865-33784695
PTF1A	AL109923.1	chr20-34311803-34313336
PTF1A	AL109923.1	chr20-34318467-34319415
PTF1A	AL109923.1	chr20-34334515-34335447
PTF1A	AL109923.1	chr20-34363350-34364194
PTF1A	AL109923.1	chr20-34472979-34473916
SOX11	TGIF2	chr20-36521477-36522432
SOX11	TGIF2	chr20-36524771-36525552
SOX11	TGIF2	chr20-36526078-36526812
SOX11	TGIF2	chr20-36541562-36543471
SOX11	TGIF2	chr20-36571307-36573487
ZEB1	DSN1	chr20-36653702-36654321
ID3	DSN1	chr20-36674421-36675326
HES6	DSN1	chr20-36674421-36675326
TFAP2D	DSN1	chr20-36674421-36675326
ID3	DSN1	chr20-36676579-36677687
ZNF367	DSN1	chr20-36676579-36677687
ZNF367	DSN1	chr20-36700136-36700434
LEF1	DSN1	chr20-36700676-36700998
ID3	DSN1	chr20-36711939-36713011
PROX1	DSN1	chr20-36711939-36713011
ZNF367	DSN1	chr20-36711939-36713011
ZEB1	DSN1	chr20-36711939-36713011
ZNF695	DSN1	chr20-36717468-36718315
LEF1	DSN1	chr20-36719171-36720132
ZEB1	DSN1	chr20-36719171-36720132
ZNF695	DSN1	chr20-36722055-36723027
HES6	DSN1	chr20-36722055-36723027
ZNF367	DSN1	chr20-36722055-36723027
TFAP2D	DSN1	chr20-36744503-36746044
E2F8	DSN1	chr20-36744503-36746044
ID3	DSN1	chr20-36746079-36746776
ZNF695	DSN1	chr20-36746079-36746776
ZNF367	DSN1	chr20-36746079-36746776
ZNF367	DSN1	chr20-36754339-36754762
TFAP2D	DSN1	chr20-36772992-36773393
MYBL2	DSN1	chr20-36772992-36773393
ID3	DSN1	chr20-36773819-36774998
ID3	DSN1	chr20-36792073-36793111
PROX1	DSN1	chr20-36792073-36793111
ZEB1	DSN1	chr20-36792073-36793111
ZEB1	DSN1	chr20-36807032-36807857
E2F7	DSN1	chr20-36807032-36807857
ID3	DSN1	chr20-36808744-36809332
ZNF695	DSN1	chr20-36819428-36820355
ID3	DSN1	chr20-36821705-36822740
ZNF367	DSN1	chr20-36821705-36822740
ZEB1	DSN1	chr20-36821705-36822740
E2F7	DSN1	chr20-36821705-36822740
ZNF695	DSN1	chr20-36823844-36826860
HES6	DSN1	chr20-36823844-36826860
ZNF367	DSN1	chr20-36823844-36826860
TFAP2D	DSN1	chr20-36827787-36828367
TFAP2D	DSN1	chr20-36830858-36831571
ID3	DSN1	chr20-36832061-36837317
ZNF695	DSN1	chr20-36832061-36837317
LEF1	DSN1	chr20-36832061-36837317
TFAP2D	DSN1	chr20-36832061-36837317
ZEB1	DSN1	chr20-36832061-36837317
TFAP2D	DSN1	chr20-36841515-36842439
ID3	DSN1	chr20-36844787-36848623
TFAP2D	DSN1	chr20-36844787-36848623
ZEB1	DSN1	chr20-36844787-36848623
E2F7	DSN1	chr20-36844787-36848623
SNAI1	DSN1	chr20-36844787-36848623
ZNF695	DSN1	chr20-36851819-36852810
HES6	DSN1	chr20-36851819-36852810
TFAP2D	DSN1	chr20-36851819-36852810
TFAP2D	DSN1	chr20-36853224-36855152
HES6	DSN1	chr20-36860894-36862657
TFAP2D	DSN1	chr20-36860894-36862657
ZNF367	DSN1	chr20-36860894-36862657
ID3	DSN1	chr20-36863687-36865971
ZEB1	DSN1	chr20-36863687-36865971
ID3	DSN1	chr20-36872564-36873485
ZNF367	DSN1	chr20-36872564-36873485
ZEB1	DSN1	chr20-36872564-36873485
ZNF600	SAMHD1	chr20-36808324-36808512
ZNF600	SAMHD1	chr20-36821705-36822740
ZNF600	SAMHD1	chr20-36830858-36831571
ZNF600	SAMHD1	chr20-36832061-36837317
ZNF600	SAMHD1	chr20-36844787-36848623
ZNF600	SAMHD1	chr20-36851819-36852810
ZNF600	SAMHD1	chr20-36853224-36855152
ZNF600	SAMHD1	chr20-36863687-36865971
ZNF600	SAMHD1	chr20-36877259-36877898
ZNF600	SAMHD1	chr20-36886781-36887454
ZNF600	SAMHD1	chr20-36929303-36930265
ZNF600	SAMHD1	chr20-36950751-36951435
HMGA2	RBL1	chr20-36918191-36918989
HES6	RBL1	chr20-36919545-36920500
FOXM1	RBL1	chr20-36919545-36920500
HMGA2	RBL1	chr20-36919545-36920500
LEF1	RBL1	chr20-36929303-36930265
HMGA2	RBL1	chr20-36929303-36930265
ZNF695	RBL1	chr20-36951844-36952483
ZNF695	RBL1	chr20-37094952-37095772
ZEB1	RBL1	chr20-37094952-37095772
E2F8	RBL1	chr20-37094952-37095772
HMGA2	RBL1	chr20-37094952-37095772
E2F7	RBL1	chr20-37094952-37095772
MYBL2	RBL1	chr20-37094952-37095772
E2F2	RBL1	chr20-37095996-37096791
HES6	RBL1	chr20-37095996-37096791
HMGA2	RBL1	chr20-37177900-37178409
E2F2	RBL1	chr20-37178515-37178798
FOXM1	RBL1	chr20-37191965-37193297
HMGA2	RBL1	chr20-37191965-37193297
E2F8	RBL1	chr20-37194692-37196333
FOXM1	RBL1	chr20-37194692-37196333
HMGA2	RBL1	chr20-37194692-37196333
E2F7	RBL1	chr20-37194692-37196333
ZEB1	NNAT	chr20-37419554-37424058
ZEB1	NNAT	chr20-37425752-37426735
ZEB1	NNAT	chr20-37430828-37431785
ZEB1	NNAT	chr20-37436594-37437217
ZEB1	NNAT	chr20-37438324-37438654
ZEB1	NNAT	chr20-37439307-37440147
ZEB1	NNAT	chr20-37448882-37449932
ZEB1	NNAT	chr20-37463756-37464777
ZEB1	NNAT	chr20-37468828-37470170
ZEB1	NNAT	chr20-37473182-37473377
ZEB1	NNAT	chr20-37474458-37475876
ZFHX3	NNAT	chr20-37476606-37477528
ZEB1	NNAT	chr20-37504571-37504899
ZEB1	NNAT	chr20-37509566-37510385
ZFHX3	NNAT	chr20-37513438-37514349
IRF1	VSTM2L	chr20-37803049-37805652
ONECUT2	VSTM2L	chr20-37820819-37821642
BARHL2	VSTM2L	chr20-37840341-37841197
IRF1	VSTM2L	chr20-37862984-37865496
IRF1	VSTM2L	chr20-37877842-37879468
IRF1	VSTM2L	chr20-37880251-37883695
ONECUT2	VSTM2L	chr20-37894025-37899341
ONECUT3	VSTM2L	chr20-37894025-37899341
IRF1	VSTM2L	chr20-37903472-37909920
ONECUT2	VSTM2L	chr20-37903472-37909920
ONECUT3	VSTM2L	chr20-37903472-37909920
BARHL2	VSTM2L	chr20-37911254-37916808
IRF1	VSTM2L	chr20-37911254-37916808
LEF1	KIAA1755	chr20-38125082-38125897
HMGA2	KIAA1755	chr20-38125082-38125897
HES6	KIAA1755	chr20-38130370-38131092
ZEB1	KIAA1755	chr20-38130370-38131092
HMGA2	KIAA1755	chr20-38130370-38131092
HMGA2	KIAA1755	chr20-38139860-38140669
LHX4	KIAA1755	chr20-38142822-38144637
HMGA2	KIAA1755	chr20-38146895-38147960
LHX4	KIAA1755	chr20-38152017-38153406
HMGA2	KIAA1755	chr20-38152017-38153406
LHX4	KIAA1755	chr20-38158740-38159375
HES6	KIAA1755	chr20-38164713-38165188
MYBL1	KIAA1755	chr20-38164713-38165188
ZEB1	KIAA1755	chr20-38165373-38165917
ZEB1	KIAA1755	chr20-38173202-38174259
ZEB1	KIAA1755	chr20-38175056-38176077
HMGA2	KIAA1755	chr20-38175056-38176077
HMGA2	KIAA1755	chr20-38187261-38188224
LHX4	KIAA1755	chr20-38196362-38198283
HMGA2	KIAA1755	chr20-38196362-38198283
ZEB1	KIAA1755	chr20-38199517-38200447
HMGA2	KIAA1755	chr20-38199517-38200447
ZEB1	KIAA1755	chr20-38213744-38213988
ZEB1	KIAA1755	chr20-38217095-38217252
LHX4	KIAA1755	chr20-38226382-38227153
ZEB1	KIAA1755	chr20-38226382-38227153
ZEB1	KIAA1755	chr20-38229456-38230417
HMGA2	KIAA1755	chr20-38229456-38230417
LEF1	KIAA1755	chr20-38238633-38239465
HMGA2	KIAA1755	chr20-38252442-38253474
ATOH7	KIAA1755	chr20-38258733-38260148
HMGA2	KIAA1755	chr20-38260773-38261262
LHX4	KIAA1755	chr20-38262695-38263709
ZEB1	KIAA1755	chr20-38267638-38268580
HES6	KIAA1755	chr20-38277733-38279020
ZEB1	KIAA1755	chr20-38277733-38279020
HMGA2	KIAA1755	chr20-38277733-38279020
HMGA2	KIAA1755	chr20-38279867-38280700
HES6	KIAA1755	chr20-38286471-38287684
ZEB1	KIAA1755	chr20-38286471-38287684
HMGA2	KIAA1755	chr20-38286471-38287684
HMGA2	KIAA1755	chr20-38290907-38291348
ZEB1	KIAA1755	chr20-38299782-38300629
HMGA2	KIAA1755	chr20-38302461-38303371
HMGA2	KIAA1755	chr20-38307258-38307566
ATOH7	KIAA1755	chr20-38307682-38307973
HMGA2	KIAA1755	chr20-38314893-38315951
HMGA2	KIAA1755	chr20-38321809-38322658
ONECUT2	KIAA1755	chr20-38328859-38329824
ZEB1	KIAA1755	chr20-38337506-38338387
TSHZ3	BPI	chr20-38173202-38174259
TSHZ3	BPI	chr20-38217095-38217252
TSHZ3	BPI	chr20-38260773-38261262
TSHZ3	BPI	chr20-38277733-38279020
TSHZ3	BPI	chr20-38298584-38299586
TSHZ3	BPI	chr20-38302461-38303371
TSHZ3	BPI	chr20-38307258-38307566
PRDM13	PPP1R16B	chr20-38706157-38707362
PTF1A	PPP1R16B	chr20-38706157-38707362
PRDM13	PPP1R16B	chr20-38714351-38716234
PRDM13	PPP1R16B	chr20-38717554-38718708
PRDM13	PPP1R16B	chr20-38719305-38721066
PRDM13	PPP1R16B	chr20-38721965-38724461
PTF1A	PPP1R16B	chr20-38721965-38724461
TBX3	PPP1R16B	chr20-38729373-38729747
E2F2	PPP1R16B	chr20-38730255-38732101
PRDM13	PPP1R16B	chr20-38730255-38732101
PRDM13	PPP1R16B	chr20-38747440-38748441
PTF1A	PPP1R16B	chr20-38770480-38771558
PRDM13	PPP1R16B	chr20-38804095-38805704
PTF1A	PPP1R16B	chr20-38804095-38805704
E2F2	PPP1R16B	chr20-38805793-38807994
PTF1A	PPP1R16B	chr20-38811665-38812510
PRDM13	PPP1R16B	chr20-38812719-38813637
TBX3	PPP1R16B	chr20-38812719-38813637
PRDM13	PPP1R16B	chr20-38825740-38826711
ST18	PPP1R16B	chr20-38825740-38826711
PTF1A	PPP1R16B	chr20-38826955-38827806
PRDM13	PPP1R16B	chr20-38829324-38830371
PRDM13	PPP1R16B	chr20-38864455-38865456
PRDM13	PPP1R16B	chr20-38882959-38884025
PTF1A	PPP1R16B	chr20-38882959-38884025
PRDM13	PPP1R16B	chr20-38892951-38894803
PTF1A	PPP1R16B	chr20-38892951-38894803
TBX3	PPP1R16B	chr20-38892951-38894803
ZNF695	FAM83D	chr20-38825740-38826711
ZNF367	FAM83D	chr20-38826955-38827806
E2F7	FAM83D	chr20-38829324-38830371
FOXM1	FAM83D	chr20-38882959-38884025
ZNF695	FAM83D	chr20-38917866-38918156
ZNF695	FAM83D	chr20-38925618-38926311
ZNF114	MAFB	chr20-40689241-40693225
ZEB1	PTPRT	chr20-42040787-42041862
ZEB1	PTPRT	chr20-42061801-42062865
ZEB1	PTPRT	chr20-42088849-42089978
POU2F2	PTPRT	chr20-42093354-42094292
ZEB1	PTPRT	chr20-42095144-42096126
ZEB1	PTPRT	chr20-42112766-42113847
POU2F2	PTPRT	chr20-42129205-42130092
POU2F2	PTPRT	chr20-42402295-42403201
ZEB1	PTPRT	chr20-42406485-42407436
POU2F2	PTPRT	chr20-42406485-42407436
ZEB1	PTPRT	chr20-42441418-42443106
POU2F2	PTPRT	chr20-42441418-42443106
POU2F2	PTPRT	chr20-42476797-42477708
ZEB1	PTPRT	chr20-42530506-42531396
POU2F2	PTPRT	chr20-42767667-42768632
POU2F2	PTPRT	chr20-42794825-42795995
ZEB1	PTPRT	chr20-42797226-42798198
ZEB1	PTPRT	chr20-42854276-42855216
ZEB1	PTPRT	chr20-42857152-42858091
ZEB1	PTPRT	chr20-42927734-42928662
ZEB1	PTPRT	chr20-42945003-42945946
POU2F2	PTPRT	chr20-42968470-42969500
ZEB1	PTPRT	chr20-42979541-42980441
POU2F2	PTPRT	chr20-43009336-43010265
POU2F2	PTPRT	chr20-43058212-43059171
ZEB1	PTPRT	chr20-43187537-43188483
POU2F2	PTPRT	chr20-43187537-43188483
ZEB1	PTPRT	chr20-43191693-43192566
ZEB1	PTPRT	chr20-43238582-43239519
ZEB1	PTPRT	chr20-43258147-43259390
ZNF367	MYBL2	chr20-43583629-43584596
E2F2	MYBL2	chr20-43591055-43591707
ZNF695	MYBL2	chr20-43656935-43658402
ZNF695	MYBL2	chr20-43666204-43667018
TSHZ3	MYBL2	chr20-43666204-43667018
E2F8	MYBL2	chr20-43667304-43668142
E2F7	MYBL2	chr20-43667304-43668142
GLI2	TOX2	chr20-43831196-43832104
GLI2	TOX2	chr20-43835795-43836931
ZEB1	TOX2	chr20-43835795-43836931
ZEB1	TOX2	chr20-43842174-43843360
ZEB1	TOX2	chr20-43844367-43845339
ZEB1	TOX2	chr20-43846837-43847701
GLI2	TOX2	chr20-43868102-43869670
ZEB1	TOX2	chr20-43868102-43869670
ZEB1	TOX2	chr20-43899185-43900122
GLI2	TOX2	chr20-43902874-43905272
GLI2	TOX2	chr20-43913896-43914863
GLI2	TOX2	chr20-43923721-43927300
ZEB1	TOX2	chr20-43923721-43927300
GLI2	TOX2	chr20-43927938-43929048
ZEB1	TOX2	chr20-43940104-43941061
GLI2	TOX2	chr20-43946733-43949096
ZEB1	TOX2	chr20-43946733-43949096
ZEB1	TOX2	chr20-43949887-43950751
GLI2	TOX2	chr20-43958816-43960412
GLI2	TOX2	chr20-43961307-43963393
ZEB1	TOX2	chr20-43961307-43963393
ZEB1	TOX2	chr20-43987284-43988298
GLI2	TOX2	chr20-44011207-44012201
ZEB1	TOX2	chr20-44019934-44020989
ZEB1	TOX2	chr20-44030938-44033747
ZEB1	TOX2	chr20-44039230-44039573
EBF3	GDAP1L1	chr20-44166384-44167255
SOX11	GDAP1L1	chr20-44204628-44205139
ZFHX3	GDAP1L1	chr20-44214736-44214887
SOX11	GDAP1L1	chr20-44217069-44217366
SOX11	GDAP1L1	chr20-44247515-44248733
SOX11	GDAP1L1	chr20-44258766-44259664
EBF3	GDAP1L1	chr20-44258766-44259664
SOX11	GDAP1L1	chr20-44260780-44261694
LHX9	LINC01620	chr20-44548392-44549388
POU2F2	WFDC8	chr20-45579327-45579796
ONECUT2	WFDC8	chr20-45629261-45629525
SOX11	UBE2C	chr20-45770935-45771997
FOXM1	UBE2C	chr20-45770935-45771997
SOX11	UBE2C	chr20-45779499-45779844
ZNF695	UBE2C	chr20-45790956-45791831
ZNF367	UBE2C	chr20-45790956-45791831
TFAP2D	UBE2C	chr20-45792110-45792535
TFAP2D	UBE2C	chr20-45811615-45812575
TFAP2B	CDH22	chr20-46088753-46089816
TFAP2B	CDH22	chr20-46091543-46092524
FOXM1	CDH22	chr20-46091543-46092524
FOXM1	CDH22	chr20-46099249-46100217
TFAP2B	CDH22	chr20-46111027-46111937
TFAP2B	CDH22	chr20-46118395-46118782
FOXM1	CDH22	chr20-46127290-46127978
TFAP2B	CDH22	chr20-46128359-46128881
TFAP2B	CDH22	chr20-46132201-46133360
TFAP2B	CDH22	chr20-46135741-46136718
TFAP2B	CDH22	chr20-46138655-46140619
TFAP2B	CDH22	chr20-46152920-46155113
FOXM1	CDH22	chr20-46152920-46155113
TFAP2B	CDH22	chr20-46157302-46159324
FOXM1	CDH22	chr20-46163675-46164835
FOXM1	CDH22	chr20-46176398-46177395
TFAP2B	CDH22	chr20-46178717-46180527
TFAP2B	CDH22	chr20-46192292-46193250
TFAP2B	CDH22	chr20-46198930-46199422
FOXM1	CDH22	chr20-46200308-46201622
TFAP2B	CDH22	chr20-46202784-46203828
FOXM1	CDH22	chr20-46210561-46212346
TFAP2B	CDH22	chr20-46214374-46216825
FOXM1	CDH22	chr20-46214374-46216825
TFAP2B	CDH22	chr20-46227628-46229080
FOXM1	CDH22	chr20-46227628-46229080
TFAP2B	CDH22	chr20-46230648-46231566
FOXM1	CDH22	chr20-46246161-46247213
TFAP2B	CDH22	chr20-46253102-46254052
TFAP2B	CDH22	chr20-46255255-46256236
TFAP2B	CDH22	chr20-46267633-46269058
TFAP2B	CDH22	chr20-46269682-46271498
TFAP2B	CDH22	chr20-46282393-46283363
TFAP2B	CDH22	chr20-46295995-46297217
FOXM1	CDH22	chr20-46295995-46297217
TFAP2B	CDH22	chr20-46306811-46308254
TFAP2B	CDH22	chr20-46311254-46313137
TFAP2B	CDH22	chr20-46330172-46330393
TFAP2B	CDH22	chr20-46332148-46333428
TFAP2B	CDH22	chr20-46337309-46338330
TFAP2B	CDH22	chr20-46341119-46342393
TFAP2B	CDH22	chr20-46350891-46352050
TFAP2B	CDH22	chr20-46353198-46354332
FOXM1	CDH22	chr20-46353198-46354332
TFAP2B	CDH22	chr20-46363586-46364039
FOXM1	CDH22	chr20-46364459-46365382
FOXM1	CDH22	chr20-46400069-46400969
TFAP2B	CDH22	chr20-46401294-46403112
TFAP2B	CDH22	chr20-46405400-46406547
ID3	SLC13A3	chr20-46477200-46478124
ID3	SLC13A3	chr20-46520624-46521654
GLI2	SLC13A3	chr20-46562049-46563413
GLI2	SLC13A3	chr20-46571819-46572810
SNAI1	SLC13A3	chr20-46650901-46651310
GLI2	SLC13A3	chr20-46688382-46689126
GLI2	SLC13A3	chr20-46696668-46697530
GLI2	SLC13A3	chr20-46698019-46699085
GLI2	SLC13A3	chr20-46708913-46709486
GLI2	SLC13A3	chr20-46717646-46718524
ID3	SLC13A3	chr20-46766950-46767809
GLI2	SLC13A3	chr20-46766950-46767809
ID3	SLC13A3	chr20-46777738-46778757
ZEB1	EYA2	chr20-46796959-46797884
HMGA2	EYA2	chr20-46796959-46797884
HES6	EYA2	chr20-46799577-46800654
ZEB1	EYA2	chr20-46799577-46800654
HMGA2	EYA2	chr20-46799577-46800654
ZEB1	EYA2	chr20-46801861-46804764
HMGA2	EYA2	chr20-46801861-46804764
ZEB1	EYA2	chr20-46810238-46812085
HMGA2	EYA2	chr20-46810238-46812085
HMGA2	EYA2	chr20-46820454-46821502
HMGA2	EYA2	chr20-46849839-46850949
HMGA2	EYA2	chr20-46885571-46886477
HES6	EYA2	chr20-46897222-46898944
ZEB1	EYA2	chr20-46897222-46898944
HMGA2	EYA2	chr20-46897222-46898944
HMGA2	EYA2	chr20-46928453-46929257
HMGA2	EYA2	chr20-46938620-46939482
HES6	EYA2	chr20-46942675-46943538
HMGA2	EYA2	chr20-46942675-46943538
ZEB1	EYA2	chr20-46951907-46952801
HMGA2	EYA2	chr20-46954365-46955325
ZEB1	EYA2	chr20-46957002-46957954
HMGA2	EYA2	chr20-46960474-46961384
HMGA2	EYA2	chr20-46970931-46971923
HMGA2	EYA2	chr20-46973555-46974491
HMGA2	EYA2	chr20-46999706-47000692
HMGA2	EYA2	chr20-47007722-47008659
HMGA2	EYA2	chr20-47018761-47019735
ZEB1	EYA2	chr20-47031522-47032412
HMGA2	EYA2	chr20-47031522-47032412
HMGA2	EYA2	chr20-47034909-47035892
ZEB1	EYA2	chr20-47047569-47048493
HMGA2	EYA2	chr20-47047569-47048493
HES6	EYA2	chr20-47051863-47052790
ZEB1	EYA2	chr20-47051863-47052790
ZEB1	EYA2	chr20-47093053-47094142
HMGA2	EYA2	chr20-47108518-47109415
ZEB1	EYA2	chr20-47113241-47114251
HMGA2	EYA2	chr20-47113241-47114251
ZEB1	EYA2	chr20-47124901-47126749
HMGA2	EYA2	chr20-47124901-47126749
TBX3	EYA2	chr20-47124901-47126749
ZEB1	EYA2	chr20-47127394-47128466
HMGA2	EYA2	chr20-47127394-47128466
HES6	EYA2	chr20-47133701-47134647
HMGA2	EYA2	chr20-47135417-47136286
HES6	EYA2	chr20-47146662-47147120
HES6	EYA2	chr20-47150045-47151297
ZEB1	EYA2	chr20-47150045-47151297
HMGA2	EYA2	chr20-47150045-47151297
TBX3	EYA2	chr20-47150045-47151297
HMGA2	EYA2	chr20-47170566-47171497
HMGA2	EYA2	chr20-47183117-47183290
HES6	KCNB1	chr20-49274934-49275714
HES6	KCNB1	chr20-49278427-49279638
ZNF367	KCNB1	chr20-49278427-49279638
HES6	KCNB1	chr20-49289696-49290619
ZNF367	KCNB1	chr20-49312934-49314108
HES6	KCNB1	chr20-49323376-49324335
ZNF367	KCNB1	chr20-49346687-49348708
HES6	KCNB1	chr20-49383894-49386161
ZNF367	KCNB1	chr20-49383894-49386161
ZNF367	KCNB1	chr20-49394999-49395882
ZNF367	KCNB1	chr20-49427491-49428191
ZNF367	KCNB1	chr20-49432155-49434060
HES6	KCNB1	chr20-49449959-49451332
ZNF367	KCNB1	chr20-49475751-49476017
ZNF367	KCNB1	chr20-49494921-49495571
ZNF367	KCNB1	chr20-49501613-49502560
ZNF367	KCNB1	chr20-49516754-49517747
HES6	KCNB1	chr20-49533929-49534899
HES6	KCNB1	chr20-49540114-49540963
HES6	KCNB1	chr20-49541467-49542441
MAFB	B4GALT5	chr20-49685622-49686499
TBX3	SNAI1	chr20-49887005-49887828
TBX3	SNAI1	chr20-49936553-49938533
TBX3	SNAI1	chr20-49964713-49965549
NEUROG2	NFATC2	chr20-51318090-51319787
NEUROG2	NFATC2	chr20-51412427-51413573
FOS	NFATC2	chr20-51456356-51457475
NEUROG2	NFATC2	chr20-51467763-51468615
FOS	NFATC2	chr20-51562832-51563386
FOS	NFATC2	chr20-51563800-51564656
NR4A3	NFATC2	chr20-51639505-51639939
ZEB1	TSHZ2	chr20-52895442-52896411
MEF2C	TSHZ2	chr20-52898893-52899791
LHX4	TSHZ2	chr20-52903093-52904019
MEF2C	TSHZ2	chr20-52903093-52904019
LHX4	TSHZ2	chr20-52904695-52905729
SOX11	TSHZ2	chr20-52904695-52905729
ID3	TSHZ2	chr20-52918742-52920848
LHX4	TSHZ2	chr20-52918742-52920848
LEF1	TSHZ2	chr20-52918742-52920848
MEF2C	TSHZ2	chr20-52918742-52920848
SOX11	TSHZ2	chr20-52937364-52938369
SOX11	TSHZ2	chr20-52958822-52959765
SOX11	TSHZ2	chr20-52963762-52964733
GLI2	TSHZ2	chr20-52971767-52972406
EGR1	TSHZ2	chr20-52971767-52972406
SMAD9	TSHZ2	chr20-52971767-52972406
SOX11	TSHZ2	chr20-52991571-52992423
MEF2C	TSHZ2	chr20-53000954-53001157
EGR1	TSHZ2	chr20-53003081-53004296
HMGA2	TSHZ2	chr20-53003081-53004296
MEF2C	TSHZ2	chr20-53004984-53005932
LHX4	TSHZ2	chr20-53036838-53037620
HES6	TSHZ2	chr20-53036838-53037620
HMGA2	TSHZ2	chr20-53037623-53038496
LHX4	TSHZ2	chr20-53040588-53041344
SOX11	TSHZ2	chr20-53040588-53041344
HES6	TSHZ2	chr20-53040588-53041344
ZNF367	TSHZ2	chr20-53040588-53041344
LHX4	TSHZ2	chr20-53070646-53071570
SOX11	TSHZ2	chr20-53070646-53071570
MEF2C	TSHZ2	chr20-53070646-53071570
EGR1	TSHZ2	chr20-53070646-53071570
ZNF367	TSHZ2	chr20-53070646-53071570
LHX4	TSHZ2	chr20-53081696-53082793
SOX11	TSHZ2	chr20-53081696-53082793
GLI2	TSHZ2	chr20-53081696-53082793
MEF2C	TSHZ2	chr20-53081696-53082793
ID3	TSHZ2	chr20-53140942-53141839
GLI2	TSHZ2	chr20-53140942-53141839
ID3	TSHZ2	chr20-53142273-53143332
LHX4	TSHZ2	chr20-53142273-53143332
LEF1	TSHZ2	chr20-53162145-53162991
ID3	TSHZ2	chr20-53165230-53166159
SOX11	TSHZ2	chr20-53165230-53166159
SOX11	TSHZ2	chr20-53170850-53171719
LHX4	TSHZ2	chr20-53195688-53196599
PROX1	TSHZ2	chr20-53195688-53196599
ZEB1	TSHZ2	chr20-53195688-53196599
HMGA2	TSHZ2	chr20-53195688-53196599
PBX4	TSHZ2	chr20-53195688-53196599
SOX11	TSHZ2	chr20-53211777-53212619
MEF2C	TSHZ2	chr20-53216710-53217729
ZEB1	TSHZ2	chr20-53216710-53217729
HMGA2	TSHZ2	chr20-53216710-53217729
LHX4	TSHZ2	chr20-53225958-53226837
SOX11	TSHZ2	chr20-53227243-53228195
SOX11	TSHZ2	chr20-53261930-53262813
MEF2C	TSHZ2	chr20-53261930-53262813
MEF2C	TSHZ2	chr20-53270572-53271545
SOX11	TSHZ2	chr20-53274454-53275354
ID3	TSHZ2	chr20-53283982-53285251
LHX4	TSHZ2	chr20-53283982-53285251
SOX11	TSHZ2	chr20-53283982-53285251
E2F8	TSHZ2	chr20-53283982-53285251
HMGA2	TSHZ2	chr20-53283982-53285251
E2F7	TSHZ2	chr20-53283982-53285251
ZEB1	TSHZ2	chr20-53337064-53338127
HMGA2	TSHZ2	chr20-53337064-53338127
SOX11	TSHZ2	chr20-53345464-53346610
LEF1	TSHZ2	chr20-53345464-53346610
EGR1	TSHZ2	chr20-53345464-53346610
MYBL1	TSHZ2	chr20-53345464-53346610
SOX11	TSHZ2	chr20-53360591-53361575
LHX4	TSHZ2	chr20-53408393-53410355
PROX1	TSHZ2	chr20-53408393-53410355
SOX11	TSHZ2	chr20-53408393-53410355
MEF2C	TSHZ2	chr20-53408393-53410355
ZEB1	TSHZ2	chr20-53408393-53410355
HMGA2	TSHZ2	chr20-53408393-53410355
ONECUT2	TSHZ2	chr20-53408393-53410355
PBX4	TSHZ2	chr20-53408393-53410355
SOX11	TSHZ2	chr20-53412365-53413492
LEF1	TSHZ2	chr20-53412365-53413492
ID3	TSHZ2	chr20-53419412-53420414
PROX1	TSHZ2	chr20-53419412-53420414
LHX4	TSHZ2	chr20-53426730-53427680
SOX11	TSHZ2	chr20-53426730-53427680
GLI2	TSHZ2	chr20-53426730-53427680
LEF1	TSHZ2	chr20-53426730-53427680
MEF2C	TSHZ2	chr20-53426730-53427680
PBX4	TSHZ2	chr20-53426730-53427680
SOX11	TSHZ2	chr20-53444057-53445674
GLI2	TSHZ2	chr20-53444057-53445674
HES6	TSHZ2	chr20-53444057-53445674
E2F8	TSHZ2	chr20-53444057-53445674
SMAD7	TSHZ2	chr20-53444057-53445674
HMGA2	TSHZ2	chr20-53467776-53468756
MAFB	ZNF217	chr20-53578469-53579456
ZNF600	ZNF217	chr20-53592054-53593755
IRX2	ZNF217	chr20-53593840-53595282
IRX2	ZNF217	chr20-53613716-53614634
ZNF600	ZNF217	chr20-53623039-53624108
IRX2	ZNF217	chr20-53707295-53708103
LEF1	DOK5	chr20-54397251-54398281
ZEB1	DOK5	chr20-54397251-54398281
HMGA2	DOK5	chr20-54397251-54398281
HMGA2	DOK5	chr20-54431185-54432142
HMGA2	DOK5	chr20-54448497-54449296
LEF1	DOK5	chr20-54449939-54450850
ZNF367	DOK5	chr20-54449939-54450850
HMGA2	DOK5	chr20-54469099-54469987
GLI2	DOK5	chr20-54474538-54475596
ZNF367	DOK5	chr20-54474538-54475596
ZEB1	DOK5	chr20-54474538-54475596
PROX1	DOK5	chr20-54476013-54476946
HMGA2	DOK5	chr20-54476013-54476946
HMGA2	DOK5	chr20-54510317-54511266
HMGA2	DOK5	chr20-54513784-54514734
HMGA2	DOK5	chr20-54515706-54516514
HMGA2	DOK5	chr20-54573622-54574526
HES6	DOK5	chr20-54597954-54598867
MYBL1	DOK5	chr20-54597954-54598867
ZEB1	DOK5	chr20-54597954-54598867
ZNF367	DOK5	chr20-54614335-54615301
HMGA2	DOK5	chr20-54614335-54615301
GLI2	DOK5	chr20-54623991-54626806
ZNF367	DOK5	chr20-54623991-54626806
ZEB1	DOK5	chr20-54623991-54626806
HMGA2	DOK5	chr20-54623991-54626806
HMGA2	DOK5	chr20-54633522-54634708
PROX1	DOK5	chr20-54636270-54637247
HMGA2	DOK5	chr20-54636270-54637247
HES6	DOK5	chr20-54646547-54647538
ZNF367	DOK5	chr20-54646547-54647538
HMGA2	DOK5	chr20-54646547-54647538
ZEB1	DOK5	chr20-54649106-54650414
HMGA2	DOK5	chr20-54649106-54650414
ZEB1	LINC01440	chr20-55469022-55469743
ZEB1	PMEPA1	chr20-57560569-57561079
GLI2	PMEPA1	chr20-57570208-57571266
HMGA2	PMEPA1	chr20-57570208-57571266
SOX11	PMEPA1	chr20-57572907-57573910
ID3	PMEPA1	chr20-57582718-57583659
SOX11	PMEPA1	chr20-57582718-57583659
GLI2	PMEPA1	chr20-57582718-57583659
HES6	PMEPA1	chr20-57582718-57583659
HMGA2	PMEPA1	chr20-57582718-57583659
SOX11	PMEPA1	chr20-57586076-57586960
LHX4	PMEPA1	chr20-57593937-57594892
GLI2	PMEPA1	chr20-57596685-57598533
LEF1	PMEPA1	chr20-57596685-57598533
ZEB1	PMEPA1	chr20-57596685-57598533
HMGA2	PMEPA1	chr20-57596685-57598533
SMAD7	PMEPA1	chr20-57596685-57598533
LHX4	PMEPA1	chr20-57600302-57600576
GLI2	PMEPA1	chr20-57600302-57600576
SOX11	PMEPA1	chr20-57608835-57610148
GLI2	PMEPA1	chr20-57608835-57610148
ZEB1	PMEPA1	chr20-57608835-57610148
ZEB1	PMEPA1	chr20-57611419-57611726
HMGA2	PMEPA1	chr20-57611419-57611726
SOX11	PMEPA1	chr20-57622193-57623259
LEF1	PMEPA1	chr20-57622193-57623259
SMAD7	PMEPA1	chr20-57622193-57623259
SOX11	PMEPA1	chr20-57646730-57648302
GLI2	PMEPA1	chr20-57646730-57648302
HES6	PMEPA1	chr20-57646730-57648302
ZNF367	PMEPA1	chr20-57646730-57648302
ZEB1	PMEPA1	chr20-57646730-57648302
HMGA2	PMEPA1	chr20-57646730-57648302
SOX11	PMEPA1	chr20-57653087-57655632
GLI2	PMEPA1	chr20-57653087-57655632
ZEB1	PMEPA1	chr20-57653087-57655632
SMAD7	PMEPA1	chr20-57653087-57655632
ID3	PMEPA1	chr20-57656437-57659542
ZEB1	PMEPA1	chr20-57656437-57659542
SOX11	PMEPA1	chr20-57659698-57660332
ID3	PMEPA1	chr20-57660844-57665021
SOX11	PMEPA1	chr20-57660844-57665021
GLI2	PMEPA1	chr20-57660844-57665021
HES6	PMEPA1	chr20-57660844-57665021
ZNF367	PMEPA1	chr20-57660844-57665021
ZEB1	PMEPA1	chr20-57660844-57665021
HMGA2	PMEPA1	chr20-57660844-57665021
SMAD7	PMEPA1	chr20-57660844-57665021
GLI2	PMEPA1	chr20-57676474-57677388
SOX11	PMEPA1	chr20-57694720-57699468
LEF1	PMEPA1	chr20-57694720-57699468
ZNF367	PMEPA1	chr20-57694720-57699468
ZEB1	PMEPA1	chr20-57694720-57699468
SMAD7	PMEPA1	chr20-57694720-57699468
ID3	PMEPA1	chr20-57717678-57720320
HES6	PMEPA1	chr20-57717678-57720320
ZEB1	PMEPA1	chr20-57717678-57720320
HMGA2	PMEPA1	chr20-57717678-57720320
SMAD7	PMEPA1	chr20-57717678-57720320
ID3	PMEPA1	chr20-57722493-57723386
SOX11	PMEPA1	chr20-57724901-57725962
ID3	PMEPA1	chr20-57726870-57727846
LHX4	PMEPA1	chr20-57747959-57749751
ZNF367	PMEPA1	chr20-57747959-57749751
SMAD7	PMEPA1	chr20-57747959-57749751
LHX4	PMEPA1	chr20-57753218-57754462
SOX11	PMEPA1	chr20-57753218-57754462
LEF1	PMEPA1	chr20-57753218-57754462
SOX11	PMEPA1	chr20-57756194-57756963
SOX11	PMEPA1	chr20-57768460-57769267
HES6	PMEPA1	chr20-57770557-57771589
SOX11	PMEPA1	chr20-57772029-57773066
GLI2	PMEPA1	chr20-57782477-57783483
ID3	PMEPA1	chr20-57786985-57788877
SOX11	PMEPA1	chr20-57786985-57788877
GLI2	PMEPA1	chr20-57786985-57788877
LHX4	PMEPA1	chr20-57792056-57793653
SOX11	PMEPA1	chr20-57792056-57793653
SOX11	PMEPA1	chr20-57797708-57798723
GLI2	PMEPA1	chr20-57797708-57798723
SOX11	PMEPA1	chr20-57802742-57805229
GLI2	PMEPA1	chr20-57802742-57805229
ZNF600	C20orf85	chr20-58052285-58053175
ZNF600	C20orf85	chr20-58054447-58055749
MECOM	C20orf85	chr20-58056516-58057776
TBX20	C20orf85	chr20-58056516-58057776
MECOM	C20orf85	chr20-58069728-58070906
ZNF600	C20orf85	chr20-58073357-58073666
ZNF600	C20orf85	chr20-58074446-58076736
ZNF600	C20orf85	chr20-58084849-58085841
MECOM	C20orf85	chr20-58129435-58132280
ZNF600	C20orf85	chr20-58129435-58132280
ZNF600	C20orf85	chr20-58148770-58149576
ZNF600	C20orf85	chr20-58149868-58150903
SOX11	GNAS	chr20-58746412-58747310
ZNF367	GNAS	chr20-58746412-58747310
EGR1	GNAS	chr20-58784085-58785160
SOX11	GNAS	chr20-58787413-58788282
ID3	GNAS	chr20-58790171-58791120
NFIA	GNAS	chr20-58793641-58794500
SOX11	GNAS	chr20-58794693-58795728
EGR1	GNAS	chr20-58815350-58816517
TFAP2B	GNAS	chr20-58815350-58816517
ID3	GNAS	chr20-58823068-58824065
NFIA	GNAS	chr20-58823068-58824065
SOX11	GNAS	chr20-58823068-58824065
E2F8	GNAS	chr20-58824406-58825336
E2F7	GNAS	chr20-58824406-58825336
SOX11	GNAS	chr20-58829192-58830079
EBF3	GNAS	chr20-58839232-58839717
ID3	GNAS	chr20-58850358-58852713
SOX11	GNAS	chr20-58850358-58852713
HES6	GNAS	chr20-58850358-58852713
EGR1	GNAS	chr20-58850358-58852713
TFAP2B	GNAS	chr20-58850358-58852713
EBF3	GNAS	chr20-58850358-58852713
TFAP2B	GNAS	chr20-58855334-58855553
SOX11	GNAS	chr20-58868445-58869311
TFAP2B	GNAS	chr20-58868445-58869311
E2F8	GNAS	chr20-58868445-58869311
TFAP2B	GNAS	chr20-58869913-58871094
ID3	GNAS	chr20-58877494-58878522
SOX11	GNAS	chr20-58877494-58878522
SOX11	GNAS	chr20-58883044-58884093
TFAP2B	GNAS	chr20-58889550-58890642
E2F7	GNAS	chr20-58889550-58890642
EGR1	GNAS	chr20-58890790-58891301
LHX9	GNAS	chr20-58892507-58894125
SOX11	GNAS	chr20-58892507-58894125
IRX2	GNAS	chr20-58892507-58894125
MYBL1	GNAS	chr20-58892507-58894125
E2F8	GNAS	chr20-58892507-58894125
ZFHX3	GNAS	chr20-58892507-58894125
EGR1	GNAS	chr20-58899508-58899948
ATOH7	GNAS	chr20-58899508-58899948
ID3	GNAS	chr20-58900411-58900699
SOX11	GNAS	chr20-58900411-58900699
ATOH7	GNAS	chr20-58900411-58900699
E2F8	GNAS	chr20-58900411-58900699
ID3	GNAS	chr20-58901254-58902280
LHX9	GNAS	chr20-58901254-58902280
ATOH7	GNAS	chr20-58901254-58902280
SMAD7	GNAS	chr20-58907501-58908444
ZFHX3	PHACTR3	chr20-59516040-59516212
MYC	PHACTR3	chr20-59575989-59577508
ZFHX3	PHACTR3	chr20-59654284-59655362
ZFHX3	PHACTR3	chr20-59735754-59736718
E2F2	PHACTR3	chr20-59810095-59810985
MYBL1	CDH4	chr20-61156208-61157179
ZEB1	CDH4	chr20-61156208-61157179
HMGA2	CDH4	chr20-61156208-61157179
HMGA2	CDH4	chr20-61159645-61160558
NFIB	CDH4	chr20-61161329-61162304
ZEB1	CDH4	chr20-61161329-61162304
HMGA2	CDH4	chr20-61161329-61162304
HES6	CDH4	chr20-61163529-61164439
NFIB	CDH4	chr20-61169851-61170937
HMGA2	CDH4	chr20-61181219-61182320
NFIB	CDH4	chr20-61187160-61188807
ZEB1	CDH4	chr20-61187160-61188807
NFIB	CDH4	chr20-61192397-61193138
HMGA2	CDH4	chr20-61196840-61197805
ZEB1	CDH4	chr20-61202368-61204022
NFIB	CDH4	chr20-61216954-61217824
ZEB1	CDH4	chr20-61216954-61217824
NFIB	CDH4	chr20-61220412-61221309
ZEB1	CDH4	chr20-61220412-61221309
HMGA2	CDH4	chr20-61220412-61221309
ZEB1	CDH4	chr20-61247005-61247939
HMGA2	CDH4	chr20-61247005-61247939
ZEB1	CDH4	chr20-61251594-61252425
NFIB	CDH4	chr20-61252571-61254804
HMGA2	CDH4	chr20-61256221-61257114
HMGA2	CDH4	chr20-61257394-61258250
ZEB1	CDH4	chr20-61263813-61264277
ZEB1	CDH4	chr20-61265573-61266513
HMGA2	CDH4	chr20-61265573-61266513
HMGA2	CDH4	chr20-61269316-61270448
NFIB	CDH4	chr20-61271042-61272473
HMGA2	CDH4	chr20-61271042-61272473
ZEB1	CDH4	chr20-61285786-61286733
HMGA2	CDH4	chr20-61287180-61289103
NFIB	CDH4	chr20-61297774-61298677
NFIB	CDH4	chr20-61300429-61302450
HMGA2	CDH4	chr20-61300429-61302450
ZEB1	CDH4	chr20-61306898-61307630
NFIB	CDH4	chr20-61307637-61308775
NFIB	CDH4	chr20-61312632-61313662
ZEB1	CDH4	chr20-61312632-61313662
ZEB1	CDH4	chr20-61316182-61317137
HMGA2	CDH4	chr20-61316182-61317137
NFIB	CDH4	chr20-61320538-61321602
ZEB1	CDH4	chr20-61320538-61321602
NFIB	CDH4	chr20-61328934-61329847
ZEB1	CDH4	chr20-61331163-61332087
HMGA2	CDH4	chr20-61334070-61334989
HMGA2	CDH4	chr20-61339827-61340794
HMGA2	CDH4	chr20-61343585-61344521
HES6	CDH4	chr20-61352269-61357206
NFIB	CDH4	chr20-61352269-61357206
ZEB1	CDH4	chr20-61352269-61357206
HMGA2	CDH4	chr20-61352269-61357206
HES6	CDH4	chr20-61358435-61359582
HMGA2	CDH4	chr20-61358435-61359582
NFIB	CDH4	chr20-61366704-61367731
HMGA2	CDH4	chr20-61366704-61367731
HES6	CDH4	chr20-61370856-61373683
NFIB	CDH4	chr20-61370856-61373683
ZEB1	CDH4	chr20-61370856-61373683
HMGA2	CDH4	chr20-61379680-61380628
HES6	CDH4	chr20-61390988-61391604
ZEB1	CDH4	chr20-61390988-61391604
ZEB1	CDH4	chr20-61391664-61393556
ZEB1	CDH4	chr20-61398826-61399009
NFIB	CDH4	chr20-61403816-61404828
ZEB1	CDH4	chr20-61403816-61404828
HMGA2	CDH4	chr20-61403816-61404828
NFIB	CDH4	chr20-61411214-61412190
NFIB	CDH4	chr20-61419147-61420991
ZEB1	CDH4	chr20-61419147-61420991
ZEB1	CDH4	chr20-61426285-61427779
HMGA2	CDH4	chr20-61426285-61427779
NFIB	CDH4	chr20-61429952-61430892
ZEB1	CDH4	chr20-61429952-61430892
ZEB1	CDH4	chr20-61433607-61434624
HMGA2	CDH4	chr20-61437548-61438120
ZEB1	CDH4	chr20-61440446-61441207
HMGA2	CDH4	chr20-61443183-61444158
NFIB	CDH4	chr20-61445057-61446087
ZEB1	CDH4	chr20-61448736-61449698
HMGA2	CDH4	chr20-61448736-61449698
ZEB1	CDH4	chr20-61451794-61452704
HMGA2	CDH4	chr20-61451794-61452704
NFIB	CDH4	chr20-61460276-61462238
ZEB1	CDH4	chr20-61460276-61462238
HMGA2	CDH4	chr20-61460276-61462238
MYBL1	CDH4	chr20-61464330-61465214
HES6	CDH4	chr20-61465902-61466833
NFIB	CDH4	chr20-61465902-61466833
ZEB1	CDH4	chr20-61493263-61494228
NFIB	CDH4	chr20-61494921-61495885
ZEB1	CDH4	chr20-61494921-61495885
HMGA2	CDH4	chr20-61494921-61495885
NFIB	CDH4	chr20-61499521-61500412
ZEB1	CDH4	chr20-61499521-61500412
NFIB	CDH4	chr20-61500726-61501679
ZEB1	CDH4	chr20-61500726-61501679
NFIB	CDH4	chr20-61504155-61505918
ZEB1	CDH4	chr20-61504155-61505918
HMGA2	CDH4	chr20-61504155-61505918
HES6	CDH4	chr20-61508297-61509348
ZEB1	CDH4	chr20-61508297-61509348
ZEB1	CDH4	chr20-61511919-61513012
HMGA2	CDH4	chr20-61511919-61513012
HES6	CDH4	chr20-61515753-61517174
NFIB	CDH4	chr20-61515753-61517174
ZEB1	CDH4	chr20-61515753-61517174
NFIB	CDH4	chr20-61525103-61526281
ZEB1	CDH4	chr20-61530289-61531304
HMGA2	CDH4	chr20-61531357-61532441
HES6	CDH4	chr20-61538015-61538983
ZEB1	CDH4	chr20-61538015-61538983
ZEB1	CDH4	chr20-61539436-61540339
HMGA2	CDH4	chr20-61558499-61559857
NFIB	CDH4	chr20-61562439-61563784
HES6	CDH4	chr20-61566632-61567436
HMGA2	CDH4	chr20-61576465-61576928
ZEB1	CDH4	chr20-61581935-61582240
ZEB1	CDH4	chr20-61584442-61585435
HMGA2	CDH4	chr20-61584442-61585435
HMGA2	CDH4	chr20-61588213-61589146
HES6	CDH4	chr20-61589774-61591208
ZEB1	CDH4	chr20-61589774-61591208
HMGA2	CDH4	chr20-61589774-61591208
ZEB1	CDH4	chr20-61593778-61594706
HES6	CDH4	chr20-61604259-61605586
NFIB	CDH4	chr20-61604259-61605586
HES6	CDH4	chr20-61607738-61610025
ZEB1	CDH4	chr20-61607738-61610025
HMGA2	CDH4	chr20-61607738-61610025
NFIB	CDH4	chr20-61613762-61614860
ZEB1	CDH4	chr20-61613762-61614860
HES6	CDH4	chr20-61628103-61630701
ZEB1	CDH4	chr20-61628103-61630701
HMGA2	CDH4	chr20-61628103-61630701
ZEB1	CDH4	chr20-61636608-61636816
HES6	CDH4	chr20-61638666-61639656
HES6	CDH4	chr20-61640058-61641414
ZEB1	CDH4	chr20-61640058-61641414
MYBL1	CDH4	chr20-61644234-61645174
ZEB1	CDH4	chr20-61647529-61648677
ZEB1	CDH4	chr20-61657624-61658423
ZEB1	CDH4	chr20-61659330-61660397
HMGA2	CDH4	chr20-61659330-61660397
NFIB	CDH4	chr20-61662439-61663492
ZEB1	CDH4	chr20-61662439-61663492
NFIB	CDH4	chr20-61665434-61666010
ZEB1	CDH4	chr20-61665434-61666010
ZEB1	CDH4	chr20-61667430-61669093
HES6	CDH4	chr20-61672908-61674948
NFIB	CDH4	chr20-61672908-61674948
ZEB1	CDH4	chr20-61675792-61676603
NFIB	CDH4	chr20-61679792-61680493
NFIB	CDH4	chr20-61683453-61684513
ZEB1	CDH4	chr20-61683453-61684513
ZEB1	CDH4	chr20-61692987-61693869
HES6	CDH4	chr20-61698677-61700455
ZEB1	CDH4	chr20-61698677-61700455
ZEB1	CDH4	chr20-61705225-61706271
ZEB1	CDH4	chr20-61708297-61709223
NFIB	CDH4	chr20-61712514-61713153
ZEB1	CDH4	chr20-61718245-61719145
HES6	CDH4	chr20-61719672-61722933
NFIB	CDH4	chr20-61719672-61722933
HMGA2	CDH4	chr20-61719672-61722933
NFIB	CDH4	chr20-61724032-61725013
ZEB1	CDH4	chr20-61724032-61725013
HMGA2	CDH4	chr20-61724032-61725013
ZEB1	CDH4	chr20-61728719-61729683
ZEB1	CDH4	chr20-61732606-61735665
HMGA2	CDH4	chr20-61732606-61735665
HMGA2	CDH4	chr20-61741748-61742586
ZEB1	CDH4	chr20-61742883-61743562
ZEB1	CDH4	chr20-61752944-61753972
HMGA2	CDH4	chr20-61752944-61753972
ZEB1	CDH4	chr20-61768414-61769411
HMGA2	CDH4	chr20-61768414-61769411
ZEB1	CDH4	chr20-61784614-61785706
HMGA2	CDH4	chr20-61785917-61786896
HMGA2	CDH4	chr20-61789226-61790160
NFIB	CDH4	chr20-61795451-61796473
HES6	CDH4	chr20-61802676-61804614
ZEB1	CDH4	chr20-61802676-61804614
HES6	CDH4	chr20-61809195-61810084
ZEB1	CDH4	chr20-61809195-61810084
NFIB	CDH4	chr20-61824290-61825227
HMGA2	CDH4	chr20-61824290-61825227
ZEB1	CDH4	chr20-61834377-61835181
ZEB1	CDH4	chr20-61844824-61845882
NFIB	CDH4	chr20-61869633-61870583
NFIB	CDH4	chr20-61874375-61876269
NFIB	CDH4	chr20-61882755-61883706
NFIB	CDH4	chr20-61895905-61896973
ZEB1	CDH4	chr20-61895905-61896973
NFIB	CDH4	chr20-61899851-61900850
NFIB	CDH4	chr20-61922414-61923450
TFAP2B	HRH3	chr20-62116792-62118608
PTF1A	HRH3	chr20-62116792-62118608
TFAP2B	HRH3	chr20-62120721-62122460
PTF1A	HRH3	chr20-62120721-62122460
TFAP2B	HRH3	chr20-62142597-62143207
PTF1A	HRH3	chr20-62143890-62145068
TFAP2B	HRH3	chr20-62155401-62157799
PTF1A	HRH3	chr20-62155401-62157799
TFAP2B	HRH3	chr20-62176865-62177896
TFAP2B	HRH3	chr20-62182485-62183028
TFAP2B	HRH3	chr20-62203569-62204124
PTF1A	HRH3	chr20-62203569-62204124
TFAP2B	HRH3	chr20-62207184-62213022
PTF1A	HRH3	chr20-62207184-62213022
PTF1A	HRH3	chr20-62214068-62214969
TFAP2B	HRH3	chr20-62217916-62218490
PTF1A	HRH3	chr20-62220268-62222841
TFAP2B	HRH3	chr20-62223709-62224198
TFAP2B	HRH3	chr20-62227394-62229132
TFAP2B	HRH3	chr20-62234368-62234977
PTF1A	HRH3	chr20-62235364-62235471
TFAP2B	HRH3	chr20-62246133-62247851
PTF1A	HRH3	chr20-62246133-62247851
PTF1A	HRH3	chr20-62260126-62261024
TFAP2B	HRH3	chr20-62269488-62270416
PTF1A	HRH3	chr20-62269488-62270416
TFAP2B	HRH3	chr20-62286450-62286582
TFAP2B	HRH3	chr20-62292957-62293784
TFAP2B	HRH3	chr20-62303050-62303257
PTF1A	HRH3	chr20-62303050-62303257
PTF1A	HRH3	chr20-62317024-62317344
TFAP2B	RPS21	chr20-62286712-62287266
HMGA2	RPS21	chr20-62286712-62287266
SOX11	RPS21	chr20-62292957-62293784
HES6	RPS21	chr20-62292957-62293784
TFAP2B	RPS21	chr20-62292957-62293784
MYC	RPS21	chr20-62292957-62293784
NFIB	RPS21	chr20-62292957-62293784
HMGA2	RPS21	chr20-62292957-62293784
ONECUT2	RPS21	chr20-62292957-62293784
ID3	RPS21	chr20-62301485-62302092
HMGA2	RPS21	chr20-62301485-62302092
TFAP2B	RPS21	chr20-62303050-62303257
PTF1A	RPS21	chr20-62303050-62303257
SOX11	RPS21	chr20-62303782-62304158
PTF1A	RPS21	chr20-62317024-62317344
PTF1A	RPS21	chr20-62320891-62321925
SOX11	RPS21	chr20-62374004-62378285
TFAP2B	RPS21	chr20-62374004-62378285
MYC	RPS21	chr20-62374004-62378285
NFIB	RPS21	chr20-62374004-62378285
PTF1A	RPS21	chr20-62374004-62378285
HMGA2	RPS21	chr20-62374004-62378285
ONECUT2	RPS21	chr20-62374004-62378285
NFIB	RPS21	chr20-62380589-62380990
PTF1A	RPS21	chr20-62382135-62383322
HMGA2	RPS21	chr20-62382135-62383322
SOX11	RPS21	chr20-62385326-62387115
TFAP2B	RPS21	chr20-62385326-62387115
PTF1A	RPS21	chr20-62385326-62387115
HMGA2	RPS21	chr20-62385326-62387115
THAP8	GATA5	chr20-62399769-62400693
THAP8	GATA5	chr20-62401182-62403407
THAP8	GATA5	chr20-62404768-62406914
THAP8	GATA5	chr20-62415288-62415577
THAP8	GATA5	chr20-62445749-62447775
THAP8	GATA5	chr20-62454912-62457225
THAP8	GATA5	chr20-62464992-62465237
THAP8	GATA5	chr20-62484843-62488220
THAP8	GATA5	chr20-62495409-62497340
THAP8	GATA5	chr20-62506965-62509328
THAP8	GATA5	chr20-62529428-62532354
THAP8	GATA5	chr20-62538828-62539497
THAP8	GATA5	chr20-62553596-62559276
AHRR	SLC17A9	chr20-62861764-62863097
AHRR	SLC17A9	chr20-62873399-62874438
AHRR	SLC17A9	chr20-62924250-62926431
MYBL2	SLC17A9	chr20-62926504-62927588
ATOH7	NKAIN4	chr20-63167151-63171886
HES6	NKAIN4	chr20-63206030-63207009
HES6	NKAIN4	chr20-63216235-63217639
SNAI1	NKAIN4	chr20-63216235-63217639
HES6	NKAIN4	chr20-63238615-63239161
ATOH7	NKAIN4	chr20-63242761-63243849
LHX9	NKAIN4	chr20-63264014-63265819
HES6	NKAIN4	chr20-63295190-63297909
ATOH7	NKAIN4	chr20-63312935-63313116
EGR1	COL20A1	chr20-63206030-63207009
EGR1	COL20A1	chr20-63216235-63217639
MYT1L	COL20A1	chr20-63230492-63231509
EGR1	COL20A1	chr20-63234500-63235882
EGR1	COL20A1	chr20-63242761-63243849
NR1I3	COL20A1	chr20-63250378-63253217
EGR1	COL20A1	chr20-63253438-63254396
EGR1	COL20A1	chr20-63258626-63263309
EGR1	COL20A1	chr20-63264014-63265819
EGR1	COL20A1	chr20-63267636-63269781
EGR1	COL20A1	chr20-63271934-63272581
EGR1	COL20A1	chr20-63293276-63295039
EGR1	COL20A1	chr20-63310511-63311393
EGR1	COL20A1	chr20-63315026-63315400
EGR1	COL20A1	chr20-63328499-63329152
EGR1	COL20A1	chr20-63330407-63330719
TFAP2B	EEF1A2	chr20-63393630-63396405
EBF3	EEF1A2	chr20-63393630-63396405
TFAP2B	EEF1A2	chr20-63397213-63399468
MYC	EEF1A2	chr20-63397213-63399468
EBF3	EEF1A2	chr20-63397213-63399468
EBF3	EEF1A2	chr20-63399929-63400209
EBF3	EEF1A2	chr20-63408030-63408212
TFAP2B	EEF1A2	chr20-63408537-63409960
MYC	EEF1A2	chr20-63410010-63411774
TFAP2B	EEF1A2	chr20-63415403-63419618
MYC	EEF1A2	chr20-63415403-63419618
EBF3	EEF1A2	chr20-63415403-63419618
TFAP2B	EEF1A2	chr20-63421378-63422618
MYC	EEF1A2	chr20-63421378-63422618
EBF3	EEF1A2	chr20-63424207-63424327
EBF3	EEF1A2	chr20-63428063-63428366
TFAP2B	EEF1A2	chr20-63428436-63428839
TFAP2B	EEF1A2	chr20-63441680-63442405
TFAP2B	EEF1A2	chr20-63446227-63446746
EBF3	EEF1A2	chr20-63446227-63446746
TFAP2B	EEF1A2	chr20-63449527-63453679
MYC	EEF1A2	chr20-63449527-63453679
EBF3	EEF1A2	chr20-63449527-63453679
TFAP2B	EEF1A2	chr20-63456292-63458387
EBF3	EEF1A2	chr20-63456292-63458387
TFAP2B	EEF1A2	chr20-63461046-63461865
EBF3	EEF1A2	chr20-63461046-63461865
TFAP2B	EEF1A2	chr20-63465241-63466432
TFAP2B	EEF1A2	chr20-63468367-63470864
MYC	EEF1A2	chr20-63468367-63470864
EBF3	EEF1A2	chr20-63468367-63470864
TFAP2B	EEF1A2	chr20-63478121-63479576
TFAP2B	EEF1A2	chr20-63481541-63485678
EBF3	EEF1A2	chr20-63481541-63485678
TFAP2B	EEF1A2	chr20-63488426-63488917
TFAP2B	EEF1A2	chr20-63496036-63497619
MYC	EEF1A2	chr20-63499316-63503826
EBF3	EEF1A2	chr20-63499316-63503826
TFAP2B	EEF1A2	chr20-63517933-63520723
MYC	EEF1A2	chr20-63517933-63520723
EBF3	EEF1A2	chr20-63517933-63520723
TFAP2B	EEF1A2	chr20-63529724-63530077
EBF3	EEF1A2	chr20-63530232-63530745
EBF3	EEF1A2	chr20-63532688-63532802
TFAP2B	EEF1A2	chr20-63534316-63534937
MYC	EEF1A2	chr20-63534316-63534937
EBF3	EEF1A2	chr20-63534316-63534937
TFAP2B	EEF1A2	chr20-63547505-63547890
TFAP2B	EEF1A2	chr20-63549589-63553019
EBF3	EEF1A2	chr20-63549589-63553019
TFAP2B	EEF1A2	chr20-63556709-63557426
EBF3	EEF1A2	chr20-63556709-63557426
TFAP2B	EEF1A2	chr20-63573222-63574183
TFAP2B	EEF1A2	chr20-63580571-63581546
EBF3	EEF1A2	chr20-63580571-63581546
EBF3	EEF1A2	chr20-63582730-63583637
ID3	PPDPF	chr20-63421378-63422618
TFAP2B	PPDPF	chr20-63421378-63422618
TFAP2B	PPDPF	chr20-63428436-63428839
TFAP2B	PPDPF	chr20-63441680-63442405
TFAP2B	PPDPF	chr20-63446227-63446746
ID3	PPDPF	chr20-63447452-63448780
ID3	PPDPF	chr20-63449527-63453679
TFAP2B	PPDPF	chr20-63449527-63453679
ID3	PPDPF	chr20-63456292-63458387
TFAP2B	PPDPF	chr20-63456292-63458387
TFAP2B	PPDPF	chr20-63461046-63461865
ID3	PPDPF	chr20-63465241-63466432
TFAP2B	PPDPF	chr20-63465241-63466432
TFAP2B	PPDPF	chr20-63468367-63470864
ID3	PPDPF	chr20-63472678-63476038
[truncated: 65,793 more rows]

## Sheet: Cone GRN
tf	target	region
ZBTB7C	NRSN2	chr20-278642-279171
ELMSAN1	NRSN2	chr20-289746-290258
ELMSAN1	NRSN2	chr20-308695-311603
ELMSAN1	NRSN2	chr20-316043-316988
ELMSAN1	NRSN2	chr20-330225-331952
ELMSAN1	NRSN2	chr20-345896-346781
GATA2	TRIB3	chr20-266447-267185
ELMSAN1	TRIB3	chr20-289746-290258
GATA2	TRIB3	chr20-300823-301794
ELMSAN1	TRIB3	chr20-308695-311603
ZNF808	TRIB3	chr20-308695-311603
TFDP1	TRIB3	chr20-323013-325594
ELMSAN1	TRIB3	chr20-345896-346781
GRHL1	RBCK1	chr20-308695-311603
TFAP2B	RBCK1	chr20-308695-311603
GRHL1	RBCK1	chr20-316043-316988
TFAP2B	RBCK1	chr20-323013-325594
TFAP2B	RBCK1	chr20-347143-347433
ELMSAN1	TBC1D20	chr20-345896-346781
SRF	TBC1D20	chr20-348393-349248
ZNF785	TBC1D20	chr20-348393-349248
ELMSAN1	TBC1D20	chr20-354869-355255
ZNF787	TBC1D20	chr20-380486-380616
CREB3L1	TBC1D20	chr20-381501-382432
ZNF785	TBC1D20	chr20-381501-382432
ZNF785	TBC1D20	chr20-407020-407497
ELMSAN1	TBC1D20	chr20-407672-408049
ZNF787	TBC1D20	chr20-461466-462335
ELMSAN1	TBC1D20	chr20-542725-543671
ZNF785	TBC1D20	chr20-542725-543671
TFAP2B	SCRT2	chr20-574064-575132
TFDP1	SNPH	chr20-1226399-1227167
ZNF787	SNPH	chr20-1226399-1227167
ZNF417	NSFL1C	chr20-1466088-1466719
ZNF512B	ZNF343	chr20-2523994-2524454
ZNF225	EBF4	chr20-2651607-2652144
NFIB	EBF4	chr20-2691637-2692877
ZNF280B	EBF4	chr20-2691637-2692877
ZNF28	EBF4	chr20-2693783-2694958
POU2F2	UBOX5	chr20-3046738-3047356
ZNF16	ATRN	chr20-3406195-3407474
MYT1L	ATRN	chr20-3470146-3471039
ELMSAN1	CDC25B	chr20-3710573-3711469
ELMSAN1	CDC25B	chr20-3737774-3738657
TFAP2B	CDC25B	chr20-3748392-3749231
ZNF16	CDC25B	chr20-3750908-3751510
ELMSAN1	CDC25B	chr20-3754159-3754348
TFAP2B	CDC25B	chr20-3765123-3767208
GMEB1	PANK2	chr20-3818040-3820523
TCF7L1	PANK2	chr20-3818040-3820523
GATA2	PANK2	chr20-3818040-3820523
HMGA2	RNF24	chr20-3845904-3846798
ZNF28	RNF24	chr20-3845904-3846798
NFIA	RNF24	chr20-3846904-3847828
HMGA2	RNF24	chr20-3887826-3888838
CARF	RNF24	chr20-4013848-4015144
HMGA2	RNF24	chr20-4015583-4016434
PRDM5	SLC23A2	chr20-4822404-4823556
TFAP2B	SLC23A2	chr20-4822404-4823556
LIN28B	SLC23A2	chr20-4822404-4823556
PRDM5	SLC23A2	chr20-4916890-4917903
PRDM5	SLC23A2	chr20-4923899-4924794
RARB	SLC23A2	chr20-5095739-5096818
PRDM5	LINC00658	chr20-5503303-5504297
PRDM5	LINC00658	chr20-5528640-5530398
ZNF787	HAO1	chr20-8004819-8005757
CREB3L1	TMX4	chr20-8004819-8005757
SIX5	PLCB1	chr20-8018107-8018792
ZBTB7C	PLCB1	chr20-8019830-8020810
NFIA	PLCB1	chr20-8054772-8055720
NFIA	PLCB1	chr20-8297514-8298352
CARF	PLCB4	chr20-9066189-9068762
CARF	PLCB4	chr20-9107745-9108828
GMEB1	PAK5	chr20-9572269-9575329
GATA2	PAK5	chr20-9839042-9839796
EBF3	PAK5	chr20-9839042-9839796
HMGA2	JAG1	chr20-10603230-10605061
NFIA	JAG1	chr20-10639956-10640782
NFIB	JAG1	chr20-10639956-10640782
EBF3	JAG1	chr20-10639956-10640782
NFIA	JAG1	chr20-10670666-10672700
HMGA2	JAG1	chr20-10670666-10672700
HMGA2	BTBD3	chr20-11890016-11890722
TFDP1	BTBD3	chr20-11890016-11890722
MITF	SPTLC3	chr20-12916720-12917920
MAEL	SPTLC3	chr20-12965134-12967535
PRDM5	TASP1	chr20-13638166-13638893
POU2F2	TASP1	chr20-13638941-13639614
TFAP2B	ESF1	chr20-13638941-13639614
TFAP2B	ESF1	chr20-13785291-13785846
ZNF16	NDUFAF5	chr20-13784305-13784821
HMGA2	NDUFAF5	chr20-13785291-13785846
HMGA2	NDUFAF5	chr20-13800415-13801349
SOX14	PCSK2	chr20-17226380-17226990
CREB3	DSTN	chr20-17530463-17530952
ZNF512B	DSTN	chr20-17530463-17530952
TFAP2B	DSTN	chr20-17533141-17534221
POU5F1	DSTN	chr20-17536691-17537627
TFAP2B	DSTN	chr20-17569221-17569862
MAEL	RRBP1	chr20-17536691-17537627
TFAP2B	RRBP1	chr20-17569221-17569862
ZNF28	RRBP1	chr20-17569221-17569862
SRF	RRBP1	chr20-17570212-17571478
POU2F2	RRBP1	chr20-17570212-17571478
VSX1	RRBP1	chr20-17570212-17571478
ZNF28	RRBP1	chr20-17680102-17682027
MAEL	OVOL2	chr20-17966338-17967687
ZNF787	KAT14	chr20-18136969-18137872
ZNF417	KAT14	chr20-18136969-18137872
TFDP1	LINC00652	chr20-18794336-18794528
MITF	SLC24A3	chr20-19492658-19493625
NFIB	SLC24A3	chr20-19688039-19688982
NFIB	SLC24A3	chr20-19692288-19693208
REL	CRNKL1	chr20-20051687-20052291
DLX1	CRNKL1	chr20-20052759-20053320
EBF2	CST3	chr20-23636181-23637619
CREB3	CST3	chr20-23636181-23637619
ZNF785	CST3	chr20-23636181-23637619
ZNF665	ACSS1	chr20-24964023-24964374
ZNF787	ACSS1	chr20-24991846-24992593
ZNF470	VSX1	chr20-24991846-24992593
NFIA	VSX1	chr20-24992980-24996718
MYT1L	VSX1	chr20-24992980-24996718
PRDM5	VSX1	chr20-24992980-24996718
TFAP2B	VSX1	chr20-24992980-24996718
NFIB	VSX1	chr20-24992980-24996718
ZNF343	VSX1	chr20-24992980-24996718
PRDM5	VSX1	chr20-25044595-25045596
NFIA	VSX1	chr20-25048309-25051623
GRHL1	VSX1	chr20-25048309-25051623
NFIA	VSX1	chr20-25056592-25057768
PRDM5	VSX1	chr20-25080937-25081672
TCF7L1	GINS1	chr20-25317489-25320198
TCF7L1	GINS1	chr20-25353423-25354263
VSX1	GINS1	chr20-25389329-25389925
ZNF470	GINS1	chr20-25390135-25390512
TCF7L1	GINS1	chr20-25390984-25391977
TCF7L1	GINS1	chr20-25398839-25401275
ZNF28	MIR663AHG	chr20-26209463-26209742
ELMSAN1	BCL2L1	chr20-31568652-31569119
MAEL	BCL2L1	chr20-31572020-31574620
NFIB	BCL2L1	chr20-31572020-31574620
ELMSAN1	BCL2L1	chr20-31572020-31574620
CPEB1	BCL2L1	chr20-31572020-31574620
TBX20	BCL2L1	chr20-31602517-31605282
ELMSAN1	BCL2L1	chr20-31602517-31605282
TBX20	BCL2L1	chr20-31647963-31648969
GATA2	BCL2L1	chr20-31718979-31721654
NFIB	BCL2L1	chr20-31718979-31721654
GRHL1	BCL2L1	chr20-31738193-31739270
CPEB1	TPX2	chr20-31716594-31717494
DLX1	TPX2	chr20-31718979-31721654
ZNF28	TPX2	chr20-31718979-31721654
CPEB1	TPX2	chr20-31723990-31724773
FOSL2	TTLL9	chr20-31815183-31816585
ZNF785	TTLL9	chr20-31828409-31829423
TFAP2B	TTLL9	chr20-31833146-31833716
PRDM13	TTLL9	chr20-31833146-31833716
TFAP2B	TTLL9	chr20-31860286-31861066
TFAP2B	TTLL9	chr20-31879150-31879805
ELMSAN1	TM9SF4	chr20-32018163-32018942
PRDM5	TM9SF4	chr20-32028385-32028994
PRDM5	TM9SF4	chr20-32050863-32052187
PRDM5	TM9SF4	chr20-32089637-32090505
PRDM5	TM9SF4	chr20-32110040-32110604
TCF7L1	TM9SF4	chr20-32155250-32156162
ZNF28	POFUT1	chr20-32110040-32110604
GATA2	POFUT1	chr20-32206131-32207640
ZNF16	POFUT1	chr20-32206131-32207640
ZNF808	POFUT1	chr20-32206131-32207640
ELMSAN1	ASXL1	chr20-32276928-32277663
NFIB	ASXL1	chr20-32357144-32358343
ELMSAN1	ASXL1	chr20-32357144-32358343
ZNF787	ASXL1	chr20-32357144-32358343
CREB3	NOL4L	chr20-32449512-32452235
TBR1	NOL4L	chr20-32478894-32483361
TFAP2B	DNMT3B	chr20-32680796-32682284
TFAP2B	DNMT3B	chr20-32742566-32743307
REL	DNMT3B	chr20-32774735-32779851
GATA2	DNMT3B	chr20-32774735-32779851
NFIB	SNTA1	chr20-33400694-33401427
HMGA2	SNTA1	chr20-33400694-33401427
NFIB	SNTA1	chr20-33442432-33443310
HMGA2	SNTA1	chr20-33443893-33445229
NFIB	SNTA1	chr20-33456940-33457854
HMGA2	SNTA1	chr20-33465023-33466355
HMGA2	SNTA1	chr20-33488768-33490074
PRDM5	C20orf144	chr20-33662779-33663365
ZNF28	CHMP4B	chr20-33730863-33731656
ZNF16	CHMP4B	chr20-33732053-33734340
GATA2	CHMP4B	chr20-33810516-33811303
TCF24	CHMP4B	chr20-33810516-33811303
ZNF16	CHMP4B	chr20-33811659-33813443
ZNF280B	CHMP4B	chr20-33811659-33813443
EBF3	ASIP	chr20-34112333-34113466
ZNF225	PIGU	chr20-34516877-34517281
ZNF343	PIGU	chr20-34558909-34559207
TFDP1	PIGU	chr20-34559454-34559735
EBF2	PIGU	chr20-34702967-34704289
FOSL1	PIGU	chr20-34708864-34709235
PRDM13	NCOA6	chr20-34676175-34676955
HMGA2	NCOA6	chr20-34677091-34677996
HMGA2	NCOA6	chr20-34825650-34826417
TBX20	EDEM2	chr20-35092872-35093586
NFIX	EDEM2	chr20-35092872-35093586
ZNF16	EDEM2	chr20-35225998-35226653
ZNF787	PROCR	chr20-35091783-35092613
TBX20	PROCR	chr20-35092872-35093586
ZNF45	PROCR	chr20-35147365-35148044
ZNF785	MMP24	chr20-35146936-35147151
MYT1L	MMP24	chr20-35171561-35172072
TFAP2B	MMP24	chr20-35225998-35226653
ZNF225	MMP24	chr20-35268975-35269759
TCF7L1	CEP250	chr20-35412142-35412708
TCF7L1	CEP250	chr20-35438244-35439527
EBF3	CEP250	chr20-35455752-35456671
CARF	ROMO1	chr20-35600385-35602664
PRDM5	ROMO1	chr20-35600385-35602664
PRDM13	ROMO1	chr20-35615160-35615891
PRDM5	ROMO1	chr20-35617241-35617519
TFAP2B	ROMO1	chr20-35617241-35617519
ZNF785	ROMO1	chr20-35618131-35618449
GRHL1	ROMO1	chr20-35639709-35640695
ZBTB2	PHF20	chr20-35702290-35703246
ZBTB7C	PHF20	chr20-35741627-35741940
LIN28B	PHF20	chr20-35742313-35744014
ZBTB2	PHF20	chr20-35742313-35744014
EBF2	PHF20	chr20-35742313-35744014
CREB3L1	PHF20	chr20-35742313-35744014
ZBTB7C	PHF20	chr20-35770812-35771973
ZNF280B	NORAD	chr20-36063867-36064242
LIN28B	NORAD	chr20-36064564-36066014
PRDM5	AAR2	chr20-36153369-36154741
NFIB	AAR2	chr20-36153369-36154741
ZNF787	AAR2	chr20-36153369-36154741
PRDM5	AAR2	chr20-36162252-36163231
NFIB	AAR2	chr20-36199331-36200325
NFIB	AAR2	chr20-36234412-36236458
ELMSAN1	TGIF2	chr20-36541562-36543471
ELMSAN1	TGIF2	chr20-36544051-36544858
LIN28B	TGIF2	chr20-36571307-36573487
ELMSAN1	TGIF2	chr20-36571307-36573487
ZNF28	NDRG3	chr20-36571307-36573487
ZNF787	NDRG3	chr20-36571307-36573487
ZNF787	NDRG3	chr20-36604725-36605733
ZNF787	NDRG3	chr20-36772992-36773393
ZNF653	SOGA1	chr20-36744503-36746044
RARB	SAMHD1	chr20-36823844-36826860
CARF	SAMHD1	chr20-36859013-36859573
SOX14	SAMHD1	chr20-36860894-36862657
ZNF280B	SAMHD1	chr20-36860894-36862657
CREB3L1	RBL1	chr20-36950751-36951435
EBF3	RBL1	chr20-37095996-37096791
CPEB1	MROH8	chr20-37177900-37178409
ZNF16	MROH8	chr20-37251307-37252548
ZNF16	SRC	chr20-37251307-37252548
TBR1	SRC	chr20-37392003-37393744
THAP1	SRC	chr20-37392003-37393744
EBF3	SRC	chr20-37392003-37393744
CARF	NNAT	chr20-37516746-37517416
TBX20	NNAT	chr20-37519351-37520235
ELMSAN1	NNAT	chr20-37519351-37520235
HMGA2	RALGAPB	chr20-38408347-38409270
PRDM5	RALGAPB	chr20-38446013-38446577
HMGA2	RALGAPB	chr20-38446013-38446577
PRDM5	RALGAPB	chr20-38471877-38472815
HMGA2	RALGAPB	chr20-38471877-38472815
RARB	ACTR5	chr20-38658638-38659709
ZNF512B	ACTR5	chr20-38673038-38675621
ZNF808	ACTR5	chr20-38721965-38724461
PAX3	PPP1R16B	chr20-38706157-38707362
TFDP1	PPP1R16B	chr20-38721965-38724461
ZNF787	PPP1R16B	chr20-38721965-38724461
ZNF787	PPP1R16B	chr20-38748854-38749184
NFIB	PPP1R16B	chr20-38804095-38805704
TFDP1	DHX35	chr20-38882959-38884025
ZNF28	DHX35	chr20-38882959-38884025
MITF	DHX35	chr20-38961495-38962298
ZNF28	DHX35	chr20-38961495-38962298
ZNF280B	ZHX3	chr20-41137036-41137236
THAP1	ZHX3	chr20-41339738-41340919
THAP1	ZHX3	chr20-41365611-41366467
EBF3	PTPRT	chr20-42024397-42025327
GATA2	PTPRT	chr20-42062929-42063835
GATA2	PTPRT	chr20-42496718-42497610
GATA2	PTPRT	chr20-42530506-42531396
CARF	PTPRT	chr20-43191693-43192566
TCF7L1	SGK2	chr20-43458510-43459152
PRDM5	SGK2	chr20-43458510-43459152
ZNF470	SGK2	chr20-43458510-43459152
PRDM5	SGK2	chr20-43507080-43507679
EBF2	SGK2	chr20-43514062-43514412
ZNF470	SGK2	chr20-43514062-43514412
PRDM5	SGK2	chr20-43514777-43515008
PRDM5	IFT52	chr20-43507080-43507679
TFAP2B	IFT52	chr20-43507080-43507679
TFAP2B	IFT52	chr20-43514062-43514412
ZNF45	IFT52	chr20-43514062-43514412
PRDM5	IFT52	chr20-43514777-43515008
HMGA2	JPH2	chr20-44038464-44039003
HMGA2	JPH2	chr20-44080442-44081423
HMGA2	JPH2	chr20-44089681-44090619
NFE2L3	JPH2	chr20-44210792-44210959
RARB	JPH2	chr20-44246632-44247098
NFE2L3	JPH2	chr20-44253438-44253763
MYT1L	GDAP1L1	chr20-44189957-44190956
GATA2	GDAP1L1	chr20-44189957-44190956
GATA2	GDAP1L1	chr20-44210077-44210695
TFDP1	GDAP1L1	chr20-44210077-44210695
ZNF787	GDAP1L1	chr20-44246632-44247098
ZNF787	TTPAL	chr20-44475269-44475885
ELMSAN1	PKIG	chr20-44521293-44521912
ELMSAN1	PKIG	chr20-44531200-44531784
PRDM5	PKIG	chr20-44609285-44610569
GMEB1	ADA	chr20-44735980-44737119
PRDM5	LINC01260	chr20-44609285-44610569
PRDM5	LINC01260	chr20-44724993-44725398
PRDM5	LINC01260	chr20-44738547-44739424
ZNF28	PABPC1L	chr20-44809257-44810174
ZNF16	PABPC1L	chr20-44884714-44885675
CARF	STK4	chr20-44867228-44868205
EBF3	STK4	chr20-44884714-44885675
ZNF787	STK4	chr20-44884714-44885675
REL	STK4	chr20-44909326-44910061
CPEB1	STK4	chr20-44965805-44966116
TCF7L1	SDC4	chr20-45325116-45325287
TCF7L1	SDC4	chr20-45340611-45344331
GRHL1	SDC4	chr20-45363694-45364208
RARB	SDC4	chr20-45363694-45364208
ZBTB2	WFDC10B	chr20-45770935-45771997
PRDM5	WFDC3	chr20-45812797-45813005
PRDM5	WFDC3	chr20-45822431-45823213
PRDM5	WFDC3	chr20-45880474-45881226
TFDP1	ZSWIM3	chr20-45790956-45791831
ZNF470	ZSWIM3	chr20-45790956-45791831
ELMSAN1	ZSWIM3	chr20-45792110-45792535
ZNF470	ZSWIM3	chr20-45811615-45812575
ZNF28	ZSWIM3	chr20-45833329-45833657
ZNF470	ZSWIM3	chr20-45857981-45858276
ZNF787	NEURL2	chr20-45790956-45791831
EBF3	NEURL2	chr20-45811615-45812575
EBF3	NEURL2	chr20-45822431-45823213
CREB3	NEURL2	chr20-45826094-45827042
ZNF787	NEURL2	chr20-45833022-45833250
EBF3	NEURL2	chr20-45856705-45857187
ZNF787	NEURL2	chr20-45880474-45881226
EBF3	NEURL2	chr20-45912156-45912850
GRHL1	NEURL2	chr20-45932733-45934627
ZNF787	NEURL2	chr20-45970664-45971209
FOSL2	SLC13A3	chr20-46513560-46514035
GATA2	SLC13A3	chr20-46682904-46684364
TCF7L1	SLC2A10	chr20-46626069-46627029
ELMSAN1	SLC2A10	chr20-46631329-46632463
ELMSAN1	SLC2A10	chr20-46688382-46689126
ZNF225	SLC2A10	chr20-46688382-46689126
CPEB1	EYA2	chr20-47150045-47151297
KLF1	NCOA3	chr20-47500774-47501901
PRDM5	SULF2	chr20-47755691-47757188
PRDM5	SULF2	chr20-47780570-47785342
PRDM5	SULF2	chr20-47867454-47868326
MYT1L	PREX1	chr20-48597536-48599102
MYT1L	PREX1	chr20-48619396-48622184
MYT1L	PREX1	chr20-48824495-48827641
PRDM5	ARFGEF2	chr20-48824495-48827641
EBF3	ARFGEF2	chr20-48827884-48829074
NFE2L3	ARFGEF2	chr20-48832301-48832909
PRDM5	ARFGEF2	chr20-48846292-48847343
NFIB	ARFGEF2	chr20-48850245-48851238
EBF3	ARFGEF2	chr20-48857900-48858811
PRDM5	ARFGEF2	chr20-48919381-48921889
EBF3	ARFGEF2	chr20-48919381-48921889
ZNF45	ARFGEF2	chr20-48919381-48921889
ZNF512B	ARFGEF2	chr20-48919381-48921889
FOSL2	KCNB1	chr20-49218569-49219294
NFIB	KCNB1	chr20-49218569-49219294
HMGA2	KCNB1	chr20-49218569-49219294
NFE2L3	KCNB1	chr20-49219542-49220697
POU5F1	KCNB1	chr20-49275968-49277929
NFIB	KCNB1	chr20-49275968-49277929
NFKB2	KCNB1	chr20-49275968-49277929
HMGA2	KCNB1	chr20-49275968-49277929
NFIB	KCNB1	chr20-49481643-49481913
RARB	PTGIS	chr20-49444352-49445285
NFKB2	B4GALT5	chr20-49567415-49568042
HMGA2	TMEM189	chr20-50070814-50071954
ZNF417	TMEM189	chr20-50112268-50113106
HMGA2	TMEM189	chr20-50113199-50114944
THAP1	TMEM189	chr20-50152612-50153516
ZNF417	TMEM189	chr20-50153735-50154787
HMGA2	TMEM189	chr20-50171388-50171621
ELMSAN1	LINC01273	chr20-50085150-50086091
TFAP2B	LINC01273	chr20-50112268-50113106
ELMSAN1	LINC01273	chr20-50112268-50113106
ZNF787	LINC01273	chr20-50112268-50113106
HMGA2	LINC01273	chr20-50113199-50114944
NFIB	LINC01273	chr20-50115960-50116904
NFIB	LINC01273	chr20-50152612-50153516
ELMSAN1	LINC01273	chr20-50152612-50153516
POU2F2	LINC01273	chr20-50153735-50154787
HMGA2	LINC01273	chr20-50165472-50166029
HMGA2	LINC01273	chr20-50171388-50171621
ZNF787	LINC01273	chr20-50171388-50171621
NFIB	LINC01273	chr20-50171743-50172549
MYT1L	CEBPB	chr20-50113199-50114944
GATA2	CEBPB	chr20-50135753-50136692
SOX14	CEBPB	chr20-50152612-50153516
CPEB1	PTPN1	chr20-50509341-50510320
NFIA	PARD6B	chr20-50730108-50731543
HMGA2	PARD6B	chr20-50730108-50731543
ZNF28	PARD6B	chr20-50731853-50732601
REL	ATP9A	chr20-51677882-51681091
CPEB1	ATP9A	chr20-51677882-51681091
REL	ATP9A	chr20-51766564-51768301
REL	ATP9A	chr20-51799939-51801490
ZBTB2	LINC01429	chr20-51766564-51768301
ZNF417	LINC01429	chr20-51766564-51768301
ZNF785	LINC01429	chr20-51799939-51801490
ZNF417	LINC01429	chr20-51799939-51801490
CPEB1	TSHZ2	chr20-53467776-53468756
REL	FAM210B	chr20-56358040-56358914
GMEB1	AURKA	chr20-56343627-56344559
TCF7L1	AURKA	chr20-56359192-56360181
POU2F2	AURKA	chr20-56392816-56393394
POU2F2	AURKA	chr20-56467721-56468584
ZNF28	CSTF1	chr20-56359192-56360181
ZNF28	CSTF1	chr20-56391476-56391942
ZNF512B	CSTF1	chr20-56392816-56393394
MYT1L	C20orf85	chr20-58113457-58114377
MYT1L	C20orf85	chr20-58129435-58132280
DLX1	APCDD1L	chr20-58388523-58389121
ZNF787	ZNF831	chr20-59042910-59044108
ZNF787	ZNF831	chr20-59213837-59214879
TFAP2B	PHACTR3	chr20-59575989-59577508
NFIA	PHACTR3	chr20-59648192-59649188
PRDM5	FAM217B	chr20-59933854-59934667
PRDM5	FAM217B	chr20-59940536-59941746
ZNF225	CDH26	chr20-59940536-59941746
NFIA	MIR646HG	chr20-60009111-60012325
RARB	MIR646HG	chr20-60009111-60012325
CARF	MIR646HG	chr20-60273451-60274480
NFIB	MIR646HG	chr20-60331585-60331900
ZNF785	LAMA5	chr20-62217916-62218490
ZNF785	LAMA5	chr20-62234368-62234977
ZNF785	LAMA5	chr20-62303782-62304158
GATA2	LAMA5	chr20-62374004-62378285
PRDM5	RPS21	chr20-62301485-62302092
ZNF787	RPS21	chr20-62301485-62302092
ZNF787	CABLES2	chr20-62301485-62302092
TFDP1	CABLES2	chr20-62374004-62378285
ZNF787	CABLES2	chr20-62385326-62387115
TFDP1	CABLES2	chr20-62407286-62410236
ZNF787	CABLES2	chr20-62407286-62410236
ZBTB7C	OGFR	chr20-62707185-62708836
ELMSAN1	SLC17A9	chr20-62860309-62861023
ZBTB7C	SLC17A9	chr20-62861764-62863097
ZNF665	SLC17A9	chr20-62861764-62863097
ELMSAN1	SLC17A9	chr20-62936885-62937795
ZNF665	SLC17A9	chr20-62936885-62937795
NFIB	NKAIN4	chr20-63154119-63156745
ZNF28	NKAIN4	chr20-63216235-63217639
NFIB	NKAIN4	chr20-63223020-63225289
NFIB	NKAIN4	chr20-63250378-63253217
CARF	NKAIN4	chr20-63258626-63263309
MAEL	EEF1A2	chr20-63408537-63409960
HMGA2	EEF1A2	chr20-63446838-63447375
HMGA2	EEF1A2	chr20-63449527-63453679
NFIB	RTEL1	chr20-63573222-63574183
ZNF785	RTEL1	chr20-63573222-63574183
ZNF28	RTEL1	chr20-63625601-63626955
NFIB	RTEL1	chr20-63627042-63630245
REL	RTEL1	chr20-63636829-63637859
ZNF28	RTEL1	chr20-63639035-63639704
NFIB	RTEL1	chr20-63651230-63652147
ZNF785	RTEL1	chr20-63653428-63655572
SIX5	RTEL1	chr20-63658467-63658629
ZNF28	RTEL1	chr20-63658714-63659232
ZNF28	RTEL1	chr20-63688051-63688138
ZNF28	RTEL1	chr20-63694975-63695065
GATA2	ZBTB46	chr20-63651230-63652147
SRF	ZBTB46	chr20-63651230-63652147
NFIB	ZBTB46	chr20-63651230-63652147
TCF24	ZBTB46	chr20-63653428-63655572
ZNF808	ZBTB46	chr20-63658714-63659232
NFIA	ZBTB46	chr20-63829935-63831096
MYT1L	ZBTB46	chr20-63829935-63831096
THAP1	UCKL1	chr20-63953779-63956259
CARF	ZNF512B	chr20-63863810-63865227
ERF	ZNF512B	chr20-63863810-63865227
CARF	ZNF512B	chr20-63947139-63948224
RARB	ZNF512B	chr20-63947139-63948224
PKNOX2	ZNF512B	chr20-63947139-63948224
ZNF470	SAMD10	chr20-63894059-63895181
EBF3	PLEKHN1	chr1-902406-904833
CPEB1	PLEKHN1	chr1-902406-904833
EBF3	PLEKHN1	chr1-928511-930154
CPEB1	PLEKHN1	chr1-931090-934136
EBF3	PLEKHN1	chr1-951239-951990
PRDM13	C1orf159	chr1-1031032-1034105
ZNF665	C1orf159	chr1-1031032-1034105
PRDM13	C1orf159	chr1-1066808-1070965
MAEL	UBE2J2	chr1-1156515-1159602
ZNF512B	UBE2J2	chr1-1173291-1173883
ZNF512B	UBE2J2	chr1-1205681-1206384
ZNF512B	UBE2J2	chr1-1231025-1231891
ZNF28	UBE2J2	chr1-1273886-1275222
ZNF28	UBE2J2	chr1-1324058-1324580
ZNF28	UBE2J2	chr1-1330103-1331313
REL	VWA1	chr1-1421770-1423239
NFE2L3	VWA1	chr1-1421770-1423239
REL	VWA1	chr1-1429743-1430538
ZNF417	ATAD3C	chr1-1349351-1350191
ZNF787	ATAD3C	chr1-1375496-1376702
ZNF417	ATAD3C	chr1-1407020-1407130
ZNF787	ATAD3C	chr1-1407314-1408184
ZNF787	ATAD3C	chr1-1429743-1430538
ZNF225	MIB2	chr1-1573740-1574477
NFKB2	MIB2	chr1-1613999-1615414
ZNF225	MIB2	chr1-1613999-1615414
ZNF787	MIB2	chr1-1613999-1615414
TFAP2B	GNB1	chr1-1692729-1695220
ZNF653	GNB1	chr1-1692729-1695220
SPIB	GNB1	chr1-1724325-1724837
TFAP2B	GNB1	chr1-1741692-1742784
PKNOX2	GNB1	chr1-1917297-1917589
ZNF16	GNB1	chr1-1918163-1918252
ZNF16	CFAP74	chr1-1890402-1890819
ELMSAN1	CFAP74	chr1-1891118-1896297
CPEB1	CFAP74	chr1-1891118-1896297
ELMSAN1	CFAP74	chr1-1905608-1911064
ZNF16	CFAP74	chr1-1918163-1918252
ELMSAN1	CFAP74	chr1-1919274-1921950
ZNF280B	CFAP74	chr1-1919274-1921950
FOSL2	SKI	chr1-2131668-2133637
TFAP2B	SKI	chr1-2131668-2133637
ZBTB7C	SKI	chr1-2131668-2133637
ZNF787	SKI	chr1-2131668-2133637
CREB3	SKI	chr1-2139610-2140566
TFAP2B	SKI	chr1-2187247-2189543
ZBTB7C	SKI	chr1-2187247-2189543
ZBTB7C	SKI	chr1-2194776-2197930
ZNF512B	HES5	chr1-2430071-2430337
NFIA	HES5	chr1-2438018-2438424
LIN28B	HES5	chr1-2441114-2448832
NFIA	HES5	chr1-2449512-2456518
ZNF512B	HES5	chr1-2589041-2589409
NFIA	HES5	chr1-2610355-2611280
REL	SMIM1	chr1-3673735-3675086
ZNF512B	SMIM1	chr1-3673735-3675086
ZNF512B	SMIM1	chr1-3770593-3771400
ZNF470	DFFB	chr1-3770593-3771400
CREB3	DFFB	chr1-3773182-3775298
REL	C1orf174	chr1-3799604-3800556
ZNF787	C1orf174	chr1-3799604-3800556
REL	C1orf174	chr1-3819146-3822775
ZNF28	C1orf174	chr1-3857215-3857266
ELMSAN1	C1orf174	chr1-3900632-3903964
ZNF225	C1orf174	chr1-3900632-3903964
REL	C1orf174	chr1-3978363-3979659
ZNF28	GPR153	chr1-6178836-6179944
ZNF28	GPR153	chr1-6206727-6207378
ZNF28	GPR153	chr1-6234640-6234885
REL	GPR153	chr1-6259030-6260824
REL	GPR153	chr1-6333569-6339432
ELMSAN1	ACOT7	chr1-6171242-6172191
TFDP1	ACOT7	chr1-6178836-6179944
ZNF808	ACOT7	chr1-6206727-6207378
ELMSAN1	ACOT7	chr1-6208308-6208617
GRHL1	ACOT7	chr1-6234640-6234885
TFDP1	ACOT7	chr1-6259030-6260824
ELMSAN1	ACOT7	chr1-6259030-6260824
ELMSAN1	ACOT7	chr1-6392111-6393256
NFIA	ESPN	chr1-6333569-6339432
RARB	ESPN	chr1-6333569-6339432
NFIB	ESPN	chr1-6333569-6339432
ELMSAN1	ESPN	chr1-6333569-6339432
ELMSAN1	ESPN	chr1-6341629-6344096
ELMSAN1	ESPN	chr1-6359345-6360209
HMGA2	ESPN	chr1-6377877-6378868
ELMSAN1	ESPN	chr1-6377877-6378868
TFAP2B	ESPN	chr1-6385814-6386338
TFAP2B	ESPN	chr1-6392111-6393256
NFIB	ESPN	chr1-6392111-6393256
ELMSAN1	ESPN	chr1-6392111-6393256
HMGA2	ESPN	chr1-6394392-6394629
ELMSAN1	ESPN	chr1-6419920-6421422
NFIB	ESPN	chr1-6422762-6424477
ELMSAN1	ESPN	chr1-6422762-6424477
ELMSAN1	ESPN	chr1-6439418-6440253
ELMSAN1	TNFRSF25	chr1-6392111-6393256
ELMSAN1	TNFRSF25	chr1-6419920-6421422
ELMSAN1	TNFRSF25	chr1-6422762-6424477
ELMSAN1	TNFRSF25	chr1-6439418-6440253
ZNF785	NOL9	chr1-6425250-6427766
REL	NOL9	chr1-6443259-6444480
ZNF785	NOL9	chr1-6484390-6485323
REL	NOL9	chr1-6488505-6490444
MITF	NOL9	chr1-6510949-6513814
NFE2L3	THAP3	chr1-6600397-6601796
EBF3	THAP3	chr1-6600397-6601796
EBF3	THAP3	chr1-6614106-6614449
EBF3	THAP3	chr1-6625293-6626244
ZNF28	DNAJC11	chr1-6554536-6555180
CARF	DNAJC11	chr1-6600397-6601796
ZNF16	DNAJC11	chr1-6603002-6603453
ZNF28	DNAJC11	chr1-6614608-6616144
ZNF16	DNAJC11	chr1-6624955-6625149
CARF	DNAJC11	chr1-6625293-6626244
ZNF343	DNAJC11	chr1-6625293-6626244
CARF	DNAJC11	chr1-6784070-6785323
ZNF28	DNAJC11	chr1-6784070-6785323
ZNF343	DNAJC11	chr1-6784070-6785323
THAP1	PER3	chr1-7678492-7684807
NFIB	PER3	chr1-7678492-7684807
ZNF785	PER3	chr1-7678492-7684807
MAEL	PER3	chr1-7701943-7706382
POU5F1	PER3	chr1-7701943-7706382
THAP1	PER3	chr1-7701943-7706382
ZNF785	PER3	chr1-7701943-7706382
NFIA	PER3	chr1-7782927-7784319
NFIB	PER3	chr1-7782927-7784319
HMGA2	ENO1	chr1-8764865-8765808
TCF7L1	ENO1	chr1-8817644-8818847
HMGA2	ENO1	chr1-8817644-8818847
HMGA2	ENO1	chr1-8876764-8878214
HMGA2	CTNNBIP1	chr1-9824527-9827305
TFDP1	CTNNBIP1	chr1-9824527-9827305
SPIB	CTNNBIP1	chr1-9824527-9827305
HMGA2	CTNNBIP1	chr1-9841137-9845306
TFDP1	CTNNBIP1	chr1-9841137-9845306
KLF1	CTNNBIP1	chr1-9841137-9845306
PKNOX2	CTNNBIP1	chr1-9860998-9861838
PRDM13	LZIC	chr1-9822511-9823642
PRDM5	LZIC	chr1-9824527-9827305
PRDM5	LZIC	chr1-9835189-9837663
PRDM5	LZIC	chr1-9841137-9845306
PRDM5	LZIC	chr1-9845796-9847501
PRDM5	LZIC	chr1-9852204-9853471
PRDM5	LZIC	chr1-9910337-9911528
PRDM5	LZIC	chr1-10032070-10032831
EBF2	LZIC	chr1-10033695-10034789
ZBTB2	NMNAT1	chr1-9841137-9845306
ZBTB7C	NMNAT1	chr1-9841137-9845306
ZNF28	NMNAT1	chr1-9841137-9845306
ZBTB7C	NMNAT1	chr1-9852204-9853471
ZBTB2	NMNAT1	chr1-9874571-9875847
ZNF28	NMNAT1	chr1-9874571-9875847
ZBTB7C	NMNAT1	chr1-9909033-9910094
ZBTB2	NMNAT1	chr1-9950089-9951024
ZBTB7C	KIF1B	chr1-10177614-10178643
EBF3	KIF1B	chr1-10209442-10210804
ZNF280B	KIF1B	chr1-10209442-10210804
ZNF787	KIF1B	chr1-10210879-10211615
ELMSAN1	PGD	chr1-10398095-10398591
THAP1	MASP2	chr1-10945964-10946470
HMGA2	EXOSC10	chr1-11011538-11012343
NFIB	EXOSC10	chr1-11059060-11059224
HMGA2	EXOSC10	chr1-11099158-11099720
PRDM5	DHRS3	chr1-12539632-12543307
PRDM5	DHRS3	chr1-12552573-12554104
PRDM5	DHRS3	chr1-12593899-12594115
PRDM5	DHRS3	chr1-12594636-12595985
GATA2	KAZN	chr1-13905567-13906513
NFIA	KAZN	chr1-14103641-14104283
GATA2	KAZN	chr1-14597541-14598703
ELMSAN1	TMEM51	chr1-15128274-15129172
ELMSAN1	TMEM51	chr1-15152785-15153732
MAEL	CTRC	chr1-15410280-15412959
ZNF16	CASP9	chr1-15408585-15409069
MAEL	CASP9	chr1-15410280-15412959
ZNF16	CASP9	chr1-15430827-15434198
POU3F2	CASP9	chr1-15500106-15502343
ZNF16	CASP9	chr1-15524890-15526190
PRDM13	DNAJC16	chr1-15426586-15427149
ZNF785	DNAJC16	chr1-15430827-15434198
PRDM13	DNAJC16	chr1-15522471-15524068
ELMSAN1	DNAJC16	chr1-15524727-15524851
GRHL1	DNAJC16	chr1-15526959-15528037
CARF	ARHGEF10L	chr1-17439725-17440820
TFAP2B	ARHGEF10L	chr1-17439725-17440820
ZNF28	ARHGEF10L	chr1-17439725-17440820
ZNF280B	ARHGEF10L	chr1-17439725-17440820
CARF	ARHGEF10L	chr1-17536234-17539834
TFAP2B	ARHGEF10L	chr1-17536234-17539834
TFAP2B	ARHGEF10L	chr1-17562711-17567943
TFAP2B	ARHGEF10L	chr1-17585357-17587459
CARF	ARHGEF10L	chr1-17669714-17678096
PRDM5	ALDH4A1	chr1-18875504-18875879
ELMSAN1	ALDH4A1	chr1-18901579-18902461
REL	ALDH4A1	chr1-18912811-18913749
PRDM5	ALDH4A1	chr1-18912811-18913749
PRDM5	ALDH4A1	chr1-18918503-18919677
PRDM5	ALDH4A1	chr1-18921801-18925203
PRDM5	ALDH4A1	chr1-18936249-18940429
ZBTB2	ALDH4A1	chr1-18936249-18940429
ELMSAN1	ALDH4A1	chr1-18936249-18940429
ELMSAN1	ALDH4A1	chr1-18953866-18955667
TFDP1	NBL1	chr1-19596140-19596976
EBF2	NBL1	chr1-19653339-19654378
RARB	PLA2G5	chr1-19967566-19968523
TCF7L1	PLA2G2C	chr1-20185427-20186084
ZNF785	MUL1	chr1-20410644-20411667
ZBTB2	MUL1	chr1-20430138-20431176
ZBTB2	MUL1	chr1-20442725-20444117
ZBTB2	MUL1	chr1-20486221-20487867
REL	ECE1	chr1-21149299-21150299
PKNOX2	ECE1	chr1-21174842-21175113
TBX20	ECE1	chr1-21176889-21178180
ZBTB7C	ECE1	chr1-21253676-21255885
REL	ECE1	chr1-21343958-21344936
REL	ECE1	chr1-21349611-21351773
TFAP2B	RAP1GAP	chr1-21508543-21509371
NFIB	RAP1GAP	chr1-21508543-21509371
TCF7L1	RAP1GAP	chr1-21568299-21569233
TCF7L1	RAP1GAP	chr1-21586113-21587971
TFAP2B	RAP1GAP	chr1-21586113-21587971
HMGA2	RAP1GAP	chr1-21630537-21631695
TCF7L1	RAP1GAP	chr1-21665917-21667597
TFAP2B	RAP1GAP	chr1-21665917-21667597
NFIB	RAP1GAP	chr1-21665917-21667597
TCF7L1	USP48	chr1-21586113-21587971
ZNF785	USP48	chr1-21586113-21587971
ZNF785	USP48	chr1-21650146-21651391
TCF7L1	USP48	chr1-21665917-21667597
NFIB	USP48	chr1-21665917-21667597
TCF7L1	USP48	chr1-21782146-21782823
LIN28B	USP48	chr1-21782146-21782823
ELMSAN1	USP48	chr1-21783607-21784818
TBR1	C1QB	chr1-22556214-22557855
TBR1	C1QB	chr1-22563730-22568870
CARF	EPHB2	chr1-22787860-22791282
TBX20	LUZP1	chr1-23018653-23019447
HMGA2	LUZP1	chr1-23019948-23021520
HMGA2	LUZP1	chr1-23103627-23104453
NFIA	TCEA3	chr1-23343160-23344210
TFAP2B	TCEA3	chr1-23343160-23344210
NFIB	TCEA3	chr1-23343160-23344210
HMGA2	TCEA3	chr1-23343160-23344210
ZNF343	TCEA3	chr1-23343160-23344210
ZNF396	TCEA3	chr1-23344337-23345881
ZNF787	TCEA3	chr1-23344337-23345881
ZNF512B	TCEA3	chr1-23344337-23345881
TFAP2B	TCEA3	chr1-23367222-23367972
RARB	TCEA3	chr1-23368387-23369365
ZNF512B	TCEA3	chr1-23368387-23369365
MYT1L	TCEA3	chr1-23369443-23373010
GRHL1	TCEA3	chr1-23369443-23373010
NFIB	TCEA3	chr1-23369443-23373010
HMGA2	TCEA3	chr1-23369443-23373010
ZNF787	TCEA3	chr1-23369443-23373010
TFAP2B	TCEA3	chr1-23423417-23424564
NFIB	TCEA3	chr1-23423417-23424564
HMGA2	TCEA3	chr1-23423417-23424564
NFIB	TCEA3	chr1-23451205-23451478
NFIB	TCEA3	chr1-23482962-23484004
ZNF787	TCEA3	chr1-23482962-23484004
TFAP2B	TCEA3	chr1-23484193-23484471
NFIB	TCEA3	chr1-23524592-23525646
ZNF665	E2F2	chr1-23423417-23424564
ZNF343	E2F2	chr1-23451529-23452448
ZNF665	E2F2	chr1-23482962-23484004
ZNF343	E2F2	chr1-23553218-23557174
ZNF343	E2F2	chr1-23559795-23563442
TBX20	E2F2	chr1-23597593-23599206
EBF3	ID3	chr1-23482962-23484004
TFDP1	ID3	chr1-23482962-23484004
ELMSAN1	ID3	chr1-23484569-23485284
TFDP1	ID3	chr1-23524592-23525646
EBF3	ID3	chr1-23539443-23540438
ZBTB2	ID3	chr1-23553218-23557174
EBF3	ID3	chr1-23553218-23557174
TFDP1	ID3	chr1-23553218-23557174
ZNF512B	ID3	chr1-23553218-23557174
ELMSAN1	ID3	chr1-23559795-23563442
ZNF417	HMGCL	chr1-23800805-23801884
ZBTB2	HMGCL	chr1-23868295-23869038
ELMSAN1	MYOM3	chr1-23959257-23959811
ZNF280B	MYOM3	chr1-23959257-23959811
NFIB	STPG1	chr1-24438157-24439113
CPEB1	RCAN3	chr1-24413158-24413673
PRDM13	RCAN3	chr1-24451264-24452313
PRDM13	RCAN3	chr1-24501890-24502350
TFAP2B	CLIC4	chr1-24743101-24745356
ZBTB7C	RHD	chr1-25247030-25247308
EBF3	TMEM50A	chr1-25238978-25240887
ELMSAN1	TMEM50A	chr1-25247030-25247308
EBF3	TMEM50A	chr1-25253938-25254352
TFAP2B	MAN1C1	chr1-25517482-25518400
TFAP2B	MAN1C1	chr1-25543104-25543579
TFAP2B	MAN1C1	chr1-25608147-25609156
NFIB	MAN1C1	chr1-25615492-25617467
POU2F2	MAN1C1	chr1-25615492-25617467
ZNF45	MAN1C1	chr1-25615492-25617467
ZNF417	MAN1C1	chr1-25615492-25617467
HMGA2	MAN1C1	chr1-25618338-25619926
ZNF787	MAN1C1	chr1-25618338-25619926
TFAP2B	ZDHHC18	chr1-26785479-26787471
HMGA2	ZDHHC18	chr1-26785479-26787471
NFIA	ZDHHC18	chr1-26788820-26788927
TFAP2B	ZDHHC18	chr1-26825948-26826709
TFAP2B	ZDHHC18	chr1-26832073-26832446
ZNF343	GPATCH3	chr1-26827140-26828085
HMGA2	TRNP1	chr1-26900467-26901354
RARB	TRNP1	chr1-26920972-26921725
HMGA2	TRNP1	chr1-26920972-26921725
TFAP2B	TRNP1	chr1-26996252-26998463
HSF5	WDTC1	chr1-27151764-27153982
ZNF28	WDTC1	chr1-27233601-27234515
MYT1L	STX12	chr1-27684995-27686056
ZNF470	STX12	chr1-27724443-27725978
ZNF665	STX12	chr1-27726162-27726923
TFAP2B	RPA2	chr1-27831367-27831530
TFAP2B	RPA2	chr1-27857803-27859760
TFAP2B	RPA2	chr1-27914747-27915752
PKNOX2	PTAFR	chr1-28087739-28088523
HMGA2	PTAFR	chr1-28088697-28089453
HMGA2	PTAFR	chr1-28234748-28236108
HMGA2	PTAFR	chr1-28246907-28247143
REL	DNAJC8	chr1-28234748-28236108
REL	DNAJC8	chr1-28258782-28259526
SIX5	DNAJC8	chr1-28258782-28259526
ZNF280B	DNAJC8	chr1-28258782-28259526
GATA2	SESN2	chr1-28163431-28164532
NFE2L3	SESN2	chr1-28173443-28174482
ZBTB2	SESN2	chr1-28258782-28259526
PKNOX2	PHACTR4	chr1-28296497-28297429
KLF1	TAF12	chr1-28668840-28670214
ELMSAN1	RAB42	chr1-28517539-28518135
PRDM13	GMEB1	chr1-28580442-28583245
ZBTB2	GMEB1	chr1-28580442-28583245
NFE2L3	GMEB1	chr1-28580442-28583245
ELMSAN1	GMEB1	chr1-28642241-28642654
ELMSAN1	GMEB1	chr1-28648731-28650258
TFDP1	GMEB1	chr1-28667827-28668731
ERF	GMEB1	chr1-28667827-28668731
ELMSAN1	GMEB1	chr1-28668840-28670214
EBF3	OPRD1	chr1-28736004-28736620
SRF	OPRD1	chr1-28737830-28738258
EBF3	OPRD1	chr1-28784900-28785854
REL	OPRD1	chr1-28815288-28817688
EBF3	OPRD1	chr1-28815288-28817688
REL	OPRD1	chr1-28830570-28831524
EBF3	OPRD1	chr1-28860257-28861432
ZNF785	TMEM200B	chr1-29123936-29125988
TFDP1	TMEM200B	chr1-29180872-29181645
EBF3	NKAIN1	chr1-31238114-31239493
ZNF787	SERINC2	chr1-31375993-31376355
ZNF417	SERINC2	chr1-31412089-31413115
TFAP2B	COL16A1	chr1-31634193-31634833
FOSL2	COL16A1	chr1-31644897-31645976
TFDP1	COL16A1	chr1-31644897-31645976
ZNF787	COL16A1	chr1-31644897-31645976
TFAP2B	COL16A1	chr1-31663620-31665171
RARB	SPOCD1	chr1-31694256-31695185
NFIB	SPOCD1	chr1-31694256-31695185
TFAP2B	SPOCD1	chr1-31704320-31707128
ZNF787	SPOCD1	chr1-31704320-31707128
NFIA	SPOCD1	chr1-31714130-31719315
TFAP2B	SPOCD1	chr1-31714130-31719315
HMGA2	SPOCD1	chr1-31714130-31719315
ZNF787	SPOCD1	chr1-31714130-31719315
NFIA	SPOCD1	chr1-31745304-31747114
SRF	SPOCD1	chr1-31769440-31773593
ZNF787	SPOCD1	chr1-31780958-31783929
ZNF512B	SPOCD1	chr1-31780958-31783929
NFIB	SPOCD1	chr1-31786679-31789997
HMGA2	SPOCD1	chr1-31786679-31789997
ZNF787	SPOCD1	chr1-31786679-31789997
NFIB	SPOCD1	chr1-31811015-31812292
PRDM13	KPNA6	chr1-32012410-32013828
ZNF280B	KPNA6	chr1-32012410-32013828
HSF5	KPNA6	chr1-32061910-32064039
PRDM13	KPNA6	chr1-32071246-32072030
ZNF280B	KPNA6	chr1-32071246-32072030
EBF3	CCDC28B	chr1-32198286-32200385
ZNF470	CCDC28B	chr1-32204454-32204597
ELMSAN1	FAM167B	chr1-32178853-32179685
ELMSAN1	FAM167B	chr1-32198286-32200385
TCF7L1	LCK	chr1-32238996-32243229
PRDM5	HDAC1	chr1-32198286-32200385
PRDM13	HDAC1	chr1-32198286-32200385
ELMSAN1	HDAC1	chr1-32198286-32200385
ZNF470	HDAC1	chr1-32204454-32204597
GMEB1	HDAC1	chr1-32205388-32205660
PRDM5	HDAC1	chr1-32208688-32209093
PRDM5	HDAC1	chr1-32222631-32223151
ZNF470	HDAC1	chr1-32222631-32223151
PRDM5	HDAC1	chr1-32238996-32243229
ELMSAN1	HDAC1	chr1-32238996-32243229
NFIA	MARCKSL1	chr1-32238996-32243229
TFAP2B	MARCKSL1	chr1-32238996-32243229
PRDM13	MARCKSL1	chr1-32238996-32243229
NFIA	MARCKSL1	chr1-32291362-32292085
ZNF787	MARCKSL1	chr1-32291362-32292085
TFAP2B	MARCKSL1	chr1-32335098-32335946
PAX3	MARCKSL1	chr1-32336380-32339648
ZNF28	TSSK3	chr1-32251372-32251898
NFIA	TSSK3	chr1-32291362-32292085
NFIX	TSSK3	chr1-32291362-32292085
ZNF225	TSSK3	chr1-32291362-32292085
ZNF225	TSSK3	chr1-32351610-32352711
ELMSAN1	ZBTB8B	chr1-32426476-32427677
MITF	ZBTB8B	chr1-32447899-32449006
ELMSAN1	ZBTB8B	chr1-32463888-32465056
TFDP1	KIAA1522	chr1-32741040-32741884
CPEB1	KIAA1522	chr1-32753239-32754018
TBX20	KIAA1522	chr1-32754181-32755671
POU2F2	YARS	chr1-32701570-32702607
REL	YARS	chr1-32741040-32741884
HMGA2	YARS	chr1-32741040-32741884
HMGA2	YARS	chr1-32753239-32754018
REL	YARS	chr1-32754181-32755671
EBF3	YARS	chr1-32754181-32755671
TCF7L1	YARS	chr1-32772442-32772864
EBF3	YARS	chr1-32818154-32818524
EBF3	YARS	chr1-32869439-32870652
ELMSAN1	FNDC5	chr1-32816579-32816766
ZNF665	FNDC5	chr1-32818154-32818524
ELMSAN1	FNDC5	chr1-32869439-32870652
ZNF665	FNDC5	chr1-32869439-32870652
GMEB1	FNDC5	chr1-32880817-32883058
ELMSAN1	FNDC5	chr1-32883710-32885993
ZBTB2	RNF19B	chr1-32869439-32870652
ZBTB2	RNF19B	chr1-32883710-32885993
EBF2	PHC2	chr1-33255012-33256544
MAEL	PHC2	chr1-33256655-33258511
MYT1L	PHC2	chr1-33256655-33258511
TFDP1	PHC2	chr1-33346811-33349596
ZNF665	ZSCAN20	chr1-33429852-33430975
ZNF785	ZSCAN20	chr1-33431053-33431872
ZNF785	ZSCAN20	chr1-33471802-33472644
TFAP2B	CSMD2	chr1-33426636-33427584
NFIB	CSMD2	chr1-33426636-33427584
ELMSAN1	CSMD2	chr1-33426636-33427584
POU2F2	CSMD2	chr1-33426636-33427584
TFAP2B	CSMD2	chr1-33429852-33430975
HMGA2	CSMD2	chr1-33429852-33430975
TCF7L1	CSMD2	chr1-33431053-33431872
ZNF787	CSMD2	chr1-33431053-33431872
TFAP2B	CSMD2	chr1-33436445-33437555
ELMSAN1	CSMD2	chr1-33455504-33456454
ZNF787	CSMD2	chr1-33455504-33456454
TCF7L1	CSMD2	chr1-33471802-33472644
TFAP2B	CSMD2	chr1-33471802-33472644
POU2F2	CSMD2	chr1-33471802-33472644
NFIB	CSMD2	chr1-33612565-33613520
HMGA2	CSMD2	chr1-33632826-33633421
ELMSAN1	CSMD2	chr1-33877993-33878916
NFIB	CSMD2	chr1-34013749-34014816
REL	DLGAP3	chr1-34866302-34867047
REL	DLGAP3	chr1-34906490-34907354
REL	DLGAP3	chr1-34929586-34930962
EBF3	DLGAP3	chr1-34929586-34930962
PRDM5	TFAP2E	chr1-35544762-35545708
ZNF343	TFAP2E	chr1-35556758-35557047
ZNF343	TFAP2E	chr1-35574410-35574948
GMEB1	CLSPN	chr1-35706887-35710182
PRDM13	CLSPN	chr1-35706887-35710182
MYT1L	CLSPN	chr1-35768419-35769846
PRDM13	CLSPN	chr1-35768419-35769846
EBF3	COL8A2	chr1-36086042-36086703
EBF3	COL8A2	chr1-36099488-36100049
EBF3	COL8A2	chr1-36149515-36152170
ELMSAN1	SH3D21	chr1-36305712-36306386
TFAP2B	OSCP1	chr1-36321779-36322030
ELMSAN1	OSCP1	chr1-36366073-36366939
MITF	OSCP1	chr1-36384442-36385722
TFAP2B	OSCP1	chr1-36384442-36385722
ELMSAN1	OSCP1	chr1-36385897-36388082
ZNF417	OSCP1	chr1-36385897-36388082
ELMSAN1	OSCP1	chr1-36396741-36397617
ELMSAN1	OSCP1	chr1-36450452-36451410
EBF2	GRIK3	chr1-36720685-36721605
EBF3	SNIP1	chr1-37474630-37475317
EBF3	SNIP1	chr1-37556447-37556918
MYT1L	SNIP1	chr1-37595936-37596656
HMGA2	RSPO1	chr1-37554303-37554768
GATA2	RSPO1	chr1-37630388-37631686
NFIB	RSPO1	chr1-37660257-37661956
REL	RSPO1	chr1-37663200-37664224
GATA2	RSPO1	chr1-37690521-37691047
NFIB	RSPO1	chr1-37691582-37692025
ZNF665	C1orf109	chr1-37595291-37595758
ZNF512B	C1orf109	chr1-37595936-37596656
ZNF665	C1orf109	chr1-37689887-37690001
ZNF665	CDCA8	chr1-37595291-37595758
GMEB1	CDCA8	chr1-37595936-37596656
NFIB	CDCA8	chr1-37660257-37661956
ZNF665	CDCA8	chr1-37689887-37690001
NFIB	CDCA8	chr1-37691582-37692025
EBF3	MANEAL	chr1-37725841-37727101
TBX20	MANEAL	chr1-37753227-37754214
EBF3	MANEAL	chr1-37753227-37754214
ZNF225	MANEAL	chr1-37763950-37764960
GMEB1	MANEAL	chr1-37793236-37793801
ZNF28	INPP5B	chr1-37793236-37793801
ZNF665	INPP5B	chr1-37793236-37793801
ZNF28	INPP5B	chr1-37808733-37808977
KLF1	INPP5B	chr1-37858851-37859530
ZNF28	INPP5B	chr1-37859621-37860696
ZNF665	INPP5B	chr1-37989651-37989869
NFKB2	INPP5B	chr1-38011894-38012713
MYT1L	INPP5B	chr1-38012866-38013945
GATA2	RRAGC	chr1-38783077-38786537
NFE2L3	RRAGC	chr1-38783077-38786537
GATA2	RRAGC	chr1-38859824-38860806
NFE2L3	RRAGC	chr1-38859824-38860806
CPEB1	RHBDL2	chr1-38822225-38823294
ZNF512B	RHBDL2	chr1-38858732-38859409
CPEB1	RHBDL2	chr1-38859824-38860806
ZNF343	RHBDL2	chr1-38872631-38873017
ZNF417	RHBDL2	chr1-38990209-38991222
ZNF512B	RHBDL2	chr1-38990209-38991222
CPEB1	RHBDL2	chr1-38991601-38992544
ELMSAN1	NDUFS5	chr1-39026403-39027383
SRF	MACF1	chr1-38991601-38992544
REL	MACF1	chr1-39170279-39171654
ZBTB7C	HEYL	chr1-39558994-39560093
ZBTB2	HEYL	chr1-39609386-39610453
ZBTB7C	HEYL	chr1-39639946-39640698
ZBTB7C	HEYL	chr1-39689180-39691064
ZNF470	TRIT1	chr1-39753717-39754106
CREB3	TRIT1	chr1-39816412-39817396
ZNF470	TRIT1	chr1-39816412-39817396
ZNF512B	TRIT1	chr1-39902014-39902140
ZNF343	CAP1	chr1-40039240-40040232
ZNF787	TMCO2	chr1-40160644-40161372
ELMSAN1	TMCO2	chr1-40161637-40162335
ZNF417	TMCO2	chr1-40161637-40162335
CPEB1	ZMPSTE24	chr1-40160644-40161372
MAEL	COL9A2	chr1-40257266-40258106
ELMSAN1	COL9A2	chr1-40257266-40258106
ELMSAN1	COL9A2	chr1-40307990-40308191
ELMSAN1	COL9A2	chr1-40373074-40373696
ZNF343	CITED4	chr1-40862367-40863214
ZNF512B	CITED4	chr1-40862367-40863214
ZNF512B	CITED4	chr1-40883916-40884901
ZNF45	CTPS1	chr1-40978770-40979334
[truncated: 19,170 more rows]

## Sheet: RGC GRN
tf	target	region
[truncated: 217,060+ more rows]

[truncated: 1 more sheets: HC GRN]
