# Supplementary material for: Single Cell Multiome Atlas of the Human Developing Retina
Source: Research Square preprint supplement (doi:10.21203/rs.3.rs-3417373/v1), 2023-10-11
Supplement: Supplementary file 9 [file d8f838d4c25812163ca427cc.xlsx]

## Sheet: RGC Fetal Peaks Mapped to Adult
Ontology	# Term Name	Binom Rank	Binom Raw P-Value	Binom FDR Q-Val	Binom Fold Enrichment	Binom Observed Region Hits	Binom Region Set Coverage	Hyper Rank	Hyper FDR Q-Val	Hyper Fold Enrichment	Hyper Observed Gene Hits	Hyper Total Genes	Hyper Gene Set Coverage
GO Biological Process	innervation	25	4.50059e-11	2.36893e-8	3.3351	42	1.92%	179	6.69348e-5	4.0443	14	25	0.54%
	nerve development	35	2.04904e-9	7.70382e-7	2.3441	62	2.83%	262	1.36897e-3	2.3743	24	73	0.92%
	peptidyl-serine dephosphorylation	49	1.21472e-8	3.26213e-6	6.8526	15	0.68%	610	4.25151e-2	4.5137	5	8	0.19%
	neuron fate specification	59	5.76323e-8	1.28540e-5	2.5908	42	1.92%	405	8.24064e-3	2.8450	13	33	0.50%
	dendrite morphogenesis	138	3.66385e-6	3.49366e-4	2.1521	44	2.01%	189	1.03468e-4	2.9737	21	51	0.81%
	regulation of neuron maturation	157	8.07338e-6	6.76673e-4	4.3085	14	0.64%	435	1.22226e-2	4.8146	6	9	0.23%
	regulation of cell maturation	160	9.22883e-6	7.59014e-4	3.6057	17	0.78%	540	2.73298e-2	3.0951	9	21	0.35%
	neurotrophin signaling pathway	327	1.94325e-4	7.81993e-3	2.5462	20	0.91%	459	1.48590e-2	3.1400	10	23	0.38%
	metanephric nephron development	335	2.14528e-4	8.42679e-3	2.0776	30	1.37%	530	2.52364e-2	2.6262	12	33	0.46%
	cell migration in hindbrain	345	2.28237e-4	8.70541e-3	2.7617	17	0.78%	553	3.23281e-2	3.6110	7	14	0.27%
	blastoderm segmentation	351	2.34897e-4	8.80629e-3	2.6623	18	0.82%	579	3.63492e-2	3.2097	8	18	0.31%
	phosphatidic acid biosynthetic process	359	2.58559e-4	9.47739e-3	2.4894	20	0.91%	621	4.41445e-2	2.3471	13	40	0.50%
	glycosphingolipid biosynthetic process	388	3.51142e-4	1.19090e-2	2.3688	21	0.96%	302	2.46707e-3	3.6110	11	22	0.42%
	retinal ganglion cell axon guidance	401	3.82305e-4	1.25455e-2	2.0622	28	1.28%	446	1.34980e-2	3.4209	9	19	0.35%
	regulation of axon guidance	409	4.09096e-4	1.31621e-2	2.1187	26	1.19%	209	2.65264e-4	4.1268	12	21	0.46%
	response to nicotine	437	5.22325e-4	1.57283e-2	2.1571	24	1.10%	477	1.73404e-2	2.3582	16	49	0.62%
	microspike assembly	542	1.28814e-3	3.12742e-2	6.3778	5	0.23%	426	1.13328e-2	7.2219	4	4	0.15%
	sialylation	567	1.63121e-3	3.78574e-2	2.3032	17	0.78%	270	1.57707e-3	3.7829	11	21	0.42%
	positive regulation of developmental pigmentation	611	2.04204e-3	4.39791e-2	2.7174	12	0.55%	435	1.22226e-2	4.8146	6	9	0.23%
The test set of 2,191 genomic regions picked 2,600 genes (14%) of all 18,777 genes.
GO Biological Process has 13,159 terms covering 16,804 (89%) of all 18,777 genes.	13,159 ontology terms were tested (100%) using an annotation count range of [1, 1000].
GREAT version 4.0.4
Species assembly: hg38
Association rule: Basal+extension: 5000 bp upstream, 1000 bp downstream, 1000000 bp max extension, curated regulatory domains included
chr	start	end
chr8	30552289	30552789
chr17	66831660	66832160
chr2	207310214	207310714
chr20	5166789	5167289
chr10	114874835	114875335
chr14	30356788	30357288
chr8	30575902	30576402
chr5	140151829	140152329
chr11	102630747	102631247
chr4	146637802	146638302
chr8	24913413	24913913
chr10	79396511	79397011
chr22	31933783	31934283
chr17	3596996	3597496
chr4	21710128	21710628
chr9	98142677	98143177
chr3	37219206	37219706
chr8	24956420	24956920
chr1	6276320	6276820
chr4	139593157	139593657
chr12	49293304	49293804
chr16	66459777	66460277
chr4	95255672	95256172
chr8	30320475	30320975
chr16	22681577	22682077
chr16	23052300	23052800
chr16	66457815	66458315
chr14	96030157	96030657
chr1	110239333	110239833
chr1	230352452	230352952
chr4	66565097	66565597
chr12	88390398	88390898
chr22	41781019	41781519
chr3	120281184	120281684
chr3	115761427	115761927
chr3	177934414	177934914
chr5	36772653	36773153
chr7	139494988	139495488
chr13	78306967	78307467
chr11	106399096	106399596
chr20	64090172	64090672
chr1	209608938	209609438
chr19	4015108	4015608
chr22	41531600	41532100
chr13	29354970	29355470
chr5	51039282	51039782
chr15	73868945	73869445
chr9	93004035	93004535
chr3	193767992	193768492
chr5	151864286	151864786
chr16	29288671	29289171
chr2	98875294	98875794
chr11	45880371	45880871
chr12	130151741	130152241
chr4	114867180	114867680
chr2	207266573	207267073
chr7	4684785	4685285
chr15	74259235	74259735
chr14	74840436	74840936
chr7	1900991	1901491
chr12	108801946	108802446
chr6	43113605	43114105
chr8	73357007	73357507
chr13	31074100	31074600
chr7	142567511	142568011
chr1	62247709	62248209
chr5	67287803	67288303
chr6	1037752	1038252
chr18	63143200	63143700
chr7	5294467	5294967
chr2	151024678	151025178
chr2	38498032	38498532
chr15	77528780	77529280
chr21	41868179	41868679
chr4	15341035	15341535
chr17	30259447	30259947
chr12	62693594	62694094
chr15	84835564	84836064
chr16	54062540	54063040
chr17	66831029	66831529
chr6	6008715	6009215
chr13	78562153	78562653
chr3	149678280	149678780
chr7	44762154	44762654
chr4	3251121	3251621
chr5	68744133	68744633
chr19	17762414	17762914
chr15	43920785	43921285
chr4	53538449	53538949
chr8	61874108	61874608
chr9	138043732	138044232
chr6	33733488	33733988
chr2	10843987	10844487
chr9	94741669	94742169
chr4	40904591	40905091
chr5	3386129	3386629
chr2	101613020	101613520
chr1	59232115	59232615
chr5	31630820	31631320
chr7	78001915	78002415
chr7	151538934	151539434
chr12	67112576	67113076
chr1	11292555	11293055
chr13	94851472	94851972
chr4	102731112	102731612
chr9	100066479	100066979
chr1	59141455	59141955
chr4	25014874	25015374
chr10	36679391	36679891
chr1	183330997	183331497
chr22	36814766	36815266
chr11	115745524	115746024
chr7	76289972	76290472
chr4	95318468	95318968
chr1	30059955	30060455
chr20	56513411	56513911
chr15	37038708	37039208
chr2	1968044	1968544
chr12	49233763	49234263
chr15	70535139	70535639
chr16	87407678	87408178
chr5	171080286	171080786
chr20	46971235	46971735
chr7	156210589	156211089
chr7	5262951	5263451
chr15	85899861	85900361
chr11	31932900	31933400
chr6	99309485	99309985
chr11	132714777	132715277
chr14	88900785	88901285
chr16	64865147	64865647
chr17	76973078	76973578
chr3	154571488	154571988
chr6	111850218	111850718
chr17	80678583	80679083
chr10	15250931	15251431
chr14	39491297	39491797
chr3	59373523	59374023
chr3	115760645	115761145
chr3	64489280	64489780
chr17	45299359	45299859
chr18	908913	909413
chr7	1902106	1902606
chr11	79881999	79882499
chr20	63551111	63551611
chr16	64419718	64420218
chr12	57372095	57372595
chr3	40021282	40021782
chr5	133825545	133826045
chr2	222381522	222382022
chr5	14817345	14817845
chr14	64202048	64202548
chr13	102310837	102311337
chr15	84914861	84915361
chr9	94740391	94740891
chr8	55193768	55194268
chr12	107668596	107669096
chr4	184643063	184643563
chr11	42812330	42812830
chr10	76954136	76954636
chr11	132822225	132822725
chr2	149483099	149483599
chr21	31911015	31911515
chr16	56197027	56197527
chr2	221948012	221948512
chr9	137169204	137169704
chr1	165434265	165434765
chr12	49294825	49295325
chr16	69893033	69893533
chr1	154329577	154330077
chr6	24959257	24959757
chr10	129964063	129964563
chr12	46210942	46211442
chr18	34867463	34867963
chr5	73813143	73813643
chr10	76939819	76940319
chr18	27825628	27826128
chr8	91046578	91047078
chr10	57864208	57864708
chr15	38684370	38684870
chr2	166375847	166376347
chr4	152999272	152999772
chr19	31420174	31420674
chr9	135655106	135655606
chr11	22340480	22340980
chr12	29244237	29244737
chr20	37868688	37869188
chr16	88262713	88263213
chr20	43928337	43928837
chr5	179209453	179209953
chr13	29508732	29509232
chr2	122960879	122961379
chr7	45073350	45073850
chr10	48590872	48591372
chr3	20065059	20065559
chr2	16584036	16584536
chr22	25964849	25965349
chr19	33412539	33413039
chr2	44618355	44618855
chr8	32963205	32963705
chr2	229518147	229518647
chr4	14254860	14255360
chr20	17014750	17015250
chr7	19145138	19145638
chr18	24138737	24139237
chr12	49294312	49294812
chr3	157066842	157067342
chr4	15341550	15342050
chr11	79241424	79241924
chr2	3654458	3654958
chr4	57235911	57236411
chr2	150963193	150963693
chr2	209663089	209663589
chr3	38987914	38988414
chr12	66965532	66966032
chr6	6006756	6007256
chr22	44592751	44593251
chr8	14461293	14461793
chr8	31245165	31245665
chr6	5827366	5827866
chr13	43397181	43397681
chr11	115075380	115075880
chr11	8658341	8658841
chr11	35331361	35331861
chr15	52727881	52728381
chr6	82144449	82144949
chr1	41713850	41714350
chr1	41006524	41007024
chr8	21838545	21839045
chr9	128642786	128643286
chr10	94988812	94989312
chr5	51961048	51961548
chr9	124605856	124606356
chr2	205902346	205902846
chr7	137894986	137895486
chr14	49258156	49258656
chr11	62707257	62707757
chr6	112297988	112298488
chr15	74258574	74259074
chr15	77810171	77810671
chr12	53678699	53679199
chr5	915931	916431
chr4	153018707	153019207
chr22	44267994	44268494
chr18	42271995	42272495
chr2	227579790	227580290
chr9	78468260	78468760
chr6	151239484	151239984
chr12	66947786	66948286
chr16	65936162	65936662
chr7	43379269	43379769
chr8	72864311	72864811
chr2	200747836	200748336
chr3	50484715	50485215
chr10	130215133	130215633
chr8	101051572	101052072
chr17	64155035	64155535
chr13	110021007	110021507
chr1	92346812	92347312
chr14	55515070	55515570
chr5	122584886	122585386
chr14	55761637	55762137
chr2	205959600	205960100
chr14	105294169	105294669
chr9	93126726	93127226
chr11	24238917	24239417
chr1	14539882	14540382
chr1	245810758	245811258
chr17	1847153	1847653
chr6	4287427	4287927
chr1	204456975	204457475
chr11	125922167	125922667
chr18	34048349	34048849
chr1	165411321	165411821
chr11	19805381	19805881
chr16	82886527	82887027
chr7	39249662	39250162
chr5	109630047	109630547
chr17	6027270	6027770
chr15	83323347	83323847
chr18	41967815	41968315
chr5	139023264	139023764
chr6	86456824	86457324
chr4	36256566	36257066
chr4	184343804	184344304
chr16	63241502	63242002
chr10	20922311	20922811
chr14	89248358	89248858
chr4	182494920	182495420
chr11	19652887	19653387
chr8	106206200	106206700
chr10	75018184	75018684
chr13	39536776	39537276
chr16	12236537	12237037
chr1	81607825	81608325
chr12	108204325	108204825
chr16	15519048	15519548
chr14	95261616	95262116
chr9	90326246	90326746
chr21	45596292	45596792
chr13	38635459	38635959
chr19	10782661	10783161
chr10	3486282	3486782
chr11	92662598	92663098
chr18	42310939	42311439
chr9	85246486	85246986
chr4	6696663	6697163
chr15	88142086	88142586
chr17	6323550	6324050
chr13	70108252	70108752
chr9	115213885	115214385
chr11	78939042	78939542
chr2	1463014	1463514
chr8	24534752	24535252
chr13	79004484	79004984
chr4	143288170	143288670
chr14	45947396	45947896
chr8	24955023	24955523
chr8	138608750	138609250
chr10	118507150	118507650
chr19	33724320	33724820
chr11	44946099	44946599
chr2	190787694	190788194
chr1	165422994	165423494
chr1	222265839	222266339
chr1	9149670	9150170
chr2	54397384	54397884
chr8	100887851	100888351
chr7	55054036	55054536
chr15	47877808	47878308
chr1	90263110	90263610
chr10	33125779	33126279
chr2	207225046	207225546
chr14	103311540	103312040
chr3	131114267	131114767
chr2	79906501	79907001
chr18	45423789	45424289
chr3	32555028	32555528
chr11	120928647	120929147
chr2	184425027	184425527
chr4	159213194	159213694
chr5	170046248	170046748
chr16	84789252	84789752
chr11	36314506	36315006
chr12	112782907	112783407
chr22	25070017	25070517
chr2	106339040	106339540
chr16	85390657	85391157
chr20	48677040	48677540
chr5	172355026	172355526
chr14	39857401	39857901
chr10	112052100	112052600
chr11	13163107	13163607
chr12	112714168	112714668
chr8	129997492	129997992
chr12	107586312	107586812
chr5	3386641	3387141
chr2	233475535	233476035
chr5	136042737	136043237
chr12	107981535	107982035
chr6	131496307	131496807
chr20	46195608	46196108
chr1	211185110	211185610
chr16	12868088	12868588
chr8	30543264	30543764
chr1	66354274	66354774
chr12	107870113	107870613
chr9	83560105	83560605
chr6	12913031	12913531
chr11	45157113	45157613
chr6	35810834	35811334
chr18	923956	924456
chr7	101165389	101165889
chr14	74733188	74733688
chr11	22798864	22799364
chr2	234098682	234099182
chr16	25049437	25049937
chr5	157944152	157944652
chr1	90387188	90387688
chr10	11027647	11028147
chr3	183576448	183576948
chr17	80925771	80926271
chr4	25088275	25088775
chr22	20887308	20887808
chr7	45600208	45600708
chr4	93567501	93568001
chr5	65151586	65152086
chr10	123606141	123606641
chr15	29435649	29436149
chr4	6365429	6365929
chr5	76216689	76217189
chr9	68689984	68690484
chr11	92457997	92458497
chr6	64404468	64404968
chr1	177341709	177342209
chr13	31124070	31124570
chr1	103917717	103918217
chr2	286958	287458
chr8	41092597	41093097
chr6	5997213	5997713
chr17	66858224	66858724
chr15	88141305	88141805
chr7	5266067	5266567
chr6	157228753	157229253
chr1	202689746	202690246
chr16	23867747	23868247
chr17	80491734	80492234
chr12	130074997	130075497
chr16	23064445	23064945
chr8	79612520	79613020
chr2	169415316	169415816
chr5	96432985	96433485
chr10	29370689	29371189
chr6	118718252	118718752
chr1	86247599	86248099
chr2	145753166	145753666
chr5	178107957	178108457
chr3	115239676	115240176
chr4	114998221	114998721
chr12	129003899	129004399
chr10	129230675	129231175
chr2	6863826	6864326
chr6	12849274	12849774
chr8	91095715	91096215
chr9	98165372	98165872
chr10	114479321	114479821
chr11	6351861	6352361
chr3	56775488	56775988
chr8	128330935	128331435
chr18	10065254	10065754
chr3	17057377	17057877
chr15	76245055	76245555
chr5	146753371	146753871
chr22	38223606	38224106
chr22	46726365	46726865
chr8	42471028	42471528
chr2	101976025	101976525
chr5	141769339	141769839
chr2	100976965	100977465
chr16	9340716	9341216
chr9	107218040	107218540
chr10	128001784	128002284
chr20	15835795	15836295
chr1	202569555	202570055
chr1	210516212	210516712
chr11	96335330	96335830
chr15	67134237	67134737
chr11	78704953	78705453
chr15	69908403	69908903
chr2	9140586	9141086
chr3	155386970	155387470
chr12	69173348	69173848
chr7	127995130	127995630
chr2	115248006	115248506
chr12	47417837	47418337
chr1	165439206	165439706
chr7	111113176	111113676
chr1	94060862	94061362
chr8	333080	333580
chr11	135004437	135004937
chr10	18703483	18703983
chr7	101676207	101676707
chr10	3424441	3424941
chr1	220337373	220337873
chr8	100886078	100886578
chr1	245760275	245760775
chr7	45088821	45089321
chr2	235729456	235729956
chr1	241208919	241209419
chr4	36843811	36844311
chr11	100275665	100276165
chr10	80498792	80499292
chr16	7505246	7505746
chr11	93488220	93488720
chr1	11346057	11346557
chr4	21578377	21578877
chr9	129126668	129127168
chr11	57463681	57464181
chr11	114130238	114130738
chr10	78375767	78376267
chr4	113007087	113007587
chr4	84393146	84393646
chr7	76220604	76221104
chr7	37230173	37230673
chr3	96193047	96193547
chr2	134506415	134506915
chr2	190786253	190786753
chr7	145174568	145175068
chr2	2638314	2638814
chr1	154328422	154328922
chr3	108930801	108931301
chr18	56483293	56483793
chr4	48321228	48321728
chr22	32332475	32332975
chr13	48660574	48661074
chr2	283133	283633
chr12	552391	552891
chr14	22668271	22668771
chr13	101814440	101814940
chr11	17846848	17847348
chr20	17867134	17867634
chr12	40263857	40264357
chr10	130409193	130409693
chr10	79243108	79243608
chr7	29894307	29894807
chr2	60023604	60024104
chr9	101194939	101195439
chr12	49292662	49293162
chr3	71846064	71846564
chr3	139814553	139815053
chr7	70446422	70446922
chr6	166757692	166758192
chr3	135506090	135506590
chr12	108005102	108005602
chr9	26669570	26670070
chr5	91118385	91118885
chr10	3237010	3237510
chr22	38602193	38602693
chr5	148569999	148570499
chr11	70501055	70501555
chr17	5665140	5665640
chr11	8035522	8036022
chr3	10708556	10709056
chr1	19988137	19988637
chr10	7551111	7551611
chr2	145194685	145195185
chr20	59678209	59678709
chr21	29958462	29958962
chr22	33745397	33745897
chr5	16169462	16169962
chr7	36032250	36032750
chr9	97518849	97519349
chr8	134457161	134457661
chr8	25907714	25908214
chr3	176896573	176897073
chr11	83472148	83472648
chr18	50706304	50706804
chr19	28586446	28586946
chr20	32270434	32270934
chr5	158977989	158978489
chr6	157108210	157108710
chr7	133155192	133155692
chr18	64245038	64245538
chr2	23900462	23900962
chr7	108227413	108227913
chr11	15309788	15310288
chr17	2360992	2361492
chr20	38441871	38442371
chr8	140597658	140598158
chr8	71279725	71280225
chr19	19485101	19485601
chr11	122681840	122682340
chr22	50224059	50224559
chr3	27910177	27910677
chr15	61643524	61644024
chr22	33773224	33773724
chr20	52918891	52919391
chr16	49661410	49661910
chr12	44101461	44101961
chr1	220818684	220819184
chr10	33746707	33747207
chr4	4386183	4386683
chr7	85093634	85094134
chr1	173024570	173025070
chr15	94441726	94442226
chr5	163874187	163874687
chr14	32329029	32329529
chr2	100202756	100203256
chr7	76193810	76194310
chr6	155273363	155273863
chr15	89090651	89091151
chr5	146761725	146762225
chr13	43769296	43769796
chr1	168696335	168696835
chr11	28674327	28674827
chr2	149098584	149099084
chr9	95105621	95106121
chr14	71070154	71070654
chr6	50591206	50591706
chr17	61219442	61219942
chr10	92267272	92267772
chr13	78296360	78296860
chr14	99773427	99773927
chr17	69223607	69224107
chr3	9681820	9682320
chr8	114940994	114941494
chr2	174810325	174810825
chr7	36084368	36084868
chr1	63893028	63893528
chr1	160112337	160112837
chr6	71130221	71130721
chr1	42429512	42430012
chr18	24797865	24798365
chr9	119751898	119752398
chr11	64675349	64675849
chr5	51747979	51748479
chr18	49934353	49934853
chr9	115202989	115203489
chr12	13941460	13941960
chr1	92101045	92101545
chr5	112283025	112283525
chr5	148697052	148697552
chr1	179761195	179761695
chr19	18646895	18647395
chr6	139407822	139408322
chr11	14540099	14540599
chr2	16125544	16126044
chr22	33334519	33335019
chr6	76916834	76917334
chr3	191523220	191523720
chr8	71308666	71309166
chr10	86654305	86654805
chr3	126850515	126851015
chr1	236837303	236837803
chr5	50441139	50441639
chr2	201153070	201153570
chr16	26950562	26951062
chr10	44898634	44899134
chr2	148932495	148932995
chr12	93852026	93852526
chr6	35077228	35077728
chr8	29062253	29062753
chr6	142899083	142899583
chr19	28929461	28929961
chr8	53585516	53586016
chr6	153758463	153758963
chr8	31244417	31244917
chr7	2040780	2041280
chr13	67044353	67044853
chr9	113541137	113541637
chr11	109300145	109300645
chr7	25807607	25808107
chr17	79607590	79608090
chr4	71204055	71204555
chr16	74468815	74469315
chr14	100428711	100429211
chr5	17273723	17274223
chr11	36313657	36314157
chr1	21384614	21385114
chr8	114992671	114993171
chr16	27786184	27786684
chr10	79009417	79009917
chr7	117717978	117718478
chr2	33103435	33103935
chr16	79372332	79372832
chr1	110292349	110292849
chr1	20340015	20340515
chr1	31218592	31219092
chr11	75301443	75301943
chr8	51239920	51240420
chr4	146647977	146648477
chr2	205901480	205901980
chr16	20200059	20200559
chr10	86960326	86960826
chr10	409347	409847
chr8	132516395	132516895
chr11	102498954	102499454
chr13	44636402	44636902
chr2	44037135	44037635
chr20	12594677	12595177
chr3	10635867	10636367
chr6	50561800	50562300
chr8	24652104	24652604
chr2	177868763	177869263
chr3	17047797	17048297
chr10	79194695	79195195
chr8	140262462	140262962
chr9	70979834	70980334
chr1	46557999	46558499
chr17	44760709	44761209
chr22	34803975	34804475
chr21	16363002	16363502
chr20	48919458	48919958
chr9	79651324	79651824
chr5	73418150	73418650
chr13	33634574	33635074
chr20	37749957	37750457
chr8	141551849	141552349
chr2	6927142	6927642
chr14	37315060	37315560
chr2	100267716	100268216
chr4	14102311	14102811
chr11	43923713	43924213
chr16	58429054	58429554
chr12	82838768	82839268
chr4	170109538	170110038
chr1	68323337	68323837
chr19	56712554	56713054
chr5	158484964	158485464
chr3	10366454	10366954
chr4	102675080	102675580
chr5	11426336	11426836
chr5	169707704	169708204
chr2	9356289	9356789
chr5	147169249	147169749
chr2	219831226	219831726
chr6	116557759	116558259
chr9	90419223	90419723
chr12	3073835	3074335
chr15	98253293	98253793
chr4	6453376	6453876
chr8	40932848	40933348
chr11	47329574	47330074
chr10	359045	359545
chr8	98423907	98424407
chr13	65856411	65856911
chr5	76084438	76084938
chr11	17403908	17404408
chr6	5772037	5772537
chr3	135136605	135137105
chr18	23200601	23201101
chr2	223972542	223973042
chr1	109624717	109625217
chr19	40603787	40604287
chr1	18989896	18990396
chr2	227423519	227424019
chr10	127275933	127276433
chr13	72199158	72199658
chr5	3595501	3596001
chr3	166330662	166331162
chr1	15592239	15592739
chr16	21556485	21556985
chr7	149070483	149070983
chr6	6543342	6543842
chr12	128312625	128313125
chr2	134602255	134602755
chr8	30638298	30638798
chr3	58158549	58159049
chr7	102129993	102130493
chr9	18526546	18527046
chr18	58928332	58928832
chr6	34043244	34043744
chr10	106694692	106695192
chr12	121511818	121512318
chr18	58041118	58041618
chr16	67443860	67444360
chr4	9911187	9911687
chr10	5896583	5897083
chr11	75311940	75312440
chr12	98296265	98296765
chr3	3269850	3270350
chr3	196199000	196199500
chr9	23620956	23621456
chr2	16040496	16040996
chr3	9720936	9721436
chr8	36534796	36535296
chr11	22466744	22467244
chr21	41024637	41025137
chr1	7517857	7518357
chr20	20207211	20207711
chr2	174807328	174807828
chr3	127142091	127142591
chr12	93838149	93838649
chr9	134205914	134206414
chr17	76444610	76445110
chr2	44038164	44038664
chr14	96030713	96031213
chr14	23579165	23579665
chr1	245694636	245695136
chr18	25960625	25961125
chr13	112842932	112843432
chr20	61840255	61840755
chr16	47947691	47948191
chr2	6632078	6632578
chr5	73316950	73317450
chr2	145488519	145489019
chr10	29370124	29370624
chr11	32298107	32298607
chr2	191321710	191322210
chr3	18045657	18046157
chr3	195147821	195148321
chr1	210664147	210664647
chr18	46711286	46711786
chr6	37003977	37004477
chr7	68726377	68726877
chr1	48630960	48631460
chr6	148990470	148990970
chr4	159583424	159583924
chr15	78312256	78312756
chr18	48713489	48713989
chr3	85835965	85836465
chr11	131972935	131973435
chr22	40720913	40721413
chr8	141904664	141905164
chr7	80053016	80053516
chr14	82250322	82250822
chr5	136676581	136677081
chr10	126041792	126042292
chr13	103656263	103656763
chr2	222319944	222320444
chr7	6294888	6295388
chr1	6065048	6065548
chr1	44261021	44261521
chr7	152090606	152091106
chr3	20406549	20407049
chr1	59143750	59144250
chr7	131276692	131277192
chr8	119877287	119877787
chr5	153551387	153551887
chr1	166119392	166119892
chr12	118537523	118538023
chr1	179728139	179728639
chr2	119004909	119005409
chr6	79602796	79603296
chr15	41538797	41539297
chr16	15502335	15502835
chr12	112676494	112676994
chr12	29149570	29150070
chr5	96487703	96488203
chr15	33810739	33811239
chr8	97420502	97421002
chr8	61453381	61453881
chr18	34968555	34969055
chr10	21026496	21026996
chr4	159248638	159249138
chr5	92378961	92379461
chr22	31857228	31857728
chr15	33031431	33031931
chr5	53825223	53825723
chr1	236687147	236687647
chr14	49294580	49295080
chr18	45130428	45130928
chr18	46712418	46712918
chr2	16954390	16954890
chr2	150768161	150768661
chr5	103355487	103355987
chr17	31515197	31515697
chr15	52038110	52038610
chr2	199206486	199206986
chr7	104255136	104255636
chr10	71079856	71080356
chr15	53402181	53402681
chr5	133450879	133451379
chr16	23823766	23824266
chr11	134776446	134776946
chr3	131218201	131218701
chr13	62551251	62551751
chr5	132394620	132395120
chr4	43102900	43103400
chr20	41248194	41248694
chr9	98380831	98381331
chr1	47023456	47023956
chr5	29950395	29950895
chr1	222310791	222311291
chr9	114551871	114552371
chr9	130860741	130861241
chr1	205042907	205043407
chr18	6580333	6580833
chr9	16371256	16371756
chr12	98930843	98931343
chr7	70347798	70348298
chr5	102920682	102921182
chr1	168328705	168329205
chr17	34815806	34816306
chr17	74677776	74678276
chr17	1797295	1797795
chr3	32755794	32756294
chr12	57632453	57632953
chr4	146637206	146637706
chr12	45429739	45430239
chr6	157386423	157386923
chr14	64114046	64114546
chr6	6007339	6007839
chr4	98568783	98569283
chr6	40337225	40337725
chr2	207219387	207219887
chr8	60849708	60850208
chr1	37149275	37149775
chr10	129197751	129198251
chr20	22928030	22928530
chr5	15576934	15577434
chr2	44009262	44009762
chr17	1190622	1191122
chr3	3848810	3849310
chr12	5059265	5059765
chr9	133492157	133492657
chr8	141922050	141922550
chr9	94932975	94933475
chr5	101284954	101285454
chr2	95062562	95063062
chr10	129951204	129951704
chr4	120313584	120314084
chr8	68022164	68022664
chr7	49623916	49624416
chr4	101201431	101201931
chr2	42840146	42840646
chr3	134985724	134986224
chr2	52236046	52236546
chr4	43199668	43200168
chr3	15023742	15024242
chr3	38837277	38837777
chr15	90660418	90660918
chr9	71184806	71185306
chr1	4915877	4916377
chr2	129478944	129479444
chr3	151002011	151002511
chr4	18619787	18620287
chr10	124674860	124675360
chr12	24810341	24810841
chr5	2502208	2502708
chr19	5313306	5313806
chr10	58883245	58883745
chr20	25221755	25222255
chr4	88753994	88754494
chr12	39872306	39872806
chr12	109116265	109116765
chr2	98536133	98536633
chr13	78596604	78597104
chr5	60604699	60605199
chr6	112483005	112483505
chr5	133203584	133204084
chr3	154429968	154430468
chr1	4047978	4048478
chr9	79817681	79818181
chr14	44404918	44405418
chr16	54344736	54345236
chr5	72541384	72541884
chr4	181177921	181178421
chr12	8665595	8666095
chr16	72312816	72313316
chr2	38794208	38794708
chr4	71241690	71242190
chr4	146514972	146515472
chr6	78710797	78711297
chr6	134866481	134866981
chr7	91570539	91571039
chr9	30239824	30240324
chr9	93004710	93005210
chr9	37640213	37640713
chr2	194655563	194656063
chr8	38734585	38735085
chr16	69893682	69894182
chr11	47330568	47331068
chr8	32219719	32220219
chr12	113097660	113098160
chr2	28587863	28588363
chr5	139132075	139132575
chr7	139714384	139714884
chr11	94883215	94883715
chr2	148920569	148921069
chr2	2941078	2941578
chr8	132121712	132122212
chr1	91100171	91100671
chr9	35529435	35529935
chr20	63664791	63665291
chr3	150149667	150150167
chr5	168734618	168735118
chr11	126519872	126520372
chr12	54587875	54588375
chr3	180024518	180025018
chr2	45199816	45200316
chr3	156425584	156426084
chr1	177130533	177131033
chr14	50056335	50056835
chr19	33493843	33494343
chr17	32256576	32257076
chr20	12173306	12173806
chr10	75682598	75683098
chr8	42214946	42215446
chr10	44982134	44982634
chr18	61734298	61734798
chr12	108050674	108051174
chr2	223337916	223338416
chr10	31649872	31650372
chr6	166565020	166565520
chr3	59374046	59374546
chr6	80210520	80211020
chr10	111827469	111827969
chr20	24138163	24138663
chr6	131549053	131549553
chr2	44010153	44010653
chr17	38601460	38601960
chr7	102266496	102266996
chr11	61706386	61706886
chr17	58328631	58329131
chr1	24015764	24016264
chr18	48321528	48322028
chr8	10220876	10221376
chr21	43880577	43881077
chr7	46446124	46446624
chr14	96099991	96100491
chr6	139028799	139029299
chr9	81317878	81318378
chr12	113098243	113098743
chr13	112560639	112561139
chr16	87540017	87540517
chr13	102931496	102931996
chr5	31366861	31367361
chr17	66976679	66977179
chr8	55954902	55955402
chr18	41050368	41050868
chr11	95697266	95697766
chr15	33160484	33160984
chr19	47446924	47447424
chr1	229990606	229991106
chr8	131504628	131505128
chr19	3266720	3267220
chr8	66332863	66333363
chr12	118921742	118922242
chr2	134706533	134707033
chr14	57481922	57482422
chr17	32936070	32936570
chr18	3804463	3804963
chr8	41871795	41872295
chr3	71171361	71171861
chr3	186930019	186930519
chr11	120628693	120629193
chr12	93274247	93274747
chr5	110378079	110378579
chr7	119241929	119242429
chr11	132802892	132803392
chr4	3239914	3240414
chr10	1593661	1594161
chr3	131602385	131602885
chr11	132858227	132858727
chr7	95951557	95952057
chr5	68740428	68740928
chr7	98562460	98562960
chr22	28029813	28030313
chr14	76426890	76427390
chr2	105080810	105081310
chr5	51387417	51387917
chr17	76927463	76927963
chr8	130886055	130886555
chr6	71072419	71072919
chr9	6123377	6123877
chr12	20445619	20446119
chr4	150385509	150386009
chr5	1462349	1462849
chr1	245680372	245680872
chr1	169483487	169483987
chr1	236844576	236845076
chr11	18933479	18933979
chr18	29078215	29078715
chr20	38329086	38329586
chr22	38829337	38829837
chr6	156336016	156336516
chr7	134669969	134670469
chr9	84778559	84779059
chr3	135806288	135806788
chr3	12898289	12898789
chr1	205298421	205298921
chr22	44595770	44596270
chr5	176853321	176853821
chr8	27664839	27665339
chr17	67528931	67529431
chr20	63484300	63484800
chr18	72940907	72941407
chr13	112729338	112729838
chr2	105567990	105568490
chr15	81625817	81626317
chr5	74337795	74338295
chr1	203282888	203283388
chr16	72858436	72858936
chr5	114448400	114448900
chr2	238406377	238406877
chr8	42703525	42704025
chr3	24296031	24296531
chr20	59723033	59723533
chr4	5877231	5877731
chr1	14959394	14959894
chr1	152968340	152968840
chr8	139736431	139736931
chr2	55875701	55876201
chr2	202161405	202161905
chr5	51074618	51075118
chr5	150290297	150290797
chr22	35350726	35351226
chr6	21289764	21290264
chr15	78354621	78355121
chr6	162379721	162380221
chr13	96274473	96274973
chr16	63963711	63964211
chr19	50167262	50167762
chr5	56233137	56233637
chr22	31575064	31575564
chr11	131275514	131276014
chr2	106767763	106768263
chr11	29628690	29629190
chr7	94451191	94451691
chr4	104902170	104902670
chr8	57344991	57345491
chr3	56903304	56903804
chr16	28311835	28312335
chr11	112188548	112189048
chr1	5455939	5456439
chr11	24082823	24083323
chr17	32634090	32634590
chr12	1828903	1829403
chr12	32047720	32048220
chr9	92736463	92736963
chr14	100643419	100643919
chr11	3232192	3232692
chr17	79617663	79618163
chr4	23930704	23931204
chr1	220300342	220300842
chr3	94306089	94306589
chr6	4902988	4903488
chr12	99617905	99618405
chr3	37910968	37911468
chr8	88245191	88245691
chr9	98538545	98539045
chr5	167317732	167318232
chr11	131962463	131962963
chr16	6560632	6561132
chr17	50120336	50120836
chr6	44332673	44333173
chr3	31678479	31678979
chr2	25025981	25026481
chr12	128056295	128056795
chr18	8381986	8382486
chr8	106924927	106925427
chr16	11032865	11033365
chr16	58464766	58465266
chr3	37952454	37952954
chr3	105146904	105147404
chr5	153459283	153459783
chr12	116065510	116066010
chr4	57478336	57478836
chr8	30383733	30384233
chr2	133421506	133422006
chr1	182617935	182618435
chr13	36872569	36873069
chr21	30981363	30981863
chr1	111860383	111860883
chr20	17377227	17377727
chr14	75340935	75341435
chr2	143070055	143070555
chr12	131209500	131210000
chr2	151038445	151038945
chr11	19806152	19806652
chr13	87538558	87539058
chr5	51399272	51399772
chr9	108800819	108801319
chr5	95853252	95853752
chr11	118903299	118903799
chr12	29308311	29308811
chr15	29454489	29454989
chr16	7288831	7289331
chr18	41674491	41674991
chr3	125948812	125949312
chr1	186578886	186579386
chr12	21884888	21885388
chr13	70682469	70682969
chr2	67836861	67837361
chr6	24918483	24918983
chr8	34140558	34141058
chr8	48473835	48474335
chr3	195891652	195892152
chr3	131505340	131505840
chr10	98459013	98459513
chr1	106888994	106889494
chr20	19981072	19981572
chr8	108760078	108760578
chr2	229524736	229525236
chr9	136697242	136697742
chr13	35764174	35764674
chr1	217019483	217019983
chr4	1937374	1937874
chr3	188208395	188208895
chr2	9191643	9192143
chr2	108636270	108636770
chr14	95261033	95261533
chr2	151560203	151560703
chr1	154708060	154708560
chr7	132689293	132689793
chr13	43305648	43306148
chr19	28999684	29000184
chr3	95277494	95277994
chr11	28616798	28617298
chr4	151982653	151983153
chr3	131417660	131418160
chr5	51748578	51749078
chr10	43075665	43076165
chr10	74113958	74114458
chr7	16582005	16582505
chr12	124152662	124153162
chr4	43014305	43014805
chr1	116099905	116100405
chr4	169841431	169841931
chr1	51002560	51003060
chr7	4519476	4519976
chr16	16071513	16072013
chr3	184261910	184262410
chr12	67413606	67414106
chr12	100913885	100914385
chr13	30752050	30752550
chr16	66661415	66661915
chr19	13355741	13356241
chr6	76768209	76768709
chr6	82033436	82033936
chr7	76193103	76193603
chr7	113608869	113609369
chr9	25241390	25241890
chr9	100794848	100795348
chr7	140231125	140231625
chr9	101275064	101275564
chr3	185399969	185400469
chr17	64679617	64680117
chr6	5996678	5997178
chr2	200713008	200713508
chr2	204828161	204828661
chr14	51843949	51844449
chr12	100494284	100494784
chr16	70407956	70408456
chr14	51846752	51847252
chr11	123509626	123510126
chr13	70107552	70108052
chr11	23095744	23096244
chr6	50351238	50351738
chr8	13339748	13340248
chr17	72063171	72063671
chr3	50648241	50648741
chr16	79387293	79387793
chr2	42744599	42745099
chr1	7375953	7376453
chr21	41053069	41053569
chr3	53897015	53897515
chr1	116311789	116312289
chr5	16538851	16539351
chr5	156405897	156406397
chr9	135017794	135018294
chr2	235727831	235728331
chr11	32297597	32298097
chr18	45016515	45017015
chr5	16624852	16625352
chr1	11881032	11881532
chr15	51686120	51686620
chr3	36097864	36098364
chr1	98969643	98970143
chr9	84850891	84851391
chr6	52074683	52075183
chr9	36802425	36802925
chr15	68646050	68646550
chr4	8005677	8006177
chr16	88870460	88870960
chr16	49702035	49702535
chr18	64234270	64234770
chr2	25960345	25960845
chr6	79600660	79601160
chr6	161358944	161359444
chr21	45769527	45770027
chr11	92626569	92627069
chr16	85461648	85462148
chr10	22539531	22540031
chr1	184209976	184210476
chr4	184805529	184806029
chr3	117788141	117788641
chr15	99495915	99496415
chr8	140588922	140589422
chr3	120448668	120449168
chr11	67302074	67302574
chr8	95011161	95011661
chr18	12237110	12237610
chr7	102431601	102432101
chr1	93715655	93716155
chr14	61258852	61259352
chr1	205012771	205013271
chr2	3472879	3473379
chr2	134593512	134594012
chr7	127862547	127863047
chr8	118084163	118084663
chr1	41712747	41713247
chr10	24700998	24701498
chr13	43325642	43326142
chr8	88035416	88035916
chr9	69580487	69580987
chr1	167686924	167687424
chr13	78292795	78293295
chr16	6562859	6563359
chr1	4749129	4749629
chr5	164708801	164709301
chr4	3188197	3188697
chr7	155053031	155053531
chr11	17811232	17811732
chr4	22293317	22293817
chr5	175823608	175824108
chr1	179729729	179730229
chr4	6067730	6068230
chr4	14247692	14248192
chr12	66862236	66862736
chr9	108456891	108457391
chr11	26072511	26073011
chr16	73315610	73316110
chr1	114262414	114262914
chr14	101719986	101720486
chr8	84518575	84519075
chr11	22591497	22591997
chr18	5577418	5577918
chr18	68489088	68489588
chr8	42697080	42697580
chr5	107633303	107633803
chr6	5999341	5999841
chr7	1989589	1990089
chr9	123034204	123034704
chr11	107140986	107141486
chr4	157300776	157301276
chr5	2091817	2092317
chr9	119322099	119322599
chr1	180691512	180692012
chr6	112298756	112299256
chr13	45781945	45782445
chr9	82332229	82332729
chr15	43955070	43955570
chr4	45101375	45101875
chr19	38173332	38173832
chr22	33271321	33271821
chr10	75924341	75924841
chr9	89408427	89408927
chr11	107753207	107753707
chr5	29779079	29779579
chr5	161302532	161303032
chr9	23586841	23587341
chr7	101896254	101896754
chr15	88258247	88258747
chr3	148203256	148203756
chr1	225755915	225756415
chr16	84074758	84075258
chr13	66860766	66861266
chr7	112566316	112566816
chr8	25000557	25001057
chr10	13822428	13822928
chr2	38672997	38673497
chr21	40547231	40547731
chr1	229389136	229389636
chr10	60511434	60511934
chr17	32503516	32504016
chr3	101102601	101103101
chr10	103833500	103834000
chr14	63987138	63987638
chr18	28071173	28071673
chr22	47654985	47655485
chr3	37553162	37553662
chr3	55642001	55642501
chr4	121457637	121458137
chr5	5795077	5795577
chr6	6337509	6338009
chr7	151020226	151020726
chr8	114930320	114930820
chr9	98323640	98324140
chr18	41646914	41647414
chr12	117033950	117034450
chr1	30698641	30699141
chr5	138603469	138603969
chr10	130215860	130216360
chr3	2838549	2839049
chr6	109424087	109424587
chr1	106568159	106568659
chr17	17062321	17062821
chr7	25353171	25353671
chr1	181485131	181485631
chr2	79179015	79179515
chr13	78605158	78605658
chr10	127999304	127999804
chr1	81921286	81921786
chr10	105388613	105389113
chr18	11176498	11176998
chr5	141811783	141812283
chr2	49041075	49041575
chr12	15318778	15319278
chr20	63400438	63400938
chr11	127195563	127196063
chr12	108121101	108121601
chr22	30373993	30374493
chr5	87158511	87159011
chr19	18507739	18508239
chr1	24120277	24120777
chr7	42991238	42991738
chr1	41919951	41920451
chr4	113288673	113289173
chr14	39568964	39569464
chr6	118031445	118031945
chr8	57891654	57892154
chr16	75272015	75272515
chr11	134276576	134277076
chr12	93183786	93184286
chr15	60868133	60868633
chr2	3347661	3348161
chr5	2754989	2755489
chr6	74749162	74749662
chr3	5252073	5252573
chr16	58463427	58463927
chr6	157156639	157157139
chr8	74217730	74218230
chr3	66428668	66429168
chr20	19466431	19466931
chr6	161088819	161089319
chr14	90522785	90523285
chr6	161226623	161227123
chr10	67171941	67172441
chr14	34227929	34228429
chr2	1268666	1269166
chr5	1974571	1975071
chr16	15590887	15591387
chr1	68938204	68938704
chr3	38957929	38958429
chr15	80569102	80569602
chr2	231278831	231279331
chr22	50065667	50066167
chr17	4499713	4500213
chr1	193567001	193567501
chr1	46551508	46552008
chr1	63922837	63923337
chr9	98168866	98169366
chr22	26444285	26444785
chr5	2612411	2612911
chr13	44603761	44604261
chr5	150632544	150633044
chr5	100827296	100827796
chr7	142511214	142511714
chr1	112285738	112286238
chr15	84885796	84886296
chr9	133889374	133889874
chr15	69587657	69588157
chr12	21572698	21573198
chr17	21376024	21376524
chr18	4636938	4637438
chr3	184262470	184262970
chr2	3006035	3006535
chr1	44636525	44637025
chr13	78603369	78603869
chr6	111743810	111744310
chr7	25341090	25341590
chr7	70417027	70417527
chr2	139967719	139968219
chr1	77014053	77014553
chr2	162838506	162839006
chr7	5699882	5700382
chr9	135099521	135100021
chr11	133498468	133498968
chr9	129868937	129869437
chr10	18455606	18456106
chr18	46567097	46567597
chr8	24649559	24650059
chr18	63082222	63082722
chr6	166908031	166908531
chr18	23887451	23887951
chr4	5382722	5383222
chr10	25641565	25642065
chr12	43273300	43273800
chr4	14782877	14783377
chr7	101516795	101517295
chr10	78757306	78757806
chr8	136765938	136766438
chr2	222572778	222573278
chr18	35032052	35032552
chr16	52929988	52930488
chr9	2253924	2254424
chr8	9244493	9244993
chr3	184986424	184986924
chr7	69419012	69419512
chr14	93045136	93045636
chr19	48340874	48341374
chr9	110712298	110712798
chr1	80536542	80537042
chr1	164699802	164700302
chr15	35290189	35290689
chr7	141365934	141366434
chr21	43319224	43319724
chr5	180343816	180344316
chr2	217808232	217808732
chr2	231940561	231941061
chr11	82303608	82304108
chr16	4003168	4003668
chr16	19874838	19875338
chr16	27083883	27084383
chr5	50964186	50964686
chr1	27104677	27105177
chr15	74129926	74130426
chr5	58890976	58891476
chr1	68846767	68847267
chr10	113898161	113898661
chr13	66861369	66861869
chr13	74555198	74555698
chr19	6476055	6476555
chr2	1744314	1744814
chr2	24861419	24861919
chr2	38012743	38013243
chr2	217724417	217724917
chr3	187593328	187593828
chr4	89757208	89757708
chr5	51661178	51661678
chr5	73124070	73124570
chr6	24919023	24919523
chr6	156053245	156053745
chr8	24643764	24644264
chr8	98520879	98521379
chr8	124954326	124954826
chr6	5996065	5996565
chr15	28984918	28985418
chr1	48920742	48921242
chr3	43994956	43995456
chr2	184597668	184598168
chr1	237613907	237614407
chr18	64244507	64245007
chr18	6054077	6054577
chr3	173681206	173681706
chr21	28385807	28386307
chr1	163863755	163864255
chr10	5752294	5752794
chr10	100390766	100391266
chr10	19952046	19952546
chr1	214030598	214031098
chr11	123227362	123227862
chr15	69104363	69104863
chr2	11391505	11392005
chr21	36413770	36414270
chr5	170355556	170356056
chr2	235355356	235355856
chr9	3419970	3420470
chr4	172545477	172545977
chr1	4750126	4750626
chr10	118487920	118488420
chr6	5203506	5204006
chr5	176167737	176168237
chr3	20100810	20101310
chr5	107909538	107910038
chr15	29376624	29377124
chr15	99495362	99495862
chr2	225013362	225013862
chr4	154030763	154031263
chr14	63761668	63762168
chr2	114737456	114737956
chr22	41232585	41233085
chr15	55695408	55695908
chr15	70376126	70376626
chr1	115071634	115072134
chr12	4813710	4814210
chr5	102755871	102756371
chr20	891054	891554
chr8	79065163	79065663
chr2	160293263	160293763
chr8	17686993	17687493
chr5	146762943	146763443
chr2	120227389	120227889
chr17	17180094	17180594
chr4	41256607	41257107
chr18	47560666	47561166
chr5	78626103	78626603
chr4	3813751	3814251
chr18	46574394	46574894
chr4	6020559	6021059
chr12	20528151	20528651
chr3	67852653	67853153
chr5	34743784	34744284
chr13	45535431	45535931
chr6	131182912	131183412
chr12	70920521	70921021
chr9	107699087	107699587
chr12	23561518	23562018
chr12	76144153	76144653
chr20	53260162	53260662
chr7	84746352	84746852
chr14	50875489	50875989
chr17	8079166	8079666
chr9	123331985	123332485
chr14	76257267	76257767
chr3	9728871	9729371
chr16	9885472	9885972
chr10	100364848	100365348
chr20	48569566	48570066
chr7	84533044	84533544
chr11	123228432	123228932
chr5	95068365	95068865
chr5	95672982	95673482
chr5	73311216	73311716
chr1	12475453	12475953
chr6	161717657	161718157
chr11	107956489	107956989
chr12	80935049	80935549
chr5	170612289	170612789
chr6	5396465	5396965
chr11	109423225	109423725
chr2	183474858	183475358
chr12	70891148	70891648
chr15	67134752	67135252
chr5	62041260	62041760
chr10	46555660	46556160
chr1	25760789	25761289
chr9	107221958	107222458
chr20	2341535	2342035
chr20	63481983	63482483
chr18	79275936	79276436
chr2	52895863	52896363
chr8	55411544	55412044
chr1	204267461	204267961
chr5	14301227	14301727
chr11	78260019	78260519
chr16	72838929	72839429
chr18	13563383	13563883
chr2	168362057	168362557
chr2	132726128	132726628
chr18	35117818	35118318
chr2	54310247	54310747
chr10	83539910	83540410
chr9	127887763	127888263
chr17	80774009	80774509
chr1	209601991	209602491
chr10	71266248	71266748
chr5	138055192	138055692
chr7	30683758	30684258
chr1	24419286	24419786
chr5	17477520	17478020
chr7	44761601	44762101
chr5	2752040	2752540
chr8	139803538	139804038
chr7	216689	217189
chr11	78757521	78758021
chr3	11566874	11567374
chr6	36863546	36864046
chr11	131546417	131546917
chr8	5633805	5634305
chr9	83239127	83239627
chr19	46984697	46985197
chr5	159101721	159102221
chr6	131976464	131976964
chr11	18971441	18971941
chr5	51817325	51817825
chr6	63883050	63883550
chr8	70025183	70025683
chr11	31110818	31111318
chr15	101330282	101330782
chr17	10792128	10792628
chr15	47404782	47405282
chr5	87182913	87183413
chr8	30538450	30538950
chr8	121921029	121921529
chr11	36824757	36825257
chr12	33613436	33613936
chr15	34358342	34358842
chr8	133674622	133675122
chr11	131616480	131616980
chr4	77445746	77446246
chr5	3385478	3385978
chr12	97713848	97714348
chr14	39873178	39873678
chr1	7657691	7658191
chr21	40345648	40346148
chr4	153061889	153062389
chr2	77228419	77228919
chr6	145716084	145716584
chr11	41950740	41951240
chr20	2697726	2698226
chr16	20394025	20394525
chr14	26004316	26004816
chr7	52249661	52250161
chr1	151384414	151384914
chr11	9019056	9019556
chr18	9814404	9814904
chr2	161380582	161381082
chr7	30268616	30269116
chr9	26219875	26220375
chr13	113533434	113533934
chr2	47274159	47274659
chr8	117860975	117861475
chr8	127763781	127764281
chr2	225597858	225598358
chr11	79052512	79053012
chr17	17180668	17181168
chr3	44982856	44983356
chr3	59839407	59839907
chr4	12519430	12519930
chr11	82723600	82724100
chr20	57679907	57680407
chr1	7743285	7743785
chr13	103775002	103775502
chr16	22813913	22814413
chr18	23532776	23533276
chr6	49914920	49915420
chr12	108151762	108152262
chr22	36046010	36046510
chr4	108540457	108540957
chr12	24796845	24797345
chr9	133506616	133507116
chr2	3257127	3257627
chr8	20595534	20596034
chr4	6427457	6427957
chr12	67772646	67773146
chr8	41728667	41729167
chr22	44267469	44267969
chr13	34418885	34419385
chr3	186052153	186052653
chr4	7642708	7643208
chr10	71860350	71860850
chr1	7589318	7589818
chr1	33898688	33899188
chr1	167430758	167431258
chr11	22349428	22349928
chr11	23759386	23759886
chr13	78294589	78295089
chr2	122167441	122167941
chr2	151638013	151638513
chr20	8632603	8633103
chr20	12725225	12725725
chr4	75429454	75429954
chr5	10108750	10109250
chr6	74346877	74347377
chr7	25303314	25303814
chr8	73356406	73356906
chr9	23658785	23659285
chr9	120866260	120866760
chr3	117671715	117672215
chr13	51717976	51718476
chr3	127138668	127139168
chr11	18792107	18792607
chr11	120756778	120757278
chr16	54519280	54519780
chr1	32062445	32062945
chr7	27867288	27867788
chr3	77158608	77159108
chr5	176553983	176554483
chr18	5629313	5629813
chr1	87327323	87327823
chr2	162839280	162839780
chr6	138450261	138450761
chr8	10850305	10850805
chr20	51159252	51159752
chr13	113995041	113995541
chr11	132161289	132161789
chr16	24677345	24677845
chr4	121454535	121455035
chr8	9266443	9266943
chr2	105556876	105557376
chr1	83665778	83666278
chr2	153797391	153797891
chr5	175385876	175386376
chr6	36927883	36928383
chr4	4386705	4387205
chr5	2701166	2701666
chr19	13507264	13507764
chr1	57054115	57054615
chr10	110408845	110409345
chr1	183327576	183328076
chr6	113433510	113434010
chr3	10977910	10978410
chr12	42466259	42466759
chr12	64824365	64824865
chr20	11943769	11944269
chr6	112436952	112437452
chr7	91469223	91469723
chr4	3406998	3407498
chr6	111825921	111826421
chr1	50108616	50109116
chr5	2489316	2489816
chr9	117303633	117304133
chr12	62693038	62693538
chr1	217194107	217194607
chr5	150309506	150310006
chr9	26210241	26210741
chr1	4726586	4727086
chr8	75780832	75781332
chr7	102019831	102020331
chr14	44988565	44989065
chr12	45533977	45534477
chr11	132743698	132744198
chr16	9824137	9824637
chr9	98989205	98989705
chr18	43277268	43277768
chr20	51686986	51687486
chr3	188845412	188845912
chr5	75993129	75993629
chr5	174948857	174949357
chr11	22341420	22341920
chr10	3423376	3423876
chr12	113003639	113004139
chr22	33335120	33335620
chr2	229666971	229667471
chr4	85491490	85491990
chr7	35624451	35624951
chr13	97339792	97340292
chr11	122277266	122277766
chr14	89253104	89253604
chr13	29162602	29163102
chr7	46603668	46604168
chr9	115767066	115767566
chr5	51373634	51374134
chr5	60196315	60196815
chr1	28104986	28105486
chr2	107265972	107266472
chr3	9697441	9697941
chr3	112015888	112016388
chr5	150609875	150610375
chr6	69230827	69231327
chr1	23171210	23171710
chr3	112020744	112021244
chr1	111666909	111667409
chr3	55571025	55571525
chr3	129850975	129851475
chr9	89014056	89014556
chr1	11179452	11179952
chr2	159012451	159012951
chr3	87151724	87152224
chr18	7812592	7813092
chr4	38008564	38009064
chr9	132039948	132040448
chr1	62246137	62246637
chr7	39461216	39461716
chr15	41891909	41892409
chr6	151288664	151289164
chr7	85184987	85185487
chr1	246031991	246032491
chr16	7086793	7087293
chr17	33140591	33141091
chr18	62612487	62612987
chr19	17032224	17032724
chr15	29867037	29867537
chr15	94970674	94971174
chr18	61677483	61677983
chr2	241230309	241230809
chr18	9797180	9797680
chr4	173018396	173018896
chr11	79077611	79078111
chr8	48580336	48580836
chr21	31983235	31983735
chr8	3766777	3767277
chr12	116968870	116969370
chr20	33949123	33949623
chr1	112338855	112339355
chr1	59150918	59151418
chr2	238397290	238397790
chr11	132473115	132473615
chr12	13980076	13980576
chr3	65351198	65351698
chr10	47260514	47261014
chr13	113098120	113098620
chr2	214542197	214542697
chr21	29812800	29813300
chr2	20544017	20544517
chr1	119779991	119780491
chr12	106126522	106127022
chr10	60366909	60367409
chr3	46892431	46892931
chr13	112843528	112844028
chr19	46829745	46830245
chr2	145203905	145204405
chr10	114492282	114492782
chr12	106195455	106195955
chr14	95123842	95124342
chr9	86580724	86581224
chr3	143292923	143293423
chr5	102904995	102905495
chr12	72502428	72502928
chr3	55531271	55531771
chr1	30250312	30250812
chr2	161017551	161018051
chr3	188207693	188208193
chr19	31421404	31421904
chr4	146847249	146847749
chr2	166351310	166351810
chr5	64587329	64587829
chr10	127155897	127156397
chr16	73693233	73693733
chr3	102297043	102297543
chr12	14207698	14208198
chr15	100966944	100967444
chr20	19710400	19710900
chr3	12693676	12694176
chr7	101179130	101179630
chr5	91955563	91956063
chr8	41875709	41876209
chr3	37458367	37458867
chr14	88901435	88901935
chr11	45028621	45029121
chr18	5155866	5156366
chr1	73914965	73915465
chr1	168613585	168614085
chr12	91936949	91937449
chr20	11702637	11703137
chr3	10707960	10708460
chr3	115626069	115626569
chr5	76083083	76083583
chr9	100957959	100958459
chr14	95932536	95933036
chr20	59839511	59840011
chr6	114343391	114343891
chr2	184692302	184692802
chr6	158031970	158032470
chr10	3765960	3766460
chr17	4163053	4163553
chr4	6360267	6360767
chr11	79253254	79253754
chr1	78079101	78079601
chr1	80535440	80535940
chr1	245814362	245814862
chr10	10372065	10372565
chr10	28236572	28237072
chr10	43076726	43077226
chr12	13927134	13927634
chr13	78621129	78621629
chr14	59815028	59815528
chr19	17681453	17681953
chr2	181218232	181218732
chr21	40753690	40754190
chr3	41808150	41808650
chr3	156561090	156561590
chr6	146427596	146428096
chr7	63984	64484
chr7	30521538	30522038
chr7	123824716	123825216
chr7	139559244	139559744
chr7	151194765	151195265
chr5	162485762	162486262
chr2	222319142	222319642
chr9	16612505	16613005
chr5	11396932	11397432
chr1	114154199	114154699
chr7	153938366	153938866
chr9	82332814	82333314
chr3	171597659	171598159
chr9	89095726	89096226
chr6	44082831	44083331
chr9	19755974	19756474
chr19	5954700	5955200
chr6	143270888	143271388
chr14	75650579	75651079
chr16	82845071	82845571
chr7	112635961	112636461
chr11	46373727	46374227
chr10	25701637	25702137
chr20	36815092	36815592
chr12	13980654	13981154
chr1	25771320	25771820
chr12	128219029	128219529
chr7	72577332	72577832
chr9	130208996	130209496
chr11	79594929	79595429
chr14	100617982	100618482
chr2	207311319	207311819
chr10	23981734	23982234
chr2	134173887	134174387
chr10	131170444	131170944
chr12	22192656	22193156
chr11	131561944	131562444
chr11	22337682	22338182
chr10	15306703	15307203
chr18	25174272	25174772
chr2	136015747	136016247
chr12	128212553	128213053
chr20	36859230	36859730
chr8	140302304	140302804
chr8	79613075	79613575
chr7	107995489	107995989
chr14	82180088	82180588
chr20	17014196	17014696
chr9	121284364	121284864
chr5	126753204	126753704
chr11	133075157	133075657
chr18	47561186	47561686
chr11	131599183	131599683
chr14	103825039	103825539
chr5	76256152	76256652
chr9	27423827	27424327
chr15	63094275	63094775
chr5	72117589	72118089
chr8	22053923	22054423
chr6	105327423	105327923
chr8	9510233	9510733
chr12	102765669	102766169
chr16	77399057	77399557
chr3	134610363	134610863
chr17	74049706	74050206
chr8	30384241	30384741
chr12	106123542	106124042
chr6	158096716	158097216
chr17	4599025	4599525
chr1	156773110	156773610
chr12	15972777	15973277
chr5	94943140	94943640
chr11	20042708	20043208
chr3	72368392	72368892
chr9	69496431	69496931
chr3	16024510	16025010
chr10	128398070	128398570
chr4	121951741	121952241
[truncated: 217 more rows]

## Sheet: RGC Fetal Peaks not Mapped 
Ontology	# Term Name	Binom Rank	Binom Raw P-Value	Binom FDR Q-Val	Binom Fold Enrichment	Binom Observed Region Hits	Binom Region Set Coverage	Hyper Rank	Hyper FDR Q-Val	Hyper Fold Enrichment	Hyper Observed Gene Hits	Hyper Total Genes	Hyper Gene Set Coverage
GO Biological Process	retinal ganglion cell axon guidance	37	9.60376e-8	3.41556e-5	2.6509	39	1.64%	217	1.19582e-4	4.2659	12	19	0.43%
	regulation of glial cell differentiation	42	2.67331e-7	8.37572e-5	2.2207	51	2.15%	194	5.71798e-5	2.7949	24	58	0.86%
	regulation of adenylate cyclase activity	60	1.48938e-6	3.26647e-4	2.0903	51	2.15%	142	8.86324e-6	2.6504	31	79	1.12%
	regulation of astrocyte differentiation	88	1.33778e-5	2.00043e-3	2.5281	28	1.18%	265	3.96158e-4	3.6586	13	24	0.47%
	positive regulation of adenylate cyclase activity	96	2.10952e-5	2.89158e-3	2.2358	34	1.43%	197	5.93328e-5	3.0179	21	47	0.76%
	positive regulation of cyclase activity	146	7.56105e-5	6.81479e-3	2.0423	36	1.52%	256	3.45991e-4	2.5892	23	60	0.83%
	axon extension involved in axon guidance	169	1.12910e-4	8.79161e-3	2.7383	19	0.80%	278	5.10840e-4	5.9100	7	8	0.25%
	positive regulation of glial cell differentiation	174	1.18255e-4	8.94321e-3	2.3019	26	1.10%	528	1.23630e-2	2.6608	13	33	0.47%
	axon extension	175	1.20402e-4	9.05356e-3	2.0919	32	1.35%	333	1.54305e-3	2.9798	15	34	0.54%
	tongue development	183	1.77533e-4	1.27659e-2	2.4968	21	0.88%	489	9.82076e-3	3.2163	10	21	0.36%
	regulation of neuroblast proliferation	198	2.65498e-4	1.76449e-2	2.1824	26	1.10%	481	8.86041e-3	2.8947	12	28	0.43%
	positive regulation of adenylate cyclase activity involved in G-protein coupled receptor signaling pathway	199	2.78438e-4	1.84119e-2	3.2386	13	0.55%	546	1.41555e-2	4.5029	6	9	0.22%
	ureteric bud elongation	220	4.20392e-4	2.51452e-2	3.5037	11	0.46%	691	4.02636e-2	5.4035	4	5	0.14%
	activation of protein kinase B activity	226	4.57654e-4	2.66472e-2	2.1784	24	1.01%	636	2.80198e-2	2.5329	12	32	0.43%
	release of sequestered calcium ion into cytosol	241	6.35600e-4	3.47048e-2	2.1671	23	0.97%	577	1.95312e-2	2.3562	15	43	0.54%
	negative regulation of glial cell differentiation	250	7.44795e-4	3.92030e-2	2.1410	23	0.97%	544	1.40460e-2	3.0701	10	22	0.36%
	lamellipodium organization	274	9.90433e-4	4.75661e-2	2.0944	23	0.97%	554	1.60919e-2	2.4884	14	38	0.50%
The test set of 2,374 genomic regions picked 2,780 genes (15%) of all 18,777 genes.
GO Biological Process has 13,159 terms covering 16,804 (89%) of all 18,777 genes.	13,159 ontology terms were tested (100%) using an annotation count range of [1, 1000].
GREAT version 4.0.4
Species assembly: hg38
Association rule: Basal+extension: 5000 bp upstream, 1000 bp downstream, 1000000 bp max extension, curated regulatory domains included
chr	start	end
chr10	117239676	117240176
chr10	127993230	127993730
chr6	4211013	4211513
chr7	4158866	4159366
chr10	100524135	100524635
chr16	83576958	83577458
chr10	128613918	128614418
chr5	133450169	133450669
chr17	6544609	6545109
chr7	45434334	45434834
chr15	64738198	64738698
chr3	32089407	32089907
chr1	225720421	225720921
chr4	4377705	4378205
chr14	85960618	85961118
chr1	204858338	204858838
chr5	34900514	34901014
chr20	41390296	41390796
chr13	70959290	70959790
chr14	104460683	104461183
chr12	5099349	5099849
chr9	125932728	125933228
chr13	78934379	78934879
chr9	135358485	135358985
chr19	5960198	5960698
chr7	87628124	87628624
chr10	12513798	12514298
chr10	97185759	97186259
chr16	79049704	79050204
chr9	127388298	127388798
chr19	49197832	49198332
chr3	123610308	123610808
chr15	58434188	58434688
chr15	76217546	76218046
chr2	60652913	60653413
chr4	3248789	3249289
chr14	32330742	32331242
chr8	37526571	37527071
chr1	145705996	145706496
chr18	23886928	23887428
chr8	17767770	17768270
chr2	5204319	5204819
chr20	43798539	43799039
chr20	59718665	59719165
chr2	10239408	10239908
chr12	70812221	70812721
chr1	47403465	47403965
chr13	26735667	26736167
chr13	93411114	93411614
chr8	73364704	73365204
chr20	57818745	57819245
chr2	108631473	108631973
chr11	124519130	124519630
chr2	239557915	239558415
chr18	10247300	10247800
chr10	93827005	93827505
chr12	62082278	62082778
chr4	82146201	82146701
chr6	5727666	5728166
chr2	225290891	225291391
chr16	88282951	88283451
chr21	38944405	38944905
chr10	117240787	117241287
chr2	174990158	174990658
chr22	31977908	31978408
chr16	23052899	23053399
chr16	87747731	87748231
chr1	181659171	181659671
chr3	159960374	159960874
chr6	17786571	17787071
chr1	91098462	91098962
chr16	17607109	17607609
chr10	33125081	33125581
chr20	40679122	40679622
chr8	29737848	29738348
chr7	39082464	39082964
chr3	141355853	141356353
chr5	146379019	146379519
chr21	26933354	26933854
chr14	95054739	95055239
chr5	51188071	51188571
chr11	80315197	80315697
chr6	112343394	112343894
chr18	53101651	53102151
chr11	63844803	63845303
chr3	140912815	140913315
chr3	9032148	9032648
chr14	65187334	65187834
chr16	81564547	81565047
chr17	38400108	38400608
chr13	109986017	109986517
chr11	110076328	110076828
chr19	47447430	47447930
chr14	72333667	72334167
chr3	14598051	14598551
chr13	52707249	52707749
chr1	240987881	240988381
chr18	32742696	32743196
chr17	73396417	73396917
chr10	128461845	128462345
chr7	136937863	136938363
chr9	98927671	98928171
chr7	5431570	5432070
chr2	54294152	54294652
chr1	84890454	84890954
chr9	85393230	85393730
chr16	84194379	84194879
chr2	27199931	27200431
chr4	146263730	146264230
chr18	75654347	75654847
chr19	10133640	10134140
chr12	114082750	114083250
chr1	109527063	109527563
chr9	119910317	119910817
chr1	181647118	181647618
chr3	168362577	168363077
chr18	8341724	8342224
chr1	157415312	157415812
chr2	129459334	129459834
chr8	102107917	102108417
chr5	53784455	53784955
chr10	17181047	17181547
chr16	82470699	82471199
chr2	207310777	207311277
chr21	38942679	38943179
chr8	11461952	11462452
chr17	10802675	10803175
chr9	101195474	101195974
chr1	245742849	245743349
chr15	33782205	33782705
chr17	73759865	73760365
chr8	22188634	22189134
chr11	44941165	44941665
chr8	134324030	134324530
chr17	57504231	57504731
chr1	6965055	6965555
chr8	27389663	27390163
chr8	92627440	92627940
chr15	52874793	52875293
chr3	114214150	114214650
chr10	122148561	122149061
chr1	245263201	245263701
chr15	83413307	83413807
chr20	60365805	60366305
chr9	98975360	98975860
chr12	110922472	110922972
chr6	131460527	131461027
chr1	234246563	234247063
chr1	233081776	233082276
chr8	127363808	127364308
chr6	35794340	35794840
chr10	78703569	78704069
chr10	100512209	100512709
chr7	98476835	98477335
chr16	85422045	85422545
chr2	221100553	221101053
chr5	172852497	172852997
chr6	107154076	107154576
chr8	38509962	38510462
chr6	50187475	50187975
chr4	25890479	25890979
chr5	168120770	168121270
chr2	20919218	20919718
chr7	150451024	150451524
chr20	58457226	58457726
chr2	175630374	175630874
chr16	47957031	47957531
chr3	177726716	177727216
chr6	142796502	142797002
chr8	142018246	142018746
chr15	85905708	85906208
chr12	2088758	2089258
chr9	109765865	109766365
chr11	117887707	117888207
chr5	98163817	98164317
chr5	172004887	172005387
chr3	41076062	41076562
chr13	78561628	78562128
chr9	99385199	99385699
chr14	50980552	50981052
chr2	100012366	100012866
chr4	183358165	183358665
chr9	38026218	38026718
chr8	142299205	142299705
chr6	155433967	155434467
chr13	46192109	46192609
chr16	55179717	55180217
chr9	98966652	98967152
chr14	103703022	103703522
chr17	59425542	59426042
chr14	88323049	88323549
chr5	90111962	90112462
chr14	21543960	21544460
chr21	43693989	43694489
chr11	82546752	82547252
chr2	235073794	235074294
chr1	204288175	204288675
chr20	42968669	42969169
chr18	7193564	7194064
chr9	13049274	13049774
chr17	3627472	3627972
chr2	233380057	233380557
chr3	186921415	186921915
chr17	50123491	50123991
chr1	117048302	117048802
chr15	73303778	73304278
chr1	203364376	203364876
chr10	111246719	111247219
chr14	20733217	20733717
chr11	112916670	112917170
chr13	106799741	106800241
chr11	19766141	19766641
chr3	41593052	41593552
chr9	89716498	89716998
chr14	99361742	99362242
chr2	7009789	7010289
chr5	149777685	149778185
chr4	184392286	184392786
chr9	4590702	4591202
chr16	84058588	84059088
chr16	85003176	85003676
chr10	3331016	3331516
chr5	146398835	146399335
chr8	144489461	144489961
chr10	69439764	69440264
chr11	18007802	18008302
chr17	34479257	34479757
chr20	39651818	39652318
chr12	4167981	4168481
chr11	62769729	62770229
chr7	139075995	139076495
chr2	45794029	45794529
chr16	67164011	67164511
chr8	79242976	79243476
chr19	4774215	4774715
chr2	117418588	117419088
chr8	24618182	24618682
chr5	122390130	122390630
chr3	167067384	167067884
chr11	15446963	15447463
chr1	228781126	228781626
chr3	80439489	80439989
chr11	11755216	11755716
chr1	37410126	37410626
chr16	27572785	27573285
chr20	7199832	7200332
chr12	53795864	53796364
chr10	33129587	33130087
chr22	50514819	50515319
chr13	53214410	53214910
chr6	107712949	107713449
chr3	32469081	32469581
chr4	146646835	146647335
chr12	5087291	5087791
chr8	24654039	24654539
chr18	7596052	7596552
chr7	140594252	140594752
chr12	30191616	30192116
chr4	7831802	7832302
chr5	175880903	175881403
chr7	4498674	4499174
chr12	129564234	129564734
chr10	86649566	86650066
chr7	54556196	54556696
chr8	1100883	1101383
chr14	66072148	66072648
chr5	59751322	59751822
chr5	142613258	142613758
chr9	121815621	121816121
chr7	29157088	29157588
chr5	10729984	10730484
chr17	3596485	3596985
chr1	3692533	3693033
chr8	21013365	21013865
chr1	38068149	38068649
chr4	8039232	8039732
chr2	44680271	44680771
chr18	7618921	7619421
chr11	62114212	62114712
chr6	170510563	170511063
chr18	4807489	4807989
chr2	57740853	57741353
chr21	40687586	40688086
chr19	19214021	19214521
chr9	16412509	16413009
chr5	158473383	158473883
chr5	122585454	122585954
chr19	28126088	28126588
chr7	27519747	27520247
chr3	115699195	115699695
chr1	53026249	53026749
chr10	18402775	18403275
chr16	89049644	89050144
chr17	36207149	36207649
chr18	34894009	34894509
chr2	86807412	86807912
chr18	48350956	48351456
chr3	135131241	135131741
chr20	62286727	62287227
chr7	55512774	55513274
chr6	157155776	157156276
chr1	43577987	43578487
chr1	159478688	159479188
chr12	106814829	106815329
chr15	35810950	35811450
chr3	38987129	38987629
chr22	19623094	19623594
chr12	131564777	131565277
chr1	154862833	154863333
chr18	80109008	80109508
chr11	69002246	69002746
chr16	83681286	83681786
chr4	149987813	149988313
chr12	120012263	120012763
chr2	167832739	167833239
chr9	129211672	129212172
chr1	50275504	50276004
chr7	39430916	39431416
chr2	10225503	10226003
chr2	31142031	31142531
chr3	29156022	29156522
chr13	27137667	27138167
chr4	184438694	184439194
chr13	93824165	93824665
chr1	201320302	201320802
chr16	73403145	73403645
chr9	37923189	37923689
chr18	11046001	11046501
chr15	96347307	96347807
chr8	17898568	17899068
chr18	53268582	53269082
chr22	41461848	41462348
chr2	31006628	31007128
chr14	98391090	98391590
chr17	29826017	29826517
chr2	235201574	235202074
chr8	104426412	104426912
chr1	200519888	200520388
chr2	128976958	128977458
chr2	205715152	205715652
chr13	34879788	34880288
chr10	2038052	2038552
chr16	57842144	57842644
chr3	64253844	64254344
chr7	49526423	49526923
chr2	12391014	12391514
chr11	44793686	44794186
chr6	132171794	132172294
chr12	131246937	131247437
chr7	41730931	41731431
chr2	149155207	149155707
chr17	5601512	5602012
chr1	16717574	16718074
chr11	28481487	28481987
chr1	22799886	22800386
chr13	30125383	30125883
chr19	3881478	3881978
chr1	199912974	199913474
chr17	68460294	68460794
chr2	47456928	47457428
chr2	224069672	224070172
chr6	120542522	120543022
chr8	11039628	11040128
chr9	83407885	83408385
chr1	230353682	230354182
chr2	225649961	225650461
chr22	22681279	22681779
chr17	70105050	70105550
chr4	48131639	48132139
chr14	81947049	81947549
chr10	31678565	31679065
chr11	57340183	57340683
chr7	141228400	141228900
chr3	16067986	16068486
chr5	11158290	11158790
chr10	129887457	129887957
chr13	98436550	98437050
chr11	125236032	125236532
chr10	76953588	76954088
chr1	43292133	43292633
chr10	79193904	79194404
chr14	101474751	101475251
chr1	225721107	225721607
chr3	71169029	71169529
chr1	209884631	209885131
chr20	41304046	41304546
chr13	112669838	112670338
chr5	155066236	155066736
chr1	175405486	175405986
chr3	40780853	40781353
chr1	235475138	235475638
chr7	70432480	70432980
chr14	47966421	47966921
chr2	95007744	95008244
chr19	2332207	2332707
chr4	104235934	104236434
chr16	18045271	18045771
chr8	63892136	63892636
chr1	114105412	114105912
chr13	32838743	32839243
chr6	38366168	38366668
chr4	175772422	175772922
chr5	112215697	112216197
chr20	61667697	61668197
chr8	99774864	99775364
chr1	220783532	220784032
chr11	29656529	29657029
chr12	97954826	97955326
chr9	104319694	104320194
chr11	35454002	35454502
chr10	118506644	118507144
chr3	117798154	117798654
chr1	22651988	22652488
chr10	97131008	97131508
chr19	21508117	21508617
chr5	96923936	96924436
chr7	11540272	11540772
chr2	191560013	191560513
chr20	40875190	40875690
chr2	80002135	80002635
chr20	7697583	7698083
chr6	151276385	151276885
chr7	46693643	46694143
chr2	48713521	48714021
chr10	129568832	129569332
chr10	117240256	117240756
chr20	58228457	58228957
chr16	83923393	83923893
chr2	177015276	177015776
chr12	4926380	4926880
chr7	101633415	101633915
chr1	14683248	14683748
chr2	120904879	120905379
chr9	84831323	84831823
chr14	87730696	87731196
chr2	225289853	225290353
chr8	137521523	137522023
chr1	64848737	64849237
chr16	23051460	23051960
chr18	8355884	8356384
chr1	50271192	50271692
chr2	230684679	230685179
chr17	45136479	45136979
chr16	73716480	73716980
chr11	45029327	45029827
chr10	129648942	129649442
chr2	100177290	100177790
chr7	24110093	24110593
chr7	45435050	45435550
chr14	63918368	63918868
chr9	2289234	2289734
chr4	169069952	169070452
chr7	158097727	158098227
chr1	221923881	221924381
chr3	2790257	2790757
chr13	21887772	21888272
chr3	172844355	172844855
chr8	28869580	28870080
chr10	91884229	91884729
chr1	233939453	233939953
chr8	1435243	1435743
chr7	47646983	47647483
chr7	6164405	6164905
chr1	14080586	14081086
chr2	196511823	196512323
chr2	172860973	172861473
chr7	1901581	1902081
chr7	28942848	28943348
chr8	10333507	10334007
chr10	49359672	49360172
chr1	185942864	185943364
chr5	138830306	138830806
chr12	77599792	77600292
chr2	105176419	105176919
chr2	111841452	111841952
chr14	95262251	95262751
chr7	36602088	36602588
chr2	173819796	173820296
chr16	15158827	15159327
chr17	74452242	74452742
chr4	95452185	95452685
chr2	49021354	49021854
chr2	240991846	240992346
chr20	7189202	7189702
chr5	14336743	14337243
chr2	166482617	166483117
chr5	100772507	100773007
chr11	46020137	46020637
chr3	23601404	23601904
chr7	76191767	76192267
chr7	132455272	132455772
chr9	122052999	122053499
chr11	35714925	35715425
chr1	32055363	32055863
chr4	82124948	82125448
chr19	3455920	3456420
chr1	57599174	57599674
chr10	111076736	111077236
chr18	50126374	50126874
chr20	48793490	48793990
chr12	97650207	97650707
chr14	105255423	105255923
chr15	98321827	98322327
chr16	82972305	82972805
chr2	12060040	12060540
chr2	134165925	134166425
chr2	227971548	227972048
chr5	163207488	163207988
chr6	7762680	7763180
chr8	2093797	2094297
chr8	77166792	77167292
chr1	25255581	25256081
chr4	38132132	38132632
chr20	61461532	61462032
chr5	31618198	31618698
chr18	5540237	5540737
chr11	132664835	132665335
chr5	36730529	36731029
chr12	1519034	1519534
chr17	5601004	5601504
chr13	94303810	94304310
chr18	8348016	8348516
chr8	81008504	81009004
chr1	115712997	115713497
chr8	22156579	22157079
chr1	18458606	18459106
chr1	241828765	241829265
chr17	10894245	10894745
chr13	53321282	53321782
chr8	30576579	30577079
chr10	1591517	1592017
chr4	5568905	5569405
chr12	24279868	24280368
chr7	56115917	56116417
chr1	4127184	4127684
chr17	6160136	6160636
chr2	205965730	205966230
chr5	144235114	144235614
chr2	9359091	9359591
chr5	144204247	144204747
chr5	168365981	168366481
chr9	16316539	16317039
chr7	103809991	103810491
chr5	4000871	4001371
chr1	19737357	19737857
chr8	108847323	108847823
chr1	42422688	42423188
chr4	26582304	26582804
chr3	10823334	10823834
chr11	20739473	20739973
chr17	73462824	73463324
chr15	91610025	91610525
chr1	234700264	234700764
chr17	1162328	1162828
chr10	120282764	120283264
chr17	15109053	15109553
chr2	209779367	209779867
chr15	51251390	51251890
chr15	97072515	97073015
chr9	75396359	75396859
chr11	42407142	42407642
chr5	124706667	124707167
chr7	30520885	30521385
chr3	105422610	105423110
chr3	116395026	116395526
chr3	67818743	67819243
chr2	46493801	46494301
chr17	34247997	34248497
chr11	44788133	44788633
chr7	29069531	29070031
chr8	122322677	122323177
chr5	50966477	50966977
chr2	205556804	205557304
chr3	38825270	38825770
chr15	33584815	33585315
chr22	44075003	44075503
chr8	20842089	20842589
chr19	2215388	2215888
chr2	98373769	98374269
chr2	120429724	120430224
chr9	113933193	113933693
chr18	8657800	8658300
chr16	5619425	5619925
chr1	110561523	110562023
chr14	99766699	99767199
chr1	245834014	245834514
chr10	64050675	64051175
chr10	119237508	119238008
chr11	27195840	27196340
chr14	86357885	86358385
chr16	64907705	64908205
chr17	70102501	70103001
chr2	110962513	110963013
chr2	220111480	220111980
chr3	83452982	83453482
chr3	179531561	179532061
chr6	7742492	7742992
chr8	71535570	71536070
chr22	41359986	41360486
chr3	13347038	13347538
chr10	78217056	78217556
chr12	119375498	119375998
chr4	181504935	181505435
chr17	10920539	10921039
chr3	35785525	35786025
chr7	31047411	31047911
chr1	154329067	154329567
chr2	60320697	60321197
chr22	49005879	49006379
chr2	88069276	88069776
chr3	2770443	2770943
chr1	87937926	87938426
chr11	60785975	60786475
chr2	176553983	176554483
chr11	84890582	84891082
chr4	65522673	65523173
chr6	111957951	111958451
chr8	28579271	28579771
chr9	27568714	27569214
chr16	88282450	88282950
chr12	62694106	62694606
chr22	44463342	44463842
chr4	105914456	105914956
chr7	69995758	69996258
chr2	31053974	31054474
chr1	17717495	17717995
chr17	74247594	74248094
chr15	46281090	46281590
chr15	59284770	59285270
chr4	7371447	7371947
chr3	168484645	168485145
chr18	23273456	23273956
chr1	87787514	87788014
chr4	5774656	5775156
chr17	79685071	79685571
chr2	29421224	29421724
chr11	131796507	131797007
chr20	44031117	44031617
chr5	80168909	80169409
chr12	112808213	112808713
chr16	3187788	3188288
chr11	32171335	32171835
chr2	232502358	232502858
chr11	111406071	111406571
chr5	35884043	35884543
chr11	68421348	68421848
chr15	89150899	89151399
chr6	20771247	20771747
chr2	57710675	57711175
chr20	44919972	44920472
chr8	30339504	30340004
chr9	135010782	135011282
chr19	33613202	33613702
chr17	17937473	17937973
chr9	98568844	98569344
chr2	105593489	105593989
chr12	86052595	86053095
chr4	24985221	24985721
chr5	96381440	96381940
chr1	3821861	3822361
chr12	113239784	113240284
chr11	6405266	6405766
chr20	45338285	45338785
chr15	42027512	42028012
chr8	141268140	141268640
chr17	10837030	10837530
chr10	49500391	49500891
chr12	114045304	114045804
chr9	93945663	93946163
chr20	33111648	33112148
chr8	130642153	130642653
chr13	30257548	30258048
chr1	11845734	11846234
chr13	24712946	24713446
chr10	62083365	62083865
chr3	21580824	21581324
chr9	85333850	85334350
chr7	25726532	25727032
chr7	83475374	83475874
chr11	78940877	78941377
chr15	70526539	70527039
chr14	102327623	102328123
chr4	187124324	187124824
chr9	7662444	7662944
chr13	72071656	72072156
chr11	13312601	13313101
chr1	147752453	147752953
chr1	170340233	170340733
chr1	223482785	223483285
chr10	31679072	31679572
chr10	83866481	83866981
chr11	15991091	15991591
chr14	41318613	41319113
chr14	81816924	81817424
chr15	33093183	33093683
chr15	94743719	94744219
chr17	79698158	79698658
chr18	40546913	40547413
chr18	57986289	57986789
chr3	55667435	55667935
chr3	120275592	120276092
chr3	154572075	154572575
chr5	60227751	60228251
chr5	170423819	170424319
chr7	29319823	29320323
chr9	25956648	25957148
chr18	9649447	9649947
chr9	94908931	94909431
chr11	126748274	126748774
chr12	129362975	129363475
chr16	80932643	80933143
chr19	9905958	9906458
chr20	36162465	36162965
chr17	4247341	4247841
chr11	9601530	9602030
chr5	117902782	117903282
chr10	111266101	111266601
chr2	2731043	2731543
chr2	103401615	103402115
chr22	46457394	46457894
chr3	45959902	45960402
chr3	160966515	160967015
chr4	112142149	112142649
chr12	114011765	114012265
chr11	123231235	123231735
chr11	78270915	78271415
chr8	641463	641963
chr18	905190	905690
chr2	129436969	129437469
chr18	7392977	7393477
chr22	25884008	25884508
chr1	193359577	193360077
chr12	6775860	6776360
chr22	35489169	35489669
chr7	98462826	98463326
chr13	53350902	53351402
chr10	84397491	84397991
chr11	19377895	19378395
chr20	6062203	6062703
chr8	22055642	22056142
chr17	10837863	10838363
chr2	227006083	227006583
chr22	32958040	32958540
chr20	43820676	43821176
chr10	4352582	4353082
chr12	5428548	5429048
chr2	41111935	41112435
chr11	89361663	89362163
chr1	20230397	20230897
chr17	79671009	79671509
chr5	158874752	158875252
chr1	204771914	204772414
chr1	236688715	236689215
chr4	153024109	153024609
chr2	47572658	47573158
chr15	93458444	93458944
chr20	59398692	59399192
chr18	25068537	25069037
chr19	29263235	29263735
chr13	48853622	48854122
chr6	130363739	130364239
chr3	3570600	3571100
chr3	193194355	193194855
chr12	22321749	22322249
chr2	4243644	4244144
chr2	52622812	52623312
chr4	56957997	56958497
chr5	5807789	5808289
chr10	132240129	132240629
chr2	15666958	15667458
chr2	233174108	233174608
chr5	94891939	94892439
chr7	30700070	30700570
chr4	63799092	63799592
chr1	77370811	77371311
chr19	42179301	42179801
chr20	62830800	62831300
chr8	9553037	9553537
chr11	95965082	95965582
chr4	78167943	78168443
chr1	33962006	33962506
chr2	206702063	206702563
chr15	79406687	79407187
chr3	154029819	154030319
chr3	43133077	43133577
chr6	159815380	159815880
chr9	126422903	126423403
chr11	19551811	19552311
chr4	184358884	184359384
chr16	53762249	53762749
chr22	33186749	33187249
chr6	142811000	142811500
chr15	64180172	64180672
chr6	69106430	69106930
chr14	95542936	95543436
chr4	99584596	99585096
chr12	106125648	106126148
chr1	90106311	90106811
chr13	73792741	73793241
chr17	61097723	61098223
chr11	134460142	134460642
chr6	101422770	101423270
chr20	62461044	62461544
chr15	54029057	54029557
chr10	128366276	128366776
chr3	172876937	172877437
chr21	40042772	40043272
chr20	10060144	10060644
chr6	383785	384285
chr2	181566591	181567091
chr3	197336230	197336730
chr10	80157004	80157504
chr10	127995664	127996164
chr11	115919845	115920345
chr12	112734999	112735499
chr13	29254262	29254762
chr15	87500168	87500668
chr16	86675989	86676489
chr16	88194289	88194789
chr18	46715017	46715517
chr2	162925094	162925594
chr21	14106594	14107094
chr3	64073051	64073551
chr4	23989095	23989595
chr4	67037871	67038371
chr5	2102746	2103246
chr5	158829615	158830115
chr10	86664721	86665221
chr2	86301829	86302329
chr7	104772512	104773012
chr1	36813986	36814486
chr15	74220304	74220804
chr19	11373506	11374006
chr7	4013589	4014089
chr3	72463067	72463567
chr1	212529187	212529687
chr16	47643550	47644050
chr1	77970945	77971445
chr16	20072410	20072910
chr5	5879803	5880303
chr3	196208034	196208534
chr21	39630318	39630818
chr1	54449756	54450256
chr2	66048019	66048519
chr5	112628144	112628644
chr17	67640809	67641309
chr2	47265620	47266120
chr4	105343392	105343892
chr8	55761030	55761530
chr7	78472464	78472964
chr16	89118383	89118883
chr18	49959049	49959549
chr2	170235815	170236315
chr13	38634931	38635431
chr7	5706509	5707009
chr5	14765499	14765999
chr18	5454171	5454671
chr9	124263756	124264256
chr1	39761497	39761997
chr4	4716609	4717109
chr5	15606152	15606652
chr9	126304859	126305359
chr1	202107864	202108364
chr7	28708062	28708562
chr16	85496069	85496569
chr1	9070547	9071047
chr13	36883697	36884197
chr2	121955781	121956281
chr10	34644161	34644661
chr6	166526847	166527347
chr17	7974475	7974975
chr2	30503652	30504152
chr10	50242190	50242690
chr1	90384116	90384616
chr18	8828084	8828584
chr7	28862801	28863301
chr15	70507967	70508467
chr11	110900105	110900605
chr5	60195529	60196029
chr11	122317282	122317782
chr11	123152870	123153370
chr12	70791805	70792305
chr20	12264619	12265119
chr6	128600658	128601158
chr2	37357550	37358050
chr11	11757791	11758291
chr10	91032746	91033246
chr4	38769029	38769529
chr1	12044525	12045025
chr18	5507754	5508254
chr8	117153093	117153593
chr17	46815912	46816412
chr8	9088389	9088889
chr6	150819448	150819948
chr16	56918501	56919001
chr1	210553611	210554111
chr2	96928180	96928680
chr3	159219625	159220125
chr3	176692363	176692863
chr1	115075769	115076269
chr18	50737507	50738007
chr3	195883779	195884279
chr7	99881256	99881756
chr18	27786035	27786535
chr12	128313140	128313640
chr4	86908986	86909486
chr17	47697203	47697703
chr9	90839246	90839746
chr10	127297572	127298072
chr12	131242828	131243328
chr7	30687079	30687579
chr9	16065004	16065504
chr2	1979137	1979637
chr12	39116842	39117342
chr1	177929425	177929925
chr9	89412964	89413464
chr18	76367932	76368432
chr1	171947845	171948345
chr5	100719117	100719617
chr22	44281815	44282315
chr4	150679699	150680199
chr1	201455009	201455509
chr10	71009121	71009621
chr12	48794747	48795247
chr14	100134994	100135494
chr16	82975731	82976231
chr1	238106020	238106520
chr11	110900831	110901331
chr17	81612605	81613105
chr3	177221983	177222483
chr6	88000559	88001059
chr7	39289641	39290141
chr1	3909851	3910351
chr1	94721175	94721675
chr7	158472401	158472901
chr9	83198245	83198745
chr20	46954517	46955017
chr6	33838904	33839404
chr10	97102382	97102882
chr10	5184779	5185279
chr15	47185949	47186449
chr20	58583438	58583938
chr7	139494465	139494965
chr4	7973657	7974157
chr14	76112912	76113412
chr20	12395229	12395729
chr7	99137430	99137930
chr1	44501490	44501990
chr17	21418961	21419461
chr12	94956930	94957430
chr2	66070825	66071325
chr16	49780348	49780848
chr8	125732561	125733061
chr5	139182719	139183219
chr2	29848928	29849428
chr1	232428653	232429153
chr14	89493989	89494489
chr5	141782932	141783432
chr7	5263542	5264042
chr1	41777597	41778097
chr18	50056152	50056652
chr10	127997804	127998304
chr8	141028894	141029394
chr1	50232429	50232929
chr1	94779842	94780342
chr11	24064260	24064760
chr11	94867083	94867583
chr15	53474810	53475310
chr16	7938963	7939463
chr18	41458313	41458813
chr18	65188304	65188804
chr22	17718276	17718776
chr3	45442454	45442954
chr3	147238350	147238850
chr4	13325682	13326182
chr5	163206956	163207456
chr5	175270688	175271188
chr6	76777302	76777802
chr6	100390267	100390767
chr6	146434403	146434903
chr5	1079375	1079875
chr9	131823598	131824098
chr5	141494658	141495158
chr11	79059090	79059590
chr20	10523874	10524374
chr13	30702770	30703270
chr2	98357790	98358290
chr7	132793468	132793968
chr14	88321850	88322350
chr1	238624636	238625136
chr11	114081326	114081826
chr5	147466260	147466760
chr16	78599194	78599694
chr6	37587874	37588374
chr2	219665728	219666228
chr7	157463944	157464444
chr8	125768683	125769183
chr11	44943035	44943535
chr13	93646775	93647275
chr10	77935360	77935860
chr3	23481858	23482358
chr8	63693172	63693672
chr2	22801885	22802385
chr4	184344388	184344888
chr4	41437099	41437599
chr3	168344325	168344825
chr10	127470937	127471437
chr8	42773256	42773756
chr5	146338677	146339177
chr7	155223370	155223870
chr5	2252896	2253396
chr20	64196747	64197247
chr17	82604035	82604535
chr1	217770847	217771347
chr16	51464976	51465476
chr1	27307364	27307864
chr9	94909432	94909932
chr1	27399658	27400158
chr2	45287011	45287511
chr7	111846841	111847341
chr8	11460737	11461237
chr10	28704423	28704923
chr15	22873248	22873748
chr19	734663	735163
chr22	30861369	30861869
chr4	57484215	57484715
chr5	145469503	145470003
chr1	93691066	93691566
chr8	9335757	9336257
chr5	146339384	146339884
chr19	4018153	4018653
chr16	576835	577335
chr2	223635016	223635516
chr5	31889291	31889791
chr12	112779074	112779574
chr6	17589319	17589819
chr17	10761561	10762061
chr1	236997829	236998329
chr11	31671570	31672070
chr22	44396689	44397189
chr11	30424297	30424797
chr13	30195987	30196487
chr17	68822176	68822676
chr22	25795400	25795900
chr11	115159119	115159619
chr21	42062194	42062694
chr5	112625972	112626472
chr5	146582151	146582651
chr2	16635752	16636252
chr18	67600132	67600632
chr7	158387319	158387819
chr7	4215833	4216333
chr5	34611067	34611567
chr9	124361050	124361550
chr1	210662531	210663031
chr14	33674874	33675374
chr7	45721743	45722243
chr15	29380334	29380834
chr4	25978195	25978695
chr5	58439064	58439564
chr9	16527442	16527942
chr5	13187284	13187784
chr10	105513907	105514407
chr16	8099083	8099583
chr5	173799144	173799644
chr1	29686218	29686718
chr1	210624665	210625165
chr18	703263	703763
chr18	52979815	52980315
chr7	20235172	20235672
chr8	81094196	81094696
chr1	3869746	3870246
chr8	139821838	139822338
chr2	225660367	225660867
chr17	3532560	3533060
chr16	30004294	30004794
chr6	7789563	7790063
chr10	20535649	20536149
chr11	43250221	43250721
chr16	7921660	7922160
chr18	66432587	66433087
chr7	39466462	39466962
chr3	84042691	84043191
chr13	79033150	79033650
chr17	57541783	57542283
chr3	120281694	120282194
chr18	28414096	28414596
chr20	2740232	2740732
chr5	172369970	172370470
chr10	76967609	76968109
chr11	16895257	16895757
chr7	823674	824174
chr8	129205714	129206214
chr5	16663674	16664174
chr1	223706336	223706836
chr18	65919664	65920164
chr20	61633578	61634078
chr2	30985656	30986156
chr18	34523753	34524253
chr11	44914794	44915294
chr16	56259386	56259886
chr4	59127627	59128127
chr6	101422221	101422721
chr16	16105591	16106091
chr1	199976585	199977085
chr8	29079100	29079600
chr5	179945615	179946115
chr4	8768868	8769368
chr15	70505895	70506395
chr21	41920396	41920896
chr1	23598531	23599031
chr16	29137371	29137871
chr2	26595586	26596086
chr17	34012750	34013250
chr1	18413497	18413997
chr2	192026068	192026568
chr10	110789532	110790032
chr1	210571661	210572161
chr14	50865284	50865784
chr1	156524993	156525493
chr1	236864172	236864672
chr10	3570315	3570815
chr11	18137974	18138474
chr12	17107985	17108485
chr12	118583849	118584349
chr16	25020254	25020754
chr16	61144373	61144873
chr16	77656127	77656627
chr17	30234294	30234794
chr2	205929372	205929872
chr20	1709854	1710354
chr20	47468277	47468777
chr4	146154026	146154526
chr5	96425884	96426384
chr6	5246544	5247044
chr6	124628804	124629304
chr7	68185597	68186097
chr8	55248204	55248704
chr8	99780287	99780787
chr9	110006578	110007078
chr2	17166420	17166920
chr11	113951481	113951981
chr19	55082426	55082926
chr1	36587329	36587829
chr1	178937740	178938240
chr5	113902969	113903469
chr5	167975023	167975523
chr1	12642986	12643486
chr1	32324828	32325328
chr14	87691388	87691888
chr8	142046021	142046521
chr15	47817840	47818340
chr5	58828178	58828678
chr2	13021267	13021767
chr2	215158500	215159000
chr9	16202872	16203372
chr5	371201	371701
chr8	139909610	139910110
chr3	131550447	131550947
chr5	174221785	174222285
chr9	117302404	117302904
chr10	111076073	111076573
chr11	61542672	61543172
chr15	33768620	33769120
chr15	91635026	91635526
chr9	91127115	91127615
chr11	109308576	109309076
chr15	53521107	53521607
chr3	183576956	183577456
chr11	96074606	96075106
chr15	26583190	26583690
chr4	124534920	124535420
chr13	44652888	44653388
chr4	84042464	84042964
chr11	120067262	120067762
chr17	75012705	75013205
chr19	28587990	28588490
chr5	32100816	32101316
chr11	126546286	126546786
chr11	83097357	83097857
chr8	143221941	143222441
chr12	46206285	46206785
chr14	75935153	75935653
chr17	32995270	32995770
chr12	62933177	62933677
chr10	11357798	11358298
chr6	107617468	107617968
chr11	32043871	32044371
chr15	88105830	88106330
chr19	50178686	50179186
chr11	131957802	131958302
chr10	16481600	16482100
chr18	6770314	6770814
chr3	36560512	36561012
chr16	84003001	84003501
chr17	27345362	27345862
chr2	46485728	46486228
chr5	6342799	6343299
chr19	5077090	5077590
chr3	13597600	13598100
chr1	246199060	246199560
chr12	111098566	111099066
chr15	92315790	92316290
chr12	97493691	97494191
chr7	136063038	136063538
chr2	172984892	172985392
chr11	66862160	66862660
chr1	234489105	234489605
chr21	41338471	41338971
chr18	7990608	7991108
chr4	113164358	113164858
chr1	32273177	32273677
chr4	113116562	113117062
chr7	55110905	55111405
chr10	43262031	43262531
chr2	112182461	112182961
chr17	82602895	82603395
chr17	75808984	75809484
chr10	119535180	119535680
chr20	36887651	36888151
chr7	49497524	49498024
chr7	153991411	153991911
chr10	69440414	69440914
chr2	112691668	112692168
chr8	21876615	21877115
chr17	50426818	50427318
chr4	183142523	183143023
chr9	89631385	89631885
chr12	38954207	38954707
chr15	86274954	86275454
chr10	127993941	127994441
chr2	226459641	226460141
chr7	45436993	45437493
chr10	97123486	97123986
chr2	168742210	168742710
chr13	52689839	52690339
chr9	83199191	83199691
chr3	67869545	67870045
chr12	48183369	48183869
chr17	34816749	34817249
chr2	224169340	224169840
chr20	49432464	49432964
chr3	118769814	118770314
chr6	150277648	150278148
chr6	165691479	165691979
chr1	199728078	199728578
chr11	79368961	79369461
chr2	71577783	71578283
chr2	133328959	133329459
chr3	186939925	186940425
chr6	4639590	4640090
chr5	146395067	146395567
chr3	114514137	114514637
chr7	153951075	153951575
chr8	132341043	132341543
chr16	89116577	89117077
chr16	58429589	58430089
chr16	72055943	72056443
chr4	184504835	184505335
chr5	5857289	5857789
chr20	57807875	57808375
chr13	101810309	101810809
chr2	19456686	19457186
chr5	84564953	84565453
chr5	77847879	77848379
chr10	116744970	116745470
chr10	24496762	24497262
chr17	42830333	42830833
chr5	127094337	127094837
chr14	28482598	28483098
chr10	86205961	86206461
chr16	26400009	26400509
chr5	14731635	14732135
chr4	5999381	5999881
chr12	32279472	32279972
chr16	85460623	85461123
chr3	178880887	178881387
chr2	197082839	197083339
chr3	155386233	155386733
chr7	11202108	11202608
chr3	33217943	33218443
chr3	131049872	131050372
chr18	67467993	67468493
chr7	83769361	83769861
chr3	43153439	43153939
chr12	76463238	76463738
chr13	112753788	112754288
chr2	28583857	28584357
chr9	89438211	89438711
chr17	77100024	77100524
chr5	3351492	3351992
chr18	76996417	76996917
chr3	195153124	195153624
chr9	122835150	122835650
chr16	30004835	30005335
chr10	132449642	132450142
chr16	73287849	73288349
chr1	34441508	34442008
chr16	20073022	20073522
chr17	77637763	77638263
chr21	38938292	38938792
chr1	187994155	187994655
chr1	208437337	208437837
chr1	247924767	247925267
chr11	3195144	3195644
chr11	110561072	110561572
chr15	93692574	93693074
chr16	62625279	62625779
chr17	3474953	3475453
chr17	51849594	51850094
chr18	8507404	8507904
chr18	69158918	69159418
chr2	33540155	33540655
chr2	98296379	98296879
chr2	136342018	136342518
chr2	217089877	217090377
chr3	15998873	15999373
chr3	27660539	27661039
chr3	62972200	62972700
chr3	76707847	76708347
chr4	102280827	102281327
chr4	155191565	155192065
chr5	7634257	7634757
chr5	60249272	60249772
chr8	71996642	71997142
chr8	117894462	117894962
chr19	7500955	7501455
chr7	1100855	1101355
chr10	97124162	97124662
chr17	57723797	57724297
chr17	77042810	77043310
chr1	81242200	81242700
chr1	209326784	209327284
chr11	78354600	78355100
chr2	9193678	9194178
chr1	44366606	44367106
chr3	117243578	117244078
chr6	63855898	63856398
chr6	12557807	12558307
chr6	7939392	7939892
chr1	14639214	14639714
chr14	69519019	69519519
chr15	56534671	56535171
chr3	97656459	97656959
chr1	204792253	204792753
chr14	58773223	58773723
chr14	95486320	95486820
chr15	91880349	91880849
chr20	57807269	57807769
chr22	22680614	22681114
chr2	2543733	2544233
chr17	27818387	27818887
chr6	9208764	9209264
chr1	211337382	211337882
chr3	26381503	26382003
chr11	15779835	15780335
chr18	11556345	11556845
chr5	125011881	125012381
chr9	94739823	94740323
chr19	29535259	29535759
chr9	83470489	83470989
chr14	34875350	34875850
chr2	31075341	31075841
chr10	102674037	102674537
chr13	114143694	114144194
chr1	236307256	236307756
chr1	30762164	30762664
chr11	22407832	22408332
chr2	31130472	31130972
chr3	66633596	66634096
chr2	234670555	234671055
chr14	105168570	105169070
chr1	43290286	43290786
chr1	80657035	80657535
chr3	137694781	137695281
chr15	50181499	50181999
chr9	7105098	7105598
chr6	25041989	25042489
chr1	63804750	63805250
chr5	170070759	170071259
chr5	6905736	6906236
chr9	629356	629856
chr17	30234866	30235366
chr13	36904292	36904792
chr11	133342355	133342855
chr2	28246943	28247443
chr22	19464011	19464511
chr8	20430455	20430955
chr11	110217762	110218262
chr18	25285213	25285713
chr2	190678253	190678753
chr8	42534976	42535476
chr1	161314645	161315145
chr10	621527	622027
chr12	1253515	1254015
chr8	25964669	25965169
chr16	55040664	55041164
chr6	138577371	138577871
chr9	7104558	7105058
chr9	130447955	130448455
chr4	184644406	184644906
chr15	76187054	76187554
chr14	94888355	94888855
chr13	98443200	98443700
chr16	48850020	48850520
chr4	7125832	7126332
chr4	154082739	154083239
chr17	15116975	15117475
chr2	106339561	106340061
chr2	88765517	88766017
chr10	113947303	113947803
chr15	55775242	55775742
chr8	37295279	37295779
chr17	45688245	45688745
chr3	118637715	118638215
chr22	23232955	23233455
chr9	130925520	130926020
chr12	96112728	96113228
chr8	92504986	92505486
chr12	33708879	33709379
chr16	54084542	54085042
chr19	38652401	38652901
chr11	44207295	44207795
chr7	129925518	129926018
chr8	37263228	37263728
chr1	57136145	57136645
chr2	123717572	123718072
chr10	11431252	11431752
chr10	113733631	113734131
chr11	126615840	126616340
chr14	92450228	92450728
chr17	79621571	79622071
chr13	102045621	102046121
chr2	227457647	227458147
chr6	166757154	166757654
chr12	2094776	2095276
chr10	15251434	15251934
chr22	24170179	24170679
chr10	84499761	84500261
chr10	562729	563229
chr16	23878185	23878685
chr13	33410233	33410733
chr5	136460473	136460973
chr17	34179209	34179709
chr2	236217879	236218379
chr4	6350112	6350612
chr10	129886888	129887388
chr17	79398775	79399275
chr6	139926018	139926518
chr16	27084938	27085438
chr3	23650356	23650856
chr7	77684051	77684551
chr15	69119950	69120450
chr4	57498281	57498781
chr4	152998765	152999265
chr2	45802428	45802928
chr5	10376542	10377042
chr12	111214521	111215021
chr5	36772060	36772560
chr7	75816936	75817436
chr1	240122866	240123366
chr19	29263773	29264273
chr4	13991211	13991711
chr8	102102449	102102949
chr12	5575907	5576407
chr17	79684062	79684562
chr9	113468963	113469463
chr1	48182362	48182862
chr8	8828641	8829141
chr1	209625649	209626149
chr17	18117901	18118401
chr4	104494059	104494559
chr4	177803102	177803602
chr2	232877161	232877661
chr7	3246066	3246566
chr10	103627442	103627942
chr3	3772274	3772774
chr5	171663107	171663607
chr14	81004232	81004732
chr15	69119438	69119938
chr17	15110261	15110761
chr8	98407498	98407998
chr1	179589403	179589903
chr10	33207327	33207827
chr1	181049455	181049955
chr2	86631724	86632224
chr22	48198421	48198921
chr7	103719347	103719847
chr1	215776030	215776530
chr22	20002546	20003046
chr5	157705800	157706300
chr10	128366804	128367304
chr5	22084607	22085107
chr8	123181803	123182303
chr1	230396649	230397149
chr17	29825290	29825790
chr2	57693014	57693514
chr21	16455867	16456367
chr4	138518131	138518631
chr6	44724495	44724995
chr2	184815896	184816396
chr5	14741853	14742353
chr1	84849722	84850222
chr11	124892229	124892729
chr3	114421047	114421547
chr6	124033436	124033936
chr2	79965007	79965507
chr2	6290165	6290665
chr4	3304646	3305146
chr4	47061846	47062346
chr5	2908715	2909215
chr15	100981003	100981503
chr10	13434385	13434885
chr4	146455129	146455629
chr6	37535537	37536037
chr8	20705382	20705882
chr16	88892031	88892531
chr20	9028299	9028799
chr6	22429579	22430079
chr7	158453527	158454027
chr9	119577395	119577895
chr12	115774033	115774533
chr18	77587476	77587976
chr5	168898063	168898563
chr11	115939173	115939673
chr9	82255375	82255875
chr10	79114802	79115302
chr14	81826047	81826547
chr15	37818278	37818778
chr18	78113608	78114108
chr22	37253073	37253573
chr4	187185415	187185915
chr8	61833308	61833808
chr1	48704754	48705254
chr1	116982251	116982751
chr3	78697372	78697872
chr3	105411828	105412328
chr2	31665740	31666240
chr2	117562948	117563448
chr3	177787263	177787763
chr3	184991174	184991674
chr7	18835247	18835747
chr7	141366751	141367251
chr13	52728588	52729088
chr19	13530740	13531240
chr9	26668836	26669336
chr1	101303066	101303566
chr7	26813456	26813956
chr15	33786155	33786655
chr15	62901802	62902302
chr20	48142254	48142754
chr7	37947575	37948075
chr13	39322892	39323392
chr6	164732854	164733354
chr1	2067175	2067675
chr1	14718034	14718534
chr2	233707927	233708427
chr20	31967769	31968269
chr1	41639589	41640089
chr1	60814404	60814904
chr1	76202264	76202764
chr1	85909765	85910265
chr1	97307564	97308064
chr10	82358661	82359161
chr10	114492842	114493342
chr11	14236596	14237096
chr11	20777888	20778388
chr11	45281500	45282000
chr11	105870395	105870895
chr11	117382278	117382778
chr11	121581738	121582238
chr12	9344736	9345236
chr12	71000486	71000986
chr12	131412385	131412885
chr13	93521356	93521856
chr15	73296563	73297063
chr15	77881539	77882039
chr16	16921128	16921628
chr16	64494883	64495383
chr18	52770896	52771396
chr19	35320201	35320701
chr2	12227883	12228383
chr2	22301146	22301646
chr2	30971979	30972479
chr2	34023514	34024014
chr2	134502069	134502569
chr2	137339063	137339563
chr2	174108414	174108914
chr2	184128952	184129452
chr2	184900519	184901019
chr2	184956176	184956676
chr20	47086877	47087377
chr20	59723535	59724035
chr21	19171493	19171993
chr22	41531089	41531589
chr3	2664517	2665017
chr3	39456962	39457462
chr3	68552701	68553201
chr3	150721535	150722035
chr4	160399717	160400217
chr5	56126750	56127250
chr5	57939306	57939806
chr5	136886504	136887004
chr5	137605289	137605789
chr6	1773343	1773843
chr6	112289449	112289949
chr6	137912428	137912928
chr8	35276203	35276703
chr8	55364155	55364655
chr8	66393958	66394458
chr8	77673674	77674174
chr8	119919366	119919866
chr9	19804500	19805000
chr9	119736668	119737168
chr17	75917200	75917700
chr3	122929715	122930215
chr2	22824452	22824952
chr21	38943882	38944382
chr5	138651151	138651651
chr11	92297512	92298012
chr3	42388253	42388753
chr10	129962037	129962537
chr7	158473221	158473721
chr4	4378403	4378903
chr12	130705656	130706156
chr3	50455062	50455562
chr19	29107779	29108279
chr6	125524501	125525001
chr5	155103011	155103511
chr1	183348034	183348534
chr12	129762386	129762886
chr2	6054326	6054826
chr2	57692511	57693011
chr7	54296066	54296566
chr10	129852159	129852659
chr7	80722732	80723232
chr3	99900490	99900990
chr8	79829997	79830497
chr1	60071255	60071755
chr10	93193885	93194385
chr10	131238853	131239353
chr16	84446000	84446500
chr20	15794891	15795391
chr22	42922598	42923098
chr6	52152692	52153192
chr12	86513761	86514261
chr3	171389484	171389984
chr17	79248799	79249299
chr8	117969446	117969946
chr1	245762325	245762825
chr14	51441842	51442342
chr8	30319863	30320363
chr1	199293189	199293689
chr5	172387379	172387879
chr13	29179993	29180493
chr18	64180521	64181021
chr3	97613292	97613792
chr8	79449552	79450052
chr12	1776550	1777050
chr18	27781841	27782341
chr3	131162300	131162800
chr17	2222847	2223347
chr15	98312031	98312531
chr9	117300647	117301147
chr15	37014953	37015453
chr6	165988718	165989218
chr2	216349383	216349883
chr19	38912027	38912527
chr17	2690024	2690524
chr2	203603665	203604165
chr9	96513511	96514011
chr1	237971398	237971898
chr2	49029369	49029869
chr13	30405457	30405957
chr14	103558518	103559018
chr18	67981726	67982226
chr15	73361596	73362096
chr2	145845392	145845892
chr6	129583861	129584361
chr7	2763007	2763507
chr6	22364201	22364701
chr1	7694842	7695342
chr14	61257589	61258089
chr21	16285352	16285852
chr8	129998192	129998692
chr12	119372464	119372964
chr21	38695368	38695868
chr3	138724330	138724830
chr20	57873064	57873564
chr16	23877661	23878161
chr13	24155290	24155790
chr9	16370527	16371027
chr1	64538907	64539407
chr17	83000745	83001245
chr4	5630447	5630947
chr4	7428067	7428567
chr5	42972376	42972876
chr5	172342875	172343375
chr2	16188953	16189453
chr2	159609797	159610297
chr22	48496246	48496746
chr4	175771841	175772341
chr4	99561056	99561556
chr5	168101242	168101742
chr5	133869112	133869612
chr11	114354111	114354611
chr3	193031726	193032226
chr5	154191725	154192225
chr8	6559046	6559546
chr12	1350222	1350722
chr2	65539488	65539988
chr11	44792620	44793120
chr17	79689543	79690043
chr11	117679039	117679539
chr4	125070712	125071212
chr15	65936065	65936565
chr20	60634965	60635465
chr11	1435624	1436124
chr16	79381729	79382229
chr17	76972491	76972991
chr4	121767099	121767599
chr9	95250554	95251054
chr14	90444099	90444599
chr7	155109158	155109658
chr1	2833226	2833726
chr11	131599939	131600439
chr16	53091917	53092417
chr9	117339845	117340345
chr4	66229951	66230451
chr9	119178931	119179431
chr15	56533045	56533545
chr16	56748785	56749285
chr6	107154713	107155213
chr21	43957740	43958240
chr6	114100151	114100651
chr17	14197922	14198422
chr3	69878931	69879431
chr17	20225683	20226183
chr17	82379890	82380390
chr2	26590412	26590912
chr8	37374482	37374982
chr10	125130333	125130833
chr4	17811147	17811647
chr1	100537834	100538334
chr15	77758895	77759395
chr2	225591951	225592451
chr12	29559571	29560071
chr11	113675518	113676018
chr3	127131339	127131839
chr17	38601979	38602479
chr8	34098039	34098539
chr18	5510120	5510620
chr1	161306056	161306556
chr17	66633237	66633737
chr16	80189398	80189898
chr18	2878928	2879428
chr7	44913028	44913528
chr14	94129378	94129878
chr2	10060386	10060886
chr13	93647323	93647823
chr11	28268923	28269423
chr6	158640287	158640787
chr12	123949779	123950279
chr1	41286432	41286932
chr5	176839134	176839634
chr11	37353193	37353693
chr17	18104430	18104930
chr4	151983168	151983668
chr2	44778195	44778695
chr5	163612892	163613392
chr18	10759537	10760037
chr12	132333438	132333938
chr18	33538615	33539115
chr12	106748051	106748551
chr14	51506978	51507478
chr13	46866109	46866609
chr19	17606078	17606578
chr3	130778938	130779438
chr5	96410431	96410931
chr11	61585027	61585527
chr16	67653402	67653902
chr2	48699339	48699839
chr10	234706	235206
chr11	115889615	115890115
chr13	45145097	45145597
chr2	22543628	22544128
chr20	42690797	42691297
chr4	54876972	54877472
chr4	154485779	154486279
chr5	140327506	140328006
chr10	43780332	43780832
chr11	33455759	33456259
chr13	99455608	99456108
chr21	40393053	40393553
chr22	39445746	39446246
chr1	245561809	245562309
chr17	53779995	53780495
chr17	58329379	58329879
chr20	51223336	51223836
chr4	153257034	153257534
chr1	176735927	176736427
chr13	24159298	24159798
chr6	89178152	89178652
chr7	39033441	39033941
chr8	58116753	58117253
chr12	128133686	128134186
chr15	38477519	38478019
chr5	103235701	103236201
chr1	193401977	193402477
chr11	132564416	132564916
chr15	89152985	89153485
chr7	107808836	107809336
chr9	130979494	130979994
chr3	140229345	140229845
chr3	141243171	141243671
chr9	5917861	5918361
chr6	37588518	37589018
chr14	72330445	72330945
chr2	234720340	234720840
chr20	64223383	64223883
chr1	106226394	106226894
chr10	106540757	106541257
chr14	63326809	63327309
chr2	39433453	39433953
chr1	57727121	57727621
chr2	177723239	177723739
chr3	106419346	106419846
chr4	98110174	98110674
chr6	76792266	76792766
chr7	112362652	112363152
chr11	45432840	45433340
chr3	56776501	56777001
chr9	126297471	126297971
chr2	236946857	236947357
chr3	77207590	77208090
chr8	24507131	24507631
chr9	6068338	6068838
chr18	42319753	42320253
chr18	70044935	70045435
chr6	118746092	118746592
chr10	10044922	10045422
chr12	129073636	129074136
chr20	10074408	10074908
chr6	50350081	50350581
chr9	80090284	80090784
chr11	97163195	97163695
chr2	84537148	84537648
chr5	145237364	145237864
chr7	148612857	148613357
chr2	16123332	16123832
chr19	42286242	42286742
chr19	14411066	14411566
chr6	25774192	25774692
chr10	93021840	93022340
chr10	128283775	128284275
chr11	130944808	130945308
chr13	98108190	98108690
chr15	61779144	61779644
chr2	167862690	167863190
chr15	52292359	52292859
chr3	106366330	106366830
chr2	230886599	230887099
chr11	77081599	77082099
chr16	48054957	48055457
chr20	53270771	53271271
chr9	125428786	125429286
chr7	139523941	139524441
chr19	18612613	18613113
chr7	156210014	156210514
chr8	92051363	92051863
chr19	46392449	46392949
chr16	72197423	72197923
chr1	86213887	86214387
chr1	115713556	115714056
chr1	147078052	147078552
chr1	213392971	213393471
chr1	234245971	234246471
chr10	55158571	55159071
chr10	97096986	97097486
chr11	15305109	15305609
chr11	15988117	15988617
chr11	18008426	18008926
chr11	94272757	94273257
chr12	127287509	127288009
chr13	109484253	109484753
chr13	112483384	112483884
chr14	57714430	57714930
chr14	85882313	85882813
chr15	34900687	34901187
chr16	83652744	83653244
chr16	84004318	84004818
chr18	620313	620813
chr18	11566810	11567310
chr18	52829253	52829753
chr2	54294812	54295312
chr2	122939775	122940275
chr2	136638077	136638577
chr20	42554219	42554719
chr21	38326900	38327400
chr22	34639878	34640378
chr3	2830359	2830859
chr3	16528515	16529015
chr3	31679086	31679586
chr3	60810257	60810757
chr3	130901486	130901986
chr4	19683414	19683914
chr4	98127855	98128355
chr4	108225415	108225915
chr4	122733706	122734206
chr4	149279339	149279839
chr4	164440254	164440754
chr5	5652061	5652561
chr5	45687387	45687887
chr5	59943762	59944262
chr5	142659346	142659846
chr6	153697791	153698291
chr7	30166817	30167317
chr7	67789792	67790292
chr7	89373264	89373764
chr7	125934407	125934907
chr7	135914314	135914814
chr7	153175472	153175972
chr8	47437933	47438433
chr9	120645630	120646130
chr1	246681771	246682271
chr10	24168503	24169003
chr9	130426743	130427243
chr9	24298804	24299304
chr16	49530346	49530846
chr8	107423152	107423652
chr17	17748940	17749440
chr2	221254243	221254743
chr9	96482450	96482950
chr1	29523672	29524172
chr12	60997801	60998301
chr18	66216923	66217423
chr2	71796010	71796510
chr4	3524819	3525319
chr12	67644613	67645113
chr13	34320064	34320564
chr2	2781762	2782262
chr3	58157624	58158124
chr10	73653651	73654151
chr6	30926034	30926534
chr4	8039800	8040300
chr8	87700048	87700548
chr7	4838674	4839174
chr15	87967862	87968362
chr4	2433022	2433522
chr10	5966051	5966551
chr13	109902297	109902797
chr16	9614325	9614825
chr5	64295083	64295583
chr22	44074269	44074769
chr19	42177475	42177975
chr13	47413101	47413601
chr20	60792932	60793432
chr21	41407915	41408415
chr10	441648	442148
chr9	23849579	23850079
chr9	130184925	130185425
chr4	150579036	150579536
chr18	52965696	52966196
chr6	142764151	142764651
chr11	97163705	97164205
chr5	151458425	151458925
chr10	128492265	128492765
chr11	134979647	134980147
chr14	50823989	50824489
chr5	76204572	76205072
chr12	94589620	94590120
chr2	145816342	145816842
chr10	548215	548715
chr13	56977502	56978002
chr2	240454279	240454779
chr6	146869691	146870191
[truncated: 398 more rows]
